# Supplementary material for: Sequence-based prediction of SARS-CoV-2 vaccine targets using a mass spectrometry-based bioinformatics predictor identifies immunogenic T cell epitopes
Source: Genome Med. 2020 Aug 13;12:70. doi: 10.1186/s13073-020-00767-w (PMC7425796; doi:10.1186/s13073-020-00767-w)
Supplement: Supplementary file 4 — Additional file 4: Table S4. Predicted HLA-I Binders Ranked by Population Coverage. Table of all predicted HLA-I binders and their associated allele coverage, including additional indicators for overlap with the human proteome or overlap with the ViPR dataset used. (CSV 1448 kb) [file 13073_2020_767_MOESM4_ESM.csv]

protein	start	end	peptide	alleles	USA_coverage	EUR_coverage	API_coverage	hg19_human_proteome_overlap
ORF9b protein	40	48	KVYPIILRL	HLA-A02:01;HLA-A02:03;HLA-A02:04;HLA-A02:07;HLA-A03:01;HLA-A11:01;HLA-A23:01;HLA-A25:01;HLA-A26:01;HLA-A29:02;HLA-A30:01;HLA-A30:02;HLA-A32:01;HLA-A36:01;HLA-A68:02;HLA-B13:02;HLA-B14:02;HLA-B15:01;HLA-B15:03;HLA-B40:02;HLA-B42:01;HLA-B46:01;HLA-B48:01;HLA-B52:01;HLA-B53:01;HLA-B55:01;HLA-B57:01;HLA-B57:03;HLA-B58:01;HLA-B58:02;HLA-B81:01;HLA-C02:02;HLA-C03:03;HLA-C03:04;HLA-C05:01;HLA-C06:02;HLA…	0.99243032	0.995702369	0.97596428	False
orf1a polyprotein;orf1ab polyprotein	1154	1162	FGADPIHSL	HLA-A02:01;HLA-A02:03;HLA-A02:04;HLA-A02:07;HLA-A25:01;HLA-A26:01;HLA-A32:01;HLA-A68:02;HLA-B08:01;HLA-B15:01;HLA-B15:09;HLA-B35:01;HLA-B35:03;HLA-B38:01;HLA-B39:01;HLA-B42:01;HLA-B46:01;HLA-B48:01;HLA-B51:01;HLA-B53:01;HLA-B81:01;HLA-C01:02;HLA-C02:02;HLA-C03:02;HLA-C03:03;HLA-C03:04;HLA-C05:01;HLA-C06:02;HLA-C07:01;HLA-C07:02;HLA-C08:01;HLA-C08:02;HLA-C12:02;HLA-C12:03;HLA-C14:03	0.986512324	0.993688268	0.981438854	False
orf1a polyprotein;orf1ab polyprotein	1808	1816	SAPPAQYEL	HLA-A02:07;HLA-A68:02;HLA-B35:03;HLA-B42:01;HLA-B46:01;HLA-B57:03;HLA-B81:01;HLA-C01:02;HLA-C02:02;HLA-C03:02;HLA-C03:03;HLA-C03:04;HLA-C04:01;HLA-C05:01;HLA-C06:02;HLA-C07:01;HLA-C07:02;HLA-C08:01;HLA-C08:02;HLA-C12:02;HLA-C12:03;HLA-C17:01	0.987468922	0.993085725	0.976409282	False
orf1a polyprotein;orf1ab polyprotein	600	608	YITGGVVQL	HLA-A02:01;HLA-A02:03;HLA-A02:04;HLA-A02:07;HLA-A25:01;HLA-A26:01;HLA-A32:01;HLA-A68:01;HLA-A68:02;HLA-B13:02;HLA-B15:01;HLA-B15:09;HLA-B35:03;HLA-B38:01;HLA-B39:01;HLA-B42:01;HLA-B46:01;HLA-B48:01;HLA-B53:01;HLA-B81:01;HLA-C02:02;HLA-C03:02;HLA-C03:03;HLA-C03:04;HLA-C05:01;HLA-C06:02;HLA-C07:01;HLA-C07:02;HLA-C08:01;HLA-C08:02;HLA-C12:02;HLA-C12:03;HLA-C15:02;HLA-C17:01	0.980553521	0.989655474	0.955449093	False
surface glycoprotein	505	513	YQPYRVVVL	HLA-A02:07;HLA-B08:01;HLA-B13:02;HLA-B14:02;HLA-B15:01;HLA-B15:03;HLA-B15:09;HLA-B37:01;HLA-B39:01;HLA-B42:01;HLA-B48:01;HLA-B52:01;HLA-C01:02;HLA-C02:02;HLA-C03:04;HLA-C04:01;HLA-C05:01;HLA-C06:02;HLA-C07:01;HLA-C07:02;HLA-C08:01;HLA-C12:02;HLA-C14:02;HLA-C14:03;HLA-C15:02	0.970163931	0.978332458	0.973286215	False
orf1a polyprotein;orf1ab polyprotein	1675	1683	YLATALLTL	HLA-A01:01;HLA-A02:01;HLA-A02:03;HLA-A02:04;HLA-A02:07;HLA-A23:01;HLA-A24:02;HLA-A25:01;HLA-A32:01;HLA-B08:01;HLA-B13:02;HLA-B15:01;HLA-B15:09;HLA-B38:01;HLA-B48:01;HLA-B81:01;HLA-C01:02;HLA-C03:02;HLA-C03:03;HLA-C03:04;HLA-C06:02;HLA-C07:02;HLA-C08:01;HLA-C08:02;HLA-C12:02;HLA-C15:02;HLA-C17:01	0.96271196	0.978063752	0.977709365	False
orf1ab polyprotein	5133	5141	FVNEFYAYL	HLA-A02:01;HLA-A02:03;HLA-A02:04;HLA-A02:07;HLA-A25:01;HLA-A26:01;HLA-A68:02;HLA-B35:03;HLA-B46:01;HLA-C01:02;HLA-C02:02;HLA-C03:02;HLA-C03:03;HLA-C03:04;HLA-C04:01;HLA-C05:01;HLA-C06:02;HLA-C07:02;HLA-C08:01;HLA-C08:02;HLA-C12:02;HLA-C15:02;HLA-C17:01	0.963630777	0.967739814	0.980645163	False
surface glycoprotein	1055	1063	SAPHGVVFL	HLA-A02:07;HLA-A68:02;HLA-B35:01;HLA-B35:03;HLA-B48:01;HLA-B51:01;HLA-B53:01;HLA-B81:01;HLA-C01:02;HLA-C02:02;HLA-C03:02;HLA-C03:03;HLA-C03:04;HLA-C04:01;HLA-C05:01;HLA-C06:02;HLA-C07:02;HLA-C08:01;HLA-C08:02;HLA-C12:02;HLA-C12:03;HLA-C14:03;HLA-C15:02;HLA-C17:01	0.960735796	0.958827881	0.984956724	False
orf1a polyprotein;orf1ab polyprotein	3517	3525	SAQTGIAVL	HLA-A25:01;HLA-B15:09;HLA-B35:01;HLA-B35:03;HLA-B42:01;HLA-B48:01;HLA-B53:01;HLA-B57:03;HLA-B81:01;HLA-C01:02;HLA-C02:02;HLA-C03:02;HLA-C03:03;HLA-C03:04;HLA-C05:01;HLA-C06:02;HLA-C07:01;HLA-C07:02;HLA-C08:01;HLA-C08:02;HLA-C12:02;HLA-C12:03;HLA-C14:03;HLA-C17:01	0.955507732	0.970273024	0.951169677	False
ORF8 protein	103	111	SFYEDFLEY	HLA-A01:01;HLA-A03:01;HLA-A11:01;HLA-A23:01;HLA-A24:02;HLA-A25:01;HLA-A26:01;HLA-A29:02;HLA-A30:01;HLA-A30:02;HLA-A32:01;HLA-A36:01;HLA-B15:01;HLA-B15:03;HLA-B18:01;HLA-B35:01;HLA-B44:03;HLA-B46:01;HLA-B53:01;HLA-C02:02;HLA-C03:02;HLA-C07:01;HLA-C07:02;HLA-C08:01;HLA-C12:02;HLA-C14:02;HLA-C14:03	0.956507488	0.964520513	0.950682443	False
orf1ab polyprotein	7064	7072	QINDMILSL	HLA-A02:03;HLA-A02:04;HLA-A02:07;HLA-A03:01;HLA-A25:01;HLA-A26:01;HLA-A32:01;HLA-B08:01;HLA-B35:03;HLA-B39:01;HLA-B42:01;HLA-B46:01;HLA-C01:02;HLA-C02:02;HLA-C03:02;HLA-C03:03;HLA-C03:04;HLA-C06:02;HLA-C07:01;HLA-C07:02;HLA-C08:01;HLA-C08:02;HLA-C12:02;HLA-C14:03;HLA-C15:02	0.938617793	0.955779563	0.970263624	False
orf1a polyprotein;orf1ab polyprotein	3685	3692	YASAVVLL	HLA-A68:02;HLA-B08:01;HLA-B35:01;HLA-B35:03;HLA-B51:01;HLA-B53:01;HLA-B81:01;HLA-C02:02;HLA-C03:02;HLA-C03:03;HLA-C03:04;HLA-C04:01;HLA-C05:01;HLA-C06:02;HLA-C07:02;HLA-C08:01;HLA-C08:02;HLA-C12:02;HLA-C12:03;HLA-C15:02;HLA-C17:01	0.956890361	0.96158176	0.935173755	False
orf1ab polyprotein	5844	5852	AVASKILGL	HLA-A02:01;HLA-A02:03;HLA-A02:04;HLA-A02:07;HLA-A03:01;HLA-A11:01;HLA-A25:01;HLA-A26:01;HLA-A30:01;HLA-A32:01;HLA-A68:02;HLA-B07:02;HLA-B08:01;HLA-B13:02;HLA-B15:01;HLA-B42:01;HLA-B46:01;HLA-B48:01;HLA-B81:01;HLA-C02:02;HLA-C03:03;HLA-C03:04;HLA-C06:02;HLA-C12:02;HLA-C15:02;HLA-C17:01	0.945855456	0.96755265	0.900134473	False
orf1a polyprotein;orf1ab polyprotein	165	173	HSSGVTREL	HLA-A68:02;HLA-B13:02;HLA-B35:03;HLA-B38:01;HLA-B39:01;HLA-B42:01;HLA-B46:01;HLA-B48:01;HLA-B53:01;HLA-B57:03;HLA-B58:01;HLA-B58:02;HLA-B81:01;HLA-C01:02;HLA-C02:02;HLA-C03:02;HLA-C03:03;HLA-C03:04;HLA-C06:02;HLA-C07:01;HLA-C07:02;HLA-C08:01;HLA-C12:02;HLA-C12:03;HLA-C15:02;HLA-C17:01	0.92013218	0.924441489	0.969710793	False
orf1a polyprotein;orf1ab polyprotein	1545	1553	HLDGEVITF	HLA-A01:01;HLA-A02:01;HLA-A02:07;HLA-A24:02;HLA-A25:01;HLA-A26:01;HLA-A29:02;HLA-A32:01;HLA-A36:01;HLA-B13:02;HLA-B15:01;HLA-B15:03;HLA-B15:09;HLA-B35:01;HLA-B35:03;HLA-B38:01;HLA-B39:01;HLA-B53:01;HLA-B57:03;HLA-B58:01;HLA-C04:01;HLA-C05:01;HLA-C07:01;HLA-C08:02;HLA-C17:01	0.958703281	0.975661947	0.841947599	False
ORF7a protein	104	112	VAAIVFITL	HLA-A24:02;HLA-A68:02;HLA-B08:01;HLA-B15:01;HLA-B35:01;HLA-B35:03;HLA-B42:01;HLA-B46:01;HLA-B48:01;HLA-B51:01;HLA-B53:01;HLA-B54:01;HLA-B57:01;HLA-B57:03;HLA-B58:01;HLA-B58:02;HLA-B81:01;HLA-C02:02;HLA-C03:02;HLA-C03:03;HLA-C03:04;HLA-C06:02;HLA-C07:02;HLA-C08:01;HLA-C08:02;HLA-C12:02;HLA-C12:03;HLA-C15:02;HLA-C17:01	0.927486452	0.928703881	0.96074196	False
orf1a polyprotein;orf1ab polyprotein	84	92	VMVELVAEL	HLA-A02:01;HLA-A02:03;HLA-A02:04;HLA-A02:07;HLA-A23:01;HLA-A24:02;HLA-A68:02;HLA-B35:01;HLA-B48:01;HLA-B81:01;HLA-C03:03;HLA-C03:04;HLA-C04:01;HLA-C06:02;HLA-C07:02;HLA-C08:01;HLA-C12:02;HLA-C14:02;HLA-C14:03;HLA-C15:02	0.925490929	0.929756526	0.958192614	False
ORF7b	26	34	IIFWFSLEL	HLA-A02:01;HLA-A02:03;HLA-A02:04;HLA-A02:07;HLA-A03:01;HLA-A32:01;HLA-A68:02;HLA-B15:01;HLA-B15:09;HLA-B35:03;HLA-B46:01;HLA-C01:02;HLA-C02:02;HLA-C03:02;HLA-C03:03;HLA-C03:04;HLA-C06:02;HLA-C07:01;HLA-C08:01;HLA-C08:02;HLA-C12:02;HLA-C14:03;HLA-C15:02;HLA-C17:01	0.934199234	0.951213345	0.932096408	False
orf1a polyprotein;orf1ab polyprotein	4357	4365	ANDPVGFTL	HLA-A02:07;HLA-A23:01;HLA-B07:02;HLA-B15:09;HLA-B35:03;HLA-B38:01;HLA-B39:01;HLA-B40:01;HLA-B42:01;HLA-B44:03;HLA-B48:01;HLA-B57:03;HLA-B58:01;HLA-B58:02;HLA-C03:03;HLA-C03:04;HLA-C04:01;HLA-C05:01;HLA-C07:01;HLA-C07:02;HLA-C08:01;HLA-C08:02;HLA-C15:02	0.944906222	0.95929576	0.897376145	False
orf1a polyprotein;orf1ab polyprotein	554	562	TAQNSVRVL	HLA-B15:09;HLA-B35:01;HLA-B35:03;HLA-B42:01;HLA-B51:01;HLA-B58:02;HLA-B81:01;HLA-C01:02;HLA-C02:02;HLA-C03:02;HLA-C03:03;HLA-C03:04;HLA-C06:02;HLA-C07:01;HLA-C07:02;HLA-C08:01;HLA-C08:02;HLA-C12:02;HLA-C12:03;HLA-C14:03	0.918600863	0.935307746	0.951777528	False
surface glycoprotein	976	984	VLNDILSRL	HLA-A02:01;HLA-A02:03;HLA-A02:04;HLA-A02:07;HLA-A03:01;HLA-A23:01;HLA-A24:02;HLA-A25:01;HLA-A26:01;HLA-A30:02;HLA-A32:01;HLA-B13:02;HLA-B15:01;HLA-B46:01;HLA-B48:01;HLA-B81:01;HLA-C01:02;HLA-C04:01;HLA-C05:01;HLA-C06:02;HLA-C12:02;HLA-C15:02;HLA-C17:01	0.93907142	0.953615056	0.910059001	False
orf1ab polyprotein	6901	6909	FVSDADSTL	HLA-A02:01;HLA-A02:03;HLA-A02:04;HLA-A02:07;HLA-A25:01;HLA-A68:02;HLA-B15:09;HLA-B35:01;HLA-B35:03;HLA-B38:01;HLA-B48:01;HLA-C01:02;HLA-C02:02;HLA-C03:02;HLA-C03:03;HLA-C03:04;HLA-C05:01;HLA-C06:02;HLA-C07:02;HLA-C08:01;HLA-C08:02;HLA-C12:02;HLA-C17:01	0.922861718	0.938249882	0.940889669	False
orf1ab polyprotein	5269	5277	YADVFHLYL	HLA-A01:01;HLA-A02:07;HLA-A36:01;HLA-B35:01;HLA-B35:03;HLA-B38:01;HLA-B51:01;HLA-B53:01;HLA-C01:02;HLA-C02:02;HLA-C03:02;HLA-C03:03;HLA-C03:04;HLA-C04:01;HLA-C05:01;HLA-C06:02;HLA-C08:01;HLA-C08:02;HLA-C12:02;HLA-C12:03;HLA-C15:02;HLA-C17:01	0.926518864	0.926059952	0.940795993	False
orf1ab polyprotein	6246	6254	LLADKFPVL	HLA-A02:01;HLA-A02:03;HLA-A02:04;HLA-A02:07;HLA-A03:01;HLA-A23:01;HLA-A24:02;HLA-A32:01;HLA-A68:02;HLA-B08:01;HLA-B15:09;HLA-B42:01;HLA-B46:01;HLA-B48:01;HLA-B81:01;HLA-C03:02;HLA-C03:04;HLA-C06:02;HLA-C07:02;HLA-C08:01;HLA-C12:02;HLA-C17:01	0.924898213	0.942586308	0.918319655	False
ORF3a protein	33	41	ATIPIQASL	HLA-A02:03;HLA-A02:04;HLA-A02:07;HLA-A03:01;HLA-A11:01;HLA-A25:01;HLA-A26:01;HLA-A30:01;HLA-A30:02;HLA-A32:01;HLA-A68:02;HLA-B07:02;HLA-B15:01;HLA-B15:09;HLA-B39:01;HLA-B40:01;HLA-B40:02;HLA-B44:02;HLA-B44:03;HLA-B46:01;HLA-B48:01;HLA-B57:01;HLA-B57:03;HLA-B58:01;HLA-B58:02;HLA-C02:02;HLA-C03:02;HLA-C03:03;HLA-C03:04;HLA-C08:01;HLA-C12:02;HLA-C12:03;HLA-C15:02	0.907995896	0.92432574	0.944253106	False
orf1ab polyprotein	6633	6641	KVDGVVQQL	HLA-A02:01;HLA-A02:03;HLA-A02:04;HLA-A02:07;HLA-A30:01;HLA-A30:02;HLA-A32:01;HLA-A36:01;HLA-A68:02;HLA-B13:02;HLA-B15:01;HLA-B35:03;HLA-B38:01;HLA-B42:01;HLA-B48:01;HLA-B53:01;HLA-B57:03;HLA-B58:01;HLA-B58:02;HLA-B81:01;HLA-C02:02;HLA-C03:03;HLA-C04:01;HLA-C05:01;HLA-C06:02;HLA-C07:01;HLA-C08:01;HLA-C08:02;HLA-C15:02;HLA-C17:01	0.950193902	0.954155896	0.832183301	False
ORF10 protein	7	16	FAFPFTIYSL	HLA-A02:03;HLA-A02:04;HLA-A02:07;HLA-A25:01;HLA-A68:02;HLA-B35:01;HLA-B35:03;HLA-B46:01;HLA-B48:01;HLA-B51:01;HLA-B53:01;HLA-B54:01;HLA-B57:03;HLA-C02:02;HLA-C03:02;HLA-C03:03;HLA-C03:04;HLA-C06:02;HLA-C07:01;HLA-C07:02;HLA-C08:01;HLA-C08:02;HLA-C12:02;HLA-C12:03;HLA-C17:01	0.918878439	0.929492689	0.922621317	False
orf1a polyprotein;orf1ab polyprotein	1478	1486	SSPDAVTAY	HLA-A01:01;HLA-A03:01;HLA-A11:01;HLA-A25:01;HLA-A26:01;HLA-A29:02;HLA-A30:02;HLA-A36:01;HLA-B15:01;HLA-B15:03;HLA-B46:01;HLA-C01:02;HLA-C02:02;HLA-C03:02;HLA-C06:02;HLA-C07:01;HLA-C07:02;HLA-C12:02;HLA-C14:02;HLA-C14:03	0.912484799	0.936828388	0.918499226	False
surface glycoprotein	1137	1145	VYDPLQPEL	HLA-A01:01;HLA-A02:07;HLA-A23:01;HLA-A24:02;HLA-B15:09;HLA-B38:01;HLA-C03:03;HLA-C03:04;HLA-C04:01;HLA-C05:01;HLA-C06:02;HLA-C07:02;HLA-C08:01;HLA-C08:02;HLA-C14:02;HLA-C14:03;HLA-C17:01	0.920782237	0.932573435	0.909491198	False
ORF7a protein	4	12	ILFLALITL	HLA-A02:01;HLA-A02:03;HLA-A02:04;HLA-A02:07;HLA-A03:01;HLA-A32:01;HLA-B08:01;HLA-B15:01;HLA-B15:03;HLA-B48:01;HLA-B51:01;HLA-B57:03;HLA-B81:01;HLA-C01:02;HLA-C03:02;HLA-C03:04;HLA-C04:01;HLA-C06:02;HLA-C08:01;HLA-C08:02;HLA-C12:02;HLA-C17:01	0.91957646	0.934810311	0.9051492	False
orf1ab polyprotein	6284	6291	KAYKIEEL	HLA-B08:01;HLA-B14:02;HLA-B15:03;HLA-B46:01;HLA-B48:01;HLA-B57:03;HLA-B58:01;HLA-B58:02;HLA-B81:01;HLA-C02:02;HLA-C03:02;HLA-C03:03;HLA-C03:04;HLA-C05:01;HLA-C07:01;HLA-C07:02;HLA-C08:01;HLA-C08:02;HLA-C12:02;HLA-C12:03;HLA-C15:02;HLA-C17:01	0.918990011	0.939325079	0.883242059	False
orf1a polyprotein;orf1ab polyprotein	141	149	KSFDLGDEL	HLA-A30:01;HLA-A30:02;HLA-A32:01;HLA-A36:01;HLA-A68:02;HLA-B15:01;HLA-B15:03;HLA-B48:01;HLA-B57:01;HLA-B57:03;HLA-B58:01;HLA-B58:02;HLA-B81:01;HLA-C02:02;HLA-C03:02;HLA-C03:03;HLA-C03:04;HLA-C06:02;HLA-C07:01;HLA-C07:02;HLA-C08:01;HLA-C12:02;HLA-C12:03;HLA-C15:02	0.905720125	0.920721435	0.912315274	False
orf1ab polyprotein	5223	5230	YPDPSRIL	HLA-B07:02;HLA-B08:01;HLA-B15:09;HLA-B35:01;HLA-B35:03;HLA-B42:01;HLA-B51:01;HLA-B53:01;HLA-C03:03;HLA-C03:04;HLA-C04:01;HLA-C05:01;HLA-C07:01;HLA-C07:02;HLA-C08:02	0.940945035	0.963558567	0.763164007	False
orf1a polyprotein;orf1ab polyprotein	3422	3430	FCYMHHMEL	HLA-B08:01;HLA-B14:02;HLA-B15:09;HLA-B46:01;HLA-C01:02;HLA-C02:02;HLA-C03:02;HLA-C03:03;HLA-C03:04;HLA-C06:02;HLA-C07:02;HLA-C08:01;HLA-C08:02;HLA-C12:02;HLA-C12:03;HLA-C14:02;HLA-C14:03;HLA-C15:02;HLA-C17:01	0.866561753	0.875441976	0.968563763	False
orf1a polyprotein;orf1ab polyprotein	2167	2175	NYMPYFFTL	HLA-A02:04;HLA-A23:01;HLA-A24:02;HLA-B14:02;HLA-B38:01;HLA-B39:01;HLA-C03:03;HLA-C03:04;HLA-C04:01;HLA-C06:02;HLA-C07:01;HLA-C07:02;HLA-C08:01;HLA-C14:02;HLA-C14:03	0.906525169	0.919964737	0.900582828	False
ORF8 protein	53	60	KSAPLIEL	HLA-A36:01;HLA-B15:01;HLA-B37:01;HLA-B46:01;HLA-B48:01;HLA-B57:03;HLA-B58:01;HLA-B58:02;HLA-B81:01;HLA-C02:02;HLA-C03:02;HLA-C03:03;HLA-C03:04;HLA-C06:02;HLA-C07:01;HLA-C07:02;HLA-C08:01;HLA-C12:02;HLA-C12:03;HLA-C15:02;HLA-C17:01	0.891324876	0.908249011	0.918157209	False
envelope protein	20	28	FLAFVVFLL	HLA-A01:01;HLA-A02:01;HLA-A02:03;HLA-A02:04;HLA-A02:07;HLA-A24:02;HLA-A68:02;HLA-B38:01;HLA-B48:01;HLA-C03:04;HLA-C06:02;HLA-C07:02;HLA-C08:01;HLA-C08:02;HLA-C12:02;HLA-C17:01	0.900036291	0.929890885	0.887877335	False
orf1ab polyprotein	5315	5323	AMYTPHTVL	HLA-A02:03;HLA-A23:01;HLA-A32:01;HLA-B07:02;HLA-B14:02;HLA-B15:01;HLA-B15:03;HLA-B15:09;HLA-B39:01;HLA-B40:01;HLA-B42:01;HLA-B48:01;HLA-B81:01;HLA-C03:02;HLA-C03:03;HLA-C03:04;HLA-C07:01;HLA-C07:02;HLA-C08:01;HLA-C08:02;HLA-C12:02;HLA-C12:03;HLA-C14:02;HLA-C14:03;HLA-C17:01	0.899987502	0.919092034	0.898515461	False
orf1ab polyprotein	5246	5254	LMIERFVSL	HLA-A02:01;HLA-A02:03;HLA-A02:04;HLA-A02:07;HLA-A23:01;HLA-A24:02;HLA-B08:01;HLA-B14:02;HLA-B15:01;HLA-B15:09;HLA-B35:01;HLA-B35:03;HLA-B42:01;HLA-B46:01;HLA-B48:01;HLA-B81:01;HLA-C01:02;HLA-C03:02;HLA-C03:03;HLA-C03:04;HLA-C08:01;HLA-C12:02;HLA-C14:02;HLA-C14:03;HLA-C15:02;HLA-C17:01	0.87724598	0.889597911	0.948929435	False
orf1ab polyprotein	6412	6420	HANEYRLYL	HLA-B35:01;HLA-B35:03;HLA-B46:01;HLA-B53:01;HLA-C01:02;HLA-C02:02;HLA-C03:02;HLA-C03:03;HLA-C03:04;HLA-C05:01;HLA-C06:02;HLA-C07:01;HLA-C08:01;HLA-C08:02;HLA-C12:02;HLA-C12:03;HLA-C15:02;HLA-C17:01	0.897251073	0.911471591	0.90571745	False
orf1a polyprotein;orf1ab polyprotein	2225	2233	KLINIIIWF	HLA-A02:01;HLA-A02:03;HLA-A02:04;HLA-A02:07;HLA-A03:01;HLA-A23:01;HLA-A24:02;HLA-A25:01;HLA-A26:01;HLA-A29:02;HLA-A30:01;HLA-A32:01;HLA-A74:01;HLA-B13:02;HLA-B15:01;HLA-B15:03;HLA-B46:01;HLA-B48:01;HLA-B57:01;HLA-B57:03;HLA-B58:01;HLA-B58:02;HLA-C06:02;HLA-C12:02;HLA-C17:01	0.917008974	0.935548033	0.857294369	False
orf1ab polyprotein	6486	6494	KVDGVDVEL	HLA-A02:01;HLA-A02:07;HLA-A30:01;HLA-A32:01;HLA-A36:01;HLA-A68:02;HLA-B35:03;HLA-B38:01;HLA-B42:01;HLA-B48:01;HLA-B53:01;HLA-B57:03;HLA-B58:01;HLA-B58:02;HLA-B81:01;HLA-C02:02;HLA-C03:03;HLA-C03:04;HLA-C04:01;HLA-C05:01;HLA-C07:01;HLA-C08:01;HLA-C08:02;HLA-C15:02;HLA-C17:01	0.934761679	0.93879976	0.804333379	False
surface glycoprotein	269	277	YLQPRTFLL	HLA-A01:01;HLA-A02:01;HLA-A02:03;HLA-A02:04;HLA-A02:07;HLA-A23:01;HLA-A24:02;HLA-B08:01;HLA-C03:04;HLA-C06:02;HLA-C07:02;HLA-C12:02;HLA-C17:01	0.904866951	0.939041282	0.851274237	False
orf1a polyprotein;orf1ab polyprotein	2465	2473	ISDEVARDL	HLA-A01:01;HLA-A02:07;HLA-B35:03;HLA-B57:03;HLA-B58:01;HLA-B58:02;HLA-C03:03;HLA-C03:04;HLA-C04:01;HLA-C05:01;HLA-C06:02;HLA-C07:01;HLA-C08:01;HLA-C08:02;HLA-C12:03;HLA-C15:02;HLA-C17:01	0.925132396	0.943151609	0.819711156	False
orf1ab polyprotein	4632	4639	LLMPILTL	HLA-A02:01;HLA-A02:03;HLA-A02:04;HLA-A02:07;HLA-B08:01;HLA-B14:02;HLA-B15:01;HLA-B46:01;HLA-B51:01;HLA-B58:02;HLA-C01:02;HLA-C03:02;HLA-C03:04;HLA-C04:01;HLA-C06:02;HLA-C08:01;HLA-C08:02;HLA-C12:02;HLA-C15:02;HLA-C17:01	0.88997774	0.899507381	0.924945926	False
ORF3a protein	58	65	SASKIITL	HLA-B08:01;HLA-B35:03;HLA-B39:01;HLA-B42:01;HLA-B48:01;HLA-B51:01;HLA-B53:01;HLA-B57:03;HLA-B81:01;HLA-C02:02;HLA-C03:02;HLA-C03:03;HLA-C03:04;HLA-C05:01;HLA-C06:02;HLA-C07:02;HLA-C08:01;HLA-C08:02;HLA-C12:02;HLA-C12:03;HLA-C15:02;HLA-C17:01	0.89829928	0.913429048	0.893136683	False
ORF8 protein	110	118	EYHDVRVVL	HLA-A23:01;HLA-A24:02;HLA-A30:01;HLA-A33:03;HLA-A68:02;HLA-B08:01;HLA-B14:02;HLA-B35:03;HLA-B38:01;HLA-B39:01;HLA-B42:01;HLA-B44:03;HLA-B48:01;HLA-B81:01;HLA-C04:01;HLA-C06:02;HLA-C07:01;HLA-C07:02;HLA-C08:01;HLA-C14:02;HLA-C14:03	0.904084053	0.904777421	0.894929782	False
orf1a polyprotein;orf1ab polyprotein	4123	4131	AWPLIVTAL	HLA-A02:07;HLA-A23:01;HLA-A24:02;HLA-B07:02;HLA-B15:09;HLA-B37:01;HLA-B40:01;HLA-B42:01;HLA-B44:02;HLA-B44:03;HLA-B48:01;HLA-B81:01;HLA-C01:02;HLA-C04:01;HLA-C06:02;HLA-C07:02;HLA-C08:01;HLA-C08:02;HLA-C14:02;HLA-C14:03	0.883300357	0.888982221	0.928430808	False
nucleocapsid phosphoprotein	307	314	FAPSASAF	HLA-B46:01;HLA-B51:01;HLA-C01:02;HLA-C02:02;HLA-C03:02;HLA-C03:03;HLA-C03:04;HLA-C04:01;HLA-C05:01;HLA-C07:02;HLA-C08:02;HLA-C12:03;HLA-C14:02;HLA-C14:03;HLA-C17:01	0.889205022	0.89306239	0.909801357	False
orf1ab polyprotein	4631	4639	SLLMPILTL	HLA-A02:01;HLA-A02:03;HLA-A02:04;HLA-A02:07;HLA-A03:01;HLA-A23:01;HLA-A24:02;HLA-A25:01;HLA-A30:01;HLA-A32:01;HLA-B08:01;HLA-B13:02;HLA-B15:01;HLA-B15:03;HLA-B15:09;HLA-B38:01;HLA-B42:01;HLA-B48:01;HLA-B81:01;HLA-C03:02;HLA-C03:04;HLA-C08:01;HLA-C15:02;HLA-C17:01	0.904997398	0.929508227	0.852638941	False
orf1a polyprotein;orf1ab polyprotein	2625	2633	SLDNVLSTF	HLA-A01:01;HLA-A02:01;HLA-A02:03;HLA-A02:04;HLA-A02:07;HLA-A23:01;HLA-A24:02;HLA-A25:01;HLA-A29:02;HLA-A32:01;HLA-A36:01;HLA-B15:01;HLA-B15:03;HLA-B38:01;HLA-B46:01;HLA-B53:01;HLA-B57:03;HLA-C04:01;HLA-C05:01;HLA-C08:02;HLA-C17:01	0.920079868	0.943726349	0.777672247	False
orf1ab polyprotein	5107	5115	IADKYVRNL	HLA-A02:07;HLA-B35:03;HLA-B51:01;HLA-B53:01;HLA-C02:02;HLA-C03:03;HLA-C03:04;HLA-C04:01;HLA-C05:01;HLA-C06:02;HLA-C07:01;HLA-C08:01;HLA-C08:02;HLA-C12:02;HLA-C12:03;HLA-C17:01	0.926283883	0.938070635	0.800840853	False
orf1a polyprotein;orf1ab polyprotein	3683	3691	VMYASAVVL	HLA-B14:02;HLA-B15:03;HLA-B15:09;HLA-B35:01;HLA-B39:01;HLA-B42:01;HLA-B48:01;HLA-B51:01;HLA-B81:01;HLA-C03:03;HLA-C03:04;HLA-C04:01;HLA-C06:02;HLA-C07:02;HLA-C08:01;HLA-C08:02;HLA-C12:02;HLA-C12:03;HLA-C14:02;HLA-C14:03;HLA-C17:01	0.889490944	0.883178075	0.906834882	False
orf1ab polyprotein	6876	6883	VAPGTAVL	HLA-B51:01;HLA-B81:01;HLA-C01:02;HLA-C02:02;HLA-C03:02;HLA-C03:03;HLA-C03:04;HLA-C04:01;HLA-C05:01;HLA-C07:02;HLA-C08:01;HLA-C08:02;HLA-C12:03;HLA-C17:01	0.885567596	0.885717178	0.90752812	False
orf1a polyprotein;orf1ab polyprotein	1155	1162	GADPIHSL	HLA-B08:01;HLA-B15:09;HLA-B35:03;HLA-B39:01;HLA-B53:01;HLA-B58:01;HLA-B58:02;HLA-C02:02;HLA-C03:02;HLA-C03:03;HLA-C03:04;HLA-C04:01;HLA-C05:01;HLA-C07:02;HLA-C08:01;HLA-C08:02;HLA-C12:02;HLA-C12:03;HLA-C17:01	0.896332302	0.90091361	0.865168881	False
orf1ab polyprotein	6682	6689	YAFEHIVY	HLA-A29:02;HLA-B14:02;HLA-B15:01;HLA-B15:03;HLA-B18:01;HLA-B35:01;HLA-B46:01;HLA-B51:01;HLA-B53:01;HLA-B54:01;HLA-B58:01;HLA-C02:02;HLA-C03:02;HLA-C03:03;HLA-C03:04;HLA-C06:02;HLA-C07:02;HLA-C08:01;HLA-C12:02;HLA-C12:03;HLA-C14:02;HLA-C14:03	0.861480935	0.864181971	0.930179232	False
orf1ab polyprotein	4515	4523	TMADLVYAL	HLA-A02:01;HLA-A02:03;HLA-A02:04;HLA-A02:07;HLA-A23:01;HLA-A32:01;HLA-A68:02;HLA-B15:09;HLA-B35:01;HLA-B35:03;HLA-B38:01;HLA-B39:01;HLA-B40:01;HLA-B44:02;HLA-B48:01;HLA-B81:01;HLA-C06:02;HLA-C07:01;HLA-C07:02;HLA-C08:01;HLA-C12:02	0.892641983	0.92068713	0.831033315	False
surface glycoprotein	1054	1062	QSAPHGVVF	HLA-A24:02;HLA-A26:01;HLA-B15:01;HLA-B15:03;HLA-B15:09;HLA-B46:01;HLA-B57:01;HLA-B57:03;HLA-B58:01;HLA-B58:02;HLA-C02:02;HLA-C03:02;HLA-C03:03;HLA-C03:04;HLA-C07:01;HLA-C07:02;HLA-C12:02;HLA-C12:03;HLA-C15:02;HLA-C17:01	0.871347306	0.888829794	0.897539442	False
orf1ab polyprotein	4726	4734	FVDGVPFVV	HLA-A01:01;HLA-A02:01;HLA-A02:07;HLA-A68:02;HLA-B35:03;HLA-B54:01;HLA-C02:02;HLA-C03:04;HLA-C04:01;HLA-C05:01;HLA-C06:02;HLA-C08:01;HLA-C08:02;HLA-C12:02;HLA-C15:02	0.902793184	0.927004913	0.803501266	False
orf1a polyprotein;orf1ab polyprotein	1551	1559	ITFDNLKTL	HLA-A02:01;HLA-A02:03;HLA-A02:04;HLA-A02:07;HLA-A23:01;HLA-A25:01;HLA-A26:01;HLA-A30:01;HLA-A32:01;HLA-A68:02;HLA-B14:02;HLA-B15:01;HLA-B40:02;HLA-B42:01;HLA-B57:01;HLA-B57:03;HLA-B58:01;HLA-B58:02;HLA-C02:02;HLA-C03:02;HLA-C03:03;HLA-C03:04;HLA-C06:02;HLA-C08:01;HLA-C12:02;HLA-C12:03;HLA-C15:02	0.885303698	0.894180102	0.879123585	False
orf1a polyprotein;orf1ab polyprotein	1937	1944	FADDLNQL	HLA-A01:01;HLA-A02:07;HLA-B35:01;HLA-B35:03;HLA-B51:01;HLA-B53:01;HLA-C02:02;HLA-C03:02;HLA-C03:03;HLA-C03:04;HLA-C04:01;HLA-C05:01;HLA-C06:02;HLA-C08:01;HLA-C08:02;HLA-C12:02;HLA-C12:03;HLA-C17:01	0.89668652	0.901617339	0.848684355	False
orf1a polyprotein;orf1ab polyprotein	875	883	VADAVIKTL	HLA-A02:07;HLA-B35:01;HLA-B35:03;HLA-B42:01;HLA-B46:01;HLA-B48:01;HLA-B51:01;HLA-B53:01;HLA-B57:03;HLA-B58:02;HLA-B81:01;HLA-C02:02;HLA-C03:02;HLA-C03:03;HLA-C03:04;HLA-C04:01;HLA-C05:01;HLA-C06:02;HLA-C08:01;HLA-C08:02;HLA-C12:02;HLA-C12:03;HLA-C15:02;HLA-C17:01	0.886184841	0.868946917	0.888081416	False
surface glycoprotein	221	229	SALEPLVDL	HLA-A02:01;HLA-A02:04;HLA-A02:07;HLA-B08:01;HLA-B35:01;HLA-B35:03;HLA-B42:01;HLA-B46:01;HLA-B48:01;HLA-B51:01;HLA-B53:01;HLA-B54:01;HLA-B57:03;HLA-B81:01;HLA-C02:02;HLA-C03:02;HLA-C03:03;HLA-C03:04;HLA-C05:01;HLA-C08:01;HLA-C08:02;HLA-C12:02;HLA-C12:03;HLA-C15:02;HLA-C17:01	0.880782513	0.895308268	0.85910142	False
surface glycoprotein	2	10	FVFLVLLPL	HLA-A02:01;HLA-A02:03;HLA-A02:04;HLA-A02:07;HLA-A03:01;HLA-A68:02;HLA-B35:01;HLA-B35:03;HLA-B51:01;HLA-B54:01;HLA-C02:02;HLA-C03:02;HLA-C03:03;HLA-C03:04;HLA-C06:02;HLA-C08:01;HLA-C08:02;HLA-C12:02;HLA-C15:02;HLA-C17:01	0.876733942	0.897375308	0.857373054	False
orf1a polyprotein;orf1ab polyprotein	825	833	FGDDTVIEV	HLA-A02:01;HLA-A02:07;HLA-B35:03;HLA-B39:01;HLA-B51:01;HLA-B53:01;HLA-C02:02;HLA-C03:04;HLA-C04:01;HLA-C05:01;HLA-C06:02;HLA-C08:01;HLA-C08:02;HLA-C12:02;HLA-C12:03;HLA-C15:02	0.891309501	0.904023251	0.816844161	False
orf1ab polyprotein	5679	5687	YVFCTVNAL	HLA-A02:03;HLA-A02:04;HLA-A02:07;HLA-A25:01;HLA-A32:01;HLA-A68:02;HLA-B15:01;HLA-B15:09;HLA-B35:01;HLA-B35:03;HLA-B48:01;HLA-C01:02;HLA-C02:02;HLA-C03:02;HLA-C03:03;HLA-C03:04;HLA-C06:02;HLA-C07:01;HLA-C08:01;HLA-C08:02;HLA-C12:02;HLA-C14:02;HLA-C14:03;HLA-C17:01	0.851946184	0.855726717	0.909520342	False
orf1ab polyprotein	5047	5055	LANECAQVL	HLA-B08:01;HLA-B35:01;HLA-B35:03;HLA-B42:01;HLA-B46:01;HLA-B51:01;HLA-B53:01;HLA-B57:03;HLA-B58:02;HLA-B81:01;HLA-C01:02;HLA-C02:02;HLA-C03:02;HLA-C03:03;HLA-C03:04;HLA-C05:01;HLA-C06:02;HLA-C08:01;HLA-C08:02;HLA-C12:02;HLA-C12:03;HLA-C15:02	0.85452697	0.86094849	0.903430862	False
orf1ab polyprotein	6875	6883	GVAPGTAVL	HLA-A02:01;HLA-A02:03;HLA-A02:04;HLA-A25:01;HLA-A26:01;HLA-A32:01;HLA-A68:02;HLA-B07:02;HLA-B15:01;HLA-B15:09;HLA-B38:01;HLA-B39:01;HLA-B40:01;HLA-B42:01;HLA-B48:01;HLA-B57:03;HLA-B58:01;HLA-B81:01;HLA-C02:02;HLA-C03:02;HLA-C03:03;HLA-C03:04;HLA-C06:02;HLA-C08:01;HLA-C17:01	0.877033971	0.902416096	0.829667497	False
surface glycoprotein	327	335	VRFPNITNL	HLA-A02:03;HLA-A02:04;HLA-A23:01;HLA-A24:02;HLA-B14:02;HLA-B15:09;HLA-B27:05;HLA-B38:01;HLA-B39:01;HLA-B48:01;HLA-C03:03;HLA-C03:04;HLA-C06:02;HLA-C07:01;HLA-C07:02;HLA-C12:02;HLA-C12:03;HLA-C17:01	0.87110278	0.900661808	0.835863254	False
envelope protein	13	21	IVNSVLLFL	HLA-A02:03;HLA-A02:04;HLA-A02:07;HLA-A03:01;HLA-A23:01;HLA-A68:02;HLA-B35:01;HLA-B35:03;HLA-B42:01;HLA-B57:03;HLA-B81:01;HLA-C02:02;HLA-C03:02;HLA-C03:03;HLA-C03:04;HLA-C04:01;HLA-C05:01;HLA-C06:02;HLA-C08:01;HLA-C08:02;HLA-C12:02;HLA-C15:02;HLA-C17:01	0.884681197	0.873621345	0.844619436	False
ORF3a protein	107	115	YLYALVYFL	HLA-A02:01;HLA-A02:03;HLA-A02:04;HLA-A02:07;HLA-A68:02;HLA-B13:02;HLA-B48:01;HLA-C03:04;HLA-C04:01;HLA-C06:02;HLA-C07:02;HLA-C08:01;HLA-C12:02;HLA-C15:02;HLA-C17:01	0.86135913	0.869023042	0.872904686	False
ORF9b protein	13	21	RLVDPQIQL	HLA-A02:01;HLA-A02:03;HLA-A02:04;HLA-A02:07;HLA-A03:01;HLA-A23:01;HLA-A30:01;HLA-A32:01;HLA-A68:02;HLA-B13:02;HLA-B15:01;HLA-B15:03;HLA-B40:01;HLA-B40:02;HLA-B42:01;HLA-B48:01;HLA-B57:03;HLA-B81:01;HLA-C03:04;HLA-C07:01;HLA-C12:02;HLA-C15:02;HLA-C17:01	0.892864705	0.913043128	0.76354765	False
surface glycoprotein	1196	1203	SLIDLQEL	HLA-A02:01;HLA-A02:03;HLA-A02:04;HLA-A02:07;HLA-A25:01;HLA-A68:02;HLA-B08:01;HLA-B13:02;HLA-B14:02;HLA-B15:01;HLA-B40:02;HLA-B46:01;HLA-B81:01;HLA-C01:02;HLA-C03:02;HLA-C03:04;HLA-C06:02;HLA-C08:01;HLA-C08:02;HLA-C12:02;HLA-C14:02;HLA-C14:03;HLA-C17:01	0.844205387	0.867054084	0.895214613	False
orf1a polyprotein;orf1ab polyprotein	4103	4111	DADSKIVQL	HLA-A02:07;HLA-A25:01;HLA-A26:01;HLA-A33:03;HLA-A68:01;HLA-A68:02;HLA-B08:01;HLA-B35:01;HLA-B35:03;HLA-B38:01;HLA-B39:01;HLA-B51:01;HLA-B53:01;HLA-B57:03;HLA-C02:02;HLA-C03:03;HLA-C03:04;HLA-C04:01;HLA-C05:01;HLA-C08:01;HLA-C08:02;HLA-C12:02;HLA-C12:03;HLA-C17:01	0.8825722	0.879185134	0.829233714	False
orf1ab polyprotein	5213	5221	KQGDDYVYL	HLA-A02:01;HLA-A02:04;HLA-A30:01;HLA-A32:01;HLA-B13:02;HLA-B15:01;HLA-B15:03;HLA-B38:01;HLA-B48:01;HLA-C02:02;HLA-C06:02;HLA-C07:01;HLA-C07:02;HLA-C08:01;HLA-C12:02;HLA-C15:02	0.875888774	0.90641856	0.790996707	False
orf1a polyprotein;orf1ab polyprotein	3906	3914	EAFEKMVSL	HLA-A25:01;HLA-A26:01;HLA-A33:03;HLA-A68:01;HLA-A68:02;HLA-B08:01;HLA-B14:02;HLA-B35:01;HLA-B35:03;HLA-B39:01;HLA-B46:01;HLA-B48:01;HLA-B51:01;HLA-B53:01;HLA-B54:01;HLA-B81:01;HLA-C02:02;HLA-C03:02;HLA-C03:03;HLA-C03:04;HLA-C05:01;HLA-C06:02;HLA-C08:01;HLA-C12:02;HLA-C12:03;HLA-C17:01	0.856236974	0.859016023	0.874126953	False
orf1a polyprotein;orf1ab polyprotein	1248	1256	FLTENLLLY	HLA-A01:01;HLA-A02:01;HLA-A02:03;HLA-A02:04;HLA-A02:07;HLA-A03:01;HLA-A25:01;HLA-A26:01;HLA-A29:02;HLA-A30:02;HLA-A32:01;HLA-A36:01;HLA-B15:01;HLA-B53:01;HLA-C03:02;HLA-C06:02;HLA-C12:02	0.897740162	0.950618817	0.684513817	False
envelope protein	23	31	FVVFLLVTL	HLA-A02:01;HLA-A02:03;HLA-A02:04;HLA-A02:07;HLA-A25:01;HLA-A68:01;HLA-A68:02;HLA-B15:01;HLA-B35:01;HLA-B35:03;HLA-B38:01;HLA-B48:01;HLA-B53:01;HLA-B54:01;HLA-B57:03;HLA-B81:01;HLA-C02:02;HLA-C03:02;HLA-C03:03;HLA-C03:04;HLA-C06:02;HLA-C08:01;HLA-C08:02;HLA-C12:02;HLA-C15:02;HLA-C17:01	0.865550947	0.871992482	0.85446456	False
ORF10 protein	7	14	FAFPFTIY	HLA-A29:02;HLA-B15:01;HLA-B15:03;HLA-B18:01;HLA-B35:01;HLA-B46:01;HLA-B51:01;HLA-B53:01;HLA-B54:01;HLA-C02:02;HLA-C03:02;HLA-C03:03;HLA-C03:04;HLA-C06:02;HLA-C07:02;HLA-C08:01;HLA-C12:02;HLA-C12:03;HLA-C17:01	0.845507498	0.847964733	0.88974471	False
membrane glycoprotein	112	120	FNPETNILL	HLA-A02:07;HLA-C01:02;HLA-C03:04;HLA-C04:01;HLA-C05:01;HLA-C06:02;HLA-C07:02;HLA-C08:01;HLA-C08:02;HLA-C14:02;HLA-C17:01	0.846098319	0.846430066	0.888242504	False
membrane glycoprotein	212	220	SSSDNIALL	HLA-A01:01;HLA-A02:03;HLA-A02:04;HLA-A68:01;HLA-A68:02;HLA-B15:09;HLA-B38:01;HLA-B39:01;HLA-B48:01;HLA-B57:03;HLA-B81:01;HLA-C02:02;HLA-C03:03;HLA-C03:04;HLA-C05:01;HLA-C06:02;HLA-C07:01;HLA-C08:02;HLA-C12:02;HLA-C12:03;HLA-C15:02;HLA-C17:01	0.895924545	0.926386319	0.711061352	False
orf1ab polyprotein	5268	5276	EYADVFHLY	HLA-A01:01;HLA-A23:01;HLA-A24:02;HLA-A25:01;HLA-A26:01;HLA-A29:02;HLA-A30:02;HLA-A33:03;HLA-A68:01;HLA-A68:02;HLA-B35:01;HLA-B44:02;HLA-B44:03;HLA-C07:01;HLA-C07:02;HLA-C14:03	0.875116554	0.891984348	0.803312733	False
ORF7b	5	13	SLIDFYLCF	HLA-A02:01;HLA-A02:03;HLA-A02:04;HLA-A02:07;HLA-A03:01;HLA-A23:01;HLA-A24:02;HLA-A25:01;HLA-A26:01;HLA-A29:02;HLA-A32:01;HLA-B15:01;HLA-B15:03;HLA-B38:01;HLA-B46:01;HLA-B53:01;HLA-C03:02;HLA-C12:02;HLA-C14:03;HLA-C17:01	0.873666007	0.905970514	0.798524142	False
orf1a polyprotein;orf1ab polyprotein	2171	2179	YFFTLLLQL	HLA-A02:03;HLA-A02:04;HLA-A23:01;HLA-A24:02;HLA-A29:02;HLA-A68:02;HLA-B14:02;HLA-B35:01;HLA-B38:01;HLA-B39:01;HLA-B48:01;HLA-C02:02;HLA-C03:02;HLA-C03:03;HLA-C03:04;HLA-C04:01;HLA-C06:02;HLA-C08:01;HLA-C12:02;HLA-C14:02;HLA-C14:03;HLA-C15:02;HLA-C17:01	0.845203642	0.809586048	0.908046977	False
orf1ab polyprotein	5727	5735	AQLPAPRTL	HLA-A02:03;HLA-A02:04;HLA-A23:01;HLA-A30:01;HLA-A32:01;HLA-B13:02;HLA-B14:02;HLA-B15:01;HLA-B15:03;HLA-B15:09;HLA-B27:05;HLA-B38:01;HLA-B39:01;HLA-B44:02;HLA-B44:03;HLA-B48:01;HLA-B52:01;HLA-B58:02;HLA-C03:03;HLA-C03:04;HLA-C06:02;HLA-C07:02;HLA-C08:01;HLA-C12:02;HLA-C15:02	0.846184711	0.864898647	0.86891096	False
orf1ab polyprotein	6102	6110	LSDRVVFVL	HLA-A01:01;HLA-A02:07;HLA-B35:03;HLA-B57:03;HLA-B58:01;HLA-B58:02;HLA-C03:03;HLA-C03:04;HLA-C04:01;HLA-C05:01;HLA-C07:01;HLA-C08:01;HLA-C08:02;HLA-C12:03;HLA-C15:02;HLA-C17:01	0.881644259	0.901489598	0.770756369	False
orf1a polyprotein;orf1ab polyprotein	2897	2905	YTPSKLIEY	HLA-A01:01;HLA-A03:01;HLA-A25:01;HLA-A26:01;HLA-A29:02;HLA-A36:01;HLA-B15:01;HLA-B46:01;HLA-C01:02;HLA-C02:02;HLA-C03:02;HLA-C06:02;HLA-C07:02;HLA-C12:02;HLA-C12:03;HLA-C14:02;HLA-C14:03	0.839032867	0.878519322	0.864748689	False
surface glycoprotein	109	117	TLDSKTQSL	HLA-A01:01;HLA-A02:01;HLA-A02:03;HLA-A02:04;HLA-A02:07;HLA-A25:01;HLA-A32:01;HLA-B08:01;HLA-B15:09;HLA-B35:03;HLA-B38:01;HLA-B39:01;HLA-B42:01;HLA-B46:01;HLA-B53:01;HLA-C01:02;HLA-C04:01;HLA-C05:01;HLA-C08:02;HLA-C17:01	0.88012762	0.916285112	0.729783757	False
orf1ab polyprotein	4710	4718	STVFPPTSF	HLA-A11:01;HLA-A24:02;HLA-A25:01;HLA-A26:01;HLA-A29:02;HLA-A32:01;HLA-A68:02;HLA-B15:01;HLA-B15:03;HLA-B15:09;HLA-B46:01;HLA-B57:01;HLA-B57:03;HLA-B58:01;HLA-C02:02;HLA-C03:02;HLA-C03:03;HLA-C03:04;HLA-C07:01;HLA-C12:02;HLA-C12:03	0.831133369	0.846201288	0.887692289	False
orf1a polyprotein;orf1ab polyprotein	3944	3951	IASEFSSL	HLA-B35:01;HLA-B51:01;HLA-C01:02;HLA-C02:02;HLA-C03:02;HLA-C03:03;HLA-C03:04;HLA-C05:01;HLA-C07:02;HLA-C08:01;HLA-C08:02;HLA-C12:02;HLA-C12:03;HLA-C17:01	0.823416116	0.836801683	0.895963036	False
orf1ab polyprotein	4533	4541	TLKEILVTY	HLA-A02:01;HLA-A02:03;HLA-A02:04;HLA-A02:07;HLA-A03:01;HLA-A25:01;HLA-A26:01;HLA-A29:02;HLA-A30:01;HLA-A30:02;HLA-A31:01;HLA-A32:01;HLA-A33:03;HLA-A36:01;HLA-B08:01;HLA-B15:01;HLA-B15:03;HLA-B46:01;HLA-B53:01;HLA-B58:02;HLA-C02:02;HLA-C12:02	0.880689168	0.905933023	0.742114367	False
orf1a polyprotein;orf1ab polyprotein	3482	3490	FLNRFTTTL	HLA-A02:01;HLA-A02:03;HLA-A02:04;HLA-A02:07;HLA-B15:01;HLA-B35:03;HLA-B46:01;HLA-B48:01;HLA-C01:02;HLA-C03:02;HLA-C03:03;HLA-C03:04;HLA-C04:01;HLA-C06:02;HLA-C08:02;HLA-C17:01	0.842881922	0.855416895	0.859754548	False
ORF3a protein	79	87	FVCNLLLLF	HLA-A01:01;HLA-A02:07;HLA-A24:02;HLA-A25:01;HLA-A26:01;HLA-A29:02;HLA-A32:01;HLA-B35:01;HLA-B38:01;HLA-B53:01;HLA-B57:01;HLA-B57:03;HLA-C02:02;HLA-C03:02;HLA-C03:03;HLA-C04:01;HLA-C06:02;HLA-C12:02;HLA-C15:02;HLA-C17:01	0.855971381	0.861421968	0.837179609	False
orf1a polyprotein;orf1ab polyprotein	3078	3086	VAFNTLLFL	HLA-A02:04;HLA-A68:02;HLA-B35:01;HLA-B35:03;HLA-B48:01;HLA-B51:01;HLA-B53:01;HLA-B57:03;HLA-B81:01;HLA-C01:02;HLA-C02:02;HLA-C03:02;HLA-C03:03;HLA-C03:04;HLA-C05:01;HLA-C06:02;HLA-C08:01;HLA-C08:02;HLA-C12:02;HLA-C12:03;HLA-C15:02;HLA-C17:01	0.82991759	0.819182579	0.889830475	False
orf1a polyprotein;orf1ab polyprotein	3103	3111	GVYSVIYLY	HLA-A01:01;HLA-A03:01;HLA-A11:01;HLA-A25:01;HLA-A26:01;HLA-A29:02;HLA-A30:01;HLA-A30:02;HLA-A32:01;HLA-A36:01;HLA-A68:01;HLA-B13:02;HLA-B15:01;HLA-B15:03;HLA-B53:01;HLA-B57:01;HLA-B57:03;HLA-B58:01;HLA-B58:02;HLA-C02:02;HLA-C07:01;HLA-C12:02	0.875178057	0.899952016	0.738042714	False
orf1ab polyprotein	6669	6677	AMDEFIERY	HLA-A01:01;HLA-A02:01;HLA-A02:07;HLA-A25:01;HLA-A29:02;HLA-A30:02;HLA-A32:01;HLA-A36:01;HLA-B15:01;HLA-B15:03;HLA-B18:01;HLA-B38:01;HLA-B44:02;HLA-B44:03;HLA-B46:01;HLA-B53:01;HLA-B58:01;HLA-C04:01	0.887022007	0.920538162	0.675589021	False
orf1a polyprotein;orf1ab polyprotein	906	914	YLFDESGEF	HLA-A02:01;HLA-A02:03;HLA-A02:07;HLA-A23:01;HLA-A24:02;HLA-A25:01;HLA-A26:01;HLA-A29:02;HLA-A32:01;HLA-B15:01;HLA-B15:03;HLA-B46:01;HLA-B53:01;HLA-C02:02;HLA-C03:02;HLA-C07:02;HLA-C14:03	0.844417816	0.865030776	0.826376586	False
ORF3a protein	89	97	TVYSHLLLV	HLA-A02:01;HLA-A02:03;HLA-A02:04;HLA-A02:07;HLA-A03:01;HLA-A11:01;HLA-A26:01;HLA-A68:02;HLA-B13:02;HLA-B51:01;HLA-B52:01;HLA-B55:01;HLA-C02:02;HLA-C06:02;HLA-C12:02;HLA-C15:02	0.835717109	0.874953865	0.81753572	False
orf1ab polyprotein	4673	4681	KLFDRYFKY	HLA-A02:01;HLA-A02:03;HLA-A02:04;HLA-A02:07;HLA-A03:01;HLA-A25:01;HLA-A26:01;HLA-A29:02;HLA-A30:01;HLA-A30:02;HLA-A32:01;HLA-A36:01;HLA-A74:01;HLA-B13:02;HLA-B15:01;HLA-B15:03;HLA-B46:01;HLA-B58:01;HLA-B58:02;HLA-C07:02;HLA-C12:02	0.864964511	0.896352595	0.764910403	False
orf1a polyprotein;orf1ab polyprotein	2535	2543	SLPINVIVF	HLA-A02:07;HLA-A23:01;HLA-A24:02;HLA-A25:01;HLA-A26:01;HLA-A29:02;HLA-A32:01;HLA-B15:01;HLA-B15:03;HLA-C01:02;HLA-C04:01;HLA-C06:02;HLA-C07:02;HLA-C12:02;HLA-C14:02;HLA-C14:03	0.814776534	0.806931111	0.894915142	False
surface glycoprotein	361	369	CVADYSVLY	HLA-A01:01;HLA-A03:01;HLA-A11:01;HLA-A25:01;HLA-A26:01;HLA-A29:02;HLA-A30:01;HLA-A30:02;HLA-A32:01;HLA-A36:01;HLA-A68:01;HLA-B15:01;HLA-B35:01;HLA-B58:01;HLA-C02:02;HLA-C07:01;HLA-C12:02	0.864675582	0.897105769	0.736668091	False
orf1ab polyprotein	5222	5230	PYPDPSRIL	HLA-A23:01;HLA-A24:02;HLA-C01:02;HLA-C04:01;HLA-C06:02;HLA-C07:01;HLA-C07:02;HLA-C14:02;HLA-C14:03	0.834178449	0.841515906	0.850613807	False
orf1a polyprotein;orf1ab polyprotein	536	544	FASEAARVV	HLA-B35:01;HLA-B35:03;HLA-B51:01;HLA-B53:01;HLA-B54:01;HLA-C01:02;HLA-C02:02;HLA-C03:02;HLA-C03:03;HLA-C03:04;HLA-C05:01;HLA-C06:02;HLA-C08:01;HLA-C08:02;HLA-C12:02;HLA-C12:03;HLA-C15:02	0.804773851	0.810674392	0.891988645	False
ORF3a protein	57	65	QSASKIITL	HLA-A25:01;HLA-A32:01;HLA-A68:02;HLA-B08:01;HLA-B35:03;HLA-B38:01;HLA-B39:01;HLA-B42:01;HLA-B46:01;HLA-B48:01;HLA-B57:03;HLA-B58:01;HLA-B58:02;HLA-B81:01;HLA-C02:02;HLA-C03:03;HLA-C03:04;HLA-C06:02;HLA-C07:01;HLA-C08:01;HLA-C12:02;HLA-C12:03;HLA-C15:02;HLA-C17:01	0.846695389	0.860478537	0.807466599	False
orf1a polyprotein;orf1ab polyprotein	2932	2939	YCYDTNVL	HLA-B14:02;HLA-B15:09;HLA-B39:01;HLA-B51:01;HLA-B52:01;HLA-C02:02;HLA-C03:02;HLA-C03:03;HLA-C03:04;HLA-C06:02;HLA-C07:02;HLA-C08:01;HLA-C08:02;HLA-C12:02;HLA-C12:03;HLA-C14:02;HLA-C14:03	0.802074964	0.81715656	0.888285448	False
orf1a polyprotein;orf1ab polyprotein	2780	2788	FLFVAAIFY	HLA-A01:01;HLA-A02:01;HLA-A03:01;HLA-A29:02;HLA-A30:02;HLA-A36:01;HLA-B15:01;HLA-B35:01;HLA-B46:01;HLA-C03:02;HLA-C06:02;HLA-C12:02;HLA-C14:02;HLA-C14:03	0.871641675	0.927806651	0.698043815	False
surface glycoprotein	575	582	AVRDPQTL	HLA-A02:03;HLA-A30:01;HLA-B07:02;HLA-B08:01;HLA-B15:01;HLA-B42:01;HLA-B46:01;HLA-B58:02;HLA-B81:01;HLA-C02:02;HLA-C03:02;HLA-C03:03;HLA-C05:01;HLA-C07:01;HLA-C07:02;HLA-C08:01	0.847427259	0.891923882	0.747177284	False
orf1a polyprotein;orf1ab polyprotein	734	742	KAPKEIIFL	HLA-A02:07;HLA-B48:01;HLA-B57:03;HLA-B81:01;HLA-C01:02;HLA-C02:02;HLA-C03:04;HLA-C05:01;HLA-C06:02;HLA-C07:02;HLA-C08:02;HLA-C12:02;HLA-C12:03;HLA-C15:02;HLA-C17:01	0.824249191	0.844533452	0.836305431	False
orf1a polyprotein;orf1ab polyprotein	882	889	TLQPVSEL	HLA-A02:01;HLA-A02:03;HLA-A02:04;HLA-B08:01;HLA-B15:01;HLA-B15:09;HLA-C01:02;HLA-C03:02;HLA-C04:01;HLA-C07:02;HLA-C08:02;HLA-C14:02;HLA-C14:03;HLA-C17:01	0.835372732	0.860329959	0.816739249	False
orf1a polyprotein;orf1ab polyprotein	4072	4080	VVIPDYNTY	HLA-A01:01;HLA-A03:01;HLA-A11:01;HLA-A25:01;HLA-A26:01;HLA-A29:02;HLA-A30:01;HLA-A30:02;HLA-A32:01;HLA-A36:01;HLA-B15:01;HLA-B15:03;HLA-B18:01;HLA-B35:01;HLA-B46:01;HLA-B53:01;HLA-B57:01;HLA-B57:03;HLA-B58:01;HLA-B58:02;HLA-C02:02;HLA-C03:02;HLA-C12:02	0.845504721	0.865240316	0.787339778	False
orf1a polyprotein;orf1ab polyprotein	1906	1914	YFTEQPIDL	HLA-A23:01;HLA-A24:02;HLA-C03:03;HLA-C03:04;HLA-C04:01;HLA-C06:02;HLA-C07:02;HLA-C08:01;HLA-C14:02;HLA-C14:03;HLA-C17:01	0.813237396	0.801955497	0.876096658	False
orf1a polyprotein;orf1ab polyprotein	4272	4280	FAVDAAKAY	HLA-A25:01;HLA-A29:02;HLA-A30:02;HLA-B35:01;HLA-B35:03;HLA-B46:01;HLA-B53:01;HLA-C02:02;HLA-C03:02;HLA-C03:03;HLA-C03:04;HLA-C06:02;HLA-C07:02;HLA-C08:01;HLA-C12:02;HLA-C12:03;HLA-C14:02;HLA-C14:03	0.798360537	0.803142439	0.890247648	False
orf1a polyprotein;orf1ab polyprotein	2876	2884	TTNGDFLHF	HLA-A01:01;HLA-A23:01;HLA-A24:02;HLA-A25:01;HLA-A26:01;HLA-A29:02;HLA-A32:01;HLA-A36:01;HLA-B15:01;HLA-B35:01;HLA-B53:01;HLA-B57:01;HLA-B57:03;HLA-B58:01;HLA-C02:02;HLA-C03:02;HLA-C03:03;HLA-C07:01;HLA-C15:02	0.845071935	0.865951579	0.769742103	False
ORF7b	17	25	LLFLVLIML	HLA-A02:01;HLA-A02:03;HLA-A02:04;HLA-A02:07;HLA-A03:01;HLA-B08:01;HLA-B15:01;HLA-B35:01;HLA-B48:01;HLA-B81:01;HLA-C03:02;HLA-C04:01;HLA-C06:02;HLA-C12:02;HLA-C17:01	0.855903931	0.891169741	0.714186517	False
orf1a polyprotein;orf1ab polyprotein	3614	3621	FAMGIIAM	HLA-B35:01;HLA-B35:03;HLA-B46:01;HLA-B51:01;HLA-B54:01;HLA-C02:02;HLA-C03:02;HLA-C03:03;HLA-C03:04;HLA-C05:01;HLA-C07:02;HLA-C08:01;HLA-C08:02;HLA-C12:02;HLA-C12:03;HLA-C14:03;HLA-C17:01	0.804897967	0.821414453	0.860787194	False
surface glycoprotein	576	584	VRDPQTLEI	HLA-A02:07;HLA-B14:02;HLA-B38:01;HLA-B39:01;HLA-B53:01;HLA-C04:01;HLA-C05:01;HLA-C06:02;HLA-C07:01;HLA-C07:02;HLA-C08:01;HLA-C08:02	0.865467416	0.890047486	0.707199032	False
orf1a polyprotein;orf1ab polyprotein	2273	2281	STNVTIATY	HLA-A01:01;HLA-A03:01;HLA-A11:01;HLA-A25:01;HLA-A26:01;HLA-A29:02;HLA-A30:02;HLA-A32:01;HLA-A36:01;HLA-B15:01;HLA-B15:03;HLA-B46:01;HLA-B53:01;HLA-B57:01;HLA-B57:03;HLA-B58:01;HLA-C02:02;HLA-C07:01;HLA-C12:03	0.851992445	0.88770693	0.720392435	False
orf1a polyprotein;orf1ab polyprotein	110	118	HVGEIPVAY	HLA-A03:01;HLA-A25:01;HLA-A26:01;HLA-A29:02;HLA-A30:01;HLA-A30:02;HLA-A32:01;HLA-A36:01;HLA-A68:02;HLA-B15:01;HLA-B18:01;HLA-B35:01;HLA-B46:01;HLA-B48:01;HLA-B53:01;HLA-B57:01;HLA-B58:01;HLA-C02:02;HLA-C07:01;HLA-C07:02;HLA-C12:02	0.858284599	0.873682333	0.732895423	False
orf1a polyprotein;orf1ab polyprotein	1437	1445	TLNDLNETL	HLA-A02:01;HLA-A02:03;HLA-A02:04;HLA-A02:07;HLA-A23:01;HLA-A24:02;HLA-A32:01;HLA-A68:02;HLA-B13:02;HLA-B15:01;HLA-B35:03;HLA-B38:01;HLA-B39:01;HLA-B48:01;HLA-B81:01;HLA-C01:02;HLA-C04:01;HLA-C08:02	0.830900061	0.84138367	0.811435109	False
orf1a polyprotein;orf1ab polyprotein	1717	1725	YCNKTVGEL	HLA-B35:03;HLA-C01:02;HLA-C02:02;HLA-C03:04;HLA-C04:01;HLA-C07:01;HLA-C07:02;HLA-C14:02;HLA-C14:03;HLA-C17:01	0.834912271	0.83627041	0.806840134	False
orf1a polyprotein;orf1ab polyprotein	2323	2331	LVAEWFLAY	HLA-A01:01;HLA-A03:01;HLA-A11:01;HLA-A25:01;HLA-A26:01;HLA-A29:02;HLA-A30:02;HLA-A32:01;HLA-A36:01;HLA-B15:01;HLA-B15:03;HLA-B35:01;HLA-B46:01;HLA-B53:01;HLA-B57:01;HLA-C02:02;HLA-C03:02;HLA-C03:04;HLA-C12:02	0.832403176	0.865222952	0.779314898	False
orf1a polyprotein;orf1ab polyprotein	2955	2964	VLMDGSIIQF	HLA-A02:01;HLA-A02:04;HLA-A02:07;HLA-A03:01;HLA-A23:01;HLA-A24:02;HLA-A25:01;HLA-A26:01;HLA-A29:02;HLA-A32:01;HLA-B15:01;HLA-B15:03;HLA-B46:01	0.850153028	0.89712064	0.70873892	False
orf1a polyprotein;orf1ab polyprotein	680	688	KLVNKFLAL	HLA-A02:01;HLA-A02:03;HLA-A02:04;HLA-A02:07;HLA-A03:01;HLA-A23:01;HLA-A25:01;HLA-A30:01;HLA-A32:01;HLA-B08:01;HLA-B48:01;HLA-B81:01;HLA-C01:02;HLA-C03:02;HLA-C03:04;HLA-C08:01;HLA-C15:02	0.829790786	0.86736199	0.805619034	False
orf1a polyprotein;orf1ab polyprotein	3047	3055	IVAGGIVAI	HLA-A02:01;HLA-A02:03;HLA-A02:04;HLA-A03:01;HLA-A25:01;HLA-A26:01;HLA-A32:01;HLA-A68:01;HLA-A68:02;HLA-B13:02;HLA-B15:01;HLA-B15:09;HLA-B35:03;HLA-B38:01;HLA-B42:01;HLA-B53:01;HLA-B55:01;HLA-B57:03;HLA-C06:02;HLA-C08:01;HLA-C08:02;HLA-C12:02;HLA-C17:01	0.862117204	0.895499178	0.678707402	False
orf1ab polyprotein	6764	6772	SVVSKVVKV	HLA-A02:01;HLA-A02:03;HLA-A02:04;HLA-A02:07;HLA-A11:01;HLA-A25:01;HLA-A26:01;HLA-A30:01;HLA-A68:01;HLA-A68:02;HLA-B13:02;HLA-B49:01;HLA-B53:01;HLA-B55:01;HLA-C02:02;HLA-C05:01;HLA-C06:02;HLA-C12:02;HLA-C15:02	0.826461759	0.848563402	0.789242084	False
orf1ab polyprotein	4591	4599	AGIVGVLTL	HLA-A02:03;HLA-A02:04;HLA-A23:01;HLA-A32:01;HLA-B13:02;HLA-B14:02;HLA-B15:01;HLA-B15:03;HLA-B15:09;HLA-B38:01;HLA-B39:01;HLA-B40:02;HLA-B46:01;HLA-B48:01;HLA-B58:02;HLA-C03:02;HLA-C03:03;HLA-C03:04;HLA-C06:02;HLA-C07:01;HLA-C08:01;HLA-C12:02;HLA-C14:02;HLA-C14:03;HLA-C15:02	0.792530839	0.800850821	0.868367833	False
orf1ab polyprotein	4711	4718	TVFPPTSF	HLA-A29:02;HLA-A32:01;HLA-B08:01;HLA-B14:02;HLA-B15:01;HLA-B15:09;HLA-B18:01;HLA-B35:01;HLA-B46:01;HLA-B57:01;HLA-B57:03;HLA-B58:01;HLA-B58:02;HLA-C02:02;HLA-C03:02;HLA-C03:03;HLA-C04:01;HLA-C07:01;HLA-C12:02;HLA-C14:03;HLA-C17:01	0.852990779	0.866740016	0.722005222	False
orf1ab polyprotein	4863	4871	FVVEVVDKY	HLA-A01:01;HLA-A02:07;HLA-A25:01;HLA-A26:01;HLA-A29:02;HLA-A30:02;HLA-A68:02;HLA-B15:01;HLA-B18:01;HLA-B35:01;HLA-B53:01;HLA-B57:01;HLA-B58:01;HLA-C02:02;HLA-C03:02;HLA-C06:02;HLA-C07:02;HLA-C08:01;HLA-C12:02	0.820201046	0.835949346	0.811718739	False
orf1a polyprotein;orf1ab polyprotein	1431	1438	VASLINTL	HLA-B08:01;HLA-B51:01;HLA-B58:02;HLA-C01:02;HLA-C02:02;HLA-C03:02;HLA-C03:03;HLA-C03:04;HLA-C05:01;HLA-C06:02;HLA-C08:01;HLA-C08:02;HLA-C12:02;HLA-C12:03;HLA-C17:01	0.804171207	0.823099341	0.835093192	False
orf1a polyprotein;orf1ab polyprotein	3116	3123	LTNDVSFL	HLA-A01:01;HLA-B58:02;HLA-C02:02;HLA-C03:02;HLA-C03:03;HLA-C03:04;HLA-C04:01;HLA-C05:01;HLA-C06:02;HLA-C08:02;HLA-C12:03;HLA-C15:02	0.849325124	0.874052202	0.706728843	False
ORF7a protein	95	103	ELYSPIFLI	HLA-A02:01;HLA-A02:04;HLA-A03:01;HLA-A23:01;HLA-A24:02;HLA-A25:01;HLA-A26:01;HLA-A32:01;HLA-A33:03;HLA-A68:02;HLA-B13:02;HLA-B38:01	0.839837432	0.878025603	0.716409963	False
orf1ab polyprotein	5613	5621	SHFAIGLAL	HLA-A68:02;HLA-B07:02;HLA-B14:02;HLA-B15:03;HLA-B15:09;HLA-B35:01;HLA-B35:03;HLA-B38:01;HLA-B39:01;HLA-B40:01;HLA-B40:02;HLA-B42:01;HLA-B44:02;HLA-B44:03;HLA-B48:01;HLA-B81:01;HLA-C03:03;HLA-C03:04;HLA-C06:02;HLA-C08:01;HLA-C14:02;HLA-C14:03	0.824802289	0.848421596	0.783384069	False
orf1a polyprotein;orf1ab polyprotein	1936	1944	KFADDLNQL	HLA-A02:01;HLA-A02:03;HLA-A02:04;HLA-A23:01;HLA-A24:02;HLA-A30:01;HLA-A32:01;HLA-B38:01;HLA-B40:01;HLA-B48:01;HLA-B57:03;HLA-B81:01;HLA-C04:01;HLA-C06:02;HLA-C14:02;HLA-C14:03	0.825812533	0.836642814	0.784156852	False
membrane glycoprotein	54	62	LWLLWPVTL	HLA-A02:04;HLA-A23:01;HLA-A24:02;HLA-B08:01;HLA-B14:02;HLA-B35:01;HLA-B48:01;HLA-B51:01;HLA-B54:01;HLA-B58:02;HLA-B81:01;HLA-C03:02;HLA-C03:03;HLA-C03:04;HLA-C04:01;HLA-C08:01;HLA-C14:02;HLA-C14:03;HLA-C15:02;HLA-C17:01	0.795607828	0.771851172	0.870479414	False
ORF9b protein	4	12	KISEMHPAL	HLA-A02:01;HLA-A02:04;HLA-A02:07;HLA-A32:01;HLA-B42:01;HLA-C01:02;HLA-C03:02;HLA-C03:03;HLA-C03:04;HLA-C07:02;HLA-C08:01;HLA-C15:02	0.766232194	0.80060303	0.884207668	False
orf1ab polyprotein	5615	5623	FAIGLALYY	HLA-A01:01;HLA-A26:01;HLA-A29:02;HLA-A30:02;HLA-A36:01;HLA-B35:01;HLA-B35:03;HLA-B46:01;HLA-B53:01;HLA-B57:01;HLA-B58:02;HLA-C02:02;HLA-C03:02;HLA-C03:03;HLA-C03:04;HLA-C06:02;HLA-C08:01;HLA-C12:02;HLA-C12:03;HLA-C15:02;HLA-C17:01	0.806964956	0.811492916	0.827546135	False
orf1a polyprotein;orf1ab polyprotein	3077	3085	VVAFNTLLF	HLA-A01:01;HLA-A03:01;HLA-A23:01;HLA-A24:02;HLA-A26:01;HLA-A29:02;HLA-A32:01;HLA-A36:01;HLA-B15:01;HLA-B35:01;HLA-B53:01;HLA-B57:01;HLA-B58:01;HLA-C02:02;HLA-C03:03;HLA-C17:01	0.838401286	0.867006089	0.702236858	False
orf1a polyprotein;orf1ab polyprotein	860	868	YTVELGTEV	HLA-A02:01;HLA-A02:07;HLA-A25:01;HLA-A26:01;HLA-A68:02;HLA-B49:01;HLA-B54:01;HLA-C02:02;HLA-C03:02;HLA-C03:03;HLA-C03:04;HLA-C06:02;HLA-C08:01;HLA-C12:02;HLA-C12:03;HLA-C15:02	0.797714811	0.82552817	0.816898522	False
nucleocapsid phosphoprotein	307	315	FAPSASAFF	HLA-A24:02;HLA-A29:02;HLA-B35:01;HLA-C01:02;HLA-C02:02;HLA-C03:02;HLA-C03:03;HLA-C03:04;HLA-C04:01;HLA-C05:01;HLA-C12:03;HLA-C14:03;HLA-C17:01	0.80493433	0.796933606	0.821759268	False
membrane glycoprotein	26	34	FLFLTWICL	HLA-A02:01;HLA-A02:03;HLA-A02:04;HLA-A02:07;HLA-B08:01;HLA-C03:02;HLA-C03:04;HLA-C04:01;HLA-C06:02;HLA-C08:01;HLA-C08:02;HLA-C12:02;HLA-C17:01	0.815297415	0.83320651	0.772594657	False
orf1a polyprotein;orf1ab polyprotein	3913	3921	SLLSVLLSM	HLA-A02:01;HLA-A02:03;HLA-A02:04;HLA-A02:07;HLA-A03:01;HLA-A11:01;HLA-A26:01;HLA-A29:02;HLA-A31:01;HLA-A32:01;HLA-B13:02;HLA-C03:02	0.796221772	0.858489545	0.752975597	False
orf1ab polyprotein	5722	5729	YIGDPAQL	HLA-A02:03;HLA-A02:04;HLA-B15:09;HLA-C02:02;HLA-C03:02;HLA-C03:03;HLA-C03:04;HLA-C04:01;HLA-C05:01;HLA-C07:02;HLA-C08:01;HLA-C15:02;HLA-C17:01	0.797143121	0.795307095	0.818301126	False
surface glycoprotein	292	300	ALDPLSETK	HLA-A01:01;HLA-A02:01;HLA-A02:07;HLA-A03:01;HLA-A11:01;HLA-A30:01;HLA-A36:01	0.817643107	0.898372936	0.657459027	False
envelope protein	24	31	VVFLLVTL	HLA-A68:02;HLA-B08:01;HLA-B14:02;HLA-B15:01;HLA-B37:01;HLA-B42:01;HLA-B48:01;HLA-B51:01;HLA-B52:01;HLA-B57:03;HLA-B58:02;HLA-B81:01;HLA-C03:02;HLA-C03:03;HLA-C04:01;HLA-C05:01;HLA-C06:02;HLA-C08:01;HLA-C08:02;HLA-C12:02;HLA-C17:01	0.822713001	0.822982819	0.755590743	False
envelope protein	4	12	FVSEETGTL	HLA-A02:01;HLA-A02:03;HLA-A02:04;HLA-A02:07;HLA-A25:01;HLA-A26:01;HLA-A68:02;HLA-B35:01;HLA-B35:03;HLA-B48:01;HLA-B53:01;HLA-C01:02;HLA-C02:02;HLA-C03:02;HLA-C03:03;HLA-C03:04;HLA-C08:01;HLA-C08:02;HLA-C17:01	0.79491942	0.799412816	0.821083369	False
orf1ab polyprotein	6644	6652	TYFTQSRNL	HLA-A23:01;HLA-A24:02;HLA-A30:01;HLA-C04:01;HLA-C06:02;HLA-C07:01;HLA-C07:02;HLA-C14:02;HLA-C14:03	0.816463369	0.825324093	0.766678971	False
orf1a polyprotein;orf1ab polyprotein	3106	3114	SVIYLYLTF	HLA-A11:01;HLA-A23:01;HLA-A24:02;HLA-A25:01;HLA-A26:01;HLA-A29:02;HLA-A32:01;HLA-B15:01;HLA-B15:03;HLA-B35:03;HLA-B38:01;HLA-B44:03;HLA-B46:01;HLA-B53:01;HLA-B57:01;HLA-B57:03;HLA-B58:01;HLA-C02:02;HLA-C03:02;HLA-C03:03;HLA-C12:02;HLA-C15:02	0.759431164	0.739484823	0.878287927	False
ORF3a protein	105	113	FLYLYALVY	HLA-A01:01;HLA-A03:01;HLA-A29:02;HLA-A30:02;HLA-A32:01;HLA-A36:01;HLA-B15:01;HLA-B15:03;HLA-B35:01;HLA-B46:01;HLA-C03:02;HLA-C06:02;HLA-C07:02;HLA-C12:02;HLA-C14:02;HLA-C14:03	0.805633177	0.8454789	0.760217902	False
orf1ab polyprotein	5481	5489	VLSDRELHL	HLA-A02:01;HLA-A02:03;HLA-A02:04;HLA-A02:07;HLA-A23:01;HLA-A24:02;HLA-A32:01;HLA-B13:02;HLA-C01:02;HLA-C06:02;HLA-C08:01;HLA-C12:02;HLA-C15:02;HLA-C17:01	0.767337802	0.781932477	0.850799003	False
envelope protein	57	65	YVYSRVKNL	HLA-A02:03;HLA-A02:04;HLA-A02:07;HLA-A25:01;HLA-A26:01;HLA-A32:01;HLA-A68:02;HLA-B08:01;HLA-B14:02;HLA-B35:03;HLA-B42:01;HLA-B51:01;HLA-B53:01;HLA-C02:02;HLA-C03:02;HLA-C03:03;HLA-C03:04;HLA-C06:02;HLA-C08:01;HLA-C12:02;HLA-C12:03;HLA-C15:02;HLA-C17:01	0.788670642	0.788082079	0.824175699	False
membrane glycoprotein	130	138	TRPLLESEL	HLA-B15:09;HLA-B38:01;HLA-B39:01;HLA-C01:02;HLA-C04:01;HLA-C06:02;HLA-C07:01;HLA-C07:02;HLA-C08:01	0.791272165	0.80512015	0.799430488	False
orf1a polyprotein;orf1ab polyprotein	1515	1523	SYSGQSTQL	HLA-A23:01;HLA-A24:02;HLA-B15:09;HLA-B39:01;HLA-B81:01;HLA-C04:01;HLA-C06:02;HLA-C07:01;HLA-C07:02;HLA-C14:02;HLA-C14:03	0.811348917	0.823392454	0.761321503	False
orf1ab polyprotein	4773	4781	HAASGNLLL	HLA-A26:01;HLA-A68:02;HLA-B15:09;HLA-B35:01;HLA-B35:03;HLA-B38:01;HLA-B39:01;HLA-B48:01;HLA-B53:01;HLA-B57:03;HLA-B58:01;HLA-B81:01;HLA-C02:02;HLA-C03:03;HLA-C03:04;HLA-C05:01;HLA-C06:02;HLA-C08:01;HLA-C08:02;HLA-C12:02;HLA-C12:03;HLA-C15:02;HLA-C17:01	0.806797826	0.803580712	0.782027949	False
envelope protein	31	39	LAILTALRL	HLA-B35:01;HLA-B35:03;HLA-B51:01;HLA-B53:01;HLA-B54:01;HLA-C02:02;HLA-C03:02;HLA-C03:03;HLA-C03:04;HLA-C05:01;HLA-C06:02;HLA-C08:01;HLA-C08:02;HLA-C12:02;HLA-C12:03;HLA-C15:02;HLA-C17:01	0.789995913	0.793041285	0.806942001	False
orf1a polyprotein;orf1ab polyprotein	1430	1438	TVASLINTL	HLA-A02:01;HLA-A02:03;HLA-A02:04;HLA-A25:01;HLA-A26:01;HLA-A32:01;HLA-A68:01;HLA-A68:02;HLA-B13:02;HLA-B15:01;HLA-B15:09;HLA-B35:01;HLA-B35:03;HLA-B38:01;HLA-B39:01;HLA-B42:01;HLA-B48:01;HLA-B53:01;HLA-B57:03;HLA-B58:02;HLA-B81:01;HLA-C02:02;HLA-C06:02;HLA-C08:01;HLA-C12:02;HLA-C17:01	0.827883738	0.83791696	0.709070393	False
orf1a polyprotein;orf1ab polyprotein	3367	3375	VRIQPGQTF	HLA-A23:01;HLA-A24:02;HLA-A29:02;HLA-B15:01;HLA-B15:03;HLA-B15:09;HLA-B27:05;HLA-B38:01;HLA-B39:01;HLA-B46:01;HLA-B53:01;HLA-B57:01;HLA-B57:03;HLA-B58:01;HLA-C02:02;HLA-C03:03;HLA-C07:01;HLA-C07:02	0.806451289	0.823674685	0.755340463	False
orf1ab polyprotein	6359	6367	SAFVNLKQL	HLA-A02:03;HLA-A02:04;HLA-A25:01;HLA-A30:01;HLA-A68:02;HLA-B14:02;HLA-B35:01;HLA-B35:03;HLA-B42:01;HLA-B48:01;HLA-B51:01;HLA-B53:01;HLA-B57:03;HLA-B81:01;HLA-C01:02;HLA-C02:02;HLA-C03:02;HLA-C03:03;HLA-C03:04;HLA-C06:02;HLA-C12:02;HLA-C12:03;HLA-C15:02;HLA-C17:01	0.779972765	0.747580313	0.849459945	False
surface glycoprotein	1210	1218	IKWPWYIWL	HLA-B14:02;HLA-B15:03;HLA-B48:01;HLA-C03:03;HLA-C03:04;HLA-C06:02;HLA-C07:01;HLA-C07:02;HLA-C08:01;HLA-C12:02;HLA-C17:01	0.790029702	0.820728262	0.769860211	False
ORF3a protein	8	15	FTIGTVTL	HLA-A68:02;HLA-B57:03;HLA-B58:01;HLA-B58:02;HLA-C02:02;HLA-C03:02;HLA-C03:03;HLA-C03:04;HLA-C04:01;HLA-C05:01;HLA-C08:01;HLA-C08:02;HLA-C12:02;HLA-C12:03;HLA-C14:02;HLA-C14:03;HLA-C15:02;HLA-C17:01	0.792158258	0.76264648	0.82205537	False
orf1ab polyprotein	4725	4733	IFVDGVPFV	HLA-A02:01;HLA-A02:04;HLA-A02:07;HLA-A23:01;HLA-A24:02;HLA-A68:02;HLA-B51:01;HLA-C04:01;HLA-C06:02;HLA-C12:02;HLA-C14:02;HLA-C14:03	0.799799034	0.805501091	0.77526763	False
orf1ab polyprotein	5721	5729	VYIGDPAQL	HLA-A02:03;HLA-A23:01;HLA-A24:02;HLA-A30:01;HLA-B15:09;HLA-B38:01;HLA-C03:03;HLA-C04:01;HLA-C06:02;HLA-C07:02;HLA-C08:01;HLA-C14:02;HLA-C14:03;HLA-C17:01	0.77307328	0.750244283	0.846801084	False
ORF10 protein	8	16	AFPFTIYSL	HLA-A02:07;HLA-A23:01;HLA-A24:02;HLA-B48:01;HLA-C01:02;HLA-C04:01;HLA-C07:01;HLA-C07:02;HLA-C14:02;HLA-C14:03	0.772401731	0.768427385	0.833879027	False
membrane glycoprotein	94	102	SYFIASFRL	HLA-A23:01;HLA-A24:02;HLA-C04:01;HLA-C06:02;HLA-C07:01;HLA-C07:02;HLA-C14:02;HLA-C14:03	0.806607502	0.819977577	0.754420781	False
orf1a polyprotein;orf1ab polyprotein	2330	2338	AYILFTRFF	HLA-A23:01;HLA-A24:02;HLA-A29:02;HLA-B15:01;HLA-B15:03;HLA-B44:02;HLA-B44:03;HLA-C04:01;HLA-C06:02;HLA-C07:02;HLA-C14:02;HLA-C14:03	0.801481823	0.808044503	0.768090612	False
surface glycoprotein	1185	1193	RLNEVAKNL	HLA-A02:01;HLA-A02:03;HLA-A02:04;HLA-A02:07;HLA-A03:01;HLA-A30:01;HLA-A30:02;HLA-A32:01;HLA-A74:01;HLA-B13:02;HLA-B15:01;HLA-B42:01;HLA-B48:01;HLA-B58:02;HLA-B81:01;HLA-C01:02;HLA-C06:02;HLA-C15:02	0.811326605	0.844417622	0.717075961	False
ORF3a protein	207	215	FTSDYYQLY	HLA-A01:01;HLA-A25:01;HLA-A26:01;HLA-A29:02;HLA-A30:02;HLA-A32:01;HLA-A36:01;HLA-B35:01;HLA-B46:01;HLA-B53:01;HLA-B57:01;HLA-B58:02;HLA-C02:02;HLA-C03:02;HLA-C06:02;HLA-C07:02;HLA-C12:02;HLA-C12:03	0.798872984	0.823652765	0.735985044	False
orf1a polyprotein;orf1ab polyprotein	2956	2964	LMDGSIIQF	HLA-A01:01;HLA-A02:07;HLA-A24:02;HLA-A36:01;HLA-B15:01;HLA-B15:03;HLA-B35:01;HLA-B35:03;HLA-B38:01;HLA-B53:01;HLA-C02:02;HLA-C03:03;HLA-C04:01;HLA-C05:01;HLA-C08:02;HLA-C17:01	0.820253647	0.830151758	0.698040179	False
ORF9b protein	41	48	VYPIILRL	HLA-A23:01;HLA-A24:02;HLA-B51:01;HLA-B52:01;HLA-C01:02;HLA-C04:01;HLA-C06:02;HLA-C07:02;HLA-C14:02;HLA-C14:03	0.751204766	0.732424483	0.85817785	False
orf1ab polyprotein	5690	5697	TTADIVVF	HLA-A25:01;HLA-A26:01;HLA-A68:02;HLA-B15:01;HLA-B18:01;HLA-B35:01;HLA-B39:01;HLA-B46:01;HLA-B57:01;HLA-B57:03;HLA-B58:01;HLA-B58:02;HLA-C02:02;HLA-C03:02;HLA-C07:01;HLA-C07:02;HLA-C12:02;HLA-C12:03	0.790018892	0.815397739	0.752945567	False
orf1ab polyprotein	4736	4743	TGYHFREL	HLA-B08:01;HLA-B14:02;HLA-B51:01;HLA-B52:01;HLA-B58:02;HLA-C03:02;HLA-C03:04;HLA-C06:02;HLA-C07:01;HLA-C07:02	0.795058839	0.840267218	0.709662403	False
orf1a polyprotein;orf1ab polyprotein	3153	3161	FYWFFSNYL	HLA-A23:01;HLA-A24:02;HLA-C03:04;HLA-C04:01;HLA-C06:02;HLA-C07:02;HLA-C08:02;HLA-C14:02;HLA-C14:03	0.785316227	0.783557811	0.792073047	False
orf1a polyprotein;orf1ab polyprotein	2168	2176	YMPYFFTLL	HLA-A02:07;HLA-A23:01;HLA-A24:02;HLA-C01:02;HLA-C03:02;HLA-C04:01;HLA-C06:02;HLA-C07:02;HLA-C08:01;HLA-C17:01	0.738427337	0.696961273	0.886261812	False
orf1a polyprotein;orf1ab polyprotein	2097	2105	AAYVDNSSL	HLA-B15:01;HLA-B15:09;HLA-B35:01;HLA-B35:03;HLA-B46:01;HLA-B48:01;HLA-B57:03;HLA-B58:01;HLA-B81:01;HLA-C01:02;HLA-C02:02;HLA-C03:02;HLA-C03:03;HLA-C03:04;HLA-C05:01;HLA-C08:01;HLA-C08:02;HLA-C12:02;HLA-C12:03;HLA-C14:03;HLA-C17:01	0.743281564	0.736656127	0.860571472	False
ORF6 protein	10	18	TIAEILLII	HLA-A02:01;HLA-A02:03;HLA-A02:04;HLA-A03:01;HLA-A25:01;HLA-A26:01;HLA-A32:01;HLA-A68:02;HLA-B13:02;HLA-B38:01;HLA-B51:01;HLA-C06:02;HLA-C08:01;HLA-C12:02;HLA-C15:02	0.805446255	0.858626404	0.697672995	False
ORF7b	14	22	LAFLLFLVL	HLA-B14:02;HLA-B35:01;HLA-B35:03;HLA-B48:01;HLA-B51:01;HLA-B53:01;HLA-B54:01;HLA-B57:01;HLA-B57:03;HLA-B58:02;HLA-B81:01;HLA-C02:02;HLA-C03:02;HLA-C03:03;HLA-C03:04;HLA-C06:02;HLA-C08:01;HLA-C08:02;HLA-C12:02;HLA-C12:03;HLA-C15:02;HLA-C17:01	0.777656605	0.757490015	0.820629916	False
ORF9b protein	46	54	LRLGSPLSL	HLA-B14:02;HLA-B15:09;HLA-B27:05;HLA-B38:01;HLA-B39:01;HLA-C03:03;HLA-C03:04;HLA-C06:02;HLA-C07:01;HLA-C07:02;HLA-C08:01	0.780263453	0.83143844	0.727570145	False
orf1ab polyprotein	6611	6619	QASLNGVTL	HLA-B07:02;HLA-B15:09;HLA-B35:01;HLA-B35:03;HLA-B42:01;HLA-B48:01;HLA-B57:03;HLA-B58:02;HLA-B81:01;HLA-C01:02;HLA-C02:02;HLA-C03:02;HLA-C03:03;HLA-C03:04;HLA-C05:01;HLA-C08:01;HLA-C08:02;HLA-C12:02;HLA-C12:03;HLA-C17:01	0.774239021	0.777165813	0.798991179	False
ORF3a protein	71	79	LALSKGVHF	HLA-A23:01;HLA-A24:02;HLA-A29:02;HLA-B35:01;HLA-B35:03;HLA-B46:01;HLA-B51:01;HLA-B53:01;HLA-B54:01;HLA-B57:01;HLA-B57:03;HLA-B58:01;HLA-C02:02;HLA-C03:02;HLA-C03:03;HLA-C03:04;HLA-C05:01;HLA-C12:03;HLA-C17:01	0.772866887	0.761187162	0.809729724	False
orf1a polyprotein;orf1ab polyprotein	3871	3879	VLLSVLQQL	HLA-A02:01;HLA-A02:03;HLA-A02:04;HLA-A02:07;HLA-A03:01;HLA-A23:01;HLA-A24:02;HLA-A32:01;HLA-B13:02;HLA-B42:01;HLA-B48:01;HLA-B57:03;HLA-B58:02;HLA-B81:01;HLA-C03:02;HLA-C17:01	0.796912368	0.831516249	0.70190197	False
orf1ab polyprotein	5381	5389	VTDVTQLYL	HLA-A01:01;HLA-A02:07;HLA-A36:01;HLA-B57:03;HLA-C02:02;HLA-C03:03;HLA-C03:04;HLA-C04:01;HLA-C05:01;HLA-C08:01;HLA-C08:02;HLA-C12:03;HLA-C15:02;HLA-C17:01	0.806424095	0.817320571	0.694067089	False
membrane glycoprotein	46	54	LYIIKLIFL	HLA-A23:01;HLA-A24:02;HLA-B08:01;HLA-C03:03;HLA-C03:04;HLA-C04:01;HLA-C06:02;HLA-C12:02;HLA-C14:02;HLA-C14:03;HLA-C15:02;HLA-C17:01	0.769070497	0.764708169	0.796395102	False
orf1a polyprotein;orf1ab polyprotein	528	536	SILSPLYAF	HLA-A02:04;HLA-A03:01;HLA-A11:01;HLA-A23:01;HLA-A24:02;HLA-A25:01;HLA-A26:01;HLA-A29:02;HLA-A32:01;HLA-B15:01;HLA-B27:05;HLA-B46:01;HLA-C02:02;HLA-C03:02;HLA-C03:03	0.748581767	0.772777382	0.803527362	False
surface glycoprotein	1055	1062	SAPHGVVF	HLA-B46:01;HLA-B53:01;HLA-B81:01;HLA-C01:02;HLA-C02:02;HLA-C03:02;HLA-C04:01;HLA-C05:01;HLA-C07:02;HLA-C12:02;HLA-C12:03;HLA-C14:02;HLA-C14:03	0.747732028	0.736101862	0.832216975	False
orf1a polyprotein;orf1ab polyprotein	2076	2084	ILKPANNSL	HLA-A02:01;HLA-A02:03;HLA-A02:04;HLA-A02:07;HLA-A24:02;HLA-A32:01;HLA-B08:01;HLA-B15:01;HLA-B42:01;HLA-B46:01;HLA-C01:02;HLA-C08:02	0.753981623	0.805301559	0.763997938	False
orf1a polyprotein;orf1ab polyprotein	881	889	KTLQPVSEL	HLA-A02:04;HLA-A03:01;HLA-A23:01;HLA-A30:01;HLA-A32:01;HLA-B57:01;HLA-B57:03;HLA-B58:01;HLA-B58:02;HLA-C03:03;HLA-C03:04;HLA-C05:01;HLA-C07:01;HLA-C08:01;HLA-C12:03;HLA-C15:02	0.797025054	0.832774995	0.672410209	False
ORF7b	13	20	FLAFLLFL	HLA-A01:01;HLA-A02:01;HLA-A02:03;HLA-A02:04;HLA-B08:01;HLA-C03:02;HLA-C03:04;HLA-C06:02;HLA-C08:02;HLA-C17:01	0.805031162	0.868855352	0.591565855	False
orf1a polyprotein;orf1ab polyprotein	3684	3692	MYASAVVLL	HLA-A23:01;HLA-A24:02;HLA-A68:02;HLA-B15:09;HLA-B35:01;HLA-B38:01;HLA-B39:01;HLA-B48:01;HLA-B81:01;HLA-C04:01;HLA-C06:02;HLA-C07:02;HLA-C12:02;HLA-C14:02;HLA-C14:03;HLA-C17:01	0.772168384	0.745291093	0.798048228	False
orf1ab polyprotein	6446	6454	NTFTRLQSL	HLA-A02:03;HLA-A25:01;HLA-A26:01;HLA-A32:01;HLA-A68:02;HLA-B08:01;HLA-B14:02;HLA-B57:03;HLA-C01:02;HLA-C02:02;HLA-C03:02;HLA-C03:03;HLA-C03:04;HLA-C06:02;HLA-C12:02;HLA-C12:03;HLA-C15:02	0.747300384	0.768787764	0.809627219	False
orf1a polyprotein;orf1ab polyprotein	3085	3092	FLMSFTVL	HLA-A02:01;HLA-B08:01;HLA-C01:02;HLA-C03:02;HLA-C03:04;HLA-C04:01;HLA-C08:01;HLA-C08:02;HLA-C14:03;HLA-C17:01	0.776767701	0.79446817	0.763078723	False
surface glycoprotein	1144	1152	ELDSFKEEL	HLA-A01:01;HLA-A02:01;HLA-A02:07;HLA-A68:02;HLA-B08:01;HLA-B38:01;HLA-C04:01;HLA-C05:01;HLA-C08:02	0.827316445	0.883366293	0.482049091	False
orf1a polyprotein;orf1ab polyprotein	3006	3014	LNNDYYRSL	HLA-B35:03;HLA-B42:01;HLA-B46:01;HLA-B58:02;HLA-C03:03;HLA-C03:04;HLA-C06:02;HLA-C07:01;HLA-C07:02;HLA-C15:02	0.76665036	0.816649439	0.731064742	False
orf1ab polyprotein	6885	6893	QWLPTGTLL	HLA-A23:01;HLA-A24:02;HLA-B07:02;HLA-B15:09;HLA-B27:05;HLA-B38:01;HLA-B40:01;HLA-B44:02;HLA-B44:03;HLA-C03:04;HLA-C04:01;HLA-C14:02;HLA-C17:01	0.785985778	0.811618578	0.71623562	False
orf1ab polyprotein	4735	4743	STGYHFREL	HLA-A25:01;HLA-A30:01;HLA-A68:02;HLA-B42:01;HLA-B58:02;HLA-C02:02;HLA-C03:02;HLA-C03:03;HLA-C03:04;HLA-C06:02;HLA-C07:01;HLA-C08:01;HLA-C12:02;HLA-C12:03;HLA-C15:02	0.76715737	0.781051031	0.760600399	False
envelope protein	20	27	FLAFVVFL	HLA-A02:01;HLA-A02:03;HLA-A02:04;HLA-A68:02;HLA-B08:01;HLA-C03:04;HLA-C04:01;HLA-C06:02;HLA-C08:02;HLA-C12:02;HLA-C17:01	0.812276024	0.836439554	0.616913181	False
orf1ab polyprotein	6499	6507	TTLPVNVAF	HLA-A03:01;HLA-A23:01;HLA-A24:02;HLA-A25:01;HLA-A26:01;HLA-A29:02;HLA-A32:01;HLA-A68:02;HLA-B15:01;HLA-B35:01;HLA-B39:01;HLA-B44:02;HLA-B57:01;HLA-B57:03;HLA-B58:01;HLA-B58:02;HLA-C03:02;HLA-C03:03	0.785254954	0.808902115	0.707725647	False
orf1ab polyprotein	4821	4829	FKEGSSVEL	HLA-B15:03;HLA-B15:09;HLA-B35:03;HLA-B38:01;HLA-B39:01;HLA-B48:01;HLA-C03:03;HLA-C03:04;HLA-C04:01;HLA-C05:01;HLA-C07:02;HLA-C08:01;HLA-C08:02	0.775995893	0.793331617	0.73638597	False
nucleocapsid phosphoprotein	216	224	DAALALLLL	HLA-A68:02;HLA-B08:01;HLA-B14:02;HLA-B35:01;HLA-B51:01;HLA-C02:02;HLA-C03:02;HLA-C03:03;HLA-C03:04;HLA-C06:02;HLA-C08:01;HLA-C12:02;HLA-C12:03;HLA-C15:02;HLA-C17:01	0.762160588	0.773233976	0.777930773	False
orf1a polyprotein;orf1ab polyprotein	1262	1270	NLHPDSATL	HLA-A02:01;HLA-A02:03;HLA-A02:04;HLA-A02:07;HLA-A32:01;HLA-B08:01;HLA-B15:01;HLA-B15:09;HLA-B38:01;HLA-B39:01;HLA-B46:01;HLA-C01:02;HLA-C07:02	0.751768574	0.816070927	0.737683988	False
orf1ab polyprotein	6750	6758	LLDDFVEII	HLA-A01:01;HLA-A02:01;HLA-A02:03;HLA-A02:04;HLA-A02:07;HLA-B13:02;HLA-B38:01;HLA-B53:01;HLA-C04:01;HLA-C05:01;HLA-C08:01;HLA-C08:02	0.802608975	0.851096558	0.608098622	False
nucleocapsid phosphoprotein	375	382	KADETQAL	HLA-A02:07;HLA-B46:01;HLA-B58:01;HLA-B58:02;HLA-B81:01;HLA-C01:02;HLA-C03:02;HLA-C03:03;HLA-C03:04;HLA-C04:01;HLA-C05:01;HLA-C08:01;HLA-C08:02;HLA-C12:03;HLA-C17:01	0.735663225	0.709562582	0.840578108	False
ORF3a protein	211	219	YYQLYSTQL	HLA-A23:01;HLA-A24:02;HLA-B15:09;HLA-C03:03;HLA-C04:01;HLA-C07:01;HLA-C07:02;HLA-C14:02;HLA-C14:03	0.774941235	0.789553698	0.742190818	False
orf1ab polyprotein	6567	6575	ICAPLTVFF	HLA-A23:01;HLA-A24:02;HLA-A29:02;HLA-B15:01;HLA-B15:03;HLA-B35:01;HLA-B38:01;HLA-B44:02;HLA-B53:01;HLA-B57:01;HLA-B57:03;HLA-B58:01;HLA-C02:02;HLA-C04:01;HLA-C06:02;HLA-C12:02;HLA-C17:01	0.803696453	0.785354392	0.704483297	False
orf1a polyprotein;orf1ab polyprotein	3053	3060	VAIVVTCL	HLA-B08:01;HLA-B51:01;HLA-C03:02;HLA-C03:03;HLA-C03:04;HLA-C04:01;HLA-C05:01;HLA-C08:01;HLA-C08:02;HLA-C12:02;HLA-C12:03;HLA-C14:03;HLA-C17:01	0.771317206	0.783356076	0.744113124	False
orf1ab polyprotein	4726	4733	FVDGVPFV	HLA-A01:01;HLA-A02:01;HLA-A02:07;HLA-B51:01;HLA-C02:02;HLA-C04:01;HLA-C05:01;HLA-C08:02;HLA-C17:01	0.821280283	0.86601658	0.530682136	False
orf1a polyprotein;orf1ab polyprotein	3605	3612	FLYENAFL	HLA-A02:01;HLA-A02:03;HLA-A02:04;HLA-A02:07;HLA-C01:02;HLA-C03:02;HLA-C03:04;HLA-C04:01;HLA-C05:01;HLA-C08:02;HLA-C17:01	0.776651563	0.793802819	0.725010544	False
surface glycoprotein	50	58	STQDLFLPF	HLA-A03:01;HLA-A11:01;HLA-A24:02;HLA-A25:01;HLA-A26:01;HLA-A29:02;HLA-A30:01;HLA-A32:01;HLA-B57:01;HLA-B57:03;HLA-C02:02;HLA-C03:02;HLA-C03:03;HLA-C14:03;HLA-C15:02	0.72869943	0.748926577	0.810549251	False
surface glycoprotein	448	456	NYNYLYRLF	HLA-A23:01;HLA-A24:02;HLA-A29:02;HLA-B44:02;HLA-B44:03;HLA-C04:01;HLA-C06:02;HLA-C07:02;HLA-C14:02;HLA-C14:03	0.770436447	0.774004464	0.749964254	False
orf1a polyprotein;orf1ab polyprotein	568	576	TILDGISQY	HLA-A02:04;HLA-A03:01;HLA-A11:01;HLA-A25:01;HLA-A26:01;HLA-A29:02;HLA-A30:01;HLA-A30:02;HLA-A32:01;HLA-A33:03;HLA-A36:01;HLA-A68:01;HLA-B15:01;HLA-B15:03;HLA-B18:01;HLA-B35:01;HLA-B46:01;HLA-C02:02;HLA-C03:02;HLA-C12:02	0.753970733	0.746199143	0.78712963	False
orf1ab polyprotein	6516	6524	KPVPEVKIL	HLA-B07:02;HLA-B35:01;HLA-B35:03;HLA-B42:01;HLA-B48:01;HLA-B51:01;HLA-B53:01;HLA-B58:02;HLA-B81:01;HLA-C06:02;HLA-C07:01;HLA-C07:02;HLA-C12:02	0.787862273	0.816083302	0.66375972	False
orf1ab polyprotein	4516	4523	MADLVYAL	HLA-B08:01;HLA-B35:03;HLA-B37:01;HLA-B51:01;HLA-C03:02;HLA-C03:03;HLA-C03:04;HLA-C04:01;HLA-C05:01;HLA-C08:01;HLA-C08:02;HLA-C12:03;HLA-C17:01	0.774509256	0.791428899	0.712356759	False
orf1a polyprotein;orf1ab polyprotein	2511	2518	KTYERHSL	HLA-A32:01;HLA-B14:02;HLA-B42:01;HLA-B57:03;HLA-B58:01;HLA-B58:02;HLA-C03:02;HLA-C03:03;HLA-C03:04;HLA-C05:01;HLA-C07:01;HLA-C08:01;HLA-C12:02;HLA-C12:03;HLA-C14:02;HLA-C15:02	0.739811368	0.768339588	0.773176821	False
orf1ab polyprotein	6606	6614	SVGPKQASL	HLA-A02:03;HLA-A02:04;HLA-A02:07;HLA-A25:01;HLA-A26:01;HLA-A32:01;HLA-A68:02;HLA-B07:02;HLA-B08:01;HLA-B15:09;HLA-B42:01;HLA-B46:01;HLA-B48:01;HLA-B81:01;HLA-C02:02;HLA-C03:03;HLA-C03:04;HLA-C07:01;HLA-C08:01;HLA-C17:01	0.778432815	0.809131491	0.679568578	False
nucleocapsid phosphoprotein	345	353	NFKDQVILL	HLA-A23:01;HLA-A24:02;HLA-A30:01;HLA-C04:01;HLA-C06:02;HLA-C07:02;HLA-C12:02;HLA-C12:03;HLA-C14:02;HLA-C14:03	0.74651242	0.736238549	0.791538422	False
orf1a polyprotein;orf1ab polyprotein	3743	3751	NYSGVVTTV	HLA-A02:03;HLA-A23:01;HLA-A24:02;HLA-A68:02;HLA-B13:02;HLA-B15:09;HLA-B39:01;HLA-C04:01;HLA-C06:02;HLA-C07:02;HLA-C12:03;HLA-C14:02;HLA-C14:03	0.751306995	0.744086001	0.781420525	False
orf1a polyprotein;orf1ab polyprotein	77	85	RTAPHGHVM	HLA-A26:01;HLA-A30:02;HLA-A31:01;HLA-A32:01;HLA-A36:01;HLA-A74:01;HLA-B15:01;HLA-B42:01;HLA-B57:01;HLA-B57:03;HLA-B58:01;HLA-B58:02;HLA-C02:02;HLA-C03:02;HLA-C03:03;HLA-C03:04;HLA-C07:01;HLA-C12:02;HLA-C12:03;HLA-C15:02	0.766867247	0.78026345	0.726704738	False
orf1a polyprotein;orf1ab polyprotein	3193	3201	LRSDVLLPL	HLA-A02:04;HLA-B14:02;HLA-B27:05;HLA-B38:01;HLA-B39:01;HLA-C03:02;HLA-C03:04;HLA-C06:02;HLA-C07:01;HLA-C07:02;HLA-C08:01	0.747155863	0.789652467	0.733828283	False
orf1a polyprotein;orf1ab polyprotein	2787	2795	FYLITPVHV	HLA-A02:01;HLA-A02:04;HLA-A24:02;HLA-B51:01;HLA-B54:01;HLA-C04:01;HLA-C06:02;HLA-C14:02;HLA-C14:03	0.758036047	0.783432278	0.731583892	False
orf1ab polyprotein	6532	6540	AANTVIWDY	HLA-A29:02;HLA-A30:02;HLA-A36:01;HLA-B15:01;HLA-B15:03;HLA-B35:01;HLA-B46:01;HLA-B53:01;HLA-B57:01;HLA-B58:01;HLA-C02:02;HLA-C03:02;HLA-C07:01;HLA-C07:02;HLA-C12:02;HLA-C12:03	0.770520188	0.783085736	0.716094641	False
nucleocapsid phosphoprotein	399	407	DLDDFSKQL	HLA-A01:01;HLA-A02:01;HLA-A02:07;HLA-A25:01;HLA-A26:01;HLA-B39:01;HLA-C04:01;HLA-C05:01;HLA-C08:02	0.802662614	0.865988007	0.523635828	False
orf1ab polyprotein	4758	4766	LSFKELLVY	HLA-A01:01;HLA-A29:02;HLA-A30:02;HLA-A32:01;HLA-A36:01;HLA-B15:01;HLA-B15:03;HLA-B35:01;HLA-B46:01;HLA-B53:01;HLA-B57:01;HLA-B57:03;HLA-B58:01;HLA-B58:02;HLA-C02:02;HLA-C03:02;HLA-C07:01;HLA-C12:02;HLA-C12:03;HLA-C15:02	0.784144539	0.798363024	0.6764251	False
orf1a polyprotein;orf1ab polyprotein	2109	2117	KPNELSRVL	HLA-A32:01;HLA-B07:02;HLA-B35:01;HLA-B35:03;HLA-B42:01;HLA-B48:01;HLA-B53:01;HLA-B55:01;HLA-B58:02;HLA-B81:01;HLA-C06:02;HLA-C07:01;HLA-C07:02;HLA-C15:02	0.78783224	0.819900503	0.630145869	False
ORF8 protein	5	13	VFLGIITTV	HLA-A02:01;HLA-A02:03;HLA-A02:04;HLA-A23:01;HLA-A24:02;HLA-B13:02;HLA-B51:01;HLA-B52:01;HLA-B55:01;HLA-C04:01;HLA-C14:02;HLA-C14:03	0.757962642	0.77180769	0.734568736	False
orf1ab polyprotein	6709	6717	RFKESPFEL	HLA-A23:01;HLA-A24:02;HLA-A30:01;HLA-A32:01;HLA-B42:01;HLA-B58:02;HLA-B81:01;HLA-C04:01;HLA-C07:01;HLA-C07:02;HLA-C14:02;HLA-C14:03	0.773242185	0.767400089	0.723696251	False
nucleocapsid phosphoprotein	78	86	SSPDDQIGY	HLA-A01:01;HLA-A11:01;HLA-A25:01;HLA-A26:01;HLA-A29:02;HLA-A30:01;HLA-A30:02;HLA-A36:01;HLA-B15:01;HLA-B15:03;HLA-B46:01;HLA-B57:01;HLA-B57:03;HLA-B58:01;HLA-C02:02;HLA-C07:02	0.742792758	0.767282569	0.752927467	False
orf1a polyprotein;orf1ab polyprotein	3115	3123	YLTNDVSFL	HLA-A02:01;HLA-A02:03;HLA-A02:04;HLA-A02:07;HLA-B48:01;HLA-C01:02;HLA-C03:04;HLA-C04:01;HLA-C06:02;HLA-C17:01	0.756326513	0.768649903	0.73302457	False
orf1a polyprotein;orf1ab polyprotein	1271	1279	VSDIDITFL	HLA-A01:01;HLA-A02:07;HLA-A36:01;HLA-B38:01;HLA-B57:03;HLA-C02:02;HLA-C03:03;HLA-C03:04;HLA-C04:01;HLA-C05:01;HLA-C08:01;HLA-C08:02;HLA-C15:02;HLA-C17:01	0.781282096	0.790505575	0.669058085	False
orf1ab polyprotein	6682	6690	YAFEHIVYG	HLA-A02:03;HLA-A68:02;HLA-B35:01;HLA-B35:03;HLA-B46:01;HLA-B51:01;HLA-B53:01;HLA-B54:01;HLA-C02:02;HLA-C03:02;HLA-C03:03;HLA-C03:04;HLA-C06:02;HLA-C08:01;HLA-C12:02;HLA-C12:03;HLA-C15:02;HLA-C17:01	0.711030551	0.681422674	0.837089599	False
orf1ab polyprotein	5269	5276	YADVFHLY	HLA-A01:01;HLA-A29:02;HLA-A36:01;HLA-B35:01;HLA-B51:01;HLA-B53:01;HLA-B58:01;HLA-C02:02;HLA-C03:02;HLA-C03:03;HLA-C04:01;HLA-C05:01;HLA-C08:02;HLA-C12:03	0.794254085	0.806178768	0.628949086	False
orf1a polyprotein;orf1ab polyprotein	2703	2711	VAKSHNIAL	HLA-B08:01;HLA-B35:03;HLA-B42:01;HLA-B46:01;HLA-B81:01;HLA-C01:02;HLA-C02:02;HLA-C03:02;HLA-C03:03;HLA-C03:04;HLA-C05:01;HLA-C08:01;HLA-C08:02;HLA-C12:02;HLA-C12:03;HLA-C17:01	0.721077628	0.734102587	0.793557981	False
orf1a polyprotein;orf1ab polyprotein	3943	3951	AIASEFSSL	HLA-A02:03;HLA-A02:04;HLA-A03:01;HLA-A25:01;HLA-A26:01;HLA-A32:01;HLA-B07:02;HLA-B15:01;HLA-B15:09;HLA-B42:01;HLA-B46:01;HLA-B48:01;HLA-B81:01;HLA-C01:02;HLA-C02:02;HLA-C03:03;HLA-C03:04;HLA-C08:01;HLA-C17:01	0.736218426	0.763309123	0.756569211	False
nucleocapsid phosphoprotein	222	230	LLLDRLNQL	HLA-A02:01;HLA-A02:03;HLA-A02:04;HLA-A02:07;HLA-A03:01;HLA-A23:01;HLA-A32:01;HLA-B08:01;HLA-B14:02;HLA-C03:02;HLA-C06:02;HLA-C17:01	0.795676371	0.849010839	0.538081922	False
orf1ab polyprotein	6695	6703	SQLGGLHLL	HLA-A02:01;HLA-A02:04;HLA-A23:01;HLA-A30:02;HLA-A32:01;HLA-B13:02;HLA-B14:02;HLA-B15:01;HLA-B15:03;HLA-B15:09;HLA-B27:05;HLA-B38:01;HLA-B39:01;HLA-B44:02;HLA-B48:01;HLA-B81:01;HLA-C02:02;HLA-C06:02;HLA-C15:02	0.804855921	0.842713119	0.51822197	False
orf1a polyprotein;orf1ab polyprotein	2788	2796	YLITPVHVM	HLA-A02:01;HLA-A02:03;HLA-A02:04;HLA-A02:07;HLA-A25:01;HLA-A26:01;HLA-B15:01;HLA-B15:03;HLA-B15:09;HLA-B35:03;HLA-B46:01;HLA-C03:02;HLA-C03:04;HLA-C08:01;HLA-C12:02;HLA-C12:03;HLA-C14:02;HLA-C14:03	0.701455749	0.741380218	0.79805279	False
ORF3a protein	220	228	STDTGVEHV	HLA-A01:01;HLA-A02:01;HLA-A02:07;HLA-A36:01;HLA-A68:02;HLA-C02:02;HLA-C04:01;HLA-C05:01;HLA-C08:02	0.807881354	0.85497428	0.464353216	False
envelope protein	51	59	LVKPSFYVY	HLA-A01:01;HLA-A25:01;HLA-A26:01;HLA-A29:02;HLA-A30:01;HLA-A30:02;HLA-A32:01;HLA-A36:01;HLA-B15:01;HLA-B35:01;HLA-B46:01;HLA-B57:01;HLA-C02:02;HLA-C03:02;HLA-C07:02;HLA-C12:02	0.748307807	0.783366864	0.696936783	False
ORF7b	21	29	VLIMLIIFW	HLA-A02:01;HLA-A02:03;HLA-A02:04;HLA-A02:07;HLA-A03:01;HLA-A24:02;HLA-A29:02;HLA-C12:02;HLA-C17:01	0.752066784	0.811833045	0.650033524	False
orf1a polyprotein;orf1ab polyprotein	2382	2390	RMYIFFASF	HLA-A03:01;HLA-A23:01;HLA-A24:02;HLA-A29:02;HLA-A30:02;HLA-A32:01;HLA-B15:01;HLA-B15:03;HLA-B37:01;HLA-B46:01;HLA-B52:01;HLA-B57:01;HLA-B57:03;HLA-B58:01;HLA-C03:02;HLA-C07:01;HLA-C14:03	0.751171492	0.760313084	0.714952725	False
ORF6 protein	28	36	NLDYIINLI	HLA-A01:01;HLA-A02:01;HLA-A02:07;HLA-B13:02;HLA-B38:01;HLA-B53:01;HLA-C04:01;HLA-C05:01;HLA-C08:02	0.795250401	0.851073184	0.489748771	False
orf1ab polyprotein	6689	6697	YGDFSHSQL	HLA-A01:01;HLA-B15:09;HLA-B38:01;HLA-C01:02;HLA-C03:03;HLA-C03:04;HLA-C04:01;HLA-C05:01;HLA-C08:01;HLA-C08:02	0.737959011	0.76486561	0.720488125	False
orf1a polyprotein;orf1ab polyprotein	844	852	ELDERIDKV	HLA-A01:01;HLA-A02:01;HLA-A02:03;HLA-A02:04;HLA-A02:07;HLA-A26:01;HLA-A68:02;HLA-B08:01;HLA-B13:02;HLA-C05:01	0.773219062	0.854877915	0.503468346	False
orf1a polyprotein;orf1ab polyprotein	1598	1607	YLDGADVTKI	HLA-A01:01;HLA-A02:01;HLA-A02:03;HLA-A02:07;HLA-B13:02;HLA-C04:01;HLA-C05:01;HLA-C08:02	0.780285437	0.843106352	0.523534859	False
membrane glycoprotein	213	221	SSDNIALLV	HLA-A01:01;HLA-A02:07;HLA-A36:01;HLA-A68:02;HLA-B13:02;HLA-C02:02;HLA-C04:01;HLA-C05:01;HLA-C06:02;HLA-C08:02;HLA-C12:02;HLA-C12:03;HLA-C15:02	0.780381553	0.802158733	0.599411009	False
nucleocapsid phosphoprotein	331	339	LTYTGAIKL	HLA-A30:01;HLA-A68:02;HLA-B51:01;HLA-B57:01;HLA-B57:03;HLA-B58:02;HLA-C02:02;HLA-C03:03;HLA-C03:04;HLA-C05:01;HLA-C06:02;HLA-C08:02;HLA-C12:02;HLA-C12:03;HLA-C15:02;HLA-C17:01	0.766352913	0.783555256	0.647730335	False
orf1ab polyprotein	6750	6757	LLDDFVEI	HLA-A01:01;HLA-A02:01;HLA-A02:07;HLA-C04:01;HLA-C05:01;HLA-C08:01;HLA-C08:02	0.775267919	0.834494759	0.550310386	False
nucleocapsid phosphoprotein	338	346	KLDDKDPNF	HLA-A02:01;HLA-A02:07;HLA-A24:02;HLA-A32:01;HLA-A36:01;HLA-B58:01;HLA-C04:01;HLA-C05:01	0.74724093	0.780704954	0.672989882	False
orf1a polyprotein;orf1ab polyprotein	1000	1008	TTIQTIVEV	HLA-A02:01;HLA-A02:03;HLA-A02:04;HLA-A25:01;HLA-A26:01;HLA-A30:01;HLA-A68:01;HLA-A68:02;HLA-B13:02;HLA-B15:09;HLA-B39:01;HLA-B52:01;HLA-C02:02;HLA-C06:02;HLA-C12:02;HLA-C12:03;HLA-C15:02	0.760065627	0.78809507	0.644994345	False
orf1a polyprotein;orf1ab polyprotein	3583	3591	LLLTILTSL	HLA-A02:01;HLA-A02:03;HLA-A02:04;HLA-A02:07;HLA-A03:01;HLA-A23:01;HLA-A32:01;HLA-B08:01;HLA-B48:01;HLA-B81:01;HLA-C01:02;HLA-C03:02;HLA-C17:01	0.762417013	0.814099397	0.62338004	False
ORF10 protein	9	16	FPFTIYSL	HLA-B07:02;HLA-B08:01;HLA-B14:02;HLA-B35:01;HLA-B35:03;HLA-B42:01;HLA-B51:01;HLA-B53:01;HLA-B54:01;HLA-B81:01;HLA-C03:04;HLA-C07:02	0.760524498	0.79998533	0.627225794	False
orf1a polyprotein;orf1ab polyprotein	3633	3641	HAFLCLFLL	HLA-A68:02;HLA-B35:01;HLA-B35:03;HLA-B48:01;HLA-B51:01;HLA-B54:01;HLA-B57:03;HLA-C02:02;HLA-C03:02;HLA-C03:03;HLA-C03:04;HLA-C06:02;HLA-C08:01;HLA-C12:02;HLA-C12:03;HLA-C15:02;HLA-C17:01	0.701162891	0.679672482	0.807138438	False
orf1a polyprotein;orf1ab polyprotein	23	31	VRDVLVRGF	HLA-B27:05;HLA-B38:01;HLA-B53:01;HLA-B57:01;HLA-C04:01;HLA-C06:02;HLA-C07:01;HLA-C07:02	0.778512616	0.807719907	0.582090241	False
orf1a polyprotein;orf1ab polyprotein	3809	3817	GVYDYLVST	HLA-A02:01;HLA-A02:03;HLA-A02:04;HLA-A03:01;HLA-A11:01;HLA-A25:01;HLA-A31:01;HLA-B13:02;HLA-B46:01;HLA-B48:01	0.72490465	0.798508814	0.675957795	False
orf1a polyprotein;orf1ab polyprotein	2785	2793	AIFYLITPV	HLA-A02:01;HLA-A02:03;HLA-A02:04;HLA-A02:07;HLA-A03:01;HLA-A11:01;HLA-A30:01;HLA-A68:02;HLA-B13:02;HLA-C12:02	0.728730625	0.783704679	0.68224497	False
orf1a polyprotein;orf1ab polyprotein	1026	1034	NSFSGYLKL	HLA-A25:01;HLA-A26:01;HLA-A30:01;HLA-A32:01;HLA-A68:02;HLA-B13:02;HLA-B14:02;HLA-B39:01;HLA-B53:01;HLA-B57:03;HLA-B58:01;HLA-B58:02;HLA-C02:02;HLA-C03:03;HLA-C03:04;HLA-C06:02;HLA-C08:01;HLA-C12:02;HLA-C12:03;HLA-C15:02;HLA-C17:01	0.733432945	0.709138701	0.752566621	False
orf1a polyprotein;orf1ab polyprotein	3666	3674	WLDMVDTSL	HLA-A01:01;HLA-A02:01;HLA-A02:07;HLA-B35:03;HLA-C04:01;HLA-C05:01;HLA-C08:02;HLA-C17:01	0.785885159	0.842389276	0.486579035	False
orf1ab polyprotein	6827	6834	NYGDSATL	HLA-A23:01;HLA-A24:02;HLA-B39:01;HLA-C04:01;HLA-C07:01;HLA-C07:02;HLA-C14:02;HLA-C14:03	0.740716593	0.747174661	0.706878576	False
orf1a polyprotein;orf1ab polyprotein	2350	2358	FFSYFAVHF	HLA-A23:01;HLA-A24:02;HLA-A29:02;HLA-B35:01;HLA-C02:02;HLA-C03:02;HLA-C04:01;HLA-C07:02;HLA-C12:02;HLA-C14:02;HLA-C14:03	0.719650051	0.689066621	0.776563009	False
orf1ab polyprotein	6213	6221	KRVDWTIEY	HLA-A29:02;HLA-A30:02;HLA-A32:01;HLA-A36:01;HLA-B15:01;HLA-B15:03;HLA-B27:05;HLA-B46:01;HLA-C02:02;HLA-C06:02;HLA-C07:01;HLA-C07:02;HLA-C12:02	0.759104804	0.79438322	0.617287358	False
surface glycoprotein	829	837	ADAGFIKQY	HLA-A25:01;HLA-A26:01;HLA-A30:02;HLA-A32:01;HLA-B15:01;HLA-B15:03;HLA-B18:01;HLA-B44:02;HLA-B44:03;HLA-B46:01;HLA-C02:02;HLA-C06:02;HLA-C07:01;HLA-C12:02;HLA-C12:03	0.769498334	0.80772579	0.572738673	False
orf1a polyprotein;orf1ab polyprotein	3040	3048	ALDISASIV	HLA-A01:01;HLA-A02:01;HLA-A02:07;HLA-A36:01;HLA-B13:02;HLA-B15:09;HLA-C04:01;HLA-C05:01;HLA-C08:02	0.781386016	0.843141729	0.484081287	False
orf1ab polyprotein	4667	4674	FTEERLKL	HLA-A01:01;HLA-C03:02;HLA-C03:03;HLA-C03:04;HLA-C04:01;HLA-C05:01;HLA-C08:02;HLA-C12:03;HLA-C15:02	0.748971445	0.785792372	0.631354341	False
orf1ab polyprotein	4429	4437	IYNDKVAGF	HLA-A23:01;HLA-A24:02;HLA-A26:01;HLA-A29:02;HLA-B15:01;HLA-B46:01;HLA-C02:02;HLA-C04:01;HLA-C07:02;HLA-C14:02;HLA-C14:03	0.720373324	0.706658299	0.753956955	False
orf1ab polyprotein	4621	4629	SGVPVVDSY	HLA-A26:01;HLA-A29:02;HLA-A30:02;HLA-B15:01;HLA-B15:03;HLA-B18:01;HLA-B35:01;HLA-B46:01;HLA-B53:01;HLA-B57:01;HLA-B58:01;HLA-C07:01;HLA-C07:02;HLA-C12:02	0.741560173	0.759879394	0.675950945	False
orf1a polyprotein;orf1ab polyprotein	1133	1141	SAYENFNQH	HLA-A03:01;HLA-A11:01;HLA-A25:01;HLA-A26:01;HLA-A68:01;HLA-B46:01;HLA-B53:01;HLA-C02:02;HLA-C03:02;HLA-C03:03;HLA-C03:04;HLA-C08:01;HLA-C12:02;HLA-C12:03	0.682729742	0.692270794	0.795771979	False
orf1ab polyprotein	6942	6950	DSKEGFFTY	HLA-A01:01;HLA-A25:01;HLA-A26:01;HLA-A30:01;HLA-A30:02;HLA-A32:01;HLA-A33:03;HLA-A36:01;HLA-B15:01;HLA-B18:01;HLA-B46:01;HLA-B53:01;HLA-B57:01;HLA-B57:03;HLA-B58:02;HLA-C02:02;HLA-C07:01;HLA-C12:03	0.764816386	0.79080624	0.59982137	False
orf1a polyprotein;orf1ab polyprotein	634	641	KFKEGVEF	HLA-A23:01;HLA-A24:02;HLA-B08:01;HLA-B15:01;HLA-B15:03;HLA-B42:01;HLA-B46:01;HLA-B57:03;HLA-B58:02;HLA-B81:01;HLA-C04:01;HLA-C07:02;HLA-C14:02;HLA-C14:03	0.727686553	0.718964178	0.735190561	False
envelope protein	11	19	TLIVNSVLL	HLA-A02:01;HLA-A02:04;HLA-A02:07;HLA-A23:01;HLA-A24:02;HLA-B15:01;HLA-B15:09;HLA-B38:01;HLA-B48:01;HLA-C04:01;HLA-C17:01	0.747644642	0.764128908	0.658557839	False
surface glycoprotein	635	643	VYSTGSNVF	HLA-A23:01;HLA-A24:02;HLA-B57:03;HLA-C04:01;HLA-C07:01;HLA-C07:02;HLA-C14:02;HLA-C14:03	0.73900245	0.742450949	0.69892319	False
ORF6 protein	3	11	HLVDFQVTI	HLA-A02:01;HLA-A02:03;HLA-A02:04;HLA-A02:07;HLA-A23:01;HLA-A25:01;HLA-A32:01;HLA-A68:02;HLA-B13:02;HLA-B15:01;HLA-B35:03;HLA-B38:01;HLA-B39:01;HLA-B48:01;HLA-B49:01;HLA-B52:01;HLA-B53:01;HLA-B57:03;HLA-C06:02;HLA-C12:02	0.756471294	0.779439887	0.628885635	False
membrane glycoprotein	112	119	FNPETNIL	HLA-C01:02;HLA-C03:02;HLA-C04:01;HLA-C06:02;HLA-C07:02;HLA-C08:01;HLA-C14:02;HLA-C14:03	0.655445229	0.628850992	0.858104644	False
nucleocapsid phosphoprotein	154	161	NAAIVLQL	HLA-B08:01;HLA-B14:02;HLA-B35:01;HLA-B39:01;HLA-B51:01;HLA-C03:02;HLA-C03:03;HLA-C03:04;HLA-C06:02;HLA-C08:01;HLA-C12:02;HLA-C12:03;HLA-C17:01	0.709157475	0.734790353	0.739366214	False
surface glycoprotein	691	699	SIIAYTMSL	HLA-A02:03;HLA-A02:04;HLA-A02:07;HLA-A25:01;HLA-A32:01;HLA-B07:02;HLA-B15:09;HLA-B46:01;HLA-C01:02;HLA-C02:02;HLA-C03:02;HLA-C03:03;HLA-C03:04;HLA-C08:01;HLA-C12:02;HLA-C14:02;HLA-C14:03;HLA-C15:02;HLA-C17:01	0.634381201	0.625882022	0.869477354	False
surface glycoprotein	1181	1189	KEIDRLNEV	HLA-A02:01;HLA-A02:03;HLA-A02:04;HLA-B13:02;HLA-B14:02;HLA-B18:01;HLA-B37:01;HLA-B40:01;HLA-B40:02;HLA-B41:01;HLA-B45:01;HLA-B49:01;HLA-B50:01;HLA-B52:01;HLA-C06:02;HLA-C12:02;HLA-C15:02	0.731025353	0.768513746	0.66348691	False
orf1ab polyprotein	5863	5870	SEYDYVIF	HLA-B14:02;HLA-B15:03;HLA-B18:01;HLA-B37:01;HLA-B40:01;HLA-B40:02;HLA-B41:01;HLA-B44:02;HLA-B44:03;HLA-B46:01;HLA-B49:01;HLA-C07:01;HLA-C07:02	0.740254139	0.780720922	0.627764735	False
orf1a polyprotein;orf1ab polyprotein	3548	3557	ALLEDEFTPF	HLA-A02:01;HLA-A03:01;HLA-A24:02;HLA-A29:02;HLA-A32:01	0.758284211	0.83230156	0.533961671	False
orf1ab polyprotein	5291	5299	MLDMYSVML	HLA-A01:01;HLA-A02:01;HLA-A02:07;HLA-C04:01;HLA-C05:01;HLA-C08:02;HLA-C17:01	0.779643605	0.837344398	0.460963143	False
orf1a polyprotein;orf1ab polyprotein	3294	3301	WLDDVVYC	HLA-A01:01;HLA-A02:01;HLA-A02:07;HLA-C04:01;HLA-C05:01;HLA-C08:02;HLA-C17:01	0.779643605	0.837344398	0.460963143	False
surface glycoprotein	996	1004	LITGRLQSL	HLA-A02:03;HLA-A02:04;HLA-A02:07;HLA-A25:01;HLA-B08:01;HLA-B14:02;HLA-B35:03;HLA-B42:01;HLA-B46:01;HLA-B81:01;HLA-C01:02;HLA-C02:02;HLA-C03:02;HLA-C03:03;HLA-C03:04;HLA-C06:02;HLA-C12:02;HLA-C17:01	0.682110924	0.689278744	0.78429638	False
orf1ab polyprotein	6161	6169	VYNPFMIDV	HLA-A23:01;HLA-A24:02;HLA-C04:01;HLA-C06:02;HLA-C07:02;HLA-C14:02;HLA-C14:03;HLA-C15:02	0.702836778	0.689844563	0.763007415	False
orf1a polyprotein;orf1ab polyprotein	3104	3112	VYSVIYLYL	HLA-A23:01;HLA-A24:02;HLA-C04:01;HLA-C06:02;HLA-C07:02;HLA-C14:02;HLA-C14:03;HLA-C15:02	0.702836778	0.689844563	0.763007415	False
orf1ab polyprotein	6109	6117	VLWAHGFEL	HLA-A02:01;HLA-A02:04;HLA-A02:07;HLA-A32:01;HLA-B42:01;HLA-C01:02;HLA-C03:02;HLA-C03:04;HLA-C05:01;HLA-C08:01;HLA-C08:02;HLA-C17:01	0.713184578	0.745283494	0.711753836	False
orf1ab polyprotein	6493	6501	ELFENKTTL	HLA-A02:01;HLA-A02:03;HLA-A02:04;HLA-A02:07;HLA-A23:01;HLA-A25:01;HLA-A26:01;HLA-A32:01;HLA-A68:02;HLA-B08:01;HLA-B13:02;HLA-B14:02;HLA-B15:01;HLA-B38:01;HLA-B39:01;HLA-B48:01;HLA-B81:01	0.760960306	0.814765638	0.529151661	False
ORF7a protein	101	109	FLIVAAIVF	HLA-A24:02;HLA-A29:02;HLA-B15:01;HLA-B35:01;HLA-B46:01;HLA-C03:02;HLA-C03:04;HLA-C04:01;HLA-C08:02;HLA-C12:02;HLA-C14:02;HLA-C14:03;HLA-C17:01	0.696950193	0.669963367	0.779887637	False
orf1a polyprotein;orf1ab polyprotein	613	621	LTNIFGTVY	HLA-A01:01;HLA-A03:01;HLA-A29:02;HLA-A30:02;HLA-A36:01;HLA-B15:01;HLA-B35:01;HLA-B46:01;HLA-B57:01;HLA-B57:03;HLA-B58:02;HLA-C02:02;HLA-C03:02;HLA-C07:01	0.769766645	0.817004411	0.513415383	False
orf1ab polyprotein	5150	5158	LSDDAVVCF	HLA-A01:01;HLA-A02:07;HLA-A36:01;HLA-B38:01;HLA-B53:01;HLA-B57:01;HLA-B57:03;HLA-B58:01;HLA-C02:02;HLA-C03:03;HLA-C04:01;HLA-C05:01;HLA-C08:02;HLA-C12:02;HLA-C12:03;HLA-C17:01	0.768410708	0.780143723	0.582303847	False
orf1a polyprotein;orf1ab polyprotein	3105	3112	YSVIYLYL	HLA-A01:01;HLA-B58:02;HLA-C03:02;HLA-C03:03;HLA-C03:04;HLA-C07:01;HLA-C08:01;HLA-C12:02;HLA-C12:03;HLA-C15:02;HLA-C17:01	0.705233266	0.743433702	0.709610543	False
orf1ab polyprotein	5359	5367	ISTSHKLVL	HLA-B57:03;HLA-B58:01;HLA-B58:02;HLA-C02:02;HLA-C03:02;HLA-C03:03;HLA-C03:04;HLA-C07:01;HLA-C08:01;HLA-C08:02;HLA-C12:02;HLA-C12:03;HLA-C15:02;HLA-C17:01	0.716549772	0.716039809	0.721726224	False
orf1a polyprotein;orf1ab polyprotein	2105	2113	LTIKKPNEL	HLA-A23:01;HLA-A32:01;HLA-A68:02;HLA-B08:01;HLA-B57:03;HLA-B58:02;HLA-C02:02;HLA-C03:02;HLA-C03:03;HLA-C03:04;HLA-C06:02;HLA-C08:01;HLA-C12:02;HLA-C12:03;HLA-C15:02;HLA-C17:01	0.718633128	0.714368173	0.72907146	False
orf1a polyprotein;orf1ab polyprotein	4261	4269	PANSTVLSF	HLA-A24:02;HLA-B35:01;HLA-B35:03;HLA-B46:01;HLA-B53:01;HLA-B57:01;HLA-B58:01;HLA-C02:02;HLA-C03:02;HLA-C03:03;HLA-C07:01;HLA-C12:02;HLA-C12:03;HLA-C17:01	0.70587247	0.704992466	0.746407387	False
orf1a polyprotein;orf1ab polyprotein	2810	2818	KAIDGGVTR	HLA-A11:01;HLA-A30:01;HLA-A31:01;HLA-A33:03;HLA-A68:01;HLA-A74:01;HLA-B15:03;HLA-B46:01;HLA-B48:01;HLA-B53:01;HLA-B57:01;HLA-B57:03;HLA-B58:01;HLA-B58:02;HLA-C02:02;HLA-C03:03;HLA-C03:04;HLA-C08:01;HLA-C12:02;HLA-C12:03	0.655854441	0.586201665	0.84819274	False
orf1a polyprotein;orf1ab polyprotein	1182	1190	LYDKLVSSF	HLA-A23:01;HLA-A24:02;HLA-A29:02;HLA-B53:01;HLA-C04:01;HLA-C05:01;HLA-C07:02;HLA-C08:02;HLA-C14:02;HLA-C14:03	0.737780734	0.730754233	0.676400797	False
orf1ab polyprotein	5357	5365	HVISTSHKL	HLA-A02:07;HLA-A23:01;HLA-A25:01;HLA-A26:01;HLA-A30:01;HLA-A30:02;HLA-A32:01;HLA-A68:02;HLA-B13:02;HLA-B15:09;HLA-B35:03;HLA-B38:01;HLA-B39:01;HLA-B40:02;HLA-B42:01;HLA-B48:01;HLA-B53:01;HLA-B57:03;HLA-B58:01;HLA-B58:02;HLA-C02:02;HLA-C03:03;HLA-C03:04;HLA-C05:01;HLA-C08:01;HLA-C15:02;HLA-C17:01	0.73409689	0.684682344	0.724257617	False
orf1a polyprotein;orf1ab polyprotein	376	384	SEVGPEHSL	HLA-B15:09;HLA-B18:01;HLA-B35:03;HLA-B37:01;HLA-B38:01;HLA-B39:01;HLA-B40:01;HLA-B40:02;HLA-B41:01;HLA-B44:02;HLA-B44:03;HLA-B45:01;HLA-B48:01;HLA-B49:01;HLA-B50:01;HLA-B81:01;HLA-C03:04;HLA-C07:01;HLA-C08:01	0.727148931	0.756198277	0.65344733	False
orf1ab polyprotein	6749	6757	LLLDDFVEI	HLA-A02:01;HLA-A02:03;HLA-A02:04;HLA-A02:07;HLA-A23:01;HLA-A24:02;HLA-A32:01;HLA-B13:02;HLA-B51:01;HLA-B53:01;HLA-C08:01	0.703154732	0.723155226	0.717655104	False
surface glycoprotein	417	425	KIADYNYKL	HLA-A02:01;HLA-A02:03;HLA-A02:04;HLA-A02:07;HLA-A23:01;HLA-A32:01;HLA-A68:02;HLA-B13:02;HLA-B48:01;HLA-B57:03;HLA-B58:01;HLA-C02:02;HLA-C07:02;HLA-C15:02	0.731575622	0.752413317	0.656387249	False
orf1a polyprotein;orf1ab polyprotein	3946	3954	SEFSSLPSY	HLA-A03:01;HLA-A26:01;HLA-A29:02;HLA-A30:02;HLA-A32:01;HLA-B15:01;HLA-B15:03;HLA-B18:01;HLA-B35:01;HLA-B40:01;HLA-B40:02;HLA-B41:01;HLA-B44:02;HLA-B44:03;HLA-B49:01;HLA-B50:01	0.761178892	0.796894929	0.536087223	False
orf1a polyprotein;orf1ab polyprotein	1947	1955	YKKPASREL	HLA-B15:03;HLA-B42:01;HLA-B46:01;HLA-B48:01;HLA-C02:02;HLA-C03:02;HLA-C03:03;HLA-C03:04;HLA-C06:02;HLA-C07:02;HLA-C12:03	0.69417752	0.717194669	0.728248879	False
ORF7b	9	17	FYLCFLAFL	HLA-A02:04;HLA-A23:01;HLA-A24:02;HLA-C03:02;HLA-C04:01;HLA-C06:02;HLA-C07:02;HLA-C14:02;HLA-C14:03	0.690251489	0.67248696	0.768351413	False
orf1ab polyprotein	4986	4994	FYGGWHNML	HLA-A23:01;HLA-A24:02;HLA-B14:02;HLA-C04:01;HLA-C06:02;HLA-C07:02;HLA-C14:02;HLA-C14:03;HLA-C17:01	0.717353424	0.697444937	0.723781009	False
orf1ab polyprotein	5316	5323	MYTPHTVL	HLA-A23:01;HLA-A24:02;HLA-B14:02;HLA-C03:04;HLA-C04:01;HLA-C07:02;HLA-C14:02;HLA-C14:03;HLA-C17:01	0.709815349	0.686979207	0.739258437	False
orf1a polyprotein;orf1ab polyprotein	1536	1544	YYTSNPTTF	HLA-A23:01;HLA-A24:02;HLA-A29:02;HLA-B15:03;HLA-B53:01;HLA-C02:02;HLA-C03:03;HLA-C04:01;HLA-C07:02;HLA-C14:02;HLA-C14:03	0.726105703	0.696047903	0.714046451	False
orf1a polyprotein;orf1ab polyprotein	2937	2945	NVLEGSVAY	HLA-A03:01;HLA-A11:01;HLA-A25:01;HLA-A26:01;HLA-A29:02;HLA-A30:01;HLA-A30:02;HLA-A32:01;HLA-B15:01;HLA-B15:03;HLA-B18:01;HLA-B35:01;HLA-B46:01;HLA-B53:01;HLA-B58:01;HLA-C14:02;HLA-C14:03	0.710516087	0.708917762	0.714610047	False
orf1ab polyprotein	4667	4675	FTEERLKLF	HLA-A01:01;HLA-A25:01;HLA-A26:01;HLA-A29:02;HLA-B57:01;HLA-C02:02;HLA-C03:02;HLA-C03:03;HLA-C04:01;HLA-C05:01;HLA-C12:02;HLA-C12:03	0.741469189	0.781001737	0.580696366	False
orf1ab polyprotein	5556	5564	VMPLSAPTL	HLA-A02:07;HLA-A24:02;HLA-B51:01;HLA-C01:02;HLA-C04:01;HLA-C07:02;HLA-C14:02;HLA-C14:03	0.644399264	0.62371404	0.824186637	False
orf1ab polyprotein	4629	4637	YYSLLMPIL	HLA-A24:02;HLA-B15:09;HLA-C04:01;HLA-C06:02;HLA-C07:02;HLA-C08:01;HLA-C14:02;HLA-C14:03	0.670376268	0.658572141	0.785182351	False
ORF10 protein	27	35	IAQVDVVNF	HLA-A24:02;HLA-B15:01;HLA-B35:01;HLA-B35:03;HLA-B46:01;HLA-B53:01;HLA-B57:01;HLA-B57:03;HLA-B58:01;HLA-C02:02;HLA-C03:02;HLA-C03:03;HLA-C05:01;HLA-C12:02;HLA-C12:03;HLA-C17:01	0.68769202	0.688809982	0.749637074	False
ORF3a protein	79	86	FVCNLLLL	HLA-C02:02;HLA-C03:02;HLA-C03:03;HLA-C03:04;HLA-C04:01;HLA-C06:02;HLA-C08:01;HLA-C08:02;HLA-C15:02;HLA-C17:01	0.716969584	0.684054832	0.724248986	False
orf1a polyprotein;orf1ab polyprotein	1676	1683	LATALLTL	HLA-B08:01;HLA-B35:01;HLA-B51:01;HLA-B58:02;HLA-B81:01;HLA-C02:02;HLA-C03:02;HLA-C03:03;HLA-C03:04;HLA-C08:01;HLA-C08:02;HLA-C12:02;HLA-C12:03;HLA-C15:02;HLA-C17:01	0.701250569	0.706054704	0.724128136	False
orf1a polyprotein;orf1ab polyprotein	1248	1255	FLTENLLL	HLA-A02:01;HLA-A02:04;HLA-A02:07;HLA-B08:01;HLA-C03:02;HLA-C03:04;HLA-C04:01;HLA-C08:02;HLA-C17:01	0.745977773	0.777719302	0.569700567	False
orf1ab polyprotein	6247	6254	LADKFPVL	HLA-B35:03;HLA-B51:01;HLA-C03:02;HLA-C03:03;HLA-C03:04;HLA-C04:01;HLA-C05:01;HLA-C08:01;HLA-C08:02;HLA-C12:03;HLA-C17:01	0.715462909	0.712847491	0.691700814	False
ORF8 protein	73	81	YIDIGNYTV	HLA-A01:01;HLA-A02:01;HLA-A02:07;HLA-A36:01;HLA-B13:02;HLA-B15:09;HLA-B35:03;HLA-B38:01;HLA-B39:01;HLA-C05:01;HLA-C08:01;HLA-C08:02	0.735112069	0.81608229	0.526486235	False
surface glycoprotein	915	923	VLYENQKLI	HLA-A02:01;HLA-A02:03;HLA-A02:04;HLA-A02:07;HLA-A24:02;HLA-A32:01;HLA-B13:02;HLA-B52:01;HLA-B58:02;HLA-C06:02	0.690839782	0.737745343	0.688959545	False
orf1a polyprotein;orf1ab polyprotein	2017	2025	KPVETSNSF	HLA-A23:01;HLA-A24:02;HLA-A32:01;HLA-B07:02;HLA-B15:01;HLA-B15:03;HLA-B35:01;HLA-B35:03;HLA-B42:01;HLA-B53:01;HLA-B55:01;HLA-B57:03;HLA-B58:01;HLA-B81:01;HLA-C07:01	0.74414812	0.749425517	0.612725444	False
orf1ab polyprotein	5275	5283	LYLQYIRKL	HLA-A02:04;HLA-A23:01;HLA-A24:02;HLA-B58:02;HLA-C06:02;HLA-C07:01;HLA-C07:02;HLA-C14:02;HLA-C14:03	0.702523848	0.730975608	0.684876014	False
envelope protein	21	29	LAFVVFLLV	HLA-A02:07;HLA-A68:02;HLA-B13:02;HLA-B35:01;HLA-B35:03;HLA-B51:01;HLA-B53:01;HLA-B54:01;HLA-C02:02;HLA-C03:02;HLA-C03:04;HLA-C06:02;HLA-C08:01;HLA-C12:02;HLA-C12:03;HLA-C15:02	0.665949561	0.640979524	0.790046761	False
surface glycoprotein	1060	1068	VVFLHVTYV	HLA-A02:01;HLA-A02:03;HLA-A02:04;HLA-A02:07;HLA-A30:01;HLA-A68:02;HLA-B37:01;HLA-B51:01;HLA-B52:01;HLA-C02:02;HLA-C06:02;HLA-C08:01;HLA-C12:02;HLA-C15:02	0.69912939	0.714006062	0.706079676	False
orf1a polyprotein;orf1ab polyprotein	1440	1448	DLNETLVTM	HLA-A02:01;HLA-A02:03;HLA-A02:04;HLA-A02:07;HLA-A25:01;HLA-A26:01;HLA-B08:01;HLA-B15:01;HLA-B35:03;HLA-B53:01;HLA-C04:01	0.737604361	0.785892534	0.549203249	False
orf1a polyprotein;orf1ab polyprotein	2469	2477	VARDLSLQF	HLA-A24:02;HLA-A26:01;HLA-A29:02;HLA-A30:01;HLA-B15:01;HLA-B15:03;HLA-B35:01;HLA-B46:01;HLA-B53:01;HLA-B57:01;HLA-B57:03;HLA-B58:01;HLA-C02:02;HLA-C03:02;HLA-C03:03;HLA-C12:02;HLA-C12:03	0.677179753	0.653173475	0.766316223	False
surface glycoprotein	1136	1145	TVYDPLQPEL	HLA-A02:01;HLA-A02:04;HLA-A02:07;HLA-A03:01;HLA-A30:01;HLA-A68:02;HLA-B15:09;HLA-C03:03;HLA-C03:04;HLA-C08:01	0.730385561	0.783815743	0.589428263	False
ORF10 protein	7	15	FAFPFTIYS	HLA-A68:02;HLA-B35:01;HLA-B46:01;HLA-B51:01;HLA-B54:01;HLA-C02:02;HLA-C03:02;HLA-C03:03;HLA-C03:04;HLA-C06:02;HLA-C08:01;HLA-C12:02;HLA-C12:03;HLA-C17:01	0.665224982	0.648221083	0.779167811	False
envelope protein	21	28	LAFVVFLL	HLA-B08:01;HLA-B35:01;HLA-B51:01;HLA-B58:02;HLA-C03:02;HLA-C03:03;HLA-C03:04;HLA-C06:02;HLA-C08:02;HLA-C12:02;HLA-C12:03;HLA-C17:01	0.708164808	0.736255946	0.656959514	False
orf1ab polyprotein	4774	4781	AASGNLLL	HLA-C02:02;HLA-C03:03;HLA-C03:04;HLA-C05:01;HLA-C06:02;HLA-C08:01;HLA-C08:02;HLA-C12:02;HLA-C12:03;HLA-C15:02;HLA-C17:01	0.707649512	0.730358667	0.661799598	False
orf1a polyprotein;orf1ab polyprotein	751	759	VLTEEVVLK	HLA-A02:01;HLA-A02:04;HLA-A03:01;HLA-A11:01;HLA-A30:01;HLA-A68:01;HLA-A74:01	0.726028311	0.783244575	0.564281192	False
orf1a polyprotein;orf1ab polyprotein	2329	2337	LAYILFTRF	HLA-A29:02;HLA-B15:01;HLA-B15:03;HLA-B35:01;HLA-B35:03;HLA-B46:01;HLA-B51:01;HLA-B53:01;HLA-B54:01;HLA-B57:01;HLA-B57:03;HLA-C02:02;HLA-C03:02;HLA-C03:03;HLA-C03:04;HLA-C12:02;HLA-C12:03;HLA-C17:01	0.689936036	0.677895197	0.722937587	False
orf1a polyprotein;orf1ab polyprotein	3136	3144	VPFWITIAY	HLA-A03:01;HLA-A29:02;HLA-B07:02;HLA-B15:01;HLA-B15:03;HLA-B18:01;HLA-B35:01;HLA-B35:03;HLA-B42:01;HLA-B46:01;HLA-B51:01;HLA-B53:01;HLA-B54:01;HLA-B55:01;HLA-B81:01;HLA-C12:02;HLA-C14:03	0.729137316	0.754079861	0.593515195	False
orf1a polyprotein;orf1ab polyprotein	619	627	TVYEKLKPV	HLA-A02:01;HLA-A02:03;HLA-A02:04;HLA-A02:07;HLA-A25:01;HLA-A26:01;HLA-A68:02;HLA-B08:01;HLA-B42:01;HLA-B46:01;HLA-B52:01;HLA-B55:01;HLA-C06:02;HLA-C12:02	0.705717335	0.757687662	0.61671626	False
ORF7a protein	96	103	LYSPIFLI	HLA-A23:01;HLA-A24:02;HLA-B51:01;HLA-C04:01;HLA-C06:02;HLA-C07:02	0.696178104	0.689213549	0.706877568	False
orf1a polyprotein;orf1ab polyprotein	3687	3694	SAVVLLIL	HLA-B08:01;HLA-B14:02;HLA-B35:01;HLA-B51:01;HLA-C03:02;HLA-C03:03;HLA-C03:04;HLA-C08:01;HLA-C08:02;HLA-C12:02;HLA-C12:03;HLA-C15:02;HLA-C17:01	0.680304222	0.699567373	0.720654776	False
orf1a polyprotein;orf1ab polyprotein	116	123	VAYRKVLL	HLA-B08:01;HLA-B51:01;HLA-B57:03;HLA-B81:01;HLA-C02:02;HLA-C03:02;HLA-C03:03;HLA-C03:04;HLA-C05:01;HLA-C08:01;HLA-C08:02;HLA-C12:02;HLA-C12:03;HLA-C17:01	0.703085187	0.727733969	0.653418177	False
orf1ab polyprotein	5621	5629	LYYPSARIV	HLA-B15:09;HLA-B51:01;HLA-C04:01;HLA-C06:02;HLA-C07:02;HLA-C12:02;HLA-C12:03;HLA-C14:02;HLA-C14:03	0.684046165	0.691677946	0.71012486	False
envelope protein	26	34	FLLVTLAIL	HLA-A02:01;HLA-A02:03;HLA-A02:04;HLA-A02:07;HLA-B08:01;HLA-C03:02;HLA-C03:04;HLA-C04:01;HLA-C17:01	0.720663274	0.754649812	0.596616195	False
orf1ab polyprotein	6902	6909	VSDADSTL	HLA-A01:01;HLA-B58:01;HLA-B58:02;HLA-C03:03;HLA-C03:04;HLA-C04:01;HLA-C05:01;HLA-C08:01;HLA-C08:02;HLA-C17:01	0.722528641	0.737917111	0.617081717	False
nucleocapsid phosphoprotein	266	274	KAYNVTQAF	HLA-A29:02;HLA-A30:02;HLA-A32:01;HLA-B15:01;HLA-B15:03;HLA-B35:01;HLA-B46:01;HLA-B53:01;HLA-B57:01;HLA-B57:03;HLA-B58:01;HLA-B58:02;HLA-B81:01;HLA-C02:02;HLA-C03:02;HLA-C03:03;HLA-C03:04;HLA-C12:02;HLA-C12:03;HLA-C14:02;HLA-C14:03	0.687631696	0.664085049	0.732865246	False
orf1a polyprotein;orf1ab polyprotein	939	947	EEFEPSTQY	HLA-A25:01;HLA-A26:01;HLA-B15:01;HLA-B15:03;HLA-B18:01;HLA-B35:01;HLA-B40:01;HLA-B40:02;HLA-B44:02;HLA-B44:03;HLA-B45:01;HLA-B49:01;HLA-B50:01;HLA-C07:01	0.737836333	0.775666076	0.534160245	False
orf1ab polyprotein	6661	6668	MEIDFLEL	HLA-B14:02;HLA-B18:01;HLA-B37:01;HLA-B39:01;HLA-B40:01;HLA-B40:02;HLA-B44:02;HLA-B44:03;HLA-B49:01;HLA-B50:01;HLA-B52:01;HLA-C03:02;HLA-C03:03;HLA-C03:04;HLA-C08:01;HLA-C15:02	0.665228243	0.687801708	0.737199413	False
orf1a polyprotein;orf1ab polyprotein	1819	1827	GTFTCASEY	HLA-A01:01;HLA-A11:01;HLA-A25:01;HLA-A26:01;HLA-A29:02;HLA-A30:01;HLA-A30:02;HLA-A32:01;HLA-A36:01;HLA-B15:01;HLA-B15:03;HLA-B57:01;HLA-B58:01;HLA-C02:02;HLA-C12:03	0.70082533	0.732529759	0.643670389	False
membrane glycoprotein	111	119	SFNPETNIL	HLA-A23:01;HLA-A24:02;HLA-B15:09;HLA-B35:03;HLA-B38:01;HLA-B39:01;HLA-C04:01;HLA-C06:02;HLA-C07:01;HLA-C14:02;HLA-C14:03	0.715669667	0.716392066	0.653608849	False
orf1ab polyprotein	4926	4934	NVIPTITQM	HLA-A02:03;HLA-A02:07;HLA-A03:01;HLA-A25:01;HLA-A26:01;HLA-A33:03;HLA-A68:01;HLA-A68:02;HLA-B15:01;HLA-B15:09;HLA-B18:01;HLA-B35:01;HLA-B35:03;HLA-B38:01;HLA-B39:01;HLA-B53:01;HLA-C02:02;HLA-C03:03;HLA-C12:02;HLA-C17:01	0.709352573	0.710722077	0.660675941	False
orf1a polyprotein;orf1ab polyprotein	2426	2434	IVNGVRRSF	HLA-A25:01;HLA-A26:01;HLA-A29:02;HLA-A30:02;HLA-A32:01;HLA-B15:01;HLA-B15:03;HLA-B35:01;HLA-B35:03;HLA-B42:01;HLA-B46:01;HLA-B53:01;HLA-B57:01;HLA-B57:03;HLA-B58:01;HLA-B58:02;HLA-C02:02;HLA-C03:02;HLA-C03:03;HLA-C07:01	0.726258785	0.720827152	0.628689911	False
surface glycoprotein	958	966	ALNTLVKQL	HLA-A02:01;HLA-A02:03;HLA-A02:04;HLA-A02:07;HLA-A30:01;HLA-A32:01;HLA-B15:01;HLA-B42:01;HLA-B48:01;HLA-B81:01;HLA-C01:02;HLA-C06:02;HLA-C12:02;HLA-C17:01	0.689971318	0.719101027	0.67797062	False
orf1a polyprotein;orf1ab polyprotein	2345	2353	AIMQLFFSY	HLA-A01:01;HLA-A03:01;HLA-A11:01;HLA-A25:01;HLA-A29:02;HLA-A30:02;HLA-A32:01;HLA-A36:01;HLA-B15:01;HLA-B15:03;HLA-B44:02	0.724616627	0.79635347	0.513396184	False
orf1ab polyprotein	6385	6393	VSDIDYVPL	HLA-A01:01;HLA-B46:01;HLA-B57:03;HLA-C03:03;HLA-C03:04;HLA-C04:01;HLA-C05:01;HLA-C08:01;HLA-C08:02;HLA-C17:01	0.716651088	0.735573467	0.619840076	False
orf1ab polyprotein	5299	5307	LTNDNTSRY	HLA-A01:01;HLA-A03:01;HLA-A25:01;HLA-A26:01;HLA-A29:02;HLA-A30:02;HLA-A32:01;HLA-A36:01;HLA-B15:01;HLA-B46:01;HLA-B53:01;HLA-B57:01;HLA-B58:01;HLA-C02:02;HLA-C12:03	0.739258608	0.791965519	0.51818506	False
nucleocapsid phosphoprotein	332	339	TYTGAIKL	HLA-A23:01;HLA-A24:02;HLA-C04:01;HLA-C06:02;HLA-C07:02;HLA-C14:02;HLA-C14:03	0.682350452	0.670987459	0.721944565	False
orf1a polyprotein;orf1ab polyprotein	2098	2105	AYVDNSSL	HLA-A23:01;HLA-A24:02;HLA-C03:04;HLA-C04:01;HLA-C07:02;HLA-C14:02;HLA-C14:03	0.674117826	0.659726151	0.737491415	False
ORF3a protein	100	108	GLEAPFLYL	HLA-A01:01;HLA-A02:01;HLA-A02:04;HLA-A02:07;HLA-A03:01;HLA-A36:01;HLA-C17:01	0.75239747	0.850982457	0.385715037	False
surface glycoprotein	285	293	ITDAVDCAL	HLA-A01:01;HLA-A02:07;HLA-B35:03;HLA-C03:03;HLA-C03:04;HLA-C04:01;HLA-C05:01;HLA-C08:01;HLA-C08:02	0.704458351	0.738074477	0.624705113	False
surface glycoprotein	584	592	ILDITPCSF	HLA-A01:01;HLA-A02:07;HLA-A24:02;HLA-A36:01;HLA-B15:01;HLA-B46:01;HLA-C04:01;HLA-C05:01;HLA-C08:02;HLA-C17:01	0.69990154	0.724992102	0.649662599	False
orf1ab polyprotein	6302	6310	FTDGVCLFW	HLA-A01:01;HLA-A36:01;HLA-B53:01;HLA-B57:01;HLA-B57:03;HLA-B58:01;HLA-C02:02;HLA-C03:03;HLA-C04:01;HLA-C05:01;HLA-C08:01;HLA-C08:02;HLA-C15:02	0.725196715	0.733346303	0.60051148	False
orf1a polyprotein;orf1ab polyprotein	751	758	VLTEEVVL	HLA-A02:01;HLA-B08:01;HLA-B48:01;HLA-B81:01;HLA-C04:01;HLA-C05:01;HLA-C08:01;HLA-C08:02;HLA-C17:01	0.746460506	0.782484887	0.482459037	False
orf1ab polyprotein	5463	5471	KATEETFKL	HLA-A23:01;HLA-A32:01;HLA-B13:02;HLA-B35:03;HLA-B48:01;HLA-B53:01;HLA-B57:01;HLA-B57:03;HLA-B58:01;HLA-B58:02;HLA-C02:02;HLA-C03:03;HLA-C03:04;HLA-C05:01;HLA-C08:02;HLA-C12:02;HLA-C12:03;HLA-C15:02;HLA-C17:01	0.719491671	0.718206476	0.627377009	False
orf1ab polyprotein	5772	5779	IVDTVSAL	HLA-A01:01;HLA-A02:07;HLA-B15:09;HLA-C03:03;HLA-C03:04;HLA-C04:01;HLA-C05:01;HLA-C08:01;HLA-C08:02;HLA-C17:01	0.71289546	0.735404153	0.607581777	False
ORF9b protein	14	21	LVDPQIQL	HLA-A01:01;HLA-A02:07;HLA-B15:09;HLA-C03:03;HLA-C03:04;HLA-C04:01;HLA-C05:01;HLA-C08:01;HLA-C08:02;HLA-C17:01	0.71289546	0.735404153	0.607581777	True
orf1a polyprotein;orf1ab polyprotein	2228	2236	NIIIWFLLL	HLA-A02:04;HLA-A02:07;HLA-A03:01;HLA-A23:01;HLA-A26:01;HLA-A68:02;HLA-B08:01;HLA-B14:02;HLA-B15:09;HLA-B38:01;HLA-C03:02;HLA-C03:03;HLA-C03:04;HLA-C08:01;HLA-C12:02;HLA-C15:02;HLA-C17:01	0.686489215	0.702839929	0.696312003	False
orf1a polyprotein;orf1ab polyprotein	4093	4101	SALWEIQQV	HLA-A02:01;HLA-A02:04;HLA-A30:01;HLA-B13:02;HLA-B35:03;HLA-B51:01;HLA-C02:02;HLA-C06:02;HLA-C12:02;HLA-C12:03;HLA-C15:02	0.708800461	0.750421807	0.59422311	False
orf1a polyprotein;orf1ab polyprotein	2967	2975	TYLEGSVRV	HLA-A02:01;HLA-A02:04;HLA-A23:01;HLA-A24:02;HLA-B49:01;HLA-C04:01;HLA-C14:02;HLA-C14:03	0.711582857	0.726534123	0.618853749	False
orf1a polyprotein;orf1ab polyprotein	3839	3847	KLNIKLLGV	HLA-A02:01;HLA-A02:03;HLA-A02:04;HLA-A02:07;HLA-A03:01;HLA-A32:01;HLA-A36:01;HLA-B08:01;HLA-B13:02;HLA-C15:02	0.723398888	0.805970416	0.478692364	False
orf1a polyprotein;orf1ab polyprotein	3685	3693	YASAVVLLI	HLA-A68:02;HLA-B13:02;HLA-B35:01;HLA-B35:03;HLA-B38:01;HLA-B51:01;HLA-B53:01;HLA-B58:02;HLA-C02:02;HLA-C03:04;HLA-C06:02;HLA-C08:01;HLA-C12:02;HLA-C12:03;HLA-C15:02;HLA-C17:01	0.690241928	0.664153293	0.706074896	False
orf1a polyprotein;orf1ab polyprotein	3684	3691	MYASAVVL	HLA-A24:02;HLA-B15:09;HLA-B39:01;HLA-C04:01;HLA-C06:02;HLA-C07:02;HLA-C14:02;HLA-C14:03	0.665427934	0.664985931	0.727788886	False
orf1a polyprotein;orf1ab polyprotein	1657	1664	KYPQVNGL	HLA-A23:01;HLA-A24:02;HLA-B37:01;HLA-C01:02;HLA-C04:01;HLA-C07:02;HLA-C14:02;HLA-C14:03	0.641844267	0.612774275	0.784271256	False
orf1ab polyprotein	4859	4867	RQLLFVVEV	HLA-A02:01;HLA-A02:04;HLA-A30:01;HLA-B13:02;HLA-B15:01;HLA-B15:03;HLA-B27:05;HLA-B37:01;HLA-B40:02;HLA-B48:01;HLA-B52:01;HLA-C06:02;HLA-C12:02;HLA-C15:02	0.700392773	0.739942428	0.61844096	False
orf1a polyprotein;orf1ab polyprotein	2881	2889	FLHFLPRVF	HLA-A29:02;HLA-B15:01;HLA-B15:03;HLA-B46:01;HLA-C03:02;HLA-C04:01;HLA-C06:02;HLA-C07:02;HLA-C12:02;HLA-C17:01	0.684994026	0.672849688	0.701044662	False
membrane glycoprotein	53	62	FLWLLWPVTL	HLA-A02:01;HLA-A02:03;HLA-A02:04;HLA-A02:07;HLA-B48:01;HLA-C01:02;HLA-C04:01;HLA-C08:01;HLA-C08:02;HLA-C12:02;HLA-C17:01	0.676203854	0.674697425	0.715919721	False
orf1ab polyprotein	4998	5006	YSDVENPHL	HLA-A01:01;HLA-A02:07;HLA-B38:01;HLA-B58:01;HLA-C03:03;HLA-C03:04;HLA-C04:01;HLA-C05:01;HLA-C08:02;HLA-C17:01	0.721352276	0.74919347	0.570667442	False
orf1ab polyprotein	4686	4694	YHPNCVNCL	HLA-B15:09;HLA-B38:01;HLA-B39:01;HLA-C01:02;HLA-C04:01;HLA-C06:02;HLA-C07:02;HLA-C14:02;HLA-C14:03	0.652991049	0.650002914	0.746161634	False
ORF7a protein	105	112	AAIVFITL	HLA-B08:01;HLA-B46:01;HLA-B51:01;HLA-B81:01;HLA-C02:02;HLA-C03:02;HLA-C03:03;HLA-C03:04;HLA-C08:01;HLA-C08:02;HLA-C12:02;HLA-C12:03;HLA-C15:02;HLA-C17:01	0.654061867	0.660897716	0.735574011	False
nucleocapsid phosphoprotein	125	133	ANKDGIIWV	HLA-A02:01;HLA-A02:03;HLA-A02:04;HLA-A30:01;HLA-B13:02;HLA-B45:01;HLA-B46:01;HLA-B49:01;HLA-B55:01;HLA-C02:02;HLA-C06:02;HLA-C12:02;HLA-C12:03;HLA-C15:02	0.701404904	0.735934594	0.608172003	False
membrane glycoprotein	171	179	ATSRTLSYY	HLA-A01:01;HLA-A03:01;HLA-A11:01;HLA-A25:01;HLA-A26:01;HLA-A29:02;HLA-A30:02;HLA-A36:01;HLA-B57:01;HLA-B57:03;HLA-B58:01;HLA-C02:02	0.700315186	0.754936126	0.583856563	False
orf1ab polyprotein	6221	6228	YPIIGDEL	HLA-B07:02;HLA-B08:01;HLA-B14:02;HLA-B35:01;HLA-B35:03;HLA-B42:01;HLA-B51:01;HLA-B54:01;HLA-B81:01;HLA-C03:02;HLA-C03:04;HLA-C08:01;HLA-C14:02;HLA-C14:03	0.677656997	0.719195465	0.675558337	False
orf1a polyprotein;orf1ab polyprotein	2099	2107	YVDNSSLTI	HLA-A01:01;HLA-A02:07;HLA-B13:02;HLA-B15:09;HLA-B35:03;HLA-B38:01;HLA-B49:01;HLA-B53:01;HLA-C03:04;HLA-C04:01;HLA-C05:01;HLA-C08:01;HLA-C08:02	0.710790606	0.730010919	0.594233302	False
orf1a polyprotein;orf1ab polyprotein	2968	2975	YLEGSVRV	HLA-A01:01;HLA-A02:01;HLA-C04:01;HLA-C05:01	0.742999981	0.817264188	0.394100729	False
orf1a polyprotein;orf1ab polyprotein	404	411	IAFGGCVF	HLA-B15:01;HLA-B15:03;HLA-B35:01;HLA-B46:01;HLA-B51:01;HLA-B53:01;HLA-B57:01;HLA-B57:03;HLA-B58:01;HLA-B58:02;HLA-C02:02;HLA-C03:02;HLA-C03:03;HLA-C03:04;HLA-C12:02;HLA-C12:03;HLA-C17:01	0.671944703	0.645927094	0.72281037	False
ORF7b	24	32	MLIIFWFSL	HLA-A02:01;HLA-A02:04;HLA-A02:07;HLA-A32:01;HLA-A68:02;HLA-B08:01;HLA-B15:01;HLA-B46:01;HLA-C03:04;HLA-C12:02	0.694574382	0.762162982	0.569127734	False
orf1a polyprotein;orf1ab polyprotein	473	480	IAIILASF	HLA-B08:01;HLA-B15:01;HLA-B35:01;HLA-B46:01;HLA-B51:01;HLA-B57:01;HLA-B57:03;HLA-B58:01;HLA-C02:02;HLA-C03:02;HLA-C03:03;HLA-C03:04	0.661686597	0.701789841	0.678371555	False
orf1a polyprotein;orf1ab polyprotein	1619	1627	YVLPNDDTL	HLA-A02:01;HLA-A02:04;HLA-A02:07;HLA-B35:01;HLA-B35:03;HLA-B38:01;HLA-B48:01;HLA-B57:03;HLA-C03:02;HLA-C03:03;HLA-C03:04;HLA-C08:01;HLA-C17:01	0.673392924	0.703487922	0.674852615	False
orf1ab polyprotein	4905	4913	RLYYDSMSY	HLA-A01:01;HLA-A03:01;HLA-A29:02;HLA-A30:01;HLA-A30:02;HLA-A32:01;HLA-A36:01;HLA-B15:01;HLA-B15:03;HLA-B46:01;HLA-B58:01;HLA-C07:01	0.735958293	0.786209568	0.479048141	False
ORF3a protein	108	115	LYALVYFL	HLA-A24:02;HLA-C04:01;HLA-C06:02;HLA-C07:02;HLA-C14:02;HLA-C14:03	0.659156009	0.65850811	0.720401011	False
surface glycoprotein	865	873	LTDEMIAQY	HLA-A01:01;HLA-A02:07;HLA-A25:01;HLA-A26:01;HLA-A29:02;HLA-A30:02;HLA-A36:01;HLA-B53:01;HLA-B57:01;HLA-B57:03;HLA-C02:02;HLA-C04:01;HLA-C05:01;HLA-C08:02;HLA-C12:03	0.75200192	0.770310611	0.452175162	False
orf1a polyprotein;orf1ab polyprotein	2948	2956	LRPDTRYVL	HLA-A02:07;HLA-B14:02;HLA-B39:01;HLA-C01:02;HLA-C06:02;HLA-C07:01;HLA-C07:02	0.664023021	0.710108795	0.662388531	False
orf1a polyprotein;orf1ab polyprotein	3769	3776	FFITGNTL	HLA-A23:01;HLA-A24:02;HLA-C03:02;HLA-C03:03;HLA-C03:04;HLA-C04:01;HLA-C08:01;HLA-C08:02;HLA-C14:02;HLA-C14:03	0.642095175	0.599534225	0.77363447	False
orf1a polyprotein;orf1ab polyprotein	4198	4206	KSDGTGTIY	HLA-A01:01;HLA-A30:02;HLA-A36:01;HLA-B15:01;HLA-B15:03;HLA-B57:01;HLA-B57:03;HLA-B58:01;HLA-B58:02;HLA-C02:02;HLA-C05:01;HLA-C07:01;HLA-C08:02;HLA-C12:03	0.750202916	0.798087293	0.404854781	False
orf1ab polyprotein	6220	6228	EYPIIGDEL	HLA-A23:01;HLA-A24:02;HLA-C01:02;HLA-C04:01;HLA-C07:02;HLA-C14:02;HLA-C14:03	0.633743312	0.602127788	0.777781678	False
surface glycoprotein	269	276	YLQPRTFL	HLA-A02:01;HLA-A02:04;HLA-B08:01;HLA-C03:02;HLA-C03:04;HLA-C04:01;HLA-C14:03;HLA-C17:01	0.717866576	0.75472911	0.536936934	False
orf1a polyprotein;orf1ab polyprotein	2363	2371	WLMWLIINL	HLA-A02:01;HLA-A02:03;HLA-A02:04;HLA-A02:07;HLA-A30:01;HLA-A68:02;HLA-C06:02;HLA-C07:01;HLA-C12:02;HLA-C17:01	0.718804732	0.755852106	0.527396093	False
orf1a polyprotein;orf1ab polyprotein	1091	1099	IATNGPLKV	HLA-A68:02;HLA-B13:02;HLA-B51:01;HLA-B53:01;HLA-B54:01;HLA-C02:02;HLA-C03:04;HLA-C05:01;HLA-C06:02;HLA-C08:01;HLA-C12:02;HLA-C12:03;HLA-C15:02	0.670696675	0.677487857	0.685588969	False
orf1a polyprotein;orf1ab polyprotein	2998	3006	VSTSGRWVL	HLA-A32:01;HLA-B48:01;HLA-B57:03;HLA-B58:01;HLA-B58:02;HLA-C02:02;HLA-C03:03;HLA-C03:04;HLA-C07:01;HLA-C08:01;HLA-C12:02;HLA-C12:03;HLA-C15:02	0.669274226	0.685192767	0.68005884	False
orf1a polyprotein;orf1ab polyprotein	3792	3800	CYFGLFCLL	HLA-A23:01;HLA-A24:02;HLA-A30:01;HLA-C04:01;HLA-C06:02;HLA-C07:02	0.683419599	0.669050281	0.682922591	False
orf1a polyprotein;orf1ab polyprotein	1500	1507	HFIETISL	HLA-A23:01;HLA-B08:01;HLA-B14:02;HLA-B15:09;HLA-B18:01;HLA-B39:01;HLA-B40:02;HLA-B46:01;HLA-B48:01;HLA-B52:01;HLA-C03:02;HLA-C03:04;HLA-C04:01;HLA-C08:01;HLA-C14:02;HLA-C14:03	0.661079763	0.635655504	0.735232931	False
orf1ab polyprotein	5815	5823	PQIGVVREF	HLA-A23:01;HLA-A24:02;HLA-A25:01;HLA-B13:02;HLA-B15:01;HLA-B15:03;HLA-B38:01;HLA-B46:01;HLA-C02:02;HLA-C06:02;HLA-C07:01;HLA-C12:02	0.689904623	0.71045173	0.634389837	False
orf1ab polyprotein	6807	6815	VAMPNLYKM	HLA-B35:01;HLA-B35:03;HLA-B51:01;HLA-B57:01;HLA-B57:03;HLA-B58:01;HLA-C02:02;HLA-C03:02;HLA-C03:03;HLA-C03:04;HLA-C05:01;HLA-C12:02;HLA-C12:03;HLA-C17:01	0.671621121	0.686072303	0.671404621	False
ORF7a protein	49	56	LADNKFAL	HLA-B08:01;HLA-B35:03;HLA-C03:02;HLA-C03:03;HLA-C03:04;HLA-C04:01;HLA-C05:01;HLA-C08:01;HLA-C08:02	0.685650692	0.710474813	0.626577507	False
orf1a polyprotein;orf1ab polyprotein	4087	4095	TTFTYASAL	HLA-A25:01;HLA-A32:01;HLA-A68:02;HLA-B15:09;HLA-C01:02;HLA-C03:03;HLA-C03:04;HLA-C07:01;HLA-C12:02;HLA-C12:03;HLA-C14:02;HLA-C14:03	0.647569932	0.68380267	0.69552592	False
orf1a polyprotein;orf1ab polyprotein	1563	1571	REVRTIKVF	HLA-A23:01;HLA-B15:01;HLA-B15:03;HLA-B18:01;HLA-B37:01;HLA-B40:01;HLA-B40:02;HLA-B41:01;HLA-B44:02;HLA-B44:03;HLA-B48:01;HLA-B49:01;HLA-B50:01;HLA-B57:01;HLA-B57:03;HLA-C07:01	0.719727504	0.756329004	0.513714536	False
surface glycoprotein	1220	1228	FIAGLIAIV	HLA-A02:01;HLA-A02:03;HLA-A02:04;HLA-A02:07;HLA-A26:01;HLA-A68:02;HLA-B13:02;HLA-B15:09;HLA-C02:02;HLA-C06:02;HLA-C08:01;HLA-C12:02;HLA-C15:02	0.670591092	0.702136449	0.65852219	False
orf1a polyprotein;orf1ab polyprotein	2359	2367	ISNSWLMWL	HLA-A02:04;HLA-B57:03;HLA-B58:02;HLA-C01:02;HLA-C02:02;HLA-C03:02;HLA-C03:03;HLA-C03:04;HLA-C06:02;HLA-C12:02;HLA-C12:03;HLA-C15:02;HLA-C17:01	0.631372418	0.617426984	0.76609235	False
orf1ab polyprotein	6577	6585	GRVDGQVDL	HLA-B14:02;HLA-B15:09;HLA-B27:05;HLA-B38:01;HLA-B39:01;HLA-B40:01;HLA-B48:01;HLA-C06:02;HLA-C07:01;HLA-C07:02	0.689023439	0.749240941	0.571591439	False
orf1ab polyprotein	6284	6292	KAYKIEELF	HLA-A23:01;HLA-A24:02;HLA-A29:02;HLA-A32:01;HLA-B15:01;HLA-B15:03;HLA-B35:01;HLA-B53:01;HLA-B57:01;HLA-B57:03;HLA-B58:01;HLA-B58:02;HLA-C02:02;HLA-C05:01;HLA-C12:02;HLA-C12:03;HLA-C17:01	0.710872844	0.690645375	0.619222778	False
orf1a polyprotein;orf1ab polyprotein	2297	2304	SLDTYPSL	HLA-A02:01;HLA-A02:07;HLA-B15:09;HLA-C01:02;HLA-C04:01;HLA-C05:01;HLA-C08:02;HLA-C17:01	0.710935825	0.736884869	0.557827859	False
orf1a polyprotein;orf1ab polyprotein	3100	3107	FLPGVYSV	HLA-A02:01;HLA-A02:03;HLA-A02:04;HLA-A02:07;HLA-C01:02;HLA-C04:01;HLA-C06:02	0.678169216	0.704325255	0.642472642	False
ORF3a protein	207	214	FTSDYYQL	HLA-A68:02;HLA-B58:02;HLA-C02:02;HLA-C03:02;HLA-C03:03;HLA-C03:04;HLA-C07:02;HLA-C08:01;HLA-C12:03;HLA-C15:02	0.630867429	0.637938146	0.746740393	False
surface glycoprotein	604	612	TSNQVAVLY	HLA-A01:01;HLA-A29:02;HLA-A30:02;HLA-A36:01;HLA-A68:01;HLA-B15:01;HLA-B35:01;HLA-B53:01;HLA-B57:01;HLA-B57:03;HLA-B58:01;HLA-B58:02;HLA-C02:02;HLA-C07:01;HLA-C12:02	0.73225849	0.753150178	0.489766706	False
orf1ab polyprotein	6832	6840	ATLPKGIMM	HLA-A03:01;HLA-A11:01;HLA-A30:01;HLA-B57:01;HLA-B57:03;HLA-C02:02;HLA-C03:03;HLA-C03:04;HLA-C12:02;HLA-C12:03;HLA-C15:02	0.649522451	0.67900876	0.684662315	False
orf1a polyprotein;orf1ab polyprotein	243	251	ERSEKSYEL	HLA-A68:02;HLA-B08:01;HLA-B14:02;HLA-B15:09;HLA-B38:01;HLA-B39:01;HLA-C06:02;HLA-C07:01;HLA-C07:02	0.712006647	0.773815396	0.476489943	False
membrane glycoprotein	43	51	NRFLYIIKL	HLA-B14:02;HLA-B15:09;HLA-B18:01;HLA-B27:05;HLA-B38:01;HLA-B39:01;HLA-C06:02;HLA-C07:01;HLA-C07:02;HLA-C12:02	0.693697854	0.750923176	0.540487723	False
orf1a polyprotein;orf1ab polyprotein	1381	1388	HAEETRKL	HLA-B08:01;HLA-B35:03;HLA-B53:01;HLA-B58:02;HLA-C03:03;HLA-C03:04;HLA-C04:01;HLA-C05:01;HLA-C08:02;HLA-C12:03	0.725675297	0.754536475	0.488842702	False
ORF3a protein	112	120	VYFLQSINF	HLA-A23:01;HLA-A24:02;HLA-A29:02;HLA-B15:01;HLA-B15:03;HLA-C04:01;HLA-C07:02;HLA-C14:02;HLA-C14:03	0.668241025	0.651606517	0.687380505	False
orf1ab polyprotein	6154	6162	HSIGFDYVY	HLA-A25:01;HLA-A26:01;HLA-A29:02;HLA-A30:02;HLA-A36:01;HLA-B15:01;HLA-B15:03;HLA-B18:01;HLA-B35:03;HLA-B46:01;HLA-B53:01;HLA-B57:01;HLA-B57:03;HLA-B58:01;HLA-B58:02;HLA-C02:02;HLA-C03:02;HLA-C07:01;HLA-C12:02;HLA-C12:03	0.699112764	0.69554186	0.607543223	False
orf1a polyprotein;orf1ab polyprotein	1015	1023	ELTPVVQTI	HLA-A02:01;HLA-A02:03;HLA-A02:04;HLA-A02:07;HLA-A23:01;HLA-A24:02;HLA-A25:01;HLA-A68:02;HLA-B13:02;HLA-B38:01;HLA-B53:01;HLA-B58:02	0.687798251	0.705096418	0.60795061	False
orf1a polyprotein;orf1ab polyprotein	620	628	VYEKLKPVL	HLA-A23:01;HLA-A24:02;HLA-C04:01;HLA-C05:01;HLA-C07:02;HLA-C14:02;HLA-C14:03	0.668222569	0.669288695	0.671041906	False
orf1ab polyprotein	4657	4665	YIKWDLLKY	HLA-A01:01;HLA-A03:01;HLA-A25:01;HLA-A26:01;HLA-A29:02;HLA-A30:01;HLA-A30:02;HLA-A32:01;HLA-A36:01;HLA-B15:01;HLA-B46:01;HLA-C02:02;HLA-C03:02;HLA-C12:02	0.708480339	0.761862141	0.529302973	False
orf1a polyprotein;orf1ab polyprotein	2960	2968	SIIQFPNTY	HLA-A02:03;HLA-A03:01;HLA-A11:01;HLA-A25:01;HLA-A26:01;HLA-A29:02;HLA-A30:02;HLA-A32:01;HLA-B15:01;HLA-B15:03;HLA-B18:01;HLA-B46:01;HLA-C02:02;HLA-C03:02;HLA-C12:02	0.652526441	0.672700519	0.679700308	False
orf1a polyprotein;orf1ab polyprotein	4393	4400	SADAQSFL	HLA-C02:02;HLA-C03:03;HLA-C03:04;HLA-C04:01;HLA-C05:01;HLA-C08:01;HLA-C08:02;HLA-C12:03;HLA-C17:01	0.716029047	0.713892688	0.563673698	False
surface glycoprotein	1192	1200	NLNESLIDL	HLA-A02:01;HLA-A02:03;HLA-A02:04;HLA-A02:07;HLA-B08:01;HLA-B81:01;HLA-C01:02;HLA-C04:01;HLA-C17:01	0.687972315	0.720348214	0.590868869	False
ORF6 protein	9	17	VTIAEILLI	HLA-A11:01;HLA-A23:01;HLA-A24:02;HLA-A25:01;HLA-A29:02;HLA-A68:02;HLA-B13:02;HLA-B38:01;HLA-B51:01;HLA-B57:01;HLA-B57:03;HLA-B58:02;HLA-C12:02;HLA-C12:03;HLA-C15:02	0.626231472	0.61033222	0.755071644	False
orf1a polyprotein;orf1ab polyprotein	3078	3085	VAFNTLLF	HLA-A24:02;HLA-A29:02;HLA-B35:01;HLA-B46:01;HLA-B51:01;HLA-B53:01;HLA-B57:01;HLA-B57:03;HLA-B58:01;HLA-C02:02;HLA-C03:02;HLA-C03:03;HLA-C12:02;HLA-C12:03;HLA-C17:01	0.637441851	0.602458023	0.747898245	False
surface glycoprotein	508	515	YRVVVLSF	HLA-B14:02;HLA-B27:05;HLA-B39:01;HLA-C03:02;HLA-C06:02;HLA-C07:01;HLA-C07:02;HLA-C14:02;HLA-C14:03	0.664638217	0.71365892	0.61861543	False
ORF7a protein	88	96	IRQEEVQEL	HLA-A02:04;HLA-B14:02;HLA-B15:09;HLA-B27:05;HLA-B35:03;HLA-B38:01;HLA-B39:01;HLA-C06:02;HLA-C07:01;HLA-C07:02;HLA-C14:02;HLA-C14:03	0.679578362	0.734980573	0.573560596	False
surface glycoprotein	395	403	VYADSFVIR	HLA-A11:01;HLA-A23:01;HLA-A24:02;HLA-A31:01;HLA-A33:03;HLA-A68:01;HLA-A74:01;HLA-C07:02	0.588679639	0.549208474	0.824841599	False
ORF8 protein	32	41	VVDDPCPIHF	HLA-A02:07;HLA-A24:02;HLA-A29:02;HLA-A32:01;HLA-B57:01;HLA-C02:02;HLA-C03:03;HLA-C04:01;HLA-C05:01;HLA-C08:02;HLA-C17:01	0.703827983	0.704286228	0.599103874	False
orf1a polyprotein;orf1ab polyprotein	38	46	VLSEARQHL	HLA-A02:01;HLA-A02:03;HLA-A02:04;HLA-A02:07;HLA-A24:02;HLA-A32:01;HLA-C01:02	0.626712935	0.676632855	0.697738777	False
orf1a polyprotein;orf1ab polyprotein	627	635	VLDWLEEKF	HLA-A01:01;HLA-A02:07;HLA-A24:02;HLA-A29:02;HLA-A36:01;HLA-B53:01;HLA-C04:01;HLA-C05:01;HLA-C08:02;HLA-C17:01	0.704241077	0.713557612	0.573775239	False
orf1a polyprotein;orf1ab polyprotein	1270	1278	LVSDIDITF	HLA-A02:07;HLA-A24:02;HLA-A29:02;HLA-A32:01;HLA-A68:02;HLA-B15:01;HLA-B35:01;HLA-B35:03;HLA-B38:01;HLA-B42:01;HLA-B53:01;HLA-B57:01;HLA-B57:03;HLA-B58:01;HLA-B58:02;HLA-B81:01;HLA-C02:02;HLA-C03:03;HLA-C12:02	0.666074897	0.641730895	0.69015351	False
orf1a polyprotein;orf1ab polyprotein	1176	1183	AVFDKNLY	HLA-A01:01;HLA-A03:01;HLA-A29:02;HLA-A30:02;HLA-A32:01;HLA-A36:01;HLA-B15:01;HLA-B58:01;HLA-C02:02;HLA-C07:01	0.735459318	0.795672697	0.377687327	False
orf1a polyprotein;orf1ab polyprotein	2594	2602	YVNTFSSTF	HLA-A24:02;HLA-A25:01;HLA-A26:01;HLA-A29:02;HLA-A32:01;HLA-B15:01;HLA-B15:03;HLA-B35:03;HLA-B46:01;HLA-B53:01;HLA-B57:01;HLA-B57:03;HLA-B58:01;HLA-C02:02;HLA-C03:02;HLA-C03:03;HLA-C14:02;HLA-C14:03	0.626263939	0.61132445	0.744011519	False
orf1ab polyprotein	6419	6427	YLDAYNMMI	HLA-A01:01;HLA-A02:01;HLA-A02:07;HLA-B13:02;HLA-B38:01;HLA-C05:01;HLA-C08:02	0.711495011	0.805888303	0.393838047	False
orf1ab polyprotein	5282	5290	KLHDELTGH	HLA-A02:01;HLA-A02:03;HLA-A02:04;HLA-A02:07;HLA-A03:01;HLA-A32:01;HLA-A74:01;HLA-B13:02;HLA-B15:01;HLA-B46:01	0.691059548	0.76969188	0.515791169	False
orf1a polyprotein;orf1ab polyprotein	692	700	SIIIGGAKL	HLA-A02:04;HLA-A23:01;HLA-A25:01;HLA-A26:01;HLA-A68:02;HLA-B13:02;HLA-B15:01;HLA-B15:09;HLA-B38:01;HLA-B40:01;HLA-B40:02;HLA-B81:01;HLA-C02:02;HLA-C03:03;HLA-C03:04;HLA-C05:01;HLA-C08:02;HLA-C17:01	0.702889995	0.726884164	0.548993235	False
membrane glycoprotein	168	176	ITVATSRTL	HLA-A25:01;HLA-B57:03;HLA-B58:01;HLA-B58:02;HLA-C03:03;HLA-C03:04;HLA-C06:02;HLA-C07:01;HLA-C12:03;HLA-C15:02	0.679137125	0.726295601	0.583724036	False
orf1ab polyprotein	6578	6586	RVDGQVDLF	HLA-A01:01;HLA-A02:07;HLA-A29:02;HLA-A30:02;HLA-A32:01;HLA-A36:01;HLA-B38:01;HLA-B53:01;HLA-B57:01;HLA-B57:03;HLA-B58:01;HLA-C02:02;HLA-C04:01;HLA-C05:01;HLA-C08:02;HLA-C17:01	0.741848982	0.743245626	0.458999012	False
ORF7a protein	96	104	LYSPIFLIV	HLA-A23:01;HLA-A24:02;HLA-A68:02;HLA-B51:01;HLA-B54:01;HLA-C06:02;HLA-C07:02;HLA-C12:02;HLA-C15:02	0.623082767	0.618304633	0.737772786	False
surface glycoprotein	424	432	KLPDDFTGC	HLA-A02:01;HLA-A02:07;HLA-A03:01;HLA-A32:01;HLA-B15:01;HLA-C01:02	0.686189	0.770063942	0.526844256	False
nucleocapsid phosphoprotein	346	353	FKDQVILL	HLA-C04:01;HLA-C05:01;HLA-C06:02;HLA-C07:02;HLA-C08:02;HLA-C17:01	0.717132918	0.734970664	0.517405804	False
ORF9b protein	87	94	LPDEFVVV	HLA-A02:07;HLA-B07:02;HLA-B08:01;HLA-B35:03;HLA-B42:01;HLA-B51:01;HLA-B53:01;HLA-B54:01;HLA-B55:01;HLA-C04:01;HLA-C05:01;HLA-C08:02	0.716953491	0.75053449	0.480241903	False
orf1a polyprotein;orf1ab polyprotein	45	53	HLKDGTCGL	HLA-A02:01;HLA-A02:03;HLA-A02:04;HLA-A25:01;HLA-A26:01;HLA-A30:01;HLA-A32:01;HLA-B08:01;HLA-B15:01;HLA-B46:01;HLA-B48:01	0.683133972	0.756859517	0.517767303	False
orf1a polyprotein;orf1ab polyprotein	445	453	GLNDNLLEI	HLA-A02:01;HLA-A02:03;HLA-A02:04;HLA-A02:07;HLA-A03:01;HLA-A23:01;HLA-A25:01;HLA-A32:01;HLA-B13:02;HLA-C15:02	0.708023436	0.778064968	0.464563099	False
orf1a polyprotein;orf1ab polyprotein	3010	3018	YYRSLPGVF	HLA-A23:01;HLA-A24:02;HLA-A29:02;HLA-B15:03;HLA-C02:02;HLA-C04:01;HLA-C07:02;HLA-C14:02;HLA-C14:03	0.673306683	0.639769575	0.668138105	False
orf1a polyprotein;orf1ab polyprotein	3241	3249	FSNSGSDVL	HLA-B35:03;HLA-B57:03;HLA-B58:02;HLA-C01:02;HLA-C02:02;HLA-C03:02;HLA-C03:03;HLA-C03:04;HLA-C08:01;HLA-C08:02;HLA-C12:02;HLA-C12:03;HLA-C15:02;HLA-C17:01	0.598567141	0.56150982	0.794032641	False
orf1a polyprotein;orf1ab polyprotein	3072	3080	GEYSHVVAF	HLA-B15:01;HLA-B15:03;HLA-B15:09;HLA-B18:01;HLA-B37:01;HLA-B40:01;HLA-B40:02;HLA-B41:01;HLA-B44:02;HLA-B44:03;HLA-B45:01;HLA-B46:01;HLA-B49:01;HLA-B50:01;HLA-B53:01;HLA-C07:01	0.697548419	0.720726553	0.542179039	False
orf1ab polyprotein	6939	6947	KENDSKEGF	HLA-A23:01;HLA-A32:01;HLA-B15:01;HLA-B15:03;HLA-B18:01;HLA-B37:01;HLA-B40:01;HLA-B40:02;HLA-B41:01;HLA-B44:02;HLA-B44:03;HLA-B58:01;HLA-C07:01	0.691056983	0.727236232	0.536916737	False
orf1a polyprotein;orf1ab polyprotein	4226	4234	KYLYFIKGL	HLA-A23:01;HLA-A24:02;HLA-A30:01;HLA-A32:01;HLA-C07:01;HLA-C07:02;HLA-C14:02;HLA-C14:03	0.654234986	0.672794951	0.652865465	False
membrane glycoprotein	45	54	FLYIIKLIFL	HLA-A02:01;HLA-A02:03;HLA-A02:04;HLA-A02:07;HLA-A03:01;HLA-A68:02;HLA-C06:02;HLA-C12:02;HLA-C17:01	0.699555208	0.758077086	0.489907498	False
orf1a polyprotein;orf1ab polyprotein	4229	4237	YFIKGLNNL	HLA-A02:03;HLA-A23:01;HLA-A24:02;HLA-B38:01;HLA-C02:02;HLA-C03:02;HLA-C04:01;HLA-C06:02;HLA-C08:01;HLA-C14:02;HLA-C14:03;HLA-C17:01	0.641433086	0.573873856	0.742287613	False
orf1ab polyprotein	4419	4427	STDVVYRAF	HLA-A01:01;HLA-A25:01;HLA-B46:01;HLA-B53:01;HLA-B57:01;HLA-B57:03;HLA-B58:01;HLA-C02:02;HLA-C03:03;HLA-C04:01;HLA-C05:01;HLA-C08:02	0.707588536	0.730827257	0.516473351	False
orf1a polyprotein;orf1ab polyprotein	88	97	LVAELEGIQY	HLA-A01:01;HLA-A03:01;HLA-A25:01;HLA-A26:01;HLA-A29:02;HLA-A30:01;HLA-A30:02;HLA-A36:01;HLA-B15:01;HLA-B35:01;HLA-B46:01;HLA-B57:01	0.701998273	0.763335687	0.475930327	False
orf1a polyprotein;orf1ab polyprotein	3646	3654	TVAYFNMVY	HLA-A01:01;HLA-A25:01;HLA-A26:01;HLA-A29:02;HLA-A30:02;HLA-A32:01;HLA-A36:01;HLA-B15:01;HLA-B35:01;HLA-C02:02;HLA-C07:01;HLA-C12:02	0.712609719	0.762999894	0.433125239	False
surface glycoprotein	506	513	QPYRVVVL	HLA-B07:02;HLA-B08:01;HLA-B14:02;HLA-B35:01;HLA-B35:03;HLA-B42:01;HLA-B51:01;HLA-B52:01;HLA-B81:01;HLA-C07:01	0.711494047	0.769448041	0.425162733	False
surface glycoprotein	372	380	ASFSTFKCY	HLA-A01:01;HLA-A11:01;HLA-A25:01;HLA-A30:01;HLA-A30:02;HLA-A32:01;HLA-A36:01;HLA-B15:01;HLA-B15:03;HLA-B46:01;HLA-B57:01;HLA-C02:02;HLA-C12:02;HLA-C12:03	0.644919681	0.680822492	0.63994922	False
orf1ab polyprotein	6101	6109	NLSDRVVFV	HLA-A02:01;HLA-A02:03;HLA-A02:04;HLA-A02:07;HLA-A68:02;HLA-B08:01;HLA-B13:02;HLA-C06:02;HLA-C12:02;HLA-C15:02	0.669437321	0.731011814	0.551596518	False
surface glycoprotein	712	720	IAIPTNFTI	HLA-A23:01;HLA-A24:02;HLA-B35:03;HLA-B38:01;HLA-B51:01;HLA-B53:01;HLA-B57:01;HLA-B57:03;HLA-B58:01;HLA-B58:02;HLA-C03:04;HLA-C08:01;HLA-C08:02;HLA-C12:02;HLA-C12:03	0.625617067	0.589901768	0.735554138	False
orf1ab polyprotein	4773	4780	HAASGNLL	HLA-B08:01;HLA-B35:03;HLA-B48:01;HLA-B53:01;HLA-B58:01;HLA-B58:02;HLA-B81:01;HLA-C02:02;HLA-C03:02;HLA-C03:03;HLA-C03:04;HLA-C05:01;HLA-C08:01;HLA-C12:03;HLA-C17:01	0.662102802	0.667872216	0.632830163	False
orf1a polyprotein;orf1ab polyprotein	2242	2250	SLIYSTAAL	HLA-A02:01;HLA-A02:03;HLA-A02:04;HLA-A02:07;HLA-A25:01;HLA-B15:09;HLA-B46:01;HLA-C01:02;HLA-C03:02;HLA-C03:04;HLA-C14:02;HLA-C14:03	0.597210671	0.640610549	0.732192963	False
orf1a polyprotein;orf1ab polyprotein	3109	3116	YLYLTFYL	HLA-A02:01;HLA-A02:04;HLA-B08:01;HLA-C03:02;HLA-C04:01;HLA-C08:01;HLA-C08:02;HLA-C17:01	0.696235018	0.727498607	0.520368279	False
orf1a polyprotein;orf1ab polyprotein	2351	2358	FSYFAVHF	HLA-B46:01;HLA-B58:01;HLA-B58:02;HLA-C02:02;HLA-C03:02;HLA-C03:03;HLA-C03:04;HLA-C04:01;HLA-C08:02;HLA-C12:02;HLA-C12:03;HLA-C17:01	0.663297248	0.624745532	0.674390998	False
orf1a polyprotein;orf1ab polyprotein	2489	2496	YIVDSVTV	HLA-A02:01;HLA-A68:02;HLA-B15:09;HLA-B46:01;HLA-B52:01;HLA-C02:02;HLA-C03:02;HLA-C03:04;HLA-C08:01;HLA-C12:02;HLA-C15:02	0.636284845	0.656300424	0.690146744	False
orf1ab polyprotein	5306	5313	RYWEPEFY	HLA-A29:02;HLA-A30:02;HLA-C04:01;HLA-C07:01;HLA-C07:02;HLA-C14:02;HLA-C14:03	0.691487474	0.705583482	0.548907409	False
ORF10 protein	9	17	FPFTIYSLL	HLA-A68:02;HLA-B07:02;HLA-B35:01;HLA-B35:03;HLA-B42:01;HLA-B48:01;HLA-B51:01;HLA-B53:01;HLA-B54:01;HLA-B81:01;HLA-C02:02;HLA-C03:04;HLA-C06:02;HLA-C12:02	0.678969044	0.675550282	0.599134052	False
orf1a polyprotein;orf1ab polyprotein	2319	2327	TAFGLVAEW	HLA-A25:01;HLA-A32:01;HLA-A68:01;HLA-A68:02;HLA-B35:01;HLA-B35:03;HLA-B51:01;HLA-B53:01;HLA-B57:01;HLA-B57:03;HLA-B58:01;HLA-C02:02;HLA-C03:02;HLA-C06:02;HLA-C08:01;HLA-C12:02;HLA-C12:03	0.646947217	0.616098271	0.694237051	False
orf1a polyprotein;orf1ab polyprotein	3647	3655	VAYFNMVYM	HLA-B46:01;HLA-B51:01;HLA-C02:02;HLA-C03:02;HLA-C03:03;HLA-C03:04;HLA-C05:01;HLA-C08:01;HLA-C08:02;HLA-C12:02;HLA-C12:03;HLA-C17:01	0.631814973	0.639004872	0.685679026	False
orf1a polyprotein;orf1ab polyprotein	2138	2146	IANYAKPFL	HLA-B35:01;HLA-B51:01;HLA-C02:02;HLA-C03:02;HLA-C03:03;HLA-C03:04;HLA-C05:01;HLA-C08:02;HLA-C12:03;HLA-C15:02;HLA-C17:01	0.671668813	0.690191949	0.5909877	False
orf1a polyprotein;orf1ab polyprotein	2140	2148	NYAKPFLNK	HLA-A03:01;HLA-A11:01;HLA-A23:01;HLA-A24:02;HLA-A30:01;HLA-A33:03;HLA-A68:01	0.595711729	0.56882391	0.77260454	False
orf1ab polyprotein	5465	5473	TEETFKLSY	HLA-A01:01;HLA-A29:02;HLA-A36:01;HLA-B18:01;HLA-B40:01;HLA-B41:01;HLA-B44:02;HLA-B44:03;HLA-B45:01;HLA-B49:01;HLA-B50:01;HLA-C07:01	0.707167961	0.767049705	0.405684333	False
orf1a polyprotein;orf1ab polyprotein	1767	1776	AVMYMGTLSY	HLA-A01:01;HLA-A03:01;HLA-A11:01;HLA-A25:01;HLA-A29:02;HLA-A30:02;HLA-A32:01;HLA-A36:01;HLA-B15:01	0.673866244	0.749982816	0.5053111	False
orf1a polyprotein;orf1ab polyprotein	3710	3718	TLMNVLTLV	HLA-A02:01;HLA-A02:03;HLA-A02:04;HLA-A02:07;HLA-A03:01;HLA-A68:02;HLA-B13:02;HLA-C06:02	0.692917593	0.762386268	0.46129316	False
ORF9b protein	86	94	ELPDEFVVV	HLA-A02:01;HLA-A02:03;HLA-A02:04;HLA-A02:07;HLA-A25:01;HLA-A26:01;HLA-A68:02;HLA-B13:02;HLA-C01:02;HLA-C06:02	0.645963089	0.694507836	0.617641935	False
orf1a polyprotein;orf1ab polyprotein	3114	3122	FYLTNDVSF	HLA-A23:01;HLA-A24:02;HLA-A29:02;HLA-B57:01;HLA-C04:01;HLA-C07:02;HLA-C14:02;HLA-C14:03	0.643835317	0.629516978	0.677966963	False
membrane glycoprotein	15	23	KLLEQWNLV	HLA-A02:01;HLA-A02:03;HLA-A02:04;HLA-A02:07;HLA-A03:01;HLA-A30:01;HLA-A32:01;HLA-B13:02;HLA-C15:02	0.683661472	0.75717848	0.488458601	False
orf1a polyprotein;orf1ab polyprotein	3586	3594	TILTSLLVL	HLA-A02:04;HLA-A03:01;HLA-A23:01;HLA-A25:01;HLA-A32:01;HLA-B08:01;HLA-B14:02;HLA-B39:01;HLA-C03:02;HLA-C03:03;HLA-C03:04;HLA-C08:01;HLA-C15:02;HLA-C17:01	0.664770847	0.696750935	0.602503744	False
surface glycoprotein	1101	1109	HWFVTQRNF	HLA-A23:01;HLA-A24:02;HLA-B15:03;HLA-B18:01;HLA-B38:01;HLA-B53:01;HLA-B57:01;HLA-B57:03;HLA-B58:02;HLA-C04:01;HLA-C07:01;HLA-C14:02	0.698468597	0.673858728	0.57364154	False
orf1a polyprotein;orf1ab polyprotein	169	177	VTRELMREL	HLA-A25:01;HLA-A30:01;HLA-B42:01;HLA-B46:01;HLA-B57:01;HLA-B57:03;HLA-B58:02;HLA-C02:02;HLA-C03:02;HLA-C03:03;HLA-C03:04;HLA-C06:02;HLA-C12:02;HLA-C12:03;HLA-C15:02	0.626260079	0.629409295	0.690679539	False
orf1a polyprotein;orf1ab polyprotein	3373	3381	QTFSVLACY	HLA-A01:01;HLA-A03:01;HLA-A25:01;HLA-A26:01;HLA-A29:02;HLA-A30:02;HLA-A32:01;HLA-A36:01;HLA-B57:01;HLA-B58:01;HLA-C02:02;HLA-C12:02;HLA-C12:03	0.701253669	0.762876659	0.452923398	False
orf1ab polyprotein	6659	6668	SQMEIDFLEL	HLA-A02:01;HLA-A02:04;HLA-A02:07;HLA-A23:01;HLA-B15:01;HLA-B15:03;HLA-B38:01;HLA-B39:01;HLA-B48:01;HLA-C03:04;HLA-C08:01;HLA-C15:02	0.658122329	0.69029536	0.607170473	False
orf1a polyprotein;orf1ab polyprotein	1538	1546	TSNPTTFHL	HLA-A23:01;HLA-B57:03;HLA-B58:01;HLA-B58:02;HLA-C02:02;HLA-C03:03;HLA-C03:04;HLA-C07:01;HLA-C08:02;HLA-C12:03;HLA-C15:02;HLA-C17:01	0.70451386	0.714279448	0.51471601	False
orf1a polyprotein;orf1ab polyprotein	3130	3138	VMFTPLVPF	HLA-A03:01;HLA-A24:02;HLA-A29:02;HLA-A32:01;HLA-B15:01;HLA-B35:01;HLA-B46:01;HLA-B57:01;HLA-C03:02;HLA-C14:02;HLA-C14:03	0.621461618	0.65950629	0.66802616	False
membrane glycoprotein	121	129	NVPLHGTIL	HLA-A26:01;HLA-B42:01;HLA-C01:02;HLA-C05:01;HLA-C06:02;HLA-C07:02;HLA-C08:01;HLA-C17:01	0.611179277	0.62660714	0.704391648	False
membrane glycoprotein	82	90	IAMACLVGL	HLA-B35:01;HLA-B51:01;HLA-B81:01;HLA-C02:02;HLA-C03:02;HLA-C03:03;HLA-C03:04;HLA-C05:01;HLA-C08:01;HLA-C12:02;HLA-C12:03;HLA-C17:01	0.634947151	0.640426141	0.668917169	False
orf1a polyprotein;orf1ab polyprotein	2237	2245	SVCLGSLIY	HLA-A01:01;HLA-A03:01;HLA-A11:01;HLA-A26:01;HLA-A29:02;HLA-A30:02;HLA-A36:01;HLA-B15:01	0.659257793	0.729898201	0.539209506	False
orf1a polyprotein;orf1ab polyprotein	3949	3957	SSLPSYAAF	HLA-A24:02;HLA-A25:01;HLA-A30:02;HLA-A32:01;HLA-B15:01;HLA-B15:03;HLA-B46:01;HLA-B57:01;HLA-B57:03;HLA-B58:01;HLA-C02:02;HLA-C03:02;HLA-C03:03;HLA-C03:04	0.611565498	0.608532672	0.714331388	False
envelope protein	18	26	LLFLAFVVF	HLA-A02:07;HLA-A24:02;HLA-A29:02;HLA-A32:01;HLA-B15:01;HLA-B15:03;HLA-B35:01;HLA-B54:01;HLA-B57:01;HLA-C03:02;HLA-C04:01;HLA-C12:02	0.621147725	0.605380777	0.708742795	False
orf1ab polyprotein	5172	5180	KNFKSVLYY	HLA-A03:01;HLA-A29:02;HLA-A30:01;HLA-A30:02;HLA-A32:01;HLA-A36:01;HLA-B15:01;HLA-B15:03;HLA-B57:01;HLA-B58:01;HLA-C02:02;HLA-C07:01;HLA-C12:02;HLA-C15:02	0.700318948	0.7233418	0.484964646	False
orf1a polyprotein;orf1ab polyprotein	3099	3107	SFLPGVYSV	HLA-A02:01;HLA-A02:04;HLA-A23:01;HLA-A24:02;HLA-A30:01;HLA-B39:01;HLA-B52:01;HLA-C14:02;HLA-C14:03	0.653930128	0.676319728	0.610629743	False
orf1a polyprotein;orf1ab polyprotein	2225	2234	KLINIIIWFL	HLA-A02:01;HLA-A02:03;HLA-A02:04;HLA-A02:07;HLA-A03:01;HLA-A30:01;HLA-A32:01;HLA-A68:02;HLA-B13:02;HLA-B48:01	0.693614077	0.756331136	0.457372086	False
orf1a polyprotein;orf1ab polyprotein	701	709	KALNLGETF	HLA-A23:01;HLA-A24:02;HLA-A29:02;HLA-A32:01;HLA-B15:01;HLA-B15:03;HLA-B35:01;HLA-B53:01;HLA-B57:01;HLA-B57:03;HLA-B58:01;HLA-B58:02;HLA-C02:02;HLA-C03:03;HLA-C12:03	0.670775016	0.648809477	0.61545548	False
orf1a polyprotein;orf1ab polyprotein	1637	1645	TTDPSFLGR	HLA-A01:01;HLA-A03:01;HLA-A11:01;HLA-A31:01;HLA-A33:03;HLA-A36:01;HLA-A68:01;HLA-A74:01	0.623362478	0.665557544	0.642766664	False
orf1a polyprotein;orf1ab polyprotein	3969	3977	ANGDSEVVL	HLA-B15:09;HLA-B38:01;HLA-B39:01;HLA-B40:01;HLA-B48:01;HLA-B81:01;HLA-C07:01;HLA-C07:02;HLA-C08:01;HLA-C12:02;HLA-C15:02	0.604851671	0.642991055	0.680891997	False
orf1ab polyprotein	5129	5137	VDTDFVNEF	HLA-A23:01;HLA-A24:02;HLA-B15:01;HLA-B18:01;HLA-B46:01;HLA-B53:01;HLA-C02:02;HLA-C03:02;HLA-C07:02;HLA-C12:02;HLA-C14:03	0.609791204	0.596469459	0.714219417	False
ORF3a protein	236	244	IVDEPEEHV	HLA-A02:01;HLA-A02:07;HLA-A36:01;HLA-A68:02;HLA-B15:09;HLA-C04:01;HLA-C05:01;HLA-C08:01;HLA-C08:02	0.692394685	0.717332784	0.492504618	False
ORF7b	10	18	YLCFLAFLL	HLA-A01:01;HLA-A02:01;HLA-A02:04;HLA-A02:07;HLA-C06:02;HLA-C17:01	0.684009549	0.770458123	0.427183883	False
orf1a polyprotein;orf1ab polyprotein	1634	1642	YYHTTDPSF	HLA-A23:01;HLA-A24:02;HLA-A29:02;HLA-B35:03;HLA-C04:01;HLA-C07:02;HLA-C14:02;HLA-C14:03	0.633711135	0.61182829	0.680192549	False
orf1a polyprotein;orf1ab polyprotein	1351	1359	SAFYILPSI	HLA-A02:03;HLA-A02:04;HLA-A68:02;HLA-B13:02;HLA-B35:01;HLA-B35:03;HLA-B51:01;HLA-B52:01;HLA-B53:01;HLA-B54:01;HLA-B57:01;HLA-C02:02;HLA-C03:02;HLA-C06:02;HLA-C08:01;HLA-C12:02;HLA-C12:03	0.61044309	0.582898624	0.720434665	False
membrane glycoprotein	211	219	SSSSDNIAL	HLA-A68:02;HLA-B15:09;HLA-B35:03;HLA-B38:01;HLA-B39:01;HLA-B48:01;HLA-B57:03;HLA-B81:01;HLA-C01:02;HLA-C02:02;HLA-C03:03;HLA-C03:04;HLA-C08:01;HLA-C08:02;HLA-C12:03;HLA-C15:02;HLA-C17:01	0.614258239	0.583224582	0.718646903	False
surface glycoprotein	84	92	LPFNDGVYF	HLA-A24:02;HLA-A29:02;HLA-B07:02;HLA-B35:01;HLA-B35:03;HLA-B38:01;HLA-B42:01;HLA-B51:01;HLA-B53:01;HLA-B54:01;HLA-B57:01;HLA-B81:01;HLA-C02:02	0.660255501	0.669256732	0.593361915	False
orf1a polyprotein;orf1ab polyprotein	2516	2524	HSLSHFVNL	HLA-A30:01;HLA-A68:02;HLA-B48:01;HLA-B57:03;HLA-B58:01;HLA-B58:02;HLA-C03:02;HLA-C03:03;HLA-C03:04;HLA-C07:01;HLA-C08:01;HLA-C12:02;HLA-C15:02;HLA-C17:01	0.614098743	0.587183024	0.711450767	False
orf1a polyprotein;orf1ab polyprotein	4122	4131	LAWPLIVTAL	HLA-B35:01;HLA-B35:03;HLA-B51:01;HLA-B54:01;HLA-B81:01;HLA-C01:02;HLA-C03:02;HLA-C03:03;HLA-C03:04;HLA-C08:01;HLA-C08:02;HLA-C12:02;HLA-C17:01	0.560985451	0.52961471	0.791283893	False
orf1ab polyprotein	4912	4920	SYEDQDALF	HLA-A23:01;HLA-A24:02;HLA-A29:02;HLA-B38:01;HLA-C04:01;HLA-C07:02;HLA-C14:02;HLA-C14:03	0.636111995	0.616679136	0.66727166	False
surface glycoprotein	135	143	FCNDPFLGV	HLA-A02:01;HLA-A02:03;HLA-A02:04;HLA-A02:07;HLA-B51:01;HLA-B54:01;HLA-C02:02;HLA-C03:02;HLA-C03:04;HLA-C15:02	0.626456257	0.665655577	0.633541453	False
orf1a polyprotein;orf1ab polyprotein	1057	1065	VVNAANVYL	HLA-A02:04;HLA-A02:07;HLA-A68:02;HLA-B81:01;HLA-C02:02;HLA-C03:03;HLA-C03:04;HLA-C04:01;HLA-C05:01;HLA-C08:02;HLA-C15:02;HLA-C17:01	0.697037454	0.685858187	0.529539923	False
orf1a polyprotein;orf1ab polyprotein	3685	3694	YASAVVLLIL	HLA-A68:02;HLA-B35:01;HLA-B35:03;HLA-B51:01;HLA-C02:02;HLA-C03:02;HLA-C03:03;HLA-C03:04;HLA-C08:01;HLA-C12:02;HLA-C12:03;HLA-C15:02;HLA-C17:01	0.605086409	0.580314673	0.724941081	False
orf1a polyprotein;orf1ab polyprotein	954	962	DYQGKPLEF	HLA-A23:01;HLA-A24:02;HLA-A25:01;HLA-A29:02;HLA-C04:01;HLA-C07:02;HLA-C14:02;HLA-C14:03	0.635637789	0.617065208	0.664698386	False
orf1a polyprotein;orf1ab polyprotein	3098	3105	YSFLPGVY	HLA-A01:01;HLA-A30:02;HLA-B15:01;HLA-B15:03;HLA-B46:01;HLA-B58:02;HLA-C02:02;HLA-C03:02;HLA-C07:02;HLA-C12:02;HLA-C12:03	0.63472468	0.669354367	0.617042174	False
orf1ab polyprotein	7031	7040	NTNPIQLSSY	HLA-A01:01;HLA-A03:01;HLA-A25:01;HLA-A26:01;HLA-A29:02;HLA-A30:02;HLA-A32:01;HLA-A36:01;HLA-B15:01;HLA-B46:01;HLA-B57:01;HLA-C02:02	0.69256047	0.764943454	0.415658982	False
surface glycoprotein	915	922	VLYENQKL	HLA-A02:01;HLA-A02:03;HLA-A02:04;HLA-A02:07;HLA-B13:02;HLA-B14:02;HLA-B58:02;HLA-C05:01;HLA-C06:02;HLA-C08:02;HLA-C17:01	0.686451588	0.738830134	0.443693959	False
surface glycoprotein	507	515	PYRVVVLSF	HLA-A23:01;HLA-A24:02;HLA-B46:01;HLA-C07:01;HLA-C07:02;HLA-C14:02;HLA-C14:03	0.61468402	0.63750979	0.667133636	False
orf1ab polyprotein	5268	5275	EYADVFHL	HLA-A23:01;HLA-A24:02;HLA-A68:02;HLA-B39:01;HLA-C07:01;HLA-C07:02;HLA-C14:02;HLA-C14:03	0.634264793	0.651059532	0.632614796	False
orf1a polyprotein;orf1ab polyprotein	1598	1606	YLDGADVTK	HLA-A01:01;HLA-A02:01;HLA-A02:07;HLA-C05:01;HLA-C08:02	0.687647241	0.785712514	0.358768421	False
surface glycoprotein	109	118	TLDSKTQSLL	HLA-A01:01;HLA-A02:01;HLA-A02:07;HLA-C05:01;HLA-C08:02	0.687647241	0.785712514	0.358768421	False
orf1ab polyprotein	5380	5388	DVTDVTQLY	HLA-A01:01;HLA-A25:01;HLA-A26:01;HLA-A29:02;HLA-A30:02;HLA-A32:01;HLA-A36:01;HLA-A68:01;HLA-A68:02;HLA-B15:01;HLA-B18:01;HLA-B35:01;HLA-B53:01;HLA-B57:01;HLA-C02:02	0.711820992	0.739281241	0.398109583	False
orf1a polyprotein;orf1ab polyprotein	1907	1914	FTEQPIDL	HLA-A01:01;HLA-C03:03;HLA-C03:04;HLA-C04:01;HLA-C05:01;HLA-C08:02	0.683440863	0.72963897	0.461479539	False
orf1ab polyprotein	4625	4633	VVDSYYSLL	HLA-A01:01;HLA-A02:07;HLA-A36:01;HLA-C02:02;HLA-C03:03;HLA-C04:01;HLA-C05:01;HLA-C08:01;HLA-C08:02;HLA-C17:01	0.683035202	0.695846145	0.512129594	False
ORF8 protein	104	111	FYEDFLEY	HLA-A01:01;HLA-A29:02;HLA-A36:01;HLA-C03:02;HLA-C04:01;HLA-C07:02;HLA-C14:02;HLA-C14:03	0.639390254	0.661509733	0.614067321	False
surface glycoprotein	983	991	RLDKVEAEV	HLA-A02:01;HLA-A02:03;HLA-A02:07;HLA-A36:01;HLA-B13:02;HLA-C04:01;HLA-C05:01;HLA-C08:02	0.683662858	0.725489374	0.45935898	False
ORF3a protein	44	52	GWLIVGVAL	HLA-A23:01;HLA-B08:01;HLA-B14:02;HLA-B15:03;HLA-B15:09;HLA-B27:05;HLA-B38:01;HLA-B39:01;HLA-B40:01;HLA-B40:02;HLA-B48:01;HLA-B81:01;HLA-C03:03;HLA-C03:04;HLA-C08:01;HLA-C14:02;HLA-C14:03	0.62212593	0.644449535	0.644875241	False
surface glycoprotein	898	906	FAMQMAYRF	HLA-A29:02;HLA-B35:01;HLA-B35:03;HLA-B53:01;HLA-B57:03;HLA-B58:01;HLA-C02:02;HLA-C03:02;HLA-C03:03;HLA-C03:04;HLA-C05:01;HLA-C12:02;HLA-C12:03;HLA-C17:01	0.651764663	0.647208094	0.600393834	False
orf1ab polyprotein	6087	6095	VRIKIVQML	HLA-A23:01;HLA-B14:02;HLA-B27:05;HLA-B38:01;HLA-B39:01;HLA-C06:02;HLA-C07:01;HLA-C07:02	0.673511117	0.72398198	0.469963981	False
membrane glycoprotein	39	46	YANRNRFL	HLA-B58:02;HLA-C02:02;HLA-C03:02;HLA-C03:03;HLA-C03:04;HLA-C05:01;HLA-C06:02;HLA-C08:02;HLA-C12:03;HLA-C17:01	0.672336633	0.702116277	0.51071374	False
ORF7b	9	16	FYLCFLAF	HLA-A23:01;HLA-A24:02;HLA-C03:02;HLA-C04:01;HLA-C07:02;HLA-C14:02;HLA-C14:03	0.601818586	0.570119913	0.71436959	False
orf1ab polyprotein	6302	6309	FTDGVCLF	HLA-A01:01;HLA-C02:02;HLA-C03:03;HLA-C04:01;HLA-C05:01;HLA-C08:02;HLA-C12:03;HLA-C17:01	0.708367381	0.738801272	0.388400323	False
orf1a polyprotein;orf1ab polyprotein	4094	4102	ALWEIQQVV	HLA-A02:01;HLA-A02:03;HLA-A02:04;HLA-A02:07;HLA-A30:01;HLA-A32:01;HLA-B13:02;HLA-B40:02;HLA-B48:01;HLA-B50:01;HLA-C06:02;HLA-C12:02	0.638088234	0.680592413	0.576147372	False
orf1a polyprotein;orf1ab polyprotein	1235	1243	CVEEVTTTL	HLA-A02:07;HLA-A68:02;HLA-B35:03;HLA-B38:01;HLA-B42:01;HLA-B48:01;HLA-B81:01;HLA-C03:03;HLA-C03:04;HLA-C04:01;HLA-C05:01;HLA-C08:01;HLA-C08:02	0.650389374	0.641379865	0.603423627	False
orf1a polyprotein;orf1ab polyprotein	1004	1012	TIVEVQPQL	HLA-A02:01;HLA-A02:04;HLA-A02:07;HLA-A23:01;HLA-A68:02;HLA-B15:09;HLA-B35:03;HLA-B42:01;HLA-B81:01;HLA-C03:03;HLA-C03:04;HLA-C08:01;HLA-C17:01	0.658857297	0.672554157	0.567551674	False
orf1ab polyprotein	4677	4686	RYFKYWDQTY	HLA-A23:01;HLA-A29:02;HLA-A30:02;HLA-A32:01;HLA-B15:01;HLA-B15:03;HLA-B58:01;HLA-C07:01;HLA-C07:02;HLA-C14:02;HLA-C14:03	0.658799408	0.678423532	0.548487649	False
orf1ab polyprotein	6801	6809	QAWQPGVAM	HLA-B07:02;HLA-B35:01;HLA-B35:03;HLA-B46:01;HLA-C03:02;HLA-C03:04;HLA-C05:01;HLA-C08:01;HLA-C08:02;HLA-C12:03	0.621244101	0.662987356	0.60784354	False
ORF3a protein	101	109	LEAPFLYLY	HLA-A01:01;HLA-A29:02;HLA-A30:02;HLA-A36:01;HLA-B15:01;HLA-B18:01;HLA-B35:01;HLA-B41:01;HLA-B44:02;HLA-B44:03;HLA-B45:01;HLA-B50:01;HLA-B57:01	0.692874066	0.75002918	0.383253947	False
envelope protein	19	27	LFLAFVVFL	HLA-A02:04;HLA-A23:01;HLA-A24:02;HLA-B35:01;HLA-B51:01;HLA-C04:01;HLA-C06:02;HLA-C14:02;HLA-C14:03	0.629326134	0.596183434	0.666103261	False
orf1ab polyprotein	4701	4709	HCANFNVLF	HLA-A23:01;HLA-A24:02;HLA-A29:02;HLA-B15:01;HLA-B15:09;HLA-B35:01;HLA-B38:01;HLA-B39:01;HLA-B44:02;HLA-B48:01;HLA-B53:01;HLA-B57:01;HLA-B57:03;HLA-B58:01;HLA-C02:02	0.654786497	0.653784246	0.5820636	False
orf1ab polyprotein	7029	7037	WRNTNPIQL	HLA-B14:02;HLA-B15:09;HLA-B27:05;HLA-B38:01;HLA-B39:01;HLA-C06:02;HLA-C07:01;HLA-C07:02;HLA-C17:01	0.671265869	0.720861639	0.469559419	False
orf1ab polyprotein	6412	6419	HANEYRLY	HLA-A30:02;HLA-A36:01;HLA-B35:01;HLA-B46:01;HLA-B53:01;HLA-B57:01;HLA-B58:01;HLA-B58:02;HLA-C02:02;HLA-C03:02;HLA-C06:02;HLA-C07:01;HLA-C12:03	0.663702354	0.663844585	0.564653588	False
orf1a polyprotein;orf1ab polyprotein	1535	1544	VYYTSNPTTF	HLA-A23:01;HLA-A24:02;HLA-A29:02;HLA-C04:01;HLA-C07:02;HLA-C14:02;HLA-C14:03	0.623033633	0.599403508	0.664236533	False
surface glycoprotein	236	244	TRFQTLLAL	HLA-A02:03;HLA-A02:04;HLA-B14:02;HLA-B15:09;HLA-B27:05;HLA-B38:01;HLA-B39:01;HLA-C06:02;HLA-C07:01;HLA-C07:02	0.65391841	0.714445483	0.500699227	False
surface glycoprotein	504	513	GYQPYRVVVL	HLA-A23:01;HLA-A24:02;HLA-B48:01;HLA-C07:01;HLA-C07:02;HLA-C14:02;HLA-C14:03	0.61573606	0.637879435	0.637611933	False
orf1a polyprotein;orf1ab polyprotein	2802	2809	FSSEIIGY	HLA-A01:01;HLA-A36:01;HLA-B15:01;HLA-B46:01;HLA-B58:02;HLA-C02:02;HLA-C03:02;HLA-C07:02;HLA-C12:02;HLA-C12:03	0.611922759	0.661279227	0.616352296	False
membrane glycoprotein	38	46	AYANRNRFL	HLA-A23:01;HLA-A24:02;HLA-B44:02;HLA-C06:02;HLA-C07:02;HLA-C14:02;HLA-C14:03	0.604281387	0.63055753	0.653576153	False
orf1ab polyprotein	5622	5629	YYPSARIV	HLA-B51:01;HLA-C04:01;HLA-C06:02;HLA-C07:02;HLA-C14:02;HLA-C14:03	0.624181275	0.62682536	0.632651215	False
membrane glycoprotein	95	103	YFIASFRLF	HLA-A23:01;HLA-A24:02;HLA-A29:02;HLA-B15:03;HLA-B35:01;HLA-B38:01;HLA-B53:01;HLA-C02:02;HLA-C03:03;HLA-C04:01;HLA-C14:02;HLA-C14:03	0.660920546	0.60757542	0.612839886	False
orf1a polyprotein;orf1ab polyprotein	1433	1441	SLINTLNDL	HLA-A02:01;HLA-A02:03;HLA-A02:04;HLA-A02:07;HLA-A23:01;HLA-A26:01;HLA-B13:02;HLA-B15:01;HLA-C01:02;HLA-C17:01	0.630156426	0.669277804	0.587019859	False
orf1a polyprotein;orf1ab polyprotein	669	678	KEIKESVQTF	HLA-A23:01;HLA-A32:01;HLA-B15:01;HLA-B15:03;HLA-B18:01;HLA-B37:01;HLA-B40:01;HLA-B40:02;HLA-B41:01;HLA-B44:02;HLA-B44:03;HLA-B49:01;HLA-B50:01;HLA-B57:01;HLA-B57:03;HLA-B58:01;HLA-B58:02	0.657522537	0.675811896	0.538457521	False
nucleocapsid phosphoprotein	49	56	TASWFTAL	HLA-B08:01;HLA-B35:03;HLA-C01:02;HLA-C03:02;HLA-C03:03;HLA-C03:04;HLA-C08:01;HLA-C08:02;HLA-C12:03;HLA-C17:01	0.579767734	0.597787336	0.707653032	False
orf1ab polyprotein	4791	4799	AALTNNVAF	HLA-A29:02;HLA-B15:03;HLA-B35:01;HLA-B35:03;HLA-B44:02;HLA-B46:01;HLA-B57:01;HLA-B57:03;HLA-B58:01;HLA-B81:01;HLA-C02:02;HLA-C03:02;HLA-C03:03;HLA-C03:04;HLA-C14:02;HLA-C14:03	0.608892135	0.611355399	0.659837839	False
orf1a polyprotein;orf1ab polyprotein	3194	3201	RSDVLLPL	HLA-A01:01;HLA-A36:01;HLA-B58:01;HLA-C03:02;HLA-C03:03;HLA-C04:01;HLA-C05:01;HLA-C08:02;HLA-C15:02	0.64837467	0.676637299	0.549361871	False
orf1a polyprotein;orf1ab polyprotein	3686	3694	ASAVVLLIL	HLA-B48:01;HLA-B57:03;HLA-B58:01;HLA-B58:02;HLA-B81:01;HLA-C03:02;HLA-C03:03;HLA-C03:04;HLA-C06:02;HLA-C08:01;HLA-C12:02;HLA-C12:03;HLA-C15:02;HLA-C17:01	0.564654105	0.535721737	0.751253645	False
orf1ab polyprotein	6851	6859	YLNTLTLAV	HLA-A02:01;HLA-A02:03;HLA-A02:04;HLA-A02:07;HLA-B13:02;HLA-C01:02;HLA-C06:02;HLA-C15:02	0.601215636	0.653287493	0.628838188	False
orf1ab polyprotein	4825	4833	SSVELKHFF	HLA-A24:02;HLA-A26:01;HLA-A30:02;HLA-B44:02;HLA-B53:01;HLA-B57:01;HLA-B57:03;HLA-B58:01;HLA-B58:02;HLA-C02:02;HLA-C03:03;HLA-C12:02;HLA-C12:03;HLA-C15:02	0.61315123	0.606243847	0.657297963	False
orf1a polyprotein;orf1ab polyprotein	739	747	IIFLEGETL	HLA-A32:01;HLA-B15:01;HLA-B15:09;HLA-B35:01;HLA-B38:01;HLA-B40:01;HLA-B57:03;HLA-B58:01;HLA-C03:02;HLA-C03:03;HLA-C03:04;HLA-C08:01;HLA-C08:02	0.58064989	0.600243145	0.687250189	False
orf1a polyprotein;orf1ab polyprotein	3104	3111	VYSVIYLY	HLA-A24:02;HLA-A29:02;HLA-A30:02;HLA-A36:01;HLA-C04:01;HLA-C07:02;HLA-C14:02;HLA-C14:03	0.615190704	0.592349026	0.66283253	False
orf1a polyprotein;orf1ab polyprotein	882	890	TLQPVSELL	HLA-A02:01;HLA-A02:04;HLA-A02:07;HLA-A23:01;HLA-A24:02;HLA-A68:02;HLA-B15:09;HLA-B38:01;HLA-C17:01	0.649076297	0.669320692	0.547441765	False
orf1ab polyprotein	6501	6509	LPVNVAFEL	HLA-B07:02;HLA-B35:01;HLA-B35:03;HLA-B42:01;HLA-B51:01;HLA-B53:01;HLA-B54:01;HLA-B81:01;HLA-C03:04;HLA-C07:01	0.664549448	0.692024242	0.495301602	False
orf1a polyprotein;orf1ab polyprotein	3725	3733	NALDQAISM	HLA-B35:01;HLA-B35:03;HLA-B51:01;HLA-C02:02;HLA-C03:02;HLA-C03:03;HLA-C03:04;HLA-C08:01;HLA-C12:02;HLA-C12:03;HLA-C14:02;HLA-C14:03	0.563696654	0.557257952	0.734498789	False
orf1ab polyprotein	6486	6495	KVDGVDVELF	HLA-A01:01;HLA-A02:07;HLA-A29:02;HLA-A32:01;HLA-A36:01;HLA-B38:01;HLA-B53:01;HLA-B57:01;HLA-B57:03;HLA-B58:01;HLA-C04:01;HLA-C05:01;HLA-C08:02	0.681122945	0.703866542	0.45185804	False
ORF3a protein	7	15	IFTIGTVTL	HLA-A23:01;HLA-A24:02;HLA-B15:09;HLA-B38:01;HLA-B53:01;HLA-B81:01;HLA-C03:04;HLA-C04:01;HLA-C08:01;HLA-C08:02;HLA-C14:02;HLA-C14:03	0.617611708	0.556524002	0.687251447	False
orf1a polyprotein;orf1ab polyprotein	3732	3740	SMWALIISV	HLA-A02:01;HLA-A02:03;HLA-A02:04;HLA-A02:07;HLA-A30:01;HLA-A68:02;HLA-B13:02;HLA-B52:01;HLA-B54:01;HLA-B55:01;HLA-C06:02;HLA-C12:02	0.628055609	0.664024663	0.578275196	False
orf1a polyprotein;orf1ab polyprotein	1451	1459	GYVTHGLNL	HLA-A23:01;HLA-A24:02;HLA-C07:01;HLA-C07:02;HLA-C14:02;HLA-C14:03	0.611461072	0.63750979	0.622384567	False
orf1a polyprotein;orf1ab polyprotein	1905	1914	SYFTEQPIDL	HLA-A23:01;HLA-A24:02;HLA-C07:01;HLA-C07:02;HLA-C14:02;HLA-C14:03	0.611461072	0.63750979	0.622384567	False
ORF3a protein	205	214	SYFTSDYYQL	HLA-A23:01;HLA-A24:02;HLA-C07:01;HLA-C07:02;HLA-C14:02;HLA-C14:03	0.611461072	0.63750979	0.622384567	False
orf1a polyprotein;orf1ab polyprotein	544	552	VRSIFSRTL	HLA-B14:02;HLA-B15:09;HLA-B27:05;HLA-B38:01;HLA-B39:01;HLA-B58:02;HLA-C06:02;HLA-C07:01;HLA-C07:02	0.656766075	0.714483338	0.467560072	False
nucleocapsid phosphoprotein	267	274	AYNVTQAF	HLA-A24:02;HLA-B37:01;HLA-B46:01;HLA-C04:01;HLA-C07:02;HLA-C14:02;HLA-C14:03	0.57681744	0.564018835	0.710635845	False
orf1ab polyprotein	5133	5140	FVNEFYAY	HLA-A01:01;HLA-A29:02;HLA-A30:02;HLA-B15:01;HLA-B18:01;HLA-B46:01;HLA-C02:02;HLA-C03:02;HLA-C07:02	0.632592947	0.67981424	0.549440224	False
orf1ab polyprotein	4558	4566	VENPDILRV	HLA-A02:03;HLA-A02:04;HLA-B13:02;HLA-B18:01;HLA-B37:01;HLA-B40:01;HLA-B40:02;HLA-B41:01;HLA-B44:02;HLA-B44:03;HLA-B45:01;HLA-B49:01;HLA-B50:01;HLA-B52:01;HLA-C06:02;HLA-C15:02	0.621530011	0.647071955	0.596457937	False
surface glycoprotein	574	582	DAVRDPQTL	HLA-A25:01;HLA-A68:02;HLA-B14:02;HLA-B35:01;HLA-B35:03;HLA-B51:01;HLA-B53:01;HLA-B57:03;HLA-C02:02;HLA-C03:03;HLA-C03:04;HLA-C08:01;HLA-C12:02;HLA-C12:03;HLA-C17:01	0.635733151	0.606962448	0.6217409	False
surface glycoprotein	24	32	LPPAYTNSF	HLA-A24:02;HLA-B07:02;HLA-B35:01;HLA-B35:03;HLA-B42:01;HLA-B51:01;HLA-B53:01;HLA-B81:01;HLA-C01:02;HLA-C14:02;HLA-C14:03	0.591801476	0.581426011	0.693014955	False
orf1a polyprotein;orf1ab polyprotein	3768	3776	IFFITGNTL	HLA-A23:01;HLA-A24:02;HLA-B14:02;HLA-B15:09;HLA-B38:01;HLA-B52:01;HLA-C03:04;HLA-C04:01;HLA-C08:01;HLA-C14:02;HLA-C14:03	0.595927635	0.547041796	0.7063004	False
orf1a polyprotein;orf1ab polyprotein	1707	1715	AANFCALIL	HLA-B35:01;HLA-B35:03;HLA-C02:02;HLA-C03:02;HLA-C03:03;HLA-C03:04;HLA-C08:01;HLA-C08:02;HLA-C12:02;HLA-C12:03;HLA-C15:02;HLA-C17:01	0.592994942	0.576082615	0.687760286	False
orf1a polyprotein;orf1ab polyprotein	2335	2343	TRFFYVLGL	HLA-B14:02;HLA-B27:05;HLA-B38:01;HLA-B39:01;HLA-C06:02;HLA-C07:01;HLA-C07:02	0.651950363	0.714445483	0.467560072	False
orf1ab polyprotein	4756	4764	SRLSFKELL	HLA-B14:02;HLA-B27:05;HLA-B38:01;HLA-B39:01;HLA-C06:02;HLA-C07:01;HLA-C07:02	0.651950363	0.714445483	0.467560072	False
orf1a polyprotein;orf1ab polyprotein	852	860	VLNEKCSAY	HLA-A01:01;HLA-A03:01;HLA-A25:01;HLA-A29:02;HLA-A30:02;HLA-A32:01;HLA-A36:01;HLA-B15:01;HLA-B15:03;HLA-B46:01;HLA-C01:02;HLA-C14:03	0.65004656	0.712757313	0.510979531	False
orf1a polyprotein;orf1ab polyprotein	2326	2334	EWFLAYILF	HLA-A23:01;HLA-A24:02;HLA-B18:01;HLA-B35:01;HLA-B38:01;HLA-B44:02;HLA-B44:03;HLA-C04:01	0.654005162	0.652502946	0.553905138	False
surface glycoprotein	204	212	YSKHTPINL	HLA-B46:01;HLA-C02:02;HLA-C03:03;HLA-C03:04;HLA-C06:02;HLA-C08:01;HLA-C12:02;HLA-C12:03;HLA-C15:02;HLA-C17:01	0.582149922	0.578305616	0.689008015	False
orf1a polyprotein;orf1ab polyprotein	3836	3844	DAFKLNIKL	HLA-A26:01;HLA-A68:01;HLA-A68:02;HLA-B14:02;HLA-B18:01;HLA-B35:01;HLA-B35:03;HLA-B48:01;HLA-B51:01;HLA-B53:01;HLA-B57:03;HLA-B81:01;HLA-C02:02;HLA-C06:02;HLA-C12:02;HLA-C12:03;HLA-C17:01	0.66888991	0.635523703	0.544578791	False
orf1ab polyprotein	5640	5648	ALCEKALKY	HLA-A01:01;HLA-A03:01;HLA-A25:01;HLA-A26:01;HLA-A29:02;HLA-A30:01;HLA-A30:02;HLA-A32:01;HLA-A36:01;HLA-B15:01;HLA-B15:03;HLA-B46:01	0.677356868	0.737694062	0.412430447	False
ORF6 protein	20	29	RTFKVSIWNL	HLA-A03:01;HLA-A11:01;HLA-A30:01;HLA-A32:01;HLA-A68:02;HLA-A74:01;HLA-B48:01;HLA-B57:03;HLA-B58:01;HLA-B58:02;HLA-B81:01;HLA-C07:01;HLA-C15:02	0.632016766	0.633796857	0.592942873	False
orf1a polyprotein;orf1ab polyprotein	3209	3217	ALYNKYKYF	HLA-A02:03;HLA-A03:01;HLA-A24:02;HLA-A25:01;HLA-A26:01;HLA-A29:02;HLA-A32:01;HLA-B15:01;HLA-B15:03;HLA-B46:01;HLA-C12:02	0.595500353	0.63178212	0.628444697	False
orf1a polyprotein;orf1ab polyprotein	31	39	FGDSVEEVL	HLA-A02:07;HLA-B15:09;HLA-B35:01;HLA-B35:03;HLA-B38:01;HLA-B48:01;HLA-C03:04;HLA-C04:01;HLA-C05:01;HLA-C08:01;HLA-C08:02;HLA-C17:01	0.643709953	0.626148399	0.5845331	False
orf1ab polyprotein	6893	6901	LVDSDLNDF	HLA-A01:01;HLA-A02:07;HLA-B35:01;HLA-B53:01;HLA-B57:01;HLA-B57:03;HLA-C02:02;HLA-C04:01;HLA-C05:01;HLA-C08:02	0.687656263	0.705504062	0.414755574	False
nucleocapsid phosphoprotein	299	307	KHWPQIAQF	HLA-A23:01;HLA-A24:02;HLA-A32:01;HLA-B15:01;HLA-B15:03;HLA-B15:09;HLA-B37:01;HLA-B38:01;HLA-B39:01;HLA-B48:01;HLA-B53:01;HLA-B57:01;HLA-B57:03;HLA-B58:01;HLA-C07:01	0.635179165	0.632725008	0.587607326	False
orf1ab polyprotein	4920	4928	FAYTKRNVI	HLA-B35:03;HLA-B51:01;HLA-B53:01;HLA-C02:02;HLA-C03:02;HLA-C03:04;HLA-C06:02;HLA-C08:01;HLA-C08:02;HLA-C12:02;HLA-C12:03	0.599736916	0.584350146	0.664530315	False
orf1ab polyprotein	5845	5852	VASKILGL	HLA-B08:01;HLA-B51:01;HLA-B81:01;HLA-C02:02;HLA-C03:02;HLA-C03:03;HLA-C03:04;HLA-C08:01;HLA-C12:03;HLA-C15:02;HLA-C17:01	0.59872115	0.612859179	0.645115545	False
orf1a polyprotein;orf1ab polyprotein	3087	3094	MSFTVLCL	HLA-B52:01;HLA-C03:02;HLA-C03:03;HLA-C03:04;HLA-C07:01;HLA-C12:02;HLA-C12:03;HLA-C15:02;HLA-C17:01	0.605652355	0.632972822	0.610929037	False
orf1a polyprotein;orf1ab polyprotein	3923	3930	GAVDINKL	HLA-B40:02;HLA-B48:01;HLA-B58:02;HLA-C02:02;HLA-C03:02;HLA-C03:03;HLA-C03:04;HLA-C06:02;HLA-C08:01;HLA-C12:02;HLA-C12:03;HLA-C17:01	0.586237936	0.565000702	0.689423505	False
orf1a polyprotein;orf1ab polyprotein	1768	1776	VMYMGTLSY	HLA-A01:01;HLA-A03:01;HLA-A29:02;HLA-A30:02;HLA-A32:01;HLA-A36:01;HLA-B15:01;HLA-B15:03;HLA-B46:01;HLA-B53:01;HLA-C03:02;HLA-C12:02;HLA-C14:02;HLA-C14:03	0.647391931	0.691548376	0.528918844	False
orf1a polyprotein;orf1ab polyprotein	601	608	ITGGVVQL	HLA-B57:03;HLA-B58:01;HLA-C05:01;HLA-C06:02;HLA-C07:01;HLA-C08:01;HLA-C12:03;HLA-C15:02;HLA-C17:01	0.639853512	0.672925181	0.527982643	False
surface glycoprotein	718	726	FTISVTTEI	HLA-A02:03;HLA-A25:01;HLA-A26:01;HLA-A68:02;HLA-B53:01;HLA-B57:03;HLA-B58:02;HLA-C02:02;HLA-C03:02;HLA-C03:03;HLA-C03:04;HLA-C08:01;HLA-C08:02;HLA-C12:02;HLA-C12:03;HLA-C15:02	0.589759346	0.556578993	0.689927626	False
orf1a polyprotein;orf1ab polyprotein	835	843	GYKSVNITF	HLA-A23:01;HLA-A24:02;HLA-A29:02;HLA-A30:01;HLA-B15:01;HLA-B15:03;HLA-B57:01;HLA-B57:03;HLA-C07:02;HLA-C14:02;HLA-C14:03	0.599297541	0.594158597	0.647458681	False
surface glycoprotein	880	888	GTITSGWTF	HLA-A23:01;HLA-A24:02;HLA-A25:01;HLA-A26:01;HLA-A29:02;HLA-A32:01;HLA-B15:01;HLA-B15:03;HLA-B38:01;HLA-B57:01;HLA-B57:03;HLA-B58:01;HLA-B58:02;HLA-C02:02;HLA-C03:03	0.623912199	0.619164895	0.596507581	False
membrane glycoprotein	37	46	FAYANRNRFL	HLA-B35:03;HLA-C02:02;HLA-C03:03;HLA-C03:04;HLA-C06:02;HLA-C08:01;HLA-C08:02;HLA-C12:02;HLA-C12:03;HLA-C17:01	0.611737189	0.616337472	0.610254884	False
orf1a polyprotein;orf1ab polyprotein	3710	3717	TLMNVLTL	HLA-A02:01;HLA-A02:03;HLA-A02:04;HLA-B08:01;HLA-C01:02;HLA-C08:02;HLA-C14:02;HLA-C14:03;HLA-C17:01	0.626354102	0.683408219	0.528324105	False
orf1a polyprotein;orf1ab polyprotein	3639	3647	FLLPSLATV	HLA-A02:01;HLA-A02:03;HLA-A02:04;HLA-A02:07;HLA-B08:01;HLA-B13:02;HLA-B51:01;HLA-B54:01;HLA-C03:02	0.607688168	0.68149419	0.54130138	False
orf1ab polyprotein	4559	4567	ENPDILRVY	HLA-A25:01;HLA-A26:01;HLA-A30:02;HLA-B15:01;HLA-B44:02;HLA-B44:03;HLA-C06:02;HLA-C07:02	0.625222326	0.679665871	0.519357312	False
orf1ab polyprotein	6214	6221	RVDWTIEY	HLA-A01:01;HLA-A30:02;HLA-A36:01;HLA-B15:01;HLA-B58:01;HLA-C02:02;HLA-C05:01;HLA-C07:01;HLA-C08:02	0.683646419	0.743395361	0.338640929	False
orf1a polyprotein;orf1ab polyprotein	2854	2862	IAAVITREV	HLA-A68:02;HLA-B35:03;HLA-B46:01;HLA-B51:01;HLA-B53:01;HLA-C02:02;HLA-C03:02;HLA-C03:04;HLA-C06:02;HLA-C12:02;HLA-C12:03;HLA-C15:02	0.586400691	0.567032635	0.675906473	False
orf1ab polyprotein	6094	6102	MLSDTLKNL	HLA-A02:01;HLA-A02:03;HLA-A02:04;HLA-A02:07;HLA-A32:01;HLA-C01:02;HLA-C06:02;HLA-C17:01	0.610190967	0.656688387	0.573117832	False
surface glycoprotein	267	275	VGYLQPRTF	HLA-A24:02;HLA-B15:01;HLA-B15:03;HLA-B51:01;HLA-B52:01;HLA-B57:01;HLA-B58:02;HLA-C03:02;HLA-C07:01;HLA-C12:02	0.585860983	0.60266899	0.647449642	False
orf1a polyprotein;orf1ab polyprotein	2332	2340	ILFTRFFYV	HLA-A02:01;HLA-A02:03;HLA-A02:04;HLA-A02:07;HLA-A03:01;HLA-A68:02;HLA-C12:02;HLA-C15:02	0.641789718	0.712049191	0.470284206	False
orf1a polyprotein;orf1ab polyprotein	1613	1621	HEGKTFYVL	HLA-A23:01;HLA-B18:01;HLA-B35:03;HLA-B37:01;HLA-B39:01;HLA-B40:01;HLA-B40:02;HLA-B44:02;HLA-B44:03;HLA-B45:01;HLA-B48:01;HLA-B49:01;HLA-C07:01	0.649321945	0.679506523	0.479844562	False
surface glycoprotein	36	43	VYYPDKVF	HLA-A23:01;HLA-A24:02;HLA-C04:01;HLA-C07:02;HLA-C14:02;HLA-C14:03	0.59328302	0.56840223	0.663072244	False
orf1a polyprotein;orf1ab polyprotein	3653	3661	VYMPASWVM	HLA-A23:01;HLA-A24:02;HLA-C04:01;HLA-C07:02;HLA-C14:02;HLA-C14:03	0.59328302	0.56840223	0.663072244	False
surface glycoprotein	379	387	CYGVSPTKL	HLA-A23:01;HLA-A24:02;HLA-C04:01;HLA-C07:02;HLA-C14:02;HLA-C14:03	0.59328302	0.56840223	0.663072244	False
orf1a polyprotein;orf1ab polyprotein	1255	1263	LYIDINGNL	HLA-A23:01;HLA-A24:02;HLA-C04:01;HLA-C07:02;HLA-C14:02;HLA-C14:03	0.59328302	0.56840223	0.663072244	False
orf1ab polyprotein	6860	6868	PYNMRVIHF	HLA-A23:01;HLA-A24:02;HLA-C04:01;HLA-C07:02;HLA-C14:02;HLA-C14:03	0.59328302	0.56840223	0.663072244	False
orf1a polyprotein;orf1ab polyprotein	3108	3116	IYLYLTFYL	HLA-A23:01;HLA-A24:02;HLA-C04:01;HLA-C07:02;HLA-C14:02;HLA-C14:03	0.59328302	0.56840223	0.663072244	False
orf1ab polyprotein	5178	5185	LYYQNNVF	HLA-A23:01;HLA-A24:02;HLA-C04:01;HLA-C07:02;HLA-C14:02;HLA-C14:03	0.59328302	0.56840223	0.663072244	False
orf1a polyprotein;orf1ab polyprotein	1634	1643	YYHTTDPSFL	HLA-A23:01;HLA-A24:02;HLA-C04:01;HLA-C07:02;HLA-C14:02;HLA-C14:03	0.59328302	0.56840223	0.663072244	False
orf1a polyprotein;orf1ab polyprotein	1529	1537	KRGDKSVYY	HLA-A29:02;HLA-A30:02;HLA-A36:01;HLA-B27:05;HLA-C06:02;HLA-C07:01;HLA-C07:02	0.650358109	0.700662045	0.448775986	False
nucleocapsid phosphoprotein	217	224	AALALLLL	HLA-B08:01;HLA-B51:01;HLA-C03:02;HLA-C03:03;HLA-C03:04;HLA-C08:01;HLA-C12:02;HLA-C12:03;HLA-C15:02;HLA-C17:01	0.561308225	0.583477391	0.68796209	False
orf1ab polyprotein	5622	5630	YYPSARIVY	HLA-A23:01;HLA-A24:02;HLA-A29:02;HLA-B15:03;HLA-C06:02;HLA-C07:02;HLA-C14:02;HLA-C14:03	0.589929719	0.586549428	0.649633406	False
orf1a polyprotein;orf1ab polyprotein	599	608	AYITGGVVQL	HLA-A02:04;HLA-A23:01;HLA-A24:02;HLA-A30:01;HLA-B15:09;HLA-B38:01;HLA-B40:01;HLA-B40:02;HLA-B48:01;HLA-B81:01;HLA-C07:02;HLA-C14:02;HLA-C14:03	0.560039512	0.545019394	0.70386748	False
orf1ab polyprotein	5305	5313	SRYWEPEFY	HLA-A29:02;HLA-A30:02;HLA-B27:05;HLA-C06:02;HLA-C07:01;HLA-C07:02	0.647589469	0.700624546	0.448775986	False
orf1a polyprotein;orf1ab polyprotein	1271	1278	VSDIDITF	HLA-A01:01;HLA-A36:01;HLA-B57:01;HLA-B57:03;HLA-B58:01;HLA-B58:02;HLA-C03:03;HLA-C04:01;HLA-C05:01;HLA-C08:02;HLA-C17:01	0.666349841	0.6895788	0.440272108	False
orf1ab polyprotein	4461	4469	YFVVKRHTF	HLA-A23:01;HLA-A24:02;HLA-A29:02;HLA-B18:01;HLA-B46:01;HLA-B53:01;HLA-C03:02;HLA-C03:03;HLA-C04:01;HLA-C14:02;HLA-C14:03	0.594207732	0.539208105	0.679435462	False
envelope protein	12	20	LIVNSVLLF	HLA-A23:01;HLA-A24:02;HLA-A29:02;HLA-A32:01;HLA-B15:01;HLA-B35:01;HLA-B53:01;HLA-B57:01;HLA-C02:02;HLA-C03:03;HLA-C12:02;HLA-C17:01	0.628504185	0.615917516	0.578610906	False
orf1a polyprotein;orf1ab polyprotein	3736	3744	LIISVTSNY	HLA-A01:01;HLA-A03:01;HLA-A25:01;HLA-A26:01;HLA-A29:02;HLA-A30:02;HLA-A36:01;HLA-B15:01;HLA-B46:01;HLA-C02:02;HLA-C03:02	0.650584573	0.71598933	0.438978361	False
surface glycoprotein	37	45	YYPDKVFRS	HLA-A23:01;HLA-A24:02;HLA-A29:02;HLA-C06:02;HLA-C07:02;HLA-C14:02;HLA-C14:03	0.580165451	0.585812503	0.649437118	False
surface glycoprotein	488	495	CYFPLQSY	HLA-A29:02;HLA-A30:02;HLA-B15:01;HLA-B18:01;HLA-B46:01;HLA-C03:02;HLA-C06:02;HLA-C07:02;HLA-C14:02;HLA-C14:03	0.57580578	0.600246862	0.642796033	False
ORF7b	6	14	LIDFYLCFL	HLA-A01:01;HLA-A02:07;HLA-C03:03;HLA-C04:01;HLA-C05:01;HLA-C08:01;HLA-C08:02;HLA-C17:01	0.637514174	0.660781565	0.507120723	False
orf1ab polyprotein	4625	4632	VVDSYYSL	HLA-A01:01;HLA-A02:07;HLA-C03:03;HLA-C04:01;HLA-C05:01;HLA-C08:01;HLA-C08:02;HLA-C17:01	0.637514174	0.660781565	0.507120723	False
orf1a polyprotein;orf1ab polyprotein	1398	1406	IVSTIQRKY	HLA-A03:01;HLA-A26:01;HLA-A29:02;HLA-A30:01;HLA-A30:02;HLA-A32:01;HLA-A36:01;HLA-B15:01;HLA-B53:01;HLA-B57:01;HLA-B58:01;HLA-B58:02;HLA-C02:02;HLA-C06:02	0.665585824	0.6738029	0.449676021	False
surface glycoprotein	975	983	SVLNDILSR	HLA-A02:04;HLA-A03:01;HLA-A11:01;HLA-A25:01;HLA-A26:01;HLA-A30:01;HLA-A31:01;HLA-A32:01;HLA-A33:03;HLA-A68:01;HLA-A74:01	0.57280653	0.568731976	0.668926348	False
orf1a polyprotein;orf1ab polyprotein	1984	1992	KLLHKPIVW	HLA-A02:01;HLA-A02:04;HLA-A03:01;HLA-A32:01;HLA-A74:01;HLA-B57:01;HLA-B57:03;HLA-B58:01	0.666482773	0.74379314	0.363985082	False
surface glycoprotein	402	410	IRGDEVRQI	HLA-B27:05;HLA-B38:01;HLA-B39:01;HLA-C06:02;HLA-C07:01;HLA-C07:02	0.629248609	0.694584227	0.466322076	False
orf1a polyprotein;orf1ab polyprotein	587	595	TSDLATNNL	HLA-A01:01;HLA-B38:01;HLA-C03:03;HLA-C04:01;HLA-C05:01;HLA-C08:01;HLA-C08:02;HLA-C17:01	0.647688105	0.675410279	0.463222996	False
nucleocapsid phosphoprotein	355	363	KHIDAYKTF	HLA-A23:01;HLA-A24:02;HLA-A25:01;HLA-A32:01;HLA-B15:01;HLA-B15:03;HLA-B15:09;HLA-B38:01;HLA-B39:01;HLA-B44:03;HLA-B46:01;HLA-B48:01;HLA-B57:01;HLA-B57:03;HLA-B58:01;HLA-B58:02;HLA-C02:02	0.593829662	0.567541603	0.646197231	False
surface glycoprotein	686	695	SVASQSIIAY	HLA-A03:01;HLA-A11:01;HLA-A25:01;HLA-A26:01;HLA-A29:02;HLA-A30:02;HLA-A32:01;HLA-A36:01;HLA-A68:01;HLA-B15:01;HLA-B15:03;HLA-B46:01	0.606258248	0.62920315	0.574269414	False
surface glycoprotein	886	894	WTFGAGAAL	HLA-A25:01;HLA-A26:01;HLA-A32:01;HLA-A68:02;HLA-B15:09;HLA-B57:03;HLA-C01:02;HLA-C02:02;HLA-C03:02;HLA-C03:03;HLA-C03:04;HLA-C08:01;HLA-C12:03	0.550414669	0.53752568	0.71369054	False
orf1a polyprotein;orf1ab polyprotein	4032	4040	MLFTMLRKL	HLA-A02:01;HLA-A02:03;HLA-A02:04;HLA-A02:07;HLA-A25:01;HLA-A32:01;HLA-B13:02;HLA-C06:02;HLA-C12:02;HLA-C17:01	0.619433658	0.678787063	0.497799912	False
orf1a polyprotein;orf1ab polyprotein	3605	3614	FLYENAFLPF	HLA-A02:01;HLA-A02:07;HLA-A03:01;HLA-A25:01;HLA-A29:02;HLA-C03:02	0.654165202	0.742232929	0.381145307	False
ORF3a protein	133	141	CRSKNPLLY	HLA-A29:02;HLA-A36:01;HLA-B27:05;HLA-C06:02;HLA-C07:01;HLA-C07:02	0.636154747	0.694878477	0.448157223	False
orf1ab polyprotein	5398	5405	SHKPPISF	HLA-B08:01;HLA-B15:01;HLA-B15:03;HLA-B15:09;HLA-B18:01;HLA-B39:01;HLA-B42:01;HLA-B46:01;HLA-C02:02;HLA-C07:02;HLA-C12:03	0.623802834	0.670510418	0.496044447	False
ORF6 protein	27	35	WNLDYIINL	HLA-A02:01;HLA-A02:04;HLA-A23:01;HLA-A30:01;HLA-B48:01;HLA-C07:01;HLA-C15:02;HLA-C17:01	0.670783743	0.7038743	0.381020835	False
orf1ab polyprotein	4717	4725	SFGPLVRKI	HLA-A23:01;HLA-A24:02;HLA-B13:02;HLA-B44:03;HLA-B49:01;HLA-B52:01;HLA-C04:01;HLA-C06:02	0.613958053	0.580966405	0.610256357	False
surface glycoprotein	1225	1233	IAIVMVTIM	HLA-B35:01;HLA-B35:03;HLA-B51:01;HLA-C02:02;HLA-C03:02;HLA-C03:03;HLA-C03:04;HLA-C08:01;HLA-C12:02;HLA-C12:03;HLA-C17:01	0.566131701	0.551418365	0.677567329	False
orf1a polyprotein;orf1ab polyprotein	3464	3472	TVNVLAWLY	HLA-A01:01;HLA-A03:01;HLA-A29:02;HLA-A30:02;HLA-A32:01;HLA-A36:01;HLA-B15:01;HLA-B35:01;HLA-B57:01;HLA-B58:02	0.667124641	0.737585621	0.329126084	False
orf1a polyprotein;orf1ab polyprotein	1636	1643	HTTDPSFL	HLA-A68:02;HLA-B58:02;HLA-C03:03;HLA-C03:04;HLA-C04:01;HLA-C05:01;HLA-C12:03;HLA-C15:02	0.633364539	0.647220561	0.510204398	False
orf1ab polyprotein	6349	6356	HAFHTPAF	HLA-B35:01;HLA-B35:03;HLA-B46:01;HLA-B51:01;HLA-B53:01;HLA-B54:01;HLA-B58:01;HLA-C02:02;HLA-C03:02;HLA-C03:03;HLA-C03:04;HLA-C12:03	0.56144033	0.540621653	0.687656091	False
orf1a polyprotein;orf1ab polyprotein	1642	1650	FLGRYMSAL	HLA-A02:01;HLA-A02:03;HLA-A02:04;HLA-C01:02;HLA-C03:04;HLA-C08:01;HLA-C17:01	0.579551914	0.614579642	0.624299057	False
orf1a polyprotein;orf1ab polyprotein	166	173	SSGVTREL	HLA-B46:01;HLA-B52:01;HLA-B58:02;HLA-C03:02;HLA-C03:03;HLA-C03:04;HLA-C07:01;HLA-C12:03;HLA-C15:02	0.577610271	0.613555851	0.608230229	False
orf1ab polyprotein	6668	6676	LAMDEFIER	HLA-A11:01;HLA-A31:01;HLA-A33:03;HLA-A68:01;HLA-A74:01;HLA-B35:01;HLA-C03:02;HLA-C03:03;HLA-C03:04;HLA-C12:02	0.513016731	0.484050789	0.756059167	False
orf1ab polyprotein	5081	5089	YANSVFNIC	HLA-B35:01;HLA-B35:03;HLA-B51:01;HLA-B53:01;HLA-C02:02;HLA-C03:02;HLA-C03:03;HLA-C03:04;HLA-C08:01;HLA-C12:02;HLA-C12:03	0.565132724	0.546853652	0.676804232	False
orf1a polyprotein;orf1ab polyprotein	828	836	DTVIEVQGY	HLA-A01:01;HLA-A25:01;HLA-A26:01;HLA-A68:01;HLA-B15:01;HLA-B18:01;HLA-B53:01;HLA-B57:01;HLA-C07:01	0.650920842	0.717252745	0.36290917	False
orf1a polyprotein;orf1ab polyprotein	1410	1418	KIQEGVVDY	HLA-A03:01;HLA-A29:02;HLA-A30:01;HLA-A30:02;HLA-A32:01;HLA-A36:01;HLA-B15:01;HLA-B15:03;HLA-B46:01;HLA-B58:01;HLA-C02:02;HLA-C07:01;HLA-C14:03	0.658756381	0.676795627	0.439035157	False
orf1a polyprotein;orf1ab polyprotein	2926	2934	SGKPVPYCY	HLA-A29:02;HLA-A30:01;HLA-A30:02;HLA-B15:01;HLA-B46:01;HLA-C07:01;HLA-C07:02;HLA-C12:02	0.608278843	0.646797573	0.536303118	False
orf1a polyprotein;orf1ab polyprotein	3886	3894	KLWAQCVQL	HLA-A02:01;HLA-A02:03;HLA-A02:04;HLA-A02:07;HLA-A03:01;HLA-A32:01;HLA-B15:03;HLA-B48:01;HLA-B81:01	0.643124238	0.720773174	0.400812879	False
orf1ab polyprotein	6886	6894	WLPTGTLLV	HLA-A02:01;HLA-A02:03;HLA-A02:04;HLA-A02:07;HLA-B13:02;HLA-C01:02;HLA-C06:02	0.581383909	0.638104755	0.57815755	False
ORF3a protein	40	48	SLPFGWLIV	HLA-A02:01;HLA-A02:03;HLA-A02:07;HLA-B13:02;HLA-C01:02;HLA-C06:02	0.580812339	0.638104755	0.57815755	False
ORF10 protein	11	18	FTIYSLLL	HLA-A01:01;HLA-B58:02;HLA-C02:02;HLA-C03:02;HLA-C03:03;HLA-C03:04;HLA-C08:01;HLA-C12:03;HLA-C15:02	0.572245364	0.607055912	0.62053374	False
orf1a polyprotein;orf1ab polyprotein	2334	2341	FTRFFYVL	HLA-C03:02;HLA-C03:03;HLA-C03:04;HLA-C07:02;HLA-C08:01;HLA-C12:03	0.529346621	0.560722672	0.689751	False
surface glycoprotein	362	369	VADYSVLY	HLA-A01:01;HLA-A36:01;HLA-B53:01;HLA-B58:01;HLA-C02:02;HLA-C04:01;HLA-C05:01;HLA-C08:02;HLA-C12:03	0.672450072	0.689424089	0.387868047	False
membrane glycoprotein	21	29	NLVIGFLFL	HLA-A02:01;HLA-A02:04;HLA-A02:07;HLA-A23:01;HLA-A68:02;HLA-C03:04;HLA-C08:01;HLA-C15:02;HLA-C17:01	0.6200442	0.63310357	0.544523073	False
orf1a polyprotein;orf1ab polyprotein	2141	2149	YAKPFLNKV	HLA-A02:03;HLA-A02:04;HLA-A02:07;HLA-A68:02;HLA-B46:01;HLA-B51:01;HLA-B52:01;HLA-B54:01;HLA-B55:01;HLA-C02:02;HLA-C03:02;HLA-C06:02;HLA-C08:01;HLA-C12:02;HLA-C12:03;HLA-C15:02	0.509400179	0.470202908	0.751888277	False
orf1a polyprotein;orf1ab polyprotein	1876	1884	TIKPVTYKL	HLA-A02:03;HLA-A02:04;HLA-A02:07;HLA-A23:01;HLA-A25:01;HLA-A30:01;HLA-A32:01;HLA-A68:02;HLA-B08:01;HLA-B15:01;HLA-B42:01;HLA-C02:02;HLA-C07:02;HLA-C17:01	0.635393927	0.648061549	0.488383931	False
orf1ab polyprotein	5092	5100	VTANVNALL	HLA-A01:01;HLA-A68:02;HLA-B57:01;HLA-B57:03;HLA-B58:01;HLA-C02:02;HLA-C03:03;HLA-C03:04;HLA-C12:03;HLA-C15:02	0.605209143	0.646220349	0.528390345	False
orf1a polyprotein;orf1ab polyprotein	924	932	FYPPDEDEE	HLA-A24:02;HLA-C04:01;HLA-C07:02;HLA-C14:02;HLA-C14:03	0.563584965	0.552031853	0.661201875	False
orf1a polyprotein;orf1ab polyprotein	3073	3080	EYSHVVAF	HLA-A24:02;HLA-C04:01;HLA-C07:02;HLA-C14:02;HLA-C14:03	0.563584965	0.552031853	0.661201875	False
surface glycoprotein	1109	1117	FYEPQIITT	HLA-A24:02;HLA-C04:01;HLA-C07:02;HLA-C14:02;HLA-C14:03	0.563584965	0.552031853	0.661201875	False
envelope protein	58	65	VYSRVKNL	HLA-A24:02;HLA-C04:01;HLA-C07:02;HLA-C14:02;HLA-C14:03	0.563584965	0.552031853	0.661201875	False
orf1a polyprotein;orf1ab polyprotein	837	845	KSVNITFEL	HLA-A23:01;HLA-A32:01;HLA-A68:02;HLA-B48:01;HLA-B57:01;HLA-B57:03;HLA-B58:01;HLA-B58:02;HLA-B81:01;HLA-C02:02;HLA-C03:03;HLA-C03:04;HLA-C08:01;HLA-C12:02;HLA-C12:03;HLA-C15:02	0.577119659	0.543538562	0.657152894	False
orf1a polyprotein;orf1ab polyprotein	670	678	EIKESVQTF	HLA-A23:01;HLA-A24:02;HLA-A25:01;HLA-A26:01;HLA-A32:01;HLA-B08:01;HLA-B15:01;HLA-B38:01;HLA-B42:01;HLA-B46:01;HLA-B53:01;HLA-C02:02	0.608900647	0.621262072	0.550568721	False
membrane glycoprotein	37	45	FAYANRNRF	HLA-A29:02;HLA-B35:01;HLA-B35:03;HLA-B51:01;HLA-B53:01;HLA-C02:02;HLA-C03:02;HLA-C03:03;HLA-C03:04;HLA-C12:02;HLA-C12:03;HLA-C17:01	0.600939688	0.583366372	0.595742039	False
ORF3a protein	45	53	WLIVGVALL	HLA-A02:01;HLA-A02:03;HLA-A02:04;HLA-A02:07;HLA-A32:01;HLA-A68:02;HLA-B15:09;HLA-B38:01;HLA-C04:01;HLA-C17:01	0.645073723	0.66715422	0.443023098	False
orf1a polyprotein;orf1ab polyprotein	2230	2238	IIWFLLLSV	HLA-A02:01;HLA-A02:03;HLA-A02:04;HLA-A02:07;HLA-A36:01;HLA-B13:02;HLA-B51:01;HLA-B54:01;HLA-C08:01;HLA-C12:02;HLA-C15:02	0.555052037	0.596769117	0.635348065	False
membrane glycoprotein	212	219	SSSDNIAL	HLA-B39:01;HLA-B81:01;HLA-C01:02;HLA-C03:02;HLA-C03:03;HLA-C03:04;HLA-C08:01;HLA-C08:02;HLA-C12:03;HLA-C15:02;HLA-C17:01	0.515980542	0.492012658	0.74339767	False
membrane glycoprotein	213	220	SSDNIALL	HLA-A01:01;HLA-A36:01;HLA-C03:03;HLA-C04:01;HLA-C05:01;HLA-C08:02;HLA-C15:02;HLA-C17:01	0.648975555	0.678487627	0.415325021	False
orf1a polyprotein;orf1ab polyprotein	2556	2564	SASVYYSQL	HLA-B46:01;HLA-C01:02;HLA-C02:02;HLA-C03:02;HLA-C03:03;HLA-C03:04;HLA-C08:01;HLA-C12:02;HLA-C12:03;HLA-C17:01	0.50022012	0.466632698	0.762897876	False
orf1ab polyprotein	6623	6631	AVKTQFNYY	HLA-A01:01;HLA-A03:01;HLA-A25:01;HLA-A26:01;HLA-A29:02;HLA-A30:01;HLA-A30:02;HLA-A36:01;HLA-B15:01;HLA-C02:02	0.666034509	0.72784472	0.314647231	False
ORF3a protein	83	91	LLLLFVTVY	HLA-A01:01;HLA-A03:01;HLA-A29:02;HLA-A30:02;HLA-A32:01;HLA-B15:01;HLA-B15:03;HLA-B35:01;HLA-C03:02	0.650875002	0.714359116	0.375403022	False
orf1ab polyprotein	5482	5489	LSDRELHL	HLA-A01:01;HLA-C03:03;HLA-C04:01;HLA-C05:01;HLA-C08:01;HLA-C08:02;HLA-C17:01	0.635025795	0.660781565	0.458326551	False
surface glycoprotein	77	86	KRFDNPVLPF	HLA-A03:01;HLA-A32:01;HLA-B27:05;HLA-C07:01;HLA-C07:02	0.631356868	0.702365286	0.396214817	False
orf1a polyprotein;orf1ab polyprotein	2351	2359	FSYFAVHFI	HLA-A68:02;HLA-B51:01;HLA-B58:02;HLA-C03:04;HLA-C06:02;HLA-C08:01;HLA-C08:02;HLA-C12:02;HLA-C12:03;HLA-C15:02;HLA-C17:01	0.577670165	0.557960177	0.635712536	False
orf1a polyprotein;orf1ab polyprotein	1290	1298	VVQEGVLTA	HLA-A02:01;HLA-A02:03;HLA-A11:01;HLA-A30:01;HLA-B41:01;HLA-B45:01;HLA-B54:01;HLA-B55:01	0.572333828	0.617969065	0.582721149	False
nucleocapsid phosphoprotein	345	352	NFKDQVIL	HLA-B08:01;HLA-C04:01;HLA-C07:02;HLA-C08:01;HLA-C14:02;HLA-C14:03	0.577111517	0.588974092	0.61351639	False
orf1a polyprotein;orf1ab polyprotein	2845	2853	YTNDKACPL	HLA-B46:01;HLA-C01:02;HLA-C02:02;HLA-C03:02;HLA-C03:03;HLA-C03:04;HLA-C12:03;HLA-C14:02;HLA-C14:03;HLA-C15:02	0.49599874	0.487129178	0.749304201	False
ORF3a protein	88	96	VTVYSHLLL	HLA-A01:01;HLA-A23:01;HLA-A68:02;HLA-B57:03;HLA-C03:03;HLA-C03:04;HLA-C08:01;HLA-C12:02;HLA-C12:03;HLA-C15:02	0.579570781	0.6016391	0.6042939	False
orf1ab polyprotein	5112	5120	VRNLQHRLY	HLA-A30:02;HLA-B27:05;HLA-C06:02;HLA-C07:01;HLA-C07:02	0.622867062	0.679780039	0.447217366	False
orf1ab polyprotein	5118	5126	RLYECLYRN	HLA-A02:01;HLA-A02:03;HLA-A02:04;HLA-A03:01;HLA-A32:01;HLA-A74:01;HLA-B13:02	0.65023084	0.734661074	0.336804878	False
orf1a polyprotein;orf1ab polyprotein	3801	3808	NRYFRLTL	HLA-B14:02;HLA-B15:09;HLA-B39:01;HLA-C06:02;HLA-C07:01;HLA-C07:02	0.619341225	0.679131416	0.453208581	False
surface glycoprotein	77	84	KRFDNPVL	HLA-B14:02;HLA-B15:09;HLA-B39:01;HLA-C06:02;HLA-C07:01;HLA-C07:02	0.619341225	0.679131416	0.453208581	False
orf1a polyprotein;orf1ab polyprotein	3100	3108	FLPGVYSVI	HLA-A02:01;HLA-A02:03;HLA-A02:07;HLA-A25:01;HLA-C01:02;HLA-C06:02	0.578646508	0.638777488	0.558477568	False
orf1ab polyprotein	6324	6331	CRFDTRVL	HLA-B14:02;HLA-B39:01;HLA-C06:02;HLA-C07:01;HLA-C07:02	0.619271525	0.679131416	0.453208581	False
surface glycoprotein	904	912	YRFNGIGVT	HLA-B14:02;HLA-B39:01;HLA-C06:02;HLA-C07:01;HLA-C07:02	0.619271525	0.679131416	0.453208581	False
surface glycoprotein	233	241	INITRFQTL	HLA-A23:01;HLA-A24:02;HLA-B08:01;HLA-B14:02;HLA-B15:09;HLA-B35:03;HLA-C03:03;HLA-C03:04;HLA-C15:02	0.577151509	0.606884723	0.592798292	False
ORF7b	13	21	FLAFLLFLV	HLA-A02:01;HLA-A02:03;HLA-A02:04;HLA-A02:07;HLA-A29:02;HLA-A68:02;HLA-B13:02;HLA-C06:02;HLA-C12:02	0.614514865	0.664571725	0.481462667	False
orf1ab polyprotein	6287	6295	KIEELFYSY	HLA-A01:01;HLA-A02:07;HLA-A03:01;HLA-A29:02;HLA-A30:01;HLA-A30:02;HLA-A32:01;HLA-A36:01;HLA-B15:01;HLA-B15:03;HLA-B58:01	0.642096737	0.692205803	0.413905735	False
orf1a polyprotein;orf1ab polyprotein	3669	3677	MVDTSLSGF	HLA-A01:01;HLA-A02:07;HLA-A25:01;HLA-A26:01;HLA-A36:01;HLA-B53:01;HLA-C02:02;HLA-C04:01;HLA-C05:01;HLA-C08:02	0.658652468	0.680786383	0.389753875	False
orf1a polyprotein;orf1ab polyprotein	3159	3167	NYLKRRVVF	HLA-A23:01;HLA-A24:02;HLA-B08:01;HLA-B14:02;HLA-B15:03;HLA-C07:02;HLA-C14:02;HLA-C14:03	0.580638618	0.598876137	0.597107565	False
orf1a polyprotein;orf1ab polyprotein	1415	1423	VVDYGARFY	HLA-A01:01;HLA-A29:02;HLA-A30:02;HLA-A36:01;HLA-B53:01;HLA-B57:01;HLA-B58:02;HLA-C02:02;HLA-C04:01;HLA-C05:01;HLA-C08:02	0.687110832	0.69977723	0.299652637	False
orf1a polyprotein;orf1ab polyprotein	889	897	LLTPLGIDL	HLA-A02:01;HLA-A02:04;HLA-A02:07;HLA-B81:01;HLA-C03:04;HLA-C06:02;HLA-C17:01	0.61797658	0.668271284	0.464624258	False
ORF6 protein	12	20	AEILLIIMR	HLA-A11:01;HLA-A31:01;HLA-A68:01;HLA-A74:01;HLA-B18:01;HLA-B40:01;HLA-B40:02;HLA-B41:01;HLA-B44:02;HLA-B44:03;HLA-B45:01;HLA-B49:01;HLA-B50:01	0.581491165	0.58680625	0.606656883	False
surface glycoprotein	1052	1060	FPQSAPHGV	HLA-A02:01;HLA-B07:02;HLA-B35:03;HLA-B42:01;HLA-B51:01;HLA-B54:01;HLA-B55:01	0.624773613	0.697131598	0.409640634	False
ORF7b	11	19	LCFLAFLLF	HLA-A24:02;HLA-A29:02;HLA-B35:01;HLA-B44:02;HLA-B44:03;HLA-B51:01;HLA-B57:01;HLA-C03:02	0.57356413	0.600104686	0.597560363	False
orf1ab polyprotein	6996	7004	NASSSEAFL	HLA-A68:02;HLA-B35:01;HLA-B35:03;HLA-C01:02;HLA-C02:02;HLA-C03:03;HLA-C03:04;HLA-C08:01;HLA-C12:03;HLA-C17:01	0.559549758	0.53570862	0.665499992	False
orf1ab polyprotein	5533	5541	VVYRGTTTY	HLA-A03:01;HLA-A25:01;HLA-A26:01;HLA-A29:02;HLA-A30:02;HLA-A32:01;HLA-A36:01;HLA-B15:01;HLA-B15:03;HLA-B46:01;HLA-B53:01;HLA-B57:01;HLA-B57:03;HLA-B58:01;HLA-C02:02;HLA-C03:02;HLA-C12:02	0.618578586	0.616357615	0.539723418	False
orf1ab polyprotein	6285	6293	AYKIEELFY	HLA-A29:02;HLA-A30:01;HLA-A30:02;HLA-B15:01;HLA-C07:01;HLA-C07:02;HLA-C14:02;HLA-C14:03	0.609851791	0.649193524	0.494468757	False
orf1a polyprotein;orf1ab polyprotein	2352	2359	SYFAVHFI	HLA-A24:02;HLA-B51:01;HLA-B52:01;HLA-C04:01;HLA-C06:02;HLA-C14:02;HLA-C14:03	0.562453517	0.535294559	0.659775507	False
orf1a polyprotein;orf1ab polyprotein	2968	2976	YLEGSVRVV	HLA-A02:01;HLA-A02:03;HLA-A02:04;HLA-A02:07;HLA-B13:02;HLA-C05:01;HLA-C06:02	0.612493473	0.687530385	0.435895509	False
membrane glycoprotein	56	64	LLWPVTLAC	HLA-A02:01;HLA-A02:04;HLA-A02:07;HLA-A03:01;HLA-A29:02;HLA-B46:01	0.635390603	0.72153271	0.386458646	False
orf1ab polyprotein	4732	4740	FVVSTGYHF	HLA-A24:02;HLA-A25:01;HLA-A26:01;HLA-A29:02;HLA-B35:01;HLA-B53:01;HLA-B57:01;HLA-B58:01;HLA-C02:02;HLA-C03:02;HLA-C03:03;HLA-C17:01	0.576242951	0.549648434	0.633283545	False
orf1a polyprotein;orf1ab polyprotein	3868	3876	TSVVLLSVL	HLA-B57:03;HLA-B58:02;HLA-C03:02;HLA-C03:03;HLA-C03:04;HLA-C06:02;HLA-C08:01;HLA-C12:02;HLA-C12:03;HLA-C15:02	0.519617937	0.521665807	0.70525959	False
nucleocapsid phosphoprotein	151	159	PANNAAIVL	HLA-B35:01;HLA-B35:03;HLA-B81:01;HLA-C02:02;HLA-C03:02;HLA-C03:03;HLA-C03:04;HLA-C08:01;HLA-C08:02;HLA-C12:02;HLA-C12:03;HLA-C17:01	0.57057051	0.553314534	0.634487039	False
surface glycoprotein	222	229	ALEPLVDL	HLA-A01:01;HLA-A02:04;HLA-A02:07;HLA-B08:01;HLA-C04:01;HLA-C05:01;HLA-C08:02;HLA-C17:01	0.651785161	0.698540649	0.349755769	False
surface glycoprotein	821	828	LLFNKVTL	HLA-A02:01;HLA-A02:04;HLA-B08:01;HLA-B14:02;HLA-B15:01;HLA-B48:01;HLA-B81:01;HLA-C03:02;HLA-C17:01	0.633674927	0.705850578	0.375425733	False
ORF7a protein	85	93	KLFIRQEEV	HLA-A02:01;HLA-A02:03;HLA-A02:04;HLA-A02:07;HLA-A32:01;HLA-B08:01;HLA-B13:02;HLA-C15:02	0.603440571	0.686422498	0.443903008	False
orf1a polyprotein;orf1ab polyprotein	2169	2177	MPYFFTLLL	HLA-B07:02;HLA-B14:02;HLA-B35:01;HLA-B35:03;HLA-B42:01;HLA-B51:01;HLA-B53:01;HLA-B54:01;HLA-B81:01;HLA-C06:02;HLA-C12:02;HLA-C15:02	0.606275174	0.612952061	0.538519271	False
orf1ab polyprotein	5582	5590	ISDEFSSNV	HLA-A01:01;HLA-A02:07;HLA-A36:01;HLA-C04:01;HLA-C05:01;HLA-C08:02;HLA-C12:03;HLA-C15:02	0.629602372	0.666813409	0.435453962	False
orf1ab polyprotein	5535	5543	YRGTTTYKL	HLA-B38:01;HLA-B39:01;HLA-C06:02;HLA-C07:01;HLA-C07:02	0.60970495	0.67298262	0.456974694	False
membrane glycoprotein	47	55	YIIKLIFLW	HLA-A02:04;HLA-A23:01;HLA-A24:02;HLA-A25:01;HLA-A26:01;HLA-A29:02;HLA-A32:01;HLA-A68:01;HLA-B13:02;HLA-B53:01;HLA-B57:01;HLA-B58:01;HLA-C02:02;HLA-C12:02;HLA-C17:01	0.598017901	0.556713171	0.599005717	False
orf1a polyprotein;orf1ab polyprotein	1851	1859	ALLTKSSEY	HLA-A01:01;HLA-A03:01;HLA-A25:01;HLA-A29:02;HLA-A30:02;HLA-A32:01;HLA-A36:01;HLA-B15:01;HLA-B15:03;HLA-B46:01;HLA-C14:02;HLA-C14:03	0.633357206	0.702173887	0.407606025	False
ORF9b protein	83	91	TTEELPDEF	HLA-A01:01;HLA-A29:02;HLA-A36:01;HLA-B35:01;HLA-B38:01;HLA-B53:01;HLA-B57:01;HLA-B57:03;HLA-C04:01;HLA-C05:01	0.657678245	0.684480167	0.353759033	False
orf1a polyprotein;orf1ab polyprotein	3202	3210	TQYNRYLAL	HLA-A02:03;HLA-A25:01;HLA-B08:01;HLA-B13:02;HLA-B14:02;HLA-B15:03;HLA-B15:09;HLA-B39:01;HLA-B46:01;HLA-B48:01;HLA-B52:01;HLA-C03:04;HLA-C08:01;HLA-C12:02;HLA-C14:02;HLA-C15:02	0.522187389	0.528834688	0.691031389	False
orf1a polyprotein;orf1ab polyprotein	2604	2612	VPMEKLKTL	HLA-A02:03;HLA-A02:04;HLA-A23:01;HLA-B07:02;HLA-B08:01;HLA-B14:02;HLA-B35:01;HLA-B35:03;HLA-B42:01;HLA-B51:01;HLA-B53:01;HLA-B55:01;HLA-B81:01	0.65610383	0.691217479	0.373216343	False
nucleocapsid phosphoprotein	159	167	LQLPQGTTL	HLA-A02:04;HLA-A23:01;HLA-A24:02;HLA-B14:02;HLA-B15:01;HLA-B15:03;HLA-B15:09;HLA-B38:01;HLA-B39:01;HLA-B48:01;HLA-C03:03;HLA-C03:04;HLA-C14:02;HLA-C14:03	0.560302951	0.559193562	0.631417914	False
orf1ab polyprotein	5386	5394	QLYLGGMSY	HLA-A01:01;HLA-A03:01;HLA-A26:01;HLA-A29:02;HLA-A30:02;HLA-A32:01;HLA-A36:01;HLA-B15:01;HLA-B15:03;HLA-B46:01	0.637027489	0.705568034	0.382731605	False
orf1a polyprotein;orf1ab polyprotein	2436	2444	VYANGGKGF	HLA-A23:01;HLA-A24:02;HLA-A29:02;HLA-B15:01;HLA-B46:01;HLA-C07:02;HLA-C14:02;HLA-C14:03	0.537276044	0.543400469	0.659813312	False
ORF3a protein	110	118	ALVYFLQSI	HLA-A02:01;HLA-A02:03;HLA-A02:04;HLA-A02:07;HLA-A25:01;HLA-A32:01;HLA-B13:02;HLA-B49:01;HLA-C06:02	0.607238579	0.676246223	0.445420727	False
orf1a polyprotein;orf1ab polyprotein	1143	1151	VLLAPLLSA	HLA-A02:01;HLA-A02:03;HLA-A02:04;HLA-A02:07;HLA-A03:01;HLA-B50:01;HLA-B54:01;HLA-B55:01	0.614586369	0.701582561	0.41104111	False
membrane glycoprotein	8	16	ITVEELKKL	HLA-A02:04;HLA-A02:07;HLA-A23:01;HLA-A25:01;HLA-A26:01;HLA-A68:02;HLA-B57:01;HLA-B57:03;HLA-B58:01;HLA-B58:02;HLA-C02:02;HLA-C03:03;HLA-C06:02;HLA-C12:02;HLA-C12:03;HLA-C15:02	0.583971547	0.572355744	0.591337656	False
surface glycoprotein	77	85	KRFDNPVLP	HLA-B27:05;HLA-C06:02;HLA-C07:01;HLA-C07:02	0.608121339	0.673799088	0.446597729	False
orf1a polyprotein;orf1ab polyprotein	2822	2830	STDTCFANK	HLA-A01:01;HLA-A03:01;HLA-A11:01;HLA-A30:01;HLA-A68:01	0.58358036	0.65206518	0.5030032	False
orf1a polyprotein;orf1ab polyprotein	3523	3531	AVLDMCASL	HLA-A02:01;HLA-A02:04;HLA-A02:07;HLA-A25:01;HLA-A32:01;HLA-B48:01;HLA-C03:04;HLA-C08:01;HLA-C14:03	0.581355947	0.640869589	0.532677074	False
orf1a polyprotein;orf1ab polyprotein	3107	3115	VIYLYLTFY	HLA-A01:01;HLA-A03:01;HLA-A29:02;HLA-A30:02;HLA-A36:01;HLA-B15:01;HLA-B15:03;HLA-B46:01;HLA-C02:02;HLA-C03:02;HLA-C12:02	0.623195296	0.674525328	0.444986727	False
orf1a polyprotein;orf1ab polyprotein	4207	4215	TELEPPCRF	HLA-A23:01;HLA-A24:02;HLA-B18:01;HLA-B37:01;HLA-B40:01;HLA-B40:02;HLA-B41:01;HLA-B44:02;HLA-B44:03;HLA-B49:01;HLA-B50:01	0.581063937	0.59614658	0.570949512	False
orf1a polyprotein;orf1ab polyprotein	273	280	FVFPLNSI	HLA-A02:03;HLA-A68:02;HLA-B14:02;HLA-B51:01;HLA-B52:01;HLA-B54:01;HLA-C03:02;HLA-C03:04;HLA-C06:02;HLA-C08:01;HLA-C08:02;HLA-C12:02	0.52959659	0.506380539	0.687723199	False
surface glycoprotein	815	823	RSFIEDLLF	HLA-A24:02;HLA-A32:01;HLA-A36:01;HLA-B15:01;HLA-B15:03;HLA-B57:01;HLA-B57:03;HLA-B58:01;HLA-B58:02;HLA-C07:01;HLA-C15:02	0.577196539	0.591893755	0.577324416	False
orf1a polyprotein;orf1ab polyprotein	1367	1375	ILGTVSWNL	HLA-A02:01;HLA-A02:04;HLA-A02:07;HLA-A24:02;HLA-C17:01	0.575107042	0.624250686	0.539878972	False
envelope protein	29	37	VTLAILTAL	HLA-A02:04;HLA-A03:01;HLA-A32:01;HLA-A68:02;HLA-B35:01;HLA-B57:03;HLA-B81:01;HLA-C03:02;HLA-C03:03;HLA-C03:04;HLA-C08:01;HLA-C15:02	0.569199012	0.578694848	0.609212346	False
orf1a polyprotein;orf1ab polyprotein	4122	4130	LAWPLIVTA	HLA-A02:07;HLA-B35:01;HLA-B35:03;HLA-B46:01;HLA-B51:01;HLA-B53:01;HLA-B54:01;HLA-B55:01;HLA-B57:01;HLA-C03:04;HLA-C08:01;HLA-C12:02;HLA-C12:03	0.512968534	0.499655675	0.69980769	False
orf1ab polyprotein	5022	5030	LRIMASLVL	HLA-B14:02;HLA-B15:09;HLA-B27:05;HLA-B38:01;HLA-B39:01;HLA-C03:04;HLA-C06:02;HLA-C07:02	0.57806709	0.626926585	0.528953142	False
orf1a polyprotein;orf1ab polyprotein	3820	3828	FRYMNSQGL	HLA-B14:02;HLA-B15:09;HLA-B27:05;HLA-B38:01;HLA-B39:01;HLA-C03:04;HLA-C06:02;HLA-C07:02	0.57806709	0.626926585	0.528953142	False
orf1ab polyprotein	4664	4672	KYDFTEERL	HLA-A23:01;HLA-A24:02;HLA-B38:01;HLA-B40:01;HLA-C04:01;HLA-C05:01;HLA-C08:02	0.601870526	0.601008433	0.541566418	False
orf1a polyprotein;orf1ab polyprotein	2043	2051	DLKPVSEEV	HLA-A02:01;HLA-A02:03;HLA-A02:07;HLA-A26:01;HLA-A68:02;HLA-B08:01;HLA-B46:01	0.591768217	0.660565888	0.467845396	False
orf1a polyprotein;orf1ab polyprotein	3183	3191	FLLNKEMYL	HLA-A02:01;HLA-A02:04;HLA-A02:07;HLA-B08:01;HLA-C03:04;HLA-C17:01	0.614581845	0.685172816	0.398537286	False
ORF3a protein	99	107	AGLEAPFLY	HLA-A03:01;HLA-A11:01;HLA-A29:02;HLA-A30:02;HLA-A32:01;HLA-B15:03;HLA-B44:02;HLA-B44:03;HLA-B57:01	0.602254673	0.643921997	0.474840755	False
surface glycoprotein	321	329	QPTESIVRF	HLA-A24:02;HLA-A26:01;HLA-B07:02;HLA-B18:01;HLA-B35:01;HLA-B35:03;HLA-B38:01;HLA-B42:01;HLA-B53:01;HLA-B54:01;HLA-B81:01	0.589970802	0.599544624	0.555474274	False
orf1ab polyprotein	5690	5698	TTADIVVFD	HLA-A11:01;HLA-A33:03;HLA-A68:01;HLA-A68:02;HLA-C06:02;HLA-C07:01;HLA-C12:02	0.550494	0.558606545	0.637172121	False
orf1a polyprotein;orf1ab polyprotein	1263	1270	LHPDSATL	HLA-B15:09;HLA-B39:01;HLA-C01:02;HLA-C04:01;HLA-C07:02;HLA-C14:02;HLA-C14:03	0.532984176	0.51413069	0.674574698	False
orf1a polyprotein;orf1ab polyprotein	1951	1959	ASRELKVTF	HLA-A30:01;HLA-A32:01;HLA-B15:01;HLA-B15:03;HLA-B46:01;HLA-B48:01;HLA-B57:01;HLA-B57:03;HLA-B58:01;HLA-B58:02;HLA-B81:01;HLA-C02:02;HLA-C07:01;HLA-C12:02;HLA-C12:03	0.600685435	0.607649548	0.527054891	False
ORF7a protein	79	87	ARSVSPKLF	HLA-A24:02;HLA-B27:05;HLA-B38:01;HLA-B39:01;HLA-C06:02;HLA-C07:02	0.544245624	0.581342864	0.605241331	False
orf1ab polyprotein	5534	5541	VYRGTTTY	HLA-A30:02;HLA-B15:01;HLA-B15:03;HLA-B46:01;HLA-C07:01;HLA-C07:02;HLA-C14:02;HLA-C14:03	0.576305517	0.614773993	0.536543412	False
orf1ab polyprotein	5271	5279	DVFHLYLQY	HLA-A03:01;HLA-A25:01;HLA-A26:01;HLA-A29:02;HLA-A30:01;HLA-A30:02;HLA-A32:01;HLA-A36:01;HLA-A68:01;HLA-B15:01;HLA-B18:01;HLA-B35:01;HLA-B53:01	0.655503047	0.668810531	0.358239261	False
orf1ab polyprotein	6681	6689	GYAFEHIVY	HLA-A29:02;HLA-A30:02;HLA-B15:01;HLA-B15:03;HLA-C07:01;HLA-C07:02;HLA-C14:02;HLA-C14:03	0.600548668	0.639850025	0.473230356	False
ORF9b protein	63	71	SLEDKAFQL	HLA-A02:01;HLA-A02:04;HLA-A02:07;HLA-B08:01;HLA-B42:01;HLA-C05:01;HLA-C08:02	0.633400344	0.713059042	0.299441113	False
surface glycoprotein	1095	1103	FVSNGTHWF	HLA-A25:01;HLA-A26:01;HLA-A29:02;HLA-A32:01;HLA-B15:01;HLA-B35:03;HLA-B38:01;HLA-B53:01;HLA-B57:03;HLA-C02:02;HLA-C03:02;HLA-C03:03;HLA-C03:04;HLA-C12:02;HLA-C17:01	0.589385853	0.590208542	0.547765312	False
orf1a polyprotein;orf1ab polyprotein	1338	1346	TVEEAKTVL	HLA-B08:01;HLA-B35:01;HLA-B35:03;HLA-B38:01;HLA-B42:01;HLA-B81:01;HLA-C04:01;HLA-C05:01;HLA-C08:01;HLA-C08:02	0.628097522	0.644250436	0.431815783	False
orf1a polyprotein;orf1ab polyprotein	2111	2119	NELSRVLGL	HLA-A23:01;HLA-B08:01;HLA-B14:02;HLA-B18:01;HLA-B37:01;HLA-B40:01;HLA-B40:02;HLA-B44:02;HLA-B44:03;HLA-B49:01	0.626822543	0.691829059	0.371493134	False
orf1a polyprotein;orf1ab polyprotein	3687	3695	SAVVLLILM	HLA-A68:01;HLA-B35:01;HLA-B35:03;HLA-B53:01;HLA-B57:01;HLA-C02:02;HLA-C03:02;HLA-C03:03;HLA-C06:02;HLA-C12:02;HLA-C12:03;HLA-C17:01	0.591184115	0.581978855	0.549015729	False
orf1ab polyprotein	5397	5405	KSHKPPISF	HLA-A32:01;HLA-B15:01;HLA-B15:03;HLA-B46:01;HLA-B57:01;HLA-B57:03;HLA-B58:01;HLA-B58:02;HLA-B81:01;HLA-C02:02;HLA-C03:03;HLA-C05:01;HLA-C12:02;HLA-C12:03;HLA-C15:02	0.570821055	0.593856884	0.559543026	False
orf1a polyprotein;orf1ab polyprotein	3699	3707	TVYDDGARR	HLA-A03:01;HLA-A11:01;HLA-A25:01;HLA-A26:01;HLA-A30:02;HLA-A31:01;HLA-A33:03;HLA-A68:01;HLA-A68:02;HLA-A74:01	0.555708725	0.532431236	0.630153578	False
orf1ab polyprotein	5408	5416	CANGQVFGL	HLA-B35:03;HLA-C02:02;HLA-C03:03;HLA-C03:04;HLA-C07:01;HLA-C12:02;HLA-C12:03	0.599341734	0.649827173	0.462615231	False
ORF3a protein	134	141	RSKNPLLY	HLA-A01:01;HLA-A30:01;HLA-A30:02;HLA-A36:01;HLA-B15:01;HLA-B46:01;HLA-B57:01;HLA-B57:03;HLA-B58:01;HLA-B58:02;HLA-C02:02;HLA-C12:02;HLA-C12:03;HLA-C15:02	0.576840164	0.596641685	0.551325134	False
orf1ab polyprotein	4906	4913	LYYDSMSY	HLA-A29:02;HLA-A30:02;HLA-B46:01;HLA-C03:02;HLA-C07:01;HLA-C07:02;HLA-C14:02;HLA-C14:03	0.559545771	0.587683626	0.573165516	False
nucleocapsid phosphoprotein	325	333	TPSGTWLTY	HLA-A29:02;HLA-A30:02;HLA-A36:01;HLA-B07:02;HLA-B15:01;HLA-B35:01;HLA-B35:03;HLA-B42:01;HLA-B53:01;HLA-B55:01;HLA-C07:01	0.651830451	0.687411709	0.310247026	False
ORF7a protein	24	31	VRGTTVLL	HLA-B39:01;HLA-C06:02;HLA-C07:01;HLA-C07:02	0.595544384	0.658097885	0.451954021	False
orf1ab polyprotein	7052	7060	LRGTAVMSL	HLA-B39:01;HLA-C06:02;HLA-C07:01;HLA-C07:02	0.595544384	0.658097885	0.451954021	False
orf1ab polyprotein	5890	5897	TRAKVGIL	HLA-B39:01;HLA-C06:02;HLA-C07:01;HLA-C07:02	0.595544384	0.658097885	0.451954021	False
orf1a polyprotein;orf1ab polyprotein	1962	1970	DLNGDVVAI	HLA-A02:01;HLA-A02:03;HLA-A02:04;HLA-A25:01;HLA-A26:01;HLA-B08:01;HLA-B13:02;HLA-B53:01	0.617616247	0.693399459	0.359159674	False
orf1ab polyprotein	5614	5621	HFAIGLAL	HLA-B08:01;HLA-B14:02;HLA-B15:09;HLA-B39:01;HLA-C03:02;HLA-C03:04;HLA-C04:01;HLA-C08:01;HLA-C14:02;HLA-C14:03	0.558041085	0.555268308	0.618034801	False
orf1a polyprotein;orf1ab polyprotein	3587	3595	ILTSLLVLV	HLA-A02:01;HLA-A02:03;HLA-A02:04;HLA-A02:07;HLA-A68:02;HLA-B13:02;HLA-C06:02;HLA-C15:02	0.586770745	0.638149025	0.485293264	False
ORF6 protein	23	31	KVSIWNLDY	HLA-A01:01;HLA-A03:01;HLA-A29:02;HLA-A30:02;HLA-A32:01;HLA-A36:01;HLA-B15:01;HLA-B57:01;HLA-B58:01	0.626717352	0.703680154	0.351243427	False
orf1a polyprotein;orf1ab polyprotein	2552	2560	SSAKSASVY	HLA-A01:01;HLA-A25:01;HLA-A26:01;HLA-A30:02;HLA-A36:01;HLA-B15:01;HLA-B15:03;HLA-B46:01;HLA-B57:01;HLA-B57:03;HLA-B58:01;HLA-C02:02;HLA-C12:02;HLA-C12:03	0.582303691	0.61629886	0.519439566	False
orf1a polyprotein;orf1ab polyprotein	817	825	GGAPTKVTF	HLA-A23:01;HLA-A24:02;HLA-B15:01;HLA-B15:03;HLA-B38:01;HLA-B48:01;HLA-B53:01;HLA-B57:01;HLA-B57:03;HLA-B58:01;HLA-C07:01	0.592233221	0.583763314	0.545017981	False
orf1a polyprotein;orf1ab polyprotein	569	576	ILDGISQY	HLA-A01:01;HLA-A30:02;HLA-A36:01;HLA-B15:01;HLA-B15:03;HLA-B46:01;HLA-C04:01;HLA-C05:01;HLA-C08:02	0.630521852	0.659075964	0.395454663	False
surface glycoprotein	870	877	IAQYTSAL	HLA-C01:02;HLA-C03:02;HLA-C03:03;HLA-C03:04;HLA-C08:01;HLA-C08:02;HLA-C12:03;HLA-C14:02;HLA-C14:03	0.470753266	0.462359102	0.74689039	False
surface glycoprotein	30	38	NSFTRGVYY	HLA-A01:01;HLA-A26:01;HLA-A29:02;HLA-A30:01;HLA-A30:02;HLA-A36:01;HLA-B15:03;HLA-B18:01;HLA-B53:01;HLA-B57:01;HLA-B58:01;HLA-C02:02;HLA-C12:02;HLA-C12:03	0.624490929	0.628544659	0.444516581	False
orf1a polyprotein;orf1ab polyprotein	1874	1882	TTTIKPVTY	HLA-A01:01;HLA-A25:01;HLA-A29:02;HLA-A30:02;HLA-A32:01;HLA-A36:01;HLA-B15:01;HLA-B53:01;HLA-B57:01;HLA-B57:03;HLA-B58:01;HLA-B58:02;HLA-C02:02;HLA-C12:02;HLA-C12:03	0.623395756	0.651931691	0.416030373	False
orf1ab polyprotein	4457	4465	LIDSYFVVK	HLA-A01:01;HLA-A02:07;HLA-A03:01;HLA-A11:01;HLA-C08:02	0.553033605	0.635240321	0.513224222	False
orf1a polyprotein;orf1ab polyprotein	979	987	WLDDDSQQT	HLA-A01:01;HLA-A02:01;HLA-A02:07	0.607064381	0.716816378	0.342538494	False
membrane glycoprotein	50	58	KLIFLWLLW	HLA-A03:01;HLA-A24:02;HLA-A29:02;HLA-A32:01;HLA-A36:01;HLA-A74:01;HLA-B13:02;HLA-B57:01;HLA-B58:01;HLA-C15:02	0.562930144	0.584987479	0.560888723	False
orf1ab polyprotein	5883	5891	NRFNVAITR	HLA-A31:01;HLA-A33:03;HLA-A68:01;HLA-A74:01;HLA-B14:02;HLA-B27:05;HLA-B38:01;HLA-B39:01;HLA-C06:02;HLA-C07:02	0.562108648	0.576266749	0.570862407	False
orf1a polyprotein;orf1ab polyprotein	3013	3021	SLPGVFCGV	HLA-A02:01;HLA-A02:03;HLA-A02:04;HLA-A02:07;HLA-A26:01;HLA-A68:02;HLA-B13:02;HLA-C01:02	0.556886357	0.603763327	0.552254615	False
orf1a polyprotein;orf1ab polyprotein	590	598	LATNNLVVM	HLA-B35:01;HLA-B35:03;HLA-B51:01;HLA-B54:01;HLA-C02:02;HLA-C03:02;HLA-C03:03;HLA-C03:04;HLA-C12:02;HLA-C12:03	0.534672002	0.543433718	0.622411637	False
surface glycoprotein	951	959	VVNQNAQAL	HLA-A32:01;HLA-B15:01;HLA-B35:03;HLA-B42:01;HLA-B81:01;HLA-C01:02;HLA-C02:02;HLA-C03:02;HLA-C03:03;HLA-C03:04;HLA-C08:02	0.540669339	0.547557963	0.615452562	False
orf1a polyprotein;orf1ab polyprotein	2618	2626	AELAKNVSL	HLA-B08:01;HLA-B14:02;HLA-B37:01;HLA-B39:01;HLA-B40:01;HLA-B40:02;HLA-B41:01;HLA-B44:02;HLA-B44:03;HLA-B45:01;HLA-B48:01;HLA-B49:01;HLA-B50:01;HLA-B81:01	0.605441799	0.658102522	0.421442003	False
orf1a polyprotein;orf1ab polyprotein	3719	3727	YKVYYGNAL	HLA-B15:03;HLA-B48:01;HLA-C03:03;HLA-C03:04;HLA-C07:02;HLA-C08:01;HLA-C14:02;HLA-C14:03	0.499611399	0.509232699	0.678461499	False
orf1a polyprotein;orf1ab polyprotein	30	38	GFGDSVEEV	HLA-A02:01;HLA-A02:03;HLA-B13:02;HLA-C04:01;HLA-C14:02;HLA-C14:03	0.595598833	0.633754476	0.46432221	False
surface glycoprotein	1221	1229	IAGLIAIVM	HLA-B35:01;HLA-B35:03;HLA-B51:01;HLA-C02:02;HLA-C03:02;HLA-C03:04;HLA-C08:01;HLA-C08:02;HLA-C12:02;HLA-C12:03	0.536688471	0.524460041	0.628703633	False
orf1a polyprotein;orf1ab polyprotein	3122	3130	FLAHIQWMV	HLA-A02:01;HLA-A02:03;HLA-A02:04;HLA-A02:07;HLA-A68:02;HLA-B13:02;HLA-C06:02;HLA-C12:02	0.577752495	0.630557996	0.479695878	False
orf1ab polyprotein	6301	6309	KFTDGVCLF	HLA-A23:01;HLA-A24:02;HLA-A29:02;HLA-A30:02;HLA-A32:01;HLA-B57:01;HLA-B57:03;HLA-B58:01;HLA-C04:01;HLA-C14:02;HLA-C14:03	0.573026104	0.51668068	0.599883742	False
orf1a polyprotein;orf1ab polyprotein	3555	3563	TPFDVVRQC	HLA-A68:01;HLA-B35:01;HLA-B35:03;HLA-B42:01;HLA-B51:01;HLA-B53:01;HLA-B54:01;HLA-B55:01;HLA-B81:01;HLA-C06:02;HLA-C07:01	0.606885887	0.613449983	0.466856018	False
orf1a polyprotein;orf1ab polyprotein	78	85	TAPHGHVM	HLA-B35:03;HLA-C01:02;HLA-C03:02;HLA-C05:01;HLA-C07:02;HLA-C12:03	0.509657424	0.553284828	0.623903021	False
surface glycoprotein	1264	1272	VLKGVKLHY	HLA-A01:01;HLA-A03:01;HLA-A29:02;HLA-A30:01;HLA-A30:02;HLA-A32:01;HLA-A36:01;HLA-B15:01;HLA-B46:01	0.621706875	0.688485988	0.355997648	False
surface glycoprotein	262	270	AAAYYVGYL	HLA-C02:02;HLA-C03:03;HLA-C03:04;HLA-C06:02;HLA-C08:01;HLA-C12:02;HLA-C12:03;HLA-C17:01	0.550871702	0.55378936	0.585740423	False
orf1ab polyprotein	5496	5504	PRPPLNRNY	HLA-C06:02;HLA-C07:01;HLA-C07:02	0.588035599	0.651486878	0.437079922	False
surface glycoprotein	1257	1265	DEDDSEPVL	HLA-B14:02;HLA-B15:09;HLA-B18:01;HLA-B35:03;HLA-B38:01;HLA-B39:01;HLA-B40:01;HLA-B40:02;HLA-B44:02;HLA-B44:03;HLA-C05:01;HLA-C08:02	0.600122654	0.660506135	0.399063532	False
orf1a polyprotein;orf1ab polyprotein	1420	1428	ARFYFYTSK	HLA-A03:01;HLA-A11:01;HLA-A30:01;HLA-B27:05;HLA-C07:02	0.537357387	0.58153333	0.569591327	False
orf1a polyprotein;orf1ab polyprotein	555	562	AQNSVRVL	HLA-B13:02;HLA-B15:01;HLA-B15:03;HLA-B39:01;HLA-B48:01;HLA-B52:01;HLA-B58:02;HLA-C06:02;HLA-C07:01;HLA-C12:02;HLA-C15:02	0.57309805	0.601149754	0.512526655	False
ORF3a protein	105	112	FLYLYALV	HLA-A02:01;HLA-A02:03;HLA-B51:01;HLA-C04:01	0.600990164	0.638574767	0.43325901	False
ORF3a protein	72	80	ALSKGVHFV	HLA-A02:01;HLA-A02:03;HLA-A02:04;HLA-A02:07;HLA-B13:02;HLA-C06:02;HLA-C15:02	0.565954323	0.629303099	0.484945833	False
ORF7a protein	57	65	TCFSTQFAF	HLA-A23:01;HLA-A24:02;HLA-A29:02;HLA-A32:01;HLA-B15:03;HLA-B38:01;HLA-B39:01;HLA-B44:02;HLA-C07:01	0.603823164	0.629468707	0.437576461	False
orf1ab polyprotein	4592	4599	GIVGVLTL	HLA-B13:02;HLA-B15:09;HLA-B52:01;HLA-C03:02;HLA-C03:03;HLA-C03:04;HLA-C07:01;HLA-C08:01;HLA-C17:01	0.543439008	0.559507487	0.579772331	False
orf1a polyprotein;orf1ab polyprotein	3753	3761	FLARGIVFM	HLA-A02:01;HLA-A02:03;HLA-A02:04;HLA-A26:01;HLA-C06:02;HLA-C12:02;HLA-C17:01	0.584167656	0.638861272	0.449737089	False
orf1ab polyprotein	4488	4496	VAKHDFFKF	HLA-A23:01;HLA-A24:02;HLA-A29:02;HLA-B35:01;HLA-B46:01;HLA-B53:01;HLA-B57:01;HLA-B57:03;HLA-C02:02;HLA-C03:02;HLA-C12:02;HLA-C12:03	0.551659624	0.506439306	0.618685828	False
ORF3a protein	6	15	RIFTIGTVTL	HLA-A02:03;HLA-A02:04;HLA-A02:07;HLA-A03:01;HLA-A30:01;HLA-A32:01;HLA-A68:02;HLA-A74:01;HLA-B13:02;HLA-B15:01;HLA-B40:01;HLA-B40:02;HLA-B42:01;HLA-B48:01;HLA-B57:03;HLA-B58:01;HLA-B81:01	0.557392868	0.54994781	0.57741962	False
orf1ab polyprotein	6437	6445	KQFDTYNLW	HLA-A23:01;HLA-A24:02;HLA-A30:01;HLA-A30:02;HLA-A31:01;HLA-A32:01;HLA-A74:01;HLA-B13:02;HLA-B15:01;HLA-B15:03;HLA-B48:01;HLA-B53:01;HLA-B57:01;HLA-B58:01	0.568223695	0.504909353	0.603642985	False
orf1a polyprotein;orf1ab polyprotein	116	124	VAYRKVLLR	HLA-A03:01;HLA-A11:01;HLA-A31:01;HLA-A33:03;HLA-A68:01;HLA-A74:01;HLA-B51:01;HLA-C12:02	0.504525333	0.496746641	0.663012769	False
orf1a polyprotein;orf1ab polyprotein	3092	3100	LCLTPVYSF	HLA-A23:01;HLA-A24:02;HLA-A29:02;HLA-A32:01;HLA-B35:01;HLA-B57:01;HLA-C07:01	0.588308429	0.606424967	0.480195254	False
ORF3a protein	140	148	LYDANYFLC	HLA-A01:01;HLA-A24:02;HLA-A29:02;HLA-C04:01	0.571848576	0.598167752	0.504914636	False
orf1ab polyprotein	6206	6214	AVHECFVKR	HLA-A03:01;HLA-A11:01;HLA-A26:01;HLA-A30:01;HLA-A31:01;HLA-A33:03;HLA-A68:01;HLA-A74:01	0.516405613	0.499740856	0.653149676	False
ORF3a protein	105	114	FLYLYALVYF	HLA-A02:01;HLA-A29:02;HLA-C03:02;HLA-C04:01;HLA-C17:01	0.619830995	0.645960315	0.393519694	False
orf1a polyprotein;orf1ab polyprotein	196	204	YPLECIKDL	HLA-B07:02;HLA-B08:01;HLA-B14:02;HLA-B35:01;HLA-B35:03;HLA-B42:01;HLA-B51:01;HLA-B53:01;HLA-B54:01;HLA-B81:01	0.617508527	0.6607054	0.37270432	False
orf1a polyprotein;orf1ab polyprotein	1273	1281	DIDITFLKK	HLA-A01:01;HLA-A03:01;HLA-A11:01;HLA-A36:01;HLA-A68:01	0.558807727	0.636137696	0.473519152	False
orf1a polyprotein;orf1ab polyprotein	623	631	KLKPVLDWL	HLA-A02:01;HLA-A02:03;HLA-A02:04;HLA-A02:07;HLA-A30:01;HLA-A30:02;HLA-A32:01;HLA-B15:01;HLA-B42:01;HLA-B57:03;HLA-C17:01	0.605086781	0.636988158	0.411557226	False
orf1ab polyprotein	5479	5487	REVLSDREL	HLA-B15:03;HLA-B18:01;HLA-B37:01;HLA-B40:01;HLA-B40:02;HLA-B41:01;HLA-B44:02;HLA-B44:03;HLA-B49:01;HLA-B58:02;HLA-C07:01	0.607955863	0.64377557	0.393358632	False
surface glycoprotein	487	495	NCYFPLQSY	HLA-A25:01;HLA-A26:01;HLA-A29:02;HLA-A30:02;HLA-B15:01;HLA-B15:03;HLA-B18:01;HLA-B35:01;HLA-B44:02;HLA-B44:03;HLA-B46:01;HLA-C03:02	0.583916449	0.608091034	0.477292216	False
orf1a polyprotein;orf1ab polyprotein	3165	3172	VVFNGVSF	HLA-A32:01;HLA-B08:01;HLA-B15:01;HLA-B15:03;HLA-B42:01;HLA-B46:01;HLA-B57:01;HLA-B57:03;HLA-B58:01;HLA-B58:02;HLA-B81:01;HLA-C02:02;HLA-C03:02;HLA-C03:03;HLA-C14:02;HLA-C14:03	0.548995414	0.561325839	0.564219015	False
orf1a polyprotein;orf1ab polyprotein	2384	2392	YIFFASFYY	HLA-A01:01;HLA-A03:01;HLA-A29:02;HLA-A30:02;HLA-A36:01;HLA-B15:01;HLA-C02:02;HLA-C03:02;HLA-C12:02	0.610294869	0.673903796	0.367015142	False
ORF8 protein	52	60	RKSAPLIEL	HLA-B07:02;HLA-B15:03;HLA-B42:01;HLA-B48:01;HLA-B81:01;HLA-C06:02;HLA-C07:02;HLA-C15:02	0.567533408	0.598021767	0.504110471	False
orf1a polyprotein;orf1ab polyprotein	3463	3471	ITVNVLAWL	HLA-A25:01;HLA-A68:02;HLA-B57:03;HLA-B58:01;HLA-C02:02;HLA-C03:02;HLA-C03:03;HLA-C03:04;HLA-C08:01;HLA-C12:02;HLA-C12:03;HLA-C15:02	0.502415002	0.476920308	0.676487675	False
orf1a polyprotein;orf1ab polyprotein	3152	3160	HFYWFFSNY	HLA-A25:01;HLA-A26:01;HLA-A29:02;HLA-A30:01;HLA-A30:02;HLA-B15:01;HLA-B15:03;HLA-B18:01;HLA-B46:01;HLA-B53:01;HLA-C03:02;HLA-C07:01;HLA-C14:02;HLA-C14:03	0.585070853	0.57878216	0.503533921	False
orf1ab polyprotein	6095	6102	LSDTLKNL	HLA-A01:01;HLA-C03:03;HLA-C04:01;HLA-C05:01;HLA-C08:02;HLA-C17:01	0.623773635	0.660723679	0.341018584	False
orf1a polyprotein;orf1ab polyprotein	1256	1263	YIDINGNL	HLA-A01:01;HLA-C03:03;HLA-C04:01;HLA-C05:01;HLA-C08:02;HLA-C17:01	0.623773635	0.660723679	0.341018584	False
orf1a polyprotein;orf1ab polyprotein	3633	3640	HAFLCLFL	HLA-B14:02;HLA-B51:01;HLA-C03:02;HLA-C03:03;HLA-C03:04;HLA-C08:01;HLA-C12:02;HLA-C12:03;HLA-C15:02;HLA-C17:01	0.4953162	0.483367137	0.677519741	False
orf1a polyprotein;orf1ab polyprotein	1937	1945	FADDLNQLT	HLA-A01:01;HLA-B35:01;HLA-B35:03;HLA-B53:01;HLA-C02:02;HLA-C05:01;HLA-C08:01;HLA-C08:02;HLA-C12:03	0.602813138	0.640403935	0.398426927	False
orf1a polyprotein;orf1ab polyprotein	2168	2175	YMPYFFTL	HLA-A02:07;HLA-B51:01;HLA-C01:02;HLA-C03:02;HLA-C07:02;HLA-C08:01;HLA-C14:02	0.423924969	0.405561911	0.768922652	False
orf1a polyprotein;orf1ab polyprotein	3865	3873	VKCTSVVLL	HLA-B48:01;HLA-C04:01;HLA-C06:02;HLA-C07:02	0.571443602	0.575863422	0.518242615	False
orf1a polyprotein;orf1ab polyprotein	3827	3835	GLLPPKNSI	HLA-A02:01;HLA-A02:04;HLA-A02:07;HLA-A32:01;HLA-B08:01;HLA-B13:02;HLA-B48:01	0.588822717	0.674808421	0.363568175	False
surface glycoprotein	418	425	IADYNYKL	HLA-B58:01;HLA-C03:03;HLA-C04:01;HLA-C05:01;HLA-C08:01;HLA-C08:02;HLA-C12:03;HLA-C17:01	0.587646791	0.575867382	0.503194533	False
orf1ab polyprotein	4632	4640	LLMPILTLT	HLA-A02:01;HLA-A02:03;HLA-A02:04;HLA-A02:07;HLA-A03:01	0.594452506	0.68585096	0.353471435	False
surface glycoprotein	821	829	LLFNKVTLA	HLA-A02:01;HLA-A02:03;HLA-A02:04;HLA-A02:07;HLA-A03:01	0.594452506	0.68585096	0.353471435	False
orf1ab polyprotein	6676	6684	RYKLEGYAF	HLA-A23:01;HLA-A24:02;HLA-A30:02;HLA-B15:01;HLA-B15:03;HLA-C07:02;HLA-C14:02;HLA-C14:03	0.529730188	0.51904157	0.611677287	False
surface glycoprotein	789	797	YKTPPIKDF	HLA-A24:02;HLA-B15:03;HLA-B46:01;HLA-C02:02;HLA-C03:03;HLA-C07:02	0.51284668	0.52166581	0.622877091	False
orf1a polyprotein;orf1ab polyprotein	1137	1145	NFNQHEVLL	HLA-A23:01;HLA-A24:02;HLA-B38:01;HLA-C04:01;HLA-C06:02;HLA-C14:02;HLA-C14:03	0.553816263	0.520224262	0.586422985	False
orf1a polyprotein;orf1ab polyprotein	2947	2955	SLRPDTRYV	HLA-A02:01;HLA-A02:03;HLA-A02:04;HLA-A02:07;HLA-A30:01;HLA-B46:01;HLA-C06:02	0.556991798	0.607720822	0.495298309	False
orf1a polyprotein;orf1ab polyprotein	677	685	TFFKLVNKF	HLA-A23:01;HLA-A24:02;HLA-A29:02;HLA-A32:01;HLA-B18:01;HLA-B38:01;HLA-B53:01;HLA-C04:01;HLA-C14:02;HLA-C14:03	0.580776987	0.534207522	0.544157702	False
ORF3a protein	103	111	APFLYLYAL	HLA-A02:04;HLA-B07:02;HLA-B08:01;HLA-B14:02;HLA-B35:01;HLA-B35:03;HLA-B37:01;HLA-B42:01;HLA-B48:01;HLA-B54:01;HLA-B55:01;HLA-B81:01;HLA-C08:01	0.582133644	0.640163174	0.437299155	False
ORF3a protein	106	114	LYLYALVYF	HLA-A23:01;HLA-A24:02;HLA-A29:02;HLA-B35:01;HLA-B57:01;HLA-C04:01;HLA-C14:02;HLA-C14:03	0.560083728	0.524280651	0.572652377	False
orf1ab polyprotein	5196	5204	DLTKGPHEF	HLA-A24:02;HLA-A25:01;HLA-A26:01;HLA-A32:01;HLA-B08:01;HLA-B15:01;HLA-B18:01;HLA-B53:01;HLA-C17:01	0.568538784	0.605741719	0.4882129	False
orf1a polyprotein;orf1ab polyprotein	3628	3636	FVKHKHAFL	HLA-A68:02;HLA-B08:01;HLA-C02:02;HLA-C03:02;HLA-C03:03;HLA-C03:04;HLA-C05:01;HLA-C12:02;HLA-C17:01	0.577546745	0.613072803	0.454474336	False
orf1a polyprotein;orf1ab polyprotein	783	791	VCINGLMLL	HLA-A02:04;HLA-A23:01;HLA-A24:02;HLA-B38:01;HLA-C03:02;HLA-C03:03;HLA-C03:04;HLA-C12:02;HLA-C15:02;HLA-C17:01	0.500046528	0.474003128	0.664248661	False
nucleocapsid phosphoprotein	48	56	NTASWFTAL	HLA-A25:01;HLA-A26:01;HLA-A32:01;HLA-A68:02;HLA-B14:02;HLA-B15:09;HLA-B39:01;HLA-C03:02;HLA-C03:03;HLA-C03:04;HLA-C08:01;HLA-C12:03;HLA-C15:02	0.510724283	0.517492071	0.628452752	False
orf1a polyprotein;orf1ab polyprotein	4094	4101	ALWEIQQV	HLA-A02:01;HLA-A02:03;HLA-A02:04;HLA-A02:07;HLA-B13:02;HLA-B52:01;HLA-C06:02	0.559197104	0.621192134	0.467990997	False
orf1a polyprotein;orf1ab polyprotein	4114	4122	ISMDNSPNL	HLA-B57:03;HLA-B58:01;HLA-C02:02;HLA-C03:03;HLA-C03:04;HLA-C05:01;HLA-C08:02;HLA-C12:03;HLA-C15:02	0.575048185	0.609130358	0.469664903	False
orf1ab polyprotein	6476	6484	VSIINNTVY	HLA-A01:01;HLA-A30:02;HLA-A36:01;HLA-B15:01;HLA-B15:03;HLA-B46:01;HLA-B57:01;HLA-B57:03;HLA-B58:01;HLA-B58:02;HLA-C02:02;HLA-C03:02;HLA-C12:02;HLA-C12:03	0.551672181	0.567666947	0.538721354	False
orf1ab polyprotein	7071	7079	SLLSKGRLI	HLA-A02:01;HLA-A02:04;HLA-A23:01;HLA-A32:01;HLA-B08:01;HLA-B13:02;HLA-B58:02	0.62105314	0.690559384	0.269128266	False
orf1a polyprotein;orf1ab polyprotein	1627	1635	LRVEAFEYY	HLA-A29:02;HLA-B27:05;HLA-B35:01;HLA-C07:01;HLA-C07:02	0.584904155	0.637975156	0.403087335	False
orf1a polyprotein;orf1ab polyprotein	2714	2721	NVKDFMSL	HLA-A25:01;HLA-B08:01;HLA-B14:02;HLA-B42:01;HLA-C03:02;HLA-C03:03;HLA-C07:02;HLA-C08:01	0.524216809	0.568408807	0.569916193	False
membrane glycoprotein	170	178	VATSRTLSY	HLA-A29:02;HLA-A30:02;HLA-A36:01;HLA-B15:03;HLA-B35:01;HLA-B46:01;HLA-B53:01;HLA-B57:01;HLA-B58:01;HLA-C02:02;HLA-C03:02;HLA-C03:04;HLA-C12:02;HLA-C12:03	0.551498812	0.503935461	0.591834234	False
orf1a polyprotein;orf1ab polyprotein	1960	1968	FPDLNGDVV	HLA-B07:02;HLA-B35:01;HLA-B35:03;HLA-B42:01;HLA-B51:01;HLA-B54:01;HLA-C04:01;HLA-C08:02	0.592024114	0.59674286	0.448564784	False
orf1a polyprotein;orf1ab polyprotein	486	494	AFVETVKGL	HLA-A23:01;HLA-A24:02;HLA-B44:02;HLA-B44:03;HLA-C04:01;HLA-C14:02;HLA-C14:03	0.556702489	0.536428029	0.558895869	False
orf1a polyprotein;orf1ab polyprotein	1214	1222	FITESKPSV	HLA-A02:01;HLA-A02:03;HLA-A02:04;HLA-A02:07;HLA-B54:01;HLA-C02:02;HLA-C03:04	0.561678168	0.615750004	0.463330443	False
membrane glycoprotein	118	126	ILLNVPLHG	HLA-A02:01;HLA-A02:04;HLA-A03:01;HLA-A29:02	0.628723398	0.72153271	0.229045758	False
orf1a polyprotein;orf1ab polyprotein	2534	2542	GSLPINVIV	HLA-A02:01;HLA-A68:02;HLA-B13:02;HLA-B57:01;HLA-C12:02;HLA-C12:03;HLA-C15:02	0.575890322	0.639439096	0.422472943	False
orf1a polyprotein;orf1ab polyprotein	2782	2789	FVAAIFYL	HLA-A02:04;HLA-A68:02;HLA-C02:02;HLA-C03:02;HLA-C03:03;HLA-C03:04;HLA-C06:02;HLA-C08:01;HLA-C12:02;HLA-C17:01	0.522183913	0.49674533	0.622515195	False
envelope protein	5	12	VSEETGTL	HLA-A01:01;HLA-B58:02;HLA-C03:03;HLA-C04:01;HLA-C05:01;HLA-C08:02	0.609245681	0.654299444	0.33884392	False
orf1ab polyprotein	4713	4721	FPPTSFGPL	HLA-B07:02;HLA-B51:01;HLA-B81:01;HLA-C01:02;HLA-C07:02;HLA-C14:03	0.511680512	0.553072363	0.586276692	False
orf1a polyprotein;orf1ab polyprotein	1899	1907	YYKKDNSYF	HLA-A23:01;HLA-A24:02;HLA-A29:02;HLA-C02:02;HLA-C07:02;HLA-C14:02;HLA-C14:03	0.532577775	0.521566631	0.587936573	False
membrane glycoprotein	47	54	YIIKLIFL	HLA-B08:01;HLA-C02:02;HLA-C03:02;HLA-C03:03;HLA-C03:04;HLA-C08:01;HLA-C12:02;HLA-C15:02;HLA-C17:01	0.513909799	0.522627774	0.615909661	False
nucleocapsid phosphoprotein	213	221	NGGDAALAL	HLA-B39:01;HLA-C01:02;HLA-C03:04;HLA-C07:02;HLA-C08:01	0.457204696	0.464948714	0.697644989	False
orf1ab polyprotein	5671	5679	KVNSTLEQY	HLA-A03:01;HLA-A25:01;HLA-A26:01;HLA-A29:02;HLA-A30:01;HLA-A30:02;HLA-A32:01;HLA-A36:01;HLA-B15:01;HLA-B15:03;HLA-B53:01;HLA-B57:01;HLA-B57:03;HLA-B58:01;HLA-C02:02	0.622702341	0.62180208	0.371091922	False
orf1ab polyprotein	6443	6451	NLWNTFTRL	HLA-A02:01;HLA-A02:03;HLA-A02:04;HLA-A02:07;HLA-A23:01;HLA-B13:02;HLA-C01:02;HLA-C17:01	0.555262002	0.584047443	0.510995679	False
ORF7b	6	13	LIDFYLCF	HLA-A01:01;HLA-C03:03;HLA-C04:01;HLA-C05:01;HLA-C08:02	0.604280815	0.654257957	0.33884392	False
ORF3a protein	139	147	LLYDANYFL	HLA-A02:01;HLA-A02:03;HLA-A02:04;HLA-A02:07;HLA-C03:04;HLA-C08:02;HLA-C17:01	0.573410723	0.622812625	0.428061669	False
ORF7a protein	81	89	SVSPKLFIR	HLA-A03:01;HLA-A11:01;HLA-A26:01;HLA-A31:01;HLA-A33:03;HLA-A68:01;HLA-A68:02;HLA-A74:01	0.510296951	0.492699938	0.628790067	False
orf1ab polyprotein	6849	6857	CQYLNTLTL	HLA-A32:01;HLA-B13:02;HLA-B14:02;HLA-B15:01;HLA-B15:03;HLA-B15:09;HLA-B38:01;HLA-B39:01;HLA-B48:01;HLA-B52:01;HLA-C03:02;HLA-C03:04;HLA-C08:01;HLA-C12:02;HLA-C15:02	0.491048423	0.48523321	0.65682111	False
orf1ab polyprotein	6772	6781	VTIDYTEISF	HLA-A23:01;HLA-A24:02;HLA-A25:01;HLA-A26:01;HLA-A29:02;HLA-A32:01;HLA-B15:01;HLA-B46:01;HLA-B57:01;HLA-B57:03;HLA-C02:02	0.541407205	0.544503651	0.551080874	False
orf1a polyprotein;orf1ab polyprotein	2070	2078	EVVGDIILK	HLA-A03:01;HLA-A11:01;HLA-A25:01;HLA-A26:01;HLA-A30:01;HLA-A33:03;HLA-A68:01;HLA-A68:02	0.51286006	0.505566014	0.61348911	False
surface glycoprotein	392	400	FTNVYADSF	HLA-A29:02;HLA-A32:01;HLA-B46:01;HLA-B57:01;HLA-B57:03;HLA-B58:01;HLA-C02:02;HLA-C03:02;HLA-C03:03;HLA-C04:01;HLA-C14:02;HLA-C14:03	0.535682961	0.500091134	0.598748722	False
orf1ab polyprotein	6773	6781	TIDYTEISF	HLA-A01:01;HLA-A02:07;HLA-B15:09;HLA-B35:03;HLA-B38:01;HLA-C04:01;HLA-C05:01;HLA-C08:02;HLA-C17:01	0.60357974	0.634972569	0.365747219	False
surface glycoprotein	345	353	TRFASVYAW	HLA-A32:01;HLA-B14:02;HLA-B27:05;HLA-B38:01;HLA-B39:01;HLA-C07:01;HLA-C07:02	0.578066227	0.640978294	0.387265537	False
orf1a polyprotein;orf1ab polyprotein	2052	2060	VENPTIQKD	HLA-B18:01;HLA-B40:01;HLA-B40:02;HLA-B41:01;HLA-B44:02;HLA-B44:03;HLA-B49:01;HLA-B53:01;HLA-C07:01	0.597836201	0.632566376	0.372005176	False
orf1a polyprotein;orf1ab polyprotein	906	915	YLFDESGEFK	HLA-A02:01;HLA-A03:01;HLA-A30:01	0.615738954	0.700703474	0.262393854	False
ORF3a protein	8	16	FTIGTVTLK	HLA-A03:01;HLA-A11:01;HLA-A26:01;HLA-A30:01;HLA-A33:03;HLA-A68:01;HLA-C02:02	0.510494905	0.504938272	0.615499594	False
orf1a polyprotein;orf1ab polyprotein	1846	1853	YCIDGALL	HLA-B15:09;HLA-C03:02;HLA-C03:03;HLA-C03:04;HLA-C04:01;HLA-C08:01;HLA-C14:02;HLA-C14:03;HLA-C17:01	0.507432625	0.455178866	0.656533676	False
ORF8 protein	109	117	LEYHDVRVV	HLA-B18:01;HLA-B40:01;HLA-B40:02;HLA-B41:01;HLA-B45:01;HLA-B49:01;HLA-B50:01;HLA-B51:01;HLA-B52:01;HLA-C06:02;HLA-C12:02;HLA-C12:03	0.531872138	0.535597578	0.563109618	False
orf1a polyprotein;orf1ab polyprotein	3052	3060	IVAIVVTCL	HLA-A68:02;HLA-B15:01;HLA-B15:09;HLA-B42:01;HLA-B57:03;HLA-B81:01;HLA-C03:03;HLA-C03:04;HLA-C06:02;HLA-C08:01;HLA-C08:02;HLA-C17:01	0.556368152	0.550274787	0.52369809	False
ORF3a protein	82	90	NLLLLFVTV	HLA-A02:01;HLA-A02:03;HLA-A02:04;HLA-A02:07;HLA-B08:01;HLA-B13:02;HLA-B54:01	0.55704801	0.643380458	0.407222881	False
ORF7a protein	65	73	FACPDGVKH	HLA-B35:01;HLA-B35:03;HLA-B46:01;HLA-B53:01;HLA-C02:02;HLA-C03:02;HLA-C03:04;HLA-C08:01;HLA-C08:02;HLA-C12:02;HLA-C12:03	0.513573119	0.477855425	0.627978091	False
ORF7a protein	66	75	ACPDGVKHVY	HLA-A26:01;HLA-A30:02;HLA-B15:01;HLA-B44:02;HLA-B44:03;HLA-C07:02;HLA-C14:02	0.541557236	0.590734114	0.497580951	False
ORF9b protein	74	81	IAVQMTKL	HLA-B51:01;HLA-C03:02;HLA-C03:03;HLA-C03:04;HLA-C05:01;HLA-C08:01;HLA-C12:03;HLA-C17:01	0.5144045	0.53442709	0.578535037	False
orf1a polyprotein;orf1ab polyprotein	3368	3375	RIQPGQTF	HLA-A24:02;HLA-A32:01;HLA-B15:01;HLA-B37:01;HLA-B42:01;HLA-B46:01;HLA-B57:03;HLA-B58:01;HLA-B58:02;HLA-C02:02;HLA-C03:02;HLA-C03:03;HLA-C14:03	0.485694813	0.465078181	0.656722412	False
surface glycoprotein	192	200	FVFKNIDGY	HLA-A01:01;HLA-A25:01;HLA-A26:01;HLA-A29:02;HLA-A30:02;HLA-A32:01;HLA-A36:01;HLA-B15:01;HLA-B35:01;HLA-B53:01;HLA-C02:02	0.611284686	0.647787705	0.325439455	False
orf1a polyprotein;orf1ab polyprotein	2328	2336	FLAYILFTR	HLA-A02:01;HLA-A02:03;HLA-A02:04;HLA-A31:01;HLA-A33:03;HLA-A68:01;HLA-A68:02;HLA-A74:01	0.568512081	0.583226464	0.47148554	False
orf1a polyprotein;orf1ab polyprotein	2641	2649	FVDSDVETK	HLA-A01:01;HLA-A02:07;HLA-A11:01;HLA-B53:01;HLA-C05:01;HLA-C08:01;HLA-C08:02	0.509653658	0.552260147	0.565927467	False
ORF3a protein	87	95	FVTVYSHLL	HLA-A68:02;HLA-B35:03;HLA-C02:02;HLA-C03:03;HLA-C03:04;HLA-C06:02;HLA-C08:02;HLA-C15:02;HLA-C17:01	0.573316132	0.57368237	0.475752026	False
orf1ab polyprotein	4848	4855	YRYNLPTM	HLA-B14:02;HLA-B15:09;HLA-B39:01;HLA-B51:01;HLA-B52:01;HLA-C03:02;HLA-C06:02;HLA-C07:02	0.512536905	0.533090853	0.578509979	False
ORF7b	13	22	FLAFLLFLVL	HLA-A02:01;HLA-A02:03;HLA-A68:02;HLA-C03:04;HLA-C08:01;HLA-C17:01	0.563659988	0.598433092	0.467711018	False
orf1ab polyprotein	5695	5703	VVFDEISMA	HLA-A02:01;HLA-A02:03;HLA-A26:01;HLA-A30:01;HLA-A68:02;HLA-B13:02;HLA-B55:01;HLA-C12:02	0.570015503	0.61776445	0.429647168	False
ORF3a protein	90	97	VYSHLLLV	HLA-A24:02;HLA-B52:01;HLA-C04:01;HLA-C06:02;HLA-C15:02	0.525263007	0.498508134	0.598621702	False
ORF7a protein	89	96	RQEEVQEL	HLA-B13:02;HLA-B14:02;HLA-B15:01;HLA-B15:03;HLA-B37:01;HLA-B39:01;HLA-B48:01;HLA-B52:01;HLA-B58:02;HLA-C05:01;HLA-C07:01;HLA-C08:02	0.60263091	0.649306203	0.341491074	False
orf1a polyprotein;orf1ab polyprotein	78	86	TAPHGHVMV	HLA-A68:02;HLA-B35:03;HLA-B51:01;HLA-C01:02;HLA-C05:01;HLA-C06:02;HLA-C12:02;HLA-C12:03	0.514852651	0.540445126	0.56755267	False
orf1ab polyprotein	5381	5388	VTDVTQLY	HLA-A01:01;HLA-A36:01;HLA-B57:01;HLA-B58:01;HLA-C04:01;HLA-C05:01;HLA-C08:02	0.593711204	0.632874506	0.370637898	False
orf1a polyprotein;orf1ab polyprotein	862	871	VELGTEVNEF	HLA-A23:01;HLA-A24:02;HLA-B18:01;HLA-B40:01;HLA-B40:02;HLA-B44:02;HLA-B44:03	0.531926525	0.550856843	0.544259614	False
orf1a polyprotein;orf1ab polyprotein	2600	2608	STFNVPMEK	HLA-A03:01;HLA-A11:01;HLA-A30:01;HLA-A33:03;HLA-A68:01;HLA-A68:02;HLA-A74:01;HLA-C12:02;HLA-C15:02	0.498633489	0.46590746	0.64275675	False
orf1a polyprotein;orf1ab polyprotein	404	413	IAFGGCVFSY	HLA-A29:02;HLA-A30:02;HLA-A32:01;HLA-A36:01;HLA-B15:01;HLA-B15:03;HLA-B35:01;HLA-B46:01;HLA-B53:01;HLA-B57:01;HLA-B58:01;HLA-C02:02;HLA-C03:02;HLA-C12:02;HLA-C12:03	0.551552764	0.518653871	0.553756065	False
orf1ab polyprotein	7003	7010	FLIGCNYL	HLA-A02:01;HLA-C03:02;HLA-C03:04;HLA-C08:01;HLA-C17:01	0.546949836	0.589933623	0.502788804	False
ORF3a protein	83	90	LLLLFVTV	HLA-A02:01;HLA-A02:04;HLA-B08:01;HLA-B51:01;HLA-B54:01	0.575169862	0.659176313	0.353635955	False
orf1a polyprotein;orf1ab polyprotein	3084	3092	LFLMSFTVL	HLA-A23:01;HLA-A24:02;HLA-C03:04;HLA-C04:01;HLA-C14:02;HLA-C14:03	0.527860105	0.484721894	0.601747711	False
orf1ab polyprotein	4755	4763	SSRLSFKEL	HLA-A30:01;HLA-B15:03;HLA-B42:01;HLA-C01:02;HLA-C02:02;HLA-C03:02;HLA-C03:03;HLA-C03:04;HLA-C08:02;HLA-C15:02	0.507512788	0.470880333	0.633257245	False
surface glycoprotein	995	1004	RLITGRLQSL	HLA-A02:01;HLA-A02:03;HLA-A02:04;HLA-A25:01;HLA-A32:01;HLA-B13:02;HLA-B15:01;HLA-B48:01;HLA-B57:03;HLA-B81:01	0.573755733	0.649433669	0.372576014	False
ORF7b	15	23	AFLLFLVLI	HLA-A23:01;HLA-A24:02;HLA-B44:02;HLA-B44:03;HLA-B52:01;HLA-C04:01	0.555725279	0.534698066	0.531533493	False
orf1ab polyprotein	5446	5454	LANTCTERL	HLA-B35:01;HLA-B35:03;HLA-B53:01;HLA-C02:02;HLA-C03:03;HLA-C03:04;HLA-C05:01;HLA-C12:03;HLA-C17:01	0.589067163	0.606327881	0.408251563	False
orf1ab polyprotein	6500	6507	TLPVNVAF	HLA-B08:01;HLA-B15:01;HLA-B46:01;HLA-C01:02;HLA-C04:01;HLA-C14:02;HLA-C14:03	0.507374801	0.52382026	0.587256504	False
membrane glycoprotein	46	53	LYIIKLIF	HLA-A23:01;HLA-A24:02;HLA-B08:01;HLA-C07:01;HLA-C14:02;HLA-C14:03	0.54910688	0.584858262	0.479887172	False
orf1ab polyprotein	5689	5697	ETTADIVVF	HLA-A24:02;HLA-A25:01;HLA-A26:01;HLA-A68:01;HLA-A68:02;HLA-B35:01;HLA-B53:01;HLA-B57:01;HLA-B57:03;HLA-B58:01;HLA-C12:03	0.530489755	0.498281543	0.579636614	False
orf1a polyprotein;orf1ab polyprotein	2765	2773	IVNNWLKQL	HLA-A02:03;HLA-A02:04;HLA-A02:07;HLA-A25:01;HLA-A32:01;HLA-B15:01;HLA-B42:01;HLA-B81:01;HLA-C02:02;HLA-C03:02;HLA-C03:03;HLA-C06:02;HLA-C12:02;HLA-C15:02	0.503104514	0.515109368	0.58899259	False
ORF7b	16	23	FLLFLVLI	HLA-A02:01;HLA-A02:04;HLA-B08:01;HLA-B51:01;HLA-C17:01	0.588158808	0.663707739	0.306930297	False
ORF3a protein	241	249	EEHVQIHTI	HLA-B13:02;HLA-B14:02;HLA-B18:01;HLA-B38:01;HLA-B40:01;HLA-B40:02;HLA-B44:02;HLA-B44:03;HLA-B45:01;HLA-B49:01;HLA-B50:01;HLA-B52:01	0.565581574	0.599070424	0.435157566	False
orf1a polyprotein;orf1ab polyprotein	1920	1928	YPNASFDNF	HLA-A24:02;HLA-B07:02;HLA-B35:01;HLA-B35:03;HLA-B42:01;HLA-B51:01;HLA-B53:01;HLA-B81:01	0.544820457	0.545012805	0.525627934	False
orf1a polyprotein;orf1ab polyprotein	3197	3204	VLLPLTQY	HLA-A01:01;HLA-A02:04;HLA-A03:01;HLA-A29:02;HLA-A30:02;HLA-A36:01;HLA-B15:01;HLA-B15:03;HLA-B46:01;HLA-C03:02	0.579604126	0.641857094	0.382782123	False
orf1a polyprotein;orf1ab polyprotein	2270	2278	YLNSTNVTI	HLA-A02:01;HLA-A02:03;HLA-A02:04;HLA-A02:07;HLA-A23:01;HLA-A32:01;HLA-B13:02;HLA-B38:01;HLA-B48:01;HLA-B53:01	0.578008137	0.613494733	0.399520645	False
orf1a polyprotein;orf1ab polyprotein	1144	1151	LLAPLLSA	HLA-A02:01;HLA-A02:03;HLA-B08:01;HLA-B46:01;HLA-B54:01;HLA-B55:01	0.549144766	0.635645863	0.40297315	False
orf1a polyprotein;orf1ab polyprotein	1426	1434	TSKTTVASL	HLA-A25:01;HLA-B08:01;HLA-B42:01;HLA-C01:02;HLA-C02:02;HLA-C07:01;HLA-C12:03	0.572215355	0.620579033	0.387710394	False
orf1a polyprotein;orf1ab polyprotein	1636	1645	HTTDPSFLGR	HLA-A03:01;HLA-A11:01;HLA-A26:01;HLA-A31:01;HLA-A33:03;HLA-A68:01;HLA-A74:01	0.484391057	0.48059151	0.628448798	False
surface glycoprotein	349	357	SVYAWNRKR	HLA-A03:01;HLA-A11:01;HLA-A26:01;HLA-A31:01;HLA-A33:03;HLA-A68:01;HLA-A74:01	0.484391057	0.48059151	0.628448798	False
ORF8 protein	6	13	FLGIITTV	HLA-A02:01;HLA-A02:03;HLA-A02:04;HLA-B08:01;HLA-B13:02;HLA-B52:01	0.566392442	0.651406241	0.348683727	False
orf1a polyprotein;orf1ab polyprotein	1444	1452	TLVTMPLGY	HLA-A01:01;HLA-A03:01;HLA-A25:01;HLA-A29:02;HLA-A30:02;HLA-A32:01;HLA-A36:01;HLA-B15:01	0.60844355	0.694541505	0.232444606	False
orf1a polyprotein;orf1ab polyprotein	2788	2795	YLITPVHV	HLA-A02:01;HLA-A02:03;HLA-A02:04;HLA-A02:07;HLA-C04:01	0.565941614	0.603345846	0.417745889	False
orf1a polyprotein;orf1ab polyprotein	2392	2400	YVWKSYVHV	HLA-A02:01;HLA-A02:07;HLA-A68:02;HLA-B13:02;HLA-C02:02;HLA-C05:01	0.590180931	0.65188922	0.309529001	False
orf1a polyprotein;orf1ab polyprotein	3397	3404	FTIKGSFL	HLA-B58:02;HLA-C02:02;HLA-C03:02;HLA-C03:03;HLA-C03:04;HLA-C05:01;HLA-C12:03;HLA-C15:02;HLA-C17:01	0.546711445	0.565810647	0.483096518	False
orf1ab polyprotein	5729	5736	LPAPRTLL	HLA-B07:02;HLA-B08:01;HLA-B14:02;HLA-B35:01;HLA-B35:03;HLA-B42:01;HLA-B51:01;HLA-B81:01	0.589764054	0.656920367	0.318236024	False
orf1ab polyprotein	6081	6089	GLPWNVVRI	HLA-A02:01;HLA-A02:03;HLA-A02:04;HLA-A02:07;HLA-B13:02;HLA-C06:02	0.545274798	0.61360953	0.425532669	False
orf1a polyprotein;orf1ab polyprotein	3780	3788	MLVYCFLGY	HLA-A01:01;HLA-A03:01;HLA-A25:01;HLA-A26:01;HLA-A29:02;HLA-A36:01;HLA-B15:01	0.586667661	0.683023045	0.274817199	False
orf1a polyprotein;orf1ab polyprotein	3196	3204	DVLLPLTQY	HLA-A03:01;HLA-A25:01;HLA-A26:01;HLA-A29:02;HLA-A30:02;HLA-A33:03;HLA-B15:01;HLA-B18:01;HLA-B35:01	0.566090737	0.597270806	0.417025499	False
orf1a polyprotein;orf1ab polyprotein	1669	1676	WADNNCYL	HLA-C03:03;HLA-C04:01;HLA-C05:01;HLA-C08:01;HLA-C08:02;HLA-C12:03;HLA-C17:01	0.575793773	0.571852251	0.44046608	False
orf1a polyprotein;orf1ab polyprotein	253	261	TPFEIKLAK	HLA-A03:01;HLA-A11:01;HLA-A30:01;HLA-A68:01;HLA-B35:01;HLA-B35:03;HLA-B53:01;HLA-B54:01;HLA-B55:01;HLA-B81:01	0.526922362	0.523052571	0.544143775	False
orf1a polyprotein;orf1ab polyprotein	2613	2620	VATAEAEL	HLA-B81:01;HLA-C03:02;HLA-C03:03;HLA-C03:04;HLA-C05:01;HLA-C08:01;HLA-C08:02;HLA-C12:03;HLA-C17:01	0.523911998	0.542942876	0.526402031	False
orf1a polyprotein;orf1ab polyprotein	2536	2543	LPINVIVF	HLA-B07:02;HLA-B08:01;HLA-B35:01;HLA-B35:03;HLA-B42:01;HLA-B51:01;HLA-B53:01;HLA-B54:01;HLA-B81:01	0.580145467	0.623691366	0.370913078	False
envelope protein	11	20	TLIVNSVLLF	HLA-A03:01;HLA-A23:01;HLA-A24:02;HLA-A29:02;HLA-A32:01;HLA-B15:01	0.555716276	0.586701144	0.440465559	False
orf1a polyprotein;orf1ab polyprotein	4073	4080	VIPDYNTY	HLA-B15:01;HLA-B46:01;HLA-C01:02;HLA-C03:02;HLA-C07:02;HLA-C14:02;HLA-C14:03	0.417874435	0.431649416	0.703371765	False
orf1a polyprotein;orf1ab polyprotein	2169	2176	MPYFFTLL	HLA-B07:02;HLA-B08:01;HLA-B14:02;HLA-B35:01;HLA-B42:01;HLA-B51:01;HLA-B54:01;HLA-C17:01	0.585556338	0.643174257	0.333136766	False
orf1ab polyprotein	5569	5576	HYVRITGL	HLA-A23:01;HLA-B14:02;HLA-C07:01;HLA-C07:02;HLA-C14:02;HLA-C14:03	0.55407456	0.590427996	0.435838249	False
orf1a polyprotein;orf1ab polyprotein	569	578	ILDGISQYSL	HLA-A02:01;HLA-A02:07;HLA-C05:01;HLA-C08:01;HLA-C08:02	0.557073773	0.625057449	0.388234132	False
orf1a polyprotein;orf1ab polyprotein	856	864	KCSAYTVEL	HLA-A32:01;HLA-B42:01;HLA-B48:01;HLA-B81:01;HLA-C07:01;HLA-C07:02;HLA-C15:02	0.544964213	0.5857855	0.452676617	False
surface glycoprotein	1262	1270	EPVLKGVKL	HLA-A26:01;HLA-A68:02;HLA-B07:02;HLA-B08:01;HLA-B14:02;HLA-B35:01;HLA-B35:03;HLA-B42:01;HLA-B53:01;HLA-B54:01;HLA-B81:01	0.598814511	0.635047948	0.325472752	False
orf1a polyprotein;orf1ab polyprotein	1181	1189	NLYDKLVSS	HLA-A02:01;HLA-A02:03;HLA-A02:04;HLA-A02:07;HLA-B08:01;HLA-B46:01	0.537241962	0.620803895	0.41372342	False
orf1a polyprotein;orf1ab polyprotein	3603	3611	FFFLYENAF	HLA-A24:02;HLA-A29:02;HLA-B35:01;HLA-C03:02;HLA-C04:01;HLA-C14:02;HLA-C14:03	0.506192271	0.464538836	0.608245805	False
ORF7b	8	16	DFYLCFLAF	HLA-A23:01;HLA-A24:02;HLA-A26:01;HLA-A29:02;HLA-B14:02;HLA-B18:01;HLA-B51:01;HLA-C03:02;HLA-C14:02;HLA-C14:03	0.503514402	0.478416789	0.600911063	False
orf1ab polyprotein	5139	5147	AYLRKHFSM	HLA-A23:01;HLA-A24:02;HLA-A29:02;HLA-B37:01;HLA-C07:02;HLA-C14:02;HLA-C14:03	0.494019072	0.490006514	0.595953135	False
orf1a polyprotein;orf1ab polyprotein	2467	2475	DEVARDLSL	HLA-B08:01;HLA-B14:02;HLA-B18:01;HLA-B40:01;HLA-B40:02;HLA-B44:02;HLA-B44:03	0.566806815	0.65010409	0.343219424	False
orf1ab polyprotein	5470	5478	KLSYGIATV	HLA-A02:01;HLA-A02:03;HLA-A02:04;HLA-A02:07;HLA-A32:01;HLA-A36:01;HLA-A68:02;HLA-A74:01;HLA-B13:02;HLA-C15:02	0.55639486	0.597446745	0.426720579	False
orf1ab polyprotein	5615	5622	FAIGLALY	HLA-A01:01;HLA-A29:02;HLA-A30:02;HLA-B35:01;HLA-B46:01;HLA-B53:01;HLA-C02:02;HLA-C03:02;HLA-C12:02;HLA-C12:03;HLA-C17:01	0.562906096	0.56157536	0.460681346	False
orf1a polyprotein;orf1ab polyprotein	1544	1553	FHLDGEVITF	HLA-A23:01;HLA-A24:02;HLA-A29:02;HLA-B15:03;HLA-B15:09;HLA-B35:01;HLA-B38:01;HLA-B39:01;HLA-B57:01;HLA-C03:03;HLA-C14:02;HLA-C14:03	0.517927196	0.505229157	0.559292579	False
orf1a polyprotein;orf1ab polyprotein	545	552	RSIFSRTL	HLA-B52:01;HLA-B57:03;HLA-B58:01;HLA-B58:02;HLA-C03:03;HLA-C03:04;HLA-C07:01;HLA-C15:02	0.528077228	0.553594768	0.504166724	False
orf1a polyprotein;orf1ab polyprotein	136	143	YGADLKSF	HLA-B08:01;HLA-B15:01;HLA-B15:03;HLA-B46:01;HLA-C03:02;HLA-C07:02;HLA-C12:02	0.4897601	0.541055394	0.553372059	False
orf1a polyprotein;orf1ab polyprotein	3093	3101	CLTPVYSFL	HLA-A02:01;HLA-A02:03;HLA-A02:04;HLA-A02:07;HLA-B48:01;HLA-C03:04;HLA-C17:01	0.540296213	0.588981633	0.446355702	False
orf1a polyprotein;orf1ab polyprotein	3549	3557	LLEDEFTPF	HLA-A01:01;HLA-A02:07;HLA-A24:02;HLA-A29:02;HLA-B15:01	0.49982884	0.56255831	0.514863684	False
orf1ab polyprotein	5528	5535	DYGDAVVY	HLA-B18:01;HLA-C07:01;HLA-C07:02;HLA-C14:02;HLA-C14:03	0.536086479	0.589508541	0.445097853	False
orf1ab polyprotein	6768	6776	KVVKVTIDY	HLA-A03:01;HLA-A26:01;HLA-A29:02;HLA-A30:01;HLA-A30:02;HLA-A32:01;HLA-A36:01;HLA-B15:01;HLA-B15:03;HLA-B57:01;HLA-B57:03;HLA-B58:01;HLA-C02:02	0.589972341	0.598416361	0.369098898	False
orf1a polyprotein;orf1ab polyprotein	90	97	AELEGIQY	HLA-B15:01;HLA-B15:03;HLA-B18:01;HLA-B37:01;HLA-B40:01;HLA-B40:02;HLA-B41:01;HLA-B44:02;HLA-B44:03;HLA-B45:01;HLA-B49:01;HLA-B50:01	0.558648883	0.593810471	0.41322868	False
ORF3a protein	205	212	SYFTSDYY	HLA-A29:02;HLA-A30:02;HLA-C07:01;HLA-C07:02;HLA-C14:02;HLA-C14:03	0.546117126	0.585885433	0.434232333	False
orf1a polyprotein;orf1ab polyprotein	282	290	KTIQPRVEK	HLA-A03:01;HLA-A11:01;HLA-A30:01;HLA-A31:01;HLA-A32:01;HLA-A68:01;HLA-A74:01;HLA-B57:03;HLA-B58:01	0.513373259	0.505478798	0.553409328	False
orf1a polyprotein;orf1ab polyprotein	2245	2253	YSTAALGVL	HLA-C02:02;HLA-C03:02;HLA-C03:03;HLA-C03:04;HLA-C08:01;HLA-C12:02;HLA-C12:03;HLA-C15:02;HLA-C17:01	0.473006238	0.451022735	0.636728602	False
orf1a polyprotein;orf1ab polyprotein	472	480	EIAIILASF	HLA-A25:01;HLA-A26:01;HLA-A68:01;HLA-A68:02;HLA-B08:01;HLA-B15:01;HLA-B44:02;HLA-B44:03;HLA-B46:01	0.551189519	0.623599245	0.378031783	False
orf1a polyprotein;orf1ab polyprotein	2779	2787	VFLFVAAIF	HLA-A23:01;HLA-A24:02;HLA-A29:02;HLA-B35:01;HLA-C04:01;HLA-C14:02;HLA-C14:03	0.532725968	0.483120515	0.553591341	False
orf1ab polyprotein	4716	4724	TSFGPLVRK	HLA-A03:01;HLA-A11:01;HLA-A30:01;HLA-A31:01;HLA-A33:03;HLA-A68:01;HLA-A68:02	0.490921489	0.469462576	0.604673438	False
orf1a polyprotein;orf1ab polyprotein	1875	1883	TTIKPVTYK	HLA-A03:01;HLA-A11:01;HLA-A30:01;HLA-A31:01;HLA-A33:03;HLA-A68:01;HLA-A68:02	0.490921489	0.469462576	0.604673438	False
orf1a polyprotein;orf1ab polyprotein	4124	4131	WPLIVTAL	HLA-B07:02;HLA-B08:01;HLA-B14:02;HLA-B35:01;HLA-B42:01;HLA-B51:01;HLA-B54:01;HLA-B81:01	0.574263299	0.63836615	0.332641714	False
orf1a polyprotein;orf1ab polyprotein	4057	4064	VPLNIIPL	HLA-B07:02;HLA-B08:01;HLA-B14:02;HLA-B35:01;HLA-B42:01;HLA-B51:01;HLA-B54:01;HLA-B81:01	0.574263299	0.63836615	0.332641714	False
surface glycoprotein	328	335	RFPNITNL	HLA-A23:01;HLA-A24:02;HLA-C01:02;HLA-C04:01;HLA-C14:02;HLA-C14:03	0.479502816	0.414361976	0.651762162	False
ORF10 protein	8	17	AFPFTIYSLL	HLA-A23:01;HLA-A24:02;HLA-C01:02;HLA-C04:01;HLA-C14:02;HLA-C14:03	0.479502816	0.414361976	0.651762162	False
orf1ab polyprotein	4712	4721	VFPPTSFGPL	HLA-A23:01;HLA-A24:02;HLA-C01:02;HLA-C04:01;HLA-C14:02;HLA-C14:03	0.479502816	0.414361976	0.651762162	False
membrane glycoprotein	57	65	LWPVTLACF	HLA-A23:01;HLA-A24:02;HLA-C01:02;HLA-C04:01;HLA-C14:02;HLA-C14:03	0.479502816	0.414361976	0.651762162	False
orf1a polyprotein;orf1ab polyprotein	2771	2778	KQLIKVTL	HLA-B08:01;HLA-B13:02;HLA-B14:02;HLA-B15:01;HLA-B15:03;HLA-B37:01;HLA-B48:01;HLA-B52:01;HLA-C07:01	0.570160416	0.633545788	0.329040708	False
orf1ab polyprotein	5754	5762	KTIGPDMFL	HLA-A30:01;HLA-A32:01;HLA-A68:02;HLA-B57:03;HLA-B58:01;HLA-B58:02;HLA-C02:02;HLA-C03:03;HLA-C03:04;HLA-C12:02;HLA-C12:03;HLA-C15:02	0.521464692	0.502028166	0.545674992	False
orf1ab polyprotein	5330	5338	VLCNSQTSL	HLA-A02:01;HLA-A02:03;HLA-A02:04;HLA-A02:07;HLA-C01:02;HLA-C08:02	0.515386421	0.569517255	0.487711254	False
orf1a polyprotein;orf1ab polyprotein	542	550	RVVRSIFSR	HLA-A03:01;HLA-A11:01;HLA-A31:01;HLA-A32:01;HLA-A33:03;HLA-A68:01;HLA-A74:01	0.483064424	0.483254678	0.59611433	False
orf1a polyprotein;orf1ab polyprotein	1552	1560	TFDNLKTLL	HLA-A23:01;HLA-A24:02;HLA-B38:01;HLA-C04:01;HLA-C05:01;HLA-C08:02	0.562988022	0.550661227	0.458180283	False
orf1a polyprotein;orf1ab polyprotein	2908	2915	FATSACVL	HLA-B58:02;HLA-C02:02;HLA-C03:02;HLA-C03:03;HLA-C03:04;HLA-C08:01;HLA-C08:02;HLA-C12:02;HLA-C12:03;HLA-C17:01	0.503686903	0.480524119	0.579538535	False
orf1a polyprotein;orf1ab polyprotein	907	914	LFDESGEF	HLA-A01:01;HLA-C04:01;HLA-C05:01;HLA-C08:02;HLA-C14:02;HLA-C14:03	0.571778781	0.61117191	0.356582595	False
orf1ab polyprotein	6247	6255	LADKFPVLH	HLA-A01:01;HLA-B35:03;HLA-B53:01;HLA-C04:01;HLA-C05:01;HLA-C08:02;HLA-C17:01	0.602648919	0.620760148	0.297666147	False
envelope protein	19	26	LFLAFVVF	HLA-A23:01;HLA-A24:02;HLA-B51:01;HLA-C03:02;HLA-C04:01;HLA-C14:02;HLA-C14:03	0.491390495	0.431111884	0.625298214	False
ORF9b protein	57	64	ARKTLNSL	HLA-B08:01;HLA-B14:02;HLA-B39:01;HLA-C06:02;HLA-C07:02	0.536759132	0.601227969	0.414957889	False
orf1a polyprotein;orf1ab polyprotein	3166	3175	VFNGVSFSTF	HLA-A23:01;HLA-A24:02;HLA-A29:02;HLA-B15:01;HLA-C04:01;HLA-C14:02;HLA-C14:03	0.524616141	0.493386119	0.546164631	False
orf1ab polyprotein	4780	4788	LLDKRTTCF	HLA-A01:01;HLA-A02:07;HLA-B53:01;HLA-C04:01;HLA-C05:01;HLA-C08:02;HLA-C17:01	0.593616959	0.608580858	0.329019832	False
orf1a polyprotein;orf1ab polyprotein	273	281	FVFPLNSII	HLA-A02:03;HLA-A32:01;HLA-A68:02;HLA-B35:03;HLA-B51:01;HLA-C03:04;HLA-C06:02;HLA-C08:01;HLA-C12:02;HLA-C17:01	0.487783	0.468310611	0.599996637	False
orf1a polyprotein;orf1ab polyprotein	1360	1368	ISNEKQEIL	HLA-B57:03;HLA-B58:01;HLA-B58:02;HLA-C03:03;HLA-C03:04;HLA-C05:01;HLA-C08:01;HLA-C12:03;HLA-C15:02	0.488055447	0.508946629	0.563813654	False
orf1ab polyprotein	5563	5571	TLVPQEHYV	HLA-A02:01;HLA-A02:03;HLA-A02:04;HLA-A02:07;HLA-A68:02;HLA-C06:02	0.547912087	0.602065352	0.398326366	False
orf1ab polyprotein	5475	5482	IATVREVL	HLA-B08:01;HLA-C03:02;HLA-C03:03;HLA-C03:04;HLA-C08:01;HLA-C08:02;HLA-C12:03	0.497841327	0.541487884	0.527776565	False
orf1a polyprotein;orf1ab polyprotein	2971	2979	GSVRVVTTF	HLA-A25:01;HLA-B15:01;HLA-B15:03;HLA-B53:01;HLA-B57:01;HLA-B57:03;HLA-B58:01;HLA-B58:02;HLA-C02:02;HLA-C03:03;HLA-C07:01;HLA-C17:01	0.587826812	0.592281774	0.357571102	False
orf1a polyprotein;orf1ab polyprotein	2366	2374	WLIINLVQM	HLA-A02:01;HLA-A02:03;HLA-A02:04;HLA-A02:07;HLA-A26:01;HLA-B15:01	0.526157345	0.603603713	0.416990762	False
ORF7a protein	2	9	KIILFLAL	HLA-B08:01;HLA-C03:02;HLA-C03:03;HLA-C03:04;HLA-C08:01;HLA-C08:02;HLA-C15:02;HLA-C17:01	0.494090647	0.513055178	0.559271219	False
orf1a polyprotein;orf1ab polyprotein	4083	4091	TCDGTTFTY	HLA-A01:01;HLA-A29:02;HLA-A30:02;HLA-A36:01;HLA-B15:01;HLA-B15:03;HLA-B38:01;HLA-B53:01;HLA-C07:01	0.601422769	0.64646	0.237008464	False
orf1a polyprotein;orf1ab polyprotein	634	642	KFKEGVEFL	HLA-A02:03;HLA-A23:01;HLA-A24:02;HLA-A30:01;HLA-A32:01;HLA-B48:01;HLA-B58:02;HLA-C04:01;HLA-C14:02;HLA-C14:03	0.508590396	0.435211056	0.602920873	False
ORF3a protein	204	212	HSYFTSDYY	HLA-A01:01;HLA-A29:02;HLA-A30:02;HLA-A36:01;HLA-B46:01;HLA-B58:01;HLA-C02:02;HLA-C07:01	0.571979618	0.611970515	0.361845546	False
orf1a polyprotein;orf1ab polyprotein	3107	3114	VIYLYLTF	HLA-B08:01;HLA-B15:01;HLA-B46:01;HLA-B51:01;HLA-B52:01;HLA-C02:02;HLA-C03:02;HLA-C03:03;HLA-C17:01	0.505266728	0.5405051	0.510305826	False
orf1a polyprotein;orf1ab polyprotein	1170	1178	RTNVYLAVF	HLA-A30:02;HLA-A32:01;HLA-A36:01;HLA-B15:01;HLA-B57:01;HLA-B57:03;HLA-B58:01;HLA-C02:02;HLA-C03:02;HLA-C07:01;HLA-C15:02	0.544038103	0.560774905	0.445756453	False
membrane glycoprotein	26	35	FLFLTWICLL	HLA-A02:01;HLA-A02:03;HLA-A02:04;HLA-A02:07;HLA-C06:02;HLA-C17:01	0.543632062	0.598311165	0.39973511	False
orf1a polyprotein;orf1ab polyprotein	3566	3574	VTFQSAVKR	HLA-A03:01;HLA-A11:01;HLA-A31:01;HLA-A33:03;HLA-A68:01;HLA-A74:01;HLA-B57:01	0.474142512	0.479534279	0.596633023	False
orf1a polyprotein;orf1ab polyprotein	4227	4234	YLYFIKGL	HLA-A02:01;HLA-A02:03;HLA-A02:04;HLA-B08:01;HLA-B46:01;HLA-C17:01	0.550220155	0.625845501	0.352107417	False
orf1ab polyprotein	5621	5628	LYYPSARI	HLA-A23:01;HLA-A24:02;HLA-B51:01;HLA-B52:01;HLA-C04:01;HLA-C14:02;HLA-C14:03	0.498444388	0.440648818	0.603696063	False
orf1ab polyprotein	5772	5781	IVDTVSALVY	HLA-A01:01;HLA-A03:01;HLA-A29:02;HLA-A30:02;HLA-A36:01;HLA-B57:01;HLA-B58:01;HLA-C08:02	0.583792143	0.650504999	0.284826137	False
orf1ab polyprotein	5213	5220	KQGDDYVY	HLA-A30:02;HLA-B15:01;HLA-B15:03;HLA-C07:01;HLA-C07:02	0.553164009	0.601319294	0.381554554	False
orf1a polyprotein;orf1ab polyprotein	3076	3083	HVVAFNTL	HLA-A25:01;HLA-A68:02;HLA-B08:01;HLA-B14:02;HLA-B18:01;HLA-B81:01;HLA-C03:02;HLA-C03:03;HLA-C03:04;HLA-C08:01	0.517831922	0.55337449	0.499467219	False
orf1ab polyprotein	5686	5694	ALPETTADI	HLA-A02:01;HLA-A02:03;HLA-A02:07;HLA-B13:02;HLA-C01:02	0.496283468	0.557347369	0.50671735	False
orf1ab polyprotein	5261	5269	LTKHPNQEY	HLA-A01:01;HLA-A29:02;HLA-A30:01;HLA-A30:02;HLA-A36:01;HLA-B15:01;HLA-B46:01;HLA-B57:01;HLA-B57:03;HLA-C02:02;HLA-C12:03	0.561130445	0.600783509	0.371247518	False
orf1a polyprotein;orf1ab polyprotein	1734	1741	YLFQHANL	HLA-A02:01;HLA-A02:03;HLA-A02:04;HLA-B08:01;HLA-C03:02;HLA-C17:01	0.553134779	0.62694456	0.344305389	False
orf1a polyprotein;orf1ab polyprotein	2590	2598	MFDAYVNTF	HLA-A23:01;HLA-A24:02;HLA-B35:03;HLA-B38:01;HLA-B53:01;HLA-C04:01;HLA-C08:02;HLA-C14:02;HLA-C14:03	0.532835101	0.472993651	0.54374203	False
orf1ab polyprotein	6902	6910	VSDADSTLI	HLA-A01:01;HLA-A36:01;HLA-B57:03;HLA-B58:01;HLA-B58:02;HLA-C04:01;HLA-C05:01;HLA-C08:02	0.580194931	0.603187684	0.342104748	False
orf1ab polyprotein	6294	6302	SYATHSDKF	HLA-A23:01;HLA-A24:02;HLA-A29:02;HLA-C07:02;HLA-C14:02;HLA-C14:03	0.482574529	0.475984617	0.583798548	False
orf1a polyprotein;orf1ab polyprotein	3837	3845	AFKLNIKLL	HLA-A24:02;HLA-A30:01;HLA-B42:01;HLA-C04:01;HLA-C06:02;HLA-C14:03	0.518842499	0.479940385	0.551475747	False
orf1a polyprotein;orf1ab polyprotein	2343	2351	LAAIMQLFF	HLA-A29:02;HLA-B35:01;HLA-B51:01;HLA-B53:01;HLA-B57:01;HLA-B57:03;HLA-C02:02;HLA-C03:02;HLA-C03:03;HLA-C12:02;HLA-C12:03;HLA-C17:01	0.538331404	0.514824796	0.494341422	False
orf1a polyprotein;orf1ab polyprotein	676	684	QTFFKLVNK	HLA-A03:01;HLA-A11:01;HLA-A30:01;HLA-A31:01;HLA-A33:03;HLA-A68:01;HLA-A74:01	0.47671187	0.457169967	0.60574159	False
orf1ab polyprotein	4801	4809	TVKPGNFNK	HLA-A03:01;HLA-A11:01;HLA-A30:01;HLA-A31:01;HLA-A33:03;HLA-A68:01;HLA-A74:01	0.47671187	0.457169967	0.60574159	False
ORF9b protein	40	47	KVYPIILR	HLA-A03:01;HLA-A11:01;HLA-A30:01;HLA-A31:01;HLA-A33:03;HLA-A68:01;HLA-A74:01	0.47671187	0.457169967	0.60574159	False
orf1a polyprotein;orf1ab polyprotein	112	120	GEIPVAYRK	HLA-A11:01;HLA-B18:01;HLA-B40:01;HLA-B40:02;HLA-B41:01;HLA-B44:02;HLA-B44:03;HLA-B49:01	0.489471357	0.524807876	0.540752428	False
ORF3a protein	106	113	LYLYALVY	HLA-A29:02;HLA-C07:01;HLA-C07:02;HLA-C14:02;HLA-C14:03	0.527752514	0.577884747	0.433597245	False
orf1ab polyprotein	5993	6001	GYPNMFITR	HLA-A11:01;HLA-A24:02;HLA-A31:01;HLA-A33:03;HLA-C14:02;HLA-C14:03	0.365902853	0.323978551	0.769381979	False
orf1ab polyprotein	4456	4464	NLIDSYFVV	HLA-A02:01;HLA-A02:03;HLA-A02:04;HLA-A02:07;HLA-A26:01;HLA-A68:02;HLA-B13:02;HLA-B39:01	0.530982432	0.58774239	0.419453837	False
orf1a polyprotein;orf1ab polyprotein	190	198	FCGPDGYPL	HLA-C03:03;HLA-C03:04;HLA-C07:02;HLA-C08:01	0.458771053	0.491402814	0.58937536	False
orf1ab polyprotein	5772	5780	IVDTVSALV	HLA-A01:01;HLA-A02:07;HLA-A36:01;HLA-A68:02;HLA-C04:01;HLA-C05:01;HLA-C08:02	0.578675231	0.607264226	0.326199756	False
orf1ab polyprotein	5039	5047	SLSHRFYRL	HLA-A02:01;HLA-A02:03;HLA-A02:04;HLA-A02:07;HLA-B08:01;HLA-C17:01	0.549641638	0.625845501	0.335338263	False
orf1a polyprotein;orf1ab polyprotein	2774	2782	IKVTLVFLF	HLA-A23:01;HLA-A24:02;HLA-A29:02;HLA-B15:03;HLA-B57:01;HLA-C07:02	0.504824155	0.502757515	0.536407342	False
surface glycoprotein	37	44	YYPDKVFR	HLA-A33:03;HLA-C04:01;HLA-C07:02;HLA-C14:02;HLA-C14:03	0.487878357	0.464183101	0.584274445	False
orf1ab polyprotein	5728	5735	QLPAPRTL	HLA-A02:07;HLA-B58:02;HLA-C01:02;HLA-C06:02;HLA-C07:02	0.453894685	0.470501701	0.607138517	False
orf1a polyprotein;orf1ab polyprotein	3968	3977	VANGDSEVVL	HLA-B35:01;HLA-B35:03;HLA-B48:01;HLA-B57:03;HLA-B81:01;HLA-C02:02;HLA-C03:03;HLA-C05:01;HLA-C08:01;HLA-C08:02;HLA-C12:03;HLA-C17:01	0.551184278	0.552144517	0.434209843	False
ORF6 protein	28	35	NLDYIINL	HLA-A01:01;HLA-A02:07;HLA-C04:01;HLA-C05:01;HLA-C08:02;HLA-C17:01	0.577066151	0.606032082	0.32787771	False
orf1ab polyprotein	5235	5242	FVDDIVKT	HLA-A01:01;HLA-A02:07;HLA-C04:01;HLA-C05:01;HLA-C08:02;HLA-C17:01	0.577066151	0.606032082	0.32787771	False
nucleocapsid phosphoprotein	223	230	LLDRLNQL	HLA-A01:01;HLA-A02:07;HLA-C04:01;HLA-C05:01;HLA-C08:02;HLA-C17:01	0.577066151	0.606032082	0.32787771	False
orf1a polyprotein;orf1ab polyprotein	3672	3680	TSLSGFKLK	HLA-A03:01;HLA-A11:01;HLA-A30:01;HLA-A31:01;HLA-A33:03;HLA-A68:01;HLA-B58:02	0.471233048	0.457146699	0.604321259	False
orf1a polyprotein;orf1ab polyprotein	1807	1814	MSAPPAQY	HLA-A01:01;HLA-A30:02;HLA-A36:01;HLA-B15:01;HLA-B46:01;HLA-B58:01;HLA-B58:02;HLA-C02:02;HLA-C03:02;HLA-C12:02;HLA-C12:03	0.504028251	0.52837184	0.515020217	False
orf1a polyprotein;orf1ab polyprotein	1312	1320	MLAKALRKV	HLA-A02:01;HLA-A02:03;HLA-A02:04;HLA-B13:02;HLA-C06:02	0.541672351	0.61360953	0.363363736	False
orf1ab polyprotein	5549	5557	FVLTSHTVM	HLA-B35:01;HLA-B35:03;HLA-C02:02;HLA-C03:02;HLA-C03:03;HLA-C03:04;HLA-C08:01;HLA-C14:02;HLA-C14:03;HLA-C17:01	0.470767629	0.441224209	0.617398931	False
orf1a polyprotein;orf1ab polyprotein	3700	3708	VYDDGARRV	HLA-A02:07;HLA-A23:01;HLA-B49:01;HLA-C04:01;HLA-C05:01;HLA-C06:02;HLA-C14:02;HLA-C14:03	0.552261011	0.540745332	0.442092237	False
ORF8 protein	33	41	VDDPCPIHF	HLA-A24:02;HLA-B37:01;HLA-C04:01;HLA-C05:01;HLA-C08:02;HLA-C17:01	0.54701272	0.533881628	0.467917109	False
ORF7a protein	24	32	VRGTTVLLK	HLA-A03:01;HLA-A11:01;HLA-B27:05;HLA-C07:01	0.520609511	0.58380844	0.426051189	False
surface glycoprotein	208	216	TPINLVRDL	HLA-B07:02;HLA-B35:01;HLA-B35:03;HLA-B38:01;HLA-B42:01;HLA-B51:01;HLA-B53:01;HLA-B81:01;HLA-C06:02	0.559665938	0.577224276	0.386536768	False
orf1ab polyprotein	4840	4848	AAISDYDYY	HLA-A25:01;HLA-A26:01;HLA-A29:02;HLA-A30:02;HLA-A36:01;HLA-B15:03;HLA-B35:01;HLA-B46:01;HLA-B53:01;HLA-B57:01;HLA-B58:01;HLA-C02:02;HLA-C08:01;HLA-C12:02;HLA-C12:03	0.514315814	0.457519098	0.563576014	False
surface glycoprotein	590	598	CSFGGVSVI	HLA-A25:01;HLA-A32:01;HLA-B52:01;HLA-B57:03;HLA-B58:02;HLA-C06:02;HLA-C07:01;HLA-C12:02;HLA-C12:03	0.547877987	0.588883928	0.387540289	False
orf1a polyprotein;orf1ab polyprotein	4364	4372	TLKNTVCTV	HLA-A02:01;HLA-A02:03;HLA-A02:04;HLA-B08:01;HLA-B13:02	0.55123768	0.643380458	0.295762188	False
surface glycoprotein	102	110	RGWIFGTTL	HLA-A23:01;HLA-A32:01;HLA-B15:01;HLA-B15:03;HLA-B40:02;HLA-B48:01;HLA-B52:01;HLA-B57:03;HLA-B58:02;HLA-B81:01;HLA-C01:02;HLA-C07:01	0.531219921	0.512473211	0.490265876	False
orf1a polyprotein;orf1ab polyprotein	1521	1530	TQLGIEFLKR	HLA-A03:01;HLA-A11:01;HLA-A31:01;HLA-A33:03;HLA-A68:01;HLA-A74:01;HLA-B27:05	0.470566106	0.473259151	0.586545663	False
orf1a polyprotein;orf1ab polyprotein	1415	1422	VVDYGARF	HLA-A01:01;HLA-B58:01;HLA-C04:01;HLA-C05:01;HLA-C08:02	0.56591791	0.602826963	0.342104748	False
orf1a polyprotein;orf1ab polyprotein	1873	1882	YTTTIKPVTY	HLA-A01:01;HLA-A25:01;HLA-A29:02;HLA-A30:02;HLA-A36:01;HLA-B46:01;HLA-B53:01;HLA-B57:01;HLA-B58:01;HLA-C02:02;HLA-C12:02;HLA-C12:03	0.541241064	0.562393319	0.434806793	False
orf1ab polyprotein	6850	6857	QYLNTLTL	HLA-A23:01;HLA-A24:02;HLA-B52:01;HLA-C07:02;HLA-C14:02;HLA-C14:03	0.458467452	0.446219894	0.612520344	False
surface glycoprotein	434	441	IAWNSNNL	HLA-B51:01;HLA-C03:03;HLA-C03:04;HLA-C05:01;HLA-C08:02;HLA-C12:03;HLA-C17:01	0.540347751	0.581661707	0.402130276	False
surface glycoprotein	710	718	NSIAIPTNF	HLA-A24:02;HLA-B53:01;HLA-B57:01;HLA-B57:03;HLA-B58:01;HLA-B58:02;HLA-C02:02;HLA-C03:03;HLA-C12:02;HLA-C12:03;HLA-C17:01	0.498422736	0.461159681	0.56886073	False
surface glycoprotein	122	130	NATNVVIKV	HLA-A68:01;HLA-A68:02;HLA-B13:02;HLA-B51:01;HLA-B53:01;HLA-B54:01;HLA-C02:02;HLA-C06:02;HLA-C12:02;HLA-C12:03;HLA-C15:02	0.520327245	0.497712215	0.51183736	False
orf1a polyprotein;orf1ab polyprotein	2497	2505	KNGSIHLYF	HLA-A23:01;HLA-A24:02;HLA-A29:02;HLA-B58:01;HLA-C07:01;HLA-C15:02	0.51318215	0.509594365	0.511377513	False
orf1a polyprotein;orf1ab polyprotein	3148	3156	ISTKHFYWF	HLA-A23:01;HLA-A24:02;HLA-B57:01;HLA-B57:03;HLA-B58:01;HLA-B58:02;HLA-C02:02;HLA-C03:02;HLA-C03:03;HLA-C15:02;HLA-C17:01	0.483467192	0.428898056	0.603153787	False
orf1ab polyprotein	6708	6717	KRFKESPFEL	HLA-A32:01;HLA-B27:05;HLA-B39:01;HLA-C07:01;HLA-C07:02	0.533810197	0.597914551	0.380112859	False
ORF3a protein	58	66	SASKIITLK	HLA-A03:01;HLA-A11:01;HLA-A30:01;HLA-A33:03;HLA-A68:01;HLA-B53:01;HLA-C02:02	0.492931938	0.467661538	0.566605533	False
orf1a polyprotein;orf1ab polyprotein	1558	1565	TLLSLREV	HLA-A02:01;HLA-A02:03;HLA-A02:04;HLA-B08:01;HLA-B52:01	0.544800372	0.629081248	0.31555181	False
ORF3a protein	263	271	IYDEPTTTT	HLA-A23:01;HLA-A24:02;HLA-C04:01;HLA-C05:01;HLA-C08:02	0.547281539	0.530410283	0.453237838	False
orf1a polyprotein;orf1ab polyprotein	3097	3105	VYSFLPGVY	HLA-A24:02;HLA-A29:02;HLA-A30:02;HLA-C07:02;HLA-C14:02;HLA-C14:03	0.467179194	0.466683273	0.582058192	False
nucleocapsid phosphoprotein	216	223	DAALALLL	HLA-B08:01;HLA-B14:02;HLA-B35:01;HLA-B51:01;HLA-C03:04;HLA-C08:01;HLA-C17:01	0.519397492	0.543903083	0.463571534	False
orf1a polyprotein;orf1ab polyprotein	3356	3364	TANPKTPKY	HLA-A26:01;HLA-A29:02;HLA-A30:02;HLA-A36:01;HLA-B35:01;HLA-B35:03;HLA-B46:01;HLA-B53:01;HLA-B57:01;HLA-B58:01;HLA-C02:02;HLA-C03:02;HLA-C12:02;HLA-C12:03	0.498557028	0.454462792	0.564955777	False
ORF10 protein	7	17	FAFPFTIYSLL	HLA-B35:01;HLA-C02:02;HLA-C03:03;HLA-C03:04;HLA-C08:01;HLA-C12:02;HLA-C12:03;HLA-C17:01	0.494961011	0.485159209	0.539607151	False
ORF3a protein	97	106	VAAGLEAPFL	HLA-B35:01;HLA-C02:02;HLA-C03:03;HLA-C03:04;HLA-C08:01;HLA-C12:02;HLA-C12:03;HLA-C17:01	0.494961011	0.485159209	0.539607151	False
ORF3a protein	206	214	YFTSDYYQL	HLA-A23:01;HLA-A24:02;HLA-B35:03;HLA-B48:01;HLA-C04:01;HLA-C08:01;HLA-C14:02;HLA-C14:03	0.467142506	0.39373109	0.632885735	False
orf1a polyprotein;orf1ab polyprotein	1305	1313	KAGGTTEML	HLA-B58:01;HLA-C02:02;HLA-C05:01;HLA-C07:01;HLA-C08:01;HLA-C12:03;HLA-C17:01	0.556176658	0.582594672	0.373488772	False
orf1a polyprotein;orf1ab polyprotein	232	241	REHEHEIAWY	HLA-A30:02;HLA-B15:01;HLA-B15:03;HLA-B18:01;HLA-B40:01;HLA-B41:01;HLA-B44:02;HLA-B44:03;HLA-B45:01;HLA-B46:01;HLA-B50:01	0.521825461	0.553894422	0.436195328	False
orf1ab polyprotein	5399	5407	HKPPISFPL	HLA-B48:01;HLA-C01:02;HLA-C06:02;HLA-C07:02	0.449771208	0.470978171	0.587684376	False
ORF3a protein	98	106	AAGLEAPFL	HLA-B35:01;HLA-C03:03;HLA-C03:04;HLA-C05:01;HLA-C12:02;HLA-C12:03;HLA-C17:01	0.518205624	0.555644892	0.436549052	False
orf1a polyprotein;orf1ab polyprotein	96	104	QYGRSGETL	HLA-A23:01;HLA-A24:02;HLA-B38:01;HLA-C07:02;HLA-C14:02;HLA-C14:03	0.461106881	0.459779074	0.586130623	False
orf1ab polyprotein	4766	4774	YAADPAMHA	HLA-B46:01;HLA-B54:01;HLA-C02:02;HLA-C03:02;HLA-C03:03;HLA-C03:04;HLA-C08:01;HLA-C12:02;HLA-C12:03	0.422268201	0.412922236	0.649094267	False
ORF3a protein	223	231	TGVEHVTFF	HLA-A23:01;HLA-A24:02;HLA-B18:01;HLA-B37:01;HLA-B53:01;HLA-C07:01;HLA-C12:02	0.523984807	0.520919882	0.471844001	False
orf1a polyprotein;orf1ab polyprotein	3164	3172	RVVFNGVSF	HLA-A23:01;HLA-A26:01;HLA-A29:02;HLA-A32:01;HLA-B15:01;HLA-B15:03;HLA-B42:01;HLA-B46:01;HLA-B48:01;HLA-B53:01;HLA-B57:01;HLA-B57:03;HLA-B58:01;HLA-B58:02;HLA-B81:01;HLA-C02:02;HLA-C03:03	0.540584226	0.488371466	0.485103257	False
surface glycoprotein	820	828	DLLFNKVTL	HLA-A02:01;HLA-A02:04;HLA-B08:01;HLA-B14:02;HLA-B48:01	0.562326021	0.647588667	0.241192581	False
orf1a polyprotein;orf1ab polyprotein	2889	2897	FSAVGNICY	HLA-A01:01;HLA-A36:01;HLA-B15:01;HLA-B46:01;HLA-B57:01;HLA-C02:02;HLA-C03:02;HLA-C12:02;HLA-C12:03	0.490081716	0.551931054	0.4709942	False
orf1a polyprotein;orf1ab polyprotein	1967	1975	VVAIDYKHY	HLA-A01:01;HLA-A25:01;HLA-A26:01;HLA-A29:02;HLA-A30:02;HLA-A36:01;HLA-B15:01;HLA-B46:01;HLA-B57:01;HLA-C02:02	0.537456498	0.596188055	0.362071749	False
orf1a polyprotein;orf1ab polyprotein	2050	2059	EVVENPTIQK	HLA-A03:01;HLA-A11:01;HLA-A26:01;HLA-A33:03;HLA-A68:01;HLA-A68:02	0.4600024	0.458568928	0.586718163	False
orf1a polyprotein;orf1ab polyprotein	3079	3087	AFNTLLFLM	HLA-A23:01;HLA-A24:02;HLA-A29:02;HLA-A31:01;HLA-C04:01;HLA-C14:02;HLA-C14:03	0.50581587	0.449814058	0.550940392	False
orf1a polyprotein;orf1ab polyprotein	135	143	SYGADLKSF	HLA-A23:01;HLA-A24:02;HLA-A25:01;HLA-C07:02;HLA-C14:02;HLA-C14:03	0.459714658	0.459422458	0.582928824	False
surface glycoprotein	292	299	ALDPLSET	HLA-A01:01;HLA-A02:07;HLA-C04:01;HLA-C05:01;HLA-C08:02	0.556484925	0.59906705	0.325782819	False
ORF10 protein	29	37	QVDVVNFNL	HLA-A01:01;HLA-A02:07;HLA-C04:01;HLA-C05:01;HLA-C08:02	0.556484925	0.59906705	0.325782819	False
orf1ab polyprotein	6973	6981	SWNADLYKL	HLA-A02:04;HLA-A23:01;HLA-A24:02;HLA-B27:05;HLA-B35:03;HLA-B38:01;HLA-B39:01;HLA-B40:02;HLA-B42:01;HLA-B81:01;HLA-C04:01	0.516790648	0.466826461	0.526296253	False
ORF7a protein	5	12	LFLALITL	HLA-A23:01;HLA-B08:01;HLA-B14:02;HLA-B51:01;HLA-B81:01;HLA-C03:02;HLA-C04:01;HLA-C14:02;HLA-C14:03	0.531598138	0.521194042	0.460727564	False
surface glycoprotein	1189	1197	VAKNLNESL	HLA-B46:01;HLA-B57:03;HLA-B81:01;HLA-C02:02;HLA-C03:03;HLA-C03:04;HLA-C08:01;HLA-C08:02;HLA-C12:02;HLA-C12:03	0.474402967	0.469015627	0.561090506	False
orf1ab polyprotein	4810	4818	DFYDFAVSK	HLA-A03:01;HLA-A11:01;HLA-A30:01;HLA-A33:03;HLA-A68:01;HLA-C14:02;HLA-C14:03	0.4429225	0.43525189	0.614831684	False
orf1ab polyprotein	4565	4573	RVYANLGER	HLA-A03:01;HLA-A11:01;HLA-A30:02;HLA-A31:01;HLA-A33:03;HLA-A68:01;HLA-A74:01	0.47141041	0.450963459	0.580160798	False
orf1a polyprotein;orf1ab polyprotein	3154	3161	YWFFSNYL	HLA-C03:02;HLA-C03:03;HLA-C03:04;HLA-C04:01;HLA-C14:02;HLA-C14:03;HLA-C17:01	0.492345075	0.455090288	0.556563872	False
orf1ab polyprotein	4779	4787	LLLDKRTTC	HLA-A02:01;HLA-A02:04;HLA-A32:01;HLA-B08:01	0.559703898	0.653805336	0.229493101	False
surface glycoprotein	2	11	FVFLVLLPLV	HLA-A02:01;HLA-A02:03;HLA-A02:04;HLA-A02:07;HLA-A68:02;HLA-B51:01;HLA-B54:01	0.511065637	0.559228789	0.436897208	False
membrane glycoprotein	138	146	LVIGAVILR	HLA-A03:01;HLA-A11:01;HLA-A31:01;HLA-A33:03;HLA-A68:01;HLA-A68:02;HLA-A74:01	0.470358221	0.449836607	0.579797867	False
surface glycoprotein	78	86	RFDNPVLPF	HLA-A23:01;HLA-A24:02;HLA-A29:02;HLA-C04:01;HLA-C08:02;HLA-C14:02;HLA-C14:03	0.518684675	0.468494521	0.517326575	False
orf1a polyprotein;orf1ab polyprotein	3900	3908	LAKDTTEAF	HLA-B15:01;HLA-B35:01;HLA-B35:03;HLA-B46:01;HLA-B53:01;HLA-B57:01;HLA-C02:02;HLA-C03:02;HLA-C03:03;HLA-C12:03	0.49244554	0.50631737	0.50547137	False
membrane glycoprotein	22	29	LVIGFLFL	HLA-A68:02;HLA-B51:01;HLA-C02:02;HLA-C03:02;HLA-C03:03;HLA-C03:04;HLA-C08:01;HLA-C15:02;HLA-C17:01	0.466940849	0.427815903	0.600104987	False
ORF3a protein	93	101	HLLLVAAGL	HLA-A02:01;HLA-A02:04;HLA-A02:07;HLA-B08:01;HLA-B48:01	0.535906036	0.621245927	0.311152878	False
orf1a polyprotein;orf1ab polyprotein	1948	1955	KKPASREL	HLA-B15:03;HLA-C01:02;HLA-C06:02;HLA-C07:02	0.456589106	0.471380357	0.570599644	False
orf1a polyprotein;orf1ab polyprotein	723	731	SREETGLLM	HLA-B27:05;HLA-B38:01;HLA-B39:01;HLA-C07:01;HLA-C07:02	0.525202611	0.590766258	0.369568617	False
orf1a polyprotein;orf1ab polyprotein	1702	1710	ARAGEAANF	HLA-B27:05;HLA-B38:01;HLA-B39:01;HLA-C07:01;HLA-C07:02	0.525202611	0.590766258	0.369568617	False
membrane glycoprotein	63	71	ACFVLAAVY	HLA-A29:02;HLA-A30:02;HLA-A32:01;HLA-A36:01;HLA-B15:01;HLA-B15:03;HLA-B35:01;HLA-B44:02;HLA-B44:03;HLA-C12:02;HLA-C14:02;HLA-C14:03	0.536469325	0.554561781	0.411042677	False
surface glycoprotein	892	900	AALQIPFAM	HLA-A29:02;HLA-B35:01;HLA-B35:03;HLA-C03:03;HLA-C03:04;HLA-C08:01;HLA-C12:02;HLA-C12:03	0.465620049	0.478835923	0.557059179	False
orf1a polyprotein;orf1ab polyprotein	3711	3719	LMNVLTLVY	HLA-A01:01;HLA-A29:02;HLA-A30:02;HLA-A32:01;HLA-A36:01;HLA-B15:01;HLA-B35:01;HLA-B46:01;HLA-C03:02	0.517415437	0.563755389	0.423491273	False
ORF8 protein	32	42	VVDDPCPIHFY	HLA-A01:01;HLA-A02:07;HLA-A03:01;HLA-A26:01;HLA-A29:02;HLA-A30:02;HLA-A36:01	0.552244032	0.624010288	0.29688421	False
orf1a polyprotein;orf1ab polyprotein	740	747	IFLEGETL	HLA-A23:01;HLA-A24:02;HLA-B14:02;HLA-C04:01;HLA-C08:01;HLA-C14:02;HLA-C14:03	0.477660224	0.411845992	0.598870044	False
orf1a polyprotein;orf1ab polyprotein	3103	3112	GVYSVIYLYL	HLA-A03:01;HLA-A11:01;HLA-A25:01;HLA-A26:01;HLA-A30:01;HLA-A68:02;HLA-C08:01;HLA-C17:01	0.478485456	0.474939869	0.544464141	False
orf1ab polyprotein	5365	5373	LVLSVNPYV	HLA-A02:01;HLA-A02:04;HLA-A02:07;HLA-A30:01;HLA-A68:02;HLA-B51:01	0.535673983	0.576061789	0.37913034	False
surface glycoprotein	937	945	SLSSTASAL	HLA-A02:01;HLA-A02:03;HLA-A02:04;HLA-B15:09;HLA-B48:01;HLA-B81:01;HLA-C01:02;HLA-C14:03;HLA-C17:01	0.500532878	0.539967072	0.470259008	False
orf1a polyprotein;orf1ab polyprotein	2772	2780	QLIKVTLVF	HLA-A23:01;HLA-A24:02;HLA-A25:01;HLA-A26:01;HLA-A29:02;HLA-A32:01;HLA-B15:01;HLA-B15:03;HLA-B46:01;HLA-C17:01	0.494224789	0.473288798	0.527729874	False
surface glycoprotein	169	177	EYVSQPFLM	HLA-A23:01;HLA-A24:02;HLA-A33:03;HLA-C07:02	0.440914979	0.421379931	0.620453241	False
orf1a polyprotein;orf1ab polyprotein	1174	1182	YLAVFDKNL	HLA-A02:01;HLA-A02:03;HLA-A02:04;HLA-C06:02;HLA-C17:01	0.540016601	0.598311165	0.334774361	False
orf1a polyprotein;orf1ab polyprotein	4183	4191	ALLSDLQDL	HLA-A02:01;HLA-A02:03;HLA-A02:04;HLA-A02:07;HLA-A32:01;HLA-B13:02;HLA-B48:01;HLA-C17:01	0.519219397	0.577321765	0.391054993	False
surface glycoprotein	947	955	KLQDVVNQN	HLA-A02:01;HLA-A02:03;HLA-A02:04;HLA-A02:07;HLA-A30:02;HLA-A32:01;HLA-A74:01;HLA-B13:02	0.53308801	0.582915544	0.365677516	False
ORF7a protein	67	75	CPDGVKHVY	HLA-A01:01;HLA-A30:02;HLA-A36:01;HLA-B35:01;HLA-B35:03;HLA-B42:01;HLA-B53:01;HLA-C07:01	0.570329944	0.602300784	0.277459592	False
membrane glycoprotein	94	103	SYFIASFRLF	HLA-A23:01;HLA-A24:02;HLA-A29:02;HLA-B44:02;HLA-B44:03;HLA-B57:01;HLA-C14:02;HLA-C14:03	0.494826312	0.507899185	0.496428899	False
orf1ab polyprotein	6431	6439	FSLWVYKQF	HLA-A25:01;HLA-B46:01;HLA-B57:01;HLA-B57:03;HLA-B58:02;HLA-C02:02;HLA-C03:02;HLA-C03:03;HLA-C03:04;HLA-C12:02;HLA-C12:03	0.466101217	0.47808694	0.546713323	False
orf1ab polyprotein	4847	4855	YYRYNLPTM	HLA-A24:02;HLA-C03:02;HLA-C07:02;HLA-C14:02;HLA-C14:03	0.411713706	0.416057647	0.637707584	False
membrane glycoprotein	9	17	TVEELKKLL	HLA-A01:01;HLA-A02:07;HLA-A68:02;HLA-B08:01;HLA-B35:03;HLA-B42:01;HLA-C05:01;HLA-C08:02	0.549705917	0.624691336	0.26429746	False
orf1a polyprotein;orf1ab polyprotein	1883	1892	KLDGVVCTEI	HLA-A02:01;HLA-A02:07;HLA-C05:01;HLA-C08:02	0.546345031	0.625005721	0.275870171	False
orf1a polyprotein;orf1ab polyprotein	89	97	VAELEGIQY	HLA-A01:01;HLA-A29:02;HLA-A36:01;HLA-B15:01;HLA-B15:03;HLA-B35:01;HLA-B53:01;HLA-C02:02;HLA-C12:03	0.567465344	0.598180863	0.284505278	False
orf1a polyprotein;orf1ab polyprotein	3423	3430	CYMHHMEL	HLA-B14:02;HLA-C04:01;HLA-C07:02;HLA-C14:02;HLA-C14:03	0.502385758	0.495495818	0.494343115	False
orf1ab polyprotein	5137	5145	FYAYLRKHF	HLA-A24:02;HLA-A29:02;HLA-C07:02;HLA-C14:02;HLA-C14:03	0.443303305	0.455346836	0.581484103	False
membrane glycoprotein	39	47	YANRNRFLY	HLA-A01:01;HLA-A29:02;HLA-A30:02;HLA-A36:01;HLA-B35:01;HLA-B53:01;HLA-C02:02;HLA-C03:02;HLA-C12:02;HLA-C12:03	0.544854155	0.55509389	0.382526009	False
orf1a polyprotein;orf1ab polyprotein	1327	1337	TTYPGQGLNGY	HLA-A01:01;HLA-A03:01;HLA-A25:01;HLA-A26:01;HLA-A30:02;HLA-A32:01;HLA-A36:01	0.559734415	0.645510748	0.24285638	False
orf1a polyprotein;orf1ab polyprotein	4221	4228	KGPKVKYL	HLA-C01:02;HLA-C06:02;HLA-C07:02	0.443649838	0.470438156	0.570359079	False
orf1ab polyprotein	6028	6036	TNLPLQLGF	HLA-A23:01;HLA-A24:02;HLA-A29:02;HLA-A32:01;HLA-B44:02;HLA-B44:03;HLA-B57:01	0.511237718	0.532141224	0.446017377	False
orf1ab polyprotein	5318	5326	TPHTVLQAV	HLA-B07:02;HLA-B08:01;HLA-B13:02;HLA-B35:03;HLA-B42:01;HLA-B51:01;HLA-B54:01;HLA-B55:01;HLA-B81:01	0.522424784	0.602999194	0.346893578	False
orf1a polyprotein;orf1ab polyprotein	3781	3788	LVYCFLGY	HLA-A01:01;HLA-A03:01;HLA-A29:02;HLA-A36:01;HLA-B15:01;HLA-C03:02	0.540624655	0.630814744	0.2952156	False
orf1a polyprotein;orf1ab polyprotein	3020	3027	GVDAVNLL	HLA-A01:01;HLA-C04:01;HLA-C05:01;HLA-C08:02;HLA-C17:01	0.57416281	0.606032082	0.261338797	False
surface glycoprotein	853	861	QKFNGLTVL	HLA-B14:02;HLA-B15:03;HLA-B15:09;HLA-B38:01;HLA-B39:01;HLA-B48:01;HLA-C06:02;HLA-C07:02;HLA-C12:02	0.488841364	0.510023143	0.488952447	False
orf1a polyprotein;orf1ab polyprotein	1176	1184	AVFDKNLYD	HLA-A03:01;HLA-A11:01;HLA-A26:01;HLA-A29:02;HLA-A30:01;HLA-A32:01	0.48707303	0.51961239	0.480058055	False
orf1a polyprotein;orf1ab polyprotein	3309	3317	SEDMLNPNY	HLA-A01:01;HLA-B18:01;HLA-B40:01;HLA-B44:02;HLA-B44:03	0.51762709	0.606291953	0.335954266	False
orf1a polyprotein;orf1ab polyprotein	3063	3071	YFMRFRRAF	HLA-A23:01;HLA-A24:02;HLA-A29:02;HLA-C03:02;HLA-C04:01;HLA-C14:02;HLA-C14:03	0.482421061	0.420506795	0.574855671	False
orf1ab polyprotein	5527	5535	GDYGDAVVY	HLA-A29:02;HLA-A30:02;HLA-B15:01;HLA-B15:03;HLA-B18:01;HLA-B35:01;HLA-B46:01;HLA-B53:01;HLA-C07:01	0.559806441	0.565070416	0.337456005	False
orf1a polyprotein;orf1ab polyprotein	4142	4149	NELSPVAL	HLA-B08:01;HLA-B14:02;HLA-B18:01;HLA-B37:01;HLA-B39:01;HLA-B40:01;HLA-B40:02;HLA-B44:02	0.524525417	0.617890578	0.319622478	False
orf1a polyprotein;orf1ab polyprotein	2226	2234	LINIIIWFL	HLA-A02:04;HLA-A02:07;HLA-C02:02;HLA-C03:03;HLA-C03:04;HLA-C06:02;HLA-C15:02;HLA-C17:01	0.495113038	0.49916071	0.491056371	False
surface glycoprotein	258	266	WTAGAAAYY	HLA-A01:01;HLA-A25:01;HLA-A26:01;HLA-A29:02;HLA-A30:02;HLA-A36:01;HLA-B57:01;HLA-B58:01;HLA-C02:02;HLA-C12:03	0.539182419	0.584180558	0.343341531	False
orf1a polyprotein;orf1ab polyprotein	292	300	KLDGFMGRI	HLA-A02:01;HLA-A02:07;HLA-A36:01;HLA-B13:02;HLA-C05:01	0.532371121	0.612268507	0.303542075	False
orf1a polyprotein;orf1ab polyprotein	2884	2892	FLPRVFSAV	HLA-A02:01;HLA-A02:03;HLA-A02:04;HLA-A02:07;HLA-C01:02	0.474694585	0.532977713	0.483007148	False
orf1a polyprotein;orf1ab polyprotein	3403	3411	FLNGSCGSV	HLA-A02:01;HLA-A02:03;HLA-A02:04;HLA-A02:07;HLA-C01:02	0.474694585	0.532977713	0.483007148	False
orf1ab polyprotein	4860	4867	QLLFVVEV	HLA-A02:01;HLA-A02:04;HLA-B08:01;HLA-B52:01	0.542119397	0.629081248	0.265119598	False
orf1a polyprotein;orf1ab polyprotein	3106	3115	SVIYLYLTFY	HLA-A03:01;HLA-A11:01;HLA-A25:01;HLA-A26:01;HLA-A29:02;HLA-A30:02;HLA-C02:02	0.507555742	0.533610412	0.436639455	False
orf1ab polyprotein	5544	5551	NVGDYFVL	HLA-C07:01;HLA-C07:02;HLA-C08:01	0.487718299	0.53310111	0.458877928	False
orf1ab polyprotein	6833	6842	TLPKGIMMNV	HLA-A02:01;HLA-A02:03;HLA-A02:07;HLA-C01:02	0.473977342	0.532977713	0.483007148	False
orf1a polyprotein;orf1ab polyprotein	791	799	LEIKDTEKY	HLA-B15:01;HLA-B15:03;HLA-B18:01;HLA-B40:01;HLA-B40:02;HLA-B44:02;HLA-B44:03;HLA-B49:01;HLA-B53:01	0.535144628	0.55958195	0.37447719	False
orf1ab polyprotein	6315	6322	DRYPANSI	HLA-B14:02;HLA-B15:09;HLA-B39:01;HLA-B51:01;HLA-C06:02;HLA-C07:02	0.486038634	0.521281898	0.469647925	False
orf1a polyprotein;orf1ab polyprotein	4051	4059	NARDGCVPL	HLA-B46:01;HLA-C02:02;HLA-C03:02;HLA-C03:03;HLA-C03:04;HLA-C08:01;HLA-C12:02;HLA-C12:03	0.419618589	0.412922236	0.623212295	False
orf1ab polyprotein	4892	4900	KSAGFPFNK	HLA-A03:01;HLA-A11:01;HLA-A30:01;HLA-A31:01;HLA-A68:01;HLA-A74:01;HLA-B58:01;HLA-B58:02	0.476114662	0.460382462	0.536899857	False
orf1ab polyprotein	4655	4662	KPYIKWDL	HLA-B07:02;HLA-B08:01;HLA-B14:02;HLA-B42:01;HLA-B81:01;HLA-C07:01	0.575374081	0.655819085	0.157108902	False
orf1a polyprotein;orf1ab polyprotein	3744	3752	YSGVVTTVM	HLA-B46:01;HLA-C02:02;HLA-C03:02;HLA-C03:03;HLA-C03:04;HLA-C12:02;HLA-C12:03;HLA-C15:02	0.435371464	0.441004524	0.587611086	False
orf1a polyprotein;orf1ab polyprotein	829	837	TVIEVQGYK	HLA-A03:01;HLA-A11:01;HLA-A26:01;HLA-A30:01;HLA-A30:02;HLA-A68:01;HLA-A68:02	0.497802804	0.489446879	0.487344	False
orf1ab polyprotein	5946	5954	TQAPTHLSV	HLA-A02:03;HLA-A02:04;HLA-B13:02;HLA-B14:02;HLA-B15:01;HLA-B15:09;HLA-B38:01;HLA-B39:01;HLA-B52:01;HLA-C02:02;HLA-C06:02;HLA-C12:02;HLA-C15:02	0.48344967	0.505820392	0.484794795	False
orf1a polyprotein;orf1ab polyprotein	2488	2496	SYIVDSVTV	HLA-A23:01;HLA-A24:02;HLA-A30:01;HLA-B15:09;HLA-B39:01;HLA-B41:01;HLA-B49:01;HLA-C04:01;HLA-C14:02;HLA-C14:03	0.493236372	0.424206864	0.550157225	False
orf1a polyprotein;orf1ab polyprotein	1537	1544	YTSNPTTF	HLA-B57:03;HLA-B58:01;HLA-B58:02;HLA-C02:02;HLA-C03:02;HLA-C03:03;HLA-C04:01;HLA-C12:02;HLA-C12:03	0.498679444	0.45342789	0.518431276	False
orf1a polyprotein;orf1ab polyprotein	2589	2598	KMFDAYVNTF	HLA-A02:03;HLA-A23:01;HLA-A24:02;HLA-A32:01;HLA-B15:01;HLA-B15:03;HLA-B57:01;HLA-B57:03;HLA-B58:01;HLA-C14:02;HLA-C14:03	0.447997253	0.422077755	0.589025766	False
orf1a polyprotein;orf1ab polyprotein	540	548	AARVVRSIF	HLA-B07:02;HLA-B15:01;HLA-B15:03;HLA-B46:01;HLA-B57:01;HLA-C02:02;HLA-C03:02;HLA-C12:02;HLA-C12:03	0.488159906	0.535969835	0.447658071	False
orf1ab polyprotein	6003	6011	EAIRHVRAW	HLA-A25:01;HLA-A26:01;HLA-A33:03;HLA-B35:03;HLA-B44:02;HLA-B53:01;HLA-B57:01;HLA-B58:01;HLA-C03:04;HLA-C12:02	0.455040027	0.46439641	0.549440285	False
orf1a polyprotein;orf1ab polyprotein	2167	2176	NYMPYFFTLL	HLA-A23:01;HLA-A24:02;HLA-C07:02;HLA-C14:02;HLA-C14:03	0.441738726	0.435432224	0.582355333	False
orf1ab polyprotein	6344	6351	LYVNKHAF	HLA-A23:01;HLA-A24:02;HLA-C07:02;HLA-C14:02;HLA-C14:03	0.441738726	0.435432224	0.582355333	False
orf1ab polyprotein	6316	6324	RYPANSIVC	HLA-A23:01;HLA-A24:02;HLA-C07:02;HLA-C14:02;HLA-C14:03	0.441738726	0.435432224	0.582355333	False
orf1a polyprotein;orf1ab polyprotein	2787	2796	FYLITPVHVM	HLA-A23:01;HLA-A24:02;HLA-C07:02;HLA-C14:02;HLA-C14:03	0.441738726	0.435432224	0.582355333	False
orf1a polyprotein;orf1ab polyprotein	1971	1979	DYKHYTPSF	HLA-A23:01;HLA-A24:02;HLA-C07:02;HLA-C14:02;HLA-C14:03	0.441738726	0.435432224	0.582355333	False
orf1ab polyprotein	6688	6697	VYGDFSHSQL	HLA-A23:01;HLA-A24:02;HLA-C07:02;HLA-C14:02;HLA-C14:03	0.441738726	0.435432224	0.582355333	False
orf1ab polyprotein	6688	6696	VYGDFSHSQ	HLA-A23:01;HLA-A24:02;HLA-C07:02;HLA-C14:02;HLA-C14:03	0.441738726	0.435432224	0.582355333	False
orf1a polyprotein;orf1ab polyprotein	2391	2399	YYVWKSYVH	HLA-A23:01;HLA-A24:02;HLA-C07:02;HLA-C14:02;HLA-C14:03	0.441738726	0.435432224	0.582355333	False
ORF10 protein	2	9	GYINVFAF	HLA-A23:01;HLA-A24:02;HLA-C07:02;HLA-C14:02;HLA-C14:03	0.441738726	0.435432224	0.582355333	False
surface glycoprotein	37	46	YYPDKVFRSS	HLA-A23:01;HLA-A24:02;HLA-C07:02;HLA-C14:02;HLA-C14:03	0.441738726	0.435432224	0.582355333	False
surface glycoprotein	395	402	VYADSFVI	HLA-A23:01;HLA-A24:02;HLA-C07:02;HLA-C14:02;HLA-C14:03	0.441738726	0.435432224	0.582355333	False
orf1ab polyprotein	5254	5261	LAIDAYPL	HLA-B35:03;HLA-B51:01;HLA-B58:02;HLA-C03:02;HLA-C03:03;HLA-C03:04;HLA-C08:01;HLA-C12:03;HLA-C17:01	0.441171994	0.427119302	0.590044563	False
orf1a polyprotein;orf1ab polyprotein	3560	3568	VRQCSGVTF	HLA-A24:02;HLA-B27:05;HLA-B38:01;HLA-B39:01;HLA-C07:02;HLA-C14:03	0.442460499	0.472295575	0.552200831	False
orf1a polyprotein;orf1ab polyprotein	2437	2444	YANGGKGF	HLA-B15:01;HLA-B15:03;HLA-B46:01;HLA-B53:01;HLA-C02:02;HLA-C03:02;HLA-C03:03;HLA-C03:04;HLA-C12:03	0.482395086	0.48045076	0.505866113	False
nucleocapsid phosphoprotein	9	17	QRNAPRITF	HLA-B27:05;HLA-B38:01;HLA-C07:01;HLA-C07:02	0.515994089	0.582391676	0.352228211	False
surface glycoprotein	497	505	FQPTNGVGY	HLA-A26:01;HLA-A29:02;HLA-B15:01;HLA-B15:03;HLA-C02:02;HLA-C07:02;HLA-C14:02;HLA-C14:03	0.491299979	0.509312244	0.466715619	False
ORF10 protein	12	20	TIYSLLLCR	HLA-A03:01;HLA-A11:01;HLA-A31:01;HLA-A33:03;HLA-A68:01;HLA-A74:01	0.443429973	0.437229968	0.57943478	False
membrane glycoprotein	142	150	AVILRGHLR	HLA-A03:01;HLA-A11:01;HLA-A31:01;HLA-A33:03;HLA-A68:01;HLA-A74:01	0.443429973	0.437229968	0.57943478	False
orf1ab polyprotein	4417	4425	GTSTDVVYR	HLA-A03:01;HLA-A11:01;HLA-A31:01;HLA-A33:03;HLA-A68:01;HLA-A74:01	0.443429973	0.437229968	0.57943478	False
ORF3a protein	117	126	SINFVRIIMR	HLA-A03:01;HLA-A11:01;HLA-A31:01;HLA-A33:03;HLA-A68:01;HLA-A74:01	0.443429973	0.437229968	0.57943478	False
ORF7a protein	110	118	ITLCFTLKR	HLA-A03:01;HLA-A11:01;HLA-A31:01;HLA-A33:03;HLA-A68:01;HLA-A74:01	0.443429973	0.437229968	0.57943478	False
orf1ab polyprotein	6875	6884	GVAPGTAVLR	HLA-A03:01;HLA-A11:01;HLA-A31:01;HLA-A33:03;HLA-A68:01;HLA-A74:01	0.443429973	0.437229968	0.57943478	False
surface glycoprotein	394	403	NVYADSFVIR	HLA-A03:01;HLA-A11:01;HLA-A31:01;HLA-A33:03;HLA-A68:01;HLA-A74:01	0.443429973	0.437229968	0.57943478	False
membrane glycoprotein	150	158	RIAGHHLGR	HLA-A03:01;HLA-A11:01;HLA-A31:01;HLA-A33:03;HLA-A68:01;HLA-A74:01	0.443429973	0.437229968	0.57943478	False
orf1a polyprotein;orf1ab polyprotein	710	718	VTHSKGLYR	HLA-A03:01;HLA-A11:01;HLA-A31:01;HLA-A33:03;HLA-A68:01;HLA-A74:01	0.443429973	0.437229968	0.57943478	False
orf1a polyprotein;orf1ab polyprotein	681	688	LVNKFLAL	HLA-B08:01;HLA-B42:01;HLA-B81:01;HLA-C03:02;HLA-C03:03;HLA-C03:04;HLA-C08:01;HLA-C15:02;HLA-C17:01	0.457697591	0.464599188	0.554867931	False
orf1a polyprotein;orf1ab polyprotein	567	576	ITILDGISQY	HLA-A01:01;HLA-A25:01;HLA-A26:01;HLA-A29:02;HLA-A30:02;HLA-A32:01;HLA-A36:01;HLA-B15:01;HLA-B15:03;HLA-B57:01;HLA-B57:03	0.544087661	0.601615399	0.286263248	False
orf1a polyprotein;orf1ab polyprotein	3100	3110	FLPGVYSVIYL	HLA-A02:01;HLA-A02:07;HLA-C01:02;HLA-C17:01	0.490471732	0.539373266	0.44467989	False
orf1ab polyprotein	6567	6574	ICAPLTVF	HLA-A24:02;HLA-B15:01;HLA-B15:03;HLA-B18:01;HLA-B57:01;HLA-B57:03;HLA-B58:01;HLA-C02:02;HLA-C03:02	0.462600716	0.452437749	0.548181447	False
orf1a polyprotein;orf1ab polyprotein	3597	3605	STQWSLFFF	HLA-A11:01;HLA-A24:02;HLA-A29:02;HLA-B57:01;HLA-B57:03;HLA-C02:02	0.426168677	0.418508066	0.61362585	False
orf1a polyprotein;orf1ab polyprotein	749	758	TEVLTEEVVL	HLA-B40:01;HLA-B40:02;HLA-B44:02;HLA-B44:03;HLA-B48:01;HLA-C07:01	0.509422099	0.562756687	0.380173289	False
orf1a polyprotein;orf1ab polyprotein	2804	2812	SEIIGYKAI	HLA-B14:02;HLA-B18:01;HLA-B40:01;HLA-B40:02;HLA-B41:01;HLA-B44:02;HLA-B44:03;HLA-B45:01;HLA-B49:01;HLA-B50:01;HLA-B52:01	0.520110863	0.540749818	0.394902706	False
ORF10 protein	5	14	NVFAFPFTIY	HLA-A03:01;HLA-A25:01;HLA-A26:01;HLA-A29:02;HLA-A30:02;HLA-B15:01;HLA-B18:01;HLA-B35:01	0.548603519	0.595868277	0.27848106	False
orf1ab polyprotein	6434	6442	WVYKQFDTY	HLA-A03:01;HLA-A25:01;HLA-A26:01;HLA-A29:02;HLA-A30:02;HLA-A32:01;HLA-A36:01;HLA-B15:01;HLA-B15:03;HLA-B53:01;HLA-C02:02;HLA-C03:02	0.560895168	0.569582636	0.306139221	False
ORF3a protein	220	227	STDTGVEH	HLA-A01:01;HLA-A36:01;HLA-C04:01;HLA-C05:01;HLA-C08:02	0.557257547	0.59912514	0.259036516	False
orf1a polyprotein;orf1ab polyprotein	2092	2100	HTDLMAAYV	HLA-A01:01;HLA-A36:01;HLA-C04:01;HLA-C05:01;HLA-C08:02	0.557257547	0.59912514	0.259036516	False
orf1ab polyprotein	5150	5157	LSDDAVVC	HLA-A01:01;HLA-A36:01;HLA-C04:01;HLA-C05:01;HLA-C08:02	0.557257547	0.59912514	0.259036516	False
orf1a polyprotein;orf1ab polyprotein	2799	2806	HTDFSSEI	HLA-A01:01;HLA-A36:01;HLA-C04:01;HLA-C05:01;HLA-C08:02	0.557257547	0.59912514	0.259036516	False
surface glycoprotein	687	695	VASQSIIAY	HLA-A29:02;HLA-A30:02;HLA-A36:01;HLA-B15:01;HLA-B15:03;HLA-B35:01;HLA-B46:01;HLA-B53:01;HLA-B57:01;HLA-C02:02;HLA-C03:02;HLA-C12:02;HLA-C12:03	0.508141503	0.479705047	0.471774343	False
surface glycoprotein	448	455	NYNYLYRL	HLA-A23:01;HLA-C04:01;HLA-C07:02;HLA-C14:02	0.502395141	0.480512812	0.475693889	False
orf1a polyprotein;orf1ab polyprotein	529	536	ILSPLYAF	HLA-A24:02;HLA-B08:01;HLA-B15:01;HLA-B37:01;HLA-B58:01;HLA-C03:02	0.436202258	0.481075914	0.542894597	False
surface glycoprotein	334	342	NLCPFGEVF	HLA-A23:01;HLA-A24:02;HLA-A26:01;HLA-A32:01;HLA-B15:01;HLA-B15:03;HLA-B38:01;HLA-B46:01;HLA-C03:02	0.440662192	0.422661021	0.580391624	False
orf1ab polyprotein	6589	6597	ARNGVLITE	HLA-B27:05;HLA-B39:01;HLA-C07:01;HLA-C07:02	0.507523856	0.57148438	0.363688867	False
orf1ab polyprotein	4588	4597	MRNAGIVGVL	HLA-B27:05;HLA-B39:01;HLA-C07:01;HLA-C07:02	0.507523856	0.57148438	0.363688867	False
orf1ab polyprotein	6102	6109	LSDRVVFV	HLA-A01:01;HLA-C04:01;HLA-C05:01;HLA-C08:02	0.553440299	0.59906705	0.259036516	False
orf1ab polyprotein	4998	5007	YSDVENPHLM	HLA-A01:01;HLA-C04:01;HLA-C05:01;HLA-C08:02	0.553440299	0.59906705	0.259036516	False
orf1ab polyprotein	6746	6754	VIDLLLDDF	HLA-A01:01;HLA-C04:01;HLA-C05:01;HLA-C08:02	0.553440299	0.59906705	0.259036516	False
orf1ab polyprotein	6419	6426	YLDAYNMM	HLA-A01:01;HLA-C04:01;HLA-C05:01;HLA-C08:02	0.553440299	0.59906705	0.259036516	False
orf1a polyprotein;orf1ab polyprotein	1438	1446	LNDLNETLV	HLA-A01:01;HLA-C04:01;HLA-C05:01;HLA-C08:02	0.553440299	0.59906705	0.259036516	False
orf1ab polyprotein	5130	5137	DTDFVNEF	HLA-A01:01;HLA-C04:01;HLA-C05:01;HLA-C08:02	0.553440299	0.59906705	0.259036516	False
envelope protein	15	23	NSVLLFLAF	HLA-B15:03;HLA-B18:01;HLA-B35:01;HLA-B44:02;HLA-B57:01;HLA-C03:02;HLA-C03:03;HLA-C08:01;HLA-C15:02	0.469509622	0.495858883	0.509298553	False
surface glycoprotein	1059	1067	GVVFLHVTY	HLA-A11:01;HLA-A25:01;HLA-A29:02;HLA-A30:01;HLA-A30:02;HLA-A36:01;HLA-B15:01;HLA-B15:03;HLA-B35:01;HLA-B53:01;HLA-B57:01	0.499637544	0.475063558	0.483577317	False
orf1ab polyprotein	6456	6464	NVAFNVVNK	HLA-A03:01;HLA-A11:01;HLA-A30:01;HLA-A33:03;HLA-A68:01;HLA-A68:02	0.452144359	0.434661428	0.562788112	False
orf1a polyprotein;orf1ab polyprotein	1116	1124	HVVGPNVNK	HLA-A03:01;HLA-A11:01;HLA-A30:01;HLA-A33:03;HLA-A68:01;HLA-A68:02	0.452144359	0.434661428	0.562788112	False
ORF3a protein	227	235	HVTFFIYNK	HLA-A03:01;HLA-A11:01;HLA-A30:01;HLA-A33:03;HLA-A68:01;HLA-A68:02	0.452144359	0.434661428	0.562788112	False
surface glycoprotein	3	11	VFLVLLPLV	HLA-A02:04;HLA-A23:01;HLA-A24:02;HLA-B51:01;HLA-B52:01;HLA-C04:01	0.48030901	0.425817853	0.544514401	False
orf1a polyprotein;orf1ab polyprotein	2069	2077	TEVVGDIIL	HLA-B14:02;HLA-B18:01;HLA-B35:03;HLA-B38:01;HLA-B40:01;HLA-B40:02;HLA-B41:01;HLA-B44:02;HLA-B44:03;HLA-B49:01	0.514360802	0.561517648	0.366845596	False
orf1a polyprotein;orf1ab polyprotein	232	240	REHEHEIAW	HLA-B18:01;HLA-B37:01;HLA-B40:01;HLA-B40:02;HLA-B41:01;HLA-B44:02;HLA-B44:03;HLA-B45:01;HLA-B49:01;HLA-B50:01;HLA-B58:01	0.492843417	0.509915996	0.447401043	False
surface glycoprotein	171	179	VSQPFLMDL	HLA-B57:03;HLA-C02:02;HLA-C03:02;HLA-C03:03;HLA-C03:04;HLA-C12:02;HLA-C12:03;HLA-C15:02;HLA-C17:01	0.463862192	0.451285166	0.534098195	False
surface glycoprotein	982	989	SRLDKVEA	HLA-B14:02;HLA-B39:01;HLA-C07:01;HLA-C07:02	0.512425604	0.570060674	0.354077703	False
surface glycoprotein	327	334	VRFPNITN	HLA-B14:02;HLA-B39:01;HLA-C07:01;HLA-C07:02	0.512425604	0.570060674	0.354077703	False
ORF7a protein	78	86	RARSVSPKL	HLA-A30:01;HLA-B07:02;HLA-B42:01;HLA-B48:01;HLA-B57:03;HLA-B58:01;HLA-B58:02;HLA-B81:01;HLA-C02:02;HLA-C05:01;HLA-C12:03;HLA-C15:02	0.532551088	0.540742956	0.363332568	False
ORF3a protein	113	120	YFLQSINF	HLA-A23:01;HLA-A24:02;HLA-A29:02;HLA-B37:01;HLA-C04:01;HLA-C14:02;HLA-C14:03	0.48471495	0.434143573	0.527075446	False
orf1a polyprotein;orf1ab polyprotein	2734	2742	KKNNLPFKL	HLA-A02:04;HLA-A32:01;HLA-B15:03;HLA-B48:01;HLA-C06:02;HLA-C07:02;HLA-C15:02	0.469765599	0.489936685	0.488947181	False
orf1ab polyprotein	6612	6619	ASLNGVTL	HLA-B48:01;HLA-B57:03;HLA-B58:01;HLA-B58:02;HLA-B81:01;HLA-C03:02;HLA-C03:03;HLA-C03:04;HLA-C08:01;HLA-C14:02;HLA-C14:03;HLA-C15:02;HLA-C17:01	0.395537499	0.327207838	0.676937212	False
orf1a polyprotein;orf1ab polyprotein	3833	3840	NSIDAFKL	HLA-B39:01;HLA-B58:01;HLA-B58:02;HLA-C03:03;HLA-C03:04;HLA-C08:01;HLA-C12:02;HLA-C12:03;HLA-C15:02	0.406519819	0.399199747	0.618920339	False
surface glycoprotein	263	270	AAYYVGYL	HLA-C02:02;HLA-C03:02;HLA-C03:03;HLA-C03:04;HLA-C08:01;HLA-C12:02;HLA-C12:03;HLA-C17:01	0.441987026	0.423098988	0.574400336	False
orf1a polyprotein;orf1ab polyprotein	994	1002	SEDNQTTTI	HLA-B13:02;HLA-B38:01;HLA-B40:01;HLA-B40:02;HLA-B41:01;HLA-B44:02;HLA-B44:03;HLA-B45:01;HLA-B49:01;HLA-B52:01;HLA-C08:02	0.501585306	0.528076444	0.411407916	False
orf1ab polyprotein	5926	5934	AENVTGLFK	HLA-A03:01;HLA-A11:01;HLA-B44:02;HLA-B44:03;HLA-B45:01	0.48103853	0.53091999	0.432346842	False
nucleocapsid phosphoprotein	361	369	KTFPPTEPK	HLA-A03:01;HLA-A11:01;HLA-A30:01;HLA-A32:01;HLA-A74:01;HLA-B57:01;HLA-B58:01	0.458058284	0.477536215	0.508995823	False
envelope protein	13	20	IVNSVLLF	HLA-A29:02;HLA-B15:01;HLA-B53:01;HLA-B57:01;HLA-B58:01;HLA-C02:02;HLA-C04:01;HLA-C15:02;HLA-C17:01	0.534814749	0.490170187	0.415315764	False
orf1ab polyprotein	5613	5622	SHFAIGLALY	HLA-A03:01;HLA-A29:02;HLA-A30:02;HLA-A36:01;HLA-B15:03;HLA-B35:01;HLA-B38:01;HLA-B44:02;HLA-B44:03	0.565409462	0.595955476	0.230577172	False
ORF7b	16	24	FLLFLVLIM	HLA-A02:01;HLA-A02:04;HLA-A29:02;HLA-C08:01;HLA-C12:02;HLA-C17:01	0.515272782	0.563892579	0.375905911	False
orf1a polyprotein;orf1ab polyprotein	1859	1867	YKGPITDVF	HLA-A24:02;HLA-B15:03;HLA-B48:01;HLA-C02:02;HLA-C07:02	0.456582001	0.450882939	0.536257991	False
orf1a polyprotein;orf1ab polyprotein	2616	2624	AEAELAKNV	HLA-B13:02;HLA-B18:01;HLA-B37:01;HLA-B40:01;HLA-B40:02;HLA-B41:01;HLA-B44:02;HLA-B44:03;HLA-B45:01;HLA-B49:01;HLA-B50:01	0.503275609	0.539881978	0.394887148	False
orf1ab polyprotein	7086	7094	VVISSDVLV	HLA-A02:01;HLA-A02:07;HLA-A68:02;HLA-C02:02;HLA-C15:02	0.523150924	0.568835742	0.335446648	False
orf1a polyprotein;orf1ab polyprotein	3973	3980	SEVVLKKL	HLA-B14:02;HLA-B18:01;HLA-B37:01;HLA-B40:01;HLA-B40:02;HLA-B44:02;HLA-B44:03;HLA-B49:01;HLA-B52:01	0.499131368	0.537205516	0.40061436	False
orf1ab polyprotein	6954	6961	FIQQKLAL	HLA-B08:01;HLA-C03:02;HLA-C03:03;HLA-C03:04;HLA-C08:01;HLA-C08:02;HLA-C17:01	0.466525964	0.490070595	0.492031413	False
orf1a polyprotein;orf1ab polyprotein	2553	2561	SAKSASVYY	HLA-A29:02;HLA-A30:01;HLA-A30:02;HLA-B15:01;HLA-B15:03;HLA-B35:01;HLA-B46:01;HLA-B53:01;HLA-B57:01;HLA-C02:02;HLA-C12:02;HLA-C12:03	0.519533751	0.492468586	0.425300736	False
orf1a polyprotein;orf1ab polyprotein	468	476	KLNEEIAII	HLA-A02:01;HLA-A02:03;HLA-A02:04;HLA-A02:07;HLA-A32:01;HLA-B13:02	0.495758726	0.571177158	0.363045265	False
orf1a polyprotein;orf1ab polyprotein	3096	3104	PVYSFLPGV	HLA-A02:01;HLA-A02:03;HLA-A02:04;HLA-A02:07;HLA-A26:01;HLA-A68:02	0.500917928	0.556404039	0.37463536	False
surface glycoprotein	634	643	RVYSTGSNVF	HLA-A23:01;HLA-A26:01;HLA-A30:02;HLA-A32:01;HLA-B15:01;HLA-B15:03;HLA-B57:01;HLA-B57:03;HLA-B58:01;HLA-C07:01	0.532300443	0.542036587	0.351406385	False
ORF9b protein	86	96	ELPDEFVVVTV	HLA-A02:01;HLA-A02:03;HLA-A02:07;HLA-A26:01;HLA-A68:02	0.500191864	0.556404039	0.37463536	False
membrane glycoprotein	55	62	WLLWPVTL	HLA-A02:01;HLA-A02:04;HLA-B08:01;HLA-C17:01	0.54340031	0.625845501	0.209134189	False
orf1a polyprotein;orf1ab polyprotein	150	157	GTDPYEDF	HLA-A01:01;HLA-A36:01;HLA-B58:01;HLA-C04:01;HLA-C05:01	0.525865491	0.561610062	0.336361219	False
ORF8 protein	14	22	AAFHQECSL	HLA-B35:03;HLA-B48:01;HLA-C02:02;HLA-C03:03;HLA-C03:04;HLA-C08:01;HLA-C12:02;HLA-C12:03;HLA-C17:01	0.452781287	0.439422165	0.541231305	False
surface glycoprotein	56	64	LPFFSNVTW	HLA-B07:02;HLA-B35:01;HLA-B35:03;HLA-B42:01;HLA-B51:01;HLA-B53:01;HLA-B54:01;HLA-B55:01;HLA-B57:01;HLA-B81:01	0.512060184	0.533401714	0.38609641	False
ORF7a protein	108	116	VFITLCFTL	HLA-A23:01;HLA-A24:02;HLA-C04:01;HLA-C08:01;HLA-C14:02;HLA-C14:03	0.445419498	0.373676526	0.597961951	False
orf1a polyprotein;orf1ab polyprotein	15	23	QLSLPVLQV	HLA-A02:01;HLA-A02:03;HLA-A02:04;HLA-A02:07;HLA-B13:02;HLA-B15:09;HLA-C15:02	0.480163358	0.547618677	0.40629957	False
orf1ab polyprotein	6427	6436	ISAGFSLWVY	HLA-A01:01;HLA-A30:02;HLA-A36:01;HLA-B15:01;HLA-B46:01;HLA-B57:01;HLA-B57:03;HLA-B58:01;HLA-C02:02;HLA-C12:02	0.48003551	0.517049036	0.444909654	False
surface glycoprotein	424	433	KLPDDFTGCV	HLA-A02:01;HLA-A02:07;HLA-C01:02	0.470869101	0.532977713	0.442867671	False
orf1a polyprotein;orf1ab polyprotein	1620	1629	VLPNDDTLRV	HLA-A02:01;HLA-A02:07;HLA-C01:02	0.470869101	0.532977713	0.442867671	False
ORF7b	12	20	CFLAFLLFL	HLA-A23:01;HLA-A24:02;HLA-C04:01;HLA-C14:02;HLA-C14:03;HLA-C15:02	0.458995843	0.3997165	0.566140101	False
ORF3a protein	78	86	HFVCNLLLL	HLA-A23:01;HLA-A24:02;HLA-C04:01;HLA-C14:02;HLA-C14:03;HLA-C15:02	0.458995843	0.3997165	0.566140101	False
orf1a polyprotein;orf1ab polyprotein	2153	2161	TTNIVTRCL	HLA-B58:02;HLA-C03:03;HLA-C06:02;HLA-C07:01;HLA-C15:02	0.504573233	0.554857549	0.36639992	False
orf1a polyprotein;orf1ab polyprotein	438	446	VVGEGSEGL	HLA-A02:01;HLA-A32:01;HLA-B58:01;HLA-B81:01;HLA-C08:01	0.494210622	0.551865522	0.402357257	False
membrane glycoprotein	122	129	VPLHGTIL	HLA-B07:02;HLA-B08:01;HLA-B35:01;HLA-B42:01;HLA-B51:01;HLA-B81:01	0.531783244	0.600184064	0.276020243	False
orf1a polyprotein;orf1ab polyprotein	4163	4171	CTDDNALAY	HLA-A01:01;HLA-A25:01;HLA-A26:01;HLA-A29:02;HLA-A30:02;HLA-A32:01;HLA-A36:01;HLA-C02:02;HLA-C03:02;HLA-C08:02	0.536150299	0.575743731	0.299190009	False
orf1a polyprotein;orf1ab polyprotein	1313	1320	LAKALRKV	HLA-B08:01;HLA-B51:01;HLA-C02:02;HLA-C06:02;HLA-C12:02;HLA-C12:03	0.500090239	0.547158073	0.374935903	False
orf1ab polyprotein	6198	6205	DAIMTRCL	HLA-B08:01;HLA-B51:01;HLA-C03:03;HLA-C03:04;HLA-C12:03	0.47934182	0.543893069	0.403374237	False
orf1a polyprotein;orf1ab polyprotein	1952	1959	SRELKVTF	HLA-B38:01;HLA-B39:01;HLA-C07:01;HLA-C07:02	0.500174308	0.561821759	0.358526596	False
orf1a polyprotein;orf1ab polyprotein	2229	2236	IIIWFLLL	HLA-B51:01;HLA-B52:01;HLA-C03:02;HLA-C03:03;HLA-C03:04;HLA-C08:01;HLA-C15:02;HLA-C17:01	0.404690875	0.375204384	0.626343154	False
orf1a polyprotein;orf1ab polyprotein	1740	1748	NLDSCKRVL	HLA-A02:07;HLA-B08:01;HLA-B35:03;HLA-C04:01;HLA-C05:01;HLA-C08:02	0.533140912	0.568560957	0.307595903	False
orf1a polyprotein;orf1ab polyprotein	2773	2781	LIKVTLVFL	HLA-B08:01;HLA-B42:01;HLA-B81:01;HLA-C02:02;HLA-C03:02;HLA-C03:03;HLA-C04:01;HLA-C17:01	0.532818369	0.516783741	0.370601573	False
orf1a polyprotein;orf1ab polyprotein	3989	3997	SEFDRDAAM	HLA-B14:02;HLA-B18:01;HLA-B37:01;HLA-B40:01;HLA-B40:02;HLA-B41:01;HLA-B44:02;HLA-B44:03;HLA-B45:01;HLA-B49:01;HLA-B50:01	0.514586551	0.545980084	0.360063998	False
orf1ab polyprotein	4759	4766	SFKELLVY	HLA-A29:02;HLA-A30:02;HLA-B15:01;HLA-B46:01;HLA-C03:02;HLA-C07:02;HLA-C14:02;HLA-C14:03	0.427250432	0.439961757	0.558778013	False
membrane glycoprotein	198	206	RYRIGNYKL	HLA-A23:01;HLA-A24:02;HLA-A30:01;HLA-C07:02	0.450206109	0.436894547	0.538912284	False
orf1a polyprotein;orf1ab polyprotein	2114	2122	SRVLGLKTL	HLA-B14:02;HLA-B15:09;HLA-B27:05;HLA-B38:01;HLA-B39:01;HLA-C06:02;HLA-C07:02	0.482142017	0.530558656	0.410857923	False
orf1a polyprotein;orf1ab polyprotein	4131	4139	LRANSAVKL	HLA-B14:02;HLA-B15:09;HLA-B27:05;HLA-B38:01;HLA-B39:01;HLA-C06:02;HLA-C07:02	0.482142017	0.530558656	0.410857923	False
membrane glycoprotein	173	181	SRTLSYYKL	HLA-B14:02;HLA-B27:05;HLA-B38:01;HLA-B39:01;HLA-C06:02;HLA-C07:02	0.482042843	0.530558656	0.410857923	False
orf1ab polyprotein	4960	4968	NRQFHQKLL	HLA-B14:02;HLA-B27:05;HLA-B38:01;HLA-B39:01;HLA-C06:02;HLA-C07:02	0.482042843	0.530558656	0.410857923	False
orf1ab polyprotein	6328	6336	TRVLSNLNL	HLA-B14:02;HLA-B27:05;HLA-B38:01;HLA-B39:01;HLA-C06:02;HLA-C07:02	0.482042843	0.530558656	0.410857923	False
orf1ab polyprotein	5179	5186	YYQNNVFM	HLA-C04:01;HLA-C07:02;HLA-C14:02;HLA-C14:03	0.471671182	0.462754979	0.49319839	False
orf1a polyprotein;orf1ab polyprotein	3648	3655	AYFNMVYM	HLA-C04:01;HLA-C07:02;HLA-C14:02;HLA-C14:03	0.471671182	0.462754979	0.49319839	False
orf1ab polyprotein	4912	4919	SYEDQDAL	HLA-C04:01;HLA-C07:02;HLA-C14:02;HLA-C14:03	0.471671182	0.462754979	0.49319839	False
orf1ab polyprotein	4986	4993	FYGGWHNM	HLA-C04:01;HLA-C07:02;HLA-C14:02;HLA-C14:03	0.471671182	0.462754979	0.49319839	False
orf1ab polyprotein	4557	4564	FVENPDIL	HLA-C03:03;HLA-C04:01;HLA-C05:01;HLA-C08:01;HLA-C08:02;HLA-C17:01	0.519356755	0.505439438	0.398770348	False
orf1a polyprotein;orf1ab polyprotein	3048	3056	VAGGIVAIV	HLA-A68:02;HLA-B51:01;HLA-C02:02;HLA-C06:02;HLA-C08:01;HLA-C12:02;HLA-C12:03;HLA-C15:02	0.454489879	0.436971842	0.533326951	False
orf1a polyprotein;orf1ab polyprotein	693	700	IIIGGAKL	HLA-C02:02;HLA-C03:02;HLA-C03:03;HLA-C03:04;HLA-C05:01;HLA-C08:01;HLA-C17:01	0.467162107	0.472284926	0.4871435	False
orf1ab polyprotein	5251	5259	FVSLAIDAY	HLA-A01:01;HLA-A29:02;HLA-A30:02;HLA-A36:01;HLA-B15:01;HLA-B35:01;HLA-C02:02;HLA-C03:02	0.522273816	0.561472529	0.325935344	False
ORF6 protein	11	19	IAEILLIIM	HLA-B35:01;HLA-B35:03;HLA-B51:01;HLA-C05:01;HLA-C08:01;HLA-C08:02;HLA-C12:02;HLA-C12:03	0.467389676	0.487855918	0.471152235	False
orf1a polyprotein;orf1ab polyprotein	536	543	FASEAARV	HLA-B51:01;HLA-B54:01;HLA-C02:02;HLA-C05:01;HLA-C06:02;HLA-C12:02;HLA-C12:03	0.490648991	0.527536829	0.408854698	False
orf1a polyprotein;orf1ab polyprotein	2390	2398	FYYVWKSYV	HLA-B51:01;HLA-C04:01;HLA-C06:02;HLA-C12:02;HLA-C14:02;HLA-C14:03	0.469042468	0.444668165	0.509293357	False
orf1a polyprotein;orf1ab polyprotein	2849	2857	KACPLIAAV	HLA-A02:03;HLA-A02:07;HLA-A68:02;HLA-B54:01;HLA-B55:01;HLA-C02:02;HLA-C06:02;HLA-C08:01;HLA-C12:02;HLA-C12:03;HLA-C15:02	0.425979809	0.403274767	0.579812649	False
surface glycoprotein	869	877	MIAQYTSAL	HLA-A02:03;HLA-A25:01;HLA-B15:09;HLA-C01:02;HLA-C03:02;HLA-C03:03;HLA-C03:04;HLA-C08:01;HLA-C17:01	0.37259375	0.343945355	0.668605186	False
orf1a polyprotein;orf1ab polyprotein	2330	2337	AYILFTRF	HLA-A23:01;HLA-A24:02;HLA-A29:02;HLA-B15:03;HLA-C04:01;HLA-C14:02;HLA-C14:03	0.485315226	0.419620223	0.513121639	False
orf1ab polyprotein	5501	5509	NRNYVFTGY	HLA-B27:05;HLA-C07:01;HLA-C07:02	0.49814628	0.562915763	0.346268333	False
orf1ab polyprotein	4904	4913	ARLYYDSMSY	HLA-B27:05;HLA-C07:01;HLA-C07:02	0.49814628	0.562915763	0.346268333	False
orf1a polyprotein;orf1ab polyprotein	2949	2957	RPDTRYVLM	HLA-A36:01;HLA-B07:02;HLA-B35:03;HLA-B37:01;HLA-B42:01;HLA-B53:01;HLA-B81:01;HLA-C04:01;HLA-C05:01	0.551465332	0.557876328	0.277491887	False
orf1a polyprotein;orf1ab polyprotein	1561	1570	SLREVRTIKV	HLA-A02:01;HLA-A02:03;HLA-A02:04;HLA-A02:07;HLA-A30:01;HLA-B13:02	0.489619297	0.548023658	0.374870642	False
surface glycoprotein	1000	1008	RLQSLQTYV	HLA-A02:01;HLA-A02:03;HLA-A02:04;HLA-A02:07;HLA-A30:01;HLA-B13:02	0.489619297	0.548023658	0.374870642	False
orf1a polyprotein;orf1ab polyprotein	2336	2343	RFFYVLGL	HLA-B37:01;HLA-B52:01;HLA-C04:01;HLA-C07:01;HLA-C14:02;HLA-C14:03	0.510844164	0.510109896	0.39719658	False
orf1a polyprotein;orf1ab polyprotein	615	623	NIFGTVYEK	HLA-A03:01;HLA-A11:01;HLA-A30:01;HLA-A33:03;HLA-A68:01	0.424762699	0.421883084	0.56241775	False
surface glycoprotein	725	733	EILPVSMTK	HLA-A03:01;HLA-A11:01;HLA-A30:01;HLA-A33:03;HLA-A68:01	0.424762699	0.421883084	0.56241775	False
orf1a polyprotein;orf1ab polyprotein	750	759	EVLTEEVVLK	HLA-A03:01;HLA-A11:01;HLA-A30:01;HLA-A33:03;HLA-A68:01	0.424762699	0.421883084	0.56241775	False
orf1a polyprotein;orf1ab polyprotein	2133	2141	VPWDTIANY	HLA-A29:02;HLA-A30:02;HLA-A36:01;HLA-B15:03;HLA-B35:01;HLA-B46:01;HLA-B51:01;HLA-B53:01;HLA-B55:01;HLA-C07:01	0.527982923	0.510871937	0.371058659	False
orf1a polyprotein;orf1ab polyprotein	1923	1931	ASFDNFKFV	HLA-A02:03;HLA-A30:01;HLA-A68:02;HLA-B13:02;HLA-B49:01;HLA-B52:01;HLA-C02:02;HLA-C06:02;HLA-C12:02;HLA-C12:03;HLA-C15:02	0.475748309	0.4566094	0.482101068	False
orf1ab polyprotein	4659	4667	KWDLLKYDF	HLA-A24:02;HLA-B37:01;HLA-B57:03;HLA-C04:01;HLA-C05:01	0.48287556	0.476677904	0.461599052	False
orf1a polyprotein;orf1ab polyprotein	3798	3806	CLLNRYFRL	HLA-A02:01;HLA-A02:04;HLA-B08:01	0.526503661	0.620803895	0.206899221	False
ORF8 protein	111	118	YHDVRVVL	HLA-B14:02;HLA-B15:09;HLA-B38:01;HLA-B39:01;HLA-C03:03;HLA-C04:01;HLA-C05:01;HLA-C08:02	0.535842639	0.556760366	0.293714535	False
orf1ab polyprotein	4433	4441	KVAGFAKFL	HLA-A30:01;HLA-A32:01;HLA-A68:02;HLA-B42:01;HLA-B48:01;HLA-B57:03;HLA-B58:02;HLA-B81:01;HLA-C02:02;HLA-C03:03;HLA-C06:02;HLA-C12:02;HLA-C15:02;HLA-C17:01	0.504509987	0.454858522	0.449381635	False
ORF7b	22	30	LIMLIIFWF	HLA-A24:02;HLA-A29:02;HLA-B15:01;HLA-B57:01;HLA-C02:02;HLA-C03:03	0.456420673	0.487848704	0.468306296	False
orf1ab polyprotein	5179	5187	YYQNNVFMS	HLA-A24:02;HLA-C07:02;HLA-C14:02;HLA-C14:03	0.400975062	0.414018334	0.580036885	False
orf1a polyprotein;orf1ab polyprotein	3718	3727	VYKVYYGNAL	HLA-A24:02;HLA-C07:02;HLA-C14:02;HLA-C14:03	0.400975062	0.414018334	0.580036885	False
orf1a polyprotein;orf1ab polyprotein	1365	1373	QEILGTVSW	HLA-B18:01;HLA-B40:01;HLA-B40:02;HLA-B41:01;HLA-B44:02;HLA-B44:03;HLA-B45:01;HLA-B49:01;HLA-B50:01;HLA-B57:01	0.496811767	0.537722392	0.36775238	False
orf1ab polyprotein	5283	5291	LHDELTGHM	HLA-A01:01;HLA-A02:07;HLA-B15:09;HLA-C04:01;HLA-C05:01	0.511471385	0.557395833	0.319896797	False
orf1ab polyprotein	5457	5465	FAAETLKAT	HLA-B35:03;HLA-B46:01;HLA-C02:02;HLA-C03:02;HLA-C03:03;HLA-C03:04;HLA-C12:02;HLA-C12:03	0.420382714	0.431041769	0.549549783	False
nucleocapsid phosphoprotein	306	314	QFAPSASAF	HLA-A23:01;HLA-A24:02;HLA-A29:02;HLA-B15:09;HLA-C04:01;HLA-C14:02;HLA-C14:03	0.473152699	0.418585766	0.512848872	False
surface glycoprotein	489	497	YFPLQSYGF	HLA-A23:01;HLA-A24:02;HLA-A29:02;HLA-C04:01;HLA-C14:02;HLA-C14:03	0.473059962	0.418585766	0.512848872	False
orf1a polyprotein;orf1ab polyprotein	3606	3614	LYENAFLPF	HLA-A23:01;HLA-A24:02;HLA-A29:02;HLA-C04:01;HLA-C14:02;HLA-C14:03	0.473059962	0.418585766	0.512848872	False
orf1a polyprotein;orf1ab polyprotein	2826	2834	CFANKHADF	HLA-A23:01;HLA-A24:02;HLA-A29:02;HLA-C04:01;HLA-C14:02;HLA-C14:03	0.473059962	0.418585766	0.512848872	False
orf1a polyprotein;orf1ab polyprotein	4171	4180	YYNTTKGGRF	HLA-A23:01;HLA-A24:02;HLA-A29:02;HLA-C04:01;HLA-C14:02;HLA-C14:03	0.473059962	0.418585766	0.512848872	False
orf1ab polyprotein	6107	6115	VFVLWAHGF	HLA-A23:01;HLA-A24:02;HLA-A29:02;HLA-C04:01;HLA-C14:02;HLA-C14:03	0.473059962	0.418585766	0.512848872	False
orf1a polyprotein;orf1ab polyprotein	479	487	SFSASTSAF	HLA-A23:01;HLA-A24:02;HLA-A29:02;HLA-C04:01;HLA-C14:02;HLA-C14:03	0.473059962	0.418585766	0.512848872	False
surface glycoprotein	816	823	SFIEDLLF	HLA-A23:01;HLA-A24:02;HLA-A29:02;HLA-C04:01;HLA-C14:02;HLA-C14:03	0.473059962	0.418585766	0.512848872	False
ORF7b	12	19	CFLAFLLF	HLA-A23:01;HLA-A24:02;HLA-A29:02;HLA-C04:01;HLA-C14:02;HLA-C14:03	0.473059962	0.418585766	0.512848872	False
surface glycoprotein	167	175	TFEYVSQPF	HLA-A23:01;HLA-A24:02;HLA-A29:02;HLA-C04:01;HLA-C14:02;HLA-C14:03	0.473059962	0.418585766	0.512848872	False
ORF3a protein	51	59	ALLAVFQSA	HLA-A02:01;HLA-A02:03;HLA-A02:04;HLA-A02:07;HLA-B13:02;HLA-B50:01;HLA-B55:01	0.482515127	0.554450596	0.359666577	False
orf1a polyprotein;orf1ab polyprotein	1566	1574	RTIKVFTTV	HLA-A02:03;HLA-A23:01;HLA-A26:01;HLA-A30:01;HLA-A31:01;HLA-A32:01;HLA-A68:02;HLA-B13:02;HLA-B40:02;HLA-B49:01;HLA-B52:01;HLA-B57:03;HLA-B58:01;HLA-C02:02;HLA-C15:02	0.4828447	0.399912795	0.519818251	False
surface glycoprotein	1138	1145	YDPLQPEL	HLA-B37:01;HLA-C01:02;HLA-C03:02;HLA-C07:02;HLA-C08:01	0.355056429	0.346868725	0.668484396	False
surface glycoprotein	1054	1063	QSAPHGVVFL	HLA-A68:02;HLA-B57:03;HLA-B58:02;HLA-C03:04;HLA-C06:02;HLA-C12:02;HLA-C12:03;HLA-C15:02;HLA-C17:01	0.475380829	0.46013259	0.470312749	False
orf1a polyprotein;orf1ab polyprotein	2383	2390	MYIFFASF	HLA-A23:01;HLA-A24:02;HLA-C03:02;HLA-C04:01;HLA-C14:02;HLA-C14:03	0.441573145	0.375661095	0.573381446	False
nucleocapsid phosphoprotein	300	307	HWPQIAQF	HLA-A24:02;HLA-A26:01;HLA-B37:01;HLA-C04:01;HLA-C14:02	0.437697366	0.40725245	0.553121753	False
orf1a polyprotein;orf1ab polyprotein	1978	1986	SFKKGAKLL	HLA-A23:01;HLA-A24:02;HLA-A30:01;HLA-B42:01;HLA-C04:01;HLA-C14:02;HLA-C14:03	0.46942695	0.392195218	0.535560306	False
orf1ab polyprotein	6440	6448	DTYNLWNTF	HLA-A25:01;HLA-A26:01;HLA-A32:01;HLA-A68:01;HLA-B14:02;HLA-B18:01;HLA-B53:01;HLA-B57:01;HLA-B57:03;HLA-B58:01;HLA-C02:02;HLA-C12:02;HLA-C12:03	0.507387355	0.496958593	0.392865094	False
orf1a polyprotein;orf1ab polyprotein	1056	1064	VVVNAANVY	HLA-A25:01;HLA-A29:02;HLA-A30:02;HLA-A32:01;HLA-B15:01;HLA-B35:01;HLA-B57:01;HLA-B58:01;HLA-C02:02;HLA-C03:02;HLA-C12:02	0.476835974	0.481890376	0.447153674	False
ORF8 protein	108	116	FLEYHDVRV	HLA-A02:01;HLA-A02:04;HLA-A02:07;HLA-C05:01	0.507472099	0.59085272	0.270066018	False
orf1a polyprotein;orf1ab polyprotein	3715	3723	LTLVYKVYY	HLA-A01:01;HLA-A29:02;HLA-A30:02;HLA-A36:01;HLA-B57:01;HLA-C07:01	0.535971617	0.603011666	0.205195094	False
membrane glycoprotein	80	87	IAIAMACL	HLA-B51:01;HLA-C03:02;HLA-C03:03;HLA-C03:04;HLA-C08:01;HLA-C12:03;HLA-C17:01	0.416296392	0.407811828	0.568165385	False
surface glycoprotein	504	512	GYQPYRVVV	HLA-A30:01;HLA-B41:01;HLA-C06:02;HLA-C07:02;HLA-C14:02;HLA-C14:03	0.443880719	0.463373235	0.493876816	False
nucleocapsid phosphoprotein	374	382	KKADETQAL	HLA-A32:01;HLA-B13:02;HLA-B15:03;HLA-B48:01;HLA-C06:02;HLA-C07:02	0.463639744	0.491912358	0.445257641	False
surface glycoprotein	955	962	NAQALNTL	HLA-B08:01;HLA-B14:02;HLA-B51:01;HLA-C03:02;HLA-C03:03;HLA-C08:01;HLA-C12:03	0.444764926	0.489455144	0.477347061	False
orf1ab polyprotein	6694	6702	HSQLGGLHL	HLA-A36:01;HLA-B57:03;HLA-B58:02;HLA-C03:02;HLA-C03:03;HLA-C03:04;HLA-C05:01;HLA-C08:02;HLA-C15:02	0.467262744	0.491935759	0.440884892	False
surface glycoprotein	612	620	YQDVNCTEV	HLA-A02:07;HLA-B13:02;HLA-B15:09;HLA-B39:01;HLA-B52:01;HLA-C02:02;HLA-C04:01;HLA-C05:01;HLA-C08:02	0.524663703	0.518199145	0.359779351	False
orf1a polyprotein;orf1ab polyprotein	2887	2897	RVFSAVGNICY	HLA-A03:01;HLA-A11:01;HLA-A30:02;HLA-A32:01;HLA-A36:01;HLA-B57:01;HLA-B58:01	0.446281789	0.471709604	0.481258932	False
surface glycoprotein	1113	1121	QIITTDNTF	HLA-A23:01;HLA-A24:02;HLA-A25:01;HLA-A26:01;HLA-B15:01;HLA-B35:03;HLA-B38:01;HLA-B58:01	0.429995697	0.429273286	0.535031788	False
orf1a polyprotein;orf1ab polyprotein	1503	1511	ETISLAGSY	HLA-A01:01;HLA-A25:01;HLA-A26:01;HLA-A29:02;HLA-A30:02;HLA-A36:01;HLA-A68:01;HLA-A68:02;HLA-B44:02	0.540211484	0.589772856	0.222094132	False
orf1ab polyprotein	4941	4949	SAKNRARTV	HLA-A30:01;HLA-B08:01;HLA-B42:01;HLA-B46:01;HLA-C02:02;HLA-C06:02;HLA-C12:02;HLA-C12:03	0.485074897	0.50959584	0.398219562	False
envelope protein	20	29	FLAFVVFLLV	HLA-A02:01;HLA-A02:03;HLA-A02:04;HLA-A02:07;HLA-A29:02;HLA-A68:02	0.507567569	0.560802202	0.313836278	False
surface glycoprotein	1056	1063	APHGVVFL	HLA-B07:02;HLA-B08:01;HLA-B42:01;HLA-B81:01;HLA-C07:01	0.541708973	0.624888229	0.155113633	False
membrane glycoprotein	87	95	LVGLMWLSY	HLA-A01:01;HLA-A03:01;HLA-A29:02;HLA-A36:01;HLA-B46:01;HLA-C03:02	0.495028425	0.576305406	0.333129	False
orf1a polyprotein;orf1ab polyprotein	1380	1388	AHAEETRKL	HLA-A02:03;HLA-A02:04;HLA-A25:01;HLA-B13:02;HLA-B15:03;HLA-B15:09;HLA-B38:01;HLA-B39:01;HLA-B40:02;HLA-B44:02;HLA-B44:03;HLA-B48:01;HLA-B58:02;HLA-C06:02	0.489292262	0.504770669	0.397862408	False
surface glycoprotein	302	310	TLKSFTVEK	HLA-A03:01;HLA-A11:01;HLA-A30:01;HLA-A33:03;HLA-A74:01;HLA-B46:01	0.396523554	0.383288204	0.593594362	False
orf1a polyprotein;orf1ab polyprotein	4392	4400	QSADAQSFL	HLA-A68:02;HLA-B57:03;HLA-B58:02;HLA-C02:02;HLA-C03:03;HLA-C03:04;HLA-C12:02;HLA-C12:03;HLA-C15:02;HLA-C17:01	0.479118496	0.458456267	0.454184785	False
nucleocapsid phosphoprotein	79	86	SPDDQIGY	HLA-A01:01;HLA-A36:01;HLA-B35:01;HLA-B53:01;HLA-C07:01	0.528003523	0.57942968	0.238805819	False
orf1a polyprotein;orf1ab polyprotein	4219	4227	TPKGPKVKY	HLA-A29:02;HLA-A30:01;HLA-A30:02;HLA-B15:01;HLA-B35:01;HLA-B42:01;HLA-B53:01;HLA-B55:01;HLA-B81:01;HLA-C07:01	0.546835873	0.546101144	0.260606252	False
orf1ab polyprotein	5223	5231	YPDPSRILG	HLA-A01:01;HLA-B07:02;HLA-B35:01;HLA-B35:03;HLA-B53:01	0.514724667	0.578268438	0.260392193	False
ORF7a protein	89	97	RQEEVQELY	HLA-A01:01;HLA-A29:02;HLA-A30:02;HLA-A32:01;HLA-A36:01;HLA-B13:02;HLA-B15:01;HLA-B15:03;HLA-B48:01;HLA-B58:01	0.499093134	0.537580394	0.349040812	False
orf1a polyprotein;orf1ab polyprotein	1090	1099	YIATNGPLKV	HLA-A02:01;HLA-A02:03;HLA-A02:04;HLA-C02:02;HLA-C15:02	0.498901784	0.558295361	0.316144465	False
orf1a polyprotein;orf1ab polyprotein	808	816	VTNNTFTLK	HLA-A03:01;HLA-A11:01;HLA-A30:01;HLA-A31:01;HLA-A68:01;HLA-A74:01	0.454109263	0.45520839	0.47842716	False
orf1a polyprotein;orf1ab polyprotein	3255	3262	TSITSAVL	HLA-B58:01;HLA-B58:02;HLA-C03:03;HLA-C03:04;HLA-C07:01	0.477802142	0.519219033	0.392289844	False
orf1a polyprotein;orf1ab polyprotein	106	114	VLVPHVGEI	HLA-A02:01;HLA-A02:03;HLA-A02:04;HLA-A02:07;HLA-B53:01;HLA-C12:02;HLA-C17:01	0.487099429	0.523285307	0.374380443	False
orf1a polyprotein;orf1ab polyprotein	2246	2254	STAALGVLM	HLA-A11:01;HLA-A26:01;HLA-A29:02;HLA-A68:01;HLA-A68:02;HLA-A74:01;HLA-B57:01;HLA-B57:03;HLA-C02:02;HLA-C12:03	0.467007618	0.445347485	0.479356687	False
ORF3a protein	39	47	ASLPFGWLI	HLA-A11:01;HLA-A23:01;HLA-A32:01;HLA-B13:02;HLA-B52:01;HLA-B57:01;HLA-B57:03;HLA-B58:01;HLA-B58:02;HLA-C12:02;HLA-C15:02	0.395257289	0.358014395	0.604805624	False
orf1a polyprotein;orf1ab polyprotein	771	779	SEAVEAPLV	HLA-B13:02;HLA-B15:09;HLA-B18:01;HLA-B40:01;HLA-B40:02;HLA-B41:01;HLA-B44:02;HLA-B44:03;HLA-B45:01;HLA-B49:01;HLA-B50:01	0.487602114	0.521426596	0.37178524	False
orf1a polyprotein;orf1ab polyprotein	2949	2956	RPDTRYVL	HLA-B07:02;HLA-B35:03;HLA-B42:01;HLA-B81:01;HLA-C05:01;HLA-C07:01	0.533693964	0.607285125	0.18314856	False
ORF9b protein	5	12	ISEMHPAL	HLA-C03:02;HLA-C03:03;HLA-C03:04;HLA-C05:01;HLA-C08:01;HLA-C08:02	0.434332609	0.464688278	0.485121998	False
orf1a polyprotein;orf1ab polyprotein	2877	2885	TNGDFLHFL	HLA-A02:04;HLA-A68:02;HLA-B38:01;HLA-C06:02;HLA-C07:01;HLA-C12:02;HLA-C15:02	0.488394529	0.522464648	0.363983423	False
orf1a polyprotein;orf1ab polyprotein	3123	3131	LAHIQWMVM	HLA-B35:01;HLA-B35:03;HLA-B51:01;HLA-C03:02;HLA-C03:04;HLA-C12:02;HLA-C12:03	0.42122198	0.427406572	0.5297901	False
orf1a polyprotein;orf1ab polyprotein	2243	2250	LIYSTAAL	HLA-B46:01;HLA-C01:02;HLA-C03:02;HLA-C03:03;HLA-C03:04;HLA-C08:01	0.327596937	0.306877148	0.686647434	False
orf1ab polyprotein	5904	5912	DLYDKLQFT	HLA-A02:01;HLA-A02:03;HLA-A25:01;HLA-A26:01	0.490237515	0.570673647	0.303976882	False
orf1a polyprotein;orf1ab polyprotein	2338	2346	FYVLGLAAI	HLA-A24:02;HLA-B54:01;HLA-C03:02;HLA-C04:01;HLA-C14:02;HLA-C14:03	0.40352157	0.351980104	0.598709792	False
orf1a polyprotein;orf1ab polyprotein	1529	1536	KRGDKSVY	HLA-A30:02;HLA-C07:01;HLA-C07:02	0.492275559	0.541581287	0.335769552	False
orf1a polyprotein;orf1ab polyprotein	3599	3607	QWSLFFFLY	HLA-A01:01;HLA-A29:02;HLA-A30:02;HLA-A36:01;HLA-B18:01;HLA-B44:02;HLA-B44:03	0.528236554	0.590455054	0.210059291	False
orf1a polyprotein;orf1ab polyprotein	2071	2079	VVGDIILKP	HLA-A03:01;HLA-A11:01;HLA-A26:01;HLA-A29:02;HLA-B13:02	0.438282897	0.483999841	0.456592693	False
orf1a polyprotein;orf1ab polyprotein	2303	2311	SLETIQITI	HLA-A02:01;HLA-A02:07;HLA-B13:02;HLA-C08:02	0.494301282	0.565995618	0.29717784	False
orf1a polyprotein;orf1ab polyprotein	3879	3887	LRVESSSKL	HLA-B14:02;HLA-B15:09;HLA-B27:05;HLA-B39:01;HLA-C06:02;HLA-C07:02	0.462233258	0.507674688	0.405356861	False
orf1ab polyprotein	4756	4763	SRLSFKEL	HLA-B14:02;HLA-B27:05;HLA-B39:01;HLA-C06:02;HLA-C07:02	0.462132196	0.507674688	0.405356861	False
orf1a polyprotein;orf1ab polyprotein	4178	4185	GRFVLALL	HLA-B14:02;HLA-B27:05;HLA-B39:01;HLA-C06:02;HLA-C07:02	0.462132196	0.507674688	0.405356861	False
orf1a polyprotein;orf1ab polyprotein	480	487	FSASTSAF	HLA-B46:01;HLA-B58:01;HLA-C02:02;HLA-C03:02;HLA-C03:03;HLA-C03:04;HLA-C12:03;HLA-C17:01	0.430057461	0.414276141	0.531130277	False
orf1ab polyprotein	6908	6916	TLIGDCATV	HLA-A02:01;HLA-A02:03;HLA-A02:04;HLA-A02:07;HLA-A68:02;HLA-B13:02	0.48347915	0.541507537	0.34307424	False
orf1a polyprotein;orf1ab polyprotein	612	620	WLTNIFGTV	HLA-A02:01;HLA-A02:03;HLA-A02:04;HLA-A02:07;HLA-A68:02;HLA-B13:02	0.48347915	0.541507537	0.34307424	False
surface glycoprotein	755	763	QYGSFCTQL	HLA-A23:01;HLA-A24:02;HLA-C07:02;HLA-C14:03	0.422642062	0.419836413	0.530271863	False
orf1ab polyprotein	4997	5006	VYSDVENPHL	HLA-A23:01;HLA-A24:02;HLA-C07:02;HLA-C14:03	0.422642062	0.419836413	0.530271863	False
orf1ab polyprotein	4757	4765	RLSFKELLV	HLA-A02:01;HLA-A02:03;HLA-A02:04;HLA-A36:01;HLA-B13:02;HLA-C15:02	0.481114772	0.547695789	0.342049228	False
orf1ab polyprotein	6857	6865	LAVPYNMRV	HLA-B35:03;HLA-B51:01;HLA-B54:01;HLA-C02:02;HLA-C03:04;HLA-C12:02;HLA-C12:03;HLA-C15:02	0.426955754	0.430565783	0.515572449	False
surface glycoprotein	268	275	GYLQPRTF	HLA-A23:01;HLA-A24:02;HLA-B58:02;HLA-C07:01;HLA-C14:02;HLA-C14:03	0.45986599	0.457529182	0.462387502	False
orf1a polyprotein;orf1ab polyprotein	2875	2884	RTTNGDFLHF	HLA-A23:01;HLA-A24:02;HLA-A25:01;HLA-A29:02;HLA-A32:01;HLA-A36:01;HLA-B57:01;HLA-B57:03;HLA-B58:01;HLA-C15:02	0.444530214	0.4175741	0.508553824	False
orf1ab polyprotein	4977	4985	ATVVIGTSK	HLA-A03:01;HLA-A11:01;HLA-A30:01;HLA-A31:01;HLA-A68:01	0.441652872	0.455119814	0.476793711	False
orf1a polyprotein;orf1ab polyprotein	4283	4291	YLASGGQPI	HLA-A02:01;HLA-A02:03;HLA-B13:02;HLA-B46:01;HLA-B53:01	0.478858389	0.533420201	0.360994087	False
orf1a polyprotein;orf1ab polyprotein	2096	2105	MAAYVDNSSL	HLA-A68:02;HLA-B35:01;HLA-B35:03;HLA-C03:03;HLA-C03:04;HLA-C08:01;HLA-C12:03	0.434116789	0.439491215	0.498532584	False
ORF3a protein	107	114	YLYALVYF	HLA-A29:02;HLA-B15:01;HLA-B15:03;HLA-B46:01;HLA-C02:02;HLA-C03:02;HLA-C04:01;HLA-C12:02;HLA-C17:01	0.482767832	0.42606911	0.462069488	False
orf1a polyprotein;orf1ab polyprotein	3370	3378	QPGQTFSVL	HLA-B07:02;HLA-B35:01;HLA-B35:03;HLA-B42:01;HLA-B81:01;HLA-C07:01	0.518745201	0.56938856	0.241762371	False
orf1a polyprotein;orf1ab polyprotein	3601	3609	SLFFFLYEN	HLA-A02:01;HLA-A02:03;HLA-A02:04;HLA-A29:02;HLA-B13:02	0.499462007	0.57303673	0.273839437	False
orf1a polyprotein;orf1ab polyprotein	389	397	NESGLKTIL	HLA-B14:02;HLA-B18:01;HLA-B39:01;HLA-B40:01;HLA-B40:02;HLA-B44:02;HLA-B44:03;HLA-B45:01;HLA-B49:01	0.491200043	0.524493215	0.34367318	False
orf1a polyprotein;orf1ab polyprotein	2962	2969	IQFPNTYL	HLA-B14:02;HLA-B15:01;HLA-B15:03;HLA-B15:09;HLA-B39:01;HLA-B48:01;HLA-B52:01;HLA-C02:02;HLA-C06:02;HLA-C08:02;HLA-C12:02;HLA-C17:01	0.498453012	0.483382939	0.381085701	False
orf1ab polyprotein	5386	5395	QLYLGGMSYY	HLA-A01:01;HLA-A03:01;HLA-A30:02;HLA-A36:01;HLA-B15:01	0.515547366	0.602462743	0.206935338	False
orf1a polyprotein;orf1ab polyprotein	1236	1243	VEEVTTTL	HLA-B14:02;HLA-B18:01;HLA-B37:01;HLA-B40:01;HLA-B40:02;HLA-B49:01;HLA-B52:01;HLA-C04:01	0.478941025	0.461760554	0.425798867	False
orf1a polyprotein;orf1ab polyprotein	3457	3465	AGTDTTITV	HLA-A02:01;HLA-B13:02;HLA-B52:01;HLA-C12:02	0.478112372	0.548078247	0.339155651	False
orf1ab polyprotein	5073	5081	SSGDATTAY	HLA-A01:01;HLA-A25:01;HLA-A30:02;HLA-A36:01;HLA-B15:01;HLA-B46:01;HLA-B58:01;HLA-C02:02;HLA-C03:02	0.45447515	0.490315627	0.43155767	False
nucleocapsid phosphoprotein	359	367	AYKTFPPTE	HLA-A24:02;HLA-A30:01;HLA-C07:02	0.408977683	0.41520865	0.5362862	False
orf1ab polyprotein	6441	6448	TYNLWNTF	HLA-A23:01;HLA-A24:02;HLA-B37:01;HLA-C04:01;HLA-C14:02;HLA-C14:03	0.444048071	0.390353194	0.525435539	False
orf1ab polyprotein	5744	5752	EYFNSVCRL	HLA-A23:01;HLA-A24:02;HLA-A25:01;HLA-A68:02;HLA-B38:01;HLA-C06:02;HLA-C14:02;HLA-C14:03	0.442373754	0.42125088	0.498918644	False
ORF7b	15	22	AFLLFLVL	HLA-A23:01;HLA-B08:01;HLA-C03:02;HLA-C04:01;HLA-C08:01;HLA-C14:02;HLA-C14:03	0.452971122	0.425260837	0.499045249	False
orf1ab polyprotein	4814	4822	FAVSKGFFK	HLA-A11:01;HLA-A68:01;HLA-C02:02;HLA-C03:03;HLA-C03:04	0.41730448	0.42435441	0.521285081	False
orf1a polyprotein;orf1ab polyprotein	4073	4081	VIPDYNTYK	HLA-A02:07;HLA-A03:01;HLA-A11:01;HLA-C01:02	0.37109219	0.396689286	0.576464176	False
orf1a polyprotein;orf1ab polyprotein	2534	2543	GSLPINVIVF	HLA-A32:01;HLA-B15:01;HLA-B15:03;HLA-B48:01;HLA-B57:01;HLA-B57:03;HLA-B58:01;HLA-B58:02;HLA-C07:01;HLA-C12:02	0.475408812	0.496775575	0.386478261	False
orf1a polyprotein;orf1ab polyprotein	3619	3627	IAMSAFAMM	HLA-B35:01;HLA-C02:02;HLA-C03:02;HLA-C03:03;HLA-C03:04;HLA-C12:03	0.450811776	0.465201187	0.444625249	False
orf1a polyprotein;orf1ab polyprotein	258	266	KLAKKFDTF	HLA-A23:01;HLA-A24:02;HLA-A25:01;HLA-A29:02;HLA-A32:01;HLA-B15:01;HLA-B15:03;HLA-B57:03;HLA-B58:01	0.455865596	0.431433901	0.472745563	False
orf1a polyprotein;orf1ab polyprotein	3821	3829	RYMNSQGLL	HLA-A23:01;HLA-A24:02;HLA-A30:02;HLA-C04:01;HLA-C14:02;HLA-C14:03	0.455822702	0.386398682	0.511830887	False
orf1a polyprotein;orf1ab polyprotein	1321	1329	PTDNYITTY	HLA-A01:01;HLA-A25:01;HLA-A26:01;HLA-A29:02;HLA-A30:02;HLA-A32:01;HLA-A36:01;HLA-B57:03;HLA-B58:01;HLA-C02:02	0.508700025	0.542579961	0.294857159	False
orf1a polyprotein;orf1ab polyprotein	3287	3295	TTTLNGLWL	HLA-A01:01;HLA-B58:02;HLA-C03:03;HLA-C03:04;HLA-C15:02	0.448346081	0.510692371	0.399234103	False
orf1ab polyprotein	4680	4688	KYWDQTYHP	HLA-A23:01;HLA-A24:02;HLA-C07:02	0.420682327	0.419658898	0.514687717	False
orf1a polyprotein;orf1ab polyprotein	3299	3307	VYCPRHVIC	HLA-A23:01;HLA-A24:02;HLA-C07:02	0.420682327	0.419658898	0.514687717	False
surface glycoprotein	203	212	IYSKHTPINL	HLA-A23:01;HLA-A24:02;HLA-C07:02	0.420682327	0.419658898	0.514687717	False
orf1ab polyprotein	6775	6783	DYTEISFML	HLA-A23:01;HLA-A24:02;HLA-C07:02	0.420682327	0.419658898	0.514687717	False
orf1a polyprotein;orf1ab polyprotein	4348	4356	KYVQIPTTC	HLA-A23:01;HLA-A24:02;HLA-C07:02	0.420682327	0.419658898	0.514687717	False
surface glycoprotein	969	977	NFGAISSVL	HLA-A23:01;HLA-A24:02;HLA-B15:09;HLA-B39:01;HLA-C04:01;HLA-C14:02;HLA-C14:03	0.44193481	0.385473859	0.524076316	False
surface glycoprotein	212	220	LVRDLPQGF	HLA-A25:01;HLA-A26:01;HLA-A29:02;HLA-A32:01;HLA-B15:01;HLA-B35:01;HLA-B46:01;HLA-B53:01;HLA-B57:01;HLA-B57:03;HLA-C02:02	0.48574872	0.492091223	0.373658607	False
orf1a polyprotein;orf1ab polyprotein	72	79	KRSDARTA	HLA-B58:02;HLA-C07:01;HLA-C07:02	0.479042971	0.533075146	0.335024988	False
surface glycoprotein	386	395	KLNDLCFTNV	HLA-A02:01;HLA-A02:03;HLA-A02:04;HLA-A02:07;HLA-A30:01;HLA-A74:01	0.479186609	0.52322356	0.34665111	False
orf1a polyprotein;orf1ab polyprotein	2297	2305	SLDTYPSLE	HLA-A01:01;HLA-A36:01;HLA-C04:01;HLA-C05:01	0.512236581	0.557459961	0.252567788	False
surface glycoprotein	723	731	TTEILPVSM	HLA-A01:01;HLA-A36:01;HLA-C04:01;HLA-C05:01	0.512236581	0.557459961	0.252567788	False
ORF7b	10	19	YLCFLAFLLF	HLA-A01:01;HLA-A24:02;HLA-A29:02	0.441144253	0.497971068	0.414178148	False
orf1ab polyprotein	5863	5871	SEYDYVIFT	HLA-B18:01;HLA-B40:01;HLA-B40:02;HLA-B41:01;HLA-B44:02;HLA-B44:03;HLA-B45:01;HLA-B49:01;HLA-B50:01;HLA-C12:02	0.468603013	0.493736825	0.392842354	False
membrane glycoprotein	199	206	YRIGNYKL	HLA-B14:02;HLA-B38:01;HLA-B39:01;HLA-C06:02;HLA-C07:02	0.45385144	0.496200428	0.400527044	False
membrane glycoprotein	162	170	KDLPKEITV	HLA-A02:01;HLA-A02:04;HLA-B37:01;HLA-B40:02;HLA-C15:02	0.480325088	0.544770445	0.325131241	False
orf1a polyprotein;orf1ab polyprotein	251	259	LQTPFEIKL	HLA-B13:02;HLA-B15:01;HLA-B15:09;HLA-B38:01;HLA-B39:01;HLA-B48:01;HLA-C02:02;HLA-C06:02;HLA-C12:02;HLA-C15:02;HLA-C17:01	0.456216909	0.465865126	0.430550509	False
orf1ab polyprotein	6755	6763	VEIIKSQDL	HLA-B14:02;HLA-B18:01;HLA-B37:01;HLA-B40:01;HLA-B40:02;HLA-B44:02;HLA-B44:03;HLA-B49:01	0.47753476	0.524051788	0.34229522	False
orf1ab polyprotein	6671	6679	DEFIERYKL	HLA-B14:02;HLA-B18:01;HLA-B37:01;HLA-B40:01;HLA-B40:02;HLA-B44:02;HLA-B44:03;HLA-B49:01	0.47753476	0.524051788	0.34229522	False
ORF8 protein	102	111	CSFYEDFLEY	HLA-A01:01;HLA-A29:02;HLA-A36:01;HLA-C03:02;HLA-C07:01	0.494880117	0.562164933	0.264897521	False
orf1a polyprotein;orf1ab polyprotein	3437	3444	GTDLEGNF	HLA-A01:01;HLA-C04:01;HLA-C05:01	0.508031169	0.557395833	0.252567788	False
orf1ab polyprotein	5572	5580	RITGLYPTL	HLA-A02:04;HLA-A02:07;HLA-A30:01;HLA-A32:01;HLA-B13:02;HLA-B42:01;HLA-B48:01;HLA-B58:01;HLA-B81:01;HLA-C03:03;HLA-C03:04;HLA-C15:02	0.407862052	0.389505102	0.542395886	False
orf1a polyprotein;orf1ab polyprotein	1296	1304	LTAVVIPTK	HLA-A03:01;HLA-A11:01;HLA-A30:01;HLA-A68:01;HLA-B57:01	0.434125974	0.46346894	0.452125911	False
orf1ab polyprotein	5305	5312	SRYWEPEF	HLA-B15:09;HLA-C07:01;HLA-C07:02	0.472516618	0.53301911	0.335024988	False
orf1a polyprotein;orf1ab polyprotein	1627	1634	LRVEAFEY	HLA-C07:01;HLA-C07:02	0.472423769	0.53301911	0.335024988	False
surface glycoprotein	814	821	KRSFIEDL	HLA-C07:01;HLA-C07:02	0.472423769	0.53301911	0.335024988	False
orf1ab polyprotein	5715	5722	LRAKHYVY	HLA-C07:01;HLA-C07:02	0.472423769	0.53301911	0.335024988	False
orf1ab polyprotein	5112	5119	VRNLQHRL	HLA-C07:01;HLA-C07:02	0.472423769	0.53301911	0.335024988	False
orf1ab polyprotein	5917	5924	PRRNVATL	HLA-C07:01;HLA-C07:02	0.472423769	0.53301911	0.335024988	False
nucleocapsid phosphoprotein	106	113	PRWYFYYL	HLA-C07:01;HLA-C07:02	0.472423769	0.53301911	0.335024988	False
orf1ab polyprotein	4465	4472	KRHTFSNY	HLA-C07:01;HLA-C07:02	0.472423769	0.53301911	0.335024988	False
membrane glycoprotein	197	204	SRYRIGNY	HLA-C07:01;HLA-C07:02	0.472423769	0.53301911	0.335024988	False
orf1a polyprotein;orf1ab polyprotein	2430	2437	VRRSFYVY	HLA-C07:01;HLA-C07:02	0.472423769	0.53301911	0.335024988	False
envelope protein	16	24	SVLLFLAFV	HLA-A02:01;HLA-A02:04;HLA-A02:07;HLA-A68:02;HLA-C15:02	0.479952646	0.534102893	0.329887705	False
orf1a polyprotein;orf1ab polyprotein	1656	1664	WKYPQVNGL	HLA-A02:03;HLA-B14:02;HLA-B15:03;HLA-B15:09;HLA-B48:01;HLA-C06:02;HLA-C07:02	0.445445791	0.463526791	0.441065569	False
orf1a polyprotein;orf1ab polyprotein	4356	4363	CANDPVGF	HLA-B46:01;HLA-B53:01;HLA-B58:01;HLA-C02:02;HLA-C03:02;HLA-C04:01;HLA-C12:02;HLA-C12:03	0.448296196	0.373817945	0.520400712	False
orf1a polyprotein;orf1ab polyprotein	4260	4269	VPANSTVLSF	HLA-A24:02;HLA-B07:02;HLA-B35:01;HLA-B42:01;HLA-B53:01;HLA-B81:01	0.468382876	0.466672358	0.422744403	False
orf1a polyprotein;orf1ab polyprotein	1468	1477	SLKVPATVSV	HLA-A02:01;HLA-A02:03;HLA-A30:01;HLA-B46:01	0.466374487	0.523140698	0.358330069	False
surface glycoprotein	162	170	SANNCTFEY	HLA-A29:02;HLA-A30:02;HLA-B15:01;HLA-B15:03;HLA-B35:01;HLA-B46:01;HLA-B53:01;HLA-C02:02;HLA-C03:02;HLA-C12:02;HLA-C12:03	0.470168484	0.430715887	0.445457182	False
nucleocapsid phosphoprotein	153	161	NNAAIVLQL	HLA-A02:03;HLA-A68:02;HLA-B15:09;HLA-B35:01;HLA-B38:01;HLA-B39:01;HLA-B44:03;HLA-C06:02;HLA-C12:02;HLA-C15:02	0.442379109	0.435621641	0.467531337	False
orf1a polyprotein;orf1ab polyprotein	468	477	KLNEEIAIIL	HLA-A02:01;HLA-A02:04;HLA-A02:07;HLA-A32:01;HLA-B48:01	0.476028749	0.548030245	0.308802986	False
orf1a polyprotein;orf1ab polyprotein	2320	2328	AFGLVAEWF	HLA-A24:02;HLA-A29:02;HLA-C04:01;HLA-C14:02;HLA-C14:03	0.433066607	0.395687393	0.510139885	False
orf1a polyprotein;orf1ab polyprotein	3796	3804	LFCLLNRYF	HLA-A24:02;HLA-A29:02;HLA-C04:01;HLA-C14:02;HLA-C14:03	0.433066607	0.395687393	0.510139885	False
orf1a polyprotein;orf1ab polyprotein	1728	1736	VRETMSYLF	HLA-A24:02;HLA-B38:01;HLA-C07:02	0.399947411	0.423623071	0.516404952	False
orf1a polyprotein;orf1ab polyprotein	3131	3138	MFTPLVPF	HLA-A24:02;HLA-C03:02;HLA-C04:01;HLA-C14:02;HLA-C14:03	0.400797391	0.351980104	0.571013181	False
orf1ab polyprotein	4806	4814	NFNKDFYDF	HLA-A23:01;HLA-A24:02;HLA-A29:02;HLA-B53:01;HLA-C04:01;HLA-C14:03	0.476519407	0.407203316	0.457743243	False
orf1ab polyprotein	4848	4856	YRYNLPTMC	HLA-B14:02;HLA-B27:05;HLA-C06:02;HLA-C07:02	0.451566118	0.497499758	0.389058133	False
orf1a polyprotein;orf1ab polyprotein	3322	3330	IRKSNHNFL	HLA-B14:02;HLA-B27:05;HLA-C06:02;HLA-C07:02	0.451566118	0.497499758	0.389058133	False
ORF3a protein	121	129	VRIIMRLWL	HLA-B14:02;HLA-B27:05;HLA-C06:02;HLA-C07:02	0.451566118	0.497499758	0.389058133	False
orf1a polyprotein;orf1ab polyprotein	2325	2333	AEWFLAYIL	HLA-B18:01;HLA-B37:01;HLA-B40:01;HLA-B40:02;HLA-B41:01;HLA-B44:02;HLA-B44:03;HLA-B45:01;HLA-B48:01;HLA-B49:01	0.467061222	0.492600218	0.378929914	False
orf1a polyprotein;orf1ab polyprotein	2489	2497	YIVDSVTVK	HLA-A03:01;HLA-A11:01;HLA-A68:01;HLA-C03:03	0.421292159	0.463027779	0.456225127	False
orf1ab polyprotein	5575	5582	GLYPTLNI	HLA-A02:01;HLA-A02:03;HLA-B13:02;HLA-B52:01	0.469182881	0.539516587	0.325333683	False
nucleocapsid phosphoprotein	115	123	TGPEAGLPY	HLA-A29:02;HLA-C01:02;HLA-C07:02;HLA-C14:02;HLA-C14:03	0.37930057	0.387599942	0.567139929	False
orf1a polyprotein;orf1ab polyprotein	2198	2206	IAKNTVKSV	HLA-A02:03;HLA-A30:01;HLA-B42:01;HLA-B46:01;HLA-B51:01;HLA-C02:02;HLA-C06:02;HLA-C12:02;HLA-C12:03	0.432864463	0.416027082	0.491728392	False
surface glycoprotein	680	687	SPRRARSV	HLA-B07:02;HLA-B08:01;HLA-B42:01;HLA-B51:01;HLA-B52:01;HLA-B55:01	0.485861053	0.561027498	0.273618802	False
orf1a polyprotein;orf1ab polyprotein	2915	2922	LAAECTIF	HLA-B35:01;HLA-B51:01;HLA-C02:02;HLA-C03:02;HLA-C03:03;HLA-C12:02;HLA-C12:03;HLA-C17:01	0.44176777	0.42935316	0.467614398	False
ORF8 protein	94	102	KLGSLVVRC	HLA-A02:01;HLA-A02:04;HLA-A32:01;HLA-A74:01;HLA-B13:02	0.500174474	0.571253658	0.242017612	False
orf1a polyprotein;orf1ab polyprotein	52	60	GLVEVEKGV	HLA-A02:01;HLA-A02:03;HLA-A02:04;HLA-A02:07;HLA-B13:02	0.457459414	0.530299082	0.34263081	False
orf1ab polyprotein	5849	5857	ILGLPTQTV	HLA-A02:01;HLA-A02:03;HLA-A02:04;HLA-A02:07;HLA-B13:02	0.457459414	0.530299082	0.34263081	False
orf1a polyprotein;orf1ab polyprotein	4242	4250	VLGSLAATV	HLA-A02:01;HLA-A02:03;HLA-A02:04;HLA-A02:07;HLA-B13:02	0.457459414	0.530299082	0.34263081	False
orf1ab polyprotein	4860	4868	QLLFVVEVV	HLA-A02:01;HLA-A02:03;HLA-A02:04;HLA-A02:07;HLA-B13:02	0.457459414	0.530299082	0.34263081	False
orf1a polyprotein;orf1ab polyprotein	4044	4052	ALNNIINNA	HLA-A02:01;HLA-A02:03;HLA-A02:04;HLA-A02:07;HLA-B13:02	0.457459414	0.530299082	0.34263081	False
orf1a polyprotein;orf1ab polyprotein	1437	1446	TLNDLNETLV	HLA-A02:01;HLA-A02:03;HLA-A02:04;HLA-A02:07;HLA-B13:02	0.457459414	0.530299082	0.34263081	False
orf1a polyprotein;orf1ab polyprotein	2348	2356	QLFFSYFAV	HLA-A02:01;HLA-A02:03;HLA-A02:04;HLA-A02:07;HLA-B13:02	0.457459414	0.530299082	0.34263081	False
ORF6 protein	34	42	NLIIKNLSK	HLA-A03:01;HLA-A11:01;HLA-B08:01	0.436820354	0.510145278	0.388486332	False
orf1ab polyprotein	6959	6967	LALGGSVAI	HLA-B35:01;HLA-B35:03;HLA-B51:01;HLA-B53:01;HLA-B54:01;HLA-C03:02;HLA-C03:04;HLA-C08:01	0.393956041	0.351893073	0.573830296	False
orf1a polyprotein;orf1ab polyprotein	2313	2321	SFKWDLTAF	HLA-A23:01;HLA-A24:02;HLA-A25:01;HLA-B15:01;HLA-B46:01;HLA-C02:02;HLA-C14:02;HLA-C14:03	0.408909931	0.393718622	0.526366974	False
orf1ab polyprotein	5514	5522	NSKVQIGEY	HLA-A01:01;HLA-A25:01;HLA-A30:02;HLA-A36:01;HLA-B15:01;HLA-B46:01;HLA-C02:02;HLA-C12:03	0.477732095	0.53472916	0.310640068	False
membrane glycoprotein	136	144	SELVIGAVI	HLA-B18:01;HLA-B40:01;HLA-B40:02;HLA-B41:01;HLA-B44:02;HLA-B44:03;HLA-B45:01;HLA-B49:01;HLA-B52:01	0.464809344	0.48634111	0.381622223	False
orf1ab polyprotein	4730	4738	VPFVVSTGY	HLA-A29:02;HLA-B15:01;HLA-B15:03;HLA-B35:01;HLA-B46:01;HLA-B53:01;HLA-B81:01;HLA-C07:01	0.498056305	0.505687541	0.319801286	False
orf1a polyprotein;orf1ab polyprotein	3206	3214	RYLALYNKY	HLA-A23:01;HLA-A24:02;HLA-A29:02;HLA-A30:01;HLA-A30:02;HLA-A32:01;HLA-B15:03;HLA-B27:05;HLA-C14:02;HLA-C14:03	0.458499639	0.401858664	0.474109827	False
ORF6 protein	14	22	ILLIIMRTF	HLA-A23:01;HLA-A24:02;HLA-A29:02;HLA-A32:01;HLA-B15:01;HLA-B15:03;HLA-B57:01;HLA-B57:03;HLA-B58:02	0.460935864	0.446671205	0.427988393	False
orf1ab polyprotein	4724	4732	KIFVDGVPF	HLA-A03:01;HLA-A32:01;HLA-B15:01;HLA-B46:01;HLA-B57:01;HLA-B57:03;HLA-B58:01;HLA-B81:01;HLA-C02:02	0.460641635	0.499957954	0.376559279	False
orf1a polyprotein;orf1ab polyprotein	1516	1523	YSGQSTQL	HLA-C03:03;HLA-C03:04;HLA-C07:01;HLA-C17:01	0.482105633	0.523858599	0.31788919	False
surface glycoprotein	1048	1056	HLMSFPQSA	HLA-A02:01;HLA-A02:03;HLA-B46:01;HLA-B50:01;HLA-B54:01	0.446046497	0.512406378	0.383328945	False
orf1a polyprotein;orf1ab polyprotein	3635	3644	FLCLFLLPSL	HLA-A02:01;HLA-A02:03;HLA-A02:04;HLA-A02:07;HLA-C03:02	0.44208912	0.505886296	0.38659644	False
orf1a polyprotein;orf1ab polyprotein	3134	3142	PLVPFWITI	HLA-A02:01;HLA-A02:03;HLA-A02:04;HLA-A02:07;HLA-C12:02	0.446224239	0.513654143	0.371461174	False
orf1a polyprotein;orf1ab polyprotein	255	263	FEIKLAKKF	HLA-B18:01;HLA-B40:01;HLA-B40:02;HLA-B44:02;HLA-B44:03;HLA-B49:01;HLA-B53:01;HLA-C02:02	0.492626614	0.504653737	0.323136114	False
orf1a polyprotein;orf1ab polyprotein	641	649	FLRDGWEIV	HLA-A02:01;HLA-A02:03;HLA-A02:04;HLA-A02:07;HLA-B46:01	0.43813373	0.504440318	0.392679111	False
orf1ab polyprotein	6504	6512	NVAFELWAK	HLA-A03:01;HLA-A11:01;HLA-A33:03;HLA-A68:01	0.389892726	0.401310938	0.534725948	False
orf1ab polyprotein	7067	7075	DMILSLLSK	HLA-A03:01;HLA-A11:01;HLA-A33:03;HLA-A68:01	0.389892726	0.401310938	0.534725948	False
orf1a polyprotein;orf1ab polyprotein	1397	1405	AIVSTIQRK	HLA-A03:01;HLA-A11:01;HLA-A30:01;HLA-A68:01;HLA-B13:02	0.426473796	0.450131116	0.45496414	False
orf1a polyprotein;orf1ab polyprotein	3971	3979	GDSEVVLKK	HLA-A03:01;HLA-A11:01;HLA-A30:01;HLA-A68:01;HLA-B13:02	0.426473796	0.450131116	0.45496414	False
orf1a polyprotein;orf1ab polyprotein	589	597	DLATNNLVV	HLA-A02:01;HLA-A02:03;HLA-A26:01	0.469698443	0.54507673	0.303042174	False
ORF10 protein	6	14	VFAFPFTIY	HLA-A24:02;HLA-A29:02;HLA-B15:01;HLA-B35:01;HLA-C14:02;HLA-C14:03	0.409139394	0.418586374	0.501001566	False
orf1ab polyprotein	5814	5823	RPQIGVVREF	HLA-B07:02;HLA-B35:01;HLA-B42:01;HLA-B53:01;HLA-B81:01;HLA-C07:01	0.525274173	0.555729788	0.202434897	False
orf1ab polyprotein	5306	5315	RYWEPEFYEA	HLA-A23:01;HLA-A24:02;HLA-A30:01;HLA-C07:01	0.461097202	0.4585716	0.41660584	False
orf1a polyprotein;orf1ab polyprotein	1123	1131	NKGEDIQLL	HLA-B15:03;HLA-B38:01;HLA-B39:01;HLA-B48:01;HLA-C06:02;HLA-C07:02	0.439536727	0.463948059	0.424145441	False
orf1ab polyprotein	4834	4842	FAQDGNAAI	HLA-A68:02;HLA-B35:03;HLA-B46:01;HLA-B53:01;HLA-B54:01;HLA-C03:02;HLA-C03:04;HLA-C08:01;HLA-C08:02;HLA-C12:03	0.395324948	0.350117115	0.564798109	False
orf1a polyprotein;orf1ab polyprotein	2772	2781	QLIKVTLVFL	HLA-A02:01;HLA-A02:03;HLA-A02:04;HLA-A02:07;HLA-A68:02;HLA-C17:01	0.479854207	0.522697333	0.313438548	False
ORF8 protein	92	100	EPKLGSLVV	HLA-B07:02;HLA-B08:01;HLA-B42:01;HLA-B45:01;HLA-B51:01;HLA-B54:01;HLA-B55:01	0.483937604	0.553922948	0.27070108	False
orf1a polyprotein;orf1ab polyprotein	3983	3991	SLNVAKSEF	HLA-A32:01;HLA-B15:01;HLA-B46:01;HLA-C01:02;HLA-C04:01;HLA-C14:03	0.407339603	0.387809522	0.52578385	False
surface glycoprotein	818	826	IEDLLFNKV	HLA-A02:07;HLA-B18:01;HLA-B37:01;HLA-B40:01;HLA-B40:02;HLA-B41:01;HLA-B45:01;HLA-B49:01;HLA-B50:01;HLA-C04:01	0.458540545	0.429158749	0.440138054	False
orf1ab polyprotein	6884	6892	RQWLPTGTL	HLA-A32:01;HLA-B07:02;HLA-B13:02;HLA-B15:01;HLA-B15:03;HLA-B37:01;HLA-B48:01;HLA-B52:01;HLA-B81:01;HLA-C08:02	0.475737667	0.52177986	0.313673515	False
surface glycoprotein	1060	1067	VVFLHVTY	HLA-A29:02;HLA-A36:01;HLA-B15:01;HLA-B15:03;HLA-B18:01;HLA-B35:01;HLA-B57:01;HLA-B58:01;HLA-C02:02;HLA-C03:02	0.46826786	0.465745053	0.390259855	False
orf1ab polyprotein	6964	6972	SVAIKITEH	HLA-A03:01;HLA-A11:01;HLA-A25:01;HLA-A26:01;HLA-B46:01	0.389897671	0.435428096	0.496833051	False
surface glycoprotein	1065	1073	VTYVPAQEK	HLA-A03:01;HLA-A11:01;HLA-A30:01;HLA-A68:01;HLA-B46:01	0.406044383	0.419858811	0.496460029	False
orf1ab polyprotein	5848	5857	KILGLPTQTV	HLA-A02:01;HLA-A02:04;HLA-A32:01;HLA-B13:02	0.488509198	0.571177158	0.240094436	False
orf1a polyprotein;orf1ab polyprotein	2354	2361	FAVHFISN	HLA-B54:01;HLA-C03:02;HLA-C03:03;HLA-C03:04;HLA-C08:01;HLA-C12:02;HLA-C12:03	0.351390283	0.35438775	0.595309395	False
surface glycoprotein	509	517	RVVVLSFEL	HLA-A32:01;HLA-A68:02;HLA-B48:01;HLA-B57:03;HLA-B58:01;HLA-B58:02;HLA-B81:01;HLA-C03:03;HLA-C07:01;HLA-C15:02	0.466361054	0.473044559	0.38743766	False
orf1a polyprotein;orf1ab polyprotein	3967	3975	AVANGDSEV	HLA-A02:01;HLA-A02:03;HLA-A68:02;HLA-B15:09;HLA-C02:02	0.500537681	0.55167008	0.242978898	False
membrane glycoprotein	27	35	LFLTWICLL	HLA-A02:04;HLA-A23:01;HLA-A24:02;HLA-C04:01;HLA-C14:02;HLA-C14:03	0.432138777	0.373591402	0.511159633	False
orf1ab polyprotein	6353	6361	TPAFDKSAF	HLA-B07:02;HLA-B08:01;HLA-B35:01;HLA-B35:03;HLA-B42:01;HLA-B53:01;HLA-B81:01	0.515744777	0.565877146	0.210052336	False
orf1ab polyprotein	5827	5835	NPAWRKAVF	HLA-B07:02;HLA-B08:01;HLA-B35:01;HLA-B35:03;HLA-B42:01;HLA-B53:01;HLA-B81:01	0.515744777	0.565877146	0.210052336	False
orf1a polyprotein;orf1ab polyprotein	1204	1211	AEIPKEEV	HLA-B08:01;HLA-B18:01;HLA-B37:01;HLA-B40:01;HLA-B40:02;HLA-B41:01;HLA-B45:01;HLA-B49:01;HLA-B50:01;HLA-B52:01	0.458286086	0.496396878	0.363243879	False
orf1ab polyprotein	7002	7010	AFLIGCNYL	HLA-A23:01;HLA-A24:02;HLA-C04:01;HLA-C14:02;HLA-C14:03	0.431473258	0.373591402	0.511159633	False
orf1a polyprotein;orf1ab polyprotein	3604	3612	FFLYENAFL	HLA-A23:01;HLA-A24:02;HLA-C04:01;HLA-C14:02;HLA-C14:03	0.431473258	0.373591402	0.511159633	False
surface glycoprotein	85	92	PFNDGVYF	HLA-A23:01;HLA-A24:02;HLA-C04:01;HLA-C14:02;HLA-C14:03	0.431473258	0.373591402	0.511159633	False
orf1a polyprotein;orf1ab polyprotein	3114	3123	FYLTNDVSFL	HLA-A23:01;HLA-A24:02;HLA-C04:01;HLA-C14:02;HLA-C14:03	0.431473258	0.373591402	0.511159633	False
orf1ab polyprotein	4725	4732	IFVDGVPF	HLA-A23:01;HLA-A24:02;HLA-C04:01;HLA-C14:02;HLA-C14:03	0.431473258	0.373591402	0.511159633	False
orf1a polyprotein;orf1ab polyprotein	1733	1741	SYLFQHANL	HLA-A23:01;HLA-A24:02;HLA-C04:01;HLA-C14:02;HLA-C14:03	0.431473258	0.373591402	0.511159633	False
ORF6 protein	21	29	TFKVSIWNL	HLA-A23:01;HLA-A24:02;HLA-C04:01;HLA-C14:02;HLA-C14:03	0.431473258	0.373591402	0.511159633	False
orf1a polyprotein;orf1ab polyprotein	3113	3122	TFYLTNDVSF	HLA-A23:01;HLA-A24:02;HLA-C04:01;HLA-C14:02;HLA-C14:03	0.431473258	0.373591402	0.511159633	False
membrane glycoprotein	111	120	SFNPETNILL	HLA-A23:01;HLA-A24:02;HLA-C04:01;HLA-C14:02;HLA-C14:03	0.431473258	0.373591402	0.511159633	False
orf1ab polyprotein	5272	5280	VFHLYLQYI	HLA-A23:01;HLA-A24:02;HLA-C04:01;HLA-C14:02;HLA-C14:03	0.431473258	0.373591402	0.511159633	False
orf1a polyprotein;orf1ab polyprotein	2327	2334	WFLAYILF	HLA-A23:01;HLA-A24:02;HLA-C04:01;HLA-C14:02;HLA-C14:03	0.431473258	0.373591402	0.511159633	False
orf1a polyprotein;orf1ab polyprotein	2300	2307	TYPSLETI	HLA-A23:01;HLA-A24:02;HLA-C04:01;HLA-C14:02;HLA-C14:03	0.431473258	0.373591402	0.511159633	False
orf1a polyprotein;orf1ab polyprotein	265	273	TFNGECPNF	HLA-A23:01;HLA-A24:02;HLA-C04:01;HLA-C14:02;HLA-C14:03	0.431473258	0.373591402	0.511159633	False
orf1a polyprotein;orf1ab polyprotein	3485	3493	RFTTTLNDF	HLA-A23:01;HLA-A24:02;HLA-C04:01;HLA-C14:02;HLA-C14:03	0.431473258	0.373591402	0.511159633	False
orf1a polyprotein;orf1ab polyprotein	616	624	IFGTVYEKL	HLA-A23:01;HLA-A24:02;HLA-C04:01;HLA-C14:02;HLA-C14:03	0.431473258	0.373591402	0.511159633	False
ORF3a protein	86	94	LFVTVYSHL	HLA-A23:01;HLA-A24:02;HLA-C04:01;HLA-C14:02;HLA-C14:03	0.431473258	0.373591402	0.511159633	False
orf1a polyprotein;orf1ab polyprotein	2601	2609	TFNVPMEKL	HLA-A23:01;HLA-A24:02;HLA-C04:01;HLA-C14:02;HLA-C14:03	0.431473258	0.373591402	0.511159633	False
orf1a polyprotein;orf1ab polyprotein	2781	2789	LFVAAIFYL	HLA-A23:01;HLA-A24:02;HLA-C04:01;HLA-C14:02;HLA-C14:03	0.431473258	0.373591402	0.511159633	False
orf1a polyprotein;orf1ab polyprotein	1845	1853	LYCIDGALL	HLA-A23:01;HLA-A24:02;HLA-C04:01;HLA-C14:02;HLA-C14:03	0.431473258	0.373591402	0.511159633	False
orf1a polyprotein;orf1ab polyprotein	3396	3404	NFTIKGSFL	HLA-A23:01;HLA-A24:02;HLA-C04:01;HLA-C14:02;HLA-C14:03	0.431473258	0.373591402	0.511159633	False
orf1ab polyprotein	4704	4713	NFNVLFSTVF	HLA-A23:01;HLA-A24:02;HLA-C04:01;HLA-C14:02;HLA-C14:03	0.431473258	0.373591402	0.511159633	False
orf1a polyprotein;orf1ab polyprotein	1247	1254	KFLTENLL	HLA-A23:01;HLA-A24:02;HLA-C04:01;HLA-C14:02;HLA-C14:03	0.431473258	0.373591402	0.511159633	False
orf1ab polyprotein	4474	4482	HEETIYNLL	HLA-B18:01;HLA-B38:01;HLA-B40:01;HLA-B40:02;HLA-B41:01;HLA-B44:02;HLA-B44:03;HLA-B48:01;HLA-B49:01	0.459585912	0.498381938	0.35916773	False
surface glycoprotein	814	822	KRSFIEDLL	HLA-B27:05;HLA-B38:01;HLA-C06:02;HLA-C07:02	0.437557944	0.487632616	0.393245691	False
membrane glycoprotein	15	22	KLLEQWNL	HLA-A02:01;HLA-A02:04;HLA-A02:07;HLA-A32:01;HLA-B58:02	0.476846607	0.547623173	0.279759231	False
orf1a polyprotein;orf1ab polyprotein	3158	3166	SNYLKRRVV	HLA-B08:01;HLA-B14:02;HLA-B49:01;HLA-B50:01;HLA-B52:01;HLA-C06:02;HLA-C12:02;HLA-C15:02	0.452792686	0.48961351	0.379824292	False
orf1a polyprotein;orf1ab polyprotein	3505	3513	LTQDHVDIL	HLA-C03:03;HLA-C03:04;HLA-C08:01;HLA-C12:02;HLA-C12:03;HLA-C15:02	0.369868256	0.381653678	0.55842646	False
orf1ab polyprotein	5526	5535	KGDYGDAVVY	HLA-A01:01;HLA-A30:02;HLA-A36:01;HLA-B15:03;HLA-B58:01;HLA-C07:01	0.495745042	0.539381096	0.26245697	False
orf1a polyprotein;orf1ab polyprotein	3585	3592	LTILTSLL	HLA-A01:01;HLA-C03:02;HLA-C03:03;HLA-C03:04	0.423756082	0.49055993	0.409154198	False
orf1ab polyprotein	5596	5604	VGMQKYSTL	HLA-A23:01;HLA-B08:01;HLA-B14:02;HLA-B48:01;HLA-C01:02;HLA-C03:04	0.438080581	0.457194494	0.435465968	False
membrane glycoprotein	15	24	KLLEQWNLVI	HLA-A02:01;HLA-A02:04;HLA-A23:01;HLA-A32:01	0.510866469	0.569939476	0.207597371	False
orf1a polyprotein;orf1ab polyprotein	1479	1486	SPDAVTAY	HLA-A01:01;HLA-B07:02;HLA-B35:01;HLA-B53:01	0.4972525	0.561288193	0.220607098	False
surface glycoprotein	4	11	FLVLLPLV	HLA-A02:01;HLA-A02:04;HLA-B51:01	0.47682614	0.548453554	0.279977296	False
orf1a polyprotein;orf1ab polyprotein	2972	2979	SVRVVTTF	HLA-B08:01;HLA-B15:01;HLA-B18:01;HLA-B46:01;HLA-B57:01;HLA-C02:02;HLA-C03:02	0.444652662	0.516075234	0.353969309	False
orf1a polyprotein;orf1ab polyprotein	2830	2838	KHADFDTWF	HLA-A23:01;HLA-A24:02;HLA-A32:01;HLA-B15:01;HLA-B15:03;HLA-B15:09;HLA-B38:01;HLA-B39:01;HLA-B57:03;HLA-B58:01	0.425415853	0.399059668	0.490769607	False
orf1a polyprotein;orf1ab polyprotein	3074	3083	YSHVVAFNTL	HLA-B57:03;HLA-C01:02;HLA-C03:02;HLA-C03:03;HLA-C03:04;HLA-C08:01	0.329930135	0.307320676	0.644521712	False
orf1ab polyprotein	5149	5157	ILSDDAVVC	HLA-A02:01;HLA-A02:04;HLA-B15:01	0.481783672	0.568195275	0.236278893	False
surface glycoprotein	193	201	VFKNIDGYF	HLA-A23:01;HLA-A24:02;HLA-A29:02;HLA-C04:01;HLA-C14:03	0.455199554	0.403343243	0.45682023	False
orf1a polyprotein;orf1ab polyprotein	1242	1249	TLEETKFL	HLA-B08:01;HLA-C04:01;HLA-C05:01;HLA-C08:02	0.515237556	0.552719785	0.204339391	False
orf1a polyprotein;orf1ab polyprotein	2301	2309	YPSLETIQI	HLA-B07:02;HLA-B35:01;HLA-B35:03;HLA-B38:01;HLA-B42:01;HLA-B51:01;HLA-B53:01;HLA-B54:01	0.473446823	0.486068728	0.350557426	False
orf1a polyprotein;orf1ab polyprotein	3795	3803	GLFCLLNRY	HLA-A02:03;HLA-A02:04;HLA-A03:01;HLA-A25:01;HLA-A26:01;HLA-A29:02;HLA-A30:02;HLA-A32:01;HLA-A36:01;HLA-B15:01;HLA-B15:03	0.496091823	0.530927422	0.265925606	False
ORF3a protein	101	108	LEAPFLYL	HLA-B14:02;HLA-B18:01;HLA-B37:01;HLA-B40:01;HLA-B40:02;HLA-B49:01;HLA-C03:02;HLA-C03:04;HLA-C17:01	0.431154823	0.430381112	0.453362842	False
orf1ab polyprotein	6371	6379	YYSDSPCES	HLA-A24:02;HLA-C07:02;HLA-C14:03	0.38048398	0.397830979	0.527664286	False
orf1a polyprotein;orf1ab polyprotein	2608	2616	KLKTLVATA	HLA-A02:01;HLA-A02:03;HLA-A30:01;HLA-B55:01	0.476382987	0.539487938	0.279878315	False
orf1ab polyprotein	6026	6034	VGTNLPLQL	HLA-B48:01;HLA-C03:04;HLA-C06:02;HLA-C08:01;HLA-C12:02;HLA-C15:02	0.372955458	0.365709423	0.560244099	False
orf1ab polyprotein	5557	5564	MPLSAPTL	HLA-B07:02;HLA-B14:02;HLA-B35:01;HLA-B35:03;HLA-B42:01;HLA-B51:01;HLA-B54:01;HLA-B81:01	0.466650853	0.49450744	0.345065882	False
membrane glycoprotein	48	56	IIKLIFLWL	HLA-A30:01;HLA-B08:01;HLA-B42:01;HLA-C02:02;HLA-C03:02;HLA-C03:03;HLA-C08:01;HLA-C15:02;HLA-C17:01	0.434288191	0.421466805	0.466153554	False
orf1a polyprotein;orf1ab polyprotein	3906	3915	EAFEKMVSLL	HLA-A25:01;HLA-A26:01;HLA-A68:02;HLA-B08:01;HLA-B35:01;HLA-B35:03;HLA-C12:02;HLA-C12:03;HLA-C17:01	0.468815245	0.500099321	0.33496933	False
orf1ab polyprotein	5905	5914	LYDKLQFTSL	HLA-A23:01;HLA-A24:02;HLA-C04:01;HLA-C08:02	0.460383432	0.411477605	0.442976939	False
orf1ab polyprotein	5079	5086	TAYANSVF	HLA-B35:01;HLA-B51:01;HLA-B58:01;HLA-C02:02;HLA-C03:02;HLA-C08:02;HLA-C12:02;HLA-C12:03	0.426337009	0.404736868	0.47804266	False
orf1a polyprotein;orf1ab polyprotein	871	879	FACVVADAV	HLA-B51:01;HLA-B54:01;HLA-C03:02;HLA-C03:04;HLA-C08:01;HLA-C08:02;HLA-C12:03	0.38233138	0.374309999	0.541322798	False
ORF8 protein	54	62	SAPLIELCV	HLA-B51:01;HLA-C01:02;HLA-C06:02;HLA-C12:02;HLA-C12:03	0.379982633	0.388051354	0.533436863	False
orf1a polyprotein;orf1ab polyprotein	3016	3024	GVFCGVDAV	HLA-A02:01;HLA-A02:03;HLA-A02:04;HLA-A68:02;HLA-B13:02	0.479285135	0.541507537	0.271957038	False
orf1a polyprotein;orf1ab polyprotein	1017	1025	TPVVQTIEV	HLA-B07:02;HLA-B35:01;HLA-B35:03;HLA-B42:01;HLA-B51:01;HLA-B53:01;HLA-B54:01;HLA-B55:01;HLA-B81:01	0.472184237	0.47958204	0.353294528	False
ORF6 protein	43	52	SLTENKYSQL	HLA-A02:01;HLA-A02:03;HLA-A02:04;HLA-A02:07;HLA-A25:01	0.454670596	0.531172216	0.31196293	False
orf1ab polyprotein	6578	6585	RVDGQVDL	HLA-B42:01;HLA-B58:01;HLA-B81:01;HLA-C04:01;HLA-C05:01;HLA-C08:01;HLA-C08:02;HLA-C17:01	0.482437461	0.431094498	0.39586155	False
orf1ab polyprotein	6063	6071	AKPPPGDQF	HLA-A24:02;HLA-B15:03;HLA-C07:02	0.392838395	0.398718442	0.512266874	False
membrane glycoprotein	45	52	FLYIIKLI	HLA-A02:03;HLA-B08:01;HLA-B13:02;HLA-B51:01;HLA-B52:01;HLA-C06:02	0.431057554	0.482337079	0.39279974	False
orf1ab polyprotein	6343	6351	SLYVNKHAF	HLA-A26:01;HLA-A29:02;HLA-A32:01;HLA-B08:01;HLA-B15:01;HLA-B15:03;HLA-B46:01;HLA-B53:01;HLA-C03:02;HLA-C14:03	0.447739738	0.470511956	0.391179306	False
orf1a polyprotein;orf1ab polyprotein	3197	3205	VLLPLTQYN	HLA-A02:01;HLA-A02:04;HLA-A02:07;HLA-A29:02	0.478385734	0.549530831	0.259969938	False
orf1a polyprotein;orf1ab polyprotein	3085	3093	FLMSFTVLC	HLA-A02:01;HLA-A02:04;HLA-A02:07;HLA-A29:02	0.478385734	0.549530831	0.259969938	False
surface glycoprotein	1225	1232	IAIVMVTI	HLA-B51:01;HLA-B52:01;HLA-C03:02;HLA-C03:04;HLA-C08:02;HLA-C12:02;HLA-C12:03	0.399941062	0.40048843	0.501862298	False
orf1a polyprotein;orf1ab polyprotein	3854	3862	KVATVQSKM	HLA-A03:01;HLA-A26:01;HLA-A30:01;HLA-A30:02;HLA-A32:01;HLA-A36:01;HLA-B57:01;HLA-B57:03;HLA-B58:01;HLA-C02:02	0.489258962	0.493114194	0.316042878	False
orf1ab polyprotein	6219	6228	IEYPIIGDEL	HLA-B18:01;HLA-B40:01;HLA-B40:02;HLA-B44:02;HLA-B44:03;HLA-B49:01;HLA-C08:01	0.429454751	0.460853527	0.421171759	False
orf1ab polyprotein	5620	5628	ALYYPSARI	HLA-A02:01;HLA-A02:03;HLA-B13:02;HLA-B49:01	0.470532328	0.543149465	0.273174788	False
surface glycoprotein	859	867	TVLPPLLTD	HLA-A02:04;HLA-A03:01;HLA-A11:01;HLA-A29:02;HLA-A32:01;HLA-B55:01	0.428574256	0.476888126	0.397140683	False
nucleocapsid phosphoprotein	324	333	VTPSGTWLTY	HLA-A01:01;HLA-A25:01;HLA-A26:01;HLA-A29:02;HLA-A32:01;HLA-A36:01;HLA-B46:01;HLA-B57:01	0.450783192	0.526834216	0.32424097	False
surface glycoprotein	35	44	GVYYPDKVFR	HLA-A03:01;HLA-A11:01;HLA-A31:01;HLA-A68:01;HLA-A74:01	0.420127147	0.43523272	0.448233304	False
orf1ab polyprotein	4402	4410	RVCGVSAAR	HLA-A03:01;HLA-A11:01;HLA-A31:01;HLA-A68:01;HLA-A74:01	0.420127147	0.43523272	0.448233304	False
orf1a polyprotein;orf1ab polyprotein	1461	1469	EAARYMRSL	HLA-A25:01;HLA-A26:01;HLA-A68:02;HLA-B35:03;HLA-C03:03;HLA-C03:04;HLA-C12:02;HLA-C12:03	0.415572906	0.441802801	0.446342199	False
orf1ab polyprotein	5221	5229	LPYPDPSRI	HLA-B07:02;HLA-B35:01;HLA-B35:03;HLA-B42:01;HLA-B51:01;HLA-B53:01;HLA-B54:01;HLA-B55:01	0.467682964	0.47958204	0.351926699	False
orf1a polyprotein;orf1ab polyprotein	3597	3607	STQWSLFFFLY	HLA-A01:01;HLA-A11:01;HLA-A29:02;HLA-A30:02;HLA-A36:01	0.424788941	0.467523316	0.409838032	False
orf1a polyprotein;orf1ab polyprotein	170	177	TRELMREL	HLA-B14:02;HLA-B39:01;HLA-C06:02;HLA-C07:02	0.433411164	0.472503601	0.394978071	False
orf1ab polyprotein	6586	6594	FRNARNGVL	HLA-B14:02;HLA-B39:01;HLA-C06:02;HLA-C07:02	0.433411164	0.472503601	0.394978071	False
ORF9b protein	6	14	SEMHPALRL	HLA-B18:01;HLA-B37:01;HLA-B40:01;HLA-B40:02;HLA-B41:01;HLA-B44:02;HLA-B44:03;HLA-B45:01;HLA-B49:01	0.458976289	0.491873391	0.346408598	False
ORF7a protein	103	112	IVAAIVFITL	HLA-A02:07;HLA-A03:01;HLA-A25:01;HLA-A68:02;HLA-B35:01;HLA-B42:01;HLA-B57:03;HLA-B81:01;HLA-C03:03;HLA-C08:01	0.451161753	0.45456456	0.40201636	False
orf1ab polyprotein	5771	5779	EIVDTVSAL	HLA-A25:01;HLA-A26:01;HLA-A68:01;HLA-A68:02;HLA-B15:09;HLA-B35:03;HLA-B39:01;HLA-C03:03;HLA-C03:04;HLA-C08:01	0.405477336	0.403519414	0.49192355	False
orf1ab polyprotein	4961	4969	RQFHQKLLK	HLA-A03:01;HLA-A11:01;HLA-A30:01;HLA-B13:02;HLA-B27:05	0.411946223	0.451955267	0.437667518	False
orf1a polyprotein;orf1ab polyprotein	941	949	FEPSTQYEY	HLA-A29:02;HLA-B44:02;HLA-B44:03;HLA-C07:02	0.450969729	0.499876165	0.343142795	False
orf1a polyprotein;orf1ab polyprotein	3542	3550	RTILGSALL	HLA-A30:01;HLA-A30:02;HLA-A32:01;HLA-A36:01;HLA-A68:02;HLA-B40:01;HLA-B48:01;HLA-B57:01;HLA-B57:03;HLA-B58:01;HLA-B58:02;HLA-C03:03;HLA-C15:02	0.421592556	0.38887897	0.490303122	False
orf1ab polyprotein	4516	4524	MADLVYALR	HLA-A01:01;HLA-A33:03;HLA-A68:01;HLA-C05:01;HLA-C08:02	0.45773786	0.513488311	0.317949025	False
orf1a polyprotein;orf1ab polyprotein	2885	2892	LPRVFSAV	HLA-B07:02;HLA-B08:01;HLA-B42:01;HLA-B51:01;HLA-B54:01;HLA-B55:01	0.467310351	0.548214378	0.266835938	False
surface glycoprotein	1089	1096	FPREGVFV	HLA-B07:02;HLA-B08:01;HLA-B42:01;HLA-B51:01;HLA-B54:01;HLA-B55:01	0.467310351	0.548214378	0.266835938	False
orf1a polyprotein;orf1ab polyprotein	142	149	SFDLGDEL	HLA-C04:01;HLA-C05:01;HLA-C08:01;HLA-C08:02;HLA-C14:02;HLA-C14:03	0.451881833	0.43320182	0.414423047	False
ORF6 protein	51	60	QLDEEQPMEI	HLA-A02:01;HLA-A02:07;HLA-C08:02	0.471907379	0.54210208	0.263395878	False
orf1a polyprotein;orf1ab polyprotein	2625	2634	SLDNVLSTFI	HLA-A02:01;HLA-A02:07;HLA-C08:02	0.471907379	0.54210208	0.263395878	False
orf1a polyprotein;orf1ab polyprotein	1141	1149	HEVLLAPLL	HLA-B15:09;HLA-B18:01;HLA-B37:01;HLA-B40:01;HLA-B40:02;HLA-B44:02;HLA-B44:03;HLA-B48:01;HLA-B49:01	0.442415409	0.481124691	0.373131938	False
orf1a polyprotein;orf1ab polyprotein	1290	1299	VVQEGVLTAV	HLA-A02:01;HLA-A02:03;HLA-A02:04;HLA-A02:07;HLA-B55:01	0.448671904	0.521428628	0.318426935	False
surface glycoprotein	83	91	VLPFNDGVY	HLA-A01:01;HLA-A29:02;HLA-A30:02;HLA-A36:01;HLA-B15:01;HLA-C01:02	0.443068699	0.492516641	0.372788994	False
orf1ab polyprotein	5473	5481	YGIATVREV	HLA-A02:03;HLA-B50:01;HLA-B51:01;HLA-B52:01;HLA-C06:02;HLA-C12:02;HLA-C12:03;HLA-C15:02	0.390909579	0.395134294	0.505768955	False
ORF7b	5	14	SLIDFYLCFL	HLA-A02:01;HLA-A02:03;HLA-A02:04;HLA-A02:07;HLA-A68:02	0.460606009	0.51626584	0.311498342	False
orf1a polyprotein;orf1ab polyprotein	2790	2798	ITPVHVMSK	HLA-A03:01;HLA-A11:01;HLA-C01:02	0.366539435	0.396689286	0.525687627	False
orf1a polyprotein;orf1ab polyprotein	1202	1211	KIAEIPKEEV	HLA-A02:01;HLA-A02:03;HLA-A02:07;HLA-A68:02	0.459851202	0.51626584	0.311498342	False
membrane glycoprotein	47	56	YIIKLIFLWL	HLA-A02:07;HLA-A25:01;HLA-A26:01;HLA-C03:03;HLA-C03:04;HLA-C08:01;HLA-C15:02;HLA-C17:01	0.373279002	0.364620138	0.545600356	False
orf1ab polyprotein	6267	6275	PQADVEWKF	HLA-A23:01;HLA-A24:02;HLA-B13:02;HLA-B15:01;HLA-B15:03;HLA-B38:01;HLA-B48:01;HLA-C02:02	0.435968958	0.418398646	0.445592316	False
ORF7b	25	32	LIIFWFSL	HLA-B08:01;HLA-C03:02;HLA-C03:03;HLA-C03:04;HLA-C08:01	0.389597952	0.431748533	0.484488648	False
ORF7a protein	109	116	FITLCFTL	HLA-B08:01;HLA-C03:02;HLA-C03:03;HLA-C03:04;HLA-C08:01	0.389597952	0.431748533	0.484488648	False
nucleocapsid phosphoprotein	103	111	DLSPRWYFY	HLA-A01:01;HLA-A26:01;HLA-A29:02;HLA-A30:02;HLA-A36:01;HLA-B08:01	0.488150438	0.561915412	0.201933608	False
orf1a polyprotein;orf1ab polyprotein	4004	4012	MADQAMTQM	HLA-B35:01;HLA-B35:03;HLA-B53:01;HLA-C03:03;HLA-C05:01;HLA-C08:02;HLA-C12:03;HLA-C17:01	0.490212518	0.50720931	0.282381927	False
orf1a polyprotein;orf1ab polyprotein	4180	4188	FVLALLSDL	HLA-A02:04;HLA-A02:07;HLA-B35:01;HLA-C03:02;HLA-C03:03;HLA-C03:04;HLA-C08:01;HLA-C17:01	0.37492015	0.349979145	0.55523218	False
surface glycoprotein	6	14	VLLPLVSSQ	HLA-A02:01;HLA-A02:03;HLA-A02:04;HLA-A32:01	0.469101893	0.547568883	0.259006144	False
ORF10 protein	5	13	NVFAFPFTI	HLA-A02:03;HLA-A02:04;HLA-A29:02;HLA-A32:01;HLA-A68:02;HLA-B13:02;HLA-B38:01;HLA-B51:01;HLA-B53:01;HLA-B58:02;HLA-C06:02;HLA-C12:02	0.453616145	0.434840426	0.405283477	False
ORF9b protein	89	96	DEFVVVTV	HLA-B08:01;HLA-B14:02;HLA-B18:01;HLA-B37:01;HLA-B40:02;HLA-B49:01;HLA-B51:01;HLA-B52:01	0.464629656	0.501888707	0.319622478	False
surface glycoprotein	453	461	YRLFRKSNL	HLA-B08:01;HLA-B14:02;HLA-B27:05;HLA-C07:02	0.451511367	0.524558964	0.307509788	False
orf1a polyprotein;orf1ab polyprotein	1152	1162	GIFGADPIHSL	HLA-A02:01;HLA-A25:01;HLA-A32:01	0.485736338	0.573094576	0.204567903	False
nucleocapsid phosphoprotein	10	17	RNAPRITF	HLA-A32:01;HLA-B15:01;HLA-B15:03;HLA-B37:01;HLA-B57:01;HLA-B57:03;HLA-B58:01;HLA-B58:02;HLA-C07:01	0.468114165	0.500206924	0.316076183	False
orf1ab polyprotein	7051	7060	KLRGTAVMSL	HLA-A02:01;HLA-A02:03;HLA-A32:01	0.468353052	0.547568883	0.259006144	False
orf1a polyprotein;orf1ab polyprotein	1867	1875	FYKENSYTT	HLA-A24:02;HLA-C07:02	0.378381146	0.397646731	0.511993629	False
orf1a polyprotein;orf1ab polyprotein	917	925	ASHMYCSFY	HLA-A01:01;HLA-A30:02;HLA-A36:01;HLA-B15:01;HLA-B46:01;HLA-C02:02;HLA-C12:03	0.459752588	0.512059145	0.309825446	False
orf1a polyprotein;orf1ab polyprotein	2749	2757	QVVNVVTTK	HLA-A03:01;HLA-A11:01;HLA-A30:01;HLA-A68:01;HLA-A68:02	0.429022804	0.432659632	0.42918953	False
orf1a polyprotein;orf1ab polyprotein	304	312	YPVASPNEC	HLA-B07:02;HLA-B35:01;HLA-B35:03;HLA-B51:01;HLA-B53:01;HLA-B54:01;HLA-B55:01	0.455419348	0.47958204	0.351926699	False
orf1a polyprotein;orf1ab polyprotein	4356	4365	CANDPVGFTL	HLA-B35:01;HLA-B35:03;HLA-C03:03;HLA-C03:04;HLA-C08:01;HLA-C08:02	0.407262513	0.41556794	0.466810897	False
orf1a polyprotein;orf1ab polyprotein	4174	4182	TTKGGRFVL	HLA-A25:01;HLA-A32:01;HLA-A68:02;HLA-B42:01;HLA-B57:03;HLA-B58:02;HLA-C02:02;HLA-C07:01;HLA-C12:02;HLA-C12:03	0.505614177	0.518295021	0.238495749	False
orf1a polyprotein;orf1ab polyprotein	221	229	FIDTKRGVY	HLA-A01:01;HLA-A29:02;HLA-A30:02;HLA-A36:01;HLA-C02:02;HLA-C05:01;HLA-C08:02	0.519634539	0.571588073	0.131927335	False
orf1a polyprotein;orf1ab polyprotein	3747	3756	VVTTVMFLAR	HLA-A03:01;HLA-A11:01;HLA-A31:01;HLA-A68:01	0.407291052	0.435142535	0.446553276	False
orf1a polyprotein;orf1ab polyprotein	4066	4074	TAAKLMVVI	HLA-A68:02;HLA-B35:03;HLA-B51:01;HLA-B53:01;HLA-B57:03;HLA-C06:02;HLA-C08:01;HLA-C12:02;HLA-C12:03	0.415566999	0.380453637	0.490378051	False
orf1ab polyprotein	6453	6461	SLENVAFNV	HLA-A02:01;HLA-A02:04;HLA-A02:07;HLA-B13:02	0.454251378	0.530299082	0.291592473	False
orf1a polyprotein;orf1ab polyprotein	1114	1122	CLHVVGPNV	HLA-A02:01;HLA-A02:04;HLA-A02:07;HLA-B13:02	0.454251378	0.530299082	0.291592473	False
orf1a polyprotein;orf1ab polyprotein	449	457	NLLEILQKE	HLA-A02:01;HLA-A02:04;HLA-A02:07;HLA-B13:02	0.454251378	0.530299082	0.291592473	False
orf1a polyprotein;orf1ab polyprotein	641	648	FLRDGWEI	HLA-A02:01;HLA-B46:01;HLA-C03:02	0.438288643	0.505886296	0.356618467	False
orf1a polyprotein;orf1ab polyprotein	469	477	LNEEIAIIL	HLA-B35:01;HLA-B35:03;HLA-C04:01;HLA-C05:01;HLA-C08:02	0.494183433	0.497430531	0.283744906	False
orf1a polyprotein;orf1ab polyprotein	2151	2159	STTTNIVTR	HLA-A11:01;HLA-A26:01;HLA-A31:01;HLA-A33:03;HLA-A68:01;HLA-A74:01;HLA-B57:01	0.34292248	0.309347578	0.612630493	False
orf1a polyprotein;orf1ab polyprotein	2868	2876	GLPGTILRT	HLA-A02:01;HLA-A02:07;HLA-B13:02	0.453508417	0.530299082	0.291592473	False
orf1a polyprotein;orf1ab polyprotein	979	988	WLDDDSQQTV	HLA-A02:01;HLA-A02:07;HLA-B13:02	0.453508417	0.530299082	0.291592473	False
orf1ab polyprotein	5621	5630	LYYPSARIVY	HLA-A29:02;HLA-A30:02;HLA-B15:03;HLA-B35:01;HLA-C07:02;HLA-C14:02;HLA-C14:03	0.435972252	0.427700092	0.426926762	False
surface glycoprotein	857	865	GLTVLPPLL	HLA-A02:01;HLA-A02:03;HLA-A02:04;HLA-A02:07;HLA-C17:01	0.453651865	0.511029038	0.312975114	False
orf1a polyprotein;orf1ab polyprotein	3085	3094	FLMSFTVLCL	HLA-A02:01;HLA-A02:03;HLA-A02:04;HLA-A02:07;HLA-C17:01	0.453651865	0.511029038	0.312975114	False
orf1a polyprotein;orf1ab polyprotein	2563	2571	QLMCQPILL	HLA-A02:01;HLA-A02:03;HLA-A02:04;HLA-A02:07;HLA-C17:01	0.453651865	0.511029038	0.312975114	False
orf1a polyprotein;orf1ab polyprotein	3312	3320	MLNPNYEDL	HLA-A02:01;HLA-A02:03;HLA-A02:04;HLA-A02:07;HLA-C17:01	0.453651865	0.511029038	0.312975114	False
orf1a polyprotein;orf1ab polyprotein	2780	2789	FLFVAAIFYL	HLA-A02:01;HLA-A02:03;HLA-A02:04;HLA-A02:07;HLA-C17:01	0.453651865	0.511029038	0.312975114	False
orf1ab polyprotein	6715	6723	FELEDFIPM	HLA-B18:01;HLA-B35:01;HLA-B40:01;HLA-B40:02;HLA-B44:02;HLA-B45:01;HLA-B49:01;HLA-B50:01	0.458349469	0.48951833	0.332641714	False
orf1a polyprotein;orf1ab polyprotein	4185	4193	LSDLQDLKW	HLA-A01:01;HLA-A36:01;HLA-B53:01;HLA-B57:01;HLA-B57:03;HLA-B58:01;HLA-C05:01;HLA-C08:02	0.479828335	0.528269205	0.255020964	False
orf1a polyprotein;orf1ab polyprotein	2054	2062	NPTIQKDVL	HLA-B07:02;HLA-B08:01;HLA-B35:01;HLA-B35:03;HLA-B42:01;HLA-B81:01	0.487850202	0.561597106	0.20854067	False
orf1a polyprotein;orf1ab polyprotein	4358	4365	NDPVGFTL	HLA-B37:01;HLA-C01:02;HLA-C07:02;HLA-C14:02	0.34895763	0.362685486	0.560716207	False
orf1a polyprotein;orf1ab polyprotein	2231	2238	IWFLLLSV	HLA-B14:02;HLA-B37:01;HLA-B49:01;HLA-B50:01;HLA-B51:01;HLA-B52:01;HLA-B54:01;HLA-C03:02;HLA-C04:01	0.42930697	0.383498033	0.470588783	False
surface glycoprotein	688	695	ASQSIIAY	HLA-A01:01;HLA-A30:02;HLA-A36:01;HLA-B15:01;HLA-B15:03;HLA-B46:01;HLA-C03:02;HLA-C12:03	0.432554567	0.474048689	0.382964995	False
orf1a polyprotein;orf1ab polyprotein	539	547	EAARVVRSI	HLA-A25:01;HLA-A68:01;HLA-A68:02;HLA-B35:03;HLA-B51:01;HLA-B53:01;HLA-C06:02;HLA-C12:02;HLA-C12:03	0.446663355	0.434085724	0.404630041	False
orf1ab polyprotein	5138	5147	YAYLRKHFSM	HLA-C03:02;HLA-C03:03;HLA-C03:04;HLA-C08:01;HLA-C12:02;HLA-C12:03	0.348428015	0.35438775	0.567378092	False
orf1a polyprotein;orf1ab polyprotein	2122	2130	LATHGLAAV	HLA-A68:02;HLA-B35:03;HLA-B51:01;HLA-B54:01;HLA-C02:02;HLA-C03:02;HLA-C03:04;HLA-C12:03	0.413326019	0.402634411	0.468070406	False
surface glycoprotein	1216	1224	IWLGFIAGL	HLA-A02:04;HLA-A23:01;HLA-A24:02;HLA-B27:05;HLA-C04:01	0.439637689	0.398149161	0.447658695	False
orf1ab polyprotein	7001	7009	EAFLIGCNY	HLA-A26:01;HLA-A29:02;HLA-A33:03;HLA-A68:01;HLA-B35:01;HLA-B46:01;HLA-B53:01;HLA-C02:02;HLA-C12:03	0.435550522	0.387655237	0.460791221	False
orf1a polyprotein;orf1ab polyprotein	3763	3771	VEYCPIFFI	HLA-B40:01;HLA-B40:02;HLA-B44:02;HLA-B44:03;HLA-B49:01;HLA-B51:01	0.423817487	0.459672095	0.398429128	False
orf1ab polyprotein	4506	4514	ISRQRLTKY	HLA-A01:01;HLA-A30:02;HLA-A36:01;HLA-B15:01;HLA-B15:03;HLA-B46:01;HLA-B57:01;HLA-B57:03;HLA-C02:02	0.464669095	0.503315112	0.30368469	False
orf1a polyprotein;orf1ab polyprotein	2669	2677	SCNNYMLTY	HLA-A25:01;HLA-A29:02;HLA-A30:02;HLA-A32:01;HLA-A36:01;HLA-B15:01;HLA-B15:03;HLA-B18:01;HLA-B46:01;HLA-B53:01;HLA-C02:02;HLA-C03:02;HLA-C14:02;HLA-C14:03	0.457360717	0.420960432	0.406635887	False
ORF9b protein	85	94	EELPDEFVVV	HLA-B18:01;HLA-B40:01;HLA-B40:02;HLA-B41:01;HLA-B44:02;HLA-B44:03;HLA-B45:01;HLA-B49:01;HLA-B50:01	0.45632968	0.484145667	0.33447036	False
surface glycoprotein	339	347	GEVFNATRF	HLA-B15:03;HLA-B18:01;HLA-B37:01;HLA-B40:01;HLA-B40:02;HLA-B44:02;HLA-B44:03;HLA-B49:01	0.451477083	0.481671998	0.340915814	False
orf1a polyprotein;orf1ab polyprotein	4224	4232	KVKYLYFIK	HLA-A03:01;HLA-A11:01;HLA-A30:01;HLA-A31:01;HLA-A74:01	0.408851394	0.417632603	0.451170911	False
orf1a polyprotein;orf1ab polyprotein	744	752	GETLPTEVL	HLA-B15:09;HLA-B18:01;HLA-B40:01;HLA-B40:02;HLA-B44:02;HLA-B44:03;HLA-B48:01;HLA-B49:01;HLA-B50:01	0.439728648	0.473315967	0.36143919	False
orf1a polyprotein;orf1ab polyprotein	2496	2504	VKNGSIHLY	HLA-A29:02;HLA-A30:02;HLA-A36:01;HLA-B15:01;HLA-B15:03;HLA-C02:02;HLA-C07:02	0.4651742	0.47295636	0.329239655	False
orf1a polyprotein;orf1ab polyprotein	1337	1345	YTVEEAKTV	HLA-A25:01;HLA-A26:01;HLA-A68:02;HLA-C02:02;HLA-C06:02;HLA-C12:02;HLA-C12:03;HLA-C15:02	0.436605658	0.441249759	0.396608799	False
orf1a polyprotein;orf1ab polyprotein	3426	3434	HHMELPTGV	HLA-A02:01;HLA-A02:03;HLA-B15:09;HLA-B38:01;HLA-B39:01	0.458345227	0.535005662	0.263458181	False
orf1a polyprotein;orf1ab polyprotein	3173	3181	STFEEAALC	HLA-A11:01;HLA-A26:01;HLA-A29:02;HLA-A30:01;HLA-A30:02;HLA-A68:01;HLA-A68:02;HLA-A74:01;HLA-B57:01;HLA-B57:03	0.427067394	0.37072873	0.475601888	False
orf1ab polyprotein	4854	4862	TMCDIRQLL	HLA-A02:04;HLA-A02:07;HLA-A23:01;HLA-A32:01;HLA-A68:02;HLA-B38:01;HLA-B44:02;HLA-B44:03;HLA-C06:02	0.468892434	0.485313207	0.308822614	False
orf1a polyprotein;orf1ab polyprotein	3612	3621	LPFAMGIIAM	HLA-B07:02;HLA-B35:01;HLA-B35:03;HLA-B42:01;HLA-B51:01;HLA-B54:01;HLA-B55:01;HLA-B81:01	0.443079251	0.47489687	0.351926699	False
orf1ab polyprotein	6043	6051	VAVPTGYVD	HLA-B35:03;HLA-B53:01;HLA-B58:01;HLA-C03:03;HLA-C03:04;HLA-C08:01;HLA-C12:03	0.381446315	0.36780494	0.515139932	False
orf1a polyprotein;orf1ab polyprotein	2384	2391	YIFFASFY	HLA-A01:01;HLA-A29:02;HLA-B15:01;HLA-B46:01;HLA-C02:02;HLA-C03:02	0.432105784	0.490627723	0.351777437	False
orf1a polyprotein;orf1ab polyprotein	3693	3701	ILMTARTVY	HLA-A01:01;HLA-A29:02;HLA-A30:02;HLA-A32:01;HLA-A36:01;HLA-B15:01;HLA-B15:03;HLA-B46:01;HLA-C14:03	0.458675734	0.504648206	0.306659501	False
orf1ab polyprotein	6437	6444	KQFDTYNL	HLA-A32:01;HLA-B13:02;HLA-B15:01;HLA-B15:03;HLA-B37:01;HLA-B48:01;HLA-B52:01;HLA-C07:01	0.45315898	0.492357266	0.319179154	False
orf1a polyprotein;orf1ab polyprotein	3581	3588	HWLLLTIL	HLA-B08:01;HLA-B14:02;HLA-B37:01;HLA-B52:01;HLA-C03:02;HLA-C04:01	0.453323062	0.462599525	0.354713198	False
orf1a polyprotein;orf1ab polyprotein	3678	3686	KLKDCVMYA	HLA-A02:01;HLA-A02:03;HLA-A30:01	0.461911014	0.523140698	0.272066824	False
orf1a polyprotein;orf1ab polyprotein	446	454	LNDNLLEIL	HLA-A02:07;HLA-B38:01;HLA-C04:01;HLA-C05:01;HLA-C08:01;HLA-C08:02	0.451192152	0.440759089	0.380226942	False
membrane glycoprotein	44	52	RFLYIIKLI	HLA-A23:01;HLA-A24:02;HLA-A30:01;HLA-B13:02;HLA-B44:02;HLA-B52:01;HLA-B58:02	0.418894803	0.404848769	0.450917433	False
membrane glycoprotein	80	88	IAIAMACLV	HLA-B51:01;HLA-C02:02;HLA-C06:02;HLA-C12:02;HLA-C12:03;HLA-C15:02	0.418663298	0.427248001	0.425193602	False
orf1ab polyprotein	6702	6710	LLIGLAKRF	HLA-A24:02;HLA-A26:01;HLA-A29:02;HLA-B15:01;HLA-B46:01;HLA-B53:01	0.383245921	0.373533621	0.507146132	False
surface glycoprotein	1223	1230	GLIAIVMV	HLA-A02:01;HLA-A02:03;HLA-A02:04;HLA-B13:02	0.453161271	0.530299082	0.271490226	False
orf1a polyprotein;orf1ab polyprotein	2126	2133	GLAAVNSV	HLA-A02:01;HLA-A02:03;HLA-A02:04;HLA-B13:02	0.453161271	0.530299082	0.271490226	False
orf1ab polyprotein	6450	6457	RLQSLENV	HLA-A02:01;HLA-A02:03;HLA-A02:04;HLA-B13:02	0.453161271	0.530299082	0.271490226	False
orf1a polyprotein;orf1ab polyprotein	1109	1117	NLAKHCLHV	HLA-A02:01;HLA-A02:03;HLA-A02:04;HLA-B13:02	0.453161271	0.530299082	0.271490226	False
orf1ab polyprotein	5046	5054	RLANECAQV	HLA-A02:01;HLA-A02:03;HLA-A02:04;HLA-B13:02	0.453161271	0.530299082	0.271490226	False
orf1ab polyprotein	5962	5970	GLCVDIPGI	HLA-A02:01;HLA-A02:03;HLA-A02:04;HLA-B13:02	0.453161271	0.530299082	0.271490226	False
orf1ab polyprotein	5931	5939	GLFKDCSKV	HLA-A02:01;HLA-A02:03;HLA-A02:04;HLA-B13:02	0.453161271	0.530299082	0.271490226	False
orf1a polyprotein;orf1ab polyprotein	702	710	ALNLGETFV	HLA-A02:01;HLA-A02:03;HLA-A02:04;HLA-B13:02	0.453161271	0.530299082	0.271490226	False
surface glycoprotein	1223	1232	GLIAIVMVTI	HLA-A02:01;HLA-A02:03;HLA-B13:02	0.452417569	0.530299082	0.271490226	False
ORF9b protein	13	22	RLVDPQIQLA	HLA-A02:01;HLA-A02:03;HLA-B13:02	0.452417569	0.530299082	0.271490226	False
orf1a polyprotein;orf1ab polyprotein	3893	3901	QLHNDILLA	HLA-A02:01;HLA-A02:03;HLA-B13:02	0.452417569	0.530299082	0.271490226	False
orf1a polyprotein;orf1ab polyprotein	1477	1486	VSSPDAVTAY	HLA-A01:01;HLA-A30:02;HLA-A36:01;HLA-B15:01;HLA-B46:01;HLA-B57:01;HLA-B57:03;HLA-B58:01	0.419538273	0.468650747	0.386479438	False
orf1ab polyprotein	6149	6156	YACWHHSI	HLA-B51:01;HLA-C03:02;HLA-C03:04;HLA-C08:01;HLA-C08:02;HLA-C12:03	0.379375012	0.374309999	0.50742713	False
orf1ab polyprotein	5154	5162	AVVCFNSTY	HLA-A25:01;HLA-A26:01;HLA-A29:02;HLA-A30:02;HLA-A32:01;HLA-A36:01;HLA-B15:01;HLA-B15:03;HLA-B46:01;HLA-B57:01;HLA-B58:01;HLA-C02:02	0.440862766	0.434800194	0.395698469	False
surface glycoprotein	190	198	REFVFKNID	HLA-B18:01;HLA-B40:01;HLA-B40:02;HLA-B41:01;HLA-B45:01;HLA-B49:01;HLA-B50:01;HLA-C07:01	0.461634708	0.488704416	0.307505353	False
orf1a polyprotein;orf1ab polyprotein	1680	1688	LLTLQQIEL	HLA-A02:01;HLA-B81:01;HLA-C08:02;HLA-C17:01	0.490640494	0.548434632	0.19035732	False
orf1a polyprotein;orf1ab polyprotein	3283	3290	VTCGTTTL	HLA-C01:02;HLA-C03:03;HLA-C05:01;HLA-C08:02;HLA-C12:03	0.410887322	0.456565648	0.397466987	False
orf1a polyprotein;orf1ab polyprotein	4118	4126	NSPNLAWPL	HLA-C01:02;HLA-C07:02;HLA-C08:01	0.32795603	0.326517164	0.58937536	False
orf1ab polyprotein	5813	5820	NRPQIGVV	HLA-B14:02;HLA-C06:02;HLA-C07:02	0.422568005	0.461973325	0.378538678	False
membrane glycoprotein	157	164	GRCDIKDL	HLA-B14:02;HLA-C06:02;HLA-C07:02	0.422568005	0.461973325	0.378538678	False
orf1a polyprotein;orf1ab polyprotein	1175	1183	LAVFDKNLY	HLA-A01:01;HLA-A29:02;HLA-A36:01;HLA-B35:01;HLA-B53:01;HLA-B57:01;HLA-C02:02	0.488886862	0.523739027	0.219636139	False
orf1a polyprotein;orf1ab polyprotein	3	11	SLVPGFNEK	HLA-A03:01;HLA-A11:01;HLA-A30:01;HLA-A68:01;HLA-A74:01	0.413979864	0.419950208	0.430473191	False
orf1a polyprotein;orf1ab polyprotein	85	92	MVELVAEL	HLA-C03:02;HLA-C04:01;HLA-C05:01;HLA-C08:01;HLA-C08:02	0.439607562	0.417785219	0.40617564	False
orf1ab polyprotein	6759	6768	KSQDLSVVSK	HLA-A03:01;HLA-A11:01;HLA-A30:01;HLA-A31:01	0.39589178	0.417541024	0.449495358	False
orf1a polyprotein;orf1ab polyprotein	3489	3498	TLNDFNLVAM	HLA-A02:01;HLA-A02:03;HLA-A02:04;HLA-B46:01	0.433682484	0.504440318	0.326954761	False
orf1a polyprotein;orf1ab polyprotein	2145	2153	FLNKVVSTT	HLA-A02:01;HLA-A02:03;HLA-A02:04;HLA-B46:01	0.433682484	0.504440318	0.326954761	False
membrane glycoprotein	45	53	FLYIIKLIF	HLA-A29:02;HLA-A32:01;HLA-B08:01;HLA-B15:01;HLA-B46:01;HLA-B53:01;HLA-C03:02;HLA-C12:02;HLA-C17:01	0.430025915	0.452112537	0.38489723	False
membrane glycoprotein	23	31	VIGFLFLTW	HLA-A24:02;HLA-A29:02;HLA-A32:01;HLA-B57:01;HLA-C08:01;HLA-C15:02	0.361257713	0.358011629	0.531117972	False
membrane glycoprotein	101	109	RLFARTRSM	HLA-A02:03;HLA-A03:01;HLA-A30:01;HLA-A30:02;HLA-A32:01;HLA-A74:01;HLA-B13:02;HLA-B15:01;HLA-B15:03;HLA-B37:01	0.468822353	0.486803273	0.29287153	False
orf1a polyprotein;orf1ab polyprotein	3612	3620	LPFAMGIIA	HLA-B07:02;HLA-B35:01;HLA-B35:03;HLA-B51:01;HLA-B54:01;HLA-B55:01;HLA-B81:01	0.430537019	0.47489687	0.351926699	False
orf1a polyprotein;orf1ab polyprotein	3726	3734	ALDQAISMW	HLA-A01:01;HLA-A02:07;HLA-A25:01;HLA-A32:01;HLA-A36:01;HLA-C05:01;HLA-C08:02	0.461052575	0.542506079	0.224203736	False
orf1a polyprotein;orf1ab polyprotein	1875	1882	TTIKPVTY	HLA-B15:01;HLA-B18:01;HLA-B46:01;HLA-B57:01;HLA-B57:03;HLA-B58:01;HLA-B58:02;HLA-C02:02;HLA-C12:02;HLA-C12:03	0.408707096	0.417481223	0.434372873	False
orf1ab polyprotein	5241	5248	KTDGTLMI	HLA-A01:01;HLA-A36:01;HLA-B58:01;HLA-C05:01;HLA-C08:02;HLA-C15:02	0.445419107	0.507677251	0.296298142	False
surface glycoprotein	989	996	AEVQIDRL	HLA-B18:01;HLA-B37:01;HLA-B40:01;HLA-B40:02;HLA-B44:02;HLA-B44:03;HLA-B49:01	0.434013941	0.480389694	0.340461106	False
orf1ab polyprotein	5267	5275	QEYADVFHL	HLA-B18:01;HLA-B37:01;HLA-B40:01;HLA-B40:02;HLA-B44:02;HLA-B44:03;HLA-B49:01	0.434013941	0.480389694	0.340461106	False
orf1ab polyprotein	4462	4469	FVVKRHTF	HLA-B08:01;HLA-B15:01;HLA-B58:01;HLA-C02:02;HLA-C03:02;HLA-C03:03	0.416827819	0.469249216	0.371929885	False
orf1a polyprotein;orf1ab polyprotein	114	122	IPVAYRKVL	HLA-B07:02;HLA-B14:02;HLA-B35:01;HLA-B35:03;HLA-B42:01;HLA-B51:01;HLA-B81:01	0.463321665	0.49450744	0.29086759	False
orf1a polyprotein;orf1ab polyprotein	3076	3084	HVVAFNTLL	HLA-A26:01;HLA-A68:02;HLA-B15:09;HLA-B35:01;HLA-B35:03;HLA-B38:01;HLA-B48:01;HLA-B57:03;HLA-B81:01;HLA-C06:02;HLA-C15:02;HLA-C17:01	0.439873689	0.411173094	0.406318886	False
orf1ab polyprotein	4855	4863	MCDIRQLLF	HLA-A01:01;HLA-A36:01;HLA-B37:01;HLA-B38:01;HLA-B53:01;HLA-C04:01	0.477684229	0.492539059	0.268887756	False
orf1a polyprotein;orf1ab polyprotein	2121	2129	TLATHGLAA	HLA-A02:01;HLA-A02:03;HLA-B50:01;HLA-B55:01	0.454017891	0.529256396	0.255804288	False
orf1a polyprotein;orf1ab polyprotein	1248	1257	FLTENLLLYI	HLA-A02:01;HLA-A02:03;HLA-A02:04;HLA-A02:07	0.433434039	0.504440318	0.311033598	False
orf1a polyprotein;orf1ab polyprotein	3467	3475	VLAWLYAAV	HLA-A02:01;HLA-A02:03;HLA-A02:04;HLA-A02:07	0.433434039	0.504440318	0.311033598	False
envelope protein	18	27	LLFLAFVVFL	HLA-A02:01;HLA-A02:03;HLA-A02:04;HLA-A02:07	0.433434039	0.504440318	0.311033598	False
orf1a polyprotein;orf1ab polyprotein	214	222	TLSEQLDFI	HLA-A02:01;HLA-A02:03;HLA-A02:04;HLA-A02:07	0.433434039	0.504440318	0.311033598	False
orf1a polyprotein;orf1ab polyprotein	3083	3091	LLFLMSFTV	HLA-A02:01;HLA-A02:03;HLA-A02:04;HLA-A02:07	0.433434039	0.504440318	0.311033598	False
ORF7a protein	101	110	FLIVAAIVFI	HLA-A02:01;HLA-A02:03;HLA-A02:04;HLA-A02:07	0.433434039	0.504440318	0.311033598	False
surface glycoprotein	225	233	PLVDLPIGI	HLA-A02:01;HLA-A02:03;HLA-A02:04;HLA-A02:07	0.433434039	0.504440318	0.311033598	False
orf1a polyprotein;orf1ab polyprotein	1985	1994	LLHKPIVWHV	HLA-A02:01;HLA-A02:03;HLA-A02:04;HLA-A02:07	0.433434039	0.504440318	0.311033598	False
orf1ab polyprotein	5640	5649	ALCEKALKYL	HLA-A02:01;HLA-A02:03;HLA-A02:04;HLA-A02:07	0.433434039	0.504440318	0.311033598	False
orf1a polyprotein;orf1ab polyprotein	2363	2372	WLMWLIINLV	HLA-A02:01;HLA-A02:03;HLA-A02:04;HLA-A02:07	0.433434039	0.504440318	0.311033598	False
orf1a polyprotein;orf1ab polyprotein	103	111	TLGVLVPHV	HLA-A02:01;HLA-A02:03;HLA-A02:04;HLA-A02:07	0.433434039	0.504440318	0.311033598	False
orf1a polyprotein;orf1ab polyprotein	2470	2477	ARDLSLQF	HLA-B37:01;HLA-B39:01;HLA-C04:01;HLA-C07:01	0.482675523	0.494003713	0.267775599	False
orf1ab polyprotein	5916	5924	IPRRNVATL	HLA-B07:02;HLA-B35:01;HLA-B35:03;HLA-B42:01;HLA-B51:01;HLA-B53:01;HLA-B55:01;HLA-B81:01	0.468872336	0.47958204	0.299431	False
orf1ab polyprotein	5221	5230	LPYPDPSRIL	HLA-B07:02;HLA-B35:01;HLA-B35:03;HLA-B42:01;HLA-B51:01;HLA-B53:01;HLA-B55:01;HLA-B81:01	0.468872336	0.47958204	0.299431	False
orf1a polyprotein;orf1ab polyprotein	2901	2909	KLIEYTDFA	HLA-A02:01;HLA-A02:03;HLA-A02:07	0.43266046	0.504440318	0.311033598	False
orf1a polyprotein;orf1ab polyprotein	2392	2401	YVWKSYVHVV	HLA-A02:01;HLA-A02:03;HLA-A02:07	0.43266046	0.504440318	0.311033598	False
orf1a polyprotein;orf1ab polyprotein	359	368	YLPQNAVVKI	HLA-A02:01;HLA-A02:03;HLA-A02:07	0.43266046	0.504440318	0.311033598	False
orf1a polyprotein;orf1ab polyprotein	529	537	ILSPLYAFA	HLA-A02:01;HLA-A02:03;HLA-A02:07	0.43266046	0.504440318	0.311033598	False
orf1a polyprotein;orf1ab polyprotein	2457	2464	TFCAGSTF	HLA-A24:02;HLA-C04:01;HLA-C14:02;HLA-C14:03	0.38996002	0.349831908	0.50844596	False
surface glycoprotein	58	65	FFSNVTWF	HLA-A24:02;HLA-C04:01;HLA-C14:02;HLA-C14:03	0.38996002	0.349831908	0.50844596	False
orf1a polyprotein;orf1ab polyprotein	3782	3789	VYCFLGYF	HLA-A24:02;HLA-C04:01;HLA-C14:02;HLA-C14:03	0.38996002	0.349831908	0.50844596	False
orf1a polyprotein;orf1ab polyprotein	3210	3217	LYNKYKYF	HLA-A24:02;HLA-C04:01;HLA-C14:02;HLA-C14:03	0.38996002	0.349831908	0.50844596	False
orf1a polyprotein;orf1ab polyprotein	1674	1681	CYLATALL	HLA-A24:02;HLA-C04:01;HLA-C14:02;HLA-C14:03	0.38996002	0.349831908	0.50844596	False
orf1ab polyprotein	5178	5186	LYYQNNVFM	HLA-A24:02;HLA-C04:01;HLA-C14:02;HLA-C14:03	0.38996002	0.349831908	0.50844596	False
orf1ab polyprotein	5924	5932	LQAENVTGL	HLA-A02:03;HLA-A02:04;HLA-B13:02;HLA-B14:02;HLA-B15:01;HLA-B15:03;HLA-B15:09;HLA-B38:01;HLA-B39:01;HLA-B48:01;HLA-B81:01;HLA-C02:02;HLA-C06:02	0.449613528	0.462046993	0.339550384	False
ORF6 protein	7	15	FQVTIAEIL	HLA-B15:09;HLA-B38:01;HLA-B39:01;HLA-B48:01;HLA-C02:02;HLA-C03:03;HLA-C03:04;HLA-C08:01;HLA-C12:02	0.378476591	0.374967809	0.496731689	False
orf1ab polyprotein	4530	4538	NCDTLKEIL	HLA-B38:01;HLA-B39:01;HLA-C04:01;HLA-C05:01;HLA-C08:01;HLA-C08:02	0.458152557	0.451602688	0.340194614	False
surface glycoprotein	1062	1070	FLHVTYVPA	HLA-A02:01;HLA-B46:01;HLA-B54:01	0.432178763	0.504440318	0.327001521	False
envelope protein	49	57	VSLVKPSFY	HLA-A01:01;HLA-A29:02;HLA-A30:02;HLA-A36:01;HLA-B46:01;HLA-B57:01;HLA-B58:01;HLA-C02:02	0.444325976	0.475451766	0.340892008	False
orf1a polyprotein;orf1ab polyprotein	3060	3067	LAYYFMRF	HLA-B46:01;HLA-B51:01;HLA-B53:01;HLA-C02:02;HLA-C03:02;HLA-C03:03;HLA-C12:02;HLA-C12:03;HLA-C17:01	0.39808531	0.358761626	0.490271746	False
orf1a polyprotein;orf1ab polyprotein	4245	4252	SLAATVRL	HLA-A02:01;HLA-A02:03;HLA-A02:04;HLA-B48:01;HLA-B81:01;HLA-C17:01	0.458763068	0.511527661	0.270595095	False
orf1a polyprotein;orf1ab polyprotein	3499	3507	KYNYEPLTQ	HLA-A23:01;HLA-A24:02;HLA-C07:01	0.432158269	0.441999447	0.385955553	False
orf1ab polyprotein	5306	5314	RYWEPEFYE	HLA-A23:01;HLA-A24:02;HLA-C07:01	0.432158269	0.441999447	0.385955553	False
orf1ab polyprotein	4913	4922	YEDQDALFAY	HLA-A01:01;HLA-B18:01;HLA-B44:02;HLA-B44:03	0.461969842	0.54545928	0.206770049	False
orf1ab polyprotein	4452	4461	DEDDNLIDSY	HLA-A01:01;HLA-B18:01;HLA-B44:02;HLA-B44:03	0.461969842	0.54545928	0.206770049	False
orf1a polyprotein;orf1ab polyprotein	2315	2323	KWDLTAFGL	HLA-B40:01;HLA-C04:01;HLA-C05:01;HLA-C08:02	0.463344169	0.479572743	0.303591431	False
orf1ab polyprotein	6806	6814	GVAMPNLYK	HLA-A03:01;HLA-A11:01;HLA-A30:01;HLA-A68:01	0.401076283	0.419858811	0.42876636	False
orf1a polyprotein;orf1ab polyprotein	693	701	IIIGGAKLK	HLA-A03:01;HLA-A11:01;HLA-A30:01;HLA-A68:01	0.401076283	0.419858811	0.42876636	False
orf1a polyprotein;orf1ab polyprotein	1272	1280	SDIDITFLK	HLA-A03:01;HLA-A11:01;HLA-A30:01;HLA-A68:01	0.401076283	0.419858811	0.42876636	False
surface glycoprotein	925	933	NQFNSAIGK	HLA-A03:01;HLA-A11:01;HLA-A30:01;HLA-A68:01	0.401076283	0.419858811	0.42876636	False
orf1ab polyprotein	6386	6394	SDIDYVPLK	HLA-A03:01;HLA-A11:01;HLA-A30:01;HLA-A68:01	0.401076283	0.419858811	0.42876636	False
orf1a polyprotein;orf1ab polyprotein	2753	2761	VVTTKIALK	HLA-A03:01;HLA-A11:01;HLA-A30:01;HLA-A68:01	0.401076283	0.419858811	0.42876636	False
orf1ab polyprotein	4425	4433	RAFDIYNDK	HLA-A03:01;HLA-A11:01;HLA-A30:01;HLA-A68:01	0.401076283	0.419858811	0.42876636	False
orf1a polyprotein;orf1ab polyprotein	273	282	FVFPLNSIIK	HLA-A03:01;HLA-A11:01;HLA-A30:01;HLA-A68:01	0.401076283	0.419858811	0.42876636	False
orf1a polyprotein;orf1ab polyprotein	2541	2548	IVFDGKSK	HLA-A03:01;HLA-A11:01;HLA-A30:01;HLA-A68:01	0.401076283	0.419858811	0.42876636	False
orf1ab polyprotein	6950	6958	YICGFIQQK	HLA-A03:01;HLA-A11:01;HLA-A30:01;HLA-A68:01	0.401076283	0.419858811	0.42876636	False
orf1ab polyprotein	5504	5513	YVFTGYRVTK	HLA-A03:01;HLA-A11:01;HLA-A30:01;HLA-A68:01	0.401076283	0.419858811	0.42876636	False
membrane glycoprotein	6	15	GTITVEELKK	HLA-A03:01;HLA-A11:01;HLA-A30:01;HLA-A68:01	0.401076283	0.419858811	0.42876636	False
orf1a polyprotein;orf1ab polyprotein	692	701	SIIIGGAKLK	HLA-A03:01;HLA-A11:01;HLA-A30:01;HLA-A68:01	0.401076283	0.419858811	0.42876636	False
orf1a polyprotein;orf1ab polyprotein	2051	2059	VVENPTIQK	HLA-A03:01;HLA-A11:01;HLA-A30:01;HLA-A68:01	0.401076283	0.419858811	0.42876636	False
orf1a polyprotein;orf1ab polyprotein	1272	1281	SDIDITFLKK	HLA-A03:01;HLA-A11:01;HLA-A30:01;HLA-A68:01	0.401076283	0.419858811	0.42876636	False
orf1a polyprotein;orf1ab polyprotein	2614	2622	ATAEAELAK	HLA-A03:01;HLA-A11:01;HLA-A30:01;HLA-A68:01	0.401076283	0.419858811	0.42876636	False
orf1ab polyprotein	4456	4465	NLIDSYFVVK	HLA-A03:01;HLA-A11:01;HLA-A30:01;HLA-A68:01	0.401076283	0.419858811	0.42876636	False
orf1a polyprotein;orf1ab polyprotein	2071	2078	VVGDIILK	HLA-A03:01;HLA-A11:01;HLA-A30:01;HLA-A68:01	0.401076283	0.419858811	0.42876636	False
surface glycoprotein	89	97	GVYFASTEK	HLA-A03:01;HLA-A11:01;HLA-A30:01;HLA-A68:01	0.401076283	0.419858811	0.42876636	False
surface glycoprotein	1196	1205	SLIDLQELGK	HLA-A03:01;HLA-A11:01;HLA-A30:01;HLA-A68:01	0.401076283	0.419858811	0.42876636	False
surface glycoprotein	557	565	KKFLPFQQF	HLA-A24:02;HLA-A32:01;HLA-B15:01;HLA-B15:03;HLA-B37:01;HLA-B48:01;HLA-B57:01;HLA-B57:03	0.387367471	0.3979036	0.464829472	False
orf1a polyprotein;orf1ab polyprotein	2905	2913	YTDFATSAC	HLA-A01:01;HLA-A36:01;HLA-C03:03;HLA-C05:01;HLA-C08:02	0.460391414	0.544117179	0.208409224	False
surface glycoprotein	894	902	LQIPFAMQM	HLA-B15:01;HLA-B15:03;HLA-B15:09;HLA-C02:02;HLA-C03:02;HLA-C03:04;HLA-C12:02;HLA-C12:03	0.407503043	0.414023898	0.427901639	False
orf1a polyprotein;orf1ab polyprotein	3850	3858	KPCIKVATV	HLA-B07:02;HLA-B08:01;HLA-B42:01;HLA-B51:01;HLA-B55:01	0.463983218	0.548214378	0.209554535	False
envelope protein	50	58	SLVKPSFYV	HLA-A02:01;HLA-A02:04;HLA-A02:07;HLA-A68:02	0.457337113	0.51626584	0.258024496	False
orf1a polyprotein;orf1ab polyprotein	1033	1041	KLTDNVYIK	HLA-A03:01;HLA-A11:01;HLA-A30:01;HLA-A32:01	0.396480104	0.429416163	0.420209126	False
orf1ab polyprotein	5449	5457	TCTERLKLF	HLA-A23:01;HLA-A24:02;HLA-A25:01;HLA-B44:02;HLA-B44:03	0.419077654	0.430743281	0.400932025	False
orf1ab polyprotein	6024	6032	EAVGTNLPL	HLA-A68:02;HLA-B35:01;HLA-B35:03;HLA-C03:03;HLA-C03:04;HLA-C08:01;HLA-C17:01	0.400807883	0.379818234	0.463644072	False
orf1ab polyprotein	6049	6058	YVDTPNNTDF	HLA-A01:01;HLA-C03:03;HLA-C05:01;HLA-C08:02	0.455739003	0.544051117	0.208409224	False
orf1a polyprotein;orf1ab polyprotein	2086	2095	ITEEVGHTDL	HLA-A01:01;HLA-C03:03;HLA-C05:01;HLA-C08:02	0.455739003	0.544051117	0.208409224	False
orf1a polyprotein;orf1ab polyprotein	3548	3556	ALLEDEFTP	HLA-A02:01;HLA-A02:04;HLA-A32:01	0.465858804	0.547568883	0.203568695	False
ORF7a protein	48	56	PLADNKFAL	HLA-A02:01;HLA-A02:04;HLA-A32:01	0.465858804	0.547568883	0.203568695	False
orf1ab polyprotein	4966	4974	KLLKSIAAT	HLA-A02:01;HLA-A02:04;HLA-A32:01	0.465858804	0.547568883	0.203568695	False
orf1ab polyprotein	6637	6645	VVQQLPETY	HLA-A29:02;HLA-A30:02;HLA-A32:01;HLA-A36:01;HLA-B15:01;HLA-B18:01;HLA-B35:01;HLA-B57:01;HLA-C02:02	0.477850496	0.501084615	0.237122248	False
nucleocapsid phosphoprotein	249	257	KSAAEASKK	HLA-A03:01;HLA-A11:01;HLA-A30:01;HLA-A36:01;HLA-B58:01;HLA-B58:02	0.385512034	0.38707449	0.467494272	False
ORF9b protein	85	93	EELPDEFVV	HLA-B18:01;HLA-B40:01;HLA-B40:02;HLA-B41:01;HLA-B44:02;HLA-B44:03;HLA-B45:01;HLA-B49:01	0.442492722	0.47248831	0.322407614	False
orf1a polyprotein;orf1ab polyprotein	4052	4059	ARDGCVPL	HLA-B39:01;HLA-C05:01;HLA-C07:02;HLA-C08:02	0.434309975	0.49167375	0.309801823	False
orf1ab polyprotein	5282	5292	KLHDELTGHML	HLA-A02:01;HLA-A32:01	0.46510768	0.547568883	0.203568695	False
orf1ab polyprotein	6958	6967	KLALGGSVAI	HLA-A02:01;HLA-A32:01	0.46510768	0.547568883	0.203568695	False
nucleocapsid phosphoprotein	361	370	KTFPPTEPKK	HLA-A03:01;HLA-A11:01;HLA-A30:01;HLA-B57:01	0.38937697	0.427626566	0.424783516	False
orf1ab polyprotein	5058	5066	MVMCGGSLY	HLA-A01:01;HLA-A25:01;HLA-A26:01;HLA-A29:02;HLA-A30:02;HLA-A36:01;HLA-B15:01	0.459873842	0.526197125	0.232444606	False
orf1a polyprotein;orf1ab polyprotein	3622	3630	SAFAMMFVK	HLA-A03:01;HLA-A11:01;HLA-A68:01;HLA-C12:02	0.379829761	0.410420578	0.450058737	False
orf1a polyprotein;orf1ab polyprotein	621	628	YEKLKPVL	HLA-B08:01;HLA-B14:02;HLA-B18:01;HLA-B37:01;HLA-B40:01;HLA-B40:02;HLA-B49:01	0.440933479	0.503848816	0.286549484	False
orf1ab polyprotein	4899	4907	NKWGKARLY	HLA-A30:02;HLA-B15:03;HLA-C06:02;HLA-C07:02	0.423717657	0.43856268	0.378177576	False
orf1a polyprotein;orf1ab polyprotein	3700	3709	VYDDGARRVW	HLA-A24:02;HLA-B57:01;HLA-C04:01	0.402082418	0.382763011	0.458143211	False
orf1a polyprotein;orf1ab polyprotein	3654	3661	YMPASWVM	HLA-C01:02;HLA-C07:02;HLA-C14:02	0.334232011	0.345162992	0.547501618	False
membrane glycoprotein	136	145	SELVIGAVIL	HLA-B18:01;HLA-B40:01;HLA-B40:02;HLA-B44:02;HLA-B44:03;HLA-B48:01;HLA-B49:01	0.425549952	0.46153756	0.349622268	False
orf1a polyprotein;orf1ab polyprotein	2218	2226	LKSPNFSKL	HLA-B15:03;HLA-B48:01;HLA-C06:02;HLA-C07:02	0.407851641	0.428660093	0.402590644	False
orf1ab polyprotein	4979	4986	VVIGTSKF	HLA-A26:01;HLA-B15:01;HLA-B58:01;HLA-C02:02;HLA-C03:03;HLA-C05:01;HLA-C17:01	0.437642382	0.46678302	0.333725688	False
nucleocapsid phosphoprotein	352	360	LLNKHIDAY	HLA-A01:01;HLA-A29:02;HLA-A30:02;HLA-A32:01;HLA-A36:01;HLA-B15:01;HLA-B46:01	0.443398032	0.503573213	0.286634594	False
surface glycoprotein	809	817	PSKPSKRSF	HLA-B15:01;HLA-B46:01;HLA-B57:01;HLA-B57:03;HLA-B58:02;HLA-C02:02;HLA-C07:01	0.453154319	0.492564204	0.285078823	False
surface glycoprotein	625	633	HADQLTPTW	HLA-B35:01;HLA-B35:03;HLA-B53:01;HLA-B57:01;HLA-B57:03;HLA-B58:01;HLA-C05:01;HLA-C08:01;HLA-C08:02	0.426353819	0.413206484	0.399076832	False
orf1a polyprotein;orf1ab polyprotein	1414	1422	GVVDYGARF	HLA-A25:01;HLA-A26:01;HLA-A29:02;HLA-A30:02;HLA-A68:02;HLA-B15:01;HLA-B15:03;HLA-B46:01;HLA-B53:01;HLA-B57:01;HLA-B58:01;HLA-C02:02	0.449967921	0.409202969	0.380620444	False
orf1ab polyprotein	4920	4927	FAYTKRNV	HLA-B51:01;HLA-C02:02;HLA-C03:02;HLA-C06:02;HLA-C12:02;HLA-C12:03	0.399010984	0.402201179	0.434773953	False
orf1a polyprotein;orf1ab polyprotein	1571	1579	FTTVDNINL	HLA-A68:02;HLA-B57:03;HLA-C02:02;HLA-C03:03;HLA-C03:04;HLA-C08:02;HLA-C12:03	0.45477874	0.464400071	0.309858881	False
orf1a polyprotein;orf1ab polyprotein	3329	3338	FLVQAGNVQL	HLA-A02:01;HLA-A02:04;HLA-A02:07;HLA-C17:01	0.450421315	0.511029038	0.2596343	False
orf1a polyprotein;orf1ab polyprotein	3605	3613	FLYENAFLP	HLA-A02:01;HLA-A02:04;HLA-A29:02	0.474078636	0.549530831	0.18276592	False
surface glycoprotein	1196	1204	SLIDLQELG	HLA-A02:01;HLA-A02:04;HLA-A29:02	0.474078636	0.549530831	0.18276592	False
ORF10 protein	9	18	FPFTIYSLLL	HLA-B07:02;HLA-B35:01;HLA-B35:03;HLA-B51:01;HLA-B53:01;HLA-B54:01	0.435253311	0.454337084	0.343235632	False
orf1ab polyprotein	6285	6292	AYKIEELF	HLA-A24:02;HLA-C04:01;HLA-C14:02	0.387873317	0.349640458	0.492462254	False
surface glycoprotein	422	429	NYKLPDDF	HLA-A24:02;HLA-C04:01;HLA-C14:02	0.387873317	0.349640458	0.492462254	False
orf1ab polyprotein	4607	4614	NWYDFGDF	HLA-A24:02;HLA-C04:01;HLA-C14:02	0.387873317	0.349640458	0.492462254	False
orf1ab polyprotein	5016	5024	RAMPNMLRI	HLA-A23:01;HLA-B13:02;HLA-B51:01;HLA-B53:01;HLA-B57:01;HLA-B57:03;HLA-B58:01;HLA-B58:02;HLA-C12:02;HLA-C12:03;HLA-C15:02	0.407071604	0.359971877	0.465133413	False
orf1ab polyprotein	5964	5972	CVDIPGIPK	HLA-A03:01;HLA-A11:01;HLA-A30:01;HLA-C08:02	0.401955767	0.428138307	0.404986778	False
orf1a polyprotein;orf1ab polyprotein	3358	3366	NPKTPKYKF	HLA-B07:02;HLA-B08:01;HLA-B35:01;HLA-B42:01;HLA-B53:01	0.491288802	0.54503626	0.165170584	False
surface glycoprotein	1096	1103	VSNGTHWF	HLA-B15:01;HLA-B46:01;HLA-B58:01;HLA-B58:02;HLA-C02:02;HLA-C03:02;HLA-C03:03;HLA-C12:03;HLA-C17:01	0.388389666	0.375256327	0.46945401	False
ORF3a protein	223	230	TGVEHVTF	HLA-B08:01;HLA-B14:02;HLA-B15:01;HLA-B15:03;HLA-B18:01;HLA-B37:01;HLA-B53:01;HLA-B58:01	0.466648867	0.497659262	0.25609375	False
orf1ab polyprotein	4630	4637	YSLLMPIL	HLA-B51:01;HLA-C03:02;HLA-C03:03;HLA-C03:04;HLA-C08:01;HLA-C17:01	0.353483881	0.333760898	0.533795275	False
ORF3a protein	180	188	SEHDYQIGG	HLA-B18:01;HLA-B40:01;HLA-B40:02;HLA-B41:01;HLA-B44:02;HLA-B44:03;HLA-B45:01;HLA-B50:01	0.431993107	0.46470291	0.332625375	False
surface glycoprotein	618	626	TEVPVAIHA	HLA-B18:01;HLA-B40:01;HLA-B40:02;HLA-B41:01;HLA-B44:02;HLA-B44:03;HLA-B45:01;HLA-B50:01	0.431993107	0.46470291	0.332625375	False
orf1ab polyprotein	5324	5331	QAVGACVL	HLA-B58:02;HLA-C03:03;HLA-C03:04;HLA-C08:01;HLA-C12:02;HLA-C12:03;HLA-C17:01	0.372975962	0.362809546	0.491973182	False
orf1ab polyprotein	6665	6673	FLELAMDEF	HLA-A01:01;HLA-C04:01;HLA-C08:02	0.46772435	0.497523025	0.245131107	False
orf1a polyprotein;orf1ab polyprotein	4260	4267	VPANSTVL	HLA-B07:02;HLA-B14:02;HLA-B35:01;HLA-B42:01;HLA-B51:01;HLA-B55:01;HLA-B81:01	0.46225901	0.496865138	0.259075007	False
surface glycoprotein	396	404	YADSFVIRG	HLA-B35:03;HLA-B53:01;HLA-C02:02;HLA-C05:01;HLA-C08:01;HLA-C08:02;HLA-C12:02;HLA-C12:03;HLA-C17:01	0.45041279	0.432802434	0.344759106	False
surface glycoprotein	408	417	RQIAPGQTGK	HLA-A03:01;HLA-A11:01;HLA-A30:01;HLA-A74:01;HLA-B27:05	0.397977208	0.420813956	0.412117926	False
nucleocapsid phosphoprotein	79	87	SPDDQIGYY	HLA-A01:01;HLA-A26:01;HLA-A29:02;HLA-A30:02;HLA-A36:01;HLA-B35:01;HLA-B53:01	0.472233209	0.494520181	0.245415098	False
surface glycoprotein	43	51	FRSSVLHST	HLA-B39:01;HLA-C06:02;HLA-C07:02	0.398101136	0.437925234	0.393589907	False
surface glycoprotein	628	636	QLTPTWRVY	HLA-A30:02;HLA-A32:01;HLA-B15:01;HLA-B15:03;HLA-B46:01;HLA-B58:02;HLA-C07:01;HLA-C12:02	0.437495565	0.456374912	0.332770248	False
orf1a polyprotein;orf1ab polyprotein	887	895	SELLTPLGI	HLA-B37:01;HLA-B40:01;HLA-B40:02;HLA-B44:02;HLA-B44:03;HLA-B45:01;HLA-B49:01;HLA-B52:01	0.411688159	0.432719888	0.384292991	False
orf1a polyprotein;orf1ab polyprotein	2794	2802	HVMSKHTDF	HLA-A23:01;HLA-A25:01;HLA-A26:01;HLA-A29:02;HLA-B08:01;HLA-B15:01;HLA-B53:01;HLA-B57:03;HLA-C02:02	0.492784486	0.512166817	0.183839843	False
orf1ab polyprotein	5770	5778	AEIVDTVSA	HLA-B40:01;HLA-B40:02;HLA-B41:01;HLA-B44:02;HLA-B44:03;HLA-B45:01;HLA-B46:01;HLA-B49:01;HLA-B50:01	0.400217548	0.415646775	0.412814962	False
orf1a polyprotein;orf1ab polyprotein	2629	2637	VLSTFISAA	HLA-A02:01;HLA-A02:03;HLA-B55:01	0.443548396	0.521428628	0.244667005	False
membrane glycoprotein	61	70	TLACFVLAAV	HLA-A02:01;HLA-A02:03;HLA-A02:04;HLA-A68:02	0.456226271	0.51626584	0.23696281	False
surface glycoprotein	516	524	ELLHAPATV	HLA-A02:01;HLA-A02:03;HLA-A02:04;HLA-A68:02	0.456226271	0.51626584	0.23696281	False
orf1a polyprotein;orf1ab polyprotein	2121	2130	TLATHGLAAV	HLA-A02:01;HLA-A02:03;HLA-A02:04;HLA-A68:02	0.456226271	0.51626584	0.23696281	False
orf1a polyprotein;orf1ab polyprotein	1611	1618	NSHEGKTF	HLA-B15:01;HLA-B18:01;HLA-B46:01;HLA-B57:03;HLA-B58:01;HLA-B58:02;HLA-C03:02;HLA-C03:03;HLA-C12:03	0.367879678	0.376539406	0.477448673	False
orf1a polyprotein;orf1ab polyprotein	2049	2057	EEVVENPTI	HLA-B18:01;HLA-B40:01;HLA-B40:02;HLA-B44:02;HLA-B44:03;HLA-B45:01;HLA-B49:01	0.434555662	0.467026998	0.320084315	False
orf1a polyprotein;orf1ab polyprotein	4069	4077	KLMVVIPDY	HLA-A03:01;HLA-A29:02;HLA-A30:01;HLA-A30:02;HLA-A32:01;HLA-A36:01;HLA-B15:01;HLA-B46:01	0.457326387	0.483740268	0.280144617	False
orf1a polyprotein;orf1ab polyprotein	1813	1821	QYELKHGTF	HLA-A23:01;HLA-A24:02;HLA-C04:01;HLA-C14:03	0.412203286	0.357169294	0.454936707	False
nucleocapsid phosphoprotein	105	113	SPRWYFYYL	HLA-A30:01;HLA-B07:02;HLA-B35:03;HLA-B42:01;HLA-B81:01;HLA-C07:01	0.471524539	0.517829581	0.202476705	False
surface glycoprotein	444	452	KVGGNYNYL	HLA-A32:01;HLA-C02:02;HLA-C07:01;HLA-C08:01;HLA-C15:02;HLA-C17:01	0.443123023	0.442526994	0.33502859	False
surface glycoprotein	622	629	VAIHADQL	HLA-C03:02;HLA-C03:03;HLA-C03:04;HLA-C08:01;HLA-C12:03;HLA-C17:01	0.359123716	0.350089931	0.508332584	False
orf1a polyprotein;orf1ab polyprotein	857	864	CSAYTVEL	HLA-C03:02;HLA-C03:03;HLA-C03:04;HLA-C08:01;HLA-C12:03;HLA-C17:01	0.359123716	0.350089931	0.508332584	False
orf1ab polyprotein	6880	6887	TAVLRQWL	HLA-C03:02;HLA-C03:03;HLA-C03:04;HLA-C08:01;HLA-C12:03;HLA-C17:01	0.359123716	0.350089931	0.508332584	False
orf1a polyprotein;orf1ab polyprotein	838	845	SVNITFEL	HLA-B08:01;HLA-B81:01;HLA-C03:02;HLA-C07:01;HLA-C08:02	0.458675385	0.518557679	0.216537336	False
orf1a polyprotein;orf1ab polyprotein	3054	3062	AIVVTCLAY	HLA-A03:01;HLA-A29:02;HLA-A30:02;HLA-A32:01;HLA-A36:01;HLA-B15:01;HLA-B46:01;HLA-C03:02	0.434089648	0.46715466	0.330635639	False
orf1a polyprotein;orf1ab polyprotein	1354	1362	YILPSIISN	HLA-A02:04;HLA-A03:01;HLA-B46:01;HLA-C03:03;HLA-C03:04	0.402030221	0.453250346	0.37244566	False
orf1a polyprotein;orf1ab polyprotein	3838	3845	FKLNIKLL	HLA-B48:01;HLA-C06:02;HLA-C07:02	0.393672263	0.427641228	0.402248991	False
orf1ab polyprotein	4460	4469	SYFVVKRHTF	HLA-A23:01;HLA-A24:02;HLA-A29:02;HLA-A32:01;HLA-B57:01;HLA-C14:02;HLA-C14:03	0.388296914	0.374345135	0.458398948	False
orf1a polyprotein;orf1ab polyprotein	555	564	AQNSVRVLQK	HLA-A03:01;HLA-A11:01;HLA-A30:01;HLA-B13:02	0.381119662	0.413397723	0.427763391	False
orf1a polyprotein;orf1ab polyprotein	1247	1255	KFLTENLLL	HLA-A23:01;HLA-A24:02;HLA-A30:01;HLA-A32:01;HLA-B57:03;HLA-C14:02;HLA-C14:03;HLA-C15:02	0.37210564	0.318476168	0.517496067	False
membrane glycoprotein	138	145	LVIGAVIL	HLA-B35:03;HLA-B58:02;HLA-B81:01;HLA-C03:02;HLA-C03:03;HLA-C03:04;HLA-C08:01;HLA-C12:02;HLA-C17:01	0.341446736	0.306976746	0.555543284	False
orf1ab polyprotein	4724	4733	KIFVDGVPFV	HLA-A02:01;HLA-A02:04;HLA-A30:01	0.459401717	0.523140698	0.217111264	False
orf1ab polyprotein	5197	5204	LTKGPHEF	HLA-B15:01;HLA-B46:01;HLA-B57:01;HLA-B57:03;HLA-B58:02;HLA-C02:02;HLA-C03:02;HLA-C03:03;HLA-C12:03	0.389061948	0.410960117	0.420078595	False
orf1a polyprotein;orf1ab polyprotein	3713	3720	NVLTLVYK	HLA-A03:01;HLA-A11:01;HLA-A33:03	0.342098394	0.361950512	0.508963452	False
orf1ab polyprotein	6071	6079	FKHLIPLMY	HLA-A29:02;HLA-B15:03;HLA-B35:01;HLA-C03:02;HLA-C07:02	0.401734212	0.40240337	0.418483083	False
surface glycoprotein	28	36	YTNSFTRGV	HLA-A02:03;HLA-A26:01;HLA-B52:01;HLA-C02:02;HLA-C06:02;HLA-C12:03;HLA-C15:02	0.40101398	0.405484647	0.415722737	False
orf1ab polyprotein	4674	4681	LFDRYFKY	HLA-A01:01;HLA-A29:02;HLA-A36:01;HLA-C04:01	0.465875928	0.493683954	0.240862517	False
orf1ab polyprotein	5170	5178	SIKNFKSVL	HLA-A02:03;HLA-A25:01;HLA-A30:01;HLA-B08:01;HLA-B15:01;HLA-B42:01;HLA-B46:01;HLA-B81:01;HLA-C02:02;HLA-C12:02	0.413453015	0.444441629	0.361592385	False
orf1ab polyprotein	4577	4585	ALLKTVQFC	HLA-A02:01;HLA-A02:04;HLA-B13:02	0.449940572	0.530299082	0.217811424	False
envelope protein	17	25	VLLFLAFVV	HLA-A02:01;HLA-A02:04;HLA-B13:02	0.449940572	0.530299082	0.217811424	False
orf1a polyprotein;orf1ab polyprotein	561	569	VLQKAAITI	HLA-A02:01;HLA-A02:04;HLA-B13:02	0.449940572	0.530299082	0.217811424	False
orf1a polyprotein;orf1ab polyprotein	453	461	ILQKEKVNI	HLA-A02:01;HLA-A02:04;HLA-B13:02	0.449940572	0.530299082	0.217811424	False
surface glycoprotein	288	296	AVDCALDPL	HLA-A02:07;HLA-C04:01;HLA-C05:01;HLA-C08:01;HLA-C08:02	0.431467655	0.41555504	0.374573412	False
orf1a polyprotein;orf1ab polyprotein	2580	2588	VGDSAEVAV	HLA-A02:07;HLA-C04:01;HLA-C05:01;HLA-C08:01;HLA-C08:02	0.431467655	0.41555504	0.374573412	False
surface glycoprotein	944	952	ALGKLQDVV	HLA-A02:01;HLA-B13:02	0.449194683	0.530299082	0.217811424	False
orf1ab polyprotein	6618	6626	TLIGEAVKT	HLA-A02:01;HLA-B13:02	0.449194683	0.530299082	0.217811424	False
orf1ab polyprotein	5098	5107	ALLSTDGNKI	HLA-A02:01;HLA-B13:02	0.449194683	0.530299082	0.217811424	False
orf1a polyprotein;orf1ab polyprotein	4251	4260	RLQAGNATEV	HLA-A02:01;HLA-B13:02	0.449194683	0.530299082	0.217811424	False
orf1ab polyprotein	5415	5422	GLYKNTCV	HLA-A02:01;HLA-B13:02	0.449194683	0.530299082	0.217811424	False
membrane glycoprotein	89	97	GLMWLSYFI	HLA-A02:01;HLA-B13:02	0.449194683	0.530299082	0.217811424	False
orf1ab polyprotein	7077	7086	RLIIRENNRV	HLA-A02:01;HLA-B13:02	0.449194683	0.530299082	0.217811424	False
membrane glycoprotein	20	28	WNLVIGFLF	HLA-A23:01;HLA-A24:02;HLA-A29:02;HLA-B44:02;HLA-B57:01	0.413435592	0.433579075	0.374453123	False
orf1ab polyprotein	6428	6436	SAGFSLWVY	HLA-A29:02;HLA-A30:02;HLA-A36:01;HLA-B35:01;HLA-B46:01;HLA-B57:01;HLA-C02:02;HLA-C03:02;HLA-C12:02;HLA-C12:03	0.406356383	0.387779801	0.425594759	False
orf1a polyprotein;orf1ab polyprotein	2342	2349	GLAAIMQL	HLA-A02:01;HLA-A02:03;HLA-A02:04;HLA-C17:01	0.449323558	0.511029038	0.238625187	False
orf1ab polyprotein	4525	4534	HFDEGNCDTL	HLA-B38:01;HLA-C04:01;HLA-C05:01;HLA-C08:01;HLA-C08:02	0.447911362	0.440759089	0.32220419	False
orf1a polyprotein;orf1ab polyprotein	2192	2200	ASMPTTIAK	HLA-A03:01;HLA-A11:01;HLA-A30:01;HLA-B46:01	0.359074702	0.38110311	0.471330188	False
orf1ab polyprotein	6253	6261	VLHDIGNPK	HLA-A03:01;HLA-A11:01;HLA-A30:01;HLA-B46:01	0.359074702	0.38110311	0.471330188	False
ORF9b protein	80	87	KLATTEEL	HLA-A02:01;HLA-A02:03;HLA-C17:01	0.448574636	0.511029038	0.238625187	False
orf1a polyprotein;orf1ab polyprotein	4258	4267	TEVPANSTVL	HLA-B15:09;HLA-B18:01;HLA-B40:01;HLA-B40:02;HLA-B41:01;HLA-B44:02;HLA-B44:03;HLA-B49:01	0.425349312	0.466282086	0.318681824	False
orf1a polyprotein;orf1ab polyprotein	234	242	HEHEIAWYT	HLA-B18:01;HLA-B40:01;HLA-B40:02;HLA-B41:01;HLA-B44:02;HLA-B44:03;HLA-B49:01	0.425215886	0.466282086	0.318681824	False
orf1a polyprotein;orf1ab polyprotein	3489	3497	TLNDFNLVA	HLA-A02:01;HLA-A02:03;HLA-A02:04;HLA-B50:01	0.439545018	0.512406378	0.247671309	False
membrane glycoprotein	61	69	TLACFVLAA	HLA-A02:01;HLA-A02:03;HLA-A02:04;HLA-B50:01	0.439545018	0.512406378	0.247671309	False
orf1a polyprotein;orf1ab polyprotein	110	119	HVGEIPVAYR	HLA-A03:01;HLA-A26:01;HLA-A31:01;HLA-A33:03;HLA-A68:01;HLA-A68:02;HLA-A74:01	0.42643726	0.409146431	0.378646172	False
ORF9b protein	56	64	MARKTLNSL	HLA-B35:03;HLA-C01:02;HLA-C02:02;HLA-C03:02;HLA-C03:03;HLA-C12:03;HLA-C17:01	0.36548953	0.345479889	0.49678141	False
orf1a polyprotein;orf1ab polyprotein	848	856	RIDKVLNEK	HLA-A02:07;HLA-A03:01;HLA-A11:01;HLA-A30:01;HLA-A36:01	0.364454287	0.38119751	0.466121351	False
orf1a polyprotein;orf1ab polyprotein	1310	1317	TEMLAKAL	HLA-B08:01;HLA-B14:02;HLA-B18:01;HLA-B37:01;HLA-B40:02;HLA-B44:02;HLA-B49:01	0.471316937	0.55016151	0.159441088	False
orf1a polyprotein;orf1ab polyprotein	1264	1271	HPDSATLV	HLA-B35:03;HLA-B51:01;HLA-B54:01;HLA-C04:01;HLA-C05:01	0.43018885	0.431118298	0.357096302	False
orf1a polyprotein;orf1ab polyprotein	2342	2350	GLAAIMQLF	HLA-A24:02;HLA-A29:02;HLA-A32:01;HLA-B13:02;HLA-B15:01	0.37857934	0.406979688	0.42750614	False
orf1ab polyprotein	5177	5185	VLYYQNNVF	HLA-A23:01;HLA-A24:02;HLA-A29:02;HLA-A32:01;HLA-B15:01;HLA-B15:03	0.41163894	0.397721404	0.402683829	False
ORF7b	10	17	YLCFLAFL	HLA-C01:02;HLA-C03:02;HLA-C04:01;HLA-C08:02;HLA-C17:01	0.400205125	0.329959526	0.476171462	False
surface glycoprotein	125	133	NVVIKVCEF	HLA-A25:01;HLA-A26:01;HLA-B08:01;HLA-B15:01;HLA-B18:01;HLA-B53:01;HLA-C02:02	0.465831616	0.517142623	0.197571981	False
orf1a polyprotein;orf1ab polyprotein	4039	4048	KLDNDALNNI	HLA-A02:01;HLA-A02:07;HLA-A36:01	0.434933414	0.50452479	0.257542044	False
orf1a polyprotein;orf1ab polyprotein	112	121	GEIPVAYRKV	HLA-B13:02;HLA-B40:01;HLA-B40:02;HLA-B41:01;HLA-B44:02;HLA-B44:03;HLA-B49:01;HLA-B50:01	0.409160006	0.449064938	0.349622268	False
orf1a polyprotein;orf1ab polyprotein	3752	3760	MFLARGIVF	HLA-A23:01;HLA-A24:02;HLA-A29:02;HLA-B35:01;HLA-C14:02;HLA-C14:03	0.387258451	0.352443768	0.46561383	False
ORF7a protein	100	109	IFLIVAAIVF	HLA-A23:01;HLA-A24:02;HLA-A29:02;HLA-B35:01;HLA-C14:02;HLA-C14:03	0.387258451	0.352443768	0.46561383	False
orf1ab polyprotein	5612	5621	KSHFAIGLAL	HLA-C01:02;HLA-C03:03;HLA-C03:04;HLA-C15:02	0.326552781	0.335041298	0.533729534	False
ORF3a protein	45	52	WLIVGVAL	HLA-B08:01;HLA-B46:01;HLA-C03:02;HLA-C03:04;HLA-C14:02;HLA-C14:03;HLA-C17:01	0.364339099	0.382825998	0.459685334	False
orf1ab polyprotein	4558	4567	VENPDILRVY	HLA-A30:02;HLA-B15:01;HLA-B15:03;HLA-B18:01;HLA-B44:02;HLA-B44:03;HLA-B57:01	0.455931039	0.507495758	0.22192472	False
surface glycoprotein	51	59	TQDLFLPFF	HLA-B38:01;HLA-C02:02;HLA-C04:01;HLA-C05:01;HLA-C08:02	0.493066842	0.493901884	0.192087145	False
orf1ab polyprotein	4480	4488	NLLKDCPAV	HLA-A02:01;HLA-A02:04;HLA-A02:07	0.430083941	0.504440318	0.257542044	False
orf1a polyprotein;orf1ab polyprotein	2234	2243	LLLSVCLGSL	HLA-A02:01;HLA-A02:04;HLA-A02:07	0.430083941	0.504440318	0.257542044	False
orf1a polyprotein;orf1ab polyprotein	906	916	YLFDESGEFKL	HLA-A02:01;HLA-A02:04;HLA-A02:07	0.430083941	0.504440318	0.257542044	False
orf1a polyprotein;orf1ab polyprotein	20	28	VLQVRDVLV	HLA-A02:01;HLA-A02:04;HLA-A02:07	0.430083941	0.504440318	0.257542044	False
orf1a polyprotein;orf1ab polyprotein	1387	1395	KLMPVCVET	HLA-A02:01;HLA-A02:04;HLA-A02:07	0.430083941	0.504440318	0.257542044	False
orf1a polyprotein;orf1ab polyprotein	2570	2577	LLLDQALV	HLA-A02:01;HLA-A02:04;HLA-A02:07	0.430083941	0.504440318	0.257542044	False
orf1ab polyprotein	5740	5749	TLEPEYFNSV	HLA-A02:01;HLA-A02:04;HLA-A02:07	0.430083941	0.504440318	0.257542044	False
orf1a polyprotein;orf1ab polyprotein	1694	1702	ALQDAYYRA	HLA-A02:01;HLA-A02:04;HLA-A02:07	0.430083941	0.504440318	0.257542044	False
orf1ab polyprotein	6245	6254	ALLADKFPVL	HLA-A02:01;HLA-A02:04;HLA-A02:07	0.430083941	0.504440318	0.257542044	False
orf1ab polyprotein	4699	4707	ILHCANFNV	HLA-A02:01;HLA-A02:04;HLA-A02:07	0.430083941	0.504440318	0.257542044	False
orf1a polyprotein;orf1ab polyprotein	2569	2577	ILLLDQALV	HLA-A02:01;HLA-A02:04;HLA-A02:07	0.430083941	0.504440318	0.257542044	False
orf1ab polyprotein	5322	5330	VLQAVGACV	HLA-A02:01;HLA-A02:04;HLA-A02:07	0.430083941	0.504440318	0.257542044	False
ORF3a protein	114	123	FLQSINFVRI	HLA-A02:01;HLA-A02:04;HLA-A02:07	0.430083941	0.504440318	0.257542044	False
orf1ab polyprotein	5542	5550	KLNVGDYFV	HLA-A02:01;HLA-A02:04;HLA-A02:07	0.430083941	0.504440318	0.257542044	False
orf1a polyprotein;orf1ab polyprotein	3034	3041	LIQPIGAL	HLA-B08:01;HLA-C03:02;HLA-C03:03;HLA-C03:04;HLA-C17:01	0.400049096	0.440432474	0.367746032	False
orf1a polyprotein;orf1ab polyprotein	3174	3183	TFEEAALCTF	HLA-A23:01;HLA-A24:02;HLA-C04:01	0.410225929	0.356982439	0.438159135	False
envelope protein	25	34	VFLLVTLAIL	HLA-A23:01;HLA-A24:02;HLA-C04:01	0.410225929	0.356982439	0.438159135	False
orf1a polyprotein;orf1ab polyprotein	3810	3820	VYDYLVSTQEF	HLA-A23:01;HLA-A24:02;HLA-C04:01	0.410225929	0.356982439	0.438159135	False
orf1ab polyprotein	5222	5229	PYPDPSRI	HLA-A23:01;HLA-A24:02;HLA-C04:01	0.410225929	0.356982439	0.438159135	False
surface glycoprotein	558	565	KFLPFQQF	HLA-A23:01;HLA-A24:02;HLA-B15:03;HLA-B37:01;HLA-B57:01;HLA-B57:03;HLA-B58:01;HLA-B58:02;HLA-C14:02;HLA-C14:03	0.364940927	0.303262836	0.518994733	False
surface glycoprotein	362	370	VADYSVLYN	HLA-A01:01;HLA-A36:01;HLA-C05:01;HLA-C08:01;HLA-C08:02;HLA-C17:01	0.439332462	0.489048536	0.259951326	False
orf1a polyprotein;orf1ab polyprotein	874	882	VVADAVIKT	HLA-A03:01;HLA-A11:01;HLA-A68:01;HLA-A68:02	0.394280288	0.412278443	0.397622223	False
surface glycoprotein	780	790	EVFAQVKQIYK	HLA-A03:01;HLA-A11:01;HLA-A68:01;HLA-A68:02	0.394280288	0.412278443	0.397622223	False
orf1a polyprotein;orf1ab polyprotein	2294	2304	GLDSLDTYPSL	HLA-A02:01;HLA-A02:07	0.42930808	0.504440318	0.257542044	False
orf1a polyprotein;orf1ab polyprotein	3294	3302	WLDDVVYCP	HLA-A02:01;HLA-A02:07	0.42930808	0.504440318	0.257542044	False
orf1a polyprotein;orf1ab polyprotein	60	69	VLPQLEQPYV	HLA-A02:01;HLA-A02:07	0.42930808	0.504440318	0.257542044	False
orf1ab polyprotein	5686	5695	ALPETTADIV	HLA-A02:01;HLA-A02:07	0.42930808	0.504440318	0.257542044	False
orf1a polyprotein;orf1ab polyprotein	1883	1891	KLDGVVCTE	HLA-A02:01;HLA-A02:07	0.42930808	0.504440318	0.257542044	False
orf1ab polyprotein	5686	5696	ALPETTADIVV	HLA-A02:01;HLA-A02:07	0.42930808	0.504440318	0.257542044	False
orf1a polyprotein;orf1ab polyprotein	704	712	NLGETFVTH	HLA-A02:01;HLA-A02:07	0.42930808	0.504440318	0.257542044	False
orf1a polyprotein;orf1ab polyprotein	1051	1058	KVKPTVVV	HLA-A30:01;HLA-B08:01;HLA-B15:01;HLA-B42:01;HLA-B55:01;HLA-C02:02;HLA-C12:02;HLA-C15:02	0.428521123	0.467966752	0.306138728	False
orf1a polyprotein;orf1ab polyprotein	1869	1877	KENSYTTTI	HLA-A23:01;HLA-B13:02;HLA-B37:01;HLA-B40:01;HLA-B40:02;HLA-B41:01;HLA-B44:03;HLA-B45:01;HLA-B49:01;HLA-B50:01;HLA-B52:01	0.405201466	0.373570024	0.42449322	False
orf1ab polyprotein	6612	6620	ASLNGVTLI	HLA-A11:01;HLA-A32:01;HLA-B13:02;HLA-B38:01;HLA-B52:01;HLA-B57:01;HLA-B57:03;HLA-B58:02;HLA-C15:02	0.34112379	0.345772404	0.506515472	False
orf1a polyprotein;orf1ab polyprotein	3970	3977	NGDSEVVL	HLA-B15:09;HLA-B39:01;HLA-C04:01;HLA-C05:01;HLA-C08:01;HLA-C08:02	0.438593148	0.426641481	0.334094221	False
membrane glycoprotein	93	100	LSYFIASF	HLA-B15:01;HLA-B46:01;HLA-B57:01;HLA-B58:01;HLA-B58:02;HLA-C03:02;HLA-C03:03;HLA-C12:03	0.339971995	0.364895213	0.488730056	False
orf1ab polyprotein	4590	4599	NAGIVGVLTL	HLA-B35:01;HLA-B35:03;HLA-B53:01;HLA-C03:04;HLA-C08:01;HLA-C08:02;HLA-C12:02	0.385336145	0.35422254	0.46045138	False
surface glycoprotein	759	767	FCTQLNRAL	HLA-B35:03;HLA-C03:03;HLA-C03:04;HLA-C06:02	0.386959872	0.425086236	0.388782089	False
surface glycoprotein	968	976	SNFGAISSV	HLA-A02:03;HLA-A02:04;HLA-A68:02;HLA-B15:09;HLA-B55:01;HLA-C02:02;HLA-C06:02;HLA-C12:02;HLA-C12:03;HLA-C15:02	0.404816567	0.403184438	0.393221218	False
orf1a polyprotein;orf1ab polyprotein	2624	2633	VSLDNVLSTF	HLA-A23:01;HLA-A24:02;HLA-A32:01;HLA-B57:01;HLA-B57:03;HLA-B58:01;HLA-C03:02	0.354599759	0.317271151	0.513143026	False
membrane glycoprotein	19	28	QWNLVIGFLF	HLA-A23:01;HLA-A24:02;HLA-B44:02;HLA-B44:03	0.399749682	0.405480297	0.400108281	False
orf1a polyprotein;orf1ab polyprotein	912	920	GEFKLASHM	HLA-B18:01;HLA-B40:01;HLA-B40:02;HLA-B44:02;HLA-B44:03;HLA-B49:01	0.417157213	0.460788824	0.316352151	False
ORF7a protein	94	102	QELYSPIFL	HLA-B18:01;HLA-B40:01;HLA-B40:02;HLA-B44:02;HLA-B44:03;HLA-B49:01	0.417157213	0.460788824	0.316352151	False
surface glycoprotein	987	996	VEAEVQIDRL	HLA-B18:01;HLA-B40:01;HLA-B40:02;HLA-B44:02;HLA-B44:03;HLA-B49:01	0.417157213	0.460788824	0.316352151	False
orf1ab polyprotein	6692	6700	FSHSQLGGL	HLA-C01:02;HLA-C02:02;HLA-C03:03;HLA-C03:04	0.360792267	0.365157567	0.469214898	False
orf1ab polyprotein	4655	4663	KPYIKWDLL	HLA-B07:02;HLA-B08:01;HLA-B42:01;HLA-B51:01;HLA-B81:01	0.448575553	0.524672486	0.20147904	False
orf1a polyprotein;orf1ab polyprotein	1809	1816	APPAQYEL	HLA-B07:02;HLA-B42:01;HLA-B81:01;HLA-C07:02	0.416819247	0.465552896	0.309129913	False
orf1ab polyprotein	6064	6071	KPPPGDQF	HLA-B07:02;HLA-B42:01;HLA-B81:01;HLA-C07:02	0.416819247	0.465552896	0.309129913	False
orf1a polyprotein;orf1ab polyprotein	1682	1690	TLQQIELKF	HLA-A23:01;HLA-A24:02;HLA-A29:02;HLA-A32:01;HLA-B15:01	0.396875351	0.396571284	0.402337121	False
surface glycoprotein	506	515	QPYRVVVLSF	HLA-B07:02;HLA-B35:01;HLA-B35:03;HLA-B42:01;HLA-B51:01;HLA-B53:01	0.444355613	0.454337084	0.288963167	False
orf1a polyprotein;orf1ab polyprotein	4355	4363	TCANDPVGF	HLA-A24:02;HLA-B15:01;HLA-B15:09;HLA-B35:01;HLA-B38:01	0.369136297	0.391123289	0.436710569	False
orf1a polyprotein;orf1ab polyprotein	1917	1925	NQPYPNASF	HLA-A24:02;HLA-B15:01;HLA-B15:03;HLA-C01:02	0.325973642	0.316593262	0.532940592	False
orf1ab polyprotein	5825	5833	TRNPAWRKA	HLA-B27:05;HLA-B55:01;HLA-C06:02;HLA-C07:01	0.445336343	0.505066125	0.219508775	False
orf1a polyprotein;orf1ab polyprotein	2948	2955	LRPDTRYV	HLA-C06:02;HLA-C07:02	0.386926785	0.427056975	0.377131792	False
orf1a polyprotein;orf1ab polyprotein	3393	3401	MRPNFTIKG	HLA-C06:02;HLA-C07:02	0.386926785	0.427056975	0.377131792	False
orf1a polyprotein;orf1ab polyprotein	1979	1986	FKKGAKLL	HLA-C06:02;HLA-C07:02	0.386926785	0.427056975	0.377131792	False
orf1a polyprotein;orf1ab polyprotein	3869	3876	SVVLLSVL	HLA-B08:01;HLA-B14:02;HLA-B81:01;HLA-C03:02;HLA-C03:03;HLA-C08:01;HLA-C08:02;HLA-C17:01	0.405718467	0.425214852	0.370725104	False
orf1a polyprotein;orf1ab polyprotein	3800	3808	LNRYFRLTL	HLA-B07:02;HLA-C07:01;HLA-C15:02	0.441821941	0.508819755	0.212500027	False
orf1ab polyprotein	5023	5032	RIMASLVLAR	HLA-A03:01;HLA-A11:01;HLA-A31:01;HLA-A74:01	0.373509498	0.396985628	0.420209126	False
nucleocapsid phosphoprotein	218	226	ALALLLLDR	HLA-A03:01;HLA-A11:01;HLA-A31:01;HLA-A74:01	0.373509498	0.396985628	0.420209126	False
orf1ab polyprotein	4734	4743	VSTGYHFREL	HLA-B58:02;HLA-C03:02;HLA-C03:03;HLA-C03:04;HLA-C12:03;HLA-C15:02	0.355169833	0.369179101	0.463018816	False
surface glycoprotein	1016	1024	AEIRASANL	HLA-B37:01;HLA-B40:01;HLA-B40:02;HLA-B41:01;HLA-B44:02;HLA-B44:03;HLA-B45:01;HLA-B49:01;HLA-B50:01	0.410956905	0.436059078	0.339534964	False
orf1a polyprotein;orf1ab polyprotein	538	547	SEAARVVRSI	HLA-B37:01;HLA-B40:01;HLA-B40:02;HLA-B41:01;HLA-B44:02;HLA-B44:03;HLA-B45:01;HLA-B49:01;HLA-B50:01	0.410956905	0.436059078	0.339534964	False
orf1a polyprotein;orf1ab polyprotein	2961	2969	IIQFPNTYL	HLA-B15:09;HLA-C03:03;HLA-C03:04;HLA-C05:01;HLA-C08:02;HLA-C17:01	0.434027616	0.47219775	0.273380144	False
orf1a polyprotein;orf1ab polyprotein	2254	2262	MSNLGMPSY	HLA-A01:01;HLA-A30:02;HLA-A36:01;HLA-B46:01;HLA-B57:01;HLA-C03:02;HLA-C12:03	0.390621614	0.440701275	0.363118514	False
envelope protein	25	33	VFLLVTLAI	HLA-A23:01;HLA-A24:02;HLA-B51:01;HLA-B52:01;HLA-C14:02;HLA-C14:03	0.342304639	0.299234435	0.525593111	False
ORF3a protein	39	46	ASLPFGWL	HLA-B58:02;HLA-C03:02;HLA-C03:03;HLA-C03:04;HLA-C08:01;HLA-C15:02;HLA-C17:01	0.333667458	0.300385171	0.53909479	False
surface glycoprotein	79	86	FDNPVLPF	HLA-B37:01;HLA-B46:01;HLA-C03:02;HLA-C07:02;HLA-C14:02;HLA-C14:03	0.309408253	0.318421576	0.537129009	False
orf1a polyprotein;orf1ab polyprotein	1019	1028	VVQTIEVNSF	HLA-A24:02;HLA-A25:01;HLA-A32:01;HLA-B15:01;HLA-B57:01	0.360391001	0.403843124	0.423195783	False
orf1a polyprotein;orf1ab polyprotein	3100	3109	FLPGVYSVIY	HLA-A29:02;HLA-B15:01;HLA-B46:01;HLA-C07:02	0.370311044	0.411143439	0.405008682	False
orf1a polyprotein;orf1ab polyprotein	945	953	TQYEYGTED	HLA-B13:02;HLA-B15:01;HLA-B15:03;HLA-B46:01;HLA-B52:01;HLA-C07:01	0.405915182	0.441713033	0.342356791	False
orf1a polyprotein;orf1ab polyprotein	445	454	GLNDNLLEIL	HLA-A02:01;HLA-A02:03;HLA-A02:04	0.428945561	0.504440318	0.23647356	False
orf1ab polyprotein	7041	7052	SLFDMSKFPLKL	HLA-A02:01;HLA-A02:03;HLA-A02:04	0.428945561	0.504440318	0.23647356	False
orf1a polyprotein;orf1ab polyprotein	3289	3298	TLNGLWLDDV	HLA-A02:01;HLA-A02:03;HLA-A02:04	0.428945561	0.504440318	0.23647356	False
orf1a polyprotein;orf1ab polyprotein	1148	1156	LLSAGIFGA	HLA-A02:01;HLA-A02:03;HLA-A02:04	0.428945561	0.504440318	0.23647356	False
orf1ab polyprotein	6101	6110	NLSDRVVFVL	HLA-A02:01;HLA-A02:03;HLA-A02:04	0.428945561	0.504440318	0.23647356	False
orf1a polyprotein;orf1ab polyprotein	1714	1722	ILAYCNKTV	HLA-A02:01;HLA-A02:03;HLA-A02:04	0.428945561	0.504440318	0.23647356	False
orf1ab polyprotein	5923	5932	TLQAENVTGL	HLA-A02:01;HLA-A02:03;HLA-A02:04	0.428945561	0.504440318	0.23647356	False
surface glycoprotein	512	520	VLSFELLHA	HLA-A02:01;HLA-A02:03;HLA-A02:04	0.428945561	0.504440318	0.23647356	False
ORF3a protein	114	121	FLQSINFV	HLA-A02:01;HLA-A02:03;HLA-A02:04	0.428945561	0.504440318	0.23647356	False
orf1a polyprotein;orf1ab polyprotein	2881	2888	FLHFLPRV	HLA-A02:01;HLA-A02:03;HLA-A02:04	0.428945561	0.504440318	0.23647356	False
orf1a polyprotein;orf1ab polyprotein	801	808	ALAPNMMV	HLA-A02:01;HLA-A02:03;HLA-A02:04	0.428945561	0.504440318	0.23647356	False
orf1a polyprotein;orf1ab polyprotein	383	393	SLAEYHNESGL	HLA-A02:01;HLA-A02:03;HLA-A02:04	0.428945561	0.504440318	0.23647356	False
orf1a polyprotein;orf1ab polyprotein	1109	1118	NLAKHCLHVV	HLA-A02:01;HLA-A02:03;HLA-A02:04	0.428945561	0.504440318	0.23647356	False
orf1a polyprotein;orf1ab polyprotein	1161	1169	SLRVCVDTV	HLA-A02:01;HLA-A02:03;HLA-A02:04	0.428945561	0.504440318	0.23647356	False
orf1a polyprotein;orf1ab polyprotein	8	16	FNEKTHVQL	HLA-B35:03;HLA-B38:01;HLA-C04:01;HLA-C05:01;HLA-C08:02;HLA-C17:01	0.474265347	0.467811437	0.226318499	False
orf1a polyprotein;orf1ab polyprotein	279	287	SIIKTIQPR	HLA-A11:01;HLA-A26:01;HLA-A31:01;HLA-A33:03;HLA-A68:01;HLA-A74:01	0.304546078	0.253210211	0.59611433	False
orf1ab polyprotein	6193	6203	HVASCDAIMTR	HLA-A11:01;HLA-A26:01;HLA-A31:01;HLA-A33:03;HLA-A68:01;HLA-A74:01	0.304546078	0.253210211	0.59611433	False
orf1a polyprotein;orf1ab polyprotein	2424	2432	TTIVNGVRR	HLA-A11:01;HLA-A26:01;HLA-A31:01;HLA-A33:03;HLA-A68:01;HLA-A74:01	0.304546078	0.253210211	0.59611433	False
nucleocapsid phosphoprotein	322	330	MEVTPSGTW	HLA-B18:01;HLA-B40:01;HLA-B44:02;HLA-B44:03;HLA-B49:01;HLA-B50:01;HLA-B53:01	0.435072742	0.462842932	0.278893328	False
orf1a polyprotein;orf1ab polyprotein	1374	1382	NLREMLAHA	HLA-A02:01;HLA-A02:03	0.428168925	0.504440318	0.23647356	False
orf1a polyprotein;orf1ab polyprotein	1278	1287	FLKKDAPYIV	HLA-A02:01;HLA-A02:03	0.428168925	0.504440318	0.23647356	False
orf1a polyprotein;orf1ab polyprotein	1278	1286	FLKKDAPYI	HLA-A02:01;HLA-A02:03	0.428168925	0.504440318	0.23647356	False
orf1a polyprotein;orf1ab polyprotein	4138	4147	KLQNNELSPV	HLA-A02:01;HLA-A02:03	0.428168925	0.504440318	0.23647356	False
ORF7a protein	6	14	FLALITLAT	HLA-A02:01;HLA-A02:03	0.428168925	0.504440318	0.23647356	False
orf1a polyprotein;orf1ab polyprotein	4121	4130	NLAWPLIVTA	HLA-A02:01;HLA-A02:03	0.428168925	0.504440318	0.23647356	False
orf1ab polyprotein	4918	4927	ALFAYTKRNV	HLA-A02:01;HLA-A02:03	0.428168925	0.504440318	0.23647356	False
orf1ab polyprotein	4569	4577	NLGERVRQA	HLA-A02:01;HLA-A02:03	0.428168925	0.504440318	0.23647356	False
orf1a polyprotein;orf1ab polyprotein	3899	3907	LLAKDTTEA	HLA-A02:01;HLA-A02:03	0.428168925	0.504440318	0.23647356	False
orf1a polyprotein;orf1ab polyprotein	3861	3870	KMSDVKCTSV	HLA-A02:01;HLA-A02:03	0.428168925	0.504440318	0.23647356	False
orf1a polyprotein;orf1ab polyprotein	383	391	SLAEYHNES	HLA-A02:01;HLA-A02:03	0.428168925	0.504440318	0.23647356	False
orf1a polyprotein;orf1ab polyprotein	3605	3615	FLYENAFLPFA	HLA-A02:01;HLA-A02:03	0.428168925	0.504440318	0.23647356	False
surface glycoprotein	1223	1231	GLIAIVMVT	HLA-A02:01;HLA-A02:03	0.428168925	0.504440318	0.23647356	False
orf1a polyprotein;orf1ab polyprotein	814	823	TLKGGAPTKV	HLA-A02:01;HLA-A02:03	0.428168925	0.504440318	0.23647356	False
orf1ab polyprotein	5618	5626	GLALYYPSA	HLA-A02:01;HLA-A02:03	0.428168925	0.504440318	0.23647356	False
ORF8 protein	108	117	FLEYHDVRVV	HLA-A02:01;HLA-A02:03	0.428168925	0.504440318	0.23647356	False
ORF8 protein	3	13	FLVFLGIITTV	HLA-A02:01;HLA-A02:03	0.428168925	0.504440318	0.23647356	False
orf1ab polyprotein	5455	5464	KLFAAETLKA	HLA-A02:01;HLA-A02:03	0.428168925	0.504440318	0.23647356	False
ORF8 protein	6	14	FLGIITTVA	HLA-A02:01;HLA-A02:03	0.428168925	0.504440318	0.23647356	False
orf1a polyprotein;orf1ab polyprotein	1333	1342	GLNGYTVEEA	HLA-A02:01;HLA-A02:03	0.428168925	0.504440318	0.23647356	False
orf1ab polyprotein	6098	6106	TLKNLSDRV	HLA-A02:01;HLA-A02:03	0.428168925	0.504440318	0.23647356	False
orf1a polyprotein;orf1ab polyprotein	1527	1535	FLKRGDKSV	HLA-A02:01;HLA-A02:03	0.428168925	0.504440318	0.23647356	False
orf1a polyprotein;orf1ab polyprotein	801	809	ALAPNMMVT	HLA-A02:01;HLA-A02:03	0.428168925	0.504440318	0.23647356	False
membrane glycoprotein	56	63	LLWPVTLA	HLA-A02:01;HLA-A02:03	0.428168925	0.504440318	0.23647356	False
orf1ab polyprotein	5092	5099	VTANVNAL	HLA-C03:02;HLA-C03:03;HLA-C03:04;HLA-C08:01;HLA-C12:03	0.329972623	0.339291134	0.50635324	False
orf1a polyprotein;orf1ab polyprotein	3729	3736	QAISMWAL	HLA-C03:02;HLA-C03:03;HLA-C03:04;HLA-C08:01;HLA-C12:03	0.329972623	0.339291134	0.50635324	False
orf1a polyprotein;orf1ab polyprotein	1195	1203	SEKQVEQKI	HLA-B13:02;HLA-B40:01;HLA-B40:02;HLA-B44:02;HLA-B44:03;HLA-B45:01;HLA-B49:01	0.404324158	0.437784964	0.339079779	False
orf1a polyprotein;orf1ab polyprotein	3940	3948	TLQAIASEF	HLA-A24:02;HLA-A29:02;HLA-A30:02;HLA-A32:01;HLA-B15:01;HLA-C14:03	0.380156419	0.385615027	0.41628421	False
ORF7b	2	10	IELSLIDFY	HLA-A29:02;HLA-A30:02;HLA-B18:01;HLA-B40:01;HLA-B44:02;HLA-B44:03	0.428730753	0.473200512	0.265844552	False
orf1ab polyprotein	5471	5478	LSYGIATV	HLA-B46:01;HLA-B51:01;HLA-B52:01;HLA-C02:02;HLA-C03:02;HLA-C12:02;HLA-C12:03;HLA-C15:02	0.32937227	0.301599284	0.528997447	False
orf1a polyprotein;orf1ab polyprotein	1498	1507	EEHFIETISL	HLA-B18:01;HLA-B40:01;HLA-B40:02;HLA-B44:02;HLA-B44:03;HLA-B45:01	0.409741816	0.447267228	0.31821951	False
surface glycoprotein	938	945	LSSTASAL	HLA-B58:02;HLA-C01:02;HLA-C03:02;HLA-C03:03;HLA-C03:04	0.313121321	0.306860424	0.542929355	False
orf1a polyprotein;orf1ab polyprotein	1668	1676	KWADNNCYL	HLA-A23:01;HLA-A24:02;HLA-B40:01;HLA-B48:01;HLA-C15:02	0.334533958	0.311872841	0.513841639	False
surface glycoprotein	311	319	GIYQTSNFR	HLA-A03:01;HLA-A11:01;HLA-A68:01;HLA-A74:01	0.378789375	0.399344	0.398940922	False
orf1ab polyprotein	6478	6486	IINNTVYTK	HLA-A03:01;HLA-A11:01;HLA-A68:01;HLA-A74:01	0.378789375	0.399344	0.398940922	False
orf1a polyprotein;orf1ab polyprotein	3468	3476	LAWLYAAVI	HLA-B35:01;HLA-B51:01;HLA-B54:01;HLA-C03:02;HLA-C08:01;HLA-C08:02;HLA-C12:03	0.350507503	0.331876501	0.485594307	False
orf1a polyprotein;orf1ab polyprotein	674	684	SVQTFFKLVNK	HLA-A03:01;HLA-A11:01;HLA-A31:01	0.360170181	0.39689244	0.418486995	False
orf1ab polyprotein	5215	5223	GDDYVYLPY	HLA-A01:01;HLA-A36:01;HLA-C07:01	0.44467111	0.523651423	0.167856622	False
orf1ab polyprotein	6338	6346	GCDGGSLYV	HLA-A02:01;HLA-A36:01;HLA-B49:01	0.448891822	0.517724335	0.182066292	False
orf1ab polyprotein	4399	4408	FLNRVCGVSA	HLA-A02:01;HLA-B54:01	0.427418361	0.504440318	0.233142302	False
surface glycoprotein	367	374	VLYNSASF	HLA-B15:01;HLA-B15:03;HLA-B46:01;HLA-C03:02;HLA-C04:01;HLA-C14:02;HLA-C14:03	0.367236066	0.324109276	0.475813768	False
orf1ab polyprotein	4820	4827	FFKEGSSV	HLA-B08:01;HLA-B46:01;HLA-C04:01;HLA-C14:02;HLA-C14:03	0.396792981	0.403351134	0.374290484	False
surface glycoprotein	1220	1230	FIAGLIAIVMV	HLA-A02:01;HLA-A68:02	0.452184002	0.51626584	0.18072158	False
orf1ab polyprotein	5477	5485	TVREVLSDR	HLA-A03:01;HLA-A26:01;HLA-A31:01;HLA-A33:03;HLA-A68:01;HLA-A74:01	0.39842829	0.396084506	0.378204668	False
orf1a polyprotein;orf1ab polyprotein	3707	3715	RVWTLMNVL	HLA-A30:01;HLA-A32:01;HLA-B42:01;HLA-B48:01;HLA-B57:03;HLA-B81:01;HLA-C07:01;HLA-C08:02;HLA-C15:02	0.448496382	0.451328305	0.263234255	False
membrane glycoprotein	50	57	KLIFLWLL	HLA-A02:01;HLA-A02:04;HLA-B58:02;HLA-C17:01	0.453029975	0.511087712	0.182524789	False
ORF3a protein	2	10	DLFMRIFTI	HLA-A02:03;HLA-A02:04;HLA-A25:01;HLA-A32:01;HLA-A68:02;HLA-B08:01;HLA-B13:02;HLA-B14:02;HLA-B51:01	0.421208822	0.472410502	0.267782983	False
orf1ab polyprotein	5557	5565	MPLSAPTLV	HLA-B07:02;HLA-B35:01;HLA-B51:01;HLA-B54:01;HLA-B55:01	0.404042016	0.452000327	0.311216195	False
orf1a polyprotein;orf1ab polyprotein	2660	2668	QSDIEVTGD	HLA-A01:01;HLA-C07:01	0.43988316	0.523582396	0.167856622	False
ORF7a protein	10	18	ITLATCELY	HLA-A01:01;HLA-A29:02;HLA-A30:02;HLA-A32:01;HLA-A36:01;HLA-B57:01;HLA-B58:01	0.428844667	0.478241532	0.25868617	False
orf1a polyprotein;orf1ab polyprotein	4132	4139	RANSAVKL	HLA-B42:01;HLA-B48:01;HLA-B57:03;HLA-B58:01;HLA-B58:02;HLA-B81:01;HLA-C02:02;HLA-C05:01;HLA-C12:02;HLA-C12:03;HLA-C15:02;HLA-C17:01	0.421348126	0.386274817	0.366298448	False
orf1ab polyprotein	7035	7043	IQLSSYSLF	HLA-A23:01;HLA-A24:02;HLA-A32:01;HLA-B15:01;HLA-B15:03;HLA-B38:01	0.387158523	0.379388922	0.406193943	False
orf1a polyprotein;orf1ab polyprotein	1020	1028	VQTIEVNSF	HLA-A23:01;HLA-A24:02;HLA-A32:01;HLA-B15:01;HLA-B15:03;HLA-B38:01	0.387158523	0.379388922	0.406193943	False
[truncated: 9,898 more rows]
