# Supplementary material for: Sequence-based prediction of SARS-CoV-2 vaccine targets using a mass spectrometry-based bioinformatics predictor identifies immunogenic T cell epitopes
Source: Genome Med. 2020 Aug 13;12:70. doi: 10.1186/s13073-020-00767-w (PMC7425796; doi:10.1186/s13073-020-00767-w)
Supplement: Supplementary file 6 — Additional file 6: Table S6. SARS-CoV-2 25mers Ranked by HLA-II Population Coverage. Table of all SARS-CoV-2-derived 25mers containing at least 3 predicted HLA-II binders as subsequences. (CSV 1268 kb) [file 13073_2020_767_MOESM6_ESM.csv]

protein	start	end	peptide	alleles	USA_coverage	EUR_coverage	API_coverage
orf1ab polyprotein	5735	5759	LLTKGTLEPEYFNSVCRLMKTIGPD	DPB1-0401_DPA1-0103;DQB1-0602_DQA1-0102;DRB1_1101;DRB5_0101;DQB1-0303_DQA1-0301;DRB1_1402;DPB1-0402_DPA1-0103;DRB1_1104;DRB1_0802;DPB1-0201_DPA1-0103;DQB1-0301_DQA1-0505;DQB1-0202_DQA1-0201	0.975987088	0.975291847	0.719442237
orf1ab polyprotein	5737	5761	TKGTLEPEYFNSVCRLMKTIGPDMF	DPB1-0401_DPA1-0103;DQB1-0602_DQA1-0102;DRB1_1101;DRB5_0101;DQB1-0303_DQA1-0301;DRB1_1402;DPB1-0402_DPA1-0103;DRB1_1104;DRB1_0802;DPB1-0201_DPA1-0103;DQB1-0301_DQA1-0505;DQB1-0202_DQA1-0201	0.975987088	0.975291847	0.719442237
surface glycoprotein	791	815	TPPIKDFGGFNFSQILPDPSKPSKR	DPB1-0101_DPA1-0202;DPB1-0401_DPA1-0103;DQB1-0602_DQA1-0102;DQB1-0303_DQA1-0201;DQB1-0302_DQA1-0301;DRB1_0401;DRB1_0404;DRB1_0901;DRB1_0411;DRB1_1303;DRB1_1001;DRB1_0405;DPB1-0402_DPA1-0103;DRB3_0101;DPB1-0201_DPA1-0103	0.973834913	0.972746354	0.757235018
orf1a polyprotein	3809	3833	GVYDYLVSTQEFRYMNSQGLLPPKN	DQB1-0201_DQA1-0501;DRB1_1101;DRB1_0803;DRB1_1601;DRB3_0202;DRB1_0407;DRB5_0101;DRB1_0102;DRB1_1501;DRB1_1502;DRB1_0401;DRB1_1402;DRB1_0701;DRB1_0802;DRB1_0101;DRB1_1503;DRB1_1602;DRB1_0901;DRB5_0102;DRB1_0405;DRB1_1001;DQB1-0202_DQA1-0201	0.955855186	0.958993719	0.865196942
orf1ab polyprotein	3809	3833	GVYDYLVSTQEFRYMNSQGLLPPKN	DQB1-0201_DQA1-0501;DRB1_1101;DRB1_0803;DRB1_1601;DRB3_0202;DRB1_0407;DRB5_0101;DRB1_0102;DRB1_1501;DRB1_1502;DRB1_0401;DRB1_1402;DRB1_0701;DRB1_0802;DRB1_0101;DRB1_1503;DRB1_1602;DRB1_0901;DRB5_0102;DRB1_0405;DRB1_1001;DQB1-0202_DQA1-0201	0.955855186	0.958993719	0.865196942
orf1ab polyprotein	5235	5259	FVDDIVKTDGTLMIERFVSLAIDAY	DPB1-0401_DPA1-0103;DRB1_0301;DRB1_1405;DPB1-0301_DPA1-0103;DPB1-0402_DPA1-0103;DRB1_0701;DRB1_1404;DRB3_0301;DPB1-0201_DPA1-0103;DQB1-0202_DQA1-0201;DPB1-0601_DPA1-0103	0.981117001	0.982802248	0.679572171
orf1ab polyprotein	3810	3834	VYDYLVSTQEFRYMNSQGLLPPKNS	DQB1-0201_DQA1-0501;DRB1_1101;DRB1_0803;DRB1_1601;DRB3_0202;DRB1_0407;DRB5_0101;DRB1_0102;DRB1_1501;DRB1_1502;DRB1_0401;DRB1_1402;DRB1_0701;DRB1_0802;DRB1_0101;DRB1_1503;DRB1_1602;DRB1_0901;DRB5_0102;DRB1_1001;DQB1-0202_DQA1-0201	0.953568888	0.95825564	0.822401273
orf1a polyprotein	3810	3834	VYDYLVSTQEFRYMNSQGLLPPKNS	DQB1-0201_DQA1-0501;DRB1_1101;DRB1_0803;DRB1_1601;DRB3_0202;DRB1_0407;DRB5_0101;DRB1_0102;DRB1_1501;DRB1_1502;DRB1_0401;DRB1_1402;DRB1_0701;DRB1_0802;DRB1_0101;DRB1_1503;DRB1_1602;DRB1_0901;DRB5_0102;DRB1_1001;DQB1-0202_DQA1-0201	0.953568888	0.95825564	0.822401273
orf1ab polyprotein	3811	3835	YDYLVSTQEFRYMNSQGLLPPKNSI	DQB1-0201_DQA1-0501;DRB1_1101;DRB1_0803;DRB1_1601;DRB3_0202;DRB1_0407;DRB5_0101;DRB1_0102;DRB1_1501;DRB1_1502;DRB1_0401;DRB1_1402;DRB1_0701;DRB1_0802;DRB1_0101;DRB1_1503;DRB1_1602;DRB1_0901;DRB5_0102;DRB1_1001;DQB1-0202_DQA1-0201	0.953568888	0.95825564	0.822401273
orf1a polyprotein	3811	3835	YDYLVSTQEFRYMNSQGLLPPKNSI	DQB1-0201_DQA1-0501;DRB1_1101;DRB1_0803;DRB1_1601;DRB3_0202;DRB1_0407;DRB5_0101;DRB1_0102;DRB1_1501;DRB1_1502;DRB1_0401;DRB1_1402;DRB1_0701;DRB1_0802;DRB1_0101;DRB1_1503;DRB1_1602;DRB1_0901;DRB5_0102;DRB1_1001;DQB1-0202_DQA1-0201	0.953568888	0.95825564	0.822401273
orf1ab polyprotein	6708	6732	KRFKESPFELEDFIPMDSTVKNYFI	DPB1-0401_DPA1-0103;DRB1_1602;DPB1-0101_DPA1-0103;DPB1-0501_DPA1-0202;DRB5_0102;DRB5_0101;DRB1_1402;DPB1-0402_DPA1-0103;DPB1-0201_DPA1-0103	0.934886137	0.933444682	0.905870244
orf1ab polyprotein	6706	6730	LAKRFKESPFELEDFIPMDSTVKNY	DPB1-0401_DPA1-0103;DRB1_1602;DPB1-0101_DPA1-0103;DPB1-0501_DPA1-0202;DRB5_0102;DRB5_0101;DRB1_1402;DPB1-0402_DPA1-0103;DPB1-0201_DPA1-0103	0.934886137	0.933444682	0.905870244
orf1ab polyprotein	6712	6736	ESPFELEDFIPMDSTVKNYFITDAQ	DPB1-0401_DPA1-0103;DRB1_1602;DPB1-0501_DPA1-0202;DRB5_0102;DRB5_0101;DRB1_1402;DPB1-0402_DPA1-0103;DPB1-0201_DPA1-0103	0.934886137	0.933444682	0.905870244
orf1ab polyprotein	6711	6735	KESPFELEDFIPMDSTVKNYFITDA	DPB1-0401_DPA1-0103;DRB1_1602;DPB1-0501_DPA1-0202;DRB5_0102;DRB5_0101;DRB1_1402;DPB1-0402_DPA1-0103;DPB1-0201_DPA1-0103	0.934886137	0.933444682	0.905870244
orf1ab polyprotein	6709	6733	RFKESPFELEDFIPMDSTVKNYFIT	DPB1-0401_DPA1-0103;DRB1_1602;DPB1-0501_DPA1-0202;DRB5_0102;DRB5_0101;DRB1_1402;DPB1-0402_DPA1-0103;DPB1-0201_DPA1-0103	0.934886137	0.933444682	0.905870244
orf1ab polyprotein	6707	6731	AKRFKESPFELEDFIPMDSTVKNYF	DPB1-0401_DPA1-0103;DRB1_1602;DPB1-0101_DPA1-0103;DPB1-0501_DPA1-0202;DRB5_0102;DRB5_0101;DRB1_1402;DPB1-0402_DPA1-0103;DPB1-0201_DPA1-0103	0.934886137	0.933444682	0.905870244
orf1ab polyprotein	6710	6734	FKESPFELEDFIPMDSTVKNYFITD	DPB1-0401_DPA1-0103;DRB1_1602;DPB1-0501_DPA1-0202;DRB5_0102;DRB5_0101;DRB1_1402;DPB1-0402_DPA1-0103;DPB1-0201_DPA1-0103	0.934886137	0.933444682	0.905870244
orf1ab polyprotein	6713	6737	SPFELEDFIPMDSTVKNYFITDAQT	DPB1-0401_DPA1-0103;DRB1_1602;DPB1-0501_DPA1-0202;DRB5_0102;DRB5_0101;DRB1_1402;DPB1-0402_DPA1-0103;DPB1-0201_DPA1-0103	0.934886137	0.933444682	0.905870244
orf1ab polyprotein	5498	5522	PPLNRNYVFTGYRVTKNSKVQIGEY	DPB1-0401_DPA1-0103;DRB1_1602;DRB1_1502;DPB1-0202_DPA1-0103;DRB1_1601;DRB3_0202;DRB1_0407;DQB1-0601_DQA1-0103;DRB1_0405;DPB1-0402_DPA1-0103;DRB1_0701;DRB1_1401;DRB1_0101;DPB1-0201_DPA1-0103	0.960203551	0.961806223	0.784392385
orf1ab polyprotein	5497	5521	RPPLNRNYVFTGYRVTKNSKVQIGE	DPB1-0401_DPA1-0103;DRB1_1602;DRB1_1502;DPB1-0202_DPA1-0103;DRB1_1601;DRB3_0202;DRB1_0407;DQB1-0601_DQA1-0103;DRB1_0405;DPB1-0402_DPA1-0103;DRB1_0701;DRB1_1401;DRB1_0101;DPB1-0201_DPA1-0103	0.960203551	0.961806223	0.784392385
orf1ab polyprotein	5736	5760	LTKGTLEPEYFNSVCRLMKTIGPDM	DPB1-0401_DPA1-0103;DQB1-0602_DQA1-0102;DRB1_1101;DRB5_0101;DQB1-0303_DQA1-0301;DRB1_1402;DPB1-0402_DPA1-0103;DRB1_1104;DRB1_0802;DPB1-0201_DPA1-0103;DQB1-0301_DQA1-0505	0.966034455	0.965051058	0.719442237
orf1ab polyprotein	5236	5260	VDDIVKTDGTLMIERFVSLAIDAYP	DPB1-0401_DPA1-0103;DRB1_1405;DPB1-0301_DPA1-0103;DPB1-0402_DPA1-0103;DRB1_0701;DRB1_1404;DRB3_0301;DPB1-0201_DPA1-0103;DQB1-0202_DQA1-0201;DPB1-0601_DPA1-0103	0.975520579	0.976206074	0.636549572
orf1ab polyprotein	3813	3837	YLVSTQEFRYMNSQGLLPPKNSIDA	DQB1-0201_DQA1-0501;DRB1_1503;DRB1_1602;DRB1_1502;DRB1_0901;DRB3_0202;DRB1_0401;DRB1_1101;DRB1_0407;DRB1_1601;DRB5_0102;DRB5_0101;DRB1_1402;DRB1_0102;DRB1_0701;DRB1_0803;DRB1_1501;DRB1_0101;DRB1_1001;DRB1_0802	0.937818232	0.944094855	0.822401273
orf1a polyprotein	3814	3838	LVSTQEFRYMNSQGLLPPKNSIDAF	DQB1-0201_DQA1-0501;DRB1_1503;DRB1_1602;DRB1_1502;DRB1_0901;DRB3_0202;DRB1_0401;DRB1_1101;DRB1_0407;DRB1_1601;DRB5_0102;DRB5_0101;DRB1_1402;DRB1_0102;DRB1_0701;DRB1_0803;DRB1_1501;DRB1_0101;DRB1_1001;DRB1_0802	0.937818232	0.944094855	0.822401273
orf1a polyprotein	3812	3836	DYLVSTQEFRYMNSQGLLPPKNSID	DQB1-0201_DQA1-0501;DRB1_1503;DRB1_1602;DRB1_1502;DRB1_0901;DRB3_0202;DRB1_0401;DRB1_1101;DRB1_0407;DRB1_1601;DRB5_0102;DRB5_0101;DRB1_1402;DRB1_0102;DRB1_0701;DRB1_0803;DRB1_1501;DRB1_0101;DRB1_1001;DRB1_0802	0.937818232	0.944094855	0.822401273
orf1a polyprotein	3813	3837	YLVSTQEFRYMNSQGLLPPKNSIDA	DQB1-0201_DQA1-0501;DRB1_1503;DRB1_1602;DRB1_1502;DRB1_0901;DRB3_0202;DRB1_0401;DRB1_1101;DRB1_0407;DRB1_1601;DRB5_0102;DRB5_0101;DRB1_1402;DRB1_0102;DRB1_0701;DRB1_0803;DRB1_1501;DRB1_0101;DRB1_1001;DRB1_0802	0.937818232	0.944094855	0.822401273
orf1ab polyprotein	3812	3836	DYLVSTQEFRYMNSQGLLPPKNSID	DQB1-0201_DQA1-0501;DRB1_1503;DRB1_1602;DRB1_1502;DRB1_0901;DRB3_0202;DRB1_0401;DRB1_1101;DRB1_0407;DRB1_1601;DRB5_0102;DRB5_0101;DRB1_1402;DRB1_0102;DRB1_0701;DRB1_0803;DRB1_1501;DRB1_0101;DRB1_1001;DRB1_0802	0.937818232	0.944094855	0.822401273
orf1ab polyprotein	3814	3838	LVSTQEFRYMNSQGLLPPKNSIDAF	DQB1-0201_DQA1-0501;DRB1_1503;DRB1_1602;DRB1_1502;DRB1_0901;DRB3_0202;DRB1_0401;DRB1_1101;DRB1_0407;DRB1_1601;DRB5_0102;DRB5_0101;DRB1_1402;DRB1_0102;DRB1_0701;DRB1_0803;DRB1_1501;DRB1_0101;DRB1_1001;DRB1_0802	0.937818232	0.944094855	0.822401273
surface glycoprotein	227	251	VDLPIGINITRFQTLLALHRSYLTP	DPB1-0401_DPA1-0103;DPB1-0101_DPA1-0103;DRB1_0404;DRB5_0202;DRB5_0102;DRB1_0406;DRB5_0101;DPB1-0301_DPA1-0103;DRB1_1401;DPB1-0402_DPA1-0103;DRB1_0402;DPB1-0201_DPA1-0103;DPB1-0601_DPA1-0103	0.974919438	0.975087166	0.583104892
orf1ab polyprotein	5734	5758	TLLTKGTLEPEYFNSVCRLMKTIGP	DPB1-0401_DPA1-0103;DRB1_1101;DRB5_0101;DQB1-0303_DQA1-0301;DPB1-0402_DPA1-0103;DRB1_0802;DPB1-0201_DPA1-0103;DQB1-0301_DQA1-0505;DQB1-0202_DQA1-0201	0.961285084	0.960025912	0.689724575
orf1ab polyprotein	3808	3832	LGVYDYLVSTQEFRYMNSQGLLPPK	DQB1-0201_DQA1-0501;DRB1_1602;DRB1_1502;DRB1_0802;DRB1_0901;DRB3_0202;DRB1_0401;DRB1_1101;DRB1_0407;DRB1_1601;DRB1_1402;DRB1_0102;DRB1_0701;DRB1_0405;DRB1_1501;DRB1_0803;DRB1_0101;DRB1_1001;DQB1-0202_DQA1-0201	0.922441939	0.933544045	0.864804888
orf1a polyprotein	3808	3832	LGVYDYLVSTQEFRYMNSQGLLPPK	DQB1-0201_DQA1-0501;DRB1_1602;DRB1_1502;DRB1_0802;DRB1_0901;DRB3_0202;DRB1_0401;DRB1_1101;DRB1_0407;DRB1_1601;DRB1_1402;DRB1_0102;DRB1_0701;DRB1_0405;DRB1_1501;DRB1_0803;DRB1_0101;DRB1_1001;DQB1-0202_DQA1-0201	0.922441939	0.933544045	0.864804888
surface glycoprotein	307	331	TVEKGIYQTSNFRVQPTESIVRFPN	DPB1-0401_DPA1-0103;DRB1_1502;DPB1-0202_DPA1-0103;DRB1_0401;DRB1_0406;DRB1_0302;DRB1_0405;DRB1_1001;DRB1_0701;DRB4_0103;DRB1_0101;DPB1-0201_DPA1-0103	0.950484774	0.955634273	0.719184476
orf1ab polyprotein	1826	1850	EYTGNYQCGHYKHITSKETLYCIDG	DPB1-0401_DPA1-0103;DRB1_1404;DRB1_1602;DRB1_1502;DRB1_1601;DRB1_0407;DRB1_1001;DRB1_0405;DPB1-0402_DPA1-0103;DRB1_0402;DRB1_0804;DRB1_0701;DRB1_0101;DPB1-0201_DPA1-0103;DRB1_0801	0.946631495	0.947416461	0.781379688
orf1ab polyprotein	1827	1851	YTGNYQCGHYKHITSKETLYCIDGA	DPB1-0401_DPA1-0103;DRB1_1404;DRB1_1602;DRB1_1502;DRB1_1601;DRB1_0407;DRB1_1001;DRB1_0405;DPB1-0402_DPA1-0103;DRB1_0402;DRB1_0804;DRB1_0701;DRB1_0101;DPB1-0201_DPA1-0103;DRB1_0801	0.946631495	0.947416461	0.781379688
orf1a polyprotein	1826	1850	EYTGNYQCGHYKHITSKETLYCIDG	DPB1-0401_DPA1-0103;DRB1_1404;DRB1_1602;DRB1_1502;DRB1_1601;DRB1_0407;DRB1_1001;DRB1_0405;DPB1-0402_DPA1-0103;DRB1_0402;DRB1_0804;DRB1_0701;DRB1_0101;DPB1-0201_DPA1-0103;DRB1_0801	0.946631495	0.947416461	0.781379688
orf1a polyprotein	1828	1852	TGNYQCGHYKHITSKETLYCIDGAL	DPB1-0401_DPA1-0103;DRB1_1404;DRB1_1602;DRB1_1502;DRB1_1601;DRB1_0407;DRB1_1001;DRB1_0405;DPB1-0402_DPA1-0103;DRB1_0402;DRB1_0804;DRB1_0701;DRB1_0101;DPB1-0201_DPA1-0103;DRB1_0801	0.946631495	0.947416461	0.781379688
orf1a polyprotein	1827	1851	YTGNYQCGHYKHITSKETLYCIDGA	DPB1-0401_DPA1-0103;DRB1_1404;DRB1_1602;DRB1_1502;DRB1_1601;DRB1_0407;DRB1_1001;DRB1_0405;DPB1-0402_DPA1-0103;DRB1_0402;DRB1_0804;DRB1_0701;DRB1_0101;DPB1-0201_DPA1-0103;DRB1_0801	0.946631495	0.947416461	0.781379688
orf1ab polyprotein	1828	1852	TGNYQCGHYKHITSKETLYCIDGAL	DPB1-0401_DPA1-0103;DRB1_1404;DRB1_1602;DRB1_1502;DRB1_1601;DRB1_0407;DRB1_1001;DRB1_0405;DPB1-0402_DPA1-0103;DRB1_0402;DRB1_0804;DRB1_0701;DRB1_0101;DPB1-0201_DPA1-0103;DRB1_0801	0.946631495	0.947416461	0.781379688
orf1ab polyprotein	1825	1849	SEYTGNYQCGHYKHITSKETLYCID	DPB1-0401_DPA1-0103;DRB1_1602;DRB1_1502;DRB1_1601;DRB1_0407;DRB1_1001;DRB1_0405;DPB1-0402_DPA1-0103;DRB1_0701;DRB1_1404;DRB1_0101;DPB1-0201_DPA1-0103;DRB1_0801	0.943688818	0.945799269	0.77897452
orf1ab polyprotein	1824	1848	ASEYTGNYQCGHYKHITSKETLYCI	DPB1-0401_DPA1-0103;DRB1_1602;DRB1_1502;DRB1_1601;DRB1_0407;DRB1_1001;DRB1_0405;DPB1-0402_DPA1-0103;DRB1_0701;DRB1_1404;DRB1_0101;DPB1-0201_DPA1-0103;DRB1_0801	0.943688818	0.945799269	0.77897452
orf1a polyprotein	1825	1849	SEYTGNYQCGHYKHITSKETLYCID	DPB1-0401_DPA1-0103;DRB1_1602;DRB1_1502;DRB1_1601;DRB1_0407;DRB1_1001;DRB1_0405;DPB1-0402_DPA1-0103;DRB1_0701;DRB1_1404;DRB1_0101;DPB1-0201_DPA1-0103;DRB1_0801	0.943688818	0.945799269	0.77897452
orf1a polyprotein	1824	1848	ASEYTGNYQCGHYKHITSKETLYCI	DPB1-0401_DPA1-0103;DRB1_1602;DRB1_1502;DRB1_1601;DRB1_0407;DRB1_1001;DRB1_0405;DPB1-0402_DPA1-0103;DRB1_0701;DRB1_1404;DRB1_0101;DPB1-0201_DPA1-0103;DRB1_0801	0.943688818	0.945799269	0.77897452
orf1ab polyprotein	1823	1847	CASEYTGNYQCGHYKHITSKETLYC	DPB1-0401_DPA1-0103;DRB1_1602;DRB1_1502;DRB1_1601;DRB1_0407;DQB1-0601_DQA1-0103;DRB1_0405;DPB1-0402_DPA1-0103;DRB1_0701;DRB1_1404;DRB1_0101;DPB1-0201_DPA1-0103;DRB1_0801	0.94251717	0.945253186	0.784904807
orf1a polyprotein	1823	1847	CASEYTGNYQCGHYKHITSKETLYC	DPB1-0401_DPA1-0103;DRB1_1602;DRB1_1502;DRB1_1601;DRB1_0407;DQB1-0601_DQA1-0103;DRB1_0405;DPB1-0402_DPA1-0103;DRB1_0701;DRB1_1404;DRB1_0101;DPB1-0201_DPA1-0103;DRB1_0801	0.94251717	0.945253186	0.784904807
surface glycoprotein	790	814	KTPPIKDFGGFNFSQILPDPSKPSK	DPB1-0101_DPA1-0202;DPB1-0401_DPA1-0103;DQB1-0602_DQA1-0102;DQB1-0303_DQA1-0201;DQB1-0302_DQA1-0301;DRB1_0901;DRB1_0411;DRB1_1303;DRB1_1001;DRB1_0405;DPB1-0402_DPA1-0103;DPB1-0201_DPA1-0103	0.951657175	0.946277553	0.745993777
surface glycoprotein	789	813	YKTPPIKDFGGFNFSQILPDPSKPS	DPB1-0101_DPA1-0202;DPB1-0401_DPA1-0103;DQB1-0602_DQA1-0102;DQB1-0303_DQA1-0201;DQB1-0302_DQA1-0301;DRB1_0901;DRB1_0411;DRB1_1303;DRB1_1001;DRB1_0405;DPB1-0402_DPA1-0103;DPB1-0201_DPA1-0103	0.951657175	0.946277553	0.745993777
orf1ab polyprotein	1822	1846	TCASEYTGNYQCGHYKHITSKETLY	DPB1-0401_DPA1-0103;DRB1_1602;DRB1_1502;DRB1_1601;DQB1-0601_DQA1-0103;DRB1_0405;DPB1-0402_DPA1-0103;DRB1_0701;DRB1_1404;DRB1_0101;DPB1-0201_DPA1-0103;DRB1_0801	0.939681012	0.943791534	0.784044323
orf1a polyprotein	1822	1846	TCASEYTGNYQCGHYKHITSKETLY	DPB1-0401_DPA1-0103;DRB1_1602;DRB1_1502;DRB1_1601;DQB1-0601_DQA1-0103;DRB1_0405;DPB1-0402_DPA1-0103;DRB1_0701;DRB1_1404;DRB1_0101;DPB1-0201_DPA1-0103;DRB1_0801	0.939681012	0.943791534	0.784044323
surface glycoprotein	787	811	QIYKTPPIKDFGGFNFSQILPDPSK	DPB1-0101_DPA1-0202;DPB1-0401_DPA1-0103;DQB1-0602_DQA1-0102;DQB1-0303_DQA1-0201;DQB1-0302_DQA1-0301;DRB1_0901;DRB1_0411;DRB1_1303;DRB1_0405;DPB1-0402_DPA1-0103;DPB1-0201_DPA1-0103	0.950387471	0.945358667	0.726078084
surface glycoprotein	788	812	IYKTPPIKDFGGFNFSQILPDPSKP	DPB1-0101_DPA1-0202;DPB1-0401_DPA1-0103;DQB1-0602_DQA1-0102;DQB1-0303_DQA1-0201;DQB1-0302_DQA1-0301;DRB1_0901;DRB1_0411;DRB1_1303;DRB1_0405;DPB1-0402_DPA1-0103;DPB1-0201_DPA1-0103	0.950387471	0.945358667	0.726078084
surface glycoprotein	786	810	KQIYKTPPIKDFGGFNFSQILPDPS	DPB1-0101_DPA1-0202;DPB1-0401_DPA1-0103;DQB1-0602_DQA1-0102;DQB1-0302_DQA1-0301;DRB1_0901;DRB1_0411;DRB1_1303;DRB1_0405;DPB1-0402_DPA1-0103;DPB1-0201_DPA1-0103	0.945248247	0.939698523	0.726078084
orf1a polyprotein	1821	1845	FTCASEYTGNYQCGHYKHITSKETL	DPB1-0401_DPA1-0103;DRB1_1602;DRB1_1502;DRB1_1601;DQB1-0601_DQA1-0103;DPB1-0402_DPA1-0103;DRB1_0701;DRB1_0101;DPB1-0201_DPA1-0103;DRB1_0801	0.937639327	0.943168368	0.733536605
orf1ab polyprotein	1821	1845	FTCASEYTGNYQCGHYKHITSKETL	DPB1-0401_DPA1-0103;DRB1_1602;DRB1_1502;DRB1_1601;DQB1-0601_DQA1-0103;DPB1-0402_DPA1-0103;DRB1_0701;DRB1_0101;DPB1-0201_DPA1-0103;DRB1_0801	0.937639327	0.943168368	0.733536605
orf1ab polyprotein	5738	5762	KGTLEPEYFNSVCRLMKTIGPDMFL	DPB1-0401_DPA1-0103;DQB1-0602_DQA1-0102;DRB1_1101;DRB5_0101;DQB1-0303_DQA1-0301;DRB1_1402;DPB1-0402_DPA1-0103;DRB1_1104;DRB1_0802;DQB1-0301_DQA1-0505;DQB1-0202_DQA1-0201	0.954603841	0.953289495	0.543584635
orf1ab polyprotein	1764	1788	GVEAVMYMGTLSYEQFKKGVQIPCT	DPB1-0401_DPA1-0103;DRB1_1102;DRB1_1301;DPB1-0202_DPA1-0103;DRB1_0404;DRB1_0407;DRB1_1101;DRB1_1201;DPB1-0402_DPA1-0103;DRB1_1406;DPB1-0201_DPA1-0103;DQB1-0202_DQA1-0201;DRB1_0801	0.947655728	0.946521988	0.62516484
orf1a polyprotein	1764	1788	GVEAVMYMGTLSYEQFKKGVQIPCT	DPB1-0401_DPA1-0103;DRB1_1102;DRB1_1301;DPB1-0202_DPA1-0103;DRB1_0404;DRB1_0407;DRB1_1101;DRB1_1201;DPB1-0402_DPA1-0103;DRB1_1406;DPB1-0201_DPA1-0103;DQB1-0202_DQA1-0201;DRB1_0801	0.947655728	0.946521988	0.62516484
surface glycoprotein	226	250	LVDLPIGINITRFQTLLALHRSYLT	DPB1-0401_DPA1-0103;DPB1-0101_DPA1-0103;DRB1_0404;DRB5_0202;DPB1-0301_DPA1-0103;DRB1_1401;DPB1-0402_DPA1-0103;DRB1_0402;DPB1-0201_DPA1-0103;DPB1-0601_DPA1-0103	0.962330938	0.962722335	0.564647399
orf1ab polyprotein	6743	6767	VCSVIDLLLDDFVEIIKSQDLSVVS	DPB1-0401_DPA1-0103;DRB1_1602;DQB1-0602_DQA1-0102;DRB1_1601;DRB1_1101;DRB1_1303;DRB1_1402;DRB1_0803;DRB1_0701;DPB1-0402_DPA1-0103;DRB1_1501;DRB1_0802;DRB1_0801	0.938338208	0.942944913	0.642197355
orf1a polyprotein	1763	1787	KGVEAVMYMGTLSYEQFKKGVQIPC	DPB1-0401_DPA1-0103;DRB1_1102;DRB1_1301;DPB1-0202_DPA1-0103;DRB1_0404;DRB1_0407;DRB1_1101;DRB1_1201;DPB1-0402_DPA1-0103;DRB1_1406;DPB1-0201_DPA1-0103;DQB1-0202_DQA1-0201	0.945356276	0.943295371	0.621297277
orf1ab polyprotein	1763	1787	KGVEAVMYMGTLSYEQFKKGVQIPC	DPB1-0401_DPA1-0103;DRB1_1102;DRB1_1301;DPB1-0202_DPA1-0103;DRB1_0404;DRB1_0407;DRB1_1101;DRB1_1201;DPB1-0402_DPA1-0103;DRB1_1406;DPB1-0201_DPA1-0103;DQB1-0202_DQA1-0201	0.945356276	0.943295371	0.621297277
orf1ab polyprotein	6443	6467	NLWNTFTRLQSLENVAFNVVNKGHF	DPB1-0401_DPA1-0103;DQB1-0602_DQA1-0102;DRB5_0102;DRB1_1202;DRB1_1201;DRB1_1001;DPB1-0402_DPA1-0103;DRB1_0101;DPB1-0201_DPA1-0103	0.938297409	0.939533515	0.682578663
orf1ab polyprotein	6742	6766	CVCSVIDLLLDDFVEIIKSQDLSVV	DPB1-0401_DPA1-0103;DRB1_1602;DQB1-0602_DQA1-0102;DRB1_1101;DRB1_1303;DRB1_1402;DRB1_0803;DRB1_0701;DPB1-0402_DPA1-0103;DRB1_1501;DRB1_0802;DRB1_0801	0.936758165	0.940957279	0.641910227
orf1ab polyprotein	6741	6765	KCVCSVIDLLLDDFVEIIKSQDLSV	DPB1-0401_DPA1-0103;DRB1_1602;DQB1-0602_DQA1-0102;DRB1_1101;DRB1_1303;DRB1_1402;DRB1_0803;DRB1_0701;DPB1-0402_DPA1-0103;DRB1_1501;DRB1_0802;DRB1_0801	0.936758165	0.940957279	0.641910227
orf1ab polyprotein	6740	6764	SKCVCSVIDLLLDDFVEIIKSQDLS	DPB1-0401_DPA1-0103;DRB1_1602;DQB1-0602_DQA1-0102;DRB1_1101;DRB1_1303;DRB1_1402;DRB1_0803;DRB1_0701;DPB1-0402_DPA1-0103;DRB1_1501;DRB1_0802;DRB1_0801	0.936758165	0.940957279	0.641910227
surface glycoprotein	225	249	PLVDLPIGINITRFQTLLALHRSYL	DPB1-0401_DPA1-0103;DPB1-0101_DPA1-0103;DRB1_0404;DRB5_0202;DPB1-0301_DPA1-0103;DPB1-0402_DPA1-0103;DRB1_0402;DPB1-0201_DPA1-0103;DPB1-0601_DPA1-0103	0.960517442	0.960723551	0.542645429
surface glycoprotein	224	248	EPLVDLPIGINITRFQTLLALHRSY	DPB1-0401_DPA1-0103;DPB1-0101_DPA1-0103;DRB1_0404;DRB5_0202;DPB1-0301_DPA1-0103;DPB1-0402_DPA1-0103;DRB1_0402;DPB1-0201_DPA1-0103;DPB1-0601_DPA1-0103	0.960517442	0.960723551	0.542645429
orf1ab polyprotein	1761	1785	TLKGVEAVMYMGTLSYEQFKKGVQI	DPB1-0401_DPA1-0103;DRB1_1102;DRB1_1301;DPB1-0202_DPA1-0103;DRB1_0404;DRB1_0407;DRB1_1202;DRB1_1201;DPB1-0402_DPA1-0103;DRB1_0402;DRB1_1406;DPB1-0201_DPA1-0103;DQB1-0202_DQA1-0201	0.939443029	0.936623072	0.643764061
orf1a polyprotein	1761	1785	TLKGVEAVMYMGTLSYEQFKKGVQI	DPB1-0401_DPA1-0103;DRB1_1102;DRB1_1301;DPB1-0202_DPA1-0103;DRB1_0404;DRB1_0407;DRB1_1202;DRB1_1201;DPB1-0402_DPA1-0103;DRB1_0402;DRB1_1406;DPB1-0201_DPA1-0103;DQB1-0202_DQA1-0201	0.939443029	0.936623072	0.643764061
orf1ab polyprotein	1760	1784	TTLKGVEAVMYMGTLSYEQFKKGVQ	DPB1-0401_DPA1-0103;DRB1_1102;DRB1_1301;DPB1-0202_DPA1-0103;DRB1_0404;DRB1_0407;DRB1_1202;DRB1_1201;DPB1-0402_DPA1-0103;DRB1_0402;DRB1_1406;DPB1-0201_DPA1-0103;DQB1-0202_DQA1-0201	0.939443029	0.936623072	0.643764061
orf1a polyprotein	1760	1784	TTLKGVEAVMYMGTLSYEQFKKGVQ	DPB1-0401_DPA1-0103;DRB1_1102;DRB1_1301;DPB1-0202_DPA1-0103;DRB1_0404;DRB1_0407;DRB1_1202;DRB1_1201;DPB1-0402_DPA1-0103;DRB1_0402;DRB1_1406;DPB1-0201_DPA1-0103;DQB1-0202_DQA1-0201	0.939443029	0.936623072	0.643764061
orf1ab polyprotein	602	626	TGGVVQLTSQWLTNIFGTVYEKLKP	DPB1-0401_DPA1-0103;DQB1-0201_DQA1-0501;DRB1_1503;DRB1_1602;DRB1_1601;DQB1-0201_DQA1-0201;DRB1_0102;DPB1-0402_DPA1-0103;DRB4_0103;DRB1_1501;DRB1_1404	0.944370312	0.945122029	0.527328889
orf1a polyprotein	602	626	TGGVVQLTSQWLTNIFGTVYEKLKP	DPB1-0401_DPA1-0103;DQB1-0201_DQA1-0501;DRB1_1503;DRB1_1602;DRB1_1601;DQB1-0201_DQA1-0201;DRB1_0102;DPB1-0402_DPA1-0103;DRB4_0103;DRB1_1501;DRB1_1404	0.944370312	0.945122029	0.527328889
surface glycoprotein	223	247	LEPLVDLPIGINITRFQTLLALHRS	DPB1-0401_DPA1-0103;DPB1-0101_DPA1-0103;DRB1_0404;DPB1-0301_DPA1-0103;DPB1-0402_DPA1-0103;DPB1-0201_DPA1-0103;DPB1-0601_DPA1-0103	0.958213812	0.958436244	0.539229542
surface glycoprotein	222	246	ALEPLVDLPIGINITRFQTLLALHR	DPB1-0401_DPA1-0103;DPB1-0101_DPA1-0103;DRB1_0404;DPB1-0301_DPA1-0103;DPB1-0402_DPA1-0103;DPB1-0201_DPA1-0103;DPB1-0601_DPA1-0103	0.958213812	0.958436244	0.539229542
orf1a polyprotein	483	507	STSAFVETVKGLDYKAFKQIVESCG	DPB1-0401_DPA1-0103;DPB1-0202_DPA1-0103;DRB1_1101;DRB1_1202;DRB1_1201;DRB1_0803;DPB1-0402_DPA1-0103;DPB1-0201_DPA1-0103;DQB1-0202_DQA1-0201;DRB1_0801	0.931968218	0.930867641	0.697121229
orf1ab polyprotein	483	507	STSAFVETVKGLDYKAFKQIVESCG	DPB1-0401_DPA1-0103;DPB1-0202_DPA1-0103;DRB1_1101;DRB1_1202;DRB1_1201;DRB1_0803;DPB1-0402_DPA1-0103;DPB1-0201_DPA1-0103;DQB1-0202_DQA1-0201;DRB1_0801	0.931968218	0.930867641	0.697121229
orf1ab polyprotein	5237	5261	DDIVKTDGTLMIERFVSLAIDAYPL	DPB1-0401_DPA1-0103;DRB1_1405;DPB1-0301_DPA1-0103;DPB1-0402_DPA1-0103;DPB1-0201_DPA1-0103;DPB1-0601_DPA1-0103	0.955352942	0.955242366	0.547081835
orf1a polyprotein	1762	1786	LKGVEAVMYMGTLSYEQFKKGVQIP	DPB1-0401_DPA1-0103;DRB1_1102;DRB1_1301;DPB1-0202_DPA1-0103;DRB1_0404;DRB1_0407;DRB1_1201;DPB1-0402_DPA1-0103;DRB1_0402;DRB1_1406;DPB1-0201_DPA1-0103;DQB1-0202_DQA1-0201	0.938648691	0.936623072	0.579444196
orf1ab polyprotein	1762	1786	LKGVEAVMYMGTLSYEQFKKGVQIP	DPB1-0401_DPA1-0103;DRB1_1102;DRB1_1301;DPB1-0202_DPA1-0103;DRB1_0404;DRB1_0407;DRB1_1201;DPB1-0402_DPA1-0103;DRB1_0402;DRB1_1406;DPB1-0201_DPA1-0103;DQB1-0202_DQA1-0201	0.938648691	0.936623072	0.579444196
surface glycoprotein	164	188	NNCTFEYVSQPFLMDLEGKQGNFKN	DPB1-0401_DPA1-0103;DPB1-0101_DPA1-0201;DPB1-0101_DPA1-0103;DRB1_0102;DPB1-0402_DPA1-0103;DRB3_0101;DPB1-0201_DPA1-0103	0.946905707	0.94639216	0.514463015
orf1a polyprotein	601	625	ITGGVVQLTSQWLTNIFGTVYEKLK	DPB1-0401_DPA1-0103;DQB1-0201_DQA1-0501;DRB1_1503;DRB1_1602;DRB1_1601;DRB1_1202;DRB1_1201;DRB1_0102;DRB4_0103;DRB1_1501;DRB1_1404;DQB1-0301_DQA1-0505	0.938412229	0.937848988	0.513733408
orf1ab polyprotein	601	625	ITGGVVQLTSQWLTNIFGTVYEKLK	DPB1-0401_DPA1-0103;DQB1-0201_DQA1-0501;DRB1_1503;DRB1_1602;DRB1_1601;DRB1_1202;DRB1_1201;DRB1_0102;DRB4_0103;DRB1_1501;DRB1_1404;DQB1-0301_DQA1-0505	0.938412229	0.937848988	0.513733408
orf1ab polyprotein	1820	1844	TFTCASEYTGNYQCGHYKHITSKET	DPB1-0401_DPA1-0103;DRB1_1602;DRB1_1502;DRB1_1601;DQB1-0601_DQA1-0103;DRB1_0701;DPB1-0402_DPA1-0103;DPB1-0201_DPA1-0103	0.922729626	0.923761453	0.711415372
orf1a polyprotein	1820	1844	TFTCASEYTGNYQCGHYKHITSKET	DPB1-0401_DPA1-0103;DRB1_1602;DRB1_1502;DRB1_1601;DQB1-0601_DQA1-0103;DRB1_0701;DPB1-0402_DPA1-0103;DPB1-0201_DPA1-0103	0.922729626	0.923761453	0.711415372
orf1ab polyprotein	5733	5757	RTLLTKGTLEPEYFNSVCRLMKTIG	DPB1-0401_DPA1-0103;DRB1_1101;DQB1-0303_DQA1-0301;DPB1-0402_DPA1-0103;DRB1_0802;DPB1-0201_DPA1-0103;DQB1-0202_DQA1-0201	0.92708212	0.924710524	0.689724575
orf1ab polyprotein	5239	5263	IVKTDGTLMIERFVSLAIDAYPLTK	DPB1-0401_DPA1-0103;DPB1-0301_DPA1-0103;DPB1-0402_DPA1-0103;DPB1-0201_DPA1-0103;DPB1-0601_DPA1-0103	0.955242366	0.955242366	0.530775
orf1ab polyprotein	5238	5262	DIVKTDGTLMIERFVSLAIDAYPLT	DPB1-0401_DPA1-0103;DPB1-0301_DPA1-0103;DPB1-0402_DPA1-0103;DPB1-0201_DPA1-0103;DPB1-0601_DPA1-0103	0.955242366	0.955242366	0.530775
orf1ab polyprotein	5240	5264	VKTDGTLMIERFVSLAIDAYPLTKH	DPB1-0401_DPA1-0103;DPB1-0301_DPA1-0103;DPB1-0402_DPA1-0103;DPB1-0201_DPA1-0103;DPB1-0601_DPA1-0103	0.955242366	0.955242366	0.530775
orf1ab polyprotein	5731	5755	APRTLLTKGTLEPEYFNSVCRLMKT	DPB1-0401_DPA1-0103;DRB1_1101;DQB1-0303_DQA1-0301;DPB1-0402_DPA1-0103;DRB1_0804;DPB1-0201_DPA1-0103;DQB1-0202_DQA1-0201	0.926322501	0.924812663	0.68103737
orf1ab polyprotein	5730	5754	PAPRTLLTKGTLEPEYFNSVCRLMK	DPB1-0401_DPA1-0103;DRB1_1101;DQB1-0303_DQA1-0301;DPB1-0402_DPA1-0103;DRB1_0804;DPB1-0201_DPA1-0103;DQB1-0202_DQA1-0201	0.926322501	0.924812663	0.68103737
orf1ab polyprotein	5234	5258	CFVDDIVKTDGTLMIERFVSLAIDA	DPB1-0401_DPA1-0103;DRB1_0301;DRB1_1405;DRB1_0701;DRB1_1404;DRB3_0301;DPB1-0201_DPA1-0103;DQB1-0202_DQA1-0201;DPB1-0601_DPA1-0103	0.923702039	0.930511388	0.610737123
orf1ab polyprotein	5732	5756	PRTLLTKGTLEPEYFNSVCRLMKTI	DPB1-0401_DPA1-0103;DRB1_1101;DQB1-0303_DQA1-0301;DPB1-0402_DPA1-0103;DPB1-0201_DPA1-0103;DQB1-0202_DQA1-0201	0.924853577	0.924670608	0.68103737
surface glycoprotein	162	186	SANNCTFEYVSQPFLMDLEGKQGNF	DPB1-0401_DPA1-0103;DPB1-0101_DPA1-0201;DPB1-0101_DPA1-0103;DPB1-0402_DPA1-0103;DRB3_0101;DPB1-0201_DPA1-0103	0.944518553	0.944518553	0.514191
surface glycoprotein	161	185	SSANNCTFEYVSQPFLMDLEGKQGN	DPB1-0401_DPA1-0103;DPB1-0101_DPA1-0201;DPB1-0101_DPA1-0103;DPB1-0402_DPA1-0103;DRB3_0101;DPB1-0201_DPA1-0103	0.944518553	0.944518553	0.514191
surface glycoprotein	163	187	ANNCTFEYVSQPFLMDLEGKQGNFK	DPB1-0401_DPA1-0103;DPB1-0101_DPA1-0201;DPB1-0101_DPA1-0103;DPB1-0402_DPA1-0103;DRB3_0101;DPB1-0201_DPA1-0103	0.944518553	0.944518553	0.514191
surface glycoprotein	305	329	SFTVEKGIYQTSNFRVQPTESIVRF	DPB1-0401_DPA1-0103;DRB1_1502;DPB1-0202_DPA1-0103;DRB1_0401;DRB1_0406;DRB1_0302;DRB1_0405;DRB1_1001;DRB1_0701;DRB1_0101;DPB1-0201_DPA1-0103	0.904484517	0.914417965	0.719184476
surface glycoprotein	304	328	KSFTVEKGIYQTSNFRVQPTESIVR	DPB1-0401_DPA1-0103;DRB1_1502;DPB1-0202_DPA1-0103;DRB1_0401;DRB1_0406;DRB1_0302;DRB1_0405;DRB1_1001;DRB1_0701;DRB1_0101;DPB1-0201_DPA1-0103	0.904484517	0.914417965	0.719184476
surface glycoprotein	306	330	FTVEKGIYQTSNFRVQPTESIVRFP	DPB1-0401_DPA1-0103;DRB1_1502;DPB1-0202_DPA1-0103;DRB1_0401;DRB1_0406;DRB1_0302;DRB1_0405;DRB1_1001;DRB1_0701;DRB1_0101;DPB1-0201_DPA1-0103	0.904484517	0.914417965	0.719184476
orf1a polyprotein	4269	4293	FCAFAVDAAKAYKDYLASGGQPITN	DPB1-0101_DPA1-0201;DRB1_1502;DQB1-0502_DQA1-0102;DPB1-0202_DPA1-0103;DQB1-0302_DQA1-0301;DRB1_0901;DRB1_0411;DQB1-0501_DQA1-0101;DPB1-0501_DPA1-0201;DRB1_0701;DRB1_0402;DRB1_1501;DRB1_0101;DQB1-0301_DQA1-0505;DRB3_0101	0.883227388	0.900944872	0.765099838
orf1ab polyprotein	4269	4293	FCAFAVDAAKAYKDYLASGGQPITN	DPB1-0101_DPA1-0201;DRB1_1502;DQB1-0502_DQA1-0102;DPB1-0202_DPA1-0103;DQB1-0302_DQA1-0301;DRB1_0901;DRB1_0411;DQB1-0501_DQA1-0101;DPB1-0501_DPA1-0201;DRB1_0701;DRB1_0402;DRB1_1501;DRB1_0101;DQB1-0301_DQA1-0505;DRB3_0101	0.883227388	0.900944872	0.765099838
orf1ab polyprotein	4270	4294	CAFAVDAAKAYKDYLASGGQPITNC	DPB1-0101_DPA1-0201;DRB1_1502;DQB1-0502_DQA1-0102;DPB1-0202_DPA1-0103;DQB1-0302_DQA1-0301;DRB1_0901;DRB1_0411;DQB1-0501_DQA1-0101;DPB1-0501_DPA1-0201;DRB1_0701;DRB1_0402;DRB1_1501;DRB1_0101;DQB1-0301_DQA1-0505;DRB3_0101	0.883227388	0.900944872	0.765099838
orf1a polyprotein	4270	4294	CAFAVDAAKAYKDYLASGGQPITNC	DPB1-0101_DPA1-0201;DRB1_1502;DQB1-0502_DQA1-0102;DPB1-0202_DPA1-0103;DQB1-0302_DQA1-0301;DRB1_0901;DRB1_0411;DQB1-0501_DQA1-0101;DPB1-0501_DPA1-0201;DRB1_0701;DRB1_0402;DRB1_1501;DRB1_0101;DQB1-0301_DQA1-0505;DRB3_0101	0.883227388	0.900944872	0.765099838
orf1ab polyprotein	6446	6470	NTFTRLQSLENVAFNVVNKGHFDGQ	DPB1-0101_DPA1-0202;DPB1-0401_DPA1-0103;DRB5_0102;DRB1_1202;DRB1_1201;DRB1_1001;DRB1_1401;DPB1-0402_DPA1-0103;DRB1_0101;DPB1-0201_DPA1-0103	0.923651416	0.922234063	0.677733071
orf1ab polyprotein	6445	6469	WNTFTRLQSLENVAFNVVNKGHFDG	DPB1-0101_DPA1-0202;DPB1-0401_DPA1-0103;DRB5_0102;DRB1_1202;DRB1_1201;DRB1_1001;DRB1_1401;DPB1-0402_DPA1-0103;DRB1_0101;DPB1-0201_DPA1-0103	0.923651416	0.922234063	0.677733071
orf1a polyprotein	2896	2920	CYTPSKLIEYTDFATSACVLAAECT	DPB1-0401_DPA1-0103;DRB1_1503;DQB1-0303_DQA1-0201;DQB1-0602_DQA1-0102;DRB1_1502;DQB1-0501_DQA1-0101;DPB1-0402_DPA1-0103;DRB1_1501;DQB1-0301_DQA1-0601	0.923379103	0.925277899	0.63558428
orf1ab polyprotein	2896	2920	CYTPSKLIEYTDFATSACVLAAECT	DPB1-0401_DPA1-0103;DRB1_1503;DQB1-0303_DQA1-0201;DQB1-0602_DQA1-0102;DRB1_1502;DQB1-0501_DQA1-0101;DPB1-0402_DPA1-0103;DRB1_1501;DQB1-0301_DQA1-0601	0.923379103	0.925277899	0.63558428
orf1ab polyprotein	6444	6468	LWNTFTRLQSLENVAFNVVNKGHFD	DPB1-0401_DPA1-0103;DRB5_0102;DRB1_1202;DPB1-0201_DPA1-0103;DRB1_1201;DRB1_1401;DPB1-0402_DPA1-0103;DRB1_0101;DRB1_1001	0.920166126	0.922234063	0.677733071
orf1ab polyprotein	484	508	TSAFVETVKGLDYKAFKQIVESCGN	DPB1-0401_DPA1-0103;DPB1-0202_DPA1-0103;DRB1_1601;DRB1_1202;DRB1_1201;DRB1_0803;DPB1-0402_DPA1-0103;DPB1-0201_DPA1-0103;DQB1-0202_DQA1-0201;DRB1_0801	0.924240132	0.923662825	0.656804969
orf1a polyprotein	484	508	TSAFVETVKGLDYKAFKQIVESCGN	DPB1-0401_DPA1-0103;DPB1-0202_DPA1-0103;DRB1_1601;DRB1_1202;DRB1_1201;DRB1_0803;DPB1-0402_DPA1-0103;DPB1-0201_DPA1-0103;DQB1-0202_DQA1-0201;DRB1_0801	0.924240132	0.923662825	0.656804969
orf1ab polyprotein	4693	4717	CLDDRCILHCANFNVLFSTVFPPTS	DPB1-0401_DPA1-0103;DRB1_0403;DRB1_0406;DRB1_1401;DPB1-0402_DPA1-0103;DRB1_1501;DPB1-0201_DPA1-0103	0.920432643	0.925950899	0.655881539
orf1ab polyprotein	4690	4714	CVNCLDDRCILHCANFNVLFSTVFP	DPB1-0401_DPA1-0103;DRB1_0403;DRB1_0406;DRB1_1401;DPB1-0402_DPA1-0103;DRB1_1501;DPB1-0201_DPA1-0103	0.920432643	0.925950899	0.655881539
orf1ab polyprotein	4692	4716	NCLDDRCILHCANFNVLFSTVFPPT	DPB1-0401_DPA1-0103;DRB1_0403;DRB1_0406;DRB1_1401;DPB1-0402_DPA1-0103;DRB1_1501;DPB1-0201_DPA1-0103	0.920432643	0.925950899	0.655881539
orf1ab polyprotein	4689	4713	NCVNCLDDRCILHCANFNVLFSTVF	DPB1-0401_DPA1-0103;DRB1_0403;DRB1_0406;DRB1_1401;DPB1-0402_DPA1-0103;DRB1_1501;DPB1-0201_DPA1-0103	0.920432643	0.925950899	0.655881539
orf1ab polyprotein	4691	4715	VNCLDDRCILHCANFNVLFSTVFPP	DPB1-0401_DPA1-0103;DRB1_0403;DRB1_0406;DRB1_1401;DPB1-0402_DPA1-0103;DRB1_1501;DPB1-0201_DPA1-0103	0.920432643	0.925950899	0.655881539
orf1ab polyprotein	2897	2921	YTPSKLIEYTDFATSACVLAAECTI	DPB1-0401_DPA1-0103;DQB1-0303_DQA1-0201;DQB1-0602_DQA1-0102;DRB1_1502;DQB1-0501_DQA1-0101;DPB1-0402_DPA1-0103;DRB1_1501;DQB1-0301_DQA1-0601	0.92017541	0.925244398	0.635089171
orf1a polyprotein	2897	2921	YTPSKLIEYTDFATSACVLAAECTI	DPB1-0401_DPA1-0103;DQB1-0303_DQA1-0201;DQB1-0602_DQA1-0102;DRB1_1502;DQB1-0501_DQA1-0101;DPB1-0402_DPA1-0103;DRB1_1501;DQB1-0301_DQA1-0601	0.92017541	0.925244398	0.635089171
orf1ab polyprotein	5729	5753	LPAPRTLLTKGTLEPEYFNSVCRLM	DPB1-0401_DPA1-0103;DQB1-0303_DQA1-0201;DRB1_1101;DPB1-0402_DPA1-0103;DRB1_0804;DPB1-0201_DPA1-0103;DQB1-0202_DQA1-0201	0.932310362	0.93092323	0.562655104
orf1ab polyprotein	5739	5763	GTLEPEYFNSVCRLMKTIGPDMFLG	DPB1-0401_DPA1-0103;DQB1-0602_DQA1-0102;DRB1_1101;DRB5_0101;DQB1-0303_DQA1-0301;DRB1_1402;DRB1_1104;DRB1_0802;DQB1-0301_DQA1-0505;DQB1-0202_DQA1-0201;DPB1-0601_DPA1-0103	0.933488237	0.931562536	0.482087143
orf1a polyprotein	1765	1789	VEAVMYMGTLSYEQFKKGVQIPCTC	DPB1-0401_DPA1-0103;DPB1-0202_DPA1-0103;DRB1_0407;DRB1_1101;DPB1-0402_DPA1-0103;DPB1-0201_DPA1-0103;DQB1-0202_DQA1-0201;DRB1_0801	0.930320349	0.929863544	0.568104774
orf1ab polyprotein	1766	1790	EAVMYMGTLSYEQFKKGVQIPCTCG	DPB1-0401_DPA1-0103;DPB1-0202_DPA1-0103;DRB1_0407;DRB1_1101;DPB1-0402_DPA1-0103;DPB1-0201_DPA1-0103;DQB1-0202_DQA1-0201;DRB1_0801	0.930320349	0.929863544	0.568104774
orf1a polyprotein	1766	1790	EAVMYMGTLSYEQFKKGVQIPCTCG	DPB1-0401_DPA1-0103;DPB1-0202_DPA1-0103;DRB1_0407;DRB1_1101;DPB1-0402_DPA1-0103;DPB1-0201_DPA1-0103;DQB1-0202_DQA1-0201;DRB1_0801	0.930320349	0.929863544	0.568104774
orf1ab polyprotein	1765	1789	VEAVMYMGTLSYEQFKKGVQIPCTC	DPB1-0401_DPA1-0103;DPB1-0202_DPA1-0103;DRB1_0407;DRB1_1101;DPB1-0402_DPA1-0103;DPB1-0201_DPA1-0103;DQB1-0202_DQA1-0201;DRB1_0801	0.930320349	0.929863544	0.568104774
orf1a polyprotein	3815	3839	VSTQEFRYMNSQGLLPPKNSIDAFK	DRB1_1503;DRB1_1602;DRB1_1502;DRB1_0401;DRB3_0202;DRB1_0407;DRB1_1101;DRB1_1601;DRB1_0901;DRB1_1402;DRB1_0102;DRB1_0701;DRB1_0803;DRB1_1501;DRB1_0101;DRB1_1001;DRB1_0802	0.866492627	0.87996885	0.797283942
orf1ab polyprotein	3815	3839	VSTQEFRYMNSQGLLPPKNSIDAFK	DRB1_1503;DRB1_1602;DRB1_1502;DRB1_0401;DRB3_0202;DRB1_0407;DRB1_1101;DRB1_1601;DRB1_0901;DRB1_1402;DRB1_0102;DRB1_0701;DRB1_0803;DRB1_1501;DRB1_0101;DRB1_1001;DRB1_0802	0.866492627	0.87996885	0.797283942
orf1ab polyprotein	1767	1791	AVMYMGTLSYEQFKKGVQIPCTCGK	DPB1-0401_DPA1-0103;DPB1-0202_DPA1-0103;DRB1_1101;DPB1-0402_DPA1-0103;DPB1-0201_DPA1-0103;DQB1-0202_DQA1-0201;DRB1_0801	0.927554393	0.928396769	0.56681208
orf1a polyprotein	1767	1791	AVMYMGTLSYEQFKKGVQIPCTCGK	DPB1-0401_DPA1-0103;DPB1-0202_DPA1-0103;DRB1_1101;DPB1-0402_DPA1-0103;DPB1-0201_DPA1-0103;DQB1-0202_DQA1-0201;DRB1_0801	0.927554393	0.928396769	0.56681208
orf1ab polyprotein	6447	6471	TFTRLQSLENVAFNVVNKGHFDGQQ	DPB1-0101_DPA1-0202;DPB1-0401_DPA1-0103;DRB1_1101;DRB1_1202;DRB1_1201;DRB1_1401;DPB1-0402_DPA1-0103;DRB1_0802;DPB1-0201_DPA1-0103	0.919064568	0.911108647	0.68219657
orf1a polyprotein	485	509	SAFVETVKGLDYKAFKQIVESCGNF	DPB1-0401_DPA1-0103;DPB1-0202_DPA1-0103;DRB1_1601;DRB1_1201;DRB1_0803;DPB1-0402_DPA1-0103;DPB1-0201_DPA1-0103;DQB1-0202_DQA1-0201;DRB1_0801	0.923351968	0.923662825	0.593624094
orf1ab polyprotein	485	509	SAFVETVKGLDYKAFKQIVESCGNF	DPB1-0401_DPA1-0103;DPB1-0202_DPA1-0103;DRB1_1601;DRB1_1201;DRB1_0803;DPB1-0402_DPA1-0103;DPB1-0201_DPA1-0103;DQB1-0202_DQA1-0201;DRB1_0801	0.923351968	0.923662825	0.593624094
orf1ab polyprotein	3816	3840	STQEFRYMNSQGLLPPKNSIDAFKL	DRB1_1602;DRB1_1502;DRB1_0401;DRB3_0202;DRB1_0407;DRB1_1101;DRB1_1601;DRB1_0901;DRB1_1402;DRB1_0102;DRB1_0701;DRB1_0803;DRB1_1501;DRB1_0101;DRB1_1001;DRB1_0802	0.85542145	0.879858763	0.796770344
orf1a polyprotein	3816	3840	STQEFRYMNSQGLLPPKNSIDAFKL	DRB1_1602;DRB1_1502;DRB1_0401;DRB3_0202;DRB1_0407;DRB1_1101;DRB1_1601;DRB1_0901;DRB1_1402;DRB1_0102;DRB1_0701;DRB1_0803;DRB1_1501;DRB1_0101;DRB1_1001;DRB1_0802	0.85542145	0.879858763	0.796770344
ORF7a protein	43	67	NSPFHPLADNKFALTCFSTQFAFAC	DPB1-0401_DPA1-0103;DQB1-0602_DQA1-0102;DRB1_0404;DPB1-0402_DPA1-0103;DPB1-0201_DPA1-0103	0.925353131	0.925750485	0.556674096
orf1ab polyprotein	6705	6729	GLAKRFKESPFELEDFIPMDSTVKN	DPB1-0401_DPA1-0103;DRB1_1602;DPB1-0101_DPA1-0103;DRB5_0102;DRB5_0101;DRB1_1402;DPB1-0402_DPA1-0103;DPB1-0201_DPA1-0103	0.928442771	0.926858676	0.533229056
surface glycoprotein	230	254	PIGINITRFQTLLALHRSYLTPGDS	DPB1-0401_DPA1-0103;DRB1_1301;DPB1-0101_DPA1-0103;DRB1_0404;DRB5_0102;DRB1_0406;DRB1_1405;DRB5_0101;DPB1-0301_DPA1-0103;DRB1_1401;DPB1-0402_DPA1-0103;DRB1_0402;DRB1_1404;DPB1-0601_DPA1-0103	0.942168843	0.943198775	0.403113376
surface glycoprotein	229	253	LPIGINITRFQTLLALHRSYLTPGD	DPB1-0401_DPA1-0103;DRB1_1301;DPB1-0101_DPA1-0103;DRB1_0404;DRB5_0202;DRB5_0102;DRB1_0406;DRB5_0101;DPB1-0301_DPA1-0103;DRB1_1401;DPB1-0402_DPA1-0103;DRB1_0402;DPB1-0601_DPA1-0103	0.944306532	0.94562198	0.350663942
surface glycoprotein	228	252	DLPIGINITRFQTLLALHRSYLTPG	DPB1-0401_DPA1-0103;DRB1_1301;DPB1-0101_DPA1-0103;DRB1_0404;DRB5_0202;DRB5_0102;DRB1_0406;DRB5_0101;DPB1-0301_DPA1-0103;DRB1_1401;DPB1-0402_DPA1-0103;DRB1_0402;DPB1-0601_DPA1-0103	0.944306532	0.94562198	0.350663942
orf1ab polyprotein	1817	1841	KHGTFTCASEYTGNYQCGHYKHITS	DPB1-0401_DPA1-0103;DPB1-1001_DPA1-0201;DRB1_0901;DQB1-0601_DQA1-0103;DPB1-1101_DPA1-0201;DPB1-0402_DPA1-0103;DPB1-0201_DPA1-0103	0.919371383	0.917769728	0.651481872
orf1a polyprotein	1817	1841	KHGTFTCASEYTGNYQCGHYKHITS	DPB1-0401_DPA1-0103;DPB1-1001_DPA1-0201;DRB1_0901;DQB1-0601_DQA1-0103;DPB1-1101_DPA1-0201;DPB1-0402_DPA1-0103;DPB1-0201_DPA1-0103	0.919371383	0.917769728	0.651481872
orf1ab polyprotein	613	637	LTNIFGTVYEKLKPVLDWLEEKFKE	DPB1-0401_DPA1-0103;DQB1-0201_DQA1-0501;DRB1_0410;DQB1-0302_DQA1-0301;DQB1-0201_DQA1-0201;DQB1-0604_DQA1-0102;DRB1_0411;DRB1_0405;DPB1-0402_DPA1-0103;DRB1_0803;DRB1_0101;DRB1_1001	0.909695229	0.910178227	0.642179434
orf1a polyprotein	613	637	LTNIFGTVYEKLKPVLDWLEEKFKE	DPB1-0401_DPA1-0103;DQB1-0201_DQA1-0501;DRB1_0410;DQB1-0302_DQA1-0301;DQB1-0201_DQA1-0201;DQB1-0604_DQA1-0102;DRB1_0411;DRB1_0405;DPB1-0402_DPA1-0103;DRB1_0803;DRB1_0101;DRB1_1001	0.909695229	0.910178227	0.642179434
orf1a polyprotein	612	636	WLTNIFGTVYEKLKPVLDWLEEKFK	DPB1-0401_DPA1-0103;DQB1-0201_DQA1-0501;DRB1_0410;DQB1-0302_DQA1-0301;DQB1-0201_DQA1-0201;DQB1-0604_DQA1-0102;DRB1_0411;DRB1_0405;DPB1-0402_DPA1-0103;DRB1_0803;DRB1_0101;DRB1_1001	0.909695229	0.910178227	0.642179434
orf1ab polyprotein	612	636	WLTNIFGTVYEKLKPVLDWLEEKFK	DPB1-0401_DPA1-0103;DQB1-0201_DQA1-0501;DRB1_0410;DQB1-0302_DQA1-0301;DQB1-0201_DQA1-0201;DQB1-0604_DQA1-0102;DRB1_0411;DRB1_0405;DPB1-0402_DPA1-0103;DRB1_0803;DRB1_0101;DRB1_1001	0.909695229	0.910178227	0.642179434
orf1a polyprotein	610	634	SQWLTNIFGTVYEKLKPVLDWLEEK	DPB1-0401_DPA1-0103;DQB1-0201_DQA1-0501;DQB1-0302_DQA1-0301;DQB1-0201_DQA1-0201;DQB1-0604_DQA1-0102;DRB1_0411;DRB1_0405;DPB1-0402_DPA1-0103;DRB1_0803;DRB1_0101;DRB1_1001	0.909459929	0.910178227	0.642179434
orf1ab polyprotein	611	635	QWLTNIFGTVYEKLKPVLDWLEEKF	DPB1-0401_DPA1-0103;DQB1-0201_DQA1-0501;DQB1-0302_DQA1-0301;DQB1-0201_DQA1-0201;DQB1-0604_DQA1-0102;DRB1_0411;DRB1_0405;DPB1-0402_DPA1-0103;DRB1_0803;DRB1_0101;DRB1_1001	0.909459929	0.910178227	0.642179434
orf1a polyprotein	611	635	QWLTNIFGTVYEKLKPVLDWLEEKF	DPB1-0401_DPA1-0103;DQB1-0201_DQA1-0501;DQB1-0302_DQA1-0301;DQB1-0201_DQA1-0201;DQB1-0604_DQA1-0102;DRB1_0411;DRB1_0405;DPB1-0402_DPA1-0103;DRB1_0803;DRB1_0101;DRB1_1001	0.909459929	0.910178227	0.642179434
orf1ab polyprotein	610	634	SQWLTNIFGTVYEKLKPVLDWLEEK	DPB1-0401_DPA1-0103;DQB1-0201_DQA1-0501;DQB1-0302_DQA1-0301;DQB1-0201_DQA1-0201;DQB1-0604_DQA1-0102;DRB1_0411;DRB1_0405;DPB1-0402_DPA1-0103;DRB1_0803;DRB1_0101;DRB1_1001	0.909459929	0.910178227	0.642179434
orf1ab polyprotein	2892	2916	VGNICYTPSKLIEYTDFATSACVLA	DPB1-0401_DPA1-0103;DRB1_1503;DRB1_1502;DRB1_1601;DQB1-0501_DQA1-0101;DRB1_0701;DPB1-0402_DPA1-0103;DRB1_1501	0.913495426	0.920051324	0.577302335
orf1a polyprotein	2892	2916	VGNICYTPSKLIEYTDFATSACVLA	DPB1-0401_DPA1-0103;DRB1_1503;DRB1_1502;DRB1_1601;DQB1-0501_DQA1-0101;DRB1_0701;DPB1-0402_DPA1-0103;DRB1_1501	0.913495426	0.920051324	0.577302335
orf1ab polyprotein	2893	2917	GNICYTPSKLIEYTDFATSACVLAA	DPB1-0401_DPA1-0103;DRB1_1503;DRB1_1502;DRB1_1601;DQB1-0501_DQA1-0101;DRB1_0701;DPB1-0402_DPA1-0103;DRB1_1501	0.913495426	0.920051324	0.577302335
orf1a polyprotein	2893	2917	GNICYTPSKLIEYTDFATSACVLAA	DPB1-0401_DPA1-0103;DRB1_1503;DRB1_1502;DRB1_1601;DQB1-0501_DQA1-0101;DRB1_0701;DPB1-0402_DPA1-0103;DRB1_1501	0.913495426	0.920051324	0.577302335
orf1ab polyprotein	609	633	TSQWLTNIFGTVYEKLKPVLDWLEE	DPB1-0401_DPA1-0103;DQB1-0201_DQA1-0501;DQB1-0302_DQA1-0301;DQB1-0201_DQA1-0201;DQB1-0604_DQA1-0102;DRB1_0405;DPB1-0402_DPA1-0103;DRB1_0803;DRB1_0101;DRB1_1001	0.908602048	0.910178227	0.642179434
orf1a polyprotein	609	633	TSQWLTNIFGTVYEKLKPVLDWLEE	DPB1-0401_DPA1-0103;DQB1-0201_DQA1-0501;DQB1-0302_DQA1-0301;DQB1-0201_DQA1-0201;DQB1-0604_DQA1-0102;DRB1_0405;DPB1-0402_DPA1-0103;DRB1_0803;DRB1_0101;DRB1_1001	0.908602048	0.910178227	0.642179434
orf1a polyprotein	2031	2055	EDAQGMDNLACEDLKPVSEEVVENP	DPB1-0401_DPA1-0103;DQB1-0201_DQA1-0501;DRB1_1503;DPB1-0202_DPA1-0103;DPB1-0402_DPA1-0103;DPB1-0201_DPA1-0103	0.920849398	0.917992251	0.574869742
orf1ab polyprotein	2031	2055	EDAQGMDNLACEDLKPVSEEVVENP	DPB1-0401_DPA1-0103;DQB1-0201_DQA1-0501;DRB1_1503;DPB1-0202_DPA1-0103;DPB1-0402_DPA1-0103;DPB1-0201_DPA1-0103	0.920849398	0.917992251	0.574869742
orf1a polyprotein	2032	2056	DAQGMDNLACEDLKPVSEEVVENPT	DPB1-0401_DPA1-0103;DQB1-0201_DQA1-0501;DRB1_1503;DPB1-0202_DPA1-0103;DPB1-0402_DPA1-0103;DPB1-0201_DPA1-0103	0.920849398	0.917992251	0.574869742
orf1a polyprotein	2030	2054	SEDAQGMDNLACEDLKPVSEEVVEN	DPB1-0401_DPA1-0103;DQB1-0201_DQA1-0501;DRB1_1503;DPB1-0202_DPA1-0103;DPB1-0402_DPA1-0103;DPB1-0201_DPA1-0103	0.920849398	0.917992251	0.574869742
orf1ab polyprotein	2032	2056	DAQGMDNLACEDLKPVSEEVVENPT	DPB1-0401_DPA1-0103;DQB1-0201_DQA1-0501;DRB1_1503;DPB1-0202_DPA1-0103;DPB1-0402_DPA1-0103;DPB1-0201_DPA1-0103	0.920849398	0.917992251	0.574869742
orf1ab polyprotein	2030	2054	SEDAQGMDNLACEDLKPVSEEVVEN	DPB1-0401_DPA1-0103;DQB1-0201_DQA1-0501;DRB1_1503;DPB1-0202_DPA1-0103;DPB1-0402_DPA1-0103;DPB1-0201_DPA1-0103	0.920849398	0.917992251	0.574869742
orf1ab polyprotein	6448	6472	FTRLQSLENVAFNVVNKGHFDGQQG	DPB1-0101_DPA1-0202;DPB1-0401_DPA1-0103;DRB1_1101;DRB1_1201;DRB1_1401;DPB1-0402_DPA1-0103;DRB1_0802;DPB1-0201_DPA1-0103	0.918046509	0.911108647	0.621297277
orf1ab polyprotein	4694	4718	LDDRCILHCANFNVLFSTVFPPTSF	DPB1-0401_DPA1-0103;DPB1-0201_DPA1-0103;DPB1-0402_DPA1-0103;DRB1_1501	0.914023441	0.920363583	0.588086894
orf1a polyprotein	2029	2053	KSEDAQGMDNLACEDLKPVSEEVVE	DPB1-0401_DPA1-0103;DQB1-0201_DQA1-0501;DPB1-0202_DPA1-0103;DPB1-0402_DPA1-0103;DPB1-0201_DPA1-0103	0.917961079	0.917961079	0.574384678
orf1ab polyprotein	2029	2053	KSEDAQGMDNLACEDLKPVSEEVVE	DPB1-0401_DPA1-0103;DQB1-0201_DQA1-0501;DPB1-0202_DPA1-0103;DPB1-0402_DPA1-0103;DPB1-0201_DPA1-0103	0.917961079	0.917961079	0.574384678
orf1ab polyprotein	5728	5752	QLPAPRTLLTKGTLEPEYFNSVCRL	DPB1-0401_DPA1-0103;DQB1-0303_DQA1-0201;DPB1-0402_DPA1-0103;DRB1_0804;DPB1-0201_DPA1-0103;DQB1-0202_DQA1-0201	0.92368178	0.922387547	0.514191
orf1ab polyprotein	5727	5751	AQLPAPRTLLTKGTLEPEYFNSVCR	DPB1-0401_DPA1-0103;DQB1-0303_DQA1-0201;DPB1-0402_DPA1-0103;DRB1_0804;DPB1-0201_DPA1-0103;DQB1-0202_DQA1-0201	0.92368178	0.922387547	0.514191
orf1ab polyprotein	1819	1843	GTFTCASEYTGNYQCGHYKHITSKE	DPB1-0401_DPA1-0103;DPB1-1001_DPA1-0201;DRB1_1602;DRB1_0901;DRB1_1601;DQB1-0601_DQA1-0103;DPB1-0402_DPA1-0103;DPB1-0201_DPA1-0103	0.909371044	0.906759796	0.666670619
orf1a polyprotein	1819	1843	GTFTCASEYTGNYQCGHYKHITSKE	DPB1-0401_DPA1-0103;DPB1-1001_DPA1-0201;DRB1_1602;DRB1_0901;DRB1_1601;DQB1-0601_DQA1-0103;DPB1-0402_DPA1-0103;DPB1-0201_DPA1-0103	0.909371044	0.906759796	0.666670619
orf1a polyprotein	1818	1842	HGTFTCASEYTGNYQCGHYKHITSK	DPB1-0401_DPA1-0103;DPB1-1001_DPA1-0201;DRB1_0901;DRB1_1601;DQB1-0601_DQA1-0103;DPB1-0402_DPA1-0103;DPB1-0201_DPA1-0103	0.907890142	0.906517957	0.651699131
orf1ab polyprotein	1818	1842	HGTFTCASEYTGNYQCGHYKHITSK	DPB1-0401_DPA1-0103;DPB1-1001_DPA1-0201;DRB1_0901;DRB1_1601;DQB1-0601_DQA1-0103;DPB1-0402_DPA1-0103;DPB1-0201_DPA1-0103	0.907890142	0.906517957	0.651699131
orf1ab polyprotein	4759	4783	SFKELLVYAADPAMHAASGNLLLDK	DPB1-0101_DPA1-0201;DPB1-0101_DPA1-0103;DRB1_0401;DRB3_0202;DRB1_0403;DRB1_0901;DRB1_0701;DRB1_1501;DRB1_0101;DQB1-0301_DQA1-0505;DRB3_0101	0.886544487	0.91619706	0.55643068
orf1ab polyprotein	5073	5097	SSGDATTAYANSVFNICQAVTANVN	DPB1-0401_DPA1-0103;DQB1-0303_DQA1-0201;DPB1-0402_DPA1-0103;DRB1_0101;DPB1-0201_DPA1-0103	0.912509907	0.916660092	0.540476957
orf1ab polyprotein	5074	5098	SGDATTAYANSVFNICQAVTANVNA	DPB1-0401_DPA1-0103;DQB1-0303_DQA1-0201;DPB1-0402_DPA1-0103;DRB1_0101;DPB1-0201_DPA1-0103	0.912509907	0.916660092	0.540476957
orf1ab polyprotein	6151	6175	CWHHSIGFDYVYNPFMIDVQQWGFT	DPB1-0401_DPA1-0103;DRB1_1602;DPB1-0101_DPA1-0201;DPB1-0101_DPA1-0103;DPB1-0402_DPA1-0103;DPB1-0201_DPA1-0103	0.918779632	0.917696886	0.532962349
orf1ab polyprotein	6153	6177	HHSIGFDYVYNPFMIDVQQWGFTGN	DPB1-0401_DPA1-0103;DRB1_1602;DPB1-0101_DPA1-0201;DPB1-0101_DPA1-0103;DPB1-0402_DPA1-0103;DPB1-0201_DPA1-0103	0.918779632	0.917696886	0.532962349
orf1ab polyprotein	6150	6174	ACWHHSIGFDYVYNPFMIDVQQWGF	DPB1-0401_DPA1-0103;DRB1_1602;DPB1-0101_DPA1-0201;DPB1-0101_DPA1-0103;DPB1-0402_DPA1-0103;DPB1-0201_DPA1-0103	0.918779632	0.917696886	0.532962349
orf1ab polyprotein	6149	6173	YACWHHSIGFDYVYNPFMIDVQQWG	DPB1-0401_DPA1-0103;DRB1_1602;DPB1-0101_DPA1-0201;DPB1-0101_DPA1-0103;DPB1-0402_DPA1-0103;DPB1-0201_DPA1-0103	0.918779632	0.917696886	0.532962349
orf1ab polyprotein	6152	6176	WHHSIGFDYVYNPFMIDVQQWGFTG	DPB1-0401_DPA1-0103;DRB1_1602;DPB1-0101_DPA1-0201;DPB1-0101_DPA1-0103;DPB1-0402_DPA1-0103;DPB1-0201_DPA1-0103	0.918779632	0.917696886	0.532962349
orf1a polyprotein	1770	1794	YMGTLSYEQFKKGVQIPCTCGKQAT	DPB1-0401_DPA1-0103;DPB1-0202_DPA1-0103;DRB1_1101;DPB1-0402_DPA1-0103;DPB1-0201_DPA1-0103;DRB1_0801	0.906873156	0.907956007	0.56681208
orf1ab polyprotein	1768	1792	VMYMGTLSYEQFKKGVQIPCTCGKQ	DPB1-0401_DPA1-0103;DPB1-0202_DPA1-0103;DRB1_1101;DPB1-0402_DPA1-0103;DPB1-0201_DPA1-0103;DRB1_0801	0.906873156	0.907956007	0.56681208
orf1a polyprotein	1771	1795	MGTLSYEQFKKGVQIPCTCGKQATK	DPB1-0401_DPA1-0103;DPB1-0202_DPA1-0103;DRB1_1101;DPB1-0402_DPA1-0103;DPB1-0201_DPA1-0103;DRB1_0801	0.906873156	0.907956007	0.56681208
orf1ab polyprotein	1770	1794	YMGTLSYEQFKKGVQIPCTCGKQAT	DPB1-0401_DPA1-0103;DPB1-0202_DPA1-0103;DRB1_1101;DPB1-0402_DPA1-0103;DPB1-0201_DPA1-0103;DRB1_0801	0.906873156	0.907956007	0.56681208
orf1ab polyprotein	1771	1795	MGTLSYEQFKKGVQIPCTCGKQATK	DPB1-0401_DPA1-0103;DPB1-0202_DPA1-0103;DRB1_1101;DPB1-0402_DPA1-0103;DPB1-0201_DPA1-0103;DRB1_0801	0.906873156	0.907956007	0.56681208
orf1a polyprotein	1769	1793	MYMGTLSYEQFKKGVQIPCTCGKQA	DPB1-0401_DPA1-0103;DPB1-0202_DPA1-0103;DRB1_1101;DPB1-0402_DPA1-0103;DPB1-0201_DPA1-0103;DRB1_0801	0.906873156	0.907956007	0.56681208
orf1a polyprotein	1768	1792	VMYMGTLSYEQFKKGVQIPCTCGKQ	DPB1-0401_DPA1-0103;DPB1-0202_DPA1-0103;DRB1_1101;DPB1-0402_DPA1-0103;DPB1-0201_DPA1-0103;DRB1_0801	0.906873156	0.907956007	0.56681208
orf1ab polyprotein	1769	1793	MYMGTLSYEQFKKGVQIPCTCGKQA	DPB1-0401_DPA1-0103;DPB1-0202_DPA1-0103;DRB1_1101;DPB1-0402_DPA1-0103;DPB1-0201_DPA1-0103;DRB1_0801	0.906873156	0.907956007	0.56681208
orf1ab polyprotein	6154	6178	HSIGFDYVYNPFMIDVQQWGFTGNL	DPB1-0401_DPA1-0103;DPB1-0101_DPA1-0201;DPB1-0101_DPA1-0103;DPB1-0402_DPA1-0103;DPB1-0201_DPA1-0103	0.917487438	0.917487438	0.514191
surface glycoprotein	160	184	YSSANNCTFEYVSQPFLMDLEGKQG	DPB1-0401_DPA1-0103;DPB1-0101_DPA1-0201;DPB1-0101_DPA1-0103;DPB1-0402_DPA1-0103;DPB1-0201_DPA1-0103	0.917487438	0.917487438	0.514191
surface glycoprotein	159	183	VYSSANNCTFEYVSQPFLMDLEGKQ	DPB1-0401_DPA1-0103;DPB1-0101_DPA1-0201;DPB1-0101_DPA1-0103;DPB1-0402_DPA1-0103;DPB1-0201_DPA1-0103	0.917487438	0.917487438	0.514191
orf1ab polyprotein	4271	4295	AFAVDAAKAYKDYLASGGQPITNCV	DPB1-0101_DPA1-0201;DRB1_1502;DQB1-0502_DQA1-0102;DPB1-0202_DPA1-0103;DQB1-0302_DQA1-0301;DRB1_0901;DRB1_1601;DRB1_0411;DQB1-0501_DQA1-0101;DPB1-0501_DPA1-0201;DRB1_0701;DRB1_0402;DRB1_1501;DRB1_0101;DQB1-0301_DQA1-0505	0.830637489	0.857841752	0.765310261
orf1a polyprotein	4271	4295	AFAVDAAKAYKDYLASGGQPITNCV	DPB1-0101_DPA1-0201;DRB1_1502;DQB1-0502_DQA1-0102;DPB1-0202_DPA1-0103;DQB1-0302_DQA1-0301;DRB1_0901;DRB1_1601;DRB1_0411;DQB1-0501_DQA1-0101;DPB1-0501_DPA1-0201;DRB1_0701;DRB1_0402;DRB1_1501;DRB1_0101;DQB1-0301_DQA1-0505	0.830637489	0.857841752	0.765310261
orf1a polyprotein	487	511	FVETVKGLDYKAFKQIVESCGNFKV	DPB1-0401_DPA1-0103;DPB1-0202_DPA1-0103;DRB1_1601;DRB1_1201;DRB1_0803;DPB1-0402_DPA1-0103;DPB1-0201_DPA1-0103;DRB1_0801	0.901471054	0.901870652	0.593624094
orf1ab polyprotein	488	512	VETVKGLDYKAFKQIVESCGNFKVT	DPB1-0401_DPA1-0103;DPB1-0202_DPA1-0103;DRB1_1601;DRB1_1201;DRB1_0803;DPB1-0402_DPA1-0103;DPB1-0201_DPA1-0103;DRB1_0801	0.901471054	0.901870652	0.593624094
orf1ab polyprotein	486	510	AFVETVKGLDYKAFKQIVESCGNFK	DPB1-0401_DPA1-0103;DPB1-0202_DPA1-0103;DRB1_1601;DRB1_1201;DRB1_0803;DPB1-0402_DPA1-0103;DPB1-0201_DPA1-0103;DRB1_0801	0.901471054	0.901870652	0.593624094
orf1a polyprotein	488	512	VETVKGLDYKAFKQIVESCGNFKVT	DPB1-0401_DPA1-0103;DPB1-0202_DPA1-0103;DRB1_1601;DRB1_1201;DRB1_0803;DPB1-0402_DPA1-0103;DPB1-0201_DPA1-0103;DRB1_0801	0.901471054	0.901870652	0.593624094
orf1ab polyprotein	487	511	FVETVKGLDYKAFKQIVESCGNFKV	DPB1-0401_DPA1-0103;DPB1-0202_DPA1-0103;DRB1_1601;DRB1_1201;DRB1_0803;DPB1-0402_DPA1-0103;DPB1-0201_DPA1-0103;DRB1_0801	0.901471054	0.901870652	0.593624094
orf1a polyprotein	486	510	AFVETVKGLDYKAFKQIVESCGNFK	DPB1-0401_DPA1-0103;DPB1-0202_DPA1-0103;DRB1_1601;DRB1_1201;DRB1_0803;DPB1-0402_DPA1-0103;DPB1-0201_DPA1-0103;DRB1_0801	0.901471054	0.901870652	0.593624094
orf1ab polyprotein	4760	4784	FKELLVYAADPAMHAASGNLLLDKR	DRB1_0401;DRB3_0202;DRB1_0403;DRB1_0901;DRB1_0701;DRB1_1501;DRB1_0101;DQB1-0301_DQA1-0505;DRB3_0101	0.876228512	0.908577254	0.55643068
surface glycoprotein	792	816	PPIKDFGGFNFSQILPDPSKPSKRS	DPB1-0101_DPA1-0202;DQB1-0602_DQA1-0102;DQB1-0303_DQA1-0201;DQB1-0302_DQA1-0301;DRB1_0401;DRB1_0404;DRB1_0901;DRB1_0411;DRB1_1303;DRB1_1001;DRB1_0405;DPB1-0402_DPA1-0103;DRB3_0101;DPB1-0201_DPA1-0103	0.856471041	0.854257585	0.727834415
orf1a polyprotein	4272	4296	FAVDAAKAYKDYLASGGQPITNCVK	DPB1-0101_DPA1-0201;DRB1_1502;DQB1-0502_DQA1-0102;DPB1-0202_DPA1-0103;DQB1-0302_DQA1-0301;DRB1_0901;DRB1_1601;DRB1_0411;DQB1-0501_DQA1-0101;DPB1-0501_DPA1-0201;DRB1_0701;DRB1_1501;DRB1_0101;DQB1-0301_DQA1-0505	0.825447398	0.853120385	0.762537172
orf1ab polyprotein	4272	4296	FAVDAAKAYKDYLASGGQPITNCVK	DPB1-0101_DPA1-0201;DRB1_1502;DQB1-0502_DQA1-0102;DPB1-0202_DPA1-0103;DQB1-0302_DQA1-0301;DRB1_0901;DRB1_1601;DRB1_0411;DQB1-0501_DQA1-0101;DPB1-0501_DPA1-0201;DRB1_0701;DRB1_1501;DRB1_0101;DQB1-0301_DQA1-0505	0.825447398	0.853120385	0.762537172
orf1ab polyprotein	1672	1696	NNCYLATALLTLQQIELKFNPPALQ	DPB1-0401_DPA1-0103;DPB1-0402_DPA1-0103;DRB1_0804;DRB1_1501;DRB4_0103	0.917485743	0.922116227	0.329893893
orf1a polyprotein	1672	1696	NNCYLATALLTLQQIELKFNPPALQ	DPB1-0401_DPA1-0103;DPB1-0402_DPA1-0103;DRB1_0804;DRB1_1501;DRB4_0103	0.917485743	0.922116227	0.329893893
surface glycoprotein	336	360	CPFGEVFNATRFASVYAWNRKRISN	DPB1-0401_DPA1-0103;DRB1_1102;DRB1_1301;DPB1-0101_DPA1-0103;DRB5_0102;DRB5_0101;DPB1-0301_DPA1-0103;DPB1-0402_DPA1-0103;DRB1_0804;DRB1_1104	0.931626588	0.931376976	0.256785556
orf1ab polyprotein	4268	4292	SFCAFAVDAAKAYKDYLASGGQPIT	DPB1-0101_DPA1-0201;DQB1-0502_DQA1-0102;DQB1-0302_DQA1-0301;DRB1_0901;DRB1_0411;DQB1-0501_DQA1-0101;DPB1-0501_DPA1-0201;DRB1_0701;DRB1_0402;DRB1_1501;DRB3_0101;DQB1-0301_DQA1-0505	0.85201161	0.865515874	0.676630916
orf1a polyprotein	4268	4292	SFCAFAVDAAKAYKDYLASGGQPIT	DPB1-0101_DPA1-0201;DQB1-0502_DQA1-0102;DQB1-0302_DQA1-0301;DRB1_0901;DRB1_0411;DQB1-0501_DQA1-0101;DPB1-0501_DPA1-0201;DRB1_0701;DRB1_0402;DRB1_1501;DRB3_0101;DQB1-0301_DQA1-0505	0.85201161	0.865515874	0.676630916
orf1ab polyprotein	477	501	LASFSASTSAFVETVKGLDYKAFKQ	DRB1_1602;DQB1-0602_DQA1-0102;DPB1-0202_DPA1-0103;DQB1-0302_DQA1-0301;DRB1_1601;DRB1_1202;DRB1_1101;DRB1_1303;DQB1-0601_DQA1-0103;DRB1_1201;DRB1_0803;DRB1_0701;DPB1-0201_DPA1-0103;DQB1-0202_DQA1-0201;DRB1_0801	0.827753566	0.827615494	0.783811954
orf1a polyprotein	477	501	LASFSASTSAFVETVKGLDYKAFKQ	DRB1_1602;DQB1-0602_DQA1-0102;DPB1-0202_DPA1-0103;DQB1-0302_DQA1-0301;DRB1_1601;DRB1_1202;DRB1_1101;DRB1_1303;DQB1-0601_DQA1-0103;DRB1_1201;DRB1_0803;DRB1_0701;DPB1-0201_DPA1-0103;DQB1-0202_DQA1-0201;DRB1_0801	0.827753566	0.827615494	0.783811954
orf1a polyprotein	608	632	LTSQWLTNIFGTVYEKLKPVLDWLE	DPB1-0401_DPA1-0103;DQB1-0201_DQA1-0501;DQB1-0302_DQA1-0301;DQB1-0201_DQA1-0201;DQB1-0604_DQA1-0102;DRB1_0405;DPB1-0402_DPA1-0103;DRB1_1001	0.893060377	0.890586906	0.570808112
orf1ab polyprotein	608	632	LTSQWLTNIFGTVYEKLKPVLDWLE	DPB1-0401_DPA1-0103;DQB1-0201_DQA1-0501;DQB1-0302_DQA1-0301;DQB1-0201_DQA1-0201;DQB1-0604_DQA1-0102;DRB1_0405;DPB1-0402_DPA1-0103;DRB1_1001	0.893060377	0.890586906	0.570808112
orf1ab polyprotein	4758	4782	LSFKELLVYAADPAMHAASGNLLLD	DRB1_1503;DPB1-0101_DPA1-0201;DRB1_1502;DPB1-0101_DPA1-0103;DRB3_0202;DRB1_0401;DRB1_0403;DRB1_0404;DRB5_0202;DRB1_0901;DRB1_0701;DRB1_1501;DRB3_0101	0.86052132	0.879364443	0.636463356
orf1ab polyprotein	4756	4780	SRLSFKELLVYAADPAMHAASGNLL	DRB1_1503;DPB1-0101_DPA1-0201;DRB1_1502;DPB1-0101_DPA1-0103;DRB3_0202;DRB1_0401;DRB1_0403;DRB1_0404;DRB5_0202;DRB1_0901;DRB1_0701;DRB1_1501;DRB3_0101	0.86052132	0.879364443	0.636463356
orf1ab polyprotein	4757	4781	RLSFKELLVYAADPAMHAASGNLLL	DRB1_1503;DPB1-0101_DPA1-0201;DRB1_1502;DPB1-0101_DPA1-0103;DRB3_0202;DRB1_0401;DRB1_0403;DRB1_0404;DRB5_0202;DRB1_0901;DRB1_0701;DRB1_1501;DRB3_0101	0.86052132	0.879364443	0.636463356
orf1ab polyprotein	2898	2922	TPSKLIEYTDFATSACVLAAECTIF	DPB1-0401_DPA1-0103;DQB1-0602_DQA1-0102;DQB1-0303_DQA1-0201;DRB1_1502;DQB1-0501_DQA1-0101;DRB1_1501;DQB1-0301_DQA1-0601	0.875175048	0.88310163	0.575360447
orf1a polyprotein	2898	2922	TPSKLIEYTDFATSACVLAAECTIF	DPB1-0401_DPA1-0103;DQB1-0602_DQA1-0102;DQB1-0303_DQA1-0201;DRB1_1502;DQB1-0501_DQA1-0101;DRB1_1501;DQB1-0301_DQA1-0601	0.875175048	0.88310163	0.575360447
orf1a polyprotein	2895	2919	ICYTPSKLIEYTDFATSACVLAAEC	DPB1-0401_DPA1-0103;DRB1_1503;DRB1_1502;DQB1-0501_DQA1-0101;DPB1-0402_DPA1-0103;DRB1_1501;DQB1-0301_DQA1-0601	0.8798687	0.882845758	0.602430117
orf1ab polyprotein	2895	2919	ICYTPSKLIEYTDFATSACVLAAEC	DPB1-0401_DPA1-0103;DRB1_1503;DRB1_1502;DQB1-0501_DQA1-0101;DPB1-0402_DPA1-0103;DRB1_1501;DQB1-0301_DQA1-0601	0.8798687	0.882845758	0.602430117
surface glycoprotein	128	152	IKVCEFQFCNDPFLGVYYHKNNKSW	DPB1-0401_DPA1-0103;DPB1-0201_DPA1-0103;DPB1-0402_DPA1-0103;DPB1-0202_DPA1-0103	0.891212171	0.891212171	0.514191
orf1ab polyprotein	6702	6726	LLIGLAKRFKESPFELEDFIPMDST	DPB1-0101_DPA1-0103;DPB1-0401_DPA1-0103;DPB1-0201_DPA1-0103;DPB1-0402_DPA1-0103	0.891212171	0.891212171	0.514191
orf1a polyprotein	2028	2052	LKSEDAQGMDNLACEDLKPVSEEVV	DPB1-0401_DPA1-0103;DPB1-0201_DPA1-0103;DPB1-0402_DPA1-0103;DPB1-0202_DPA1-0103	0.891212171	0.891212171	0.514191
orf1ab polyprotein	6701	6725	HLLIGLAKRFKESPFELEDFIPMDS	DPB1-0101_DPA1-0103;DPB1-0401_DPA1-0103;DPB1-0201_DPA1-0103;DPB1-0402_DPA1-0103	0.891212171	0.891212171	0.514191
orf1ab polyprotein	2028	2052	LKSEDAQGMDNLACEDLKPVSEEVV	DPB1-0401_DPA1-0103;DPB1-0201_DPA1-0103;DPB1-0402_DPA1-0103;DPB1-0202_DPA1-0103	0.891212171	0.891212171	0.514191
surface glycoprotein	129	153	KVCEFQFCNDPFLGVYYHKNNKSWM	DPB1-0401_DPA1-0103;DPB1-0201_DPA1-0103;DPB1-0402_DPA1-0103;DPB1-0202_DPA1-0103	0.891212171	0.891212171	0.514191
surface glycoprotein	127	151	VIKVCEFQFCNDPFLGVYYHKNNKS	DPB1-0401_DPA1-0103;DPB1-0201_DPA1-0103;DPB1-0402_DPA1-0103;DPB1-0202_DPA1-0103	0.891212171	0.891212171	0.514191
orf1ab polyprotein	6703	6727	LIGLAKRFKESPFELEDFIPMDSTV	DPB1-0101_DPA1-0103;DPB1-0401_DPA1-0103;DPB1-0201_DPA1-0103;DPB1-0402_DPA1-0103	0.891212171	0.891212171	0.514191
orf1ab polyprotein	6704	6728	IGLAKRFKESPFELEDFIPMDSTVK	DPB1-0101_DPA1-0103;DPB1-0401_DPA1-0103;DPB1-0201_DPA1-0103;DPB1-0402_DPA1-0103	0.891212171	0.891212171	0.514191
surface glycoprotein	333	357	TNLCPFGEVFNATRFASVYAWNRKR	DPB1-0401_DPA1-0103;DPB1-0101_DPA1-0103;DRB5_0102;DRB5_0101;DPB1-0301_DPA1-0103;DPB1-0402_DPA1-0103;DRB1_0804;DRB1_1104	0.921575212	0.921246486	0.219919782
surface glycoprotein	335	359	LCPFGEVFNATRFASVYAWNRKRIS	DPB1-0401_DPA1-0103;DPB1-0101_DPA1-0103;DRB5_0102;DRB5_0101;DPB1-0301_DPA1-0103;DPB1-0402_DPA1-0103;DRB1_0804;DRB1_1104	0.921575212	0.921246486	0.219919782
surface glycoprotein	334	358	NLCPFGEVFNATRFASVYAWNRKRI	DPB1-0401_DPA1-0103;DPB1-0101_DPA1-0103;DRB5_0102;DRB5_0101;DPB1-0301_DPA1-0103;DPB1-0402_DPA1-0103;DRB1_0804;DRB1_1104	0.921575212	0.921246486	0.219919782
orf1ab polyprotein	606	630	VQLTSQWLTNIFGTVYEKLKPVLDW	DPB1-0401_DPA1-0103;DQB1-0201_DQA1-0501;DQB1-0302_DQA1-0301;DQB1-0201_DQA1-0201;DRB1_0405;DPB1-0402_DPA1-0103	0.8800231	0.878266005	0.540991411
orf1a polyprotein	607	631	QLTSQWLTNIFGTVYEKLKPVLDWL	DPB1-0401_DPA1-0103;DQB1-0201_DQA1-0501;DQB1-0302_DQA1-0301;DQB1-0201_DQA1-0201;DRB1_0405;DPB1-0402_DPA1-0103	0.8800231	0.878266005	0.540991411
orf1a polyprotein	606	630	VQLTSQWLTNIFGTVYEKLKPVLDW	DPB1-0401_DPA1-0103;DQB1-0201_DQA1-0501;DQB1-0302_DQA1-0301;DQB1-0201_DQA1-0201;DRB1_0405;DPB1-0402_DPA1-0103	0.8800231	0.878266005	0.540991411
orf1ab polyprotein	607	631	QLTSQWLTNIFGTVYEKLKPVLDWL	DPB1-0401_DPA1-0103;DQB1-0201_DQA1-0501;DQB1-0302_DQA1-0301;DQB1-0201_DQA1-0201;DRB1_0405;DPB1-0402_DPA1-0103	0.8800231	0.878266005	0.540991411
orf1a polyprotein	2891	2915	AVGNICYTPSKLIEYTDFATSACVL	DPB1-0401_DPA1-0103;DRB1_1503;DRB1_1602;DRB1_1502;DRB1_1601;DQB1-0501_DQA1-0101;DRB1_0701;DRB1_1501	0.867636977	0.875434646	0.533140524
orf1ab polyprotein	2891	2915	AVGNICYTPSKLIEYTDFATSACVL	DPB1-0401_DPA1-0103;DRB1_1503;DRB1_1602;DRB1_1502;DRB1_1601;DQB1-0501_DQA1-0101;DRB1_0701;DRB1_1501	0.867636977	0.875434646	0.533140524
surface glycoprotein	303	327	LKSFTVEKGIYQTSNFRVQPTESIV	DPB1-0401_DPA1-0103;DRB1_1502;DPB1-0202_DPA1-0103;DRB5_0102;DRB1_0406;DRB1_0701;DPB1-0201_DPA1-0103	0.858982566	0.861603715	0.607832868
surface glycoprotein	302	326	TLKSFTVEKGIYQTSNFRVQPTESI	DPB1-0401_DPA1-0103;DRB1_1502;DPB1-0202_DPA1-0103;DRB5_0102;DRB1_0406;DRB1_0701;DPB1-0201_DPA1-0103	0.858982566	0.861603715	0.607832868
orf1ab polyprotein	5015	5039	DRAMPNMLRIMASLVLARKHTTCCS	DRB1_1503;DRB1_1602;DRB1_1502;DRB1_0401;DRB1_0404;DRB5_0102;DRB1_1601;DRB1_1303;DPB1-0501_DPA1-0201;DRB1_0406;DRB1_1201;DRB1_0102;DRB1_0701;DRB1_0402;DRB1_1501;DRB1_0101;DQB1-0301_DQA1-0505;DRB1_1406	0.824050687	0.862272691	0.637083445
orf1ab polyprotein	5013	5037	KCDRAMPNMLRIMASLVLARKHTTC	DRB1_1503;DRB1_1602;DRB1_1502;DRB1_0401;DRB1_0404;DRB5_0102;DRB1_1601;DRB1_1303;DPB1-0501_DPA1-0201;DRB1_0406;DRB1_1201;DRB1_0102;DRB1_0701;DRB1_0402;DRB1_1501;DRB1_0101;DQB1-0301_DQA1-0505;DRB1_1406	0.824050687	0.862272691	0.637083445
orf1ab polyprotein	5014	5038	CDRAMPNMLRIMASLVLARKHTTCC	DRB1_1503;DRB1_1602;DRB1_1502;DRB1_0401;DRB1_0404;DRB5_0102;DRB1_1601;DRB1_1303;DPB1-0501_DPA1-0201;DRB1_0406;DRB1_1201;DRB1_0102;DRB1_0701;DRB1_0402;DRB1_1501;DRB1_0101;DQB1-0301_DQA1-0505;DRB1_1406	0.824050687	0.862272691	0.637083445
orf1ab polyprotein	5016	5040	RAMPNMLRIMASLVLARKHTTCCSL	DRB1_1503;DRB1_1602;DRB1_1502;DRB1_0401;DRB1_0404;DRB5_0102;DRB1_1601;DRB1_1303;DPB1-0501_DPA1-0201;DRB1_0406;DRB1_1201;DRB1_0102;DRB1_0701;DRB1_0402;DRB1_1501;DRB1_0101;DQB1-0301_DQA1-0505;DRB1_1406	0.824050687	0.862272691	0.637083445
orf1ab polyprotein	5859	5883	SSQGSEYDYVIFTQTTETAHSCNVN	DPB1-0401_DPA1-0103;DRB1_0403;DRB1_0404;DRB1_0406;DPB1-0402_DPA1-0103;DRB4_0103	0.902829019	0.902215621	0.307884006
orf1ab polyprotein	5857	5881	VDSSQGSEYDYVIFTQTTETAHSCN	DPB1-0401_DPA1-0103;DRB1_0403;DRB1_0404;DRB1_0406;DPB1-0402_DPA1-0103;DRB4_0103	0.902829019	0.902215621	0.307884006
orf1ab polyprotein	5858	5882	DSSQGSEYDYVIFTQTTETAHSCNV	DPB1-0401_DPA1-0103;DRB1_0403;DRB1_0404;DRB1_0406;DPB1-0402_DPA1-0103;DRB4_0103	0.902829019	0.902215621	0.307884006
orf1a polyprotein	2890	2914	SAVGNICYTPSKLIEYTDFATSACV	DPB1-0401_DPA1-0103;DRB1_1602;DRB1_1502;DRB1_1601;DQB1-0501_DQA1-0101;DRB1_0701;DRB1_1501	0.861022582	0.875366832	0.53241865
orf1ab polyprotein	2890	2914	SAVGNICYTPSKLIEYTDFATSACV	DPB1-0401_DPA1-0103;DRB1_1602;DRB1_1502;DRB1_1601;DQB1-0501_DQA1-0101;DRB1_0701;DRB1_1501	0.861022582	0.875366832	0.53241865
ORF3a protein	105	129	FLYLYALVYFLQSINFVRIIMRLWL	DPB1-0401_DPA1-0103;DRB5_0102;DRB1_1202;DRB1_1201;DRB5_0101;DPB1-0402_DPA1-0103;DQB1-0301_DQA1-0505	0.896809203	0.894828026	0.364029717
ORF3a protein	104	128	PFLYLYALVYFLQSINFVRIIMRLW	DPB1-0401_DPA1-0103;DRB5_0102;DRB1_1202;DRB1_1201;DRB5_0101;DPB1-0402_DPA1-0103;DQB1-0301_DQA1-0505	0.896809203	0.894828026	0.364029717
surface glycoprotein	309	333	EKGIYQTSNFRVQPTESIVRFPNIT	DRB1_1502;DPB1-0202_DPA1-0103;DRB1_0401;DRB1_0406;DRB1_0302;DRB1_0405;DRB1_0701;DRB1_1501;DRB4_0103;DRB1_0101;DRB1_1001	0.822006297	0.862336442	0.625810876
orf1ab polyprotein	2894	2918	NICYTPSKLIEYTDFATSACVLAAE	DPB1-0401_DPA1-0103;DRB1_1503;DRB1_1502;DQB1-0501_DQA1-0101;DPB1-0402_DPA1-0103;DRB1_1501	0.879571696	0.882556115	0.480417742
orf1a polyprotein	2894	2918	NICYTPSKLIEYTDFATSACVLAAE	DPB1-0401_DPA1-0103;DRB1_1503;DRB1_1502;DQB1-0501_DQA1-0101;DPB1-0402_DPA1-0103;DRB1_1501	0.879571696	0.882556115	0.480417742
orf1ab polyprotein	5241	5265	KTDGTLMIERFVSLAIDAYPLTKHP	DPB1-0401_DPA1-0103;DPB1-0301_DPA1-0103;DPB1-0201_DPA1-0103;DPB1-0601_DPA1-0103	0.894270974	0.894270974	0.429975
orf1ab polyprotein	5242	5266	TDGTLMIERFVSLAIDAYPLTKHPN	DPB1-0401_DPA1-0103;DPB1-0301_DPA1-0103;DPB1-0201_DPA1-0103;DPB1-0601_DPA1-0103	0.894270974	0.894270974	0.429975
orf1ab polyprotein	5011	5035	YPKCDRAMPNMLRIMASLVLARKHT	DRB1_1503;DRB1_1602;DRB1_1502;DRB1_0401;DRB1_0404;DRB5_0102;DRB1_1601;DPB1-0501_DPA1-0201;DRB1_0406;DRB1_1201;DRB1_0102;DRB1_0701;DRB1_0402;DRB1_1501;DRB1_0101;DQB1-0301_DQA1-0505;DRB1_1406	0.813856368	0.855813441	0.636763559
orf1ab polyprotein	5012	5036	PKCDRAMPNMLRIMASLVLARKHTT	DRB1_1503;DRB1_1602;DRB1_1502;DRB1_0401;DRB1_0404;DRB5_0102;DRB1_1601;DPB1-0501_DPA1-0201;DRB1_0406;DRB1_1201;DRB1_0102;DRB1_0701;DRB1_0402;DRB1_1501;DRB1_0101;DQB1-0301_DQA1-0505;DRB1_1406	0.813856368	0.855813441	0.636763559
orf1ab polyprotein	5856	5880	TVDSSQGSEYDYVIFTQTTETAHSC	DPB1-0401_DPA1-0103;DRB1_0404;DRB1_0406;DPB1-0402_DPA1-0103;DRB4_0103	0.900873194	0.901044058	0.255911596
ORF7a protein	46	70	FHPLADNKFALTCFSTQFAFACPDG	DPB1-0401_DPA1-0103;DQB1-0602_DQA1-0102;DRB1_0404;DPB1-0402_DPA1-0103;DRB1_0402;DQB1-0202_DQA1-0201	0.897172048	0.897708837	0.284137734
orf1ab polyprotein	1758	1782	QQTTLKGVEAVMYMGTLSYEQFKKG	DPB1-0401_DPA1-0103;DRB1_1102;DRB1_1301;DPB1-0202_DPA1-0103;DRB1_0404;DRB1_0407;DRB1_1202;DRB1_1201;DPB1-0402_DPA1-0103;DRB1_0402;DRB1_1406;DQB1-0202_DQA1-0201	0.885517681	0.880186581	0.420470301
orf1a polyprotein	1759	1783	QTTLKGVEAVMYMGTLSYEQFKKGV	DPB1-0401_DPA1-0103;DRB1_1102;DRB1_1301;DPB1-0202_DPA1-0103;DRB1_0404;DRB1_0407;DRB1_1202;DRB1_1201;DPB1-0402_DPA1-0103;DRB1_0402;DRB1_1406;DQB1-0202_DQA1-0201	0.885517681	0.880186581	0.420470301
orf1ab polyprotein	1759	1783	QTTLKGVEAVMYMGTLSYEQFKKGV	DPB1-0401_DPA1-0103;DRB1_1102;DRB1_1301;DPB1-0202_DPA1-0103;DRB1_0404;DRB1_0407;DRB1_1202;DRB1_1201;DPB1-0402_DPA1-0103;DRB1_0402;DRB1_1406;DQB1-0202_DQA1-0201	0.885517681	0.880186581	0.420470301
orf1a polyprotein	1758	1782	QQTTLKGVEAVMYMGTLSYEQFKKG	DPB1-0401_DPA1-0103;DRB1_1102;DRB1_1301;DPB1-0202_DPA1-0103;DRB1_0404;DRB1_0407;DRB1_1202;DRB1_1201;DPB1-0402_DPA1-0103;DRB1_0402;DRB1_1406;DQB1-0202_DQA1-0201	0.885517681	0.880186581	0.420470301
orf1ab polyprotein	1757	1781	QQQTTLKGVEAVMYMGTLSYEQFKK	DPB1-0401_DPA1-0103;DRB1_1102;DRB1_1301;DPB1-0202_DPA1-0103;DRB1_0404;DRB1_0407;DRB1_1202;DRB1_1201;DPB1-0402_DPA1-0103;DRB1_0402;DRB1_1406;DQB1-0202_DQA1-0201	0.885517681	0.880186581	0.420470301
orf1a polyprotein	1757	1781	QQQTTLKGVEAVMYMGTLSYEQFKK	DPB1-0401_DPA1-0103;DRB1_1102;DRB1_1301;DPB1-0202_DPA1-0103;DRB1_0404;DRB1_0407;DRB1_1202;DRB1_1201;DPB1-0402_DPA1-0103;DRB1_0402;DRB1_1406;DQB1-0202_DQA1-0201	0.885517681	0.880186581	0.420470301
orf1a polyprotein	642	666	LRDGWEIVKFISTCACEIVGGQIVT	DQB1-0201_DQA1-0501;DRB1_1503;DQB1-0303_DQA1-0201;DPB1-1301_DPA1-0201;DPB1-0101_DPA1-0103;DRB1_0403;DRB1_0404;DRB1_0402;DRB1_0406;DPB1-0402_DPA1-0103;DRB1_0701;DRB1_1501;DQB1-0603_DQA1-0103;DQB1-0202_DQA1-0201	0.841825257	0.854201907	0.561848292
orf1ab polyprotein	641	665	FLRDGWEIVKFISTCACEIVGGQIV	DQB1-0201_DQA1-0501;DRB1_1503;DQB1-0303_DQA1-0201;DPB1-1301_DPA1-0201;DPB1-0101_DPA1-0103;DRB1_0403;DRB1_0404;DRB1_0402;DRB1_0406;DPB1-0402_DPA1-0103;DRB1_0701;DRB1_1501;DQB1-0603_DQA1-0103;DQB1-0202_DQA1-0201	0.841825257	0.854201907	0.561848292
orf1ab polyprotein	642	666	LRDGWEIVKFISTCACEIVGGQIVT	DQB1-0201_DQA1-0501;DRB1_1503;DQB1-0303_DQA1-0201;DPB1-1301_DPA1-0201;DPB1-0101_DPA1-0103;DRB1_0403;DRB1_0404;DRB1_0402;DRB1_0406;DPB1-0402_DPA1-0103;DRB1_0701;DRB1_1501;DQB1-0603_DQA1-0103;DQB1-0202_DQA1-0201	0.841825257	0.854201907	0.561848292
orf1a polyprotein	641	665	FLRDGWEIVKFISTCACEIVGGQIV	DQB1-0201_DQA1-0501;DRB1_1503;DQB1-0303_DQA1-0201;DPB1-1301_DPA1-0201;DPB1-0101_DPA1-0103;DRB1_0403;DRB1_0404;DRB1_0402;DRB1_0406;DPB1-0402_DPA1-0103;DRB1_0701;DRB1_1501;DQB1-0603_DQA1-0103;DQB1-0202_DQA1-0201	0.841825257	0.854201907	0.561848292
ORF7a protein	41	65	EGNSPFHPLADNKFALTCFSTQFAF	DPB1-0401_DPA1-0103;DPB1-0201_DPA1-0103;DQB1-0602_DQA1-0102;DQB1-0502_DQA1-0102	0.859501437	0.859501437	0.538195488
orf1ab polyprotein	5233	5257	GCFVDDIVKTDGTLMIERFVSLAID	DPB1-0401_DPA1-0103;DRB1_0301;DRB1_1405;DRB1_0701;DRB1_1404;DRB3_0301;DQB1-0202_DQA1-0201;DPB1-0601_DPA1-0103	0.872873	0.884218679	0.387580454
orf1ab polyprotein	5855	5879	QTVDSSQGSEYDYVIFTQTTETAHS	DPB1-0401_DPA1-0103;DRB4_0103;DRB1_0404;DPB1-0402_DPA1-0103	0.900462847	0.900992695	0.223919081
ORF7a protein	38	62	GTYEGNSPFHPLADNKFALTCFSTQ	DPB1-0401_DPA1-0103;DRB3_0202;DPB1-0201_DPA1-0103;DQB1-0502_DQA1-0102	0.865854352	0.865854352	0.499904934
orf1ab polyprotein	5768	5792	CPAEIVDTVSALVYDNKLKAHKDKS	DQB1-0303_DQA1-0201;DRB1_0301;DQB1-0302_DQA1-0301;DQB1-0201_DQA1-0201;DRB1_1101;DRB1_1303;DRB1_0406;DQB1-0601_DQA1-0103;DRB1_0302;DRB1_0701;DRB1_1104;DQB1-0301_DQA1-0505;DQB1-0202_DQA1-0201	0.828097926	0.841922007	0.589003099
ORF7a protein	42	66	GNSPFHPLADNKFALTCFSTQFAFA	DPB1-0401_DPA1-0103;DRB1_0404;DPB1-0201_DPA1-0103;DQB1-0602_DQA1-0102	0.865078417	0.865796619	0.463155782
orf1a polyprotein	476	500	ILASFSASTSAFVETVKGLDYKAFK	DRB1_1602;DQB1-0602_DQA1-0102;DQB1-0302_DQA1-0301;DRB1_1601;DRB1_0901;DRB1_1202;DRB1_1101;DRB1_1303;DQB1-0601_DQA1-0103;DRB1_1201;DRB1_0803;DRB1_0701;DQB1-0202_DQA1-0201;DRB1_0801	0.786373114	0.780446054	0.759673665
orf1ab polyprotein	476	500	ILASFSASTSAFVETVKGLDYKAFK	DRB1_1602;DQB1-0602_DQA1-0102;DQB1-0302_DQA1-0301;DRB1_1601;DRB1_0901;DRB1_1202;DRB1_1101;DRB1_1303;DQB1-0601_DQA1-0103;DRB1_1201;DRB1_0803;DRB1_0701;DQB1-0202_DQA1-0201;DRB1_0801	0.786373114	0.780446054	0.759673665
ORF3a protein	108	132	LYALVYFLQSINFVRIIMRLWLCWK	DPB1-0401_DPA1-0103;DRB5_0102;DRB1_1202;DRB1_0406;DRB1_1201;DRB5_0101;DRB1_1401;DPB1-0402_DPA1-0103;DRB1_1404	0.874866266	0.872200806	0.452907685
orf1ab polyprotein	4273	4297	AVDAAKAYKDYLASGGQPITNCVKM	DPB1-0101_DPA1-0201;DRB1_1502;DQB1-0502_DQA1-0102;DPB1-0202_DPA1-0103;DRB1_0901;DRB1_1601;DQB1-0501_DQA1-0101;DPB1-0501_DPA1-0201;DRB1_0701;DRB1_1501;DRB1_0101;DQB1-0301_DQA1-0505	0.768513083	0.807718563	0.720156671
orf1a polyprotein	4273	4297	AVDAAKAYKDYLASGGQPITNCVKM	DPB1-0101_DPA1-0201;DRB1_1502;DQB1-0502_DQA1-0102;DPB1-0202_DPA1-0103;DRB1_0901;DRB1_1601;DQB1-0501_DQA1-0101;DPB1-0501_DPA1-0201;DRB1_0701;DRB1_1501;DRB1_0101;DQB1-0301_DQA1-0505	0.768513083	0.807718563	0.720156671
orf1ab polyprotein	1664	1688	LTSIKWADNNCYLATALLTLQQIEL	DPB1-0401_DPA1-0103;DRB1_0406;DRB4_0103;DPB1-0402_DPA1-0103	0.89380939	0.893437991	0.241966767
orf1ab polyprotein	1663	1687	GLTSIKWADNNCYLATALLTLQQIE	DPB1-0401_DPA1-0103;DRB1_0406;DRB4_0103;DPB1-0402_DPA1-0103	0.89380939	0.893437991	0.241966767
orf1a polyprotein	1664	1688	LTSIKWADNNCYLATALLTLQQIEL	DPB1-0401_DPA1-0103;DRB1_0406;DRB4_0103;DPB1-0402_DPA1-0103	0.89380939	0.893437991	0.241966767
orf1a polyprotein	1663	1687	GLTSIKWADNNCYLATALLTLQQIE	DPB1-0401_DPA1-0103;DRB1_0406;DRB4_0103;DPB1-0402_DPA1-0103	0.89380939	0.893437991	0.241966767
orf1ab polyprotein	1665	1689	TSIKWADNNCYLATALLTLQQIELK	DPB1-0401_DPA1-0103;DRB1_0406;DRB4_0103;DPB1-0402_DPA1-0103	0.89380939	0.893437991	0.241966767
orf1a polyprotein	1665	1689	TSIKWADNNCYLATALLTLQQIELK	DPB1-0401_DPA1-0103;DRB1_0406;DRB4_0103;DPB1-0402_DPA1-0103	0.89380939	0.893437991	0.241966767
orf1ab polyprotein	5126	5150	NRDVDTDFVNEFYAYLRKHFSMMIL	DPB1-0401_DPA1-0103;DRB5_0202;DRB1_1101;DRB1_1302;DPB1-0402_DPA1-0103;DQB1-0202_DQA1-0201;DRB1_0801	0.879883998	0.880611041	0.348279611
orf1ab polyprotein	5231	5255	GAGCFVDDIVKTDGTLMIERFVSLA	DPB1-0401_DPA1-0103;DRB1_0301;DRB1_1405;DRB1_0701;DRB1_1404;DRB3_0301;DQB1-0202_DQA1-0201	0.864317712	0.876426922	0.371961454
orf1ab polyprotein	5232	5256	AGCFVDDIVKTDGTLMIERFVSLAI	DPB1-0401_DPA1-0103;DRB1_0301;DRB1_1405;DRB1_0701;DRB1_1404;DRB3_0301;DQB1-0202_DQA1-0201	0.864317712	0.876426922	0.371961454
ORF3a protein	107	131	YLYALVYFLQSINFVRIIMRLWLCW	DPB1-0401_DPA1-0103;DRB5_0102;DRB1_1202;DRB1_1201;DRB5_0101;DRB1_1401;DPB1-0402_DPA1-0103;DRB1_1404	0.87434054	0.872134246	0.425427131
orf1ab polyprotein	5767	5791	RCPAEIVDTVSALVYDNKLKAHKDK	DQB1-0303_DQA1-0201;DRB1_0301;DQB1-0302_DQA1-0301;DQB1-0201_DQA1-0201;DRB1_1101;DRB1_0406;DQB1-0601_DQA1-0103;DRB1_0701;DRB1_1104;DQB1-0301_DQA1-0505;DQB1-0202_DQA1-0201	0.815440008	0.836915327	0.588710094
orf1a polyprotein	1671	1695	DNNCYLATALLTLQQIELKFNPPAL	DPB1-0401_DPA1-0103;DRB4_0103;DPB1-0402_DPA1-0103	0.89338469	0.89338469	0.209679
orf1ab polyprotein	1669	1693	WADNNCYLATALLTLQQIELKFNPP	DPB1-0401_DPA1-0103;DRB4_0103;DPB1-0402_DPA1-0103	0.89338469	0.89338469	0.209679
orf1ab polyprotein	1670	1694	ADNNCYLATALLTLQQIELKFNPPA	DPB1-0401_DPA1-0103;DRB4_0103;DPB1-0402_DPA1-0103	0.89338469	0.89338469	0.209679
orf1a polyprotein	1669	1693	WADNNCYLATALLTLQQIELKFNPP	DPB1-0401_DPA1-0103;DRB4_0103;DPB1-0402_DPA1-0103	0.89338469	0.89338469	0.209679
orf1ab polyprotein	1671	1695	DNNCYLATALLTLQQIELKFNPPAL	DPB1-0401_DPA1-0103;DRB4_0103;DPB1-0402_DPA1-0103	0.89338469	0.89338469	0.209679
orf1ab polyprotein	1667	1691	IKWADNNCYLATALLTLQQIELKFN	DPB1-0401_DPA1-0103;DRB4_0103;DPB1-0402_DPA1-0103	0.89338469	0.89338469	0.209679
orf1a polyprotein	1667	1691	IKWADNNCYLATALLTLQQIELKFN	DPB1-0401_DPA1-0103;DRB4_0103;DPB1-0402_DPA1-0103	0.89338469	0.89338469	0.209679
orf1a polyprotein	1670	1694	ADNNCYLATALLTLQQIELKFNPPA	DPB1-0401_DPA1-0103;DRB4_0103;DPB1-0402_DPA1-0103	0.89338469	0.89338469	0.209679
orf1a polyprotein	1666	1690	SIKWADNNCYLATALLTLQQIELKF	DPB1-0401_DPA1-0103;DRB4_0103;DPB1-0402_DPA1-0103	0.89338469	0.89338469	0.209679
orf1ab polyprotein	1668	1692	KWADNNCYLATALLTLQQIELKFNP	DPB1-0401_DPA1-0103;DRB4_0103;DPB1-0402_DPA1-0103	0.89338469	0.89338469	0.209679
orf1a polyprotein	1668	1692	KWADNNCYLATALLTLQQIELKFNP	DPB1-0401_DPA1-0103;DRB4_0103;DPB1-0402_DPA1-0103	0.89338469	0.89338469	0.209679
orf1ab polyprotein	1666	1690	SIKWADNNCYLATALLTLQQIELKF	DPB1-0401_DPA1-0103;DRB4_0103;DPB1-0402_DPA1-0103	0.89338469	0.89338469	0.209679
orf1a polyprotein	478	502	ASFSASTSAFVETVKGLDYKAFKQI	DRB1_1602;DQB1-0602_DQA1-0102;DPB1-0202_DPA1-0103;DRB1_1601;DRB1_1202;DRB1_1101;DRB1_1303;DQB1-0601_DQA1-0103;DRB1_1201;DRB1_0803;DRB1_0701;DPB1-0201_DPA1-0103;DQB1-0202_DQA1-0201;DRB1_0801	0.771752618	0.771569655	0.746139381
orf1ab polyprotein	478	502	ASFSASTSAFVETVKGLDYKAFKQI	DRB1_1602;DQB1-0602_DQA1-0102;DPB1-0202_DPA1-0103;DRB1_1601;DRB1_1202;DRB1_1101;DRB1_1303;DQB1-0601_DQA1-0103;DRB1_1201;DRB1_0803;DRB1_0701;DPB1-0201_DPA1-0103;DQB1-0202_DQA1-0201;DRB1_0801	0.771752618	0.771569655	0.746139381
orf1ab polyprotein	2704	2728	AKSHNIALIWNVKDFMSLSEQLRKQ	DQB1-0201_DQA1-0501;DRB1_0410;DPB1-0202_DPA1-0103;DQB1-0302_DQA1-0301;DQB1-0201_DQA1-0201;DRB5_0102;DRB1_0411;DRB5_0101;DRB1_1402;DPB1-1101_DPA1-0201;DRB1_1406;DPB1-0201_DPA1-0103;DQB1-0603_DQA1-0103;DQB1-0202_DQA1-0201	0.829587247	0.824585319	0.575366509
orf1a polyprotein	2704	2728	AKSHNIALIWNVKDFMSLSEQLRKQ	DQB1-0201_DQA1-0501;DRB1_0410;DPB1-0202_DPA1-0103;DQB1-0302_DQA1-0301;DQB1-0201_DQA1-0201;DRB5_0102;DRB1_0411;DRB5_0101;DRB1_1402;DPB1-1101_DPA1-0201;DRB1_1406;DPB1-0201_DPA1-0103;DQB1-0603_DQA1-0103;DQB1-0202_DQA1-0201	0.829587247	0.824585319	0.575366509
orf1a polyprotein	2705	2729	KSHNIALIWNVKDFMSLSEQLRKQI	DQB1-0201_DQA1-0501;DRB1_0410;DPB1-0202_DPA1-0103;DQB1-0302_DQA1-0301;DQB1-0201_DQA1-0201;DRB5_0102;DRB5_0101;DRB1_1402;DPB1-1101_DPA1-0201;DRB1_1406;DPB1-0201_DPA1-0103;DQB1-0603_DQA1-0103;DQB1-0202_DQA1-0201	0.82811502	0.824585319	0.575366509
orf1a polyprotein	2706	2730	SHNIALIWNVKDFMSLSEQLRKQIR	DQB1-0201_DQA1-0501;DRB1_0410;DPB1-0202_DPA1-0103;DQB1-0302_DQA1-0301;DQB1-0201_DQA1-0201;DRB5_0102;DRB5_0101;DRB1_1402;DPB1-1101_DPA1-0201;DRB1_1406;DPB1-0201_DPA1-0103;DQB1-0603_DQA1-0103;DQB1-0202_DQA1-0201	0.82811502	0.824585319	0.575366509
orf1ab polyprotein	2706	2730	SHNIALIWNVKDFMSLSEQLRKQIR	DQB1-0201_DQA1-0501;DRB1_0410;DPB1-0202_DPA1-0103;DQB1-0302_DQA1-0301;DQB1-0201_DQA1-0201;DRB5_0102;DRB5_0101;DRB1_1402;DPB1-1101_DPA1-0201;DRB1_1406;DPB1-0201_DPA1-0103;DQB1-0603_DQA1-0103;DQB1-0202_DQA1-0201	0.82811502	0.824585319	0.575366509
orf1a polyprotein	2707	2731	HNIALIWNVKDFMSLSEQLRKQIRS	DQB1-0201_DQA1-0501;DRB1_0410;DPB1-0202_DPA1-0103;DQB1-0302_DQA1-0301;DQB1-0201_DQA1-0201;DRB5_0102;DRB5_0101;DRB1_1402;DPB1-1101_DPA1-0201;DRB1_1406;DPB1-0201_DPA1-0103;DQB1-0603_DQA1-0103;DQB1-0202_DQA1-0201	0.82811502	0.824585319	0.575366509
orf1ab polyprotein	2707	2731	HNIALIWNVKDFMSLSEQLRKQIRS	DQB1-0201_DQA1-0501;DRB1_0410;DPB1-0202_DPA1-0103;DQB1-0302_DQA1-0301;DQB1-0201_DQA1-0201;DRB5_0102;DRB5_0101;DRB1_1402;DPB1-1101_DPA1-0201;DRB1_1406;DPB1-0201_DPA1-0103;DQB1-0603_DQA1-0103;DQB1-0202_DQA1-0201	0.82811502	0.824585319	0.575366509
orf1ab polyprotein	2705	2729	KSHNIALIWNVKDFMSLSEQLRKQI	DQB1-0201_DQA1-0501;DRB1_0410;DPB1-0202_DPA1-0103;DQB1-0302_DQA1-0301;DQB1-0201_DQA1-0201;DRB5_0102;DRB5_0101;DRB1_1402;DPB1-1101_DPA1-0201;DRB1_1406;DPB1-0201_DPA1-0103;DQB1-0603_DQA1-0103;DQB1-0202_DQA1-0201	0.82811502	0.824585319	0.575366509
orf1a polyprotein	2709	2733	IALIWNVKDFMSLSEQLRKQIRSAA	DQB1-0201_DQA1-0501;DPB1-0202_DPA1-0103;DQB1-0302_DQA1-0301;DQB1-0201_DQA1-0201;DRB5_0102;DRB5_0101;DRB1_1402;DPB1-1101_DPA1-0201;DRB1_1406;DPB1-0201_DPA1-0103;DQB1-0603_DQA1-0103;DQB1-0202_DQA1-0201	0.827708888	0.824585319	0.575366509
orf1a polyprotein	2708	2732	NIALIWNVKDFMSLSEQLRKQIRSA	DQB1-0201_DQA1-0501;DPB1-0202_DPA1-0103;DQB1-0302_DQA1-0301;DQB1-0201_DQA1-0201;DRB5_0102;DRB5_0101;DRB1_1402;DPB1-1101_DPA1-0201;DRB1_1406;DPB1-0201_DPA1-0103;DQB1-0603_DQA1-0103;DQB1-0202_DQA1-0201	0.827708888	0.824585319	0.575366509
orf1ab polyprotein	2709	2733	IALIWNVKDFMSLSEQLRKQIRSAA	DQB1-0201_DQA1-0501;DPB1-0202_DPA1-0103;DQB1-0302_DQA1-0301;DQB1-0201_DQA1-0201;DRB5_0102;DRB5_0101;DRB1_1402;DPB1-1101_DPA1-0201;DRB1_1406;DPB1-0201_DPA1-0103;DQB1-0603_DQA1-0103;DQB1-0202_DQA1-0201	0.827708888	0.824585319	0.575366509
orf1ab polyprotein	2708	2732	NIALIWNVKDFMSLSEQLRKQIRSA	DQB1-0201_DQA1-0501;DPB1-0202_DPA1-0103;DQB1-0302_DQA1-0301;DQB1-0201_DQA1-0201;DRB5_0102;DRB5_0101;DRB1_1402;DPB1-1101_DPA1-0201;DRB1_1406;DPB1-0201_DPA1-0103;DQB1-0603_DQA1-0103;DQB1-0202_DQA1-0201	0.827708888	0.824585319	0.575366509
surface glycoprotein	33	57	TRGVYYPDKVFRSSVLHSTQDLFLP	DQB1-0603_DQA1-0103;DQB1-0303_DQA1-0201;DQB1-0602_DQA1-0102;DQB1-0604_DQA1-0102;DPB1-0402_DPA1-0103;DPB1-0201_DPA1-0103;DQB1-0301_DQA1-0505;DQB1-0202_DQA1-0201	0.856820741	0.856820741	0.493864509
surface glycoprotein	34	58	RGVYYPDKVFRSSVLHSTQDLFLPF	DQB1-0603_DQA1-0103;DQB1-0303_DQA1-0201;DQB1-0602_DQA1-0102;DQB1-0604_DQA1-0102;DPB1-0402_DPA1-0103;DPB1-0201_DPA1-0103;DQB1-0301_DQA1-0505;DQB1-0202_DQA1-0201	0.856820741	0.856820741	0.493864509
surface glycoprotein	35	59	GVYYPDKVFRSSVLHSTQDLFLPFF	DQB1-0603_DQA1-0103;DQB1-0303_DQA1-0201;DQB1-0602_DQA1-0102;DQB1-0604_DQA1-0102;DPB1-0402_DPA1-0103;DPB1-0201_DPA1-0103;DQB1-0301_DQA1-0505;DQB1-0202_DQA1-0201	0.856820741	0.856820741	0.493864509
surface glycoprotein	37	61	YYPDKVFRSSVLHSTQDLFLPFFSN	DQB1-0603_DQA1-0103;DQB1-0303_DQA1-0201;DQB1-0602_DQA1-0102;DQB1-0604_DQA1-0102;DPB1-0402_DPA1-0103;DPB1-0201_DPA1-0103;DQB1-0301_DQA1-0505;DQB1-0202_DQA1-0201	0.856820741	0.856820741	0.493864509
surface glycoprotein	38	62	YPDKVFRSSVLHSTQDLFLPFFSNV	DQB1-0603_DQA1-0103;DQB1-0303_DQA1-0201;DQB1-0602_DQA1-0102;DQB1-0604_DQA1-0102;DPB1-0402_DPA1-0103;DPB1-0201_DPA1-0103;DQB1-0301_DQA1-0505;DQB1-0202_DQA1-0201	0.856820741	0.856820741	0.493864509
surface glycoprotein	36	60	VYYPDKVFRSSVLHSTQDLFLPFFS	DQB1-0603_DQA1-0103;DQB1-0303_DQA1-0201;DQB1-0602_DQA1-0102;DQB1-0604_DQA1-0102;DPB1-0402_DPA1-0103;DPB1-0201_DPA1-0103;DQB1-0301_DQA1-0505;DQB1-0202_DQA1-0201	0.856820741	0.856820741	0.493864509
surface glycoprotein	1013	1037	IRAAEIRASANLAATKMSECVLGQS	DPB1-0101_DPA1-0202;DPB1-0401_DPA1-0103;DRB1_0403;DRB1_0404;DRB1_0407;DRB1_0406;DPB1-0402_DPA1-0103;DRB1_1501	0.864201997	0.867119458	0.421971752
surface glycoprotein	1014	1038	RAAEIRASANLAATKMSECVLGQSK	DPB1-0101_DPA1-0202;DPB1-0401_DPA1-0103;DRB1_0403;DRB1_0404;DRB1_0407;DRB1_0406;DPB1-0402_DPA1-0103;DRB1_1501	0.864201997	0.867119458	0.421971752
orf1ab polyprotein	639	663	VEFLRDGWEIVKFISTCACEIVGGQ	DQB1-0201_DQA1-0501;DRB1_1503;DQB1-0303_DQA1-0201;DPB1-1301_DPA1-0201;DPB1-0101_DPA1-0103;DRB1_0403;DRB1_0404;DRB1_0402;DRB1_0406;DPB1-0402_DPA1-0103;DRB1_0701;DRB1_1501;DQB1-0202_DQA1-0201	0.8134071	0.828007377	0.561848292
orf1a polyprotein	640	664	EFLRDGWEIVKFISTCACEIVGGQI	DQB1-0201_DQA1-0501;DRB1_1503;DQB1-0303_DQA1-0201;DPB1-1301_DPA1-0201;DPB1-0101_DPA1-0103;DRB1_0403;DRB1_0404;DRB1_0402;DRB1_0406;DPB1-0402_DPA1-0103;DRB1_0701;DRB1_1501;DQB1-0202_DQA1-0201	0.8134071	0.828007377	0.561848292
orf1a polyprotein	639	663	VEFLRDGWEIVKFISTCACEIVGGQ	DQB1-0201_DQA1-0501;DRB1_1503;DQB1-0303_DQA1-0201;DPB1-1301_DPA1-0201;DPB1-0101_DPA1-0103;DRB1_0403;DRB1_0404;DRB1_0402;DRB1_0406;DPB1-0402_DPA1-0103;DRB1_0701;DRB1_1501;DQB1-0202_DQA1-0201	0.8134071	0.828007377	0.561848292
orf1ab polyprotein	640	664	EFLRDGWEIVKFISTCACEIVGGQI	DQB1-0201_DQA1-0501;DRB1_1503;DQB1-0303_DQA1-0201;DPB1-1301_DPA1-0201;DPB1-0101_DPA1-0103;DRB1_0403;DRB1_0404;DRB1_0402;DRB1_0406;DPB1-0402_DPA1-0103;DRB1_0701;DRB1_1501;DQB1-0202_DQA1-0201	0.8134071	0.828007377	0.561848292
membrane glycoprotein	162	186	KDLPKEITVATSRTLSYYKLGASQR	DRB1_1503;DRB1_1602;DRB1_1301;DQB1-0303_DQA1-0201;DQB1-0502_DQA1-0102;DRB1_0101;DRB1_0403;DRB1_0404;DRB1_1601;DRB5_0102;DRB1_0901;DRB1_0406;DRB1_0102;DRB1_0402;DRB1_1501;DRB1_1406;DQB1-0301_DQA1-0505;DQB1-0202_DQA1-0201	0.80234689	0.814186084	0.610991649
ORF3a protein	106	130	LYLYALVYFLQSINFVRIIMRLWLC	DPB1-0401_DPA1-0103;DRB5_0102;DRB1_1202;DRB1_1201;DRB5_0101;DPB1-0402_DPA1-0103;DRB1_1404	0.868405805	0.865502764	0.392570853
surface glycoprotein	795	819	KDFGGFNFSQILPDPSKPSKRSFIE	DPB1-0101_DPA1-0202;DQB1-0602_DQA1-0102;DQB1-0303_DQA1-0201;DRB1_0301;DQB1-0302_DQA1-0301;DRB1_0401;DRB1_0404;DRB1_0901;DRB1_0411;DRB1_1303;DRB1_0405;DRB3_0101;DRB1_1001	0.810707382	0.820403595	0.565891562
surface glycoprotein	796	820	DFGGFNFSQILPDPSKPSKRSFIED	DPB1-0101_DPA1-0202;DQB1-0602_DQA1-0102;DQB1-0303_DQA1-0201;DRB1_0301;DQB1-0302_DQA1-0301;DRB1_0401;DRB1_0404;DRB1_0901;DRB1_0411;DRB1_1303;DRB1_0405;DRB3_0101;DRB1_1001	0.810707382	0.820403595	0.565891562
surface glycoprotein	797	821	FGGFNFSQILPDPSKPSKRSFIEDL	DPB1-0101_DPA1-0202;DQB1-0602_DQA1-0102;DQB1-0303_DQA1-0201;DRB1_0301;DQB1-0302_DQA1-0301;DRB1_0401;DRB1_0404;DRB1_0901;DRB1_0411;DRB1_1303;DRB1_0405;DRB3_0101;DRB1_1001	0.810707382	0.820403595	0.565891562
surface glycoprotein	82	106	PVLPFNDGVYFASTEKSNIIRGWIF	DQB1-0201_DQA1-0501;DQB1-0602_DQA1-0102;DQB1-0302_DQA1-0301;DRB1_0403;DRB1_0404;DRB1_1405;DRB1_1401;DQB1-0301_DQA1-0505;DQB1-0202_DQA1-0201	0.863774953	0.863735716	0.42338697
surface glycoprotein	84	108	LPFNDGVYFASTEKSNIIRGWIFGT	DQB1-0201_DQA1-0501;DQB1-0602_DQA1-0102;DQB1-0302_DQA1-0301;DRB1_0403;DRB1_0404;DRB1_1405;DRB1_1401;DQB1-0301_DQA1-0505;DQB1-0202_DQA1-0201	0.863774953	0.863735716	0.42338697
surface glycoprotein	81	105	NPVLPFNDGVYFASTEKSNIIRGWI	DQB1-0201_DQA1-0501;DQB1-0602_DQA1-0102;DQB1-0302_DQA1-0301;DRB1_0403;DRB1_0404;DRB1_1405;DRB1_1401;DQB1-0301_DQA1-0505;DQB1-0202_DQA1-0201	0.863774953	0.863735716	0.42338697
surface glycoprotein	80	104	DNPVLPFNDGVYFASTEKSNIIRGW	DQB1-0201_DQA1-0501;DQB1-0602_DQA1-0102;DQB1-0302_DQA1-0301;DRB1_0403;DRB1_0404;DRB1_1405;DRB1_1401;DQB1-0301_DQA1-0505;DQB1-0202_DQA1-0201	0.863774953	0.863735716	0.42338697
surface glycoprotein	83	107	VLPFNDGVYFASTEKSNIIRGWIFG	DQB1-0201_DQA1-0501;DQB1-0602_DQA1-0102;DQB1-0302_DQA1-0301;DRB1_0403;DRB1_0404;DRB1_1405;DRB1_1401;DQB1-0301_DQA1-0505;DQB1-0202_DQA1-0201	0.863774953	0.863735716	0.42338697
orf1ab polyprotein	2889	2913	FSAVGNICYTPSKLIEYTDFATSAC	DPB1-0401_DPA1-0103;DRB1_1503;DRB1_1602;DRB1_1502;DRB1_1601;DRB1_0701;DRB1_1501	0.833457921	0.843269121	0.499698361
orf1a polyprotein	2889	2913	FSAVGNICYTPSKLIEYTDFATSAC	DPB1-0401_DPA1-0103;DRB1_1503;DRB1_1602;DRB1_1502;DRB1_1601;DRB1_0701;DRB1_1501	0.833457921	0.843269121	0.499698361
orf1ab polyprotein	2887	2911	RVFSAVGNICYTPSKLIEYTDFATS	DPB1-0401_DPA1-0103;DRB1_1503;DRB1_1602;DRB1_1502;DRB1_1601;DRB1_0701;DRB1_1501	0.833457921	0.843269121	0.499698361
orf1a polyprotein	2887	2911	RVFSAVGNICYTPSKLIEYTDFATS	DPB1-0401_DPA1-0103;DRB1_1503;DRB1_1602;DRB1_1502;DRB1_1601;DRB1_0701;DRB1_1501	0.833457921	0.843269121	0.499698361
orf1ab polyprotein	2888	2912	VFSAVGNICYTPSKLIEYTDFATSA	DPB1-0401_DPA1-0103;DRB1_1503;DRB1_1602;DRB1_1502;DRB1_1601;DRB1_0701;DRB1_1501	0.833457921	0.843269121	0.499698361
orf1a polyprotein	2888	2912	VFSAVGNICYTPSKLIEYTDFATSA	DPB1-0401_DPA1-0103;DRB1_1503;DRB1_1602;DRB1_1502;DRB1_1601;DRB1_0701;DRB1_1501	0.833457921	0.843269121	0.499698361
orf1ab polyprotein	1793	1817	ATKYLVQQESPFVMMSAPPAQYELK	DRB1_1602;DRB1_1502;DRB1_0401;DRB3_0202;DRB1_0407;DRB1_1101;DRB5_0102;DRB1_0404;DRB1_1303;DRB1_1601;DRB5_0101;DRB1_0405;DRB1_0804;DRB1_0102;DRB1_0101;DRB1_1001;DRB1_0802;DRB1_0801	0.82836387	0.827714496	0.51833624
orf1a polyprotein	1796	1820	YLVQQESPFVMMSAPPAQYELKHGT	DRB1_1602;DRB1_1502;DRB1_0401;DRB3_0202;DRB1_0407;DRB1_1101;DRB5_0102;DRB1_0404;DRB1_1303;DRB1_1601;DRB5_0101;DRB1_0405;DRB1_0804;DRB1_0102;DRB1_0101;DRB1_1001;DRB1_0802;DRB1_0801	0.82836387	0.827714496	0.51833624
orf1a polyprotein	1797	1821	LVQQESPFVMMSAPPAQYELKHGTF	DRB1_1602;DRB1_1502;DRB1_0401;DRB3_0202;DRB1_0407;DRB1_1101;DRB5_0102;DRB1_0404;DRB1_1303;DRB1_1601;DRB5_0101;DRB1_0405;DRB1_0804;DRB1_0102;DRB1_0101;DRB1_1001;DRB1_0802;DRB1_0801	0.82836387	0.827714496	0.51833624
orf1a polyprotein	1795	1819	KYLVQQESPFVMMSAPPAQYELKHG	DRB1_1602;DRB1_1502;DRB1_0401;DRB3_0202;DRB1_0407;DRB1_1101;DRB5_0102;DRB1_0404;DRB1_1303;DRB1_1601;DRB5_0101;DRB1_0405;DRB1_0804;DRB1_0102;DRB1_0101;DRB1_1001;DRB1_0802;DRB1_0801	0.82836387	0.827714496	0.51833624
orf1a polyprotein	1794	1818	TKYLVQQESPFVMMSAPPAQYELKH	DRB1_1602;DRB1_1502;DRB1_0401;DRB3_0202;DRB1_0407;DRB1_1101;DRB5_0102;DRB1_0404;DRB1_1303;DRB1_1601;DRB5_0101;DRB1_0405;DRB1_0804;DRB1_0102;DRB1_0101;DRB1_1001;DRB1_0802;DRB1_0801	0.82836387	0.827714496	0.51833624
orf1ab polyprotein	1792	1816	QATKYLVQQESPFVMMSAPPAQYEL	DRB1_1602;DRB1_1502;DRB1_0401;DRB3_0202;DRB1_0407;DRB1_1101;DRB5_0102;DRB1_0404;DRB1_1303;DRB1_1601;DRB5_0101;DRB1_0405;DRB1_0804;DRB1_0102;DRB1_0101;DRB1_1001;DRB1_0802;DRB1_0801	0.82836387	0.827714496	0.51833624
orf1ab polyprotein	1797	1821	LVQQESPFVMMSAPPAQYELKHGTF	DRB1_1602;DRB1_1502;DRB1_0401;DRB3_0202;DRB1_0407;DRB1_1101;DRB5_0102;DRB1_0404;DRB1_1303;DRB1_1601;DRB5_0101;DRB1_0405;DRB1_0804;DRB1_0102;DRB1_0101;DRB1_1001;DRB1_0802;DRB1_0801	0.82836387	0.827714496	0.51833624
orf1a polyprotein	1793	1817	ATKYLVQQESPFVMMSAPPAQYELK	DRB1_1602;DRB1_1502;DRB1_0401;DRB3_0202;DRB1_0407;DRB1_1101;DRB5_0102;DRB1_0404;DRB1_1303;DRB1_1601;DRB5_0101;DRB1_0405;DRB1_0804;DRB1_0102;DRB1_0101;DRB1_1001;DRB1_0802;DRB1_0801	0.82836387	0.827714496	0.51833624
orf1a polyprotein	1792	1816	QATKYLVQQESPFVMMSAPPAQYEL	DRB1_1602;DRB1_1502;DRB1_0401;DRB3_0202;DRB1_0407;DRB1_1101;DRB5_0102;DRB1_0404;DRB1_1303;DRB1_1601;DRB5_0101;DRB1_0405;DRB1_0804;DRB1_0102;DRB1_0101;DRB1_1001;DRB1_0802;DRB1_0801	0.82836387	0.827714496	0.51833624
orf1ab polyprotein	1796	1820	YLVQQESPFVMMSAPPAQYELKHGT	DRB1_1602;DRB1_1502;DRB1_0401;DRB3_0202;DRB1_0407;DRB1_1101;DRB5_0102;DRB1_0404;DRB1_1303;DRB1_1601;DRB5_0101;DRB1_0405;DRB1_0804;DRB1_0102;DRB1_0101;DRB1_1001;DRB1_0802;DRB1_0801	0.82836387	0.827714496	0.51833624
orf1ab polyprotein	1795	1819	KYLVQQESPFVMMSAPPAQYELKHG	DRB1_1602;DRB1_1502;DRB1_0401;DRB3_0202;DRB1_0407;DRB1_1101;DRB5_0102;DRB1_0404;DRB1_1303;DRB1_1601;DRB5_0101;DRB1_0405;DRB1_0804;DRB1_0102;DRB1_0101;DRB1_1001;DRB1_0802;DRB1_0801	0.82836387	0.827714496	0.51833624
orf1ab polyprotein	1794	1818	TKYLVQQESPFVMMSAPPAQYELKH	DRB1_1602;DRB1_1502;DRB1_0401;DRB3_0202;DRB1_0407;DRB1_1101;DRB5_0102;DRB1_0404;DRB1_1303;DRB1_1601;DRB5_0101;DRB1_0405;DRB1_0804;DRB1_0102;DRB1_0101;DRB1_1001;DRB1_0802;DRB1_0801	0.82836387	0.827714496	0.51833624
surface glycoprotein	79	103	FDNPVLPFNDGVYFASTEKSNIIRG	DQB1-0201_DQA1-0501;DQB1-0602_DQA1-0102;DQB1-0302_DQA1-0301;DRB1_0403;DRB1_0404;DRB1_1401;DQB1-0301_DQA1-0505;DQB1-0202_DQA1-0201	0.863413856	0.863735716	0.401078326
orf1ab polyprotein	1546	1570	LDGEVITFDNLKTLLSLREVRTIKV	DPB1-1001_DPA1-0201;DRB1_1503;DRB1_0410;DQB1-0303_DQA1-0201;DRB1_0301;DRB1_0404;DRB1_0401;DRB1_0407;DRB1_1101;DRB1_0411;DPB1-1101_DPA1-0201;DRB1_0405;DRB1_0402;DRB1_1501;DRB3_0101	0.814985724	0.844454651	0.461023777
orf1a polyprotein	1546	1570	LDGEVITFDNLKTLLSLREVRTIKV	DPB1-1001_DPA1-0201;DRB1_1503;DRB1_0410;DQB1-0303_DQA1-0201;DRB1_0301;DRB1_0404;DRB1_0401;DRB1_0407;DRB1_1101;DRB1_0411;DPB1-1101_DPA1-0201;DRB1_0405;DRB1_0402;DRB1_1501;DRB3_0101	0.814985724	0.844454651	0.461023777
ORF7a protein	48	72	PLADNKFALTCFSTQFAFACPDGVK	DPB1-0401_DPA1-0103;DRB1_0404;DRB1_0901;DPB1-0402_DPA1-0103;DRB1_0402;DQB1-0202_DQA1-0201	0.859074024	0.856901438	0.380357188
orf1ab polyprotein	605	629	VVQLTSQWLTNIFGTVYEKLKPVLD	DPB1-0401_DPA1-0103;DQB1-0201_DQA1-0501;DQB1-0201_DQA1-0201;DRB1_0405;DPB1-0402_DPA1-0103	0.848267829	0.84604567	0.458122
orf1a polyprotein	605	629	VVQLTSQWLTNIFGTVYEKLKPVLD	DPB1-0401_DPA1-0103;DQB1-0201_DQA1-0501;DQB1-0201_DQA1-0201;DRB1_0405;DPB1-0402_DPA1-0103	0.848267829	0.84604567	0.458122
surface glycoprotein	1015	1039	AAEIRASANLAATKMSECVLGQSKR	DPB1-0101_DPA1-0202;DPB1-0401_DPA1-0103;DRB1_0403;DRB1_0407;DRB1_0406;DPB1-0402_DPA1-0103;DRB1_1501	0.852870702	0.854832885	0.409673406
surface glycoprotein	1016	1040	AEIRASANLAATKMSECVLGQSKRV	DPB1-0101_DPA1-0202;DPB1-0401_DPA1-0103;DRB1_0403;DRB1_0407;DRB1_0406;DPB1-0402_DPA1-0103;DRB1_1501	0.852870702	0.854832885	0.409673406
orf1a polyprotein	2861	2885	EVGFVVPGLPGTILRTTNGDFLHFL	DQB1-0201_DQA1-0501;DRB1_0403;DRB1_1401;DRB1_0701;DRB1_1404;DRB3_0301;DPB1-0201_DPA1-0103;DQB1-0301_DQA1-0505;DQB1-0202_DQA1-0201	0.797619239	0.803377902	0.597290839
orf1ab polyprotein	2861	2885	EVGFVVPGLPGTILRTTNGDFLHFL	DQB1-0201_DQA1-0501;DRB1_0403;DRB1_1401;DRB1_0701;DRB1_1404;DRB3_0301;DPB1-0201_DPA1-0103;DQB1-0301_DQA1-0505;DQB1-0202_DQA1-0201	0.797619239	0.803377902	0.597290839
orf1ab polyprotein	1330	1354	PGQGLNGYTVEEAKTVLKKCKSAFY	DQB1-0201_DQA1-0501;DQB1-0401_DQA1-0301;DQB1-0502_DQA1-0102;DRB5_0102;DRB1_1202;DQB1-0501_DQA1-0101;DQB1-0402_DQA1-0401;DRB5_0101;DRB1_1404;DRB1_0101;DRB3_0101	0.815600636	0.821719089	0.52605279
orf1a polyprotein	1330	1354	PGQGLNGYTVEEAKTVLKKCKSAFY	DQB1-0201_DQA1-0501;DQB1-0401_DQA1-0301;DQB1-0502_DQA1-0102;DRB5_0102;DRB1_1202;DQB1-0501_DQA1-0101;DQB1-0402_DQA1-0401;DRB5_0101;DRB1_1404;DRB1_0101;DRB3_0101	0.815600636	0.821719089	0.52605279
orf1ab polyprotein	5124	5148	YRNRDVDTDFVNEFYAYLRKHFSMM	DPB1-0401_DPA1-0103;DQB1-0201_DQA1-0201;DRB5_0202;DRB1_1302;DPB1-0402_DPA1-0103;DQB1-0202_DQA1-0201	0.858662891	0.857858312	0.347169026
orf1ab polyprotein	5125	5149	RNRDVDTDFVNEFYAYLRKHFSMMI	DPB1-0401_DPA1-0103;DQB1-0201_DQA1-0201;DRB5_0202;DRB1_1302;DPB1-0402_DPA1-0103;DQB1-0202_DQA1-0201	0.858662891	0.857858312	0.347169026
orf1ab polyprotein	1772	1796	GTLSYEQFKKGVQIPCTCGKQATKY	DPB1-0401_DPA1-0103;DPB1-0202_DPA1-0103;DRB1_1101;DPB1-0201_DPA1-0103;DRB1_0801	0.831676512	0.833633729	0.475432344
orf1a polyprotein	1772	1796	GTLSYEQFKKGVQIPCTCGKQATKY	DPB1-0401_DPA1-0103;DPB1-0202_DPA1-0103;DRB1_1101;DPB1-0201_DPA1-0103;DRB1_0801	0.831676512	0.833633729	0.475432344
orf1a polyprotein	1543	1567	TFHLDGEVITFDNLKTLLSLREVRT	DRB1_1503;DRB1_0410;DQB1-0303_DQA1-0201;DRB1_0301;DRB1_0404;DRB1_0401;DRB1_0407;DRB1_1101;DRB1_0411;DPB1-1101_DPA1-0201;DRB1_0405;DRB1_0402;DRB1_1501;DRB3_0101	0.808716437	0.839183931	0.461023777
orf1ab polyprotein	1544	1568	FHLDGEVITFDNLKTLLSLREVRTI	DRB1_1503;DRB1_0410;DQB1-0303_DQA1-0201;DRB1_0301;DRB1_0404;DRB1_0401;DRB1_0407;DRB1_1101;DRB1_0411;DPB1-1101_DPA1-0201;DRB1_0405;DRB1_0402;DRB1_1501;DRB3_0101	0.808716437	0.839183931	0.461023777
orf1ab polyprotein	1543	1567	TFHLDGEVITFDNLKTLLSLREVRT	DRB1_1503;DRB1_0410;DQB1-0303_DQA1-0201;DRB1_0301;DRB1_0404;DRB1_0401;DRB1_0407;DRB1_1101;DRB1_0411;DPB1-1101_DPA1-0201;DRB1_0405;DRB1_0402;DRB1_1501;DRB3_0101	0.808716437	0.839183931	0.461023777
orf1ab polyprotein	1545	1569	HLDGEVITFDNLKTLLSLREVRTIK	DRB1_1503;DRB1_0410;DQB1-0303_DQA1-0201;DRB1_0301;DRB1_0404;DRB1_0401;DRB1_0407;DRB1_1101;DRB1_0411;DPB1-1101_DPA1-0201;DRB1_0405;DRB1_0402;DRB1_1501;DRB3_0101	0.808716437	0.839183931	0.461023777
orf1a polyprotein	1544	1568	FHLDGEVITFDNLKTLLSLREVRTI	DRB1_1503;DRB1_0410;DQB1-0303_DQA1-0201;DRB1_0301;DRB1_0404;DRB1_0401;DRB1_0407;DRB1_1101;DRB1_0411;DPB1-1101_DPA1-0201;DRB1_0405;DRB1_0402;DRB1_1501;DRB3_0101	0.808716437	0.839183931	0.461023777
orf1a polyprotein	1545	1569	HLDGEVITFDNLKTLLSLREVRTIK	DRB1_1503;DRB1_0410;DQB1-0303_DQA1-0201;DRB1_0301;DRB1_0404;DRB1_0401;DRB1_0407;DRB1_1101;DRB1_0411;DPB1-1101_DPA1-0201;DRB1_0405;DRB1_0402;DRB1_1501;DRB3_0101	0.808716437	0.839183931	0.461023777
orf1ab polyprotein	4761	4785	KELLVYAADPAMHAASGNLLLDKRT	DRB1_0901;DRB1_1401;DRB1_0102;DRB1_0701;DRB1_1501;DRB1_0101;DQB1-0301_DQA1-0505;DRB3_0101	0.787970535	0.825298524	0.530446142
orf1ab polyprotein	5545	5569	VGDYFVLTSHTVMPLSAPTLVPQEH	DQB1-0201_DQA1-0501;DRB1_1602;DRB1_1301;DQB1-0303_DQA1-0201;DRB1_1601;DRB1_1101;DRB1_1202;DRB1_1201;DRB1_1402;DRB1_0102;DRB4_0103;DRB1_0101;DRB1_1001;DRB1_0802	0.811341117	0.80515694	0.532872587
orf1ab polyprotein	5127	5151	RDVDTDFVNEFYAYLRKHFSMMILS	DPB1-0401_DPA1-0103;DRB5_0202;DRB1_1101;DRB1_1303;DRB1_1302;DRB1_1402;DPB1-0402_DPA1-0103;DRB1_0802;DRB1_0801	0.856645308	0.85005337	0.367611983
orf1ab polyprotein	1948	1972	KKPASRELKVTFFPDLNGDVVAIDY	DPB1-0401_DPA1-0103;DPB1-0101_DPA1-0201;DQB1-0502_DQA1-0102;DQB1-0501_DQA1-0101;DRB1_0402;DRB3_0101	0.859694932	0.859673558	0.280118782
orf1a polyprotein	1947	1971	YKKPASRELKVTFFPDLNGDVVAID	DPB1-0401_DPA1-0103;DPB1-0101_DPA1-0201;DQB1-0502_DQA1-0102;DQB1-0501_DQA1-0101;DRB1_0402;DRB3_0101	0.859694932	0.859673558	0.280118782
orf1ab polyprotein	1947	1971	YKKPASRELKVTFFPDLNGDVVAID	DPB1-0401_DPA1-0103;DPB1-0101_DPA1-0201;DQB1-0502_DQA1-0102;DQB1-0501_DQA1-0101;DRB1_0402;DRB3_0101	0.859694932	0.859673558	0.280118782
orf1a polyprotein	1948	1972	KKPASRELKVTFFPDLNGDVVAIDY	DPB1-0401_DPA1-0103;DPB1-0101_DPA1-0201;DQB1-0502_DQA1-0102;DQB1-0501_DQA1-0101;DRB1_0402;DRB3_0101	0.859694932	0.859673558	0.280118782
orf1ab polyprotein	1949	1973	KPASRELKVTFFPDLNGDVVAIDYK	DPB1-0401_DPA1-0103;DPB1-0101_DPA1-0201;DQB1-0502_DQA1-0102;DQB1-0501_DQA1-0101;DRB1_0402;DRB3_0101	0.859694932	0.859673558	0.280118782
orf1a polyprotein	1949	1973	KPASRELKVTFFPDLNGDVVAIDYK	DPB1-0401_DPA1-0103;DPB1-0101_DPA1-0201;DQB1-0502_DQA1-0102;DQB1-0501_DQA1-0101;DRB1_0402;DRB3_0101	0.859694932	0.859673558	0.280118782
ORF7a protein	45	69	PFHPLADNKFALTCFSTQFAFACPD	DPB1-0401_DPA1-0103;DQB1-0602_DQA1-0102;DRB1_0404;DPB1-0402_DPA1-0103;DRB1_0402	0.861727626	0.862449444	0.284137734
orf1ab polyprotein	6745	6769	SVIDLLLDDFVEIIKSQDLSVVSKV	DRB1_1602;DQB1-0602_DQA1-0102;DRB1_1601;DRB1_1101;DRB1_1303;DRB1_0406;DRB1_1402;DRB1_0803;DRB1_0701;DPB1-0402_DPA1-0103;DRB1_1501;DRB1_0802;DRB1_0801	0.765897807	0.782206072	0.631248826
orf1ab polyprotein	6746	6770	VIDLLLDDFVEIIKSQDLSVVSKVV	DRB1_1602;DQB1-0602_DQA1-0102;DRB1_1601;DRB1_1101;DRB1_1303;DRB1_0406;DRB1_1402;DRB1_0803;DRB1_0701;DPB1-0402_DPA1-0103;DRB1_1501;DRB1_0802;DRB1_0801	0.765897807	0.782206072	0.631248826
orf1ab polyprotein	6747	6771	IDLLLDDFVEIIKSQDLSVVSKVVK	DRB1_1602;DQB1-0602_DQA1-0102;DRB1_1601;DRB1_1101;DRB1_1303;DRB1_0406;DRB1_1402;DRB1_0803;DRB1_0701;DPB1-0402_DPA1-0103;DRB1_1501;DRB1_0802;DRB1_0801	0.765897807	0.782206072	0.631248826
orf1ab polyprotein	3292	3316	GLWLDDVVYCPRHVICTSEDMLNPN	DPB1-1001_DPA1-0201;DQB1-0201_DQA1-0501;DQB1-0401_DQA1-0301;DRB1_1102;DRB1_1301;DRB1_1503;DPB1-0101_DPA1-0103;DQB1-0201_DQA1-0201;DQB1-0302_DQA1-0301;DPB1-1701_DPA1-0201;DRB1_1405;DRB1_1302;DRB1_0406;DPB1-1101_DPA1-0201;DRB1_1401;DPB1-0901_DPA1-0201;DRB1_1404;DRB1_1406;DQB1-0603_DQA1-0103;DQB1-0202_DQA1-0201	0.775730777	0.761390556	0.658319946
orf1a polyprotein	3292	3316	GLWLDDVVYCPRHVICTSEDMLNPN	DPB1-1001_DPA1-0201;DQB1-0201_DQA1-0501;DQB1-0401_DQA1-0301;DRB1_1102;DRB1_1301;DRB1_1503;DPB1-0101_DPA1-0103;DQB1-0201_DQA1-0201;DQB1-0302_DQA1-0301;DPB1-1701_DPA1-0201;DRB1_1405;DRB1_1302;DRB1_0406;DPB1-1101_DPA1-0201;DRB1_1401;DPB1-0901_DPA1-0201;DRB1_1404;DRB1_1406;DQB1-0603_DQA1-0103;DQB1-0202_DQA1-0201	0.775730777	0.761390556	0.658319946
orf1ab polyprotein	1542	1566	TTFHLDGEVITFDNLKTLLSLREVR	DRB1_1503;DRB1_0410;DQB1-0303_DQA1-0201;DRB1_0301;DRB1_0404;DRB1_0401;DRB1_0407;DRB1_1101;DRB1_0411;DRB1_0302;DRB1_0405;DRB1_0402;DRB1_1501;DRB3_0101	0.806852336	0.831689548	0.461023777
orf1a polyprotein	1542	1566	TTFHLDGEVITFDNLKTLLSLREVR	DRB1_1503;DRB1_0410;DQB1-0303_DQA1-0201;DRB1_0301;DRB1_0404;DRB1_0401;DRB1_0407;DRB1_1101;DRB1_0411;DRB1_0302;DRB1_0405;DRB1_0402;DRB1_1501;DRB3_0101	0.806852336	0.831689548	0.461023777
orf1ab polyprotein	475	499	IILASFSASTSAFVETVKGLDYKAF	DRB1_1602;DQB1-0602_DQA1-0102;DQB1-0302_DQA1-0301;DRB1_1601;DRB1_0901;DRB1_1101;DQB1-0601_DQA1-0103;DRB1_1201;DRB1_0701;DQB1-0202_DQA1-0201;DRB1_0801	0.772046397	0.773690386	0.645020322
orf1a polyprotein	475	499	IILASFSASTSAFVETVKGLDYKAF	DRB1_1602;DQB1-0602_DQA1-0102;DQB1-0302_DQA1-0301;DRB1_1601;DRB1_0901;DRB1_1101;DQB1-0601_DQA1-0103;DRB1_1201;DRB1_0701;DQB1-0202_DQA1-0201;DRB1_0801	0.772046397	0.773690386	0.645020322
membrane glycoprotein	159	183	CDIKDLPKEITVATSRTLSYYKLGA	DRB1_1503;DRB1_1602;DRB1_1301;DQB1-0303_DQA1-0201;DRB1_0101;DRB1_0403;DRB1_0404;DRB1_1601;DRB5_0102;DRB1_0901;DRB1_0406;DRB1_0102;DRB1_0402;DRB1_1501;DRB1_1406;DQB1-0301_DQA1-0505;DQB1-0202_DQA1-0201	0.795679272	0.807917849	0.542388339
membrane glycoprotein	160	184	DIKDLPKEITVATSRTLSYYKLGAS	DRB1_1503;DRB1_1602;DRB1_1301;DQB1-0303_DQA1-0201;DRB1_0101;DRB1_0403;DRB1_0404;DRB1_1601;DRB5_0102;DRB1_0901;DRB1_0406;DRB1_0102;DRB1_0402;DRB1_1501;DRB1_1406;DQB1-0301_DQA1-0505;DQB1-0202_DQA1-0201	0.795679272	0.807917849	0.542388339
membrane glycoprotein	161	185	IKDLPKEITVATSRTLSYYKLGASQ	DRB1_1503;DRB1_1602;DRB1_1301;DQB1-0303_DQA1-0201;DRB1_0101;DRB1_0403;DRB1_0404;DRB1_1601;DRB5_0102;DRB1_0901;DRB1_0406;DRB1_0102;DRB1_0402;DRB1_1501;DRB1_1406;DQB1-0301_DQA1-0505;DQB1-0202_DQA1-0201	0.795679272	0.807917849	0.542388339
orf1a polyprotein	603	627	GGVVQLTSQWLTNIFGTVYEKLKPV	DPB1-0401_DPA1-0103;DQB1-0201_DQA1-0501;DRB1_1601;DQB1-0201_DQA1-0201;DPB1-0402_DPA1-0103	0.847418281	0.84817991	0.3897075
orf1ab polyprotein	603	627	GGVVQLTSQWLTNIFGTVYEKLKPV	DPB1-0401_DPA1-0103;DQB1-0201_DQA1-0501;DRB1_1601;DQB1-0201_DQA1-0201;DPB1-0402_DPA1-0103	0.847418281	0.84817991	0.3897075
surface glycoprotein	332	356	ITNLCPFGEVFNATRFASVYAWNRK	DPB1-0401_DPA1-0103;DPB1-0101_DPA1-0103;DPB1-0301_DPA1-0103;DPB1-0402_DPA1-0103;DRB1_0804;DRB1_1104	0.883649825	0.883162131	0.219919782
ORF7a protein	44	68	SPFHPLADNKFALTCFSTQFAFACP	DPB1-0401_DPA1-0103;DRB1_0404;DQB1-0602_DQA1-0102;DPB1-0402_DPA1-0103	0.858880877	0.85963207	0.278791106
orf1ab polyprotein	604	628	GVVQLTSQWLTNIFGTVYEKLKPVL	DPB1-0401_DPA1-0103;DQB1-0201_DQA1-0201;DQB1-0201_DQA1-0501;DPB1-0402_DPA1-0103	0.84490628	0.84490628	0.389365592
orf1a polyprotein	604	628	GVVQLTSQWLTNIFGTVYEKLKPVL	DPB1-0401_DPA1-0103;DQB1-0201_DQA1-0201;DQB1-0201_DQA1-0501;DPB1-0402_DPA1-0103	0.84490628	0.84490628	0.389365592
orf1ab polyprotein	6744	6768	CSVIDLLLDDFVEIIKSQDLSVVSK	DRB1_1602;DQB1-0602_DQA1-0102;DRB1_1601;DRB1_1101;DRB1_1303;DRB1_1402;DRB1_0803;DRB1_0701;DPB1-0402_DPA1-0103;DRB1_1501;DRB1_0802;DRB1_0801	0.764429418	0.782028717	0.608433146
orf1ab polyprotein	2602	2626	FNVPMEKLKTLVATAEAELAKNVSL	DQB1-0201_DQA1-0501;DRB1_1503;DQB1-0303_DQA1-0201;DQB1-0302_DQA1-0301;DQB1-0201_DQA1-0201;DRB1_0404;DQB1-0601_DQA1-0103;DQB1-0301_DQA1-0505;DQB1-0301_DQA1-0501;DQB1-0202_DQA1-0201	0.779574769	0.772549555	0.603249069
orf1a polyprotein	2602	2626	FNVPMEKLKTLVATAEAELAKNVSL	DQB1-0201_DQA1-0501;DRB1_1503;DQB1-0303_DQA1-0201;DQB1-0302_DQA1-0301;DQB1-0201_DQA1-0201;DRB1_0404;DQB1-0601_DQA1-0103;DQB1-0301_DQA1-0505;DQB1-0301_DQA1-0501;DQB1-0202_DQA1-0201	0.779574769	0.772549555	0.603249069
orf1ab polyprotein	2601	2625	TFNVPMEKLKTLVATAEAELAKNVS	DQB1-0201_DQA1-0501;DRB1_1503;DQB1-0303_DQA1-0201;DQB1-0302_DQA1-0301;DQB1-0201_DQA1-0201;DRB1_0404;DQB1-0601_DQA1-0103;DQB1-0301_DQA1-0505;DQB1-0301_DQA1-0501;DQB1-0202_DQA1-0201	0.779574769	0.772549555	0.603249069
orf1a polyprotein	2601	2625	TFNVPMEKLKTLVATAEAELAKNVS	DQB1-0201_DQA1-0501;DRB1_1503;DQB1-0303_DQA1-0201;DQB1-0302_DQA1-0301;DQB1-0201_DQA1-0201;DRB1_0404;DQB1-0601_DQA1-0103;DQB1-0301_DQA1-0505;DQB1-0301_DQA1-0501;DQB1-0202_DQA1-0201	0.779574769	0.772549555	0.603249069
orf1a polyprotein	655	679	CACEIVGGQIVTCAKEIKESVQTFF	DPB1-1001_DPA1-0201;DRB1_1102;DRB1_1301;DRB1_0301;DQB1-0302_DQA1-0301;DQB1-0301_DQA1-0303;DPB1-1701_DPA1-0201;DRB1_0406;DRB1_1405;DRB1_0302;DPB1-1101_DPA1-0201;DRB1_0701;DPB1-0901_DPA1-0201;DQB1-0301_DQA1-0505;DRB1_1406	0.780948677	0.793693514	0.562092033
orf1ab polyprotein	652	676	ISTCACEIVGGQIVTCAKEIKESVQ	DPB1-1001_DPA1-0201;DRB1_1102;DRB1_1301;DRB1_0301;DQB1-0302_DQA1-0301;DQB1-0301_DQA1-0303;DPB1-1701_DPA1-0201;DRB1_0406;DRB1_1405;DRB1_0302;DPB1-1101_DPA1-0201;DRB1_0701;DPB1-0901_DPA1-0201;DQB1-0301_DQA1-0505;DRB1_1406	0.780948677	0.793693514	0.562092033
orf1a polyprotein	654	678	TCACEIVGGQIVTCAKEIKESVQTF	DPB1-1001_DPA1-0201;DRB1_1102;DRB1_1301;DRB1_0301;DQB1-0302_DQA1-0301;DQB1-0301_DQA1-0303;DPB1-1701_DPA1-0201;DRB1_0406;DRB1_1405;DRB1_0302;DPB1-1101_DPA1-0201;DRB1_0701;DPB1-0901_DPA1-0201;DQB1-0301_DQA1-0505;DRB1_1406	0.780948677	0.793693514	0.562092033
orf1a polyprotein	656	680	ACEIVGGQIVTCAKEIKESVQTFFK	DPB1-1001_DPA1-0201;DRB1_1102;DRB1_1301;DRB1_0301;DQB1-0302_DQA1-0301;DQB1-0301_DQA1-0303;DPB1-1701_DPA1-0201;DRB1_0406;DRB1_1405;DRB1_0302;DPB1-1101_DPA1-0201;DRB1_0701;DPB1-0901_DPA1-0201;DQB1-0301_DQA1-0505;DRB1_1406	0.780948677	0.793693514	0.562092033
orf1a polyprotein	652	676	ISTCACEIVGGQIVTCAKEIKESVQ	DPB1-1001_DPA1-0201;DRB1_1102;DRB1_1301;DRB1_0301;DQB1-0302_DQA1-0301;DQB1-0301_DQA1-0303;DPB1-1701_DPA1-0201;DRB1_0406;DRB1_1405;DRB1_0302;DPB1-1101_DPA1-0201;DRB1_0701;DPB1-0901_DPA1-0201;DQB1-0301_DQA1-0505;DRB1_1406	0.780948677	0.793693514	0.562092033
orf1a polyprotein	653	677	STCACEIVGGQIVTCAKEIKESVQT	DPB1-1001_DPA1-0201;DRB1_1102;DRB1_1301;DRB1_0301;DQB1-0302_DQA1-0301;DQB1-0301_DQA1-0303;DPB1-1701_DPA1-0201;DRB1_0406;DRB1_1405;DRB1_0302;DPB1-1101_DPA1-0201;DRB1_0701;DPB1-0901_DPA1-0201;DQB1-0301_DQA1-0505;DRB1_1406	0.780948677	0.793693514	0.562092033
orf1ab polyprotein	654	678	TCACEIVGGQIVTCAKEIKESVQTF	DPB1-1001_DPA1-0201;DRB1_1102;DRB1_1301;DRB1_0301;DQB1-0302_DQA1-0301;DQB1-0301_DQA1-0303;DPB1-1701_DPA1-0201;DRB1_0406;DRB1_1405;DRB1_0302;DPB1-1101_DPA1-0201;DRB1_0701;DPB1-0901_DPA1-0201;DQB1-0301_DQA1-0505;DRB1_1406	0.780948677	0.793693514	0.562092033
orf1ab polyprotein	656	680	ACEIVGGQIVTCAKEIKESVQTFFK	DPB1-1001_DPA1-0201;DRB1_1102;DRB1_1301;DRB1_0301;DQB1-0302_DQA1-0301;DQB1-0301_DQA1-0303;DPB1-1701_DPA1-0201;DRB1_0406;DRB1_1405;DRB1_0302;DPB1-1101_DPA1-0201;DRB1_0701;DPB1-0901_DPA1-0201;DQB1-0301_DQA1-0505;DRB1_1406	0.780948677	0.793693514	0.562092033
orf1ab polyprotein	655	679	CACEIVGGQIVTCAKEIKESVQTFF	DPB1-1001_DPA1-0201;DRB1_1102;DRB1_1301;DRB1_0301;DQB1-0302_DQA1-0301;DQB1-0301_DQA1-0303;DPB1-1701_DPA1-0201;DRB1_0406;DRB1_1405;DRB1_0302;DPB1-1101_DPA1-0201;DRB1_0701;DPB1-0901_DPA1-0201;DQB1-0301_DQA1-0505;DRB1_1406	0.780948677	0.793693514	0.562092033
orf1ab polyprotein	653	677	STCACEIVGGQIVTCAKEIKESVQT	DPB1-1001_DPA1-0201;DRB1_1102;DRB1_1301;DRB1_0301;DQB1-0302_DQA1-0301;DQB1-0301_DQA1-0303;DPB1-1701_DPA1-0201;DRB1_0406;DRB1_1405;DRB1_0302;DPB1-1101_DPA1-0201;DRB1_0701;DPB1-0901_DPA1-0201;DQB1-0301_DQA1-0505;DRB1_1406	0.780948677	0.793693514	0.562092033
orf1ab polyprotein	4266	4290	VLSFCAFAVDAAKAYKDYLASGGQP	DPB1-0101_DPA1-0201;DQB1-0502_DQA1-0102;DQB1-0302_DQA1-0301;DRB1_0411;DQB1-0501_DQA1-0101;DPB1-0501_DPA1-0201;DRB1_0402;DRB1_1501;DRB3_0101;DQB1-0301_DQA1-0505	0.789891333	0.803626812	0.494192713
orf1ab polyprotein	4267	4291	LSFCAFAVDAAKAYKDYLASGGQPI	DPB1-0101_DPA1-0201;DQB1-0502_DQA1-0102;DQB1-0302_DQA1-0301;DRB1_0411;DQB1-0501_DQA1-0101;DPB1-0501_DPA1-0201;DRB1_0402;DRB1_1501;DRB3_0101;DQB1-0301_DQA1-0505	0.789891333	0.803626812	0.494192713
orf1a polyprotein	4266	4290	VLSFCAFAVDAAKAYKDYLASGGQP	DPB1-0101_DPA1-0201;DQB1-0502_DQA1-0102;DQB1-0302_DQA1-0301;DRB1_0411;DQB1-0501_DQA1-0101;DPB1-0501_DPA1-0201;DRB1_0402;DRB1_1501;DRB3_0101;DQB1-0301_DQA1-0505	0.789891333	0.803626812	0.494192713
orf1a polyprotein	4267	4291	LSFCAFAVDAAKAYKDYLASGGQPI	DPB1-0101_DPA1-0201;DQB1-0502_DQA1-0102;DQB1-0302_DQA1-0301;DRB1_0411;DQB1-0501_DQA1-0101;DPB1-0501_DPA1-0201;DRB1_0402;DRB1_1501;DRB3_0101;DQB1-0301_DQA1-0505	0.789891333	0.803626812	0.494192713
orf1ab polyprotein	5642	5666	CEKALKYLPIDKCSRIIPARARVEC	DQB1-0602_DQA1-0102;DQB1-0303_DQA1-0201;DQB1-0302_DQA1-0301;DRB1_0404;DRB1_0901;DRB1_1302;DQB1-0303_DQA1-0301;DRB1_1402;DRB4_0103	0.77901642	0.772029744	0.593224324
orf1ab polyprotein	5641	5665	LCEKALKYLPIDKCSRIIPARARVE	DQB1-0602_DQA1-0102;DQB1-0303_DQA1-0201;DQB1-0302_DQA1-0301;DRB1_0404;DRB1_0901;DRB1_1302;DQB1-0303_DQA1-0301;DRB1_1402;DRB4_0103	0.77901642	0.772029744	0.593224324
orf1ab polyprotein	3294	3318	WLDDVVYCPRHVICTSEDMLNPNYE	DPB1-1001_DPA1-0201;DQB1-0201_DQA1-0501;DQB1-0401_DQA1-0301;DRB1_1102;DRB1_1301;DRB1_1503;DPB1-0101_DPA1-0103;DQB1-0201_DQA1-0201;DQB1-0302_DQA1-0301;DRB1_0403;DPB1-1701_DPA1-0201;DRB1_1405;DRB1_1302;DRB1_0406;DPB1-1101_DPA1-0201;DRB1_1401;DRB1_1404;DRB1_1406;DQB1-0603_DQA1-0103;DQB1-0202_DQA1-0201	0.777435743	0.760919381	0.602785782
orf1a polyprotein	3295	3319	LDDVVYCPRHVICTSEDMLNPNYED	DPB1-1001_DPA1-0201;DQB1-0201_DQA1-0501;DQB1-0401_DQA1-0301;DRB1_1102;DRB1_1301;DRB1_1503;DPB1-0101_DPA1-0103;DQB1-0201_DQA1-0201;DQB1-0302_DQA1-0301;DRB1_0403;DPB1-1701_DPA1-0201;DRB1_1405;DRB1_1302;DRB1_0406;DPB1-1101_DPA1-0201;DRB1_1401;DRB1_1404;DRB1_1406;DQB1-0603_DQA1-0103;DQB1-0202_DQA1-0201	0.777435743	0.760919381	0.602785782
orf1a polyprotein	3294	3318	WLDDVVYCPRHVICTSEDMLNPNYE	DPB1-1001_DPA1-0201;DQB1-0201_DQA1-0501;DQB1-0401_DQA1-0301;DRB1_1102;DRB1_1301;DRB1_1503;DPB1-0101_DPA1-0103;DQB1-0201_DQA1-0201;DQB1-0302_DQA1-0301;DRB1_0403;DPB1-1701_DPA1-0201;DRB1_1405;DRB1_1302;DRB1_0406;DPB1-1101_DPA1-0201;DRB1_1401;DRB1_1404;DRB1_1406;DQB1-0603_DQA1-0103;DQB1-0202_DQA1-0201	0.777435743	0.760919381	0.602785782
orf1ab polyprotein	3295	3319	LDDVVYCPRHVICTSEDMLNPNYED	DPB1-1001_DPA1-0201;DQB1-0201_DQA1-0501;DQB1-0401_DQA1-0301;DRB1_1102;DRB1_1301;DRB1_1503;DPB1-0101_DPA1-0103;DQB1-0201_DQA1-0201;DQB1-0302_DQA1-0301;DRB1_0403;DPB1-1701_DPA1-0201;DRB1_1405;DRB1_1302;DRB1_0406;DPB1-1101_DPA1-0201;DRB1_1401;DRB1_1404;DRB1_1406;DQB1-0603_DQA1-0103;DQB1-0202_DQA1-0201	0.777435743	0.760919381	0.602785782
orf1a polyprotein	1328	1352	TYPGQGLNGYTVEEAKTVLKKCKSA	DQB1-0201_DQA1-0501;DQB1-0401_DQA1-0301;DQB1-0502_DQA1-0102;DRB5_0102;DQB1-0501_DQA1-0101;DQB1-0402_DQA1-0401;DRB5_0101;DRB1_0101;DRB3_0101	0.81270909	0.821593432	0.418601558
orf1a polyprotein	1329	1353	YPGQGLNGYTVEEAKTVLKKCKSAF	DQB1-0201_DQA1-0501;DQB1-0401_DQA1-0301;DQB1-0502_DQA1-0102;DRB5_0102;DQB1-0501_DQA1-0101;DQB1-0402_DQA1-0401;DRB5_0101;DRB1_0101;DRB3_0101	0.81270909	0.821593432	0.418601558
orf1ab polyprotein	1329	1353	YPGQGLNGYTVEEAKTVLKKCKSAF	DQB1-0201_DQA1-0501;DQB1-0401_DQA1-0301;DQB1-0502_DQA1-0102;DRB5_0102;DQB1-0501_DQA1-0101;DQB1-0402_DQA1-0401;DRB5_0101;DRB1_0101;DRB3_0101	0.81270909	0.821593432	0.418601558
orf1ab polyprotein	1328	1352	TYPGQGLNGYTVEEAKTVLKKCKSA	DQB1-0201_DQA1-0501;DQB1-0401_DQA1-0301;DQB1-0502_DQA1-0102;DRB5_0102;DQB1-0501_DQA1-0101;DQB1-0402_DQA1-0401;DRB5_0101;DRB1_0101;DRB3_0101	0.81270909	0.821593432	0.418601558
orf1ab polyprotein	474	498	AIILASFSASTSAFVETVKGLDYKA	DRB1_1602;DQB1-0602_DQA1-0102;DQB1-0302_DQA1-0301;DRB1_1601;DRB1_0901;DRB1_1101;DQB1-0601_DQA1-0103;DRB1_0701;DQB1-0202_DQA1-0201;DRB1_0801	0.760679432	0.764712994	0.615663039
orf1a polyprotein	473	497	IAIILASFSASTSAFVETVKGLDYK	DRB1_1602;DQB1-0602_DQA1-0102;DQB1-0302_DQA1-0301;DRB1_1601;DRB1_0901;DRB1_1101;DQB1-0601_DQA1-0103;DRB1_0701;DQB1-0202_DQA1-0201;DRB1_0801	0.760679432	0.764712994	0.615663039
orf1ab polyprotein	473	497	IAIILASFSASTSAFVETVKGLDYK	DRB1_1602;DQB1-0602_DQA1-0102;DQB1-0302_DQA1-0301;DRB1_1601;DRB1_0901;DRB1_1101;DQB1-0601_DQA1-0103;DRB1_0701;DQB1-0202_DQA1-0201;DRB1_0801	0.760679432	0.764712994	0.615663039
orf1a polyprotein	474	498	AIILASFSASTSAFVETVKGLDYKA	DRB1_1602;DQB1-0602_DQA1-0102;DQB1-0302_DQA1-0301;DRB1_1601;DRB1_0901;DRB1_1101;DQB1-0601_DQA1-0103;DRB1_0701;DQB1-0202_DQA1-0201;DRB1_0801	0.760679432	0.764712994	0.615663039
ORF7a protein	40	64	YEGNSPFHPLADNKFALTCFSTQFA	DPB1-0401_DPA1-0103;DPB1-0201_DPA1-0103;DQB1-0502_DQA1-0102	0.808060644	0.808060644	0.499904934
ORF7a protein	39	63	TYEGNSPFHPLADNKFALTCFSTQF	DPB1-0401_DPA1-0103;DPB1-0201_DPA1-0103;DQB1-0502_DQA1-0102	0.808060644	0.808060644	0.499904934
ORF7a protein	47	71	HPLADNKFALTCFSTQFAFACPDGV	DPB1-0401_DPA1-0103;DRB1_0404;DPB1-0402_DPA1-0103;DRB1_0402;DQB1-0202_DQA1-0201	0.85364521	0.85440922	0.229672499
membrane glycoprotein	158	182	RCDIKDLPKEITVATSRTLSYYKLG	DRB1_1503;DRB1_1602;DRB1_1301;DRB1_0403;DRB1_0404;DRB1_1601;DRB5_0102;DRB1_0901;DRB1_1406;DRB1_0406;DRB1_0102;DRB1_0402;DRB1_1501;DRB1_0101;DQB1-0301_DQA1-0505;DQB1-0202_DQA1-0201	0.774659918	0.78815753	0.542388339
orf1ab polyprotein	5123	5147	LYRNRDVDTDFVNEFYAYLRKHFSM	DPB1-0401_DPA1-0103;DQB1-0201_DQA1-0201;DRB5_0202;DPB1-0402_DPA1-0103;DQB1-0202_DQA1-0201	0.845718189	0.845718189	0.297207841
orf1ab polyprotein	5122	5146	CLYRNRDVDTDFVNEFYAYLRKHFS	DPB1-0401_DPA1-0103;DQB1-0201_DQA1-0201;DRB5_0202;DPB1-0402_DPA1-0103;DQB1-0202_DQA1-0201	0.845718189	0.845718189	0.297207841
orf1a polyprotein	4265	4289	TVLSFCAFAVDAAKAYKDYLASGGQ	DPB1-0101_DPA1-0201;DQB1-0502_DQA1-0102;DQB1-0302_DQA1-0301;DRB1_0411;DQB1-0501_DQA1-0101;DPB1-0501_DPA1-0201;DRB1_1501;DRB3_0101;DQB1-0301_DQA1-0505	0.785160509	0.799087783	0.490125449
orf1ab polyprotein	4265	4289	TVLSFCAFAVDAAKAYKDYLASGGQ	DPB1-0101_DPA1-0201;DQB1-0502_DQA1-0102;DQB1-0302_DQA1-0301;DRB1_0411;DQB1-0501_DQA1-0101;DPB1-0501_DPA1-0201;DRB1_1501;DRB3_0101;DQB1-0301_DQA1-0505	0.785160509	0.799087783	0.490125449
orf1ab polyprotein	1345	1369	VLKKCKSAFYILPSIISNEKQEILG	DQB1-0201_DQA1-0501;DRB1_1602;DRB1_1301;DRB1_0404;DRB1_0401;DRB1_0407;DRB1_0402;DRB1_0403;DRB1_1101;DRB1_1601;DRB1_1405;DRB1_0406;DRB1_1402;DRB1_0302;DRB1_0405;DPB1-0901_DPA1-0201;DRB1_1401;DRB1_1404;DRB1_0101;DRB1_1406	0.722892551	0.735995103	0.682428417
orf1a polyprotein	1345	1369	VLKKCKSAFYILPSIISNEKQEILG	DQB1-0201_DQA1-0501;DRB1_1602;DRB1_1301;DRB1_0404;DRB1_0401;DRB1_0407;DRB1_0402;DRB1_0403;DRB1_1101;DRB1_1601;DRB1_1405;DRB1_0406;DRB1_1402;DRB1_0302;DRB1_0405;DPB1-0901_DPA1-0201;DRB1_1401;DRB1_1404;DRB1_0101;DRB1_1406	0.722892551	0.735995103	0.682428417
orf1ab polyprotein	5914	5938	LEIPRRNVATLQAENVTGLFKDCSK	DPB1-0101_DPA1-0202;DQB1-0201_DQA1-0501;DQB1-0303_DQA1-0201;DPB1-0101_DPA1-0103;DQB1-0302_DQA1-0301;DQB1-0201_DQA1-0201;DRB1_1202;DQB1-0601_DQA1-0103;DRB1_1201;DPB1-0301_DPA1-0103;DRB1_0102;DRB1_0101;DQB1-0202_DQA1-0201	0.766975073	0.767580798	0.572619201
orf1a polyprotein	3745	3769	SGVVTTVMFLARGIVFMCVEYCPIF	DPB1-0401_DPA1-0103;DQB1-0303_DQA1-0201;DQB1-0602_DQA1-0102;DPB1-0101_DPA1-0103;DRB1_0404;DQB1-0301_DQA1-0505	0.850894565	0.851688269	0.160743398
orf1ab polyprotein	3745	3769	SGVVTTVMFLARGIVFMCVEYCPIF	DPB1-0401_DPA1-0103;DQB1-0303_DQA1-0201;DQB1-0602_DQA1-0102;DPB1-0101_DPA1-0103;DRB1_0404;DQB1-0301_DQA1-0505	0.850894565	0.851688269	0.160743398
surface glycoprotein	1182	1206	EIDRLNEVAKNLNESLIDLQELGKY	DPB1-1001_DPA1-0201;DPB1-1401_DPA1-0201;DQB1-0502_DQA1-0102;DPB1-0501_DPA1-0202;DQB1-0604_DQA1-0102;DPB1-1701_DPA1-0201;DPB1-0301_DPA1-0103;DPB1-0901_DPA1-0201;DRB4_0103;DRB3_0301	0.707331711	0.707331711	0.782347893
surface glycoprotein	358	382	ISNCVADYSVLYNSASFSTFKCYGV	DPB1-0401_DPA1-0103;DRB1_0301;DRB3_0202;DRB3_0201;DRB3_0301;DRB1_0802	0.84356338	0.846717344	0.198981551
orf1a polyprotein	2606	2630	MEKLKTLVATAEAELAKNVSLDNVL	DQB1-0201_DQA1-0501;DRB1_1503;DQB1-0303_DQA1-0201;DQB1-0302_DQA1-0301;DQB1-0201_DQA1-0201;DQB1-0601_DQA1-0103;DQB1-0301_DQA1-0505;DQB1-0301_DQA1-0501;DQB1-0202_DQA1-0201	0.763601518	0.755068101	0.595964994
orf1a polyprotein	2604	2628	VPMEKLKTLVATAEAELAKNVSLDN	DQB1-0201_DQA1-0501;DRB1_1503;DQB1-0303_DQA1-0201;DQB1-0302_DQA1-0301;DQB1-0201_DQA1-0201;DQB1-0601_DQA1-0103;DQB1-0301_DQA1-0505;DQB1-0301_DQA1-0501;DQB1-0202_DQA1-0201	0.763601518	0.755068101	0.595964994
orf1ab polyprotein	2606	2630	MEKLKTLVATAEAELAKNVSLDNVL	DQB1-0201_DQA1-0501;DRB1_1503;DQB1-0303_DQA1-0201;DQB1-0302_DQA1-0301;DQB1-0201_DQA1-0201;DQB1-0601_DQA1-0103;DQB1-0301_DQA1-0505;DQB1-0301_DQA1-0501;DQB1-0202_DQA1-0201	0.763601518	0.755068101	0.595964994
orf1a polyprotein	2605	2629	PMEKLKTLVATAEAELAKNVSLDNV	DQB1-0201_DQA1-0501;DRB1_1503;DQB1-0303_DQA1-0201;DQB1-0302_DQA1-0301;DQB1-0201_DQA1-0201;DQB1-0601_DQA1-0103;DQB1-0301_DQA1-0505;DQB1-0301_DQA1-0501;DQB1-0202_DQA1-0201	0.763601518	0.755068101	0.595964994
orf1ab polyprotein	2605	2629	PMEKLKTLVATAEAELAKNVSLDNV	DQB1-0201_DQA1-0501;DRB1_1503;DQB1-0303_DQA1-0201;DQB1-0302_DQA1-0301;DQB1-0201_DQA1-0201;DQB1-0601_DQA1-0103;DQB1-0301_DQA1-0505;DQB1-0301_DQA1-0501;DQB1-0202_DQA1-0201	0.763601518	0.755068101	0.595964994
orf1ab polyprotein	2603	2627	NVPMEKLKTLVATAEAELAKNVSLD	DQB1-0201_DQA1-0501;DRB1_1503;DQB1-0303_DQA1-0201;DQB1-0302_DQA1-0301;DQB1-0201_DQA1-0201;DQB1-0601_DQA1-0103;DQB1-0301_DQA1-0505;DQB1-0301_DQA1-0501;DQB1-0202_DQA1-0201	0.763601518	0.755068101	0.595964994
orf1a polyprotein	2603	2627	NVPMEKLKTLVATAEAELAKNVSLD	DQB1-0201_DQA1-0501;DRB1_1503;DQB1-0303_DQA1-0201;DQB1-0302_DQA1-0301;DQB1-0201_DQA1-0201;DQB1-0601_DQA1-0103;DQB1-0301_DQA1-0505;DQB1-0301_DQA1-0501;DQB1-0202_DQA1-0201	0.763601518	0.755068101	0.595964994
orf1ab polyprotein	2604	2628	VPMEKLKTLVATAEAELAKNVSLDN	DQB1-0201_DQA1-0501;DRB1_1503;DQB1-0303_DQA1-0201;DQB1-0302_DQA1-0301;DQB1-0201_DQA1-0201;DQB1-0601_DQA1-0103;DQB1-0301_DQA1-0505;DQB1-0301_DQA1-0501;DQB1-0202_DQA1-0201	0.763601518	0.755068101	0.595964994
orf1ab polyprotein	5440	5464	NAGDYILANTCTERLKLFAAETLKA	DRB3_0202;DQB1-0501_DQA1-0101;DRB5_0101;DRB3_0201;DRB1_1402;DRB1_0803;DRB1_0405;DRB1_0701;DRB1_1406;DQB1-0202_DQA1-0201;DRB1_0801	0.810767076	0.811679571	0.401839168
orf1ab polyprotein	5439	5463	TNAGDYILANTCTERLKLFAAETLK	DRB3_0202;DQB1-0501_DQA1-0101;DRB5_0101;DRB3_0201;DRB1_1402;DRB1_0803;DRB1_0405;DRB1_0701;DRB1_1406;DQB1-0202_DQA1-0201;DRB1_0801	0.810767076	0.811679571	0.401839168
orf1a polyprotein	3293	3317	LWLDDVVYCPRHVICTSEDMLNPNY	DPB1-1001_DPA1-0201;DQB1-0201_DQA1-0501;DQB1-0401_DQA1-0301;DRB1_1102;DRB1_1301;DRB1_1503;DPB1-0101_DPA1-0103;DQB1-0201_DQA1-0201;DQB1-0302_DQA1-0301;DPB1-1701_DPA1-0201;DRB1_1405;DRB1_1302;DRB1_0406;DPB1-1101_DPA1-0201;DRB1_1401;DRB1_1404;DRB1_1406;DQB1-0603_DQA1-0103;DQB1-0202_DQA1-0201	0.772303997	0.757744661	0.568640255
orf1ab polyprotein	3293	3317	LWLDDVVYCPRHVICTSEDMLNPNY	DPB1-1001_DPA1-0201;DQB1-0201_DQA1-0501;DQB1-0401_DQA1-0301;DRB1_1102;DRB1_1301;DRB1_1503;DPB1-0101_DPA1-0103;DQB1-0201_DQA1-0201;DQB1-0302_DQA1-0301;DPB1-1701_DPA1-0201;DRB1_1405;DRB1_1302;DRB1_0406;DPB1-1101_DPA1-0201;DRB1_1401;DRB1_1404;DRB1_1406;DQB1-0603_DQA1-0103;DQB1-0202_DQA1-0201	0.772303997	0.757744661	0.568640255
ORF3a protein	109	133	YALVYFLQSINFVRIIMRLWLCWKC	DPB1-0401_DPA1-0103;DRB5_0102;DRB1_1202;DRB1_0406;DRB1_1201;DRB1_1401;DPB1-0402_DPA1-0103;DRB1_1404	0.820976079	0.817162709	0.452907685
orf1ab polyprotein	4179	4203	RFVLALLSDLQDLKWARFPKSDGTG	DPB1-0401_DPA1-0103;DQB1-0601_DQA1-0102;DQB1-0502_DQA1-0102;DRB1_1202;DRB1_1201;DPB1-0402_DPA1-0103	0.808766482	0.805094961	0.519740045
orf1a polyprotein	4180	4204	FVLALLSDLQDLKWARFPKSDGTGT	DPB1-0401_DPA1-0103;DQB1-0601_DQA1-0102;DQB1-0502_DQA1-0102;DRB1_1202;DRB1_1201;DPB1-0402_DPA1-0103	0.808766482	0.805094961	0.519740045
orf1a polyprotein	4181	4205	VLALLSDLQDLKWARFPKSDGTGTI	DPB1-0401_DPA1-0103;DQB1-0601_DQA1-0102;DQB1-0502_DQA1-0102;DRB1_1202;DRB1_1201;DPB1-0402_DPA1-0103	0.808766482	0.805094961	0.519740045
orf1ab polyprotein	4181	4205	VLALLSDLQDLKWARFPKSDGTGTI	DPB1-0401_DPA1-0103;DQB1-0601_DQA1-0102;DQB1-0502_DQA1-0102;DRB1_1202;DRB1_1201;DPB1-0402_DPA1-0103	0.808766482	0.805094961	0.519740045
orf1a polyprotein	4179	4203	RFVLALLSDLQDLKWARFPKSDGTG	DPB1-0401_DPA1-0103;DQB1-0601_DQA1-0102;DQB1-0502_DQA1-0102;DRB1_1202;DRB1_1201;DPB1-0402_DPA1-0103	0.808766482	0.805094961	0.519740045
orf1ab polyprotein	4180	4204	FVLALLSDLQDLKWARFPKSDGTGT	DPB1-0401_DPA1-0103;DQB1-0601_DQA1-0102;DQB1-0502_DQA1-0102;DRB1_1202;DRB1_1201;DPB1-0402_DPA1-0103	0.808766482	0.805094961	0.519740045
orf1a polyprotein	2600	2624	STFNVPMEKLKTLVATAEAELAKNV	DQB1-0201_DQA1-0501;DRB1_1503;DQB1-0303_DQA1-0201;DQB1-0302_DQA1-0301;DRB1_0404;DQB1-0601_DQA1-0103;DQB1-0301_DQA1-0505;DQB1-0301_DQA1-0501;DQB1-0202_DQA1-0201	0.779574769	0.772549555	0.528946546
orf1a polyprotein	2599	2623	SSTFNVPMEKLKTLVATAEAELAKN	DQB1-0201_DQA1-0501;DRB1_1503;DQB1-0303_DQA1-0201;DQB1-0302_DQA1-0301;DRB1_0404;DQB1-0601_DQA1-0103;DQB1-0301_DQA1-0505;DQB1-0301_DQA1-0501;DQB1-0202_DQA1-0201	0.779574769	0.772549555	0.528946546
orf1ab polyprotein	2600	2624	STFNVPMEKLKTLVATAEAELAKNV	DQB1-0201_DQA1-0501;DRB1_1503;DQB1-0303_DQA1-0201;DQB1-0302_DQA1-0301;DRB1_0404;DQB1-0601_DQA1-0103;DQB1-0301_DQA1-0505;DQB1-0301_DQA1-0501;DQB1-0202_DQA1-0201	0.779574769	0.772549555	0.528946546
orf1ab polyprotein	2599	2623	SSTFNVPMEKLKTLVATAEAELAKN	DQB1-0201_DQA1-0501;DRB1_1503;DQB1-0303_DQA1-0201;DQB1-0302_DQA1-0301;DRB1_0404;DQB1-0601_DQA1-0103;DQB1-0301_DQA1-0505;DQB1-0301_DQA1-0501;DQB1-0202_DQA1-0201	0.779574769	0.772549555	0.528946546
orf1a polyprotein	659	683	IVGGQIVTCAKEIKESVQTFFKLVN	DPB1-1001_DPA1-0201;DRB1_1102;DRB1_1301;DRB1_0301;DQB1-0302_DQA1-0301;DQB1-0301_DQA1-0303;DRB1_0901;DPB1-1701_DPA1-0201;DRB1_0406;DRB1_1405;DRB1_0302;DPB1-1101_DPA1-0201;DRB1_0701;DPB1-0901_DPA1-0201;DRB1_1406	0.720189568	0.728987475	0.666519145
orf1ab polyprotein	659	683	IVGGQIVTCAKEIKESVQTFFKLVN	DPB1-1001_DPA1-0201;DRB1_1102;DRB1_1301;DRB1_0301;DQB1-0302_DQA1-0301;DQB1-0301_DQA1-0303;DRB1_0901;DPB1-1701_DPA1-0201;DRB1_0406;DRB1_1405;DRB1_0302;DPB1-1101_DPA1-0201;DRB1_0701;DPB1-0901_DPA1-0201;DRB1_1406	0.720189568	0.728987475	0.666519145
orf1a polyprotein	2343	2367	LAAIMQLFFSYFAVHFISNSWLMWL	DPB1-0401_DPA1-0103;DQB1-0201_DQA1-0501;DRB1_0406;DRB1_1501;DRB1_1404	0.809910465	0.822698883	0.376312989
orf1ab polyprotein	2345	2369	AIMQLFFSYFAVHFISNSWLMWLII	DPB1-0401_DPA1-0103;DQB1-0201_DQA1-0501;DRB1_0406;DRB1_1501;DRB1_1404	0.809910465	0.822698883	0.376312989
orf1a polyprotein	2342	2366	GLAAIMQLFFSYFAVHFISNSWLMW	DPB1-0401_DPA1-0103;DQB1-0201_DQA1-0501;DRB1_0406;DRB1_1501;DRB1_1404	0.809910465	0.822698883	0.376312989
orf1ab polyprotein	2344	2368	AAIMQLFFSYFAVHFISNSWLMWLI	DPB1-0401_DPA1-0103;DQB1-0201_DQA1-0501;DRB1_0406;DRB1_1501;DRB1_1404	0.809910465	0.822698883	0.376312989
orf1a polyprotein	2344	2368	AAIMQLFFSYFAVHFISNSWLMWLI	DPB1-0401_DPA1-0103;DQB1-0201_DQA1-0501;DRB1_0406;DRB1_1501;DRB1_1404	0.809910465	0.822698883	0.376312989
orf1ab polyprotein	2343	2367	LAAIMQLFFSYFAVHFISNSWLMWL	DPB1-0401_DPA1-0103;DQB1-0201_DQA1-0501;DRB1_0406;DRB1_1501;DRB1_1404	0.809910465	0.822698883	0.376312989
orf1a polyprotein	2345	2369	AIMQLFFSYFAVHFISNSWLMWLII	DPB1-0401_DPA1-0103;DQB1-0201_DQA1-0501;DRB1_0406;DRB1_1501;DRB1_1404	0.809910465	0.822698883	0.376312989
orf1ab polyprotein	2342	2366	GLAAIMQLFFSYFAVHFISNSWLMW	DPB1-0401_DPA1-0103;DQB1-0201_DQA1-0501;DRB1_0406;DRB1_1501;DRB1_1404	0.809910465	0.822698883	0.376312989
orf1a polyprotein	614	638	TNIFGTVYEKLKPVLDWLEEKFKEG	DPB1-0401_DPA1-0103;DRB1_0410;DPB1-0101_DPA1-0103;DQB1-0302_DQA1-0301;DQB1-0604_DQA1-0102;DRB1_0411;DRB1_0405;DRB1_0803;DRB1_0101;DRB1_1001	0.803950322	0.804998901	0.449740126
orf1ab polyprotein	614	638	TNIFGTVYEKLKPVLDWLEEKFKEG	DPB1-0401_DPA1-0103;DRB1_0410;DPB1-0101_DPA1-0103;DQB1-0302_DQA1-0301;DQB1-0604_DQA1-0102;DRB1_0411;DRB1_0405;DRB1_0803;DRB1_0101;DRB1_1001	0.803950322	0.804998901	0.449740126
orf1a polyprotein	1346	1370	LKKCKSAFYILPSIISNEKQEILGT	DQB1-0201_DQA1-0501;DRB1_1602;DRB1_1301;DRB1_0404;DRB1_0401;DRB1_0407;DRB1_0403;DRB1_1101;DRB1_1601;DRB1_1405;DRB1_0406;DRB1_1402;DRB1_0302;DRB1_0405;DRB1_0402;DRB1_1401;DRB1_1404;DRB3_0301;DRB1_0101;DRB1_1406	0.741465721	0.753690072	0.599076401
orf1ab polyprotein	1346	1370	LKKCKSAFYILPSIISNEKQEILGT	DQB1-0201_DQA1-0501;DRB1_1602;DRB1_1301;DRB1_0404;DRB1_0401;DRB1_0407;DRB1_0403;DRB1_1101;DRB1_1601;DRB1_1405;DRB1_0406;DRB1_1402;DRB1_0302;DRB1_0405;DRB1_0402;DRB1_1401;DRB1_1404;DRB3_0301;DRB1_0101;DRB1_1406	0.741465721	0.753690072	0.599076401
orf1a polyprotein	1791	1815	KQATKYLVQQESPFVMMSAPPAQYE	DRB1_1602;DRB1_1502;DRB1_0404;DRB3_0202;DRB1_0407;DRB1_1101;DRB5_0102;DRB1_1601;DRB1_1303;DRB5_0101;DRB1_0405;DRB1_0804;DRB1_0102;DRB1_0101;DRB1_1001;DRB1_0802;DRB1_0801	0.792371434	0.774439443	0.505692575
orf1ab polyprotein	1799	1823	QQESPFVMMSAPPAQYELKHGTFTC	DRB1_1602;DRB1_1502;DRB1_0404;DRB3_0202;DRB1_0407;DRB1_1101;DRB5_0102;DRB1_1601;DRB1_1303;DRB5_0101;DRB1_0405;DRB1_0804;DRB1_0102;DRB1_0101;DRB1_1001;DRB1_0802;DRB1_0801	0.792371434	0.774439443	0.505692575
orf1ab polyprotein	1798	1822	VQQESPFVMMSAPPAQYELKHGTFT	DRB1_1602;DRB1_1502;DRB1_0404;DRB3_0202;DRB1_0407;DRB1_1101;DRB5_0102;DRB1_1601;DRB1_1303;DRB5_0101;DRB1_0405;DRB1_0804;DRB1_0102;DRB1_0101;DRB1_1001;DRB1_0802;DRB1_0801	0.792371434	0.774439443	0.505692575
orf1a polyprotein	1800	1824	QESPFVMMSAPPAQYELKHGTFTCA	DRB1_1602;DRB1_1502;DRB1_0404;DRB3_0202;DRB1_0407;DRB1_1101;DRB5_0102;DRB1_1601;DRB1_1303;DRB5_0101;DRB1_0405;DRB1_0804;DRB1_0102;DRB1_0101;DRB1_1001;DRB1_0802;DRB1_0801	0.792371434	0.774439443	0.505692575
orf1ab polyprotein	1791	1815	KQATKYLVQQESPFVMMSAPPAQYE	DRB1_1602;DRB1_1502;DRB1_0404;DRB3_0202;DRB1_0407;DRB1_1101;DRB5_0102;DRB1_1601;DRB1_1303;DRB5_0101;DRB1_0405;DRB1_0804;DRB1_0102;DRB1_0101;DRB1_1001;DRB1_0802;DRB1_0801	0.792371434	0.774439443	0.505692575
orf1ab polyprotein	1800	1824	QESPFVMMSAPPAQYELKHGTFTCA	DRB1_1602;DRB1_1502;DRB1_0404;DRB3_0202;DRB1_0407;DRB1_1101;DRB5_0102;DRB1_1601;DRB1_1303;DRB5_0101;DRB1_0405;DRB1_0804;DRB1_0102;DRB1_0101;DRB1_1001;DRB1_0802;DRB1_0801	0.792371434	0.774439443	0.505692575
orf1a polyprotein	1799	1823	QQESPFVMMSAPPAQYELKHGTFTC	DRB1_1602;DRB1_1502;DRB1_0404;DRB3_0202;DRB1_0407;DRB1_1101;DRB5_0102;DRB1_1601;DRB1_1303;DRB5_0101;DRB1_0405;DRB1_0804;DRB1_0102;DRB1_0101;DRB1_1001;DRB1_0802;DRB1_0801	0.792371434	0.774439443	0.505692575
orf1a polyprotein	1798	1822	VQQESPFVMMSAPPAQYELKHGTFT	DRB1_1602;DRB1_1502;DRB1_0404;DRB3_0202;DRB1_0407;DRB1_1101;DRB5_0102;DRB1_1601;DRB1_1303;DRB5_0101;DRB1_0405;DRB1_0804;DRB1_0102;DRB1_0101;DRB1_1001;DRB1_0802;DRB1_0801	0.792371434	0.774439443	0.505692575
orf1ab polyprotein	3944	3968	IASEFSSLPSYAAFATAQEAYEQAV	DRB1_0410;DQB1-0602_DQA1-0102;DQB1-0502_DQA1-0102;DRB1_1502;DQB1-0302_DQA1-0301;DRB1_0404;DRB1_1601;DRB1_0405;DRB1_0402;DQB1-0301_DQA1-0505;DQB1-0202_DQA1-0201;DRB1_0801	0.782078524	0.781116493	0.526125045
orf1a polyprotein	3944	3968	IASEFSSLPSYAAFATAQEAYEQAV	DRB1_0410;DQB1-0602_DQA1-0102;DQB1-0502_DQA1-0102;DRB1_1502;DQB1-0302_DQA1-0301;DRB1_0404;DRB1_1601;DRB1_0405;DRB1_0402;DQB1-0301_DQA1-0505;DQB1-0202_DQA1-0201;DRB1_0801	0.782078524	0.781116493	0.526125045
nucleocapsid phosphoprotein	211	235	AGNGGDAALALLLLDRLNQLESKMS	DRB1_1102;DRB1_1301;DRB1_1101;DRB3_0301;DRB1_1405;DQB1-0303_DQA1-0301;DRB1_0804;DRB4_0103;DRB1_1104;DRB3_0101;DRB1_1406	0.825313968	0.821672229	0.411627762
nucleocapsid phosphoprotein	213	237	NGGDAALALLLLDRLNQLESKMSGK	DRB1_1102;DRB1_1301;DRB1_1101;DRB3_0301;DRB1_1405;DQB1-0303_DQA1-0301;DRB1_0804;DRB4_0103;DRB1_1104;DRB3_0101;DRB1_1406	0.825313968	0.821672229	0.411627762
nucleocapsid phosphoprotein	210	234	MAGNGGDAALALLLLDRLNQLESKM	DRB1_1102;DRB1_1301;DRB1_1101;DRB3_0301;DRB1_1405;DQB1-0303_DQA1-0301;DRB1_0804;DRB4_0103;DRB1_1104;DRB3_0101;DRB1_1406	0.825313968	0.821672229	0.411627762
nucleocapsid phosphoprotein	212	236	GNGGDAALALLLLDRLNQLESKMSG	DRB1_1102;DRB1_1301;DRB1_1101;DRB3_0301;DRB1_1405;DQB1-0303_DQA1-0301;DRB1_0804;DRB4_0103;DRB1_1104;DRB3_0101;DRB1_1406	0.825313968	0.821672229	0.411627762
orf1ab polyprotein	268	292	GECPNFVFPLNSIIKTIQPRVEKKK	DQB1-0303_DQA1-0201;DQB1-0301_DQA1-0601;DPB1-0501_DPA1-0202;DQB1-0201_DQA1-0201;DQB1-0302_DQA1-0301;DRB5_0101;DRB1_0302;DQB1-0603_DQA1-0103;DQB1-0202_DQA1-0201	0.680137901	0.673598419	0.785416114
orf1a polyprotein	268	292	GECPNFVFPLNSIIKTIQPRVEKKK	DQB1-0303_DQA1-0201;DQB1-0301_DQA1-0601;DPB1-0501_DPA1-0202;DQB1-0201_DQA1-0201;DQB1-0302_DQA1-0301;DRB5_0101;DRB1_0302;DQB1-0603_DQA1-0103;DQB1-0202_DQA1-0201	0.680137901	0.673598419	0.785416114
orf1ab polyprotein	2085	2109	KITEEVGHTDLMAAYVDNSSLTIKK	DQB1-0602_DQA1-0102;DQB1-0502_DQA1-0102;DRB3_0202;DQB1-0501_DQA1-0101;DRB4_0103	0.832178029	0.832178029	0.274096
orf1a polyprotein	2085	2109	KITEEVGHTDLMAAYVDNSSLTIKK	DQB1-0602_DQA1-0102;DQB1-0502_DQA1-0102;DRB3_0202;DQB1-0501_DQA1-0101;DRB4_0103	0.832178029	0.832178029	0.274096
orf1ab polyprotein	2086	2110	ITEEVGHTDLMAAYVDNSSLTIKKP	DQB1-0602_DQA1-0102;DQB1-0502_DQA1-0102;DRB3_0202;DQB1-0501_DQA1-0101;DRB4_0103	0.832178029	0.832178029	0.274096
orf1a polyprotein	2086	2110	ITEEVGHTDLMAAYVDNSSLTIKKP	DQB1-0602_DQA1-0102;DQB1-0502_DQA1-0102;DRB3_0202;DQB1-0501_DQA1-0101;DRB4_0103	0.832178029	0.832178029	0.274096
orf1ab polyprotein	5644	5668	KALKYLPIDKCSRIIPARARVECFD	DQB1-0602_DQA1-0102;DQB1-0303_DQA1-0201;DQB1-0302_DQA1-0301;DRB1_0404;DRB1_0901;DRB5_0202;DQB1-0303_DQA1-0301;DRB4_0103	0.767368384	0.763856485	0.557672957
surface glycoprotein	1054	1078	QSAPHGVVFLHVTYVPAQEKNFTTA	DPB1-0401_DPA1-0103;DRB1_1102;DQB1-0502_DQA1-0102;DQB1-0302_DQA1-0301;DRB1_0403;DRB1_0901;DRB5_0202;DPB1-1101_DPA1-0201;DRB1_0402;DRB1_1404	0.793678666	0.784082752	0.529333825
surface glycoprotein	1053	1077	PQSAPHGVVFLHVTYVPAQEKNFTT	DPB1-0401_DPA1-0103;DRB1_1102;DQB1-0502_DQA1-0102;DQB1-0302_DQA1-0301;DRB1_0403;DRB1_0901;DRB5_0202;DPB1-1101_DPA1-0201;DRB1_0402;DRB1_1404	0.793678666	0.784082752	0.529333825
surface glycoprotein	1052	1076	FPQSAPHGVVFLHVTYVPAQEKNFT	DPB1-0401_DPA1-0103;DRB1_1102;DQB1-0502_DQA1-0102;DQB1-0302_DQA1-0301;DRB1_0403;DRB1_0901;DRB5_0202;DPB1-1101_DPA1-0201;DRB1_0402;DRB1_1404	0.793678666	0.784082752	0.529333825
surface glycoprotein	1055	1079	SAPHGVVFLHVTYVPAQEKNFTTAP	DPB1-0401_DPA1-0103;DRB1_1102;DQB1-0502_DQA1-0102;DQB1-0302_DQA1-0301;DRB1_0403;DRB1_0901;DRB5_0202;DPB1-1101_DPA1-0201;DRB1_0402;DRB1_1404	0.793678666	0.784082752	0.529333825
surface glycoprotein	1056	1080	APHGVVFLHVTYVPAQEKNFTTAPA	DPB1-0401_DPA1-0103;DRB1_1102;DQB1-0502_DQA1-0102;DQB1-0302_DQA1-0301;DRB1_0403;DRB1_0901;DRB5_0202;DPB1-1101_DPA1-0201;DRB1_0402;DRB1_1404	0.793678666	0.784082752	0.529333825
orf1ab polyprotein	4984	5008	SKFYGGWHNMLKTVYSDVENPHLMG	DPB1-0401_DPA1-0103;DQB1-0201_DQA1-0501;DRB1_1602;DQB1-0201_DQA1-0201;DRB1_0411;DRB1_1402;DQB1-0202_DQA1-0201	0.824794183	0.819365319	0.317263342
orf1ab polyprotein	4986	5010	FYGGWHNMLKTVYSDVENPHLMGWD	DPB1-0401_DPA1-0103;DQB1-0201_DQA1-0501;DRB1_1602;DQB1-0201_DQA1-0201;DRB1_0411;DRB1_1402;DQB1-0202_DQA1-0201	0.824794183	0.819365319	0.317263342
orf1ab polyprotein	4985	5009	KFYGGWHNMLKTVYSDVENPHLMGW	DPB1-0401_DPA1-0103;DQB1-0201_DQA1-0501;DRB1_1602;DQB1-0201_DQA1-0201;DRB1_0411;DRB1_1402;DQB1-0202_DQA1-0201	0.824794183	0.819365319	0.317263342
orf1ab polyprotein	4988	5012	GGWHNMLKTVYSDVENPHLMGWDYP	DPB1-0401_DPA1-0103;DQB1-0201_DQA1-0501;DRB1_1602;DQB1-0201_DQA1-0201;DRB1_0411;DRB1_1402;DQB1-0202_DQA1-0201	0.824794183	0.819365319	0.317263342
orf1ab polyprotein	4987	5011	YGGWHNMLKTVYSDVENPHLMGWDY	DPB1-0401_DPA1-0103;DQB1-0201_DQA1-0501;DRB1_1602;DQB1-0201_DQA1-0201;DRB1_0411;DRB1_1402;DQB1-0202_DQA1-0201	0.824794183	0.819365319	0.317263342
orf1ab polyprotein	3159	3183	NYLKRRVVFNGVSFSTFEEAALCTF	DPB1-0401_DPA1-0103;DRB1_1503;DQB1-0202_DQA1-0201;DPB1-0402_DPA1-0103	0.845643103	0.84007119	0.210579709
orf1a polyprotein	3159	3183	NYLKRRVVFNGVSFSTFEEAALCTF	DPB1-0401_DPA1-0103;DRB1_1503;DQB1-0202_DQA1-0201;DPB1-0402_DPA1-0103	0.845643103	0.84007119	0.210579709
orf1ab polyprotein	3161	3185	LKRRVVFNGVSFSTFEEAALCTFLL	DPB1-0401_DPA1-0103;DRB1_1503;DQB1-0202_DQA1-0201;DPB1-0402_DPA1-0103	0.845643103	0.84007119	0.210579709
orf1ab polyprotein	3160	3184	YLKRRVVFNGVSFSTFEEAALCTFL	DPB1-0401_DPA1-0103;DRB1_1503;DQB1-0202_DQA1-0201;DPB1-0402_DPA1-0103	0.845643103	0.84007119	0.210579709
orf1a polyprotein	3160	3184	YLKRRVVFNGVSFSTFEEAALCTFL	DPB1-0401_DPA1-0103;DRB1_1503;DQB1-0202_DQA1-0201;DPB1-0402_DPA1-0103	0.845643103	0.84007119	0.210579709
orf1a polyprotein	3158	3182	SNYLKRRVVFNGVSFSTFEEAALCT	DPB1-0401_DPA1-0103;DRB1_1503;DQB1-0202_DQA1-0201;DPB1-0402_DPA1-0103	0.845643103	0.84007119	0.210579709
orf1a polyprotein	3161	3185	LKRRVVFNGVSFSTFEEAALCTFLL	DPB1-0401_DPA1-0103;DRB1_1503;DQB1-0202_DQA1-0201;DPB1-0402_DPA1-0103	0.845643103	0.84007119	0.210579709
orf1ab polyprotein	3158	3182	SNYLKRRVVFNGVSFSTFEEAALCT	DPB1-0401_DPA1-0103;DRB1_1503;DQB1-0202_DQA1-0201;DPB1-0402_DPA1-0103	0.845643103	0.84007119	0.210579709
orf1ab polyprotein	5766	5790	RRCPAEIVDTVSALVYDNKLKAHKD	DQB1-0303_DQA1-0201;DRB1_0301;DQB1-0201_DQA1-0201;DRB1_1101;DRB1_0406;DQB1-0601_DQA1-0103;DRB1_0701;DRB1_1104;DQB1-0301_DQA1-0505;DQB1-0202_DQA1-0201	0.754419957	0.782995543	0.515118988
orf1ab polyprotein	4989	5013	GWHNMLKTVYSDVENPHLMGWDYPK	DPB1-0401_DPA1-0103;DQB1-0201_DQA1-0501;DRB1_1602;DQB1-0201_DQA1-0201;DQB1-0202_DQA1-0201	0.821741675	0.819365319	0.316873234
orf1ab polyprotein	4990	5014	WHNMLKTVYSDVENPHLMGWDYPKC	DPB1-0401_DPA1-0103;DQB1-0201_DQA1-0501;DRB1_1602;DQB1-0201_DQA1-0201;DQB1-0202_DQA1-0201	0.821741675	0.819365319	0.316873234
orf1ab polyprotein	4991	5015	HNMLKTVYSDVENPHLMGWDYPKCD	DPB1-0401_DPA1-0103;DQB1-0201_DQA1-0501;DRB1_1602;DQB1-0201_DQA1-0201;DQB1-0202_DQA1-0201	0.821741675	0.819365319	0.316873234
ORF3a protein	158	182	IPYNSVTSSIVITSGDGTTSPISEH	DQB1-0201_DQA1-0501;DRB1_1602;DQB1-0602_DQA1-0102;DQB1-0303_DQA1-0201;DQB1-0302_DQA1-0301;DQB1-0301_DQA1-0505;DQB1-0301_DQA1-0601	0.777159691	0.774189014	0.516742272
orf1ab polyprotein	1801	1825	ESPFVMMSAPPAQYELKHGTFTCAS	DRB1_1602;DRB1_1502;DRB1_0404;DRB3_0202;DRB1_0407;DRB1_1101;DRB5_0102;DRB1_1303;DRB5_0101;DRB1_0405;DRB1_0804;DRB1_0102;DRB1_0101;DRB1_1001;DRB1_0802;DRB1_0801	0.787474298	0.767769566	0.505298778
orf1a polyprotein	1801	1825	ESPFVMMSAPPAQYELKHGTFTCAS	DRB1_1602;DRB1_1502;DRB1_0404;DRB3_0202;DRB1_0407;DRB1_1101;DRB5_0102;DRB1_1303;DRB5_0101;DRB1_0405;DRB1_0804;DRB1_0102;DRB1_0101;DRB1_1001;DRB1_0802;DRB1_0801	0.787474298	0.767769566	0.505298778
orf1ab polyprotein	5442	5466	GDYILANTCTERLKLFAAETLKATE	DRB3_0202;DQB1-0501_DQA1-0101;DRB5_0101;DRB3_0201;DRB1_1402;DRB1_0803;DRB1_0405;DRB1_1501;DRB1_1406;DQB1-0202_DQA1-0201	0.797486508	0.803971225	0.39082128
orf1a polyprotein	2864	2888	FVVPGLPGTILRTTNGDFLHFLPRV	DQB1-0201_DQA1-0501;DQB1-0401_DQA1-0301;DRB1_0403;DRB1_0406;DRB1_1401;DRB1_0701;DRB1_1404;DRB3_0301;DPB1-0201_DPA1-0103;DQB1-0202_DQA1-0201	0.718178725	0.725064703	0.648906292
orf1a polyprotein	2863	2887	GFVVPGLPGTILRTTNGDFLHFLPR	DQB1-0201_DQA1-0501;DQB1-0401_DQA1-0301;DRB1_0403;DRB1_0406;DRB1_1401;DRB1_0701;DRB1_1404;DRB3_0301;DPB1-0201_DPA1-0103;DQB1-0202_DQA1-0201	0.718178725	0.725064703	0.648906292
orf1ab polyprotein	2865	2889	VVPGLPGTILRTTNGDFLHFLPRVF	DQB1-0201_DQA1-0501;DQB1-0401_DQA1-0301;DRB1_0403;DRB1_0406;DRB1_1401;DRB1_0701;DRB1_1404;DRB3_0301;DPB1-0201_DPA1-0103;DQB1-0202_DQA1-0201	0.718178725	0.725064703	0.648906292
orf1ab polyprotein	2864	2888	FVVPGLPGTILRTTNGDFLHFLPRV	DQB1-0201_DQA1-0501;DQB1-0401_DQA1-0301;DRB1_0403;DRB1_0406;DRB1_1401;DRB1_0701;DRB1_1404;DRB3_0301;DPB1-0201_DPA1-0103;DQB1-0202_DQA1-0201	0.718178725	0.725064703	0.648906292
orf1a polyprotein	2865	2889	VVPGLPGTILRTTNGDFLHFLPRVF	DQB1-0201_DQA1-0501;DQB1-0401_DQA1-0301;DRB1_0403;DRB1_0406;DRB1_1401;DRB1_0701;DRB1_1404;DRB3_0301;DPB1-0201_DPA1-0103;DQB1-0202_DQA1-0201	0.718178725	0.725064703	0.648906292
orf1ab polyprotein	2863	2887	GFVVPGLPGTILRTTNGDFLHFLPR	DQB1-0201_DQA1-0501;DQB1-0401_DQA1-0301;DRB1_0403;DRB1_0406;DRB1_1401;DRB1_0701;DRB1_1404;DRB3_0301;DPB1-0201_DPA1-0103;DQB1-0202_DQA1-0201	0.718178725	0.725064703	0.648906292
orf1ab polyprotein	2027	2051	VLKSEDAQGMDNLACEDLKPVSEEV	DPB1-0401_DPA1-0103;DPB1-0201_DPA1-0103;DPB1-0202_DPA1-0103	0.803369835	0.803369835	0.411711
orf1a polyprotein	2027	2051	VLKSEDAQGMDNLACEDLKPVSEEV	DPB1-0401_DPA1-0103;DPB1-0201_DPA1-0103;DPB1-0202_DPA1-0103	0.803369835	0.803369835	0.411711
surface glycoprotein	32	56	FTRGVYYPDKVFRSSVLHSTQDLFL	DQB1-0603_DQA1-0103;DQB1-0602_DQA1-0102;DQB1-0303_DQA1-0201;DQB1-0604_DQA1-0102;DPB1-0402_DPA1-0103;DPB1-0201_DPA1-0103;DQB1-0301_DQA1-0505	0.780608473	0.780608473	0.493864509
surface glycoprotein	31	55	SFTRGVYYPDKVFRSSVLHSTQDLF	DQB1-0603_DQA1-0103;DQB1-0602_DQA1-0102;DQB1-0303_DQA1-0201;DQB1-0604_DQA1-0102;DPB1-0402_DPA1-0103;DPB1-0201_DPA1-0103;DQB1-0301_DQA1-0505	0.780608473	0.780608473	0.493864509
orf1ab polyprotein	3156	3180	FFSNYLKRRVVFNGVSFSTFEEAAL	DPB1-0401_DPA1-0103;DQB1-0202_DQA1-0201;DPB1-0402_DPA1-0103	0.8400104	0.8400104	0.209679
orf1ab polyprotein	3157	3181	FSNYLKRRVVFNGVSFSTFEEAALC	DPB1-0401_DPA1-0103;DQB1-0202_DQA1-0201;DPB1-0402_DPA1-0103	0.8400104	0.8400104	0.209679
orf1a polyprotein	3156	3180	FFSNYLKRRVVFNGVSFSTFEEAAL	DPB1-0401_DPA1-0103;DQB1-0202_DQA1-0201;DPB1-0402_DPA1-0103	0.8400104	0.8400104	0.209679
orf1a polyprotein	3157	3181	FSNYLKRRVVFNGVSFSTFEEAALC	DPB1-0401_DPA1-0103;DQB1-0202_DQA1-0201;DPB1-0402_DPA1-0103	0.8400104	0.8400104	0.209679
orf1ab polyprotein	3744	3768	YSGVVTTVMFLARGIVFMCVEYCPI	DPB1-0401_DPA1-0103;DQB1-0303_DQA1-0201;DQB1-0602_DQA1-0102;DPB1-0101_DPA1-0103;DQB1-0301_DQA1-0505	0.840291571	0.840291571	0.145344125
orf1a polyprotein	3744	3768	YSGVVTTVMFLARGIVFMCVEYCPI	DPB1-0401_DPA1-0103;DQB1-0303_DQA1-0201;DQB1-0602_DQA1-0102;DPB1-0101_DPA1-0103;DQB1-0301_DQA1-0505	0.840291571	0.840291571	0.145344125
orf1ab polyprotein	2877	2901	TNGDFLHFLPRVFSAVGNICYTPSK	DQB1-0201_DQA1-0501;DQB1-0401_DQA1-0301;DRB1_1102;DRB1_0403;DRB1_0404;DRB1_1101;DRB1_1402;DRB1_0102;DRB1_0804;DRB1_1401;DRB1_1104;DRB1_0802;DPB1-0201_DPA1-0103;DQB1-0301_DQA1-0505;DRB1_1406;DRB1_0801	0.741161768	0.720692027	0.617922871
orf1a polyprotein	2877	2901	TNGDFLHFLPRVFSAVGNICYTPSK	DQB1-0201_DQA1-0501;DQB1-0401_DQA1-0301;DRB1_1102;DRB1_0403;DRB1_0404;DRB1_1101;DRB1_1402;DRB1_0102;DRB1_0804;DRB1_1401;DRB1_1104;DRB1_0802;DPB1-0201_DPA1-0103;DQB1-0301_DQA1-0505;DRB1_1406;DRB1_0801	0.741161768	0.720692027	0.617922871
orf1a polyprotein	673	697	ESVQTFFKLVNKFLALCADSIIIGG	DQB1-0201_DQA1-0501;DRB1_1102;DPB1-0101_DPA1-0201;DRB1_1502;DRB1_1602;DRB1_1101;DRB1_1303;DRB1_1401;DRB1_0701;DRB1_0804;DRB1_1104;DRB1_0101;DRB1_1001;DRB1_0802	0.730777506	0.727402158	0.613686238
orf1ab polyprotein	673	697	ESVQTFFKLVNKFLALCADSIIIGG	DQB1-0201_DQA1-0501;DRB1_1102;DPB1-0101_DPA1-0201;DRB1_1502;DRB1_1602;DRB1_1101;DRB1_1303;DRB1_1401;DRB1_0701;DRB1_0804;DRB1_1104;DRB1_0101;DRB1_1001;DRB1_0802	0.730777506	0.727402158	0.613686238
orf1ab polyprotein	4755	4779	SSRLSFKELLVYAADPAMHAASGNL	DRB1_1503;DPB1-0101_DPA1-0201;DRB1_1502;DPB1-0101_DPA1-0103;DRB3_0202;DRB1_0401;DRB1_0403;DRB1_0404;DRB5_0202;DRB1_1501;DRB3_0101	0.78896919	0.809530035	0.381008702
orf1a polyprotein	4274	4298	VDAAKAYKDYLASGGQPITNCVKML	DPB1-0101_DPA1-0201;DRB1_1502;DPB1-0202_DPA1-0103;DRB1_0901;DRB1_1601;DPB1-0501_DPA1-0201;DRB1_0701;DRB1_1501;DRB1_0101;DQB1-0301_DQA1-0505	0.689677762	0.742235083	0.645113869
orf1ab polyprotein	4274	4298	VDAAKAYKDYLASGGQPITNCVKML	DPB1-0101_DPA1-0201;DRB1_1502;DPB1-0202_DPA1-0103;DRB1_0901;DRB1_1601;DPB1-0501_DPA1-0201;DRB1_0701;DRB1_1501;DRB1_0101;DQB1-0301_DQA1-0505	0.689677762	0.742235083	0.645113869
orf1a polyprotein	1541	1565	PTTFHLDGEVITFDNLKTLLSLREV	DRB1_1503;DRB1_0301;DRB1_0404;DRB1_0401;DRB1_0407;DRB1_1101;DRB1_0302;DRB1_0402;DRB1_1501;DRB3_0101	0.779514435	0.8160791	0.372530063
orf1ab polyprotein	1541	1565	PTTFHLDGEVITFDNLKTLLSLREV	DRB1_1503;DRB1_0301;DRB1_0404;DRB1_0401;DRB1_0407;DRB1_1101;DRB1_0302;DRB1_0402;DRB1_1501;DRB3_0101	0.779514435	0.8160791	0.372530063
envelope protein	50	74	SLVKPSFYVYSRVKNLNSSRVPDLL	DRB1_0901;DRB1_0407;DRB1_1101;DRB1_1202;DQB1-0601_DQA1-0103;DRB1_1201;DRB1_1302;DRB1_0102;DRB1_0701;DRB1_0101;DQB1-0301_DQA1-0505	0.698261019	0.699506145	0.683360877
envelope protein	51	75	LVKPSFYVYSRVKNLNSSRVPDLLV	DRB1_0901;DRB1_0407;DRB1_1101;DRB1_1202;DQB1-0601_DQA1-0103;DRB1_1201;DRB1_1302;DRB1_0102;DRB1_0701;DRB1_0101;DQB1-0301_DQA1-0505	0.698261019	0.699506145	0.683360877
orf1ab polyprotein	5643	5667	EKALKYLPIDKCSRIIPARARVECF	DQB1-0602_DQA1-0102;DQB1-0303_DQA1-0201;DQB1-0302_DQA1-0301;DRB1_0404;DRB1_0901;DQB1-0303_DQA1-0301;DRB4_0103	0.755285611	0.751591305	0.557672957
surface glycoprotein	308	332	VEKGIYQTSNFRVQPTESIVRFPNI	DRB1_1502;DPB1-0202_DPA1-0103;DRB1_0401;DRB1_0406;DRB1_0302;DRB1_0405;DRB1_0701;DRB4_0103;DRB1_0101;DRB1_1001	0.748180924	0.77436968	0.52265719
orf1ab polyprotein	5640	5664	ALCEKALKYLPIDKCSRIIPARARV	DQB1-0602_DQA1-0102;DQB1-0303_DQA1-0201;DQB1-0302_DQA1-0301;DRB1_0404;DRB1_1302;DQB1-0303_DQA1-0301;DRB1_1402;DRB4_0103	0.770147218	0.767926807	0.490284593
orf1ab polyprotein	5639	5663	DALCEKALKYLPIDKCSRIIPARAR	DQB1-0602_DQA1-0102;DQB1-0303_DQA1-0201;DQB1-0302_DQA1-0301;DRB1_0404;DRB1_1302;DQB1-0303_DQA1-0301;DRB1_1402;DRB4_0103	0.770147218	0.767926807	0.490284593
orf1ab polyprotein	5549	5573	FVLTSHTVMPLSAPTLVPQEHYVRI	DQB1-0201_DQA1-0501;DQB1-0303_DQA1-0201;DQB1-0302_DQA1-0301;DRB1_1202;DRB1_1201;DRB1_0102;DRB4_0103;DRB1_0101	0.780246821	0.784349973	0.433219226
orf1ab polyprotein	5548	5572	YFVLTSHTVMPLSAPTLVPQEHYVR	DQB1-0201_DQA1-0501;DQB1-0303_DQA1-0201;DQB1-0302_DQA1-0301;DRB1_1202;DRB1_1201;DRB1_0102;DRB4_0103;DRB1_0101	0.780246821	0.784349973	0.433219226
surface glycoprotein	798	822	GGFNFSQILPDPSKPSKRSFIEDLL	DPB1-0101_DPA1-0202;DQB1-0602_DQA1-0102;DQB1-0303_DQA1-0201;DRB1_0301;DRB1_0401;DRB1_0404;DRB1_0901;DRB1_0411;DRB1_1303;DRB1_0405;DRB3_0101;DRB1_1001	0.757100979	0.769543094	0.495248919
orf1ab polyprotein	5912	5936	TSLEIPRRNVATLQAENVTGLFKDC	DPB1-0101_DPA1-0202;DQB1-0201_DQA1-0501;DQB1-0303_DQA1-0201;DPB1-0101_DPA1-0103;DQB1-0302_DQA1-0301;DQB1-0201_DQA1-0201;DRB1_1202;DRB1_1201;DPB1-0301_DPA1-0103;DRB1_0102;DRB1_0101;DQB1-0202_DQA1-0201	0.76191363	0.762532511	0.505374652
orf1ab polyprotein	5910	5934	QFTSLEIPRRNVATLQAENVTGLFK	DPB1-0101_DPA1-0202;DQB1-0201_DQA1-0501;DQB1-0303_DQA1-0201;DPB1-0101_DPA1-0103;DQB1-0302_DQA1-0301;DQB1-0201_DQA1-0201;DRB1_1202;DRB1_1201;DPB1-0301_DPA1-0103;DRB1_0102;DRB1_0101;DQB1-0202_DQA1-0201	0.76191363	0.762532511	0.505374652
orf1ab polyprotein	5913	5937	SLEIPRRNVATLQAENVTGLFKDCS	DPB1-0101_DPA1-0202;DQB1-0201_DQA1-0501;DQB1-0303_DQA1-0201;DPB1-0101_DPA1-0103;DQB1-0302_DQA1-0301;DQB1-0201_DQA1-0201;DRB1_1202;DRB1_1201;DPB1-0301_DPA1-0103;DRB1_0102;DRB1_0101;DQB1-0202_DQA1-0201	0.76191363	0.762532511	0.505374652
orf1ab polyprotein	5911	5935	FTSLEIPRRNVATLQAENVTGLFKD	DPB1-0101_DPA1-0202;DQB1-0201_DQA1-0501;DQB1-0303_DQA1-0201;DPB1-0101_DPA1-0103;DQB1-0302_DQA1-0301;DQB1-0201_DQA1-0201;DRB1_1202;DRB1_1201;DPB1-0301_DPA1-0103;DRB1_0102;DRB1_0101;DQB1-0202_DQA1-0201	0.76191363	0.762532511	0.505374652
orf1a polyprotein	2609	2633	LKTLVATAEAELAKNVSLDNVLSTF	DQB1-0201_DQA1-0501;DRB1_1503;DQB1-0303_DQA1-0201;DQB1-0302_DQA1-0301;DQB1-0601_DQA1-0103;DRB3_0201;DQB1-0301_DQA1-0505;DQB1-0301_DQA1-0501;DQB1-0202_DQA1-0201	0.764546166	0.756046849	0.520298328
orf1ab polyprotein	2609	2633	LKTLVATAEAELAKNVSLDNVLSTF	DQB1-0201_DQA1-0501;DRB1_1503;DQB1-0303_DQA1-0201;DQB1-0302_DQA1-0301;DQB1-0601_DQA1-0103;DRB3_0201;DQB1-0301_DQA1-0505;DQB1-0301_DQA1-0501;DQB1-0202_DQA1-0201	0.764546166	0.756046849	0.520298328
orf1a polyprotein	2607	2631	EKLKTLVATAEAELAKNVSLDNVLS	DQB1-0201_DQA1-0501;DRB1_1503;DQB1-0303_DQA1-0201;DQB1-0302_DQA1-0301;DQB1-0601_DQA1-0103;DQB1-0301_DQA1-0505;DQB1-0301_DQA1-0501;DQB1-0202_DQA1-0201	0.763601518	0.755068101	0.520298328
orf1a polyprotein	2608	2632	KLKTLVATAEAELAKNVSLDNVLST	DQB1-0201_DQA1-0501;DRB1_1503;DQB1-0303_DQA1-0201;DQB1-0302_DQA1-0301;DQB1-0601_DQA1-0103;DQB1-0301_DQA1-0505;DQB1-0301_DQA1-0501;DQB1-0202_DQA1-0201	0.763601518	0.755068101	0.520298328
orf1ab polyprotein	2608	2632	KLKTLVATAEAELAKNVSLDNVLST	DQB1-0201_DQA1-0501;DRB1_1503;DQB1-0303_DQA1-0201;DQB1-0302_DQA1-0301;DQB1-0601_DQA1-0103;DQB1-0301_DQA1-0505;DQB1-0301_DQA1-0501;DQB1-0202_DQA1-0201	0.763601518	0.755068101	0.520298328
orf1ab polyprotein	2607	2631	EKLKTLVATAEAELAKNVSLDNVLS	DQB1-0201_DQA1-0501;DRB1_1503;DQB1-0303_DQA1-0201;DQB1-0302_DQA1-0301;DQB1-0601_DQA1-0103;DQB1-0301_DQA1-0505;DQB1-0301_DQA1-0501;DQB1-0202_DQA1-0201	0.763601518	0.755068101	0.520298328
orf1ab polyprotein	1348	1372	KCKSAFYILPSIISNEKQEILGTVS	DQB1-0201_DQA1-0501;DRB1_1602;DRB1_1301;DRB1_0404;DRB1_0401;DRB1_0407;DRB1_1101;DRB1_1601;DRB1_1405;DRB1_0406;DRB1_1402;DRB1_0302;DRB1_0405;DRB1_0402;DRB1_1401;DRB1_1404;DRB3_0301;DRB1_0101;DRB1_1406	0.733306152	0.748939076	0.55713999
orf1a polyprotein	1348	1372	KCKSAFYILPSIISNEKQEILGTVS	DQB1-0201_DQA1-0501;DRB1_1602;DRB1_1301;DRB1_0404;DRB1_0401;DRB1_0407;DRB1_1101;DRB1_1601;DRB1_1405;DRB1_0406;DRB1_1402;DRB1_0302;DRB1_0405;DRB1_0402;DRB1_1401;DRB1_1404;DRB3_0301;DRB1_0101;DRB1_1406	0.733306152	0.748939076	0.55713999
orf1a polyprotein	1349	1373	CKSAFYILPSIISNEKQEILGTVSW	DQB1-0201_DQA1-0501;DRB1_1602;DRB1_1301;DRB1_0404;DRB1_0401;DRB1_0407;DRB1_1101;DRB1_1601;DRB1_1405;DRB1_0406;DRB1_1402;DRB1_0302;DRB1_0405;DRB1_0402;DRB1_1401;DRB1_1404;DRB3_0301;DRB1_0101;DRB1_1406	0.733306152	0.748939076	0.55713999
orf1a polyprotein	1347	1371	KKCKSAFYILPSIISNEKQEILGTV	DQB1-0201_DQA1-0501;DRB1_1602;DRB1_1301;DRB1_0404;DRB1_0401;DRB1_0407;DRB1_1101;DRB1_1601;DRB1_1405;DRB1_0406;DRB1_1402;DRB1_0302;DRB1_0405;DRB1_0402;DRB1_1401;DRB1_1404;DRB3_0301;DRB1_0101;DRB1_1406	0.733306152	0.748939076	0.55713999
orf1ab polyprotein	1349	1373	CKSAFYILPSIISNEKQEILGTVSW	DQB1-0201_DQA1-0501;DRB1_1602;DRB1_1301;DRB1_0404;DRB1_0401;DRB1_0407;DRB1_1101;DRB1_1601;DRB1_1405;DRB1_0406;DRB1_1402;DRB1_0302;DRB1_0405;DRB1_0402;DRB1_1401;DRB1_1404;DRB3_0301;DRB1_0101;DRB1_1406	0.733306152	0.748939076	0.55713999
orf1ab polyprotein	1347	1371	KKCKSAFYILPSIISNEKQEILGTV	DQB1-0201_DQA1-0501;DRB1_1602;DRB1_1301;DRB1_0404;DRB1_0401;DRB1_0407;DRB1_1101;DRB1_1601;DRB1_1405;DRB1_0406;DRB1_1402;DRB1_0302;DRB1_0405;DRB1_0402;DRB1_1401;DRB1_1404;DRB3_0301;DRB1_0101;DRB1_1406	0.733306152	0.748939076	0.55713999
orf1ab polyprotein	1319	1343	KVPTDNYITTYPGQGLNGYTVEEAK	DRB1_1503;DQB1-0401_DQA1-0301;DQB1-0303_DQA1-0201;DQB1-0502_DQA1-0102;DQB1-0602_DQA1-0102;DRB1_1502;DRB5_0202;DRB1_1101;DQB1-0501_DQA1-0101;DQB1-0402_DQA1-0401;DRB1_1501;DRB1_0802	0.726054242	0.723070647	0.603817976
orf1a polyprotein	1319	1343	KVPTDNYITTYPGQGLNGYTVEEAK	DRB1_1503;DQB1-0401_DQA1-0301;DQB1-0303_DQA1-0201;DQB1-0502_DQA1-0102;DQB1-0602_DQA1-0102;DRB1_1502;DRB5_0202;DRB1_1101;DQB1-0501_DQA1-0101;DQB1-0402_DQA1-0401;DRB1_1501;DRB1_0802	0.726054242	0.723070647	0.603817976
orf1ab polyprotein	2862	2886	VGFVVPGLPGTILRTTNGDFLHFLP	DQB1-0201_DQA1-0501;DRB1_0403;DRB1_0406;DRB1_1401;DRB1_0701;DRB1_1404;DRB3_0301;DPB1-0201_DPA1-0103;DQB1-0202_DQA1-0201	0.718178725	0.725064703	0.616858915
orf1a polyprotein	2862	2886	VGFVVPGLPGTILRTTNGDFLHFLP	DQB1-0201_DQA1-0501;DRB1_0403;DRB1_0406;DRB1_1401;DRB1_0701;DRB1_1404;DRB3_0301;DPB1-0201_DPA1-0103;DQB1-0202_DQA1-0201	0.718178725	0.725064703	0.616858915
orf1ab polyprotein	4184	4208	LLSDLQDLKWARFPKSDGTGTIYTE	DPB1-0401_DPA1-0103;DQB1-0601_DQA1-0102;DRB1_1202;DRB1_1201;DPB1-0402_DPA1-0103	0.804092923	0.800331673	0.429656126
orf1ab polyprotein	4183	4207	ALLSDLQDLKWARFPKSDGTGTIYT	DPB1-0401_DPA1-0103;DQB1-0601_DQA1-0102;DRB1_1202;DRB1_1201;DPB1-0402_DPA1-0103	0.804092923	0.800331673	0.429656126
orf1a polyprotein	4182	4206	LALLSDLQDLKWARFPKSDGTGTIY	DPB1-0401_DPA1-0103;DQB1-0601_DQA1-0102;DRB1_1202;DRB1_1201;DPB1-0402_DPA1-0103	0.804092923	0.800331673	0.429656126
orf1a polyprotein	4184	4208	LLSDLQDLKWARFPKSDGTGTIYTE	DPB1-0401_DPA1-0103;DQB1-0601_DQA1-0102;DRB1_1202;DRB1_1201;DPB1-0402_DPA1-0103	0.804092923	0.800331673	0.429656126
orf1a polyprotein	4183	4207	ALLSDLQDLKWARFPKSDGTGTIYT	DPB1-0401_DPA1-0103;DQB1-0601_DQA1-0102;DRB1_1202;DRB1_1201;DPB1-0402_DPA1-0103	0.804092923	0.800331673	0.429656126
orf1ab polyprotein	4182	4206	LALLSDLQDLKWARFPKSDGTGTIY	DPB1-0401_DPA1-0103;DQB1-0601_DQA1-0102;DRB1_1202;DRB1_1201;DPB1-0402_DPA1-0103	0.804092923	0.800331673	0.429656126
orf1a polyprotein	2948	2972	LRPDTRYVLMDGSIIQFPNTYLEGS	DRB1_1503;DRB1_1602;DRB1_1502;DRB1_0301;DRB1_1601;DRB1_0401;DRB5_0102;DRB1_0404;DRB5_0202;DRB1_1501;DRB1_0101;DRB1_1001	0.710876692	0.786416231	0.52500336
orf1ab polyprotein	2948	2972	LRPDTRYVLMDGSIIQFPNTYLEGS	DRB1_1503;DRB1_1602;DRB1_1502;DRB1_0301;DRB1_1601;DRB1_0401;DRB5_0102;DRB1_0404;DRB5_0202;DRB1_1501;DRB1_0101;DRB1_1001	0.710876692	0.786416231	0.52500336
surface glycoprotein	312	336	IYQTSNFRVQPTESIVRFPNITNLC	DRB1_1502;DRB1_0401;DRB1_0302;DRB1_0405;DRB1_1501;DRB4_0103;DRB1_0101;DRB1_1001	0.738160822	0.778787057	0.48968979
surface glycoprotein	313	337	YQTSNFRVQPTESIVRFPNITNLCP	DRB1_1502;DRB1_0401;DRB1_0302;DRB1_0405;DRB1_1501;DRB4_0103;DRB1_0101;DRB1_1001	0.738160822	0.778787057	0.48968979
surface glycoprotein	311	335	GIYQTSNFRVQPTESIVRFPNITNL	DRB1_1502;DRB1_0401;DRB1_0302;DRB1_0405;DRB1_1501;DRB4_0103;DRB1_0101;DRB1_1001	0.738160822	0.778787057	0.48968979
surface glycoprotein	310	334	KGIYQTSNFRVQPTESIVRFPNITN	DRB1_1502;DRB1_0401;DRB1_0302;DRB1_0405;DRB1_1501;DRB4_0103;DRB1_0101;DRB1_1001	0.738160822	0.778787057	0.48968979
orf1ab polyprotein	5501	5525	NRNYVFTGYRVTKNSKVQIGEYTFE	DRB1_1602;DQB1-0602_DQA1-0102;DRB1_1502;DRB1_1601;DRB3_0202;DRB1_0407;DRB1_0405;DRB1_0701;DRB1_1401;DRB1_1404;DRB1_0101	0.728811692	0.738759819	0.562549511
orf1ab polyprotein	5500	5524	LNRNYVFTGYRVTKNSKVQIGEYTF	DRB1_1602;DQB1-0602_DQA1-0102;DRB1_1502;DRB1_1601;DRB3_0202;DRB1_0407;DRB1_0405;DRB1_0701;DRB1_1401;DRB1_1404;DRB1_0101	0.728811692	0.738759819	0.562549511
orf1ab polyprotein	5499	5523	PLNRNYVFTGYRVTKNSKVQIGEYT	DRB1_1602;DQB1-0602_DQA1-0102;DRB1_1502;DRB1_1601;DRB3_0202;DRB1_0407;DRB1_0405;DRB1_0701;DRB1_1401;DRB1_1404;DRB1_0101	0.728811692	0.738759819	0.562549511
orf1ab polyprotein	5502	5526	RNYVFTGYRVTKNSKVQIGEYTFEK	DRB1_1602;DQB1-0602_DQA1-0102;DRB1_1502;DRB1_1601;DRB3_0202;DRB1_0407;DRB1_0405;DRB1_0701;DRB1_1401;DRB1_1404;DRB1_0101	0.728811692	0.738759819	0.562549511
orf1ab polyprotein	5503	5527	NYVFTGYRVTKNSKVQIGEYTFEKG	DRB1_1602;DQB1-0602_DQA1-0102;DRB1_1502;DRB1_1601;DRB3_0202;DRB1_0407;DRB1_0405;DRB1_0701;DRB1_1401;DRB1_1404;DRB1_0101	0.728811692	0.738759819	0.562549511
orf1ab polyprotein	5504	5528	YVFTGYRVTKNSKVQIGEYTFEKGD	DRB1_1602;DQB1-0602_DQA1-0102;DRB1_1502;DRB1_1601;DRB3_0202;DRB1_0407;DRB1_0405;DRB1_0701;DRB1_1401;DRB1_1404;DRB1_0101	0.728811692	0.738759819	0.562549511
orf1ab polyprotein	5505	5529	VFTGYRVTKNSKVQIGEYTFEKGDY	DRB1_1602;DQB1-0602_DQA1-0102;DRB1_1502;DRB1_1601;DRB3_0202;DRB1_0407;DRB1_0405;DRB1_0701;DRB1_1401;DRB1_1404;DRB1_0101	0.728811692	0.738759819	0.562549511
orf1ab polyprotein	5506	5530	FTGYRVTKNSKVQIGEYTFEKGDYG	DRB1_1602;DQB1-0602_DQA1-0102;DRB1_1502;DRB1_1601;DRB3_0202;DRB1_0407;DRB1_0405;DRB1_0701;DRB1_1401;DRB1_1404;DRB1_0101	0.728811692	0.738759819	0.562549511
orf1a polyprotein	4260	4284	VPANSTVLSFCAFAVDAAKAYKDYL	DRB1_1503;DQB1-0302_DQA1-0301;DRB1_0411;DRB1_0701;DRB1_1501;DRB3_0101;DQB1-0301_DQA1-0505	0.768850899	0.78502802	0.392295717
orf1ab polyprotein	4260	4284	VPANSTVLSFCAFAVDAAKAYKDYL	DRB1_1503;DQB1-0302_DQA1-0301;DRB1_0411;DRB1_0701;DRB1_1501;DRB3_0101;DQB1-0301_DQA1-0505	0.768850899	0.78502802	0.392295717
orf1a polyprotein	3949	3973	SSLPSYAAFATAQEAYEQAVANGDS	DRB1_0410;DQB1-0602_DQA1-0102;DQB1-0502_DQA1-0102;DQB1-0302_DQA1-0301;DRB1_0901;DRB1_0405;DQB1-0301_DQA1-0505;DQB1-0202_DQA1-0201;DRB1_0801	0.759057237	0.753181017	0.534980968
orf1ab polyprotein	3949	3973	SSLPSYAAFATAQEAYEQAVANGDS	DRB1_0410;DQB1-0602_DQA1-0102;DQB1-0502_DQA1-0102;DQB1-0302_DQA1-0301;DRB1_0901;DRB1_0405;DQB1-0301_DQA1-0505;DQB1-0202_DQA1-0201;DRB1_0801	0.759057237	0.753181017	0.534980968
orf1ab polyprotein	5916	5940	IPRRNVATLQAENVTGLFKDCSKVI	DPB1-0101_DPA1-0202;DQB1-0201_DQA1-0501;DQB1-0303_DQA1-0201;DPB1-0101_DPA1-0103;DQB1-0201_DQA1-0201;DQB1-0302_DQA1-0301;DQB1-0601_DQA1-0103;DRB1_1201;DRB3_0101;DQB1-0202_DQA1-0201	0.761676611	0.756294842	0.466654899
surface glycoprotein	793	817	PIKDFGGFNFSQILPDPSKPSKRSF	DPB1-0101_DPA1-0202;DQB1-0602_DQA1-0102;DQB1-0303_DQA1-0201;DQB1-0302_DQA1-0301;DRB1_0401;DRB1_0404;DRB1_0901;DRB1_0411;DRB1_1303;DRB1_0405;DRB3_0101;DRB1_1001	0.752154164	0.749478904	0.500287187
surface glycoprotein	794	818	IKDFGGFNFSQILPDPSKPSKRSFI	DPB1-0101_DPA1-0202;DQB1-0602_DQA1-0102;DQB1-0303_DQA1-0201;DQB1-0302_DQA1-0301;DRB1_0401;DRB1_0404;DRB1_0901;DRB1_0411;DRB1_1303;DRB1_0405;DRB3_0101;DRB1_1001	0.752154164	0.749478904	0.500287187
orf1ab polyprotein	645	669	GWEIVKFISTCACEIVGGQIVTCAK	DQB1-0201_DQA1-0501;DRB1_1503;DQB1-0603_DQA1-0103;DQB1-0303_DQA1-0201;DPB1-1301_DPA1-0201;DPB1-0101_DPA1-0103;DRB1_0404;DRB1_0701;DQB1-0301_DQA1-0505;DQB1-0202_DQA1-0201	0.805699336	0.805667677	0.294347065
orf1a polyprotein	645	669	GWEIVKFISTCACEIVGGQIVTCAK	DQB1-0201_DQA1-0501;DRB1_1503;DQB1-0603_DQA1-0103;DQB1-0303_DQA1-0201;DPB1-1301_DPA1-0201;DPB1-0101_DPA1-0103;DRB1_0404;DRB1_0701;DQB1-0301_DQA1-0505;DQB1-0202_DQA1-0201	0.805699336	0.805667677	0.294347065
orf1a polyprotein	648	672	IVKFISTCACEIVGGQIVTCAKEIK	DPB1-1001_DPA1-0201;DQB1-0201_DQA1-0501;DQB1-0303_DQA1-0201;DPB1-1301_DPA1-0201;DQB1-0302_DQA1-0301;DPB1-1701_DPA1-0201;DPB1-1101_DPA1-0201;DPB1-0901_DPA1-0201;DQB1-0301_DQA1-0505;DQB1-0202_DQA1-0201	0.784345368	0.784345368	0.421870919
orf1ab polyprotein	648	672	IVKFISTCACEIVGGQIVTCAKEIK	DPB1-1001_DPA1-0201;DQB1-0201_DQA1-0501;DQB1-0303_DQA1-0201;DPB1-1301_DPA1-0201;DQB1-0302_DQA1-0301;DPB1-1701_DPA1-0201;DPB1-1101_DPA1-0201;DPB1-0901_DPA1-0201;DQB1-0301_DQA1-0505;DQB1-0202_DQA1-0201	0.784345368	0.784345368	0.421870919
orf1ab polyprotein	5546	5570	GDYFVLTSHTVMPLSAPTLVPQEHY	DQB1-0201_DQA1-0501;DRB1_1301;DQB1-0303_DQA1-0201;DRB1_1601;DRB1_1202;DRB1_1201;DRB1_0102;DRB4_0103;DRB1_0101;DRB1_1001	0.765161478	0.773250503	0.419231269
envelope protein	49	73	VSLVKPSFYVYSRVKNLNSSRVPDL	DRB1_0901;DRB1_0407;DRB1_1101;DRB1_1202;DRB1_1201;DRB1_1302;DRB1_0102;DRB1_0701;DRB1_0101;DQB1-0301_DQA1-0505	0.693704449	0.694968377	0.643925242
envelope protein	48	72	NVSLVKPSFYVYSRVKNLNSSRVPD	DRB1_0901;DRB1_0407;DRB1_1101;DRB1_1202;DRB1_1201;DRB1_1302;DRB1_0102;DRB1_0701;DRB1_0101;DQB1-0301_DQA1-0505	0.693704449	0.694968377	0.643925242
surface glycoprotein	425	449	LPDDFTGCVIAWNSNNLDSKVGGNY	DRB1_1503;DRB1_0410;DRB1_1301;DQB1-0303_DQA1-0201;DQB1-0602_DQA1-0102;DRB5_0202;DQB1-0604_DQA1-0102;DRB1_0411;DQB1-0601_DQA1-0103;DQB1-0303_DQA1-0301;DRB1_0302;DRB1_1501;DQB1-0301_DQA1-0505;DRB1_1406	0.730909647	0.73292473	0.537507991
surface glycoprotein	424	448	KLPDDFTGCVIAWNSNNLDSKVGGN	DRB1_1503;DRB1_0410;DRB1_1301;DQB1-0303_DQA1-0201;DQB1-0602_DQA1-0102;DRB5_0202;DQB1-0604_DQA1-0102;DRB1_0411;DQB1-0601_DQA1-0103;DQB1-0303_DQA1-0301;DRB1_0302;DRB1_1501;DQB1-0301_DQA1-0505;DRB1_1406	0.730909647	0.73292473	0.537507991
surface glycoprotein	422	446	NYKLPDDFTGCVIAWNSNNLDSKVG	DRB1_1503;DRB1_0410;DRB1_1301;DQB1-0303_DQA1-0201;DQB1-0602_DQA1-0102;DRB5_0202;DQB1-0604_DQA1-0102;DRB1_0411;DQB1-0601_DQA1-0103;DQB1-0303_DQA1-0301;DRB1_0302;DRB1_1501;DQB1-0301_DQA1-0505;DRB1_1406	0.730909647	0.73292473	0.537507991
surface glycoprotein	423	447	YKLPDDFTGCVIAWNSNNLDSKVGG	DRB1_1503;DRB1_0410;DRB1_1301;DQB1-0303_DQA1-0201;DQB1-0602_DQA1-0102;DRB5_0202;DQB1-0604_DQA1-0102;DRB1_0411;DQB1-0601_DQA1-0103;DQB1-0303_DQA1-0301;DRB1_0302;DRB1_1501;DQB1-0301_DQA1-0505;DRB1_1406	0.730909647	0.73292473	0.537507991
orf1ab polyprotein	5507	5531	TGYRVTKNSKVQIGEYTFEKGDYGD	DRB1_1602;DQB1-0602_DQA1-0102;DRB1_1502;DRB1_1601;DRB3_0202;DRB1_0407;DRB1_0405;DRB1_0701;DRB1_1401;DRB1_0101	0.727553427	0.738525323	0.536201626
orf1ab polyprotein	1802	1826	SPFVMMSAPPAQYELKHGTFTCASE	DRB1_1602;DRB1_1502;DRB3_0202;DRB1_0407;DRB1_1101;DRB5_0102;DRB1_1303;DRB5_0101;DRB1_0405;DRB1_0804;DRB1_0102;DRB1_0101;DRB1_1001;DRB1_0802;DRB1_0801	0.766528751	0.744188301	0.49248624
orf1a polyprotein	1802	1826	SPFVMMSAPPAQYELKHGTFTCASE	DRB1_1602;DRB1_1502;DRB3_0202;DRB1_0407;DRB1_1101;DRB5_0102;DRB1_1303;DRB5_0101;DRB1_0405;DRB1_0804;DRB1_0102;DRB1_0101;DRB1_1001;DRB1_0802;DRB1_0801	0.766528751	0.744188301	0.49248624
orf1ab polyprotein	6353	6377	TPAFDKSAFVNLKQLPFFYYSDSPC	DPB1-0401_DPA1-0103;DRB1_1201;DRB1_1202;DPB1-0402_DPA1-0103	0.804092923	0.800331673	0.364029717
orf1ab polyprotein	6352	6376	HTPAFDKSAFVNLKQLPFFYYSDSP	DPB1-0401_DPA1-0103;DRB1_1201;DRB1_1202;DPB1-0402_DPA1-0103	0.804092923	0.800331673	0.364029717
orf1ab polyprotein	6349	6373	HAFHTPAFDKSAFVNLKQLPFFYYS	DPB1-0401_DPA1-0103;DRB1_1201;DRB1_1202;DPB1-0402_DPA1-0103	0.804092923	0.800331673	0.364029717
orf1ab polyprotein	6346	6370	VNKHAFHTPAFDKSAFVNLKQLPFF	DPB1-0401_DPA1-0103;DRB1_1201;DRB1_1202;DPB1-0402_DPA1-0103	0.804092923	0.800331673	0.364029717
orf1ab polyprotein	6348	6372	KHAFHTPAFDKSAFVNLKQLPFFYY	DPB1-0401_DPA1-0103;DRB1_1201;DRB1_1202;DPB1-0402_DPA1-0103	0.804092923	0.800331673	0.364029717
orf1ab polyprotein	6350	6374	AFHTPAFDKSAFVNLKQLPFFYYSD	DPB1-0401_DPA1-0103;DRB1_1201;DRB1_1202;DPB1-0402_DPA1-0103	0.804092923	0.800331673	0.364029717
orf1ab polyprotein	6347	6371	NKHAFHTPAFDKSAFVNLKQLPFFY	DPB1-0401_DPA1-0103;DRB1_1201;DRB1_1202;DPB1-0402_DPA1-0103	0.804092923	0.800331673	0.364029717
orf1ab polyprotein	6351	6375	FHTPAFDKSAFVNLKQLPFFYYSDS	DPB1-0401_DPA1-0103;DRB1_1201;DRB1_1202;DPB1-0402_DPA1-0103	0.804092923	0.800331673	0.364029717
membrane glycoprotein	163	187	DLPKEITVATSRTLSYYKLGASQRV	DRB1_1503;DRB1_1301;DQB1-0303_DQA1-0201;DQB1-0502_DQA1-0102;DRB1_0403;DRB1_0404;DRB1_0901;DRB1_0406;DRB1_0102;DRB1_1501;DRB1_1406;DQB1-0301_DQA1-0505;DQB1-0202_DQA1-0201	0.728730786	0.729502774	0.550248509
orf1ab polyprotein	646	670	WEIVKFISTCACEIVGGQIVTCAKE	DQB1-0201_DQA1-0501;DQB1-0603_DQA1-0103;DQB1-0303_DQA1-0201;DPB1-1301_DPA1-0201;DPB1-0101_DPA1-0103;DRB1_0404;DRB1_0701;DQB1-0301_DQA1-0505;DQB1-0202_DQA1-0201	0.797250835	0.805578243	0.293461196
orf1a polyprotein	646	670	WEIVKFISTCACEIVGGQIVTCAKE	DQB1-0201_DQA1-0501;DQB1-0603_DQA1-0103;DQB1-0303_DQA1-0201;DPB1-1301_DPA1-0201;DPB1-0101_DPA1-0103;DRB1_0404;DRB1_0701;DQB1-0301_DQA1-0505;DQB1-0202_DQA1-0201	0.797250835	0.805578243	0.293461196
surface glycoprotein	1051	1075	SFPQSAPHGVVFLHVTYVPAQEKNF	DPB1-0401_DPA1-0103;DRB1_1102;DQB1-0502_DQA1-0102;DQB1-0302_DQA1-0301;DRB1_0403;DRB5_0202;DPB1-1101_DPA1-0201;DRB1_0402;DRB1_1404	0.785849277	0.780433837	0.408274685
orf1ab polyprotein	5550	5574	VLTSHTVMPLSAPTLVPQEHYVRIT	DQB1-0201_DQA1-0501;DQB1-0303_DQA1-0201;DQB1-0302_DQA1-0301;DRB1_1201;DRB1_0102;DRB4_0103;DRB1_0101	0.777492315	0.784349973	0.332479888
nucleocapsid phosphoprotein	214	238	GGDAALALLLLDRLNQLESKMSGKG	DRB1_1102;DRB1_1301;DRB1_1101;DRB3_0301;DRB1_1405;DRB1_0804;DRB4_0103;DRB1_1104;DRB3_0101;DRB1_1406	0.825313968	0.821672229	0.193254724
surface glycoprotein	421	445	YNYKLPDDFTGCVIAWNSNNLDSKV	DRB1_1503;DRB1_0410;DRB1_1301;DQB1-0303_DQA1-0201;DQB1-0602_DQA1-0102;DRB5_0202;DQB1-0604_DQA1-0102;DRB1_0411;DQB1-0601_DQA1-0103;DQB1-0303_DQA1-0301;DRB1_1501;DQB1-0301_DQA1-0505	0.720770464	0.732843838	0.534574125
orf1a polyprotein	2947	2971	SLRPDTRYVLMDGSIIQFPNTYLEG	DRB1_1602;DRB1_1502;DRB1_0301;DRB1_1601;DRB1_0401;DRB5_0102;DRB1_0404;DRB1_1501;DRB1_0101;DRB1_1001	0.68056781	0.778189897	0.524217347
orf1ab polyprotein	2947	2971	SLRPDTRYVLMDGSIIQFPNTYLEG	DRB1_1602;DRB1_1502;DRB1_0301;DRB1_1601;DRB1_0401;DRB5_0102;DRB1_0404;DRB1_1501;DRB1_0101;DRB1_1001	0.68056781	0.778189897	0.524217347
orf1a polyprotein	3946	3970	SEFSSLPSYAAFATAQEAYEQAVAN	DRB1_0410;DQB1-0602_DQA1-0102;DQB1-0502_DQA1-0102;DQB1-0302_DQA1-0301;DRB1_0404;DRB1_0405;DQB1-0301_DQA1-0505;DQB1-0202_DQA1-0201;DRB1_0801	0.767009836	0.767373316	0.426019209
orf1ab polyprotein	3946	3970	SEFSSLPSYAAFATAQEAYEQAVAN	DRB1_0410;DQB1-0602_DQA1-0102;DQB1-0502_DQA1-0102;DQB1-0302_DQA1-0301;DRB1_0404;DRB1_0405;DQB1-0301_DQA1-0505;DQB1-0202_DQA1-0201;DRB1_0801	0.767009836	0.767373316	0.426019209
orf1a polyprotein	3945	3969	ASEFSSLPSYAAFATAQEAYEQAVA	DRB1_0410;DQB1-0602_DQA1-0102;DQB1-0502_DQA1-0102;DQB1-0302_DQA1-0301;DRB1_0404;DRB1_0405;DQB1-0301_DQA1-0505;DQB1-0202_DQA1-0201;DRB1_0801	0.767009836	0.767373316	0.426019209
orf1ab polyprotein	3945	3969	ASEFSSLPSYAAFATAQEAYEQAVA	DRB1_0410;DQB1-0602_DQA1-0102;DQB1-0502_DQA1-0102;DQB1-0302_DQA1-0301;DRB1_0404;DRB1_0405;DQB1-0301_DQA1-0505;DQB1-0202_DQA1-0201;DRB1_0801	0.767009836	0.767373316	0.426019209
orf1ab polyprotein	4234	4258	LNNLNRGMVLGSLAATVRLQAGNAT	DRB1_1102;DRB1_1301;DQB1-0602_DQA1-0102;DRB1_1101;DRB1_1405;DRB4_0103;DRB1_1104;DQB1-0301_DQA1-0505	0.79342261	0.795522563	0.245563086
orf1a polyprotein	4235	4259	NNLNRGMVLGSLAATVRLQAGNATE	DRB1_1102;DRB1_1301;DQB1-0602_DQA1-0102;DRB1_1101;DRB1_1405;DRB4_0103;DRB1_1104;DQB1-0301_DQA1-0505	0.79342261	0.795522563	0.245563086
orf1a polyprotein	4237	4261	LNRGMVLGSLAATVRLQAGNATEVP	DRB1_1102;DRB1_1301;DQB1-0602_DQA1-0102;DRB1_1101;DRB1_1405;DRB4_0103;DRB1_1104;DQB1-0301_DQA1-0505	0.79342261	0.795522563	0.245563086
orf1a polyprotein	4234	4258	LNNLNRGMVLGSLAATVRLQAGNAT	DRB1_1102;DRB1_1301;DQB1-0602_DQA1-0102;DRB1_1101;DRB1_1405;DRB4_0103;DRB1_1104;DQB1-0301_DQA1-0505	0.79342261	0.795522563	0.245563086
orf1ab polyprotein	4238	4262	NRGMVLGSLAATVRLQAGNATEVPA	DRB1_1102;DRB1_1301;DQB1-0602_DQA1-0102;DRB1_1101;DRB1_1405;DRB4_0103;DRB1_1104;DQB1-0301_DQA1-0505	0.79342261	0.795522563	0.245563086
orf1ab polyprotein	4236	4260	NLNRGMVLGSLAATVRLQAGNATEV	DRB1_1102;DRB1_1301;DQB1-0602_DQA1-0102;DRB1_1101;DRB1_1405;DRB4_0103;DRB1_1104;DQB1-0301_DQA1-0505	0.79342261	0.795522563	0.245563086
orf1a polyprotein	4238	4262	NRGMVLGSLAATVRLQAGNATEVPA	DRB1_1102;DRB1_1301;DQB1-0602_DQA1-0102;DRB1_1101;DRB1_1405;DRB4_0103;DRB1_1104;DQB1-0301_DQA1-0505	0.79342261	0.795522563	0.245563086
orf1ab polyprotein	4235	4259	NNLNRGMVLGSLAATVRLQAGNATE	DRB1_1102;DRB1_1301;DQB1-0602_DQA1-0102;DRB1_1101;DRB1_1405;DRB4_0103;DRB1_1104;DQB1-0301_DQA1-0505	0.79342261	0.795522563	0.245563086
orf1ab polyprotein	4237	4261	LNRGMVLGSLAATVRLQAGNATEVP	DRB1_1102;DRB1_1301;DQB1-0602_DQA1-0102;DRB1_1101;DRB1_1405;DRB4_0103;DRB1_1104;DQB1-0301_DQA1-0505	0.79342261	0.795522563	0.245563086
orf1a polyprotein	4236	4260	NLNRGMVLGSLAATVRLQAGNATEV	DRB1_1102;DRB1_1301;DQB1-0602_DQA1-0102;DRB1_1101;DRB1_1405;DRB4_0103;DRB1_1104;DQB1-0301_DQA1-0505	0.79342261	0.795522563	0.245563086
membrane glycoprotein	157	181	GRCDIKDLPKEITVATSRTLSYYKL	DRB1_1503;DRB1_1602;DRB1_0403;DRB1_0404;DRB1_1601;DRB5_0102;DRB1_0901;DRB1_0406;DRB1_0102;DRB1_0402;DRB1_1501;DRB1_0101;DQB1-0301_DQA1-0505;DQB1-0202_DQA1-0201	0.729573163	0.742372602	0.505706636
surface glycoprotein	361	385	CVADYSVLYNSASFSTFKCYGVSPT	DPB1-0401_DPA1-0103;DRB1_1502;DRB3_0202;DRB3_0201;DRB3_0301;DRB1_0802	0.808518561	0.800983532	0.244909405
surface glycoprotein	359	383	SNCVADYSVLYNSASFSTFKCYGVS	DPB1-0401_DPA1-0103;DRB1_1502;DRB3_0202;DRB3_0201;DRB3_0301;DRB1_0802	0.808518561	0.800983532	0.244909405
surface glycoprotein	360	384	NCVADYSVLYNSASFSTFKCYGVSP	DPB1-0401_DPA1-0103;DRB1_1502;DRB3_0202;DRB3_0201;DRB3_0301;DRB1_0802	0.808518561	0.800983532	0.244909405
orf1a polyprotein	1636	1660	HTTDPSFLGRYMSALNHTKKWKYPQ	DPB1-0202_DPA1-0103;DRB1_0901;DPB1-0501_DPA1-0202;DRB5_0102;DRB5_0101;DPB1-1101_DPA1-0201;DRB1_1401;DPB1-0201_DPA1-0103	0.563366322	0.556662973	0.862626287
orf1ab polyprotein	1636	1660	HTTDPSFLGRYMSALNHTKKWKYPQ	DPB1-0202_DPA1-0103;DRB1_0901;DPB1-0501_DPA1-0202;DRB5_0102;DRB5_0101;DPB1-1101_DPA1-0201;DRB1_1401;DPB1-0201_DPA1-0103	0.563366322	0.556662973	0.862626287
orf1ab polyprotein	1638	1662	TDPSFLGRYMSALNHTKKWKYPQVN	DPB1-0202_DPA1-0103;DRB1_0901;DPB1-0501_DPA1-0202;DRB5_0102;DRB5_0101;DPB1-1101_DPA1-0201;DRB1_1401;DPB1-0201_DPA1-0103	0.563366322	0.556662973	0.862626287
orf1a polyprotein	1637	1661	TTDPSFLGRYMSALNHTKKWKYPQV	DPB1-0202_DPA1-0103;DRB1_0901;DPB1-0501_DPA1-0202;DRB5_0102;DRB5_0101;DPB1-1101_DPA1-0201;DRB1_1401;DPB1-0201_DPA1-0103	0.563366322	0.556662973	0.862626287
orf1a polyprotein	1638	1662	TDPSFLGRYMSALNHTKKWKYPQVN	DPB1-0202_DPA1-0103;DRB1_0901;DPB1-0501_DPA1-0202;DRB5_0102;DRB5_0101;DPB1-1101_DPA1-0201;DRB1_1401;DPB1-0201_DPA1-0103	0.563366322	0.556662973	0.862626287
orf1ab polyprotein	1637	1661	TTDPSFLGRYMSALNHTKKWKYPQV	DPB1-0202_DPA1-0103;DRB1_0901;DPB1-0501_DPA1-0202;DRB5_0102;DRB5_0101;DPB1-1101_DPA1-0201;DRB1_1401;DPB1-0201_DPA1-0103	0.563366322	0.556662973	0.862626287
orf1ab polyprotein	638	662	GVEFLRDGWEIVKFISTCACEIVGG	DQB1-0201_DQA1-0501;DRB1_1503;DQB1-0303_DQA1-0201;DPB1-1301_DPA1-0201;DPB1-0101_DPA1-0103;DRB1_0403;DRB1_0404;DRB1_0406;DPB1-0402_DPA1-0103;DRB1_0402;DRB1_1501;DQB1-0202_DQA1-0201	0.741499152	0.749513729	0.463594315
orf1a polyprotein	637	661	EGVEFLRDGWEIVKFISTCACEIVG	DQB1-0201_DQA1-0501;DRB1_1503;DQB1-0303_DQA1-0201;DPB1-1301_DPA1-0201;DPB1-0101_DPA1-0103;DRB1_0403;DRB1_0404;DRB1_0406;DPB1-0402_DPA1-0103;DRB1_0402;DRB1_1501;DQB1-0202_DQA1-0201	0.741499152	0.749513729	0.463594315
orf1ab polyprotein	637	661	EGVEFLRDGWEIVKFISTCACEIVG	DQB1-0201_DQA1-0501;DRB1_1503;DQB1-0303_DQA1-0201;DPB1-1301_DPA1-0201;DPB1-0101_DPA1-0103;DRB1_0403;DRB1_0404;DRB1_0406;DPB1-0402_DPA1-0103;DRB1_0402;DRB1_1501;DQB1-0202_DQA1-0201	0.741499152	0.749513729	0.463594315
orf1a polyprotein	638	662	GVEFLRDGWEIVKFISTCACEIVGG	DQB1-0201_DQA1-0501;DRB1_1503;DQB1-0303_DQA1-0201;DPB1-1301_DPA1-0201;DPB1-0101_DPA1-0103;DRB1_0403;DRB1_0404;DRB1_0406;DPB1-0402_DPA1-0103;DRB1_0402;DRB1_1501;DQB1-0202_DQA1-0201	0.741499152	0.749513729	0.463594315
orf1ab polyprotein	3296	3320	DDVVYCPRHVICTSEDMLNPNYEDL	DPB1-1001_DPA1-0201;DQB1-0201_DQA1-0501;DQB1-0401_DQA1-0301;DRB1_1503;DRB1_1301;DPB1-0101_DPA1-0103;DQB1-0201_DQA1-0201;DQB1-0302_DQA1-0301;DRB1_0403;DPB1-1101_DPA1-0201;DRB1_1401;DRB1_1406;DQB1-0603_DQA1-0103;DQB1-0202_DQA1-0201	0.738518634	0.728788697	0.50565503
orf1a polyprotein	3296	3320	DDVVYCPRHVICTSEDMLNPNYEDL	DPB1-1001_DPA1-0201;DQB1-0201_DQA1-0501;DQB1-0401_DQA1-0301;DRB1_1503;DRB1_1301;DPB1-0101_DPA1-0103;DQB1-0201_DQA1-0201;DQB1-0302_DQA1-0301;DRB1_0403;DPB1-1101_DPA1-0201;DRB1_1401;DRB1_1406;DQB1-0603_DQA1-0103;DQB1-0202_DQA1-0201	0.738518634	0.728788697	0.50565503
orf1ab polyprotein	6442	6466	YNLWNTFTRLQSLENVAFNVVNKGH	DQB1-0602_DQA1-0102;DRB1_1601;DRB5_0102;DRB1_1202;DPB1-0201_DPA1-0103;DRB1_1201;DPB1-0402_DPA1-0103;DRB1_0101;DRB1_1001	0.676008611	0.684349357	0.644374257
orf1ab polyprotein	657	681	CEIVGGQIVTCAKEIKESVQTFFKL	DPB1-1001_DPA1-0201;DRB1_1102;DRB1_1301;DRB1_0301;DQB1-0302_DQA1-0301;DQB1-0301_DQA1-0303;DPB1-1701_DPA1-0201;DRB1_0406;DRB1_1405;DRB1_0302;DPB1-1101_DPA1-0201;DRB1_0701;DPB1-0901_DPA1-0201;DRB1_1406	0.705053398	0.722213972	0.562092033
orf1ab polyprotein	658	682	EIVGGQIVTCAKEIKESVQTFFKLV	DPB1-1001_DPA1-0201;DRB1_1102;DRB1_1301;DRB1_0301;DQB1-0302_DQA1-0301;DQB1-0301_DQA1-0303;DPB1-1701_DPA1-0201;DRB1_0406;DRB1_1405;DRB1_0302;DPB1-1101_DPA1-0201;DRB1_0701;DPB1-0901_DPA1-0201;DRB1_1406	0.705053398	0.722213972	0.562092033
orf1a polyprotein	657	681	CEIVGGQIVTCAKEIKESVQTFFKL	DPB1-1001_DPA1-0201;DRB1_1102;DRB1_1301;DRB1_0301;DQB1-0302_DQA1-0301;DQB1-0301_DQA1-0303;DPB1-1701_DPA1-0201;DRB1_0406;DRB1_1405;DRB1_0302;DPB1-1101_DPA1-0201;DRB1_0701;DPB1-0901_DPA1-0201;DRB1_1406	0.705053398	0.722213972	0.562092033
orf1a polyprotein	658	682	EIVGGQIVTCAKEIKESVQTFFKLV	DPB1-1001_DPA1-0201;DRB1_1102;DRB1_1301;DRB1_0301;DQB1-0302_DQA1-0301;DQB1-0301_DQA1-0303;DPB1-1701_DPA1-0201;DRB1_0406;DRB1_1405;DRB1_0302;DPB1-1101_DPA1-0201;DRB1_0701;DPB1-0901_DPA1-0201;DRB1_1406	0.705053398	0.722213972	0.562092033
orf1a polyprotein	2710	2734	ALIWNVKDFMSLSEQLRKQIRSAAK	DQB1-0201_DQA1-0501;DPB1-0202_DPA1-0103;DQB1-0302_DQA1-0301;DQB1-0201_DQA1-0201;DRB5_0102;DRB5_0101;DRB1_1402;DPB1-1101_DPA1-0201;DRB1_1406;DQB1-0603_DQA1-0103;DQB1-0202_DQA1-0201	0.774175883	0.770081783	0.349583542
orf1ab polyprotein	2710	2734	ALIWNVKDFMSLSEQLRKQIRSAAK	DQB1-0201_DQA1-0501;DPB1-0202_DPA1-0103;DQB1-0302_DQA1-0301;DQB1-0201_DQA1-0201;DRB5_0102;DRB5_0101;DRB1_1402;DPB1-1101_DPA1-0201;DRB1_1406;DQB1-0603_DQA1-0103;DQB1-0202_DQA1-0201	0.774175883	0.770081783	0.349583542
orf1ab polyprotein	2899	2923	PSKLIEYTDFATSACVLAAECTIFK	DPB1-0401_DPA1-0103;DQB1-0602_DQA1-0102;DQB1-0303_DQA1-0201;DQB1-0301_DQA1-0601	0.783965459	0.783965459	0.346429617
orf1a polyprotein	2899	2923	PSKLIEYTDFATSACVLAAECTIFK	DPB1-0401_DPA1-0103;DQB1-0602_DQA1-0102;DQB1-0303_DQA1-0201;DQB1-0301_DQA1-0601	0.783965459	0.783965459	0.346429617
orf1ab polyprotein	480	504	FSASTSAFVETVKGLDYKAFKQIVE	DQB1-0602_DQA1-0102;DPB1-0202_DPA1-0103;DRB1_1202;DRB1_1101;DRB1_1303;DQB1-0601_DQA1-0103;DRB1_1201;DRB1_0803;DPB1-0201_DPA1-0103;DQB1-0202_DQA1-0201;DRB1_0801	0.678701869	0.670560755	0.665394939
orf1a polyprotein	479	503	SFSASTSAFVETVKGLDYKAFKQIV	DQB1-0602_DQA1-0102;DPB1-0202_DPA1-0103;DRB1_1202;DRB1_1101;DRB1_1303;DQB1-0601_DQA1-0103;DRB1_1201;DRB1_0803;DPB1-0201_DPA1-0103;DQB1-0202_DQA1-0201;DRB1_0801	0.678701869	0.670560755	0.665394939
orf1ab polyprotein	479	503	SFSASTSAFVETVKGLDYKAFKQIV	DQB1-0602_DQA1-0102;DPB1-0202_DPA1-0103;DRB1_1202;DRB1_1101;DRB1_1303;DQB1-0601_DQA1-0103;DRB1_1201;DRB1_0803;DPB1-0201_DPA1-0103;DQB1-0202_DQA1-0201;DRB1_0801	0.678701869	0.670560755	0.665394939
orf1a polyprotein	480	504	FSASTSAFVETVKGLDYKAFKQIVE	DQB1-0602_DQA1-0102;DPB1-0202_DPA1-0103;DRB1_1202;DRB1_1101;DRB1_1303;DQB1-0601_DQA1-0103;DRB1_1201;DRB1_0803;DPB1-0201_DPA1-0103;DQB1-0202_DQA1-0201;DRB1_0801	0.678701869	0.670560755	0.665394939
orf1ab polyprotein	6437	6461	KQFDTYNLWNTFTRLQSLENVAFNV	DRB1_1102;DQB1-0602_DQA1-0102;DRB1_1601;DRB5_0102;DRB1_1101;DRB1_1202;DRB1_1302;DRB1_1201;DRB5_0101;DRB1_0804;DRB1_1104;DRB1_0101;DRB1_1001;DRB1_0802	0.737034579	0.72598718	0.502972011
orf1ab polyprotein	6438	6462	QFDTYNLWNTFTRLQSLENVAFNVV	DRB1_1102;DQB1-0602_DQA1-0102;DRB1_1601;DRB5_0102;DRB1_1101;DRB1_1202;DRB1_1302;DRB1_1201;DRB5_0101;DRB1_0804;DRB1_1104;DRB1_0101;DRB1_1001;DRB1_0802	0.737034579	0.72598718	0.502972011
orf1ab polyprotein	6439	6463	FDTYNLWNTFTRLQSLENVAFNVVN	DRB1_1102;DQB1-0602_DQA1-0102;DRB1_1601;DRB5_0102;DRB1_1101;DRB1_1202;DRB1_1302;DRB1_1201;DRB5_0101;DRB1_0804;DRB1_1104;DRB1_0101;DRB1_1001;DRB1_0802	0.737034579	0.72598718	0.502972011
orf1a polyprotein	4057	4081	VPLNIIPLTTAAKLMVVIPDYNTYK	DPB1-1401_DPA1-0201;DPB1-0101_DPA1-0201;DQB1-0602_DQA1-0102;DQB1-0302_DQA1-0301;DRB1_0404;DQB1-0601_DQA1-0103;DRB1_0406;DRB1_1401;DRB4_0103	0.765733866	0.767321664	0.372691663
orf1ab polyprotein	4057	4081	VPLNIIPLTTAAKLMVVIPDYNTYK	DPB1-1401_DPA1-0201;DPB1-0101_DPA1-0201;DQB1-0602_DQA1-0102;DQB1-0302_DQA1-0301;DRB1_0404;DQB1-0601_DQA1-0103;DRB1_0406;DRB1_1401;DRB4_0103	0.765733866	0.767321664	0.372691663
orf1ab polyprotein	5771	5795	EIVDTVSALVYDNKLKAHKDKSAQC	DRB1_0301;DQB1-0302_DQA1-0301;DQB1-0201_DQA1-0201;DRB1_1101;DQB1-0501_DQA1-0101;DRB1_1303;DQB1-0601_DQA1-0103;DRB1_0302;DRB1_1104;DQB1-0301_DQA1-0505	0.720134012	0.729994652	0.517460544
orf1ab polyprotein	5772	5796	IVDTVSALVYDNKLKAHKDKSAQCF	DRB1_0301;DQB1-0302_DQA1-0301;DQB1-0201_DQA1-0201;DRB1_1101;DQB1-0501_DQA1-0101;DRB1_1303;DQB1-0601_DQA1-0103;DRB1_0302;DRB1_1104;DQB1-0301_DQA1-0505	0.720134012	0.729994652	0.517460544
orf1ab polyprotein	5770	5794	AEIVDTVSALVYDNKLKAHKDKSAQ	DRB1_0301;DQB1-0302_DQA1-0301;DQB1-0201_DQA1-0201;DRB1_1101;DQB1-0501_DQA1-0101;DRB1_1303;DQB1-0601_DQA1-0103;DRB1_0302;DRB1_1104;DQB1-0301_DQA1-0505	0.720134012	0.729994652	0.517460544
membrane glycoprotein	1	25	MADSNGTITVEELKKLLEQWNLVIG	DRB1_1102;DRB1_1301;DQB1-0302_DQA1-0301;DQB1-0201_DQA1-0201;DQB1-0301_DQA1-0303;DRB1_1101;DRB1_0803;DPB1-0402_DPA1-0103;DRB1_0804;DRB1_1104;DRB1_1406;DQB1-0202_DQA1-0201;DRB1_0801	0.727070449	0.724256312	0.513104662
orf1ab polyprotein	6749	6773	LLLDDFVEIIKSQDLSVVSKVVKVT	DRB1_1602;DRB1_1601;DRB1_1101;DRB1_1303;DRB1_0406;DRB1_1402;DRB1_0803;DRB1_0701;DPB1-0402_DPA1-0103;DRB1_1501;DRB1_0802;DRB1_0801	0.681477706	0.70366693	0.603192983
orf1ab polyprotein	6750	6774	LLDDFVEIIKSQDLSVVSKVVKVTI	DRB1_1602;DRB1_1601;DRB1_1101;DRB1_1303;DRB1_0406;DRB1_1402;DRB1_0803;DRB1_0701;DPB1-0402_DPA1-0103;DRB1_1501;DRB1_0802;DRB1_0801	0.681477706	0.70366693	0.603192983
orf1ab polyprotein	6748	6772	DLLLDDFVEIIKSQDLSVVSKVVKV	DRB1_1602;DRB1_1601;DRB1_1101;DRB1_1303;DRB1_0406;DRB1_1402;DRB1_0803;DRB1_0701;DPB1-0402_DPA1-0103;DRB1_1501;DRB1_0802;DRB1_0801	0.681477706	0.70366693	0.603192983
orf1a polyprotein	2878	2902	NGDFLHFLPRVFSAVGNICYTPSKL	DQB1-0201_DQA1-0501;DRB1_1102;DRB1_0403;DRB1_0404;DRB1_1101;DRB1_0102;DRB1_0804;DRB1_1401;DRB1_1104;DPB1-0201_DPA1-0103;DQB1-0301_DQA1-0505;DRB1_1406	0.716832066	0.703801464	0.565470938
orf1ab polyprotein	2878	2902	NGDFLHFLPRVFSAVGNICYTPSKL	DQB1-0201_DQA1-0501;DRB1_1102;DRB1_0403;DRB1_0404;DRB1_1101;DRB1_0102;DRB1_0804;DRB1_1401;DRB1_1104;DPB1-0201_DPA1-0103;DQB1-0301_DQA1-0505;DRB1_1406	0.716832066	0.703801464	0.565470938
orf1ab polyprotein	1235	1259	CVEEVTTTLEETKFLTENLLLYIDI	DPB1-0401_DPA1-0103;DPB1-0101_DPA1-0103;DQB1-0302_DQA1-0301;DRB1_0302;DQB1-0202_DQA1-0201	0.805418406	0.801440246	0.204567903
orf1a polyprotein	1235	1259	CVEEVTTTLEETKFLTENLLLYIDI	DPB1-0401_DPA1-0103;DPB1-0101_DPA1-0103;DQB1-0302_DQA1-0301;DRB1_0302;DQB1-0202_DQA1-0201	0.805418406	0.801440246	0.204567903
orf1a polyprotein	1234	1258	ACVEEVTTTLEETKFLTENLLLYID	DPB1-0401_DPA1-0103;DPB1-0101_DPA1-0103;DQB1-0302_DQA1-0301;DRB1_0302;DQB1-0202_DQA1-0201	0.805418406	0.801440246	0.204567903
orf1ab polyprotein	1234	1258	ACVEEVTTTLEETKFLTENLLLYID	DPB1-0401_DPA1-0103;DPB1-0101_DPA1-0103;DQB1-0302_DQA1-0301;DRB1_0302;DQB1-0202_DQA1-0201	0.805418406	0.801440246	0.204567903
orf1ab polyprotein	6440	6464	DTYNLWNTFTRLQSLENVAFNVVNK	DQB1-0602_DQA1-0102;DRB1_1601;DRB5_0102;DRB1_1101;DRB1_1202;DRB1_1201;DRB1_1302;DRB5_0101;DRB1_0804;DRB1_1104;DRB1_0101;DRB1_1001;DRB1_0802	0.730909907	0.724865991	0.502972011
orf1ab polyprotein	1233	1257	KACVEEVTTTLEETKFLTENLLLYI	DPB1-0401_DPA1-0103;DPB1-0101_DPA1-0103;DQB1-0302_DQA1-0301;DRB1_0411;DQB1-0202_DQA1-0201	0.803100058	0.801416416	0.204567903
orf1a polyprotein	1232	1256	IKACVEEVTTTLEETKFLTENLLLY	DPB1-0401_DPA1-0103;DPB1-0101_DPA1-0103;DQB1-0302_DQA1-0301;DRB1_0411;DQB1-0202_DQA1-0201	0.803100058	0.801416416	0.204567903
orf1a polyprotein	1233	1257	KACVEEVTTTLEETKFLTENLLLYI	DPB1-0401_DPA1-0103;DPB1-0101_DPA1-0103;DQB1-0302_DQA1-0301;DRB1_0411;DQB1-0202_DQA1-0201	0.803100058	0.801416416	0.204567903
orf1ab polyprotein	1232	1256	IKACVEEVTTTLEETKFLTENLLLY	DPB1-0401_DPA1-0103;DPB1-0101_DPA1-0103;DQB1-0302_DQA1-0301;DRB1_0411;DQB1-0202_DQA1-0201	0.803100058	0.801416416	0.204567903
orf1ab polyprotein	647	671	EIVKFISTCACEIVGGQIVTCAKEI	DPB1-1001_DPA1-0201;DQB1-0201_DQA1-0501;DQB1-0303_DQA1-0201;DPB1-1301_DPA1-0201;DPB1-0101_DPA1-0103;DPB1-1701_DPA1-0201;DRB1_0701;DPB1-0901_DPA1-0201;DQB1-0301_DQA1-0505;DQB1-0202_DQA1-0201	0.752607293	0.760955621	0.43086325
orf1a polyprotein	647	671	EIVKFISTCACEIVGGQIVTCAKEI	DPB1-1001_DPA1-0201;DQB1-0201_DQA1-0501;DQB1-0303_DQA1-0201;DPB1-1301_DPA1-0201;DPB1-0101_DPA1-0103;DPB1-1701_DPA1-0201;DRB1_0701;DPB1-0901_DPA1-0201;DQB1-0301_DQA1-0505;DQB1-0202_DQA1-0201	0.752607293	0.760955621	0.43086325
orf1ab polyprotein	6436	6460	YKQFDTYNLWNTFTRLQSLENVAFN	DRB1_1102;DQB1-0602_DQA1-0102;DRB5_0102;DRB1_1101;DRB1_1202;DRB1_1302;DRB1_1201;DRB5_0101;DRB1_0804;DRB1_1104;DRB1_0101;DRB1_1001;DRB1_0802	0.731132067	0.718113211	0.50259135
orf1ab polyprotein	2626	2650	LDNVLSTFISAARQGFVDSDVETKD	DQB1-0303_DQA1-0201;DQB1-0502_DQA1-0102;DQB1-0602_DQA1-0102;DRB1_0901;DPB1-0501_DPA1-0202;DRB1_1101;DQB1-0501_DQA1-0101;DRB1_1402	0.597437985	0.584084588	0.802521304
orf1a polyprotein	2626	2650	LDNVLSTFISAARQGFVDSDVETKD	DQB1-0303_DQA1-0201;DQB1-0502_DQA1-0102;DQB1-0602_DQA1-0102;DRB1_0901;DPB1-0501_DPA1-0202;DRB1_1101;DQB1-0501_DQA1-0101;DRB1_1402	0.597437985	0.584084588	0.802521304
orf1ab polyprotein	2625	2649	SLDNVLSTFISAARQGFVDSDVETK	DQB1-0303_DQA1-0201;DQB1-0502_DQA1-0102;DQB1-0602_DQA1-0102;DRB1_0901;DPB1-0501_DPA1-0202;DRB1_1101;DQB1-0501_DQA1-0101;DRB1_1402	0.597437985	0.584084588	0.802521304
orf1a polyprotein	2625	2649	SLDNVLSTFISAARQGFVDSDVETK	DQB1-0303_DQA1-0201;DQB1-0502_DQA1-0102;DQB1-0602_DQA1-0102;DRB1_0901;DPB1-0501_DPA1-0202;DRB1_1101;DQB1-0501_DQA1-0101;DRB1_1402	0.597437985	0.584084588	0.802521304
orf1a polyprotein	4275	4299	DAAKAYKDYLASGGQPITNCVKMLC	DPB1-0101_DPA1-0201;DPB1-0202_DPA1-0103;DRB1_0901;DRB1_1601;DPB1-0501_DPA1-0201;DRB1_0701;DRB1_1501;DRB1_0101;DQB1-0301_DQA1-0505	0.677411132	0.735531689	0.547881683
orf1ab polyprotein	4275	4299	DAAKAYKDYLASGGQPITNCVKMLC	DPB1-0101_DPA1-0201;DPB1-0202_DPA1-0103;DRB1_0901;DRB1_1601;DPB1-0501_DPA1-0201;DRB1_0701;DRB1_1501;DRB1_0101;DQB1-0301_DQA1-0505	0.677411132	0.735531689	0.547881683
surface glycoprotein	331	355	NITNLCPFGEVFNATRFASVYAWNR	DPB1-0401_DPA1-0103;DRB1_1104;DPB1-0402_DPA1-0103;DRB1_0804	0.808403075	0.807599977	0.219919782
orf1a polyprotein	3557	3581	FDVVRQCSGVTFQSAVKRTIKGTHH	DRB1_0901;DRB5_0102;DRB1_1202;DRB5_0202;DRB1_1302;DRB5_0101;DPB1-0402_DPA1-0103;DPB1-0201_DPA1-0103	0.672974861	0.6602752	0.661900989
orf1a polyprotein	3556	3580	PFDVVRQCSGVTFQSAVKRTIKGTH	DRB1_0901;DRB5_0102;DRB1_1202;DRB5_0202;DRB1_1302;DRB5_0101;DPB1-0402_DPA1-0103;DPB1-0201_DPA1-0103	0.672974861	0.6602752	0.661900989
orf1ab polyprotein	3556	3580	PFDVVRQCSGVTFQSAVKRTIKGTH	DRB1_0901;DRB5_0102;DRB1_1202;DRB5_0202;DRB1_1302;DRB5_0101;DPB1-0402_DPA1-0103;DPB1-0201_DPA1-0103	0.672974861	0.6602752	0.661900989
orf1ab polyprotein	3557	3581	FDVVRQCSGVTFQSAVKRTIKGTHH	DRB1_0901;DRB5_0102;DRB1_1202;DRB5_0202;DRB1_1302;DRB5_0101;DPB1-0402_DPA1-0103;DPB1-0201_DPA1-0103	0.672974861	0.6602752	0.661900989
orf1ab polyprotein	4762	4786	ELLVYAADPAMHAASGNLLLDKRTT	DPB1-0101_DPA1-0201;DRB1_0901;DRB1_0302;DRB1_0102;DRB1_1401;DRB1_0701;DRB1_0101;DQB1-0301_DQA1-0505;DRB3_0101	0.739012363	0.7496431	0.415646775
orf1ab polyprotein	1945	1969	TGYKKPASRELKVTFFPDLNGDVVA	DPB1-0401_DPA1-0103;DPB1-0101_DPA1-0201;DQB1-0502_DQA1-0102;DQB1-0501_DQA1-0101;DRB1_0402	0.7913369	0.791305113	0.280118782
orf1ab polyprotein	1946	1970	GYKKPASRELKVTFFPDLNGDVVAI	DPB1-0401_DPA1-0103;DPB1-0101_DPA1-0201;DQB1-0502_DQA1-0102;DQB1-0501_DQA1-0101;DRB1_0402	0.7913369	0.791305113	0.280118782
orf1a polyprotein	1946	1970	GYKKPASRELKVTFFPDLNGDVVAI	DPB1-0401_DPA1-0103;DPB1-0101_DPA1-0201;DQB1-0502_DQA1-0102;DQB1-0501_DQA1-0101;DRB1_0402	0.7913369	0.791305113	0.280118782
orf1a polyprotein	1945	1969	TGYKKPASRELKVTFFPDLNGDVVA	DPB1-0401_DPA1-0103;DPB1-0101_DPA1-0201;DQB1-0502_DQA1-0102;DQB1-0501_DQA1-0101;DRB1_0402	0.7913369	0.791305113	0.280118782
orf1ab polyprotein	674	698	SVQTFFKLVNKFLALCADSIIIGGA	DQB1-0201_DQA1-0501;DRB1_1602;DPB1-0101_DPA1-0201;DRB1_1502;DRB1_1601;DRB1_1101;DRB1_1401;DRB1_0701;DRB1_0101;DRB1_1001	0.673693038	0.697221945	0.590652377
orf1a polyprotein	674	698	SVQTFFKLVNKFLALCADSIIIGGA	DQB1-0201_DQA1-0501;DRB1_1602;DPB1-0101_DPA1-0201;DRB1_1502;DRB1_1601;DRB1_1101;DRB1_1401;DRB1_0701;DRB1_0101;DRB1_1001	0.673693038	0.697221945	0.590652377
orf1ab polyprotein	4688	4712	PNCVNCLDDRCILHCANFNVLFSTV	DPB1-0401_DPA1-0103;DRB1_0403;DRB1_0406;DRB1_1401;DRB1_1501	0.764780179	0.78109344	0.348552188
orf1ab polyprotein	530	554	LSPLYAFASEAARVVRSIFSRTLET	DQB1-0201_DQA1-0501;DRB1_1503;DQB1-0602_DQA1-0102;DRB1_0404;DQB1-0201_DQA1-0201;DRB1_1501;DQB1-0202_DQA1-0201	0.740989609	0.752252143	0.409971433
orf1ab polyprotein	529	553	ILSPLYAFASEAARVVRSIFSRTLE	DQB1-0201_DQA1-0501;DRB1_1503;DQB1-0602_DQA1-0102;DRB1_0404;DQB1-0201_DQA1-0201;DRB1_1501;DQB1-0202_DQA1-0201	0.740989609	0.752252143	0.409971433
orf1a polyprotein	530	554	LSPLYAFASEAARVVRSIFSRTLET	DQB1-0201_DQA1-0501;DRB1_1503;DQB1-0602_DQA1-0102;DRB1_0404;DQB1-0201_DQA1-0201;DRB1_1501;DQB1-0202_DQA1-0201	0.740989609	0.752252143	0.409971433
orf1a polyprotein	529	553	ILSPLYAFASEAARVVRSIFSRTLE	DQB1-0201_DQA1-0501;DRB1_1503;DQB1-0602_DQA1-0102;DRB1_0404;DQB1-0201_DQA1-0201;DRB1_1501;DQB1-0202_DQA1-0201	0.740989609	0.752252143	0.409971433
surface glycoprotein	1183	1207	IDRLNEVAKNLNESLIDLQELGKYE	DPB1-1001_DPA1-0201;DPB1-1401_DPA1-0201;DQB1-0502_DQA1-0102;DPB1-0501_DPA1-0202;DQB1-0604_DQA1-0102;DPB1-1701_DPA1-0201;DPB1-0901_DPA1-0201;DRB4_0103;DRB3_0301	0.63297046	0.63297046	0.782347893
orf1a polyprotein	3942	3966	QAIASEFSSLPSYAAFATAQEAYEQ	DRB1_0410;DRB1_1602;DRB1_1502;DQB1-0502_DQA1-0102;DQB1-0302_DQA1-0301;DRB1_0404;DRB1_1601;DRB1_0405;DRB1_0402;DRB1_0101;DQB1-0301_DQA1-0505;DQB1-0202_DQA1-0201;DRB1_0801	0.702438725	0.712229468	0.539281007
orf1ab polyprotein	3942	3966	QAIASEFSSLPSYAAFATAQEAYEQ	DRB1_0410;DRB1_1602;DRB1_1502;DQB1-0502_DQA1-0102;DQB1-0302_DQA1-0301;DRB1_0404;DRB1_1601;DRB1_0405;DRB1_0402;DRB1_0101;DQB1-0301_DQA1-0505;DQB1-0202_DQA1-0201;DRB1_0801	0.702438725	0.712229468	0.539281007
orf1a polyprotein	1343	1367	KTVLKKCKSAFYILPSIISNEKQEI	DPB1-1001_DPA1-0201;DRB1_1602;DRB1_0404;DRB1_0401;DRB1_0407;DRB1_0402;DRB1_0403;DQB1-0501_DQA1-0101;DRB1_1101;DRB1_1202;DRB1_1601;DRB1_0405;DRB1_1401;DPB1-0901_DPA1-0201;DRB1_0101	0.644663953	0.670282509	0.650350146
orf1ab polyprotein	1343	1367	KTVLKKCKSAFYILPSIISNEKQEI	DPB1-1001_DPA1-0201;DRB1_1602;DRB1_0404;DRB1_0401;DRB1_0407;DRB1_0402;DRB1_0403;DQB1-0501_DQA1-0101;DRB1_1101;DRB1_1202;DRB1_1601;DRB1_0405;DRB1_1401;DPB1-0901_DPA1-0201;DRB1_0101	0.644663953	0.670282509	0.650350146
orf1ab polyprotein	3555	3579	TPFDVVRQCSGVTFQSAVKRTIKGT	DRB5_0102;DRB1_1202;DRB5_0202;DRB1_1201;DRB1_1302;DRB5_0101;DRB1_0102;DPB1-0402_DPA1-0103;DPB1-0201_DPA1-0103	0.688421614	0.676853298	0.596647152
orf1a polyprotein	3555	3579	TPFDVVRQCSGVTFQSAVKRTIKGT	DRB5_0102;DRB1_1202;DRB5_0202;DRB1_1201;DRB1_1302;DRB5_0101;DRB1_0102;DPB1-0402_DPA1-0103;DPB1-0201_DPA1-0103	0.688421614	0.676853298	0.596647152
orf1a polyprotein	3947	3971	EFSSLPSYAAFATAQEAYEQAVANG	DRB1_0410;DQB1-0602_DQA1-0102;DQB1-0502_DQA1-0102;DQB1-0302_DQA1-0301;DRB1_0405;DQB1-0301_DQA1-0505;DQB1-0202_DQA1-0201;DRB1_0801	0.749917157	0.748966315	0.414775
orf1ab polyprotein	3947	3971	EFSSLPSYAAFATAQEAYEQAVANG	DRB1_0410;DQB1-0602_DQA1-0102;DQB1-0502_DQA1-0102;DQB1-0302_DQA1-0301;DRB1_0405;DQB1-0301_DQA1-0505;DQB1-0202_DQA1-0201;DRB1_0801	0.749917157	0.748966315	0.414775
orf1ab polyprotein	3948	3972	FSSLPSYAAFATAQEAYEQAVANGD	DRB1_0410;DQB1-0602_DQA1-0102;DQB1-0502_DQA1-0102;DQB1-0302_DQA1-0301;DRB1_0405;DQB1-0301_DQA1-0505;DQB1-0202_DQA1-0201;DRB1_0801	0.749917157	0.748966315	0.414775
orf1a polyprotein	3948	3972	FSSLPSYAAFATAQEAYEQAVANGD	DRB1_0410;DQB1-0602_DQA1-0102;DQB1-0502_DQA1-0102;DQB1-0302_DQA1-0301;DRB1_0405;DQB1-0301_DQA1-0505;DQB1-0202_DQA1-0201;DRB1_0801	0.749917157	0.748966315	0.414775
orf1ab polyprotein	1492	1516	SSSKTPEEHFIETISLAGSYKDWSY	DRB1_0410;DQB1-0602_DQA1-0102;DQB1-0303_DQA1-0201;DRB1_0401;DRB1_0403;DRB1_0407;DRB1_1101;DRB1_0411;DRB1_0701;DQB1-0202_DQA1-0201	0.74131959	0.758396664	0.37233398
orf1ab polyprotein	1493	1517	SSKTPEEHFIETISLAGSYKDWSYS	DRB1_0410;DQB1-0602_DQA1-0102;DQB1-0303_DQA1-0201;DRB1_0401;DRB1_0403;DRB1_0407;DRB1_1101;DRB1_0411;DRB1_0701;DQB1-0202_DQA1-0201	0.74131959	0.758396664	0.37233398
orf1ab polyprotein	1491	1515	TSSSKTPEEHFIETISLAGSYKDWS	DRB1_0410;DQB1-0602_DQA1-0102;DQB1-0303_DQA1-0201;DRB1_0401;DRB1_0403;DRB1_0407;DRB1_1101;DRB1_0411;DRB1_0701;DQB1-0202_DQA1-0201	0.74131959	0.758396664	0.37233398
orf1a polyprotein	1492	1516	SSSKTPEEHFIETISLAGSYKDWSY	DRB1_0410;DQB1-0602_DQA1-0102;DQB1-0303_DQA1-0201;DRB1_0401;DRB1_0403;DRB1_0407;DRB1_1101;DRB1_0411;DRB1_0701;DQB1-0202_DQA1-0201	0.74131959	0.758396664	0.37233398
orf1ab polyprotein	1494	1518	SKTPEEHFIETISLAGSYKDWSYSG	DRB1_0410;DQB1-0602_DQA1-0102;DQB1-0303_DQA1-0201;DRB1_0401;DRB1_0403;DRB1_0407;DRB1_1101;DRB1_0411;DRB1_0701;DQB1-0202_DQA1-0201	0.74131959	0.758396664	0.37233398
orf1a polyprotein	1493	1517	SSKTPEEHFIETISLAGSYKDWSYS	DRB1_0410;DQB1-0602_DQA1-0102;DQB1-0303_DQA1-0201;DRB1_0401;DRB1_0403;DRB1_0407;DRB1_1101;DRB1_0411;DRB1_0701;DQB1-0202_DQA1-0201	0.74131959	0.758396664	0.37233398
orf1ab polyprotein	1495	1519	KTPEEHFIETISLAGSYKDWSYSGQ	DRB1_0410;DQB1-0602_DQA1-0102;DQB1-0303_DQA1-0201;DRB1_0401;DRB1_0403;DRB1_0407;DRB1_1101;DRB1_0411;DRB1_0701;DQB1-0202_DQA1-0201	0.74131959	0.758396664	0.37233398
orf1a polyprotein	1495	1519	KTPEEHFIETISLAGSYKDWSYSGQ	DRB1_0410;DQB1-0602_DQA1-0102;DQB1-0303_DQA1-0201;DRB1_0401;DRB1_0403;DRB1_0407;DRB1_1101;DRB1_0411;DRB1_0701;DQB1-0202_DQA1-0201	0.74131959	0.758396664	0.37233398
orf1a polyprotein	1494	1518	SKTPEEHFIETISLAGSYKDWSYSG	DRB1_0410;DQB1-0602_DQA1-0102;DQB1-0303_DQA1-0201;DRB1_0401;DRB1_0403;DRB1_0407;DRB1_1101;DRB1_0411;DRB1_0701;DQB1-0202_DQA1-0201	0.74131959	0.758396664	0.37233398
orf1a polyprotein	1491	1515	TSSSKTPEEHFIETISLAGSYKDWS	DRB1_0410;DQB1-0602_DQA1-0102;DQB1-0303_DQA1-0201;DRB1_0401;DRB1_0403;DRB1_0407;DRB1_1101;DRB1_0411;DRB1_0701;DQB1-0202_DQA1-0201	0.74131959	0.758396664	0.37233398
orf1a polyprotein	267	291	NGECPNFVFPLNSIIKTIQPRVEKK	DQB1-0303_DQA1-0201;DQB1-0302_DQA1-0301;DPB1-0501_DPA1-0202;DRB5_0101;DRB1_0302;DQB1-0603_DQA1-0103;DQB1-0202_DQA1-0201	0.679119453	0.67255915	0.671808506
orf1ab polyprotein	267	291	NGECPNFVFPLNSIIKTIQPRVEKK	DQB1-0303_DQA1-0201;DQB1-0302_DQA1-0301;DPB1-0501_DPA1-0202;DRB5_0101;DRB1_0302;DQB1-0603_DQA1-0103;DQB1-0202_DQA1-0201	0.679119453	0.67255915	0.671808506
orf1a polyprotein	2620	2644	LAKNVSLDNVLSTFISAARQGFVDS	DPB1-0101_DPA1-0202;DQB1-0303_DQA1-0201;DQB1-0602_DQA1-0102;DRB1_0301;DRB1_0901;DPB1-0501_DPA1-0202;DRB5_0202;DRB1_1101;DRB1_1402	0.589063615	0.590677362	0.778256492
orf1ab polyprotein	2620	2644	LAKNVSLDNVLSTFISAARQGFVDS	DPB1-0101_DPA1-0202;DQB1-0303_DQA1-0201;DQB1-0602_DQA1-0102;DRB1_0301;DRB1_0901;DPB1-0501_DPA1-0202;DRB5_0202;DRB1_1101;DRB1_1402	0.589063615	0.590677362	0.778256492
orf1ab polyprotein	5915	5939	EIPRRNVATLQAENVTGLFKDCSKV	DPB1-0101_DPA1-0202;DQB1-0201_DQA1-0501;DQB1-0303_DQA1-0201;DPB1-0101_DPA1-0103;DQB1-0201_DQA1-0201;DQB1-0302_DQA1-0301;DQB1-0601_DQA1-0103;DRB1_1201;DRB1_0102;DRB1_0101;DQB1-0202_DQA1-0201	0.708168247	0.712998939	0.496656746
orf1ab polyprotein	5435	5459	TCDWTNAGDYILANTCTERLKLFAA	DRB3_0202;DRB5_0101;DRB3_0201;DRB1_1402;DRB1_0803;DRB1_0701;DRB1_0405;DRB1_1406;DQB1-0202_DQA1-0201;DRB1_0801	0.753955742	0.755142185	0.358991603
orf1ab polyprotein	5436	5460	CDWTNAGDYILANTCTERLKLFAAE	DRB3_0202;DRB5_0101;DRB3_0201;DRB1_1402;DRB1_0803;DRB1_0701;DRB1_0405;DRB1_1406;DQB1-0202_DQA1-0201;DRB1_0801	0.753955742	0.755142185	0.358991603
orf1ab polyprotein	5437	5461	DWTNAGDYILANTCTERLKLFAAET	DRB3_0202;DRB5_0101;DRB3_0201;DRB1_1402;DRB1_0803;DRB1_0701;DRB1_0405;DRB1_1406;DQB1-0202_DQA1-0201;DRB1_0801	0.753955742	0.755142185	0.358991603
orf1ab polyprotein	5438	5462	WTNAGDYILANTCTERLKLFAAETL	DRB3_0202;DRB5_0101;DRB3_0201;DRB1_1402;DRB1_0803;DRB1_0701;DRB1_0405;DRB1_1406;DQB1-0202_DQA1-0201;DRB1_0801	0.753955742	0.755142185	0.358991603
ORF7a protein	50	74	ADNKFALTCFSTQFAFACPDGVKHV	DPB1-0401_DPA1-0103;DRB1_0404;DRB1_0901;DRB1_0402;DQB1-0202_DQA1-0201	0.77962833	0.776230969	0.27893385
ORF7a protein	51	75	DNKFALTCFSTQFAFACPDGVKHVY	DPB1-0401_DPA1-0103;DRB1_0404;DRB1_0901;DRB1_0402;DQB1-0202_DQA1-0201	0.77962833	0.776230969	0.27893385
ORF7a protein	49	73	LADNKFALTCFSTQFAFACPDGVKH	DPB1-0401_DPA1-0103;DRB1_0404;DRB1_0901;DRB1_0402;DQB1-0202_DQA1-0201	0.77962833	0.776230969	0.27893385
orf1a polyprotein	4061	4085	IIPLTTAAKLMVVIPDYNTYKNTCD	DPB1-1401_DPA1-0201;DPB1-0101_DPA1-0201;DQB1-0602_DQA1-0102;DQB1-0302_DQA1-0301;DQB1-0601_DQA1-0103;DRB1_0406;DRB1_1401;DRB4_0103	0.748639227	0.748959933	0.360635298
orf1ab polyprotein	4058	4082	PLNIIPLTTAAKLMVVIPDYNTYKN	DPB1-1401_DPA1-0201;DPB1-0101_DPA1-0201;DQB1-0602_DQA1-0102;DQB1-0302_DQA1-0301;DQB1-0601_DQA1-0103;DRB1_0406;DRB1_1401;DRB4_0103	0.748639227	0.748959933	0.360635298
orf1a polyprotein	4059	4083	LNIIPLTTAAKLMVVIPDYNTYKNT	DPB1-1401_DPA1-0201;DPB1-0101_DPA1-0201;DQB1-0602_DQA1-0102;DQB1-0302_DQA1-0301;DQB1-0601_DQA1-0103;DRB1_0406;DRB1_1401;DRB4_0103	0.748639227	0.748959933	0.360635298
orf1a polyprotein	4058	4082	PLNIIPLTTAAKLMVVIPDYNTYKN	DPB1-1401_DPA1-0201;DPB1-0101_DPA1-0201;DQB1-0602_DQA1-0102;DQB1-0302_DQA1-0301;DQB1-0601_DQA1-0103;DRB1_0406;DRB1_1401;DRB4_0103	0.748639227	0.748959933	0.360635298
orf1ab polyprotein	4061	4085	IIPLTTAAKLMVVIPDYNTYKNTCD	DPB1-1401_DPA1-0201;DPB1-0101_DPA1-0201;DQB1-0602_DQA1-0102;DQB1-0302_DQA1-0301;DQB1-0601_DQA1-0103;DRB1_0406;DRB1_1401;DRB4_0103	0.748639227	0.748959933	0.360635298
orf1ab polyprotein	4059	4083	LNIIPLTTAAKLMVVIPDYNTYKNT	DPB1-1401_DPA1-0201;DPB1-0101_DPA1-0201;DQB1-0602_DQA1-0102;DQB1-0302_DQA1-0301;DQB1-0601_DQA1-0103;DRB1_0406;DRB1_1401;DRB4_0103	0.748639227	0.748959933	0.360635298
orf1ab polyprotein	4060	4084	NIIPLTTAAKLMVVIPDYNTYKNTC	DPB1-1401_DPA1-0201;DPB1-0101_DPA1-0201;DQB1-0602_DQA1-0102;DQB1-0302_DQA1-0301;DQB1-0601_DQA1-0103;DRB1_0406;DRB1_1401;DRB4_0103	0.748639227	0.748959933	0.360635298
orf1a polyprotein	4060	4084	NIIPLTTAAKLMVVIPDYNTYKNTC	DPB1-1401_DPA1-0201;DPB1-0101_DPA1-0201;DQB1-0602_DQA1-0102;DQB1-0302_DQA1-0301;DQB1-0601_DQA1-0103;DRB1_0406;DRB1_1401;DRB4_0103	0.748639227	0.748959933	0.360635298
surface glycoprotein	362	386	VADYSVLYNSASFSTFKCYGVSPTK	DPB1-0401_DPA1-0103;DRB3_0202;DRB1_0802;DRB1_1502	0.787189593	0.778815243	0.244909405
surface glycoprotein	363	387	ADYSVLYNSASFSTFKCYGVSPTKL	DPB1-0401_DPA1-0103;DRB3_0202;DRB1_0802;DRB1_1502	0.787189593	0.778815243	0.244909405
surface glycoprotein	1017	1041	EIRASANLAATKMSECVLGQSKRVD	DPB1-0101_DPA1-0202;DPB1-0401_DPA1-0103;DPB1-0402_DPA1-0103	0.800887712	0.79433775	0.209679
surface glycoprotein	1018	1042	IRASANLAATKMSECVLGQSKRVDF	DPB1-0101_DPA1-0202;DPB1-0401_DPA1-0103;DPB1-0402_DPA1-0103	0.800887712	0.79433775	0.209679
orf1a polyprotein	4023	4047	AKVTSAMQTMLFTMLRKLDNDALNN	DPB1-0401_DPA1-0103;DRB1_1602;DRB1_1101;DRB1_1303;DRB1_0803;DRB1_1404;DRB1_1104;DRB1_0802;DRB1_0801	0.763450762	0.753851941	0.36202732
orf1ab polyprotein	4022	4046	RAKVTSAMQTMLFTMLRKLDNDALN	DPB1-0401_DPA1-0103;DRB1_1602;DRB1_1101;DRB1_1303;DRB1_0803;DRB1_1404;DRB1_1104;DRB1_0802;DRB1_0801	0.763450762	0.753851941	0.36202732
orf1ab polyprotein	4024	4048	KVTSAMQTMLFTMLRKLDNDALNNI	DPB1-0401_DPA1-0103;DRB1_1602;DRB1_1101;DRB1_1303;DRB1_0803;DRB1_1404;DRB1_1104;DRB1_0802;DRB1_0801	0.763450762	0.753851941	0.36202732
orf1a polyprotein	4022	4046	RAKVTSAMQTMLFTMLRKLDNDALN	DPB1-0401_DPA1-0103;DRB1_1602;DRB1_1101;DRB1_1303;DRB1_0803;DRB1_1404;DRB1_1104;DRB1_0802;DRB1_0801	0.763450762	0.753851941	0.36202732
orf1ab polyprotein	4023	4047	AKVTSAMQTMLFTMLRKLDNDALNN	DPB1-0401_DPA1-0103;DRB1_1602;DRB1_1101;DRB1_1303;DRB1_0803;DRB1_1404;DRB1_1104;DRB1_0802;DRB1_0801	0.763450762	0.753851941	0.36202732
orf1ab polyprotein	4025	4049	VTSAMQTMLFTMLRKLDNDALNNII	DPB1-0401_DPA1-0103;DRB1_1602;DRB1_1101;DRB1_1303;DRB1_0803;DRB1_1404;DRB1_1104;DRB1_0802;DRB1_0801	0.763450762	0.753851941	0.36202732
orf1a polyprotein	4024	4048	KVTSAMQTMLFTMLRKLDNDALNNI	DPB1-0401_DPA1-0103;DRB1_1602;DRB1_1101;DRB1_1303;DRB1_0803;DRB1_1404;DRB1_1104;DRB1_0802;DRB1_0801	0.763450762	0.753851941	0.36202732
orf1a polyprotein	4025	4049	VTSAMQTMLFTMLRKLDNDALNNII	DPB1-0401_DPA1-0103;DRB1_1602;DRB1_1101;DRB1_1303;DRB1_0803;DRB1_1404;DRB1_1104;DRB1_0802;DRB1_0801	0.763450762	0.753851941	0.36202732
orf1ab polyprotein	2945	2969	YESLRPDTRYVLMDGSIIQFPNTYL	DRB1_1602;DRB1_1502;DRB1_0301;DRB1_1601;DRB1_0401;DRB5_0102;DRB1_0302;DRB1_1501;DRB1_0101;DRB1_1001	0.65379119	0.743362357	0.511650608
orf1a polyprotein	2946	2970	ESLRPDTRYVLMDGSIIQFPNTYLE	DRB1_1602;DRB1_1502;DRB1_0301;DRB1_1601;DRB1_0401;DRB5_0102;DRB1_0302;DRB1_1501;DRB1_0101;DRB1_1001	0.65379119	0.743362357	0.511650608
orf1a polyprotein	2944	2968	AYESLRPDTRYVLMDGSIIQFPNTY	DRB1_1602;DRB1_1502;DRB1_0301;DRB1_1601;DRB1_0401;DRB5_0102;DRB1_0302;DRB1_1501;DRB1_0101;DRB1_1001	0.65379119	0.743362357	0.511650608
orf1ab polyprotein	2944	2968	AYESLRPDTRYVLMDGSIIQFPNTY	DRB1_1602;DRB1_1502;DRB1_0301;DRB1_1601;DRB1_0401;DRB5_0102;DRB1_0302;DRB1_1501;DRB1_0101;DRB1_1001	0.65379119	0.743362357	0.511650608
orf1ab polyprotein	2946	2970	ESLRPDTRYVLMDGSIIQFPNTYLE	DRB1_1602;DRB1_1502;DRB1_0301;DRB1_1601;DRB1_0401;DRB5_0102;DRB1_0302;DRB1_1501;DRB1_0101;DRB1_1001	0.65379119	0.743362357	0.511650608
orf1a polyprotein	2945	2969	YESLRPDTRYVLMDGSIIQFPNTYL	DRB1_1602;DRB1_1502;DRB1_0301;DRB1_1601;DRB1_0401;DRB5_0102;DRB1_0302;DRB1_1501;DRB1_0101;DRB1_1001	0.65379119	0.743362357	0.511650608
orf1a polyprotein	527	551	KSILSPLYAFASEAARVVRSIFSRT	DQB1-0201_DQA1-0501;DRB1_1503;DQB1-0602_DQA1-0102;DRB1_0404;DRB1_0402;DRB1_1501;DQB1-0202_DQA1-0201	0.747013174	0.75809743	0.332904736
orf1ab polyprotein	527	551	KSILSPLYAFASEAARVVRSIFSRT	DQB1-0201_DQA1-0501;DRB1_1503;DQB1-0602_DQA1-0102;DRB1_0404;DRB1_0402;DRB1_1501;DQB1-0202_DQA1-0201	0.747013174	0.75809743	0.332904736
orf1a polyprotein	526	550	QKSILSPLYAFASEAARVVRSIFSR	DQB1-0201_DQA1-0501;DRB1_1503;DQB1-0602_DQA1-0102;DRB1_0404;DRB1_0402;DRB1_1501;DQB1-0202_DQA1-0201	0.747013174	0.75809743	0.332904736
orf1ab polyprotein	526	550	QKSILSPLYAFASEAARVVRSIFSR	DQB1-0201_DQA1-0501;DRB1_1503;DQB1-0602_DQA1-0102;DRB1_0404;DRB1_0402;DRB1_1501;DQB1-0202_DQA1-0201	0.747013174	0.75809743	0.332904736
orf1ab polyprotein	1320	1344	VPTDNYITTYPGQGLNGYTVEEAKT	DRB1_1503;DQB1-0401_DQA1-0301;DQB1-0303_DQA1-0201;DQB1-0502_DQA1-0102;DQB1-0602_DQA1-0102;DRB1_1502;DRB5_0202;DQB1-0501_DQA1-0101;DQB1-0402_DQA1-0401;DRB1_1501;DRB1_0802	0.6843998	0.682058887	0.5497641
orf1a polyprotein	1320	1344	VPTDNYITTYPGQGLNGYTVEEAKT	DRB1_1503;DQB1-0401_DQA1-0301;DQB1-0303_DQA1-0201;DQB1-0502_DQA1-0102;DQB1-0602_DQA1-0102;DRB1_1502;DRB5_0202;DQB1-0501_DQA1-0101;DQB1-0402_DQA1-0401;DRB1_1501;DRB1_0802	0.6843998	0.682058887	0.5497641
orf1a polyprotein	591	615	ATNNLVVMAYITGGVVQLTSQWLTN	DRB1_1503;DRB1_1602;DRB1_1601;DRB1_1202;DRB1_1201;DRB1_0102;DRB4_0103;DRB1_1501;DRB1_1404;DQB1-0301_DQA1-0505	0.735648277	0.733230689	0.39648854
orf1a polyprotein	596	620	VVMAYITGGVVQLTSQWLTNIFGTV	DRB1_1503;DRB1_1602;DRB1_1601;DRB1_1202;DRB1_1201;DRB1_0102;DRB4_0103;DRB1_1501;DRB1_1404;DQB1-0301_DQA1-0505	0.735648277	0.733230689	0.39648854
orf1ab polyprotein	593	617	NNLVVMAYITGGVVQLTSQWLTNIF	DRB1_1503;DRB1_1602;DRB1_1601;DRB1_1202;DRB1_1201;DRB1_0102;DRB4_0103;DRB1_1501;DRB1_1404;DQB1-0301_DQA1-0505	0.735648277	0.733230689	0.39648854
orf1a polyprotein	599	623	AYITGGVVQLTSQWLTNIFGTVYEK	DRB1_1503;DRB1_1602;DRB1_1601;DRB1_1202;DRB1_1201;DRB1_0102;DRB4_0103;DRB1_1501;DRB1_1404;DQB1-0301_DQA1-0505	0.735648277	0.733230689	0.39648854
orf1a polyprotein	600	624	YITGGVVQLTSQWLTNIFGTVYEKL	DRB1_1503;DRB1_1602;DRB1_1601;DRB1_1202;DRB1_1201;DRB1_0102;DRB4_0103;DRB1_1501;DRB1_1404;DQB1-0301_DQA1-0505	0.735648277	0.733230689	0.39648854
orf1a polyprotein	593	617	NNLVVMAYITGGVVQLTSQWLTNIF	DRB1_1503;DRB1_1602;DRB1_1601;DRB1_1202;DRB1_1201;DRB1_0102;DRB4_0103;DRB1_1501;DRB1_1404;DQB1-0301_DQA1-0505	0.735648277	0.733230689	0.39648854
orf1ab polyprotein	600	624	YITGGVVQLTSQWLTNIFGTVYEKL	DRB1_1503;DRB1_1602;DRB1_1601;DRB1_1202;DRB1_1201;DRB1_0102;DRB4_0103;DRB1_1501;DRB1_1404;DQB1-0301_DQA1-0505	0.735648277	0.733230689	0.39648854
orf1ab polyprotein	592	616	TNNLVVMAYITGGVVQLTSQWLTNI	DRB1_1503;DRB1_1602;DRB1_1601;DRB1_1202;DRB1_1201;DRB1_0102;DRB4_0103;DRB1_1501;DRB1_1404;DQB1-0301_DQA1-0505	0.735648277	0.733230689	0.39648854
orf1ab polyprotein	599	623	AYITGGVVQLTSQWLTNIFGTVYEK	DRB1_1503;DRB1_1602;DRB1_1601;DRB1_1202;DRB1_1201;DRB1_0102;DRB4_0103;DRB1_1501;DRB1_1404;DQB1-0301_DQA1-0505	0.735648277	0.733230689	0.39648854
orf1a polyprotein	592	616	TNNLVVMAYITGGVVQLTSQWLTNI	DRB1_1503;DRB1_1602;DRB1_1601;DRB1_1202;DRB1_1201;DRB1_0102;DRB4_0103;DRB1_1501;DRB1_1404;DQB1-0301_DQA1-0505	0.735648277	0.733230689	0.39648854
orf1a polyprotein	598	622	MAYITGGVVQLTSQWLTNIFGTVYE	DRB1_1503;DRB1_1602;DRB1_1601;DRB1_1202;DRB1_1201;DRB1_0102;DRB4_0103;DRB1_1501;DRB1_1404;DQB1-0301_DQA1-0505	0.735648277	0.733230689	0.39648854
orf1ab polyprotein	594	618	NLVVMAYITGGVVQLTSQWLTNIFG	DRB1_1503;DRB1_1602;DRB1_1601;DRB1_1202;DRB1_1201;DRB1_0102;DRB4_0103;DRB1_1501;DRB1_1404;DQB1-0301_DQA1-0505	0.735648277	0.733230689	0.39648854
orf1ab polyprotein	595	619	LVVMAYITGGVVQLTSQWLTNIFGT	DRB1_1503;DRB1_1602;DRB1_1601;DRB1_1202;DRB1_1201;DRB1_0102;DRB4_0103;DRB1_1501;DRB1_1404;DQB1-0301_DQA1-0505	0.735648277	0.733230689	0.39648854
orf1a polyprotein	595	619	LVVMAYITGGVVQLTSQWLTNIFGT	DRB1_1503;DRB1_1602;DRB1_1601;DRB1_1202;DRB1_1201;DRB1_0102;DRB4_0103;DRB1_1501;DRB1_1404;DQB1-0301_DQA1-0505	0.735648277	0.733230689	0.39648854
orf1ab polyprotein	597	621	VMAYITGGVVQLTSQWLTNIFGTVY	DRB1_1503;DRB1_1602;DRB1_1601;DRB1_1202;DRB1_1201;DRB1_0102;DRB4_0103;DRB1_1501;DRB1_1404;DQB1-0301_DQA1-0505	0.735648277	0.733230689	0.39648854
orf1a polyprotein	594	618	NLVVMAYITGGVVQLTSQWLTNIFG	DRB1_1503;DRB1_1602;DRB1_1601;DRB1_1202;DRB1_1201;DRB1_0102;DRB4_0103;DRB1_1501;DRB1_1404;DQB1-0301_DQA1-0505	0.735648277	0.733230689	0.39648854
orf1ab polyprotein	596	620	VVMAYITGGVVQLTSQWLTNIFGTV	DRB1_1503;DRB1_1602;DRB1_1601;DRB1_1202;DRB1_1201;DRB1_0102;DRB4_0103;DRB1_1501;DRB1_1404;DQB1-0301_DQA1-0505	0.735648277	0.733230689	0.39648854
orf1ab polyprotein	591	615	ATNNLVVMAYITGGVVQLTSQWLTN	DRB1_1503;DRB1_1602;DRB1_1601;DRB1_1202;DRB1_1201;DRB1_0102;DRB4_0103;DRB1_1501;DRB1_1404;DQB1-0301_DQA1-0505	0.735648277	0.733230689	0.39648854
orf1ab polyprotein	598	622	MAYITGGVVQLTSQWLTNIFGTVYE	DRB1_1503;DRB1_1602;DRB1_1601;DRB1_1202;DRB1_1201;DRB1_0102;DRB4_0103;DRB1_1501;DRB1_1404;DQB1-0301_DQA1-0505	0.735648277	0.733230689	0.39648854
orf1a polyprotein	597	621	VMAYITGGVVQLTSQWLTNIFGTVY	DRB1_1503;DRB1_1602;DRB1_1601;DRB1_1202;DRB1_1201;DRB1_0102;DRB4_0103;DRB1_1501;DRB1_1404;DQB1-0301_DQA1-0505	0.735648277	0.733230689	0.39648854
orf1ab polyprotein	5907	5931	DKLQFTSLEIPRRNVATLQAENVTG	DPB1-0101_DPA1-0202;DQB1-0201_DQA1-0501;DQB1-0303_DQA1-0201;DPB1-0101_DPA1-0103;DQB1-0302_DQA1-0301;DQB1-0201_DQA1-0201;DQB1-0601_DQA1-0103;DRB1_1201;DPB1-0301_DPA1-0103;DQB1-0202_DQA1-0201	0.71343797	0.706488231	0.466654899
ORF7a protein	37	61	SGTYEGNSPFHPLADNKFALTCFST	DPB1-0401_DPA1-0103;DRB3_0202;DQB1-0502_DQA1-0102	0.780595395	0.780595395	0.218193897
orf1a polyprotein	1561	1585	SLREVRTIKVFTTVDNINLHTQVVD	DRB1_1602;DQB1-0602_DQA1-0102;DQB1-0303_DQA1-0201;DRB1_0404;DRB1_1601;DRB5_0202;DRB1_0402;DRB4_0103;DQB1-0202_DQA1-0201	0.784779868	0.784041024	0.130162634
orf1ab polyprotein	1561	1585	SLREVRTIKVFTTVDNINLHTQVVD	DRB1_1602;DQB1-0602_DQA1-0102;DQB1-0303_DQA1-0201;DRB1_0404;DRB1_1601;DRB5_0202;DRB1_0402;DRB4_0103;DQB1-0202_DQA1-0201	0.784779868	0.784041024	0.130162634
orf1a polyprotein	1341	1365	EAKTVLKKCKSAFYILPSIISNEKQ	DPB1-1001_DPA1-0201;DRB1_1602;DRB1_0404;DRB1_0401;DRB1_0407;DRB1_0402;DRB1_0403;DQB1-0501_DQA1-0101;DRB1_1101;DRB1_1202;DRB1_1601;DRB1_0405;DPB1-0901_DPA1-0201;DRB1_1404;DRB1_0101	0.623021988	0.645566844	0.646598499
orf1a polyprotein	1342	1366	AKTVLKKCKSAFYILPSIISNEKQE	DPB1-1001_DPA1-0201;DRB1_1602;DRB1_0404;DRB1_0401;DRB1_0407;DRB1_0402;DRB1_0403;DQB1-0501_DQA1-0101;DRB1_1101;DRB1_1202;DRB1_1601;DRB1_0405;DPB1-0901_DPA1-0201;DRB1_1404;DRB1_0101	0.623021988	0.645566844	0.646598499
orf1ab polyprotein	1341	1365	EAKTVLKKCKSAFYILPSIISNEKQ	DPB1-1001_DPA1-0201;DRB1_1602;DRB1_0404;DRB1_0401;DRB1_0407;DRB1_0402;DRB1_0403;DQB1-0501_DQA1-0101;DRB1_1101;DRB1_1202;DRB1_1601;DRB1_0405;DPB1-0901_DPA1-0201;DRB1_1404;DRB1_0101	0.623021988	0.645566844	0.646598499
orf1ab polyprotein	1342	1366	AKTVLKKCKSAFYILPSIISNEKQE	DPB1-1001_DPA1-0201;DRB1_1602;DRB1_0404;DRB1_0401;DRB1_0407;DRB1_0402;DRB1_0403;DQB1-0501_DQA1-0101;DRB1_1101;DRB1_1202;DRB1_1601;DRB1_0405;DPB1-0901_DPA1-0201;DRB1_1404;DRB1_0101	0.623021988	0.645566844	0.646598499
surface glycoprotein	1166	1190	LGDISGINASVVNIQKEIDRLNEVA	DQB1-0201_DQA1-0501;DQB1-0602_DQA1-0102;DQB1-0502_DQA1-0102;DQB1-0302_DQA1-0301;DQB1-0301_DQA1-0303;DRB1_1303;DRB1_0803	0.705355951	0.701026951	0.491811459
surface glycoprotein	1165	1189	DLGDISGINASVVNIQKEIDRLNEV	DQB1-0201_DQA1-0501;DQB1-0602_DQA1-0102;DQB1-0502_DQA1-0102;DQB1-0302_DQA1-0301;DQB1-0301_DQA1-0303;DRB1_1303;DRB1_0803	0.705355951	0.701026951	0.491811459
surface glycoprotein	1170	1194	SGINASVVNIQKEIDRLNEVAKNLN	DPB1-1401_DPA1-0201;DQB1-0602_DQA1-0102;DQB1-0502_DQA1-0102;DQB1-0302_DQA1-0301;DPB1-0501_DPA1-0202;DRB1_1303;DPB1-1701_DPA1-0201;DRB1_0803;DPB1-0901_DPA1-0201	0.510601731	0.503411343	0.846795847
orf1a polyprotein	2886	2910	PRVFSAVGNICYTPSKLIEYTDFAT	DPB1-0401_DPA1-0103;DRB1_1503;DRB1_1602;DRB1_1601;DRB1_0701	0.771179649	0.767500089	0.258976583
orf1ab polyprotein	2886	2910	PRVFSAVGNICYTPSKLIEYTDFAT	DPB1-0401_DPA1-0103;DRB1_1503;DRB1_1602;DRB1_1601;DRB1_0701	0.771179649	0.767500089	0.258976583
orf1ab polyprotein	528	552	SILSPLYAFASEAARVVRSIFSRTL	DQB1-0201_DQA1-0501;DRB1_1503;DQB1-0602_DQA1-0102;DRB1_0404;DRB1_1501;DQB1-0202_DQA1-0201	0.740989609	0.752252143	0.327483555
orf1a polyprotein	528	552	SILSPLYAFASEAARVVRSIFSRTL	DQB1-0201_DQA1-0501;DRB1_1503;DQB1-0602_DQA1-0102;DRB1_0404;DRB1_1501;DQB1-0202_DQA1-0201	0.740989609	0.752252143	0.327483555
orf1ab polyprotein	4769	4793	DPAMHAASGNLLLDKRTTCFSVAAL	DPB1-0101_DPA1-0201;DRB1_0301;DRB1_0901;DRB1_0302;DRB1_0701;DRB1_1404;DRB1_0101;DQB1-0301_DQA1-0505	0.676542586	0.712886147	0.489261084
orf1ab polyprotein	4767	4791	AADPAMHAASGNLLLDKRTTCFSVA	DPB1-0101_DPA1-0201;DRB1_0301;DRB1_0901;DRB1_0302;DRB1_0701;DRB1_1404;DRB1_0101;DQB1-0301_DQA1-0505	0.676542586	0.712886147	0.489261084
orf1ab polyprotein	4768	4792	ADPAMHAASGNLLLDKRTTCFSVAA	DPB1-0101_DPA1-0201;DRB1_0301;DRB1_0901;DRB1_0302;DRB1_0701;DRB1_1404;DRB1_0101;DQB1-0301_DQA1-0505	0.676542586	0.712886147	0.489261084
surface glycoprotein	844	868	IAARDLICAQKFNGLTVLPPLLTDE	DPB1-0401_DPA1-0103;DPB1-1701_DPA1-0201;DRB1_0804;DPB1-0901_DPA1-0201;DRB1_0101	0.747426	0.755031092	0.318199809
orf1ab polyprotein	2404	2428	CNSSTCMMCYKRNRATRVECTTIVN	DQB1-0602_DQA1-0102;DRB3_0202;DRB1_1302;DRB1_0701;DRB3_0301;DRB1_0101	0.727980269	0.75199169	0.321678033
orf1a polyprotein	2404	2428	CNSSTCMMCYKRNRATRVECTTIVN	DQB1-0602_DQA1-0102;DRB3_0202;DRB1_1302;DRB1_0701;DRB3_0301;DRB1_0101	0.727980269	0.75199169	0.321678033
orf1ab polyprotein	5544	5568	NVGDYFVLTSHTVMPLSAPTLVPQE	DQB1-0201_DQA1-0501;DRB1_1602;DRB1_1301;DQB1-0303_DQA1-0201;DRB1_1502;DRB1_1601;DRB1_1101;DRB1_1202;DRB1_1201;DRB1_1402;DRB1_0102;DRB1_0101;DRB1_1001;DRB1_0802	0.648888699	0.632008024	0.630623504
orf1ab polyprotein	5909	5933	LQFTSLEIPRRNVATLQAENVTGLF	DPB1-0101_DPA1-0202;DQB1-0201_DQA1-0501;DQB1-0303_DQA1-0201;DPB1-0101_DPA1-0103;DQB1-0302_DQA1-0301;DQB1-0201_DQA1-0201;DRB1_1202;DRB1_1201;DPB1-0301_DPA1-0103;DQB1-0202_DQA1-0201	0.710503483	0.700112976	0.473339988
surface glycoprotein	78	102	RFDNPVLPFNDGVYFASTEKSNIIR	DQB1-0201_DQA1-0501;DQB1-0302_DQA1-0301;DRB1_0403;DRB1_0404;DRB1_1401;DQB1-0301_DQA1-0505;DQB1-0202_DQA1-0201	0.747069585	0.747665606	0.347996947
ORF3a protein	20	44	IKDATPSDFVRATATIPIQASLPFG	DQB1-0201_DQA1-0501;DQB1-0303_DQA1-0201;DQB1-0602_DQA1-0102;DRB1_0901;DRB1_0701;DRB1_1404;DRB3_0301;DRB1_1001	0.687882023	0.687765922	0.526327079
ORF3a protein	21	45	KDATPSDFVRATATIPIQASLPFGW	DQB1-0201_DQA1-0501;DQB1-0303_DQA1-0201;DQB1-0602_DQA1-0102;DRB1_0901;DRB1_0701;DRB1_1404;DRB3_0301;DRB1_1001	0.687882023	0.687765922	0.526327079
ORF3a protein	22	46	DATPSDFVRATATIPIQASLPFGWL	DQB1-0201_DQA1-0501;DQB1-0303_DQA1-0201;DQB1-0602_DQA1-0102;DRB1_0901;DRB1_0701;DRB1_1404;DRB3_0301;DRB1_1001	0.687882023	0.687765922	0.526327079
orf1a polyprotein	531	555	SPLYAFASEAARVVRSIFSRTLETA	DQB1-0201_DQA1-0501;DRB1_1503;DQB1-0602_DQA1-0102;DQB1-0201_DQA1-0201;DRB1_1501;DQB1-0202_DQA1-0201	0.719683172	0.729780327	0.398192823
orf1ab polyprotein	531	555	SPLYAFASEAARVVRSIFSRTLETA	DQB1-0201_DQA1-0501;DRB1_1503;DQB1-0602_DQA1-0102;DQB1-0201_DQA1-0201;DRB1_1501;DQB1-0202_DQA1-0201	0.719683172	0.729780327	0.398192823
surface glycoprotein	420	444	DYNYKLPDDFTGCVIAWNSNNLDSK	DRB1_1503;DRB1_0410;DQB1-0303_DQA1-0201;DQB1-0602_DQA1-0102;DRB5_0202;DQB1-0604_DQA1-0102;DRB1_0411;DQB1-0601_DQA1-0103;DQB1-0303_DQA1-0301;DRB1_1501;DQB1-0301_DQA1-0505	0.6811816	0.688807997	0.509576212
orf1a polyprotein	1326	1350	ITTYPGQGLNGYTVEEAKTVLKKCK	DQB1-0201_DQA1-0501;DQB1-0401_DQA1-0301;DQB1-0502_DQA1-0102;DRB5_0102;DQB1-0501_DQA1-0101;DQB1-0402_DQA1-0401;DRB1_0101;DRB3_0101	0.70680985	0.720717634	0.418601558
orf1a polyprotein	1327	1351	TTYPGQGLNGYTVEEAKTVLKKCKS	DQB1-0201_DQA1-0501;DQB1-0401_DQA1-0301;DQB1-0502_DQA1-0102;DRB5_0102;DQB1-0501_DQA1-0101;DQB1-0402_DQA1-0401;DRB1_0101;DRB3_0101	0.70680985	0.720717634	0.418601558
orf1ab polyprotein	1326	1350	ITTYPGQGLNGYTVEEAKTVLKKCK	DQB1-0201_DQA1-0501;DQB1-0401_DQA1-0301;DQB1-0502_DQA1-0102;DRB5_0102;DQB1-0501_DQA1-0101;DQB1-0402_DQA1-0401;DRB1_0101;DRB3_0101	0.70680985	0.720717634	0.418601558
orf1ab polyprotein	1327	1351	TTYPGQGLNGYTVEEAKTVLKKCKS	DQB1-0201_DQA1-0501;DQB1-0401_DQA1-0301;DQB1-0502_DQA1-0102;DRB5_0102;DQB1-0501_DQA1-0101;DQB1-0402_DQA1-0401;DRB1_0101;DRB3_0101	0.70680985	0.720717634	0.418601558
orf1ab polyprotein	1829	1853	GNYQCGHYKHITSKETLYCIDGALL	DRB1_1602;DRB1_1502;DRB1_1601;DRB1_0407;DRB1_0405;DRB1_0804;DRB1_0402;DRB1_0701;DRB1_1404;DRB3_0101;DRB1_0101;DRB1_1001;DRB1_0801	0.670137892	0.674989639	0.549987111
orf1a polyprotein	1829	1853	GNYQCGHYKHITSKETLYCIDGALL	DRB1_1602;DRB1_1502;DRB1_1601;DRB1_0407;DRB1_0405;DRB1_0804;DRB1_0402;DRB1_0701;DRB1_1404;DRB3_0101;DRB1_0101;DRB1_1001;DRB1_0801	0.670137892	0.674989639	0.549987111
orf1a polyprotein	4122	4146	LAWPLIVTALRANSAVKLQNNELSP	DRB3_0202;DRB1_1202;DRB3_0201;DRB1_0102;DRB4_0103;DRB3_0301;DRB1_0101	0.785135403	0.790849966	0.193254724
orf1ab polyprotein	4122	4146	LAWPLIVTALRANSAVKLQNNELSP	DRB3_0202;DRB1_1202;DRB3_0201;DRB1_0102;DRB4_0103;DRB3_0301;DRB1_0101	0.785135403	0.790849966	0.193254724
surface glycoprotein	419	443	ADYNYKLPDDFTGCVIAWNSNNLDS	DRB1_1503;DRB1_0410;DQB1-0303_DQA1-0201;DQB1-0602_DQA1-0102;DRB5_0202;DQB1-0604_DQA1-0102;DQB1-0601_DQA1-0103;DQB1-0303_DQA1-0301;DRB1_1501;DQB1-0301_DQA1-0505	0.678045351	0.688807997	0.509576212
orf1a polyprotein	1537	1561	YTSNPTTFHLDGEVITFDNLKTLLS	DQB1-0201_DQA1-0501;DRB1_1503;DRB1_0301;DRB1_0302;DRB1_0402;DRB1_1501;DRB3_0101	0.718646273	0.739713747	0.347767897
orf1a polyprotein	1538	1562	TSNPTTFHLDGEVITFDNLKTLLSL	DQB1-0201_DQA1-0501;DRB1_1503;DRB1_0301;DRB1_0302;DRB1_0402;DRB1_1501;DRB3_0101	0.718646273	0.739713747	0.347767897
orf1ab polyprotein	1537	1561	YTSNPTTFHLDGEVITFDNLKTLLS	DQB1-0201_DQA1-0501;DRB1_1503;DRB1_0301;DRB1_0302;DRB1_0402;DRB1_1501;DRB3_0101	0.718646273	0.739713747	0.347767897
orf1ab polyprotein	1538	1562	TSNPTTFHLDGEVITFDNLKTLLSL	DQB1-0201_DQA1-0501;DRB1_1503;DRB1_0301;DRB1_0302;DRB1_0402;DRB1_1501;DRB3_0101	0.718646273	0.739713747	0.347767897
surface glycoprotein	1164	1188	VDLGDISGINASVVNIQKEIDRLNE	DQB1-0201_DQA1-0501;DQB1-0602_DQA1-0102;DQB1-0502_DQA1-0102;DQB1-0302_DQA1-0301;DQB1-0301_DQA1-0303;DRB1_0803	0.697012248	0.695003911	0.491511209
surface glycoprotein	1161	1185	SPDVDLGDISGINASVVNIQKEIDR	DQB1-0201_DQA1-0501;DQB1-0602_DQA1-0102;DQB1-0502_DQA1-0102;DQB1-0302_DQA1-0301;DQB1-0301_DQA1-0303;DRB1_0803	0.697012248	0.695003911	0.491511209
surface glycoprotein	1162	1186	PDVDLGDISGINASVVNIQKEIDRL	DQB1-0201_DQA1-0501;DQB1-0602_DQA1-0102;DQB1-0502_DQA1-0102;DQB1-0302_DQA1-0301;DQB1-0301_DQA1-0303;DRB1_0803	0.697012248	0.695003911	0.491511209
surface glycoprotein	1163	1187	DVDLGDISGINASVVNIQKEIDRLN	DQB1-0201_DQA1-0501;DQB1-0602_DQA1-0102;DQB1-0502_DQA1-0102;DQB1-0302_DQA1-0301;DQB1-0301_DQA1-0303;DRB1_0803	0.697012248	0.695003911	0.491511209
ORF3a protein	54	78	AVFQSASKIITLKKRWQLALSKGVH	DPB1-0101_DPA1-0202;DRB1_1102;DPB1-1401_DPA1-0201;DRB1_1301;DPB1-1301_DPA1-0201;DRB1_0901;DRB1_1601;DRB1_1101;DRB1_1202;DRB1_1401;DRB1_0701;DRB1_0804;DRB1_1404;DRB1_1104;DRB1_0802;DRB1_1406;DRB1_0801	0.629157682	0.609598518	0.65373493
ORF3a protein	56	80	FQSASKIITLKKRWQLALSKGVHFV	DPB1-0101_DPA1-0202;DRB1_1102;DPB1-1401_DPA1-0201;DRB1_1301;DPB1-1301_DPA1-0201;DRB1_0901;DRB1_1601;DRB1_1101;DRB1_1202;DRB1_1401;DRB1_0701;DRB1_0804;DRB1_1404;DRB1_1104;DRB1_0802;DRB1_1406;DRB1_0801	0.629157682	0.609598518	0.65373493
ORF3a protein	55	79	VFQSASKIITLKKRWQLALSKGVHF	DPB1-0101_DPA1-0202;DRB1_1102;DPB1-1401_DPA1-0201;DRB1_1301;DPB1-1301_DPA1-0201;DRB1_0901;DRB1_1601;DRB1_1101;DRB1_1202;DRB1_1401;DRB1_0701;DRB1_0804;DRB1_1404;DRB1_1104;DRB1_0802;DRB1_1406;DRB1_0801	0.629157682	0.609598518	0.65373493
orf1ab polyprotein	5762	5786	LGTCRRCPAEIVDTVSALVYDNKLK	DQB1-0303_DQA1-0201;DRB1_0301;DQB1-0201_DQA1-0201;DRB1_0406;DQB1-0601_DQA1-0103;DRB1_0701;DQB1-0301_DQA1-0505;DQB1-0202_DQA1-0201	0.691174934	0.719360089	0.441322504
orf1ab polyprotein	5764	5788	TCRRCPAEIVDTVSALVYDNKLKAH	DQB1-0303_DQA1-0201;DRB1_0301;DQB1-0201_DQA1-0201;DRB1_0406;DQB1-0601_DQA1-0103;DRB1_0701;DQB1-0301_DQA1-0505;DQB1-0202_DQA1-0201	0.691174934	0.719360089	0.441322504
orf1ab polyprotein	5763	5787	GTCRRCPAEIVDTVSALVYDNKLKA	DQB1-0303_DQA1-0201;DRB1_0301;DQB1-0201_DQA1-0201;DRB1_0406;DQB1-0601_DQA1-0103;DRB1_0701;DQB1-0301_DQA1-0505;DQB1-0202_DQA1-0201	0.691174934	0.719360089	0.441322504
orf1ab polyprotein	5765	5789	CRRCPAEIVDTVSALVYDNKLKAHK	DQB1-0303_DQA1-0201;DRB1_0301;DQB1-0201_DQA1-0201;DRB1_0406;DQB1-0601_DQA1-0103;DRB1_0701;DQB1-0301_DQA1-0505;DQB1-0202_DQA1-0201	0.691174934	0.719360089	0.441322504
membrane glycoprotein	164	188	LPKEITVATSRTLSYYKLGASQRVA	DRB1_1503;DQB1-0303_DQA1-0201;DQB1-0502_DQA1-0102;DRB1_0403;DRB1_0404;DRB1_0901;DRB1_0406;DRB1_0102;DRB1_1501;DRB1_1406;DQB1-0301_DQA1-0505;DQB1-0202_DQA1-0201	0.685640806	0.680585448	0.520385772
orf1a polyprotein	3291	3315	NGLWLDDVVYCPRHVICTSEDMLNP	DPB1-1001_DPA1-0201;DQB1-0401_DQA1-0301;DRB1_1102;DRB1_1301;DPB1-0101_DPA1-0103;DQB1-0201_DQA1-0201;DQB1-0302_DQA1-0301;DPB1-1701_DPA1-0201;DRB1_1405;DRB1_1302;DRB1_0406;DPB1-1101_DPA1-0201;DRB1_1401;DPB1-0901_DPA1-0201;DRB1_1404;DRB1_1406;DQB1-0603_DQA1-0103;DQB1-0202_DQA1-0201	0.651870801	0.644573814	0.598545392
orf1a polyprotein	3290	3314	LNGLWLDDVVYCPRHVICTSEDMLN	DPB1-1001_DPA1-0201;DQB1-0401_DQA1-0301;DRB1_1102;DRB1_1301;DPB1-0101_DPA1-0103;DQB1-0201_DQA1-0201;DQB1-0302_DQA1-0301;DPB1-1701_DPA1-0201;DRB1_1405;DRB1_1302;DRB1_0406;DPB1-1101_DPA1-0201;DRB1_1401;DPB1-0901_DPA1-0201;DRB1_1404;DRB1_1406;DQB1-0603_DQA1-0103;DQB1-0202_DQA1-0201	0.651870801	0.644573814	0.598545392
orf1ab polyprotein	3290	3314	LNGLWLDDVVYCPRHVICTSEDMLN	DPB1-1001_DPA1-0201;DQB1-0401_DQA1-0301;DRB1_1102;DRB1_1301;DPB1-0101_DPA1-0103;DQB1-0201_DQA1-0201;DQB1-0302_DQA1-0301;DPB1-1701_DPA1-0201;DRB1_1405;DRB1_1302;DRB1_0406;DPB1-1101_DPA1-0201;DRB1_1401;DPB1-0901_DPA1-0201;DRB1_1404;DRB1_1406;DQB1-0603_DQA1-0103;DQB1-0202_DQA1-0201	0.651870801	0.644573814	0.598545392
orf1ab polyprotein	3291	3315	NGLWLDDVVYCPRHVICTSEDMLNP	DPB1-1001_DPA1-0201;DQB1-0401_DQA1-0301;DRB1_1102;DRB1_1301;DPB1-0101_DPA1-0103;DQB1-0201_DQA1-0201;DQB1-0302_DQA1-0301;DPB1-1701_DPA1-0201;DRB1_1405;DRB1_1302;DRB1_0406;DPB1-1101_DPA1-0201;DRB1_1401;DPB1-0901_DPA1-0201;DRB1_1404;DRB1_1406;DQB1-0603_DQA1-0103;DQB1-0202_DQA1-0201	0.651870801	0.644573814	0.598545392
ORF3a protein	151	175	TNCYDYCIPYNSVTSSIVITSGDGT	DQB1-0201_DQA1-0501;DRB1_1602;DQB1-0303_DQA1-0201;DQB1-0602_DQA1-0102;DRB1_1601;DQB1-0601_DQA1-0103;DQB1-0301_DQA1-0505;DQB1-0301_DQA1-0601	0.690466004	0.687873252	0.499144263
ORF3a protein	152	176	NCYDYCIPYNSVTSSIVITSGDGTT	DQB1-0201_DQA1-0501;DRB1_1602;DQB1-0303_DQA1-0201;DQB1-0602_DQA1-0102;DRB1_1601;DQB1-0601_DQA1-0103;DQB1-0301_DQA1-0505;DQB1-0301_DQA1-0601	0.690466004	0.687873252	0.499144263
ORF3a protein	156	180	YCIPYNSVTSSIVITSGDGTTSPIS	DQB1-0201_DQA1-0501;DRB1_1602;DQB1-0303_DQA1-0201;DQB1-0602_DQA1-0102;DRB1_1601;DQB1-0601_DQA1-0103;DQB1-0301_DQA1-0505;DQB1-0301_DQA1-0601	0.690466004	0.687873252	0.499144263
ORF3a protein	154	178	YDYCIPYNSVTSSIVITSGDGTTSP	DQB1-0201_DQA1-0501;DRB1_1602;DQB1-0303_DQA1-0201;DQB1-0602_DQA1-0102;DRB1_1601;DQB1-0601_DQA1-0103;DQB1-0301_DQA1-0505;DQB1-0301_DQA1-0601	0.690466004	0.687873252	0.499144263
ORF3a protein	153	177	CYDYCIPYNSVTSSIVITSGDGTTS	DQB1-0201_DQA1-0501;DRB1_1602;DQB1-0303_DQA1-0201;DQB1-0602_DQA1-0102;DRB1_1601;DQB1-0601_DQA1-0103;DQB1-0301_DQA1-0505;DQB1-0301_DQA1-0601	0.690466004	0.687873252	0.499144263
ORF3a protein	155	179	DYCIPYNSVTSSIVITSGDGTTSPI	DQB1-0201_DQA1-0501;DRB1_1602;DQB1-0303_DQA1-0201;DQB1-0602_DQA1-0102;DRB1_1601;DQB1-0601_DQA1-0103;DQB1-0301_DQA1-0505;DQB1-0301_DQA1-0601	0.690466004	0.687873252	0.499144263
orf1ab polyprotein	2554	2578	AKSASVYYSQLMCQPILLLDQALVS	DRB4_0103;DRB3_0101;DRB1_1202;DRB1_0301	0.770035208	0.778861552	0.239319491
orf1a polyprotein	2554	2578	AKSASVYYSQLMCQPILLLDQALVS	DRB4_0103;DRB3_0101;DRB1_1202;DRB1_0301	0.770035208	0.778861552	0.239319491
orf1ab polyprotein	2555	2579	KSASVYYSQLMCQPILLLDQALVSD	DRB4_0103;DRB3_0101;DRB1_1202;DRB1_0301	0.770035208	0.778861552	0.239319491
orf1a polyprotein	2555	2579	KSASVYYSQLMCQPILLLDQALVSD	DRB4_0103;DRB3_0101;DRB1_1202;DRB1_0301	0.770035208	0.778861552	0.239319491
orf1ab polyprotein	2557	2581	ASVYYSQLMCQPILLLDQALVSDVG	DRB4_0103;DRB3_0101;DRB1_1202;DRB1_0301	0.770035208	0.778861552	0.239319491
orf1a polyprotein	2556	2580	SASVYYSQLMCQPILLLDQALVSDV	DRB4_0103;DRB3_0101;DRB1_1202;DRB1_0301	0.770035208	0.778861552	0.239319491
orf1a polyprotein	2557	2581	ASVYYSQLMCQPILLLDQALVSDVG	DRB4_0103;DRB3_0101;DRB1_1202;DRB1_0301	0.770035208	0.778861552	0.239319491
orf1ab polyprotein	2556	2580	SASVYYSQLMCQPILLLDQALVSDV	DRB4_0103;DRB3_0101;DRB1_1202;DRB1_0301	0.770035208	0.778861552	0.239319491
orf1ab polyprotein	2172	2196	FFTLLLQLCTFTRSTNSRIKASMPT	DQB1-0602_DQA1-0102;DRB1_1601;DRB1_0901;DRB5_0102;DRB5_0101;DRB1_0701;DRB1_0101	0.696994081	0.719829572	0.422270671
orf1a polyprotein	2173	2197	FTLLLQLCTFTRSTNSRIKASMPTT	DQB1-0602_DQA1-0102;DRB1_1601;DRB1_0901;DRB5_0102;DRB5_0101;DRB1_0701;DRB1_0101	0.696994081	0.719829572	0.422270671
orf1a polyprotein	2172	2196	FFTLLLQLCTFTRSTNSRIKASMPT	DQB1-0602_DQA1-0102;DRB1_1601;DRB1_0901;DRB5_0102;DRB5_0101;DRB1_0701;DRB1_0101	0.696994081	0.719829572	0.422270671
orf1ab polyprotein	2173	2197	FTLLLQLCTFTRSTNSRIKASMPTT	DQB1-0602_DQA1-0102;DRB1_1601;DRB1_0901;DRB5_0102;DRB5_0101;DRB1_0701;DRB1_0101	0.696994081	0.719829572	0.422270671
ORF9b protein	60	84	TLNSLEDKAFQLTPIAVQMTKLATT	DQB1-0602_DQA1-0102;DRB4_0103;DRB1_0402;DRB1_0407;DPB1-0202_DPA1-0103;DPB1-0201_DPA1-0103	0.723350854	0.71852763	0.399456623
orf1a polyprotein	2711	2735	LIWNVKDFMSLSEQLRKQIRSAAKK	DQB1-0201_DQA1-0501;DQB1-0302_DQA1-0301;DQB1-0201_DQA1-0201;DRB5_0102;DRB5_0101;DRB1_1402;DPB1-1101_DPA1-0201;DRB1_1406;DQB1-0202_DQA1-0201	0.729373561	0.724467213	0.349583542
orf1ab polyprotein	2711	2735	LIWNVKDFMSLSEQLRKQIRSAAKK	DQB1-0201_DQA1-0501;DQB1-0302_DQA1-0301;DQB1-0201_DQA1-0201;DRB5_0102;DRB5_0101;DRB1_1402;DPB1-1101_DPA1-0201;DRB1_1406;DQB1-0202_DQA1-0201	0.729373561	0.724467213	0.349583542
orf1a polyprotein	266	290	FNGECPNFVFPLNSIIKTIQPRVEK	DQB1-0302_DQA1-0301;DPB1-0501_DPA1-0202;DRB5_0101;DRB1_0302;DQB1-0603_DQA1-0103;DQB1-0202_DQA1-0201	0.644309935	0.637037962	0.671808506
orf1ab polyprotein	266	290	FNGECPNFVFPLNSIIKTIQPRVEK	DQB1-0302_DQA1-0301;DPB1-0501_DPA1-0202;DRB5_0101;DRB1_0302;DQB1-0603_DQA1-0103;DQB1-0202_DQA1-0201	0.644309935	0.637037962	0.671808506
orf1a polyprotein	1344	1368	TVLKKCKSAFYILPSIISNEKQEIL	DPB1-1001_DPA1-0201;DRB1_1602;DRB1_0404;DRB1_0401;DRB1_0407;DRB1_0402;DRB1_0403;DQB1-0501_DQA1-0101;DRB1_1101;DRB1_1601;DRB1_0405;DRB1_1401;DPB1-0901_DPA1-0201;DRB1_0101	0.638900273	0.670282509	0.570950488
orf1ab polyprotein	1344	1368	TVLKKCKSAFYILPSIISNEKQEIL	DPB1-1001_DPA1-0201;DRB1_1602;DRB1_0404;DRB1_0401;DRB1_0407;DRB1_0402;DRB1_0403;DQB1-0501_DQA1-0101;DRB1_1101;DRB1_1601;DRB1_0405;DRB1_1401;DPB1-0901_DPA1-0201;DRB1_0101	0.638900273	0.670282509	0.570950488
orf1ab polyprotein	269	293	ECPNFVFPLNSIIKTIQPRVEKKKL	DQB1-0303_DQA1-0201;DQB1-0301_DQA1-0601;DPB1-0501_DPA1-0202;DQB1-0201_DQA1-0201;DQB1-0302_DQA1-0301;DRB1_0302;DQB1-0603_DQA1-0103;DQB1-0202_DQA1-0201	0.545599436	0.536309357	0.785416114
orf1a polyprotein	269	293	ECPNFVFPLNSIIKTIQPRVEKKKL	DQB1-0303_DQA1-0201;DQB1-0301_DQA1-0601;DPB1-0501_DPA1-0202;DQB1-0201_DQA1-0201;DQB1-0302_DQA1-0301;DRB1_0302;DQB1-0603_DQA1-0103;DQB1-0202_DQA1-0201	0.545599436	0.536309357	0.785416114
orf1ab polyprotein	4062	4086	IPLTTAAKLMVVIPDYNTYKNTCDG	DPB1-1401_DPA1-0201;DPB1-0101_DPA1-0201;DQB1-0602_DQA1-0102;DQB1-0302_DQA1-0301;DRB1_0406;DRB1_1401;DRB4_0103	0.744222429	0.744548771	0.270588212
orf1a polyprotein	4062	4086	IPLTTAAKLMVVIPDYNTYKNTCDG	DPB1-1401_DPA1-0201;DPB1-0101_DPA1-0201;DQB1-0602_DQA1-0102;DQB1-0302_DQA1-0301;DRB1_0406;DRB1_1401;DRB4_0103	0.744222429	0.744548771	0.270588212
orf1ab polyprotein	2346	2370	IMQLFFSYFAVHFISNSWLMWLIIN	DPB1-0401_DPA1-0103;DQB1-0201_DQA1-0501;DRB1_1404;DRB1_0406	0.759254121	0.757750055	0.25898649
orf1a polyprotein	2346	2370	IMQLFFSYFAVHFISNSWLMWLIIN	DPB1-0401_DPA1-0103;DQB1-0201_DQA1-0501;DRB1_1404;DRB1_0406	0.759254121	0.757750055	0.25898649
ORF3a protein	200	224	CVVLHSYFTSDYYQLYSTQLSTDTG	DPB1-0401_DPA1-0103;DRB1_1602;DRB1_1502;DPB1-0101_DPA1-0103;DRB1_1601;DRB1_0407;DRB1_0101	0.748598408	0.751284934	0.30310911
orf1a polyprotein	1944	1968	LTGYKKPASRELKVTFFPDLNGDVV	DPB1-0401_DPA1-0103;DPB1-0101_DPA1-0201;DQB1-0501_DQA1-0101	0.781341281	0.781341281	0.141794157
orf1ab polyprotein	1944	1968	LTGYKKPASRELKVTFFPDLNGDVV	DPB1-0401_DPA1-0103;DPB1-0101_DPA1-0201;DQB1-0501_DQA1-0101	0.781341281	0.781341281	0.141794157
orf1ab polyprotein	270	294	CPNFVFPLNSIIKTIQPRVEKKKLD	DQB1-0303_DQA1-0201;DQB1-0301_DQA1-0601;DPB1-0501_DPA1-0202;DQB1-0201_DQA1-0201;DQB1-0302_DQA1-0301;DQB1-0603_DQA1-0103;DQB1-0202_DQA1-0201	0.536253709	0.536253709	0.785416114
orf1a polyprotein	270	294	CPNFVFPLNSIIKTIQPRVEKKKLD	DQB1-0303_DQA1-0201;DQB1-0301_DQA1-0601;DPB1-0501_DPA1-0202;DQB1-0201_DQA1-0201;DQB1-0302_DQA1-0301;DQB1-0603_DQA1-0103;DQB1-0202_DQA1-0201	0.536253709	0.536253709	0.785416114
orf1ab polyprotein	1535	1559	VYYTSNPTTFHLDGEVITFDNLKTL	DQB1-0201_DQA1-0501;DRB1_1503;DRB1_0301;DRB1_0302;DRB1_1501;DRB3_0101	0.711197938	0.732603387	0.342192447
orf1ab polyprotein	1536	1560	YYTSNPTTFHLDGEVITFDNLKTLL	DQB1-0201_DQA1-0501;DRB1_1503;DRB1_0301;DRB1_0302;DRB1_1501;DRB3_0101	0.711197938	0.732603387	0.342192447
orf1a polyprotein	1536	1560	YYTSNPTTFHLDGEVITFDNLKTLL	DQB1-0201_DQA1-0501;DRB1_1503;DRB1_0301;DRB1_0302;DRB1_1501;DRB3_0101	0.711197938	0.732603387	0.342192447
orf1a polyprotein	1535	1559	VYYTSNPTTFHLDGEVITFDNLKTL	DQB1-0201_DQA1-0501;DRB1_1503;DRB1_0301;DRB1_0302;DRB1_1501;DRB3_0101	0.711197938	0.732603387	0.342192447
orf1ab polyprotein	1325	1349	YITTYPGQGLNGYTVEEAKTVLKKC	DQB1-0201_DQA1-0501;DQB1-0401_DQA1-0301;DQB1-0502_DQA1-0102;DQB1-0501_DQA1-0101;DQB1-0402_DQA1-0401;DRB1_0101;DRB3_0101	0.693501506	0.708040586	0.418601558
orf1a polyprotein	1325	1349	YITTYPGQGLNGYTVEEAKTVLKKC	DQB1-0201_DQA1-0501;DQB1-0401_DQA1-0301;DQB1-0502_DQA1-0102;DQB1-0501_DQA1-0101;DQB1-0402_DQA1-0401;DRB1_0101;DRB3_0101	0.693501506	0.708040586	0.418601558
orf1ab polyprotein	5243	5267	DGTLMIERFVSLAIDAYPLTKHPNQ	DPB1-0401_DPA1-0103;DPB1-0301_DPA1-0103;DPB1-0601_DPA1-0103	0.798551631	0.798551631	0.103191
orf1ab polyprotein	5244	5268	GTLMIERFVSLAIDAYPLTKHPNQE	DPB1-0401_DPA1-0103;DPB1-0301_DPA1-0103;DPB1-0601_DPA1-0103	0.798551631	0.798551631	0.103191
orf1a polyprotein	4123	4147	AWPLIVTALRANSAVKLQNNELSPV	DRB3_0202;DRB1_1202;DRB3_0201;DRB4_0103;DRB3_0301;DRB1_0101	0.774667084	0.782782829	0.192751659
orf1ab polyprotein	4124	4148	WPLIVTALRANSAVKLQNNELSPVA	DRB3_0202;DRB1_1202;DRB3_0201;DRB4_0103;DRB3_0301;DRB1_0101	0.774667084	0.782782829	0.192751659
orf1a polyprotein	4125	4149	PLIVTALRANSAVKLQNNELSPVAL	DRB3_0202;DRB1_1202;DRB3_0201;DRB4_0103;DRB3_0301;DRB1_0101	0.774667084	0.782782829	0.192751659
orf1a polyprotein	4124	4148	WPLIVTALRANSAVKLQNNELSPVA	DRB3_0202;DRB1_1202;DRB3_0201;DRB4_0103;DRB3_0301;DRB1_0101	0.774667084	0.782782829	0.192751659
orf1ab polyprotein	4125	4149	PLIVTALRANSAVKLQNNELSPVAL	DRB3_0202;DRB1_1202;DRB3_0201;DRB4_0103;DRB3_0301;DRB1_0101	0.774667084	0.782782829	0.192751659
orf1ab polyprotein	4123	4147	AWPLIVTALRANSAVKLQNNELSPV	DRB3_0202;DRB1_1202;DRB3_0201;DRB4_0103;DRB3_0301;DRB1_0101	0.774667084	0.782782829	0.192751659
surface glycoprotein	231	255	IGINITRFQTLLALHRSYLTPGDSS	DRB1_1301;DPB1-0101_DPA1-0103;DRB1_0404;DRB5_0102;DRB1_0406;DRB1_1405;DRB5_0101;DPB1-0301_DPA1-0103;DRB1_1401;DRB1_0402;DRB1_1501;DRB1_1404;DPB1-0601_DPA1-0103	0.695115553	0.727178638	0.372531647
surface glycoprotein	232	256	GINITRFQTLLALHRSYLTPGDSSS	DRB1_1301;DPB1-0101_DPA1-0103;DRB1_0404;DRB5_0102;DRB1_0406;DRB1_1405;DRB5_0101;DPB1-0301_DPA1-0103;DRB1_1401;DRB1_0402;DRB1_1501;DRB1_1404;DPB1-0601_DPA1-0103	0.695115553	0.727178638	0.372531647
orf1ab polyprotein	4979	5003	VVIGTSKFYGGWHNMLKTVYSDVEN	DPB1-0401_DPA1-0103;DRB1_1402;DQB1-0603_DQA1-0103;DQB1-0202_DQA1-0201	0.782769981	0.780897051	0.080833949
orf1a polyprotein	2876	2900	TTNGDFLHFLPRVFSAVGNICYTPS	DQB1-0201_DQA1-0501;DQB1-0401_DQA1-0301;DRB1_1102;DRB1_0403;DRB1_0404;DRB1_1101;DRB1_1402;DRB1_1401;DRB1_0804;DRB1_1104;DRB1_0802;DPB1-0201_DPA1-0103;DRB1_1406;DRB1_0801	0.635485369	0.611950939	0.617672229
orf1ab polyprotein	2876	2900	TTNGDFLHFLPRVFSAVGNICYTPS	DQB1-0201_DQA1-0501;DQB1-0401_DQA1-0301;DRB1_1102;DRB1_0403;DRB1_0404;DRB1_1101;DRB1_1402;DRB1_1401;DRB1_0804;DRB1_1104;DRB1_0802;DPB1-0201_DPA1-0103;DRB1_1406;DRB1_0801	0.635485369	0.611950939	0.617672229
orf1a polyprotein	4259	4283	EVPANSTVLSFCAFAVDAAKAYKDY	DRB1_1503;DQB1-0302_DQA1-0301;DRB1_0701;DRB1_1501;DRB3_0101	0.692284952	0.717059851	0.392295717
orf1ab polyprotein	4259	4283	EVPANSTVLSFCAFAVDAAKAYKDY	DRB1_1503;DQB1-0302_DQA1-0301;DRB1_0701;DRB1_1501;DRB3_0101	0.692284952	0.717059851	0.392295717
orf1a polyprotein	1615	1639	GKTFYVLPNDDTLRVEAFEYYHTTD	DPB1-0401_DPA1-0103;DRB1_1602;DPB1-1301_DPA1-0201;DRB1_0404;DRB1_0101	0.757776314	0.76765959	0.200804283
orf1ab polyprotein	1615	1639	GKTFYVLPNDDTLRVEAFEYYHTTD	DPB1-0401_DPA1-0103;DRB1_1602;DPB1-1301_DPA1-0201;DRB1_0404;DRB1_0101	0.757776314	0.76765959	0.200804283
orf1ab polyprotein	675	699	VQTFFKLVNKFLALCADSIIIGGAK	DQB1-0201_DQA1-0501;DRB1_1602;DPB1-0101_DPA1-0201;DRB1_1502;DRB1_1601;DQB1-0604_DQA1-0102;DRB1_1401;DRB1_0701;DRB1_0101;DRB1_1001	0.646032417	0.670665017	0.527045823
orf1a polyprotein	675	699	VQTFFKLVNKFLALCADSIIIGGAK	DQB1-0201_DQA1-0501;DRB1_1602;DPB1-0101_DPA1-0201;DRB1_1502;DRB1_1601;DQB1-0604_DQA1-0102;DRB1_1401;DRB1_0701;DRB1_0101;DRB1_1001	0.646032417	0.670665017	0.527045823
orf1ab polyprotein	5740	5764	TLEPEYFNSVCRLMKTIGPDMFLGT	DQB1-0602_DQA1-0102;DRB1_1101;DQB1-0303_DQA1-0301;DRB1_1402;DRB1_1104;DRB1_0802;DQB1-0301_DQA1-0505;DQB1-0202_DQA1-0201;DPB1-0601_DPA1-0103	0.697717364	0.688965436	0.43627068
orf1ab polyprotein	5547	5571	DYFVLTSHTVMPLSAPTLVPQEHYV	DQB1-0201_DQA1-0501;DQB1-0303_DQA1-0201;DRB1_1202;DRB1_1201;DRB1_0102;DRB4_0103;DRB1_0101	0.719010846	0.724257374	0.337888665
envelope protein	9	33	TGTLIVNSVLLFLAFVVFLLVTLAI	DPB1-0401_DPA1-0103;DRB3_0202;DRB3_0201;DRB1_0302	0.780815515	0.776334356	0.080319
envelope protein	10	34	GTLIVNSVLLFLAFVVFLLVTLAIL	DPB1-0401_DPA1-0103;DRB3_0202;DRB3_0201;DRB1_0302	0.780815515	0.776334356	0.080319
orf1ab polyprotein	5687	5711	LPETTADIVVFDEISMATNYDLSVV	DRB1_1503;DRB1_1301;DRB1_0301;DQB1-0302_DQA1-0301;DRB1_0901;DQB1-0601_DQA1-0103;DRB1_1501	0.61523105	0.65442719	0.581597212
orf1ab polyprotein	5686	5710	ALPETTADIVVFDEISMATNYDLSV	DRB1_1503;DRB1_1301;DRB1_0301;DQB1-0302_DQA1-0301;DRB1_0901;DQB1-0601_DQA1-0103;DRB1_1501	0.61523105	0.65442719	0.581597212
orf1ab polyprotein	5685	5709	NALPETTADIVVFDEISMATNYDLS	DRB1_1503;DRB1_1301;DRB1_0301;DQB1-0302_DQA1-0301;DRB1_0901;DQB1-0601_DQA1-0103;DRB1_1501	0.61523105	0.65442719	0.581597212
orf1ab polyprotein	3289	3313	TLNGLWLDDVVYCPRHVICTSEDML	DPB1-1001_DPA1-0201;DQB1-0401_DQA1-0301;DRB1_1102;DRB1_1301;DRB1_0301;DPB1-0101_DPA1-0103;DQB1-0302_DQA1-0301;DPB1-1701_DPA1-0201;DRB1_1405;DRB1_1302;DRB1_0406;DRB1_1401;DPB1-0901_DPA1-0201;DRB1_1404;DQB1-0603_DQA1-0103;DRB1_1406	0.621435454	0.635109711	0.597535611
orf1a polyprotein	3289	3313	TLNGLWLDDVVYCPRHVICTSEDML	DPB1-1001_DPA1-0201;DQB1-0401_DQA1-0301;DRB1_1102;DRB1_1301;DRB1_0301;DPB1-0101_DPA1-0103;DQB1-0302_DQA1-0301;DPB1-1701_DPA1-0201;DRB1_1405;DRB1_1302;DRB1_0406;DRB1_1401;DPB1-0901_DPA1-0201;DRB1_1404;DQB1-0603_DQA1-0103;DRB1_1406	0.621435454	0.635109711	0.597535611
orf1ab polyprotein	5741	5765	LEPEYFNSVCRLMKTIGPDMFLGTC	DQB1-0602_DQA1-0102;DRB1_1101;DQB1-0303_DQA1-0301;DRB1_1104;DRB1_0802;DQB1-0301_DQA1-0505;DQB1-0202_DQA1-0201;DPB1-0601_DPA1-0103	0.694828158	0.688965436	0.43593082
orf1a polyprotein	1350	1374	KSAFYILPSIISNEKQEILGTVSWN	DQB1-0201_DQA1-0501;DRB1_1602;DRB1_1301;DRB1_0404;DRB1_1101;DRB1_1405;DRB1_0406;DRB1_1402;DRB1_0302;DRB1_0405;DRB1_0402;DRB1_1401;DRB1_1404;DRB3_0301;DRB1_0101;DRB1_1406	0.65131995	0.647569771	0.543659327
orf1ab polyprotein	1350	1374	KSAFYILPSIISNEKQEILGTVSWN	DQB1-0201_DQA1-0501;DRB1_1602;DRB1_1301;DRB1_0404;DRB1_1101;DRB1_1405;DRB1_0406;DRB1_1402;DRB1_0302;DRB1_0405;DRB1_0402;DRB1_1401;DRB1_1404;DRB3_0301;DRB1_0101;DRB1_1406	0.65131995	0.647569771	0.543659327
ORF3a protein	199	223	DCVVLHSYFTSDYYQLYSTQLSTDT	DPB1-0401_DPA1-0103;DRB1_1602;DRB1_1502;DRB1_1601;DRB1_0101	0.738353964	0.745899474	0.300849666
ORF3a protein	198	222	KDCVVLHSYFTSDYYQLYSTQLSTD	DPB1-0401_DPA1-0103;DRB1_1602;DRB1_1502;DRB1_1601;DRB1_0101	0.738353964	0.745899474	0.300849666
orf1ab polyprotein	5543	5567	LNVGDYFVLTSHTVMPLSAPTLVPQ	DQB1-0201_DQA1-0501;DRB1_1602;DRB1_1301;DQB1-0303_DQA1-0201;DRB1_1502;DRB1_1601;DRB5_0102;DRB1_1101;DRB1_1201;DRB1_1402;DRB1_0102;DRB1_0101;DRB1_1001;DRB1_0802	0.656137862	0.645136506	0.541506989
orf1ab polyprotein	1539	1563	SNPTTFHLDGEVITFDNLKTLLSLR	DQB1-0201_DQA1-0501;DRB1_1503;DRB1_0401;DRB1_0404;DRB1_0302;DRB1_0402;DRB1_1501;DRB3_0101	0.711283322	0.738469796	0.2927887
orf1a polyprotein	1539	1563	SNPTTFHLDGEVITFDNLKTLLSLR	DQB1-0201_DQA1-0501;DRB1_1503;DRB1_0401;DRB1_0404;DRB1_0302;DRB1_0402;DRB1_1501;DRB3_0101	0.711283322	0.738469796	0.2927887
orf1a polyprotein	1540	1564	NPTTFHLDGEVITFDNLKTLLSLRE	DQB1-0201_DQA1-0501;DRB1_1503;DRB1_0401;DRB1_0404;DRB1_0302;DRB1_0402;DRB1_1501;DRB3_0101	0.711283322	0.738469796	0.2927887
orf1ab polyprotein	1540	1564	NPTTFHLDGEVITFDNLKTLLSLRE	DQB1-0201_DQA1-0501;DRB1_1503;DRB1_0401;DRB1_0404;DRB1_0302;DRB1_0402;DRB1_1501;DRB3_0101	0.711283322	0.738469796	0.2927887
orf1ab polyprotein	6434	6458	WVYKQFDTYNLWNTFTRLQSLENVA	DRB1_1102;DQB1-0602_DQA1-0102;DRB5_0102;DRB1_1101;DRB1_1302;DRB5_0101;DRB1_0804;DRB1_1104;DRB1_0101;DRB1_1001;DRB1_0802	0.713325164	0.707034867	0.352754263
orf1ab polyprotein	6435	6459	VYKQFDTYNLWNTFTRLQSLENVAF	DRB1_1102;DQB1-0602_DQA1-0102;DRB5_0102;DRB1_1101;DRB1_1302;DRB5_0101;DRB1_0804;DRB1_1104;DRB1_0101;DRB1_1001;DRB1_0802	0.713325164	0.707034867	0.352754263
orf1a polyprotein	643	667	RDGWEIVKFISTCACEIVGGQIVTC	DQB1-0201_DQA1-0501;DRB1_1503;DQB1-0303_DQA1-0201;DPB1-1301_DPA1-0201;DPB1-0101_DPA1-0103;DRB1_0404;DRB1_0406;DRB1_0701;DRB1_0402;DQB1-0603_DQA1-0103;DQB1-0202_DQA1-0201	0.721603723	0.720311788	0.331626467
orf1ab polyprotein	643	667	RDGWEIVKFISTCACEIVGGQIVTC	DQB1-0201_DQA1-0501;DRB1_1503;DQB1-0303_DQA1-0201;DPB1-1301_DPA1-0201;DPB1-0101_DPA1-0103;DRB1_0404;DRB1_0406;DRB1_0701;DRB1_0402;DQB1-0603_DQA1-0103;DQB1-0202_DQA1-0201	0.721603723	0.720311788	0.331626467
orf1a polyprotein	644	668	DGWEIVKFISTCACEIVGGQIVTCA	DQB1-0201_DQA1-0501;DRB1_1503;DQB1-0303_DQA1-0201;DPB1-1301_DPA1-0201;DPB1-0101_DPA1-0103;DRB1_0404;DRB1_0406;DRB1_0701;DRB1_0402;DQB1-0603_DQA1-0103;DQB1-0202_DQA1-0201	0.721603723	0.720311788	0.331626467
orf1ab polyprotein	644	668	DGWEIVKFISTCACEIVGGQIVTCA	DQB1-0201_DQA1-0501;DRB1_1503;DQB1-0303_DQA1-0201;DPB1-1301_DPA1-0201;DPB1-0101_DPA1-0103;DRB1_0404;DRB1_0406;DRB1_0701;DRB1_0402;DQB1-0603_DQA1-0103;DQB1-0202_DQA1-0201	0.721603723	0.720311788	0.331626467
orf1ab polyprotein	1620	1644	VLPNDDTLRVEAFEYYHTTDPSFLG	DPB1-0401_DPA1-0103;DRB1_1502;DQB1-0202_DQA1-0201	0.756222256	0.753680565	0.223070437
orf1ab polyprotein	1619	1643	YVLPNDDTLRVEAFEYYHTTDPSFL	DPB1-0401_DPA1-0103;DRB1_1502;DQB1-0202_DQA1-0201	0.756222256	0.753680565	0.223070437
orf1a polyprotein	1620	1644	VLPNDDTLRVEAFEYYHTTDPSFLG	DPB1-0401_DPA1-0103;DRB1_1502;DQB1-0202_DQA1-0201	0.756222256	0.753680565	0.223070437
orf1a polyprotein	1619	1643	YVLPNDDTLRVEAFEYYHTTDPSFL	DPB1-0401_DPA1-0103;DRB1_1502;DQB1-0202_DQA1-0201	0.756222256	0.753680565	0.223070437
orf1ab polyprotein	2087	2111	TEEVGHTDLMAAYVDNSSLTIKKPN	DRB3_0202;DRB4_0103;DQB1-0501_DQA1-0101;DQB1-0502_DQA1-0102	0.760877044	0.760877044	0.211456
orf1a polyprotein	2087	2111	TEEVGHTDLMAAYVDNSSLTIKKPN	DRB3_0202;DRB4_0103;DQB1-0501_DQA1-0101;DQB1-0502_DQA1-0102	0.760877044	0.760877044	0.211456
orf1ab polyprotein	2089	2113	EVGHTDLMAAYVDNSSLTIKKPNEL	DRB3_0202;DRB4_0103;DQB1-0501_DQA1-0101;DQB1-0502_DQA1-0102	0.760877044	0.760877044	0.211456
orf1a polyprotein	2089	2113	EVGHTDLMAAYVDNSSLTIKKPNEL	DRB3_0202;DRB4_0103;DQB1-0501_DQA1-0101;DQB1-0502_DQA1-0102	0.760877044	0.760877044	0.211456
orf1ab polyprotein	2088	2112	EEVGHTDLMAAYVDNSSLTIKKPNE	DRB3_0202;DRB4_0103;DQB1-0501_DQA1-0101;DQB1-0502_DQA1-0102	0.760877044	0.760877044	0.211456
orf1a polyprotein	2088	2112	EEVGHTDLMAAYVDNSSLTIKKPNE	DRB3_0202;DRB4_0103;DQB1-0501_DQA1-0101;DQB1-0502_DQA1-0102	0.760877044	0.760877044	0.211456
orf1ab polyprotein	2090	2114	VGHTDLMAAYVDNSSLTIKKPNELS	DRB3_0202;DRB4_0103;DQB1-0501_DQA1-0101;DQB1-0502_DQA1-0102	0.760877044	0.760877044	0.211456
orf1a polyprotein	2090	2114	VGHTDLMAAYVDNSSLTIKKPNELS	DRB3_0202;DRB4_0103;DQB1-0501_DQA1-0101;DQB1-0502_DQA1-0102	0.760877044	0.760877044	0.211456
orf1ab polyprotein	5908	5932	KLQFTSLEIPRRNVATLQAENVTGL	DPB1-0101_DPA1-0202;DQB1-0201_DQA1-0501;DQB1-0303_DQA1-0201;DPB1-0101_DPA1-0103;DQB1-0302_DQA1-0301;DQB1-0201_DQA1-0201;DRB1_1201;DPB1-0301_DPA1-0103;DQB1-0202_DQA1-0201	0.707213668	0.700112976	0.382737814
orf1ab polyprotein	5289	5313	GHMLDMYSVMLTNDNTSRYWEPEFY	DRB1_0301;DRB1_0403;DPB1-0501_DPA1-0202;DRB1_0404;DRB1_0405;DRB3_0101;DRB1_1001	0.553911758	0.564891289	0.748802489
orf1ab polyprotein	5287	5311	LTGHMLDMYSVMLTNDNTSRYWEPE	DRB1_0301;DRB1_0403;DPB1-0501_DPA1-0202;DRB1_0404;DRB1_0405;DRB3_0101;DRB1_1001	0.553911758	0.564891289	0.748802489
orf1ab polyprotein	5288	5312	TGHMLDMYSVMLTNDNTSRYWEPEF	DRB1_0301;DRB1_0403;DPB1-0501_DPA1-0202;DRB1_0404;DRB1_0405;DRB3_0101;DRB1_1001	0.553911758	0.564891289	0.748802489
orf1a polyprotein	1832	1856	QCGHYKHITSKETLYCIDGALLTKS	DRB1_1602;DRB1_1502;DRB1_1601;DRB1_0407;DRB1_0405;DRB1_0804;DRB1_0402;DRB1_0701;DRB1_1404;DRB3_0101;DRB1_0101;DRB1_0801	0.658473925	0.667221003	0.507280236
orf1ab polyprotein	1832	1856	QCGHYKHITSKETLYCIDGALLTKS	DRB1_1602;DRB1_1502;DRB1_1601;DRB1_0407;DRB1_0405;DRB1_0804;DRB1_0402;DRB1_0701;DRB1_1404;DRB3_0101;DRB1_0101;DRB1_0801	0.658473925	0.667221003	0.507280236
orf1a polyprotein	1831	1855	YQCGHYKHITSKETLYCIDGALLTK	DRB1_1602;DRB1_1502;DRB1_1601;DRB1_0407;DRB1_0405;DRB1_0804;DRB1_0402;DRB1_0701;DRB1_1404;DRB3_0101;DRB1_0101;DRB1_0801	0.658473925	0.667221003	0.507280236
orf1ab polyprotein	1831	1855	YQCGHYKHITSKETLYCIDGALLTK	DRB1_1602;DRB1_1502;DRB1_1601;DRB1_0407;DRB1_0405;DRB1_0804;DRB1_0402;DRB1_0701;DRB1_1404;DRB3_0101;DRB1_0101;DRB1_0801	0.658473925	0.667221003	0.507280236
orf1ab polyprotein	1830	1854	NYQCGHYKHITSKETLYCIDGALLT	DRB1_1602;DRB1_1502;DRB1_1601;DRB1_0407;DRB1_0405;DRB1_0804;DRB1_0402;DRB1_0701;DRB1_1404;DRB3_0101;DRB1_0101;DRB1_0801	0.658473925	0.667221003	0.507280236
orf1a polyprotein	1830	1854	NYQCGHYKHITSKETLYCIDGALLT	DRB1_1602;DRB1_1502;DRB1_1601;DRB1_0407;DRB1_0405;DRB1_0804;DRB1_0402;DRB1_0701;DRB1_1404;DRB3_0101;DRB1_0101;DRB1_0801	0.658473925	0.667221003	0.507280236
orf1ab polyprotein	4983	5007	TSKFYGGWHNMLKTVYSDVENPHLM	DPB1-0401_DPA1-0103;DRB1_1602;DQB1-0201_DQA1-0201;DRB1_0411;DRB1_1402;DQB1-0202_DQA1-0201	0.757952813	0.750452826	0.214223824
orf1a polyprotein	4264	4288	STVLSFCAFAVDAAKAYKDYLASGG	DPB1-0101_DPA1-0201;DQB1-0302_DQA1-0301;DRB1_0411;DPB1-0501_DPA1-0201;DRB1_1501;DRB3_0101;DQB1-0301_DQA1-0505	0.700564134	0.719975488	0.340943533
orf1ab polyprotein	4264	4288	STVLSFCAFAVDAAKAYKDYLASGG	DPB1-0101_DPA1-0201;DQB1-0302_DQA1-0301;DRB1_0411;DPB1-0501_DPA1-0201;DRB1_1501;DRB3_0101;DQB1-0301_DQA1-0505	0.700564134	0.719975488	0.340943533
orf1a polyprotein	3969	3993	ANGDSEVVLKKLKKSLNVAKSEFDR	DRB1_0410;DRB1_1102;DRB1_1301;DQB1-0302_DQA1-0301;DRB1_0901;DRB1_0411;DRB1_1302;DQB1-0303_DQA1-0301;DRB1_1104;DPB1-0201_DPA1-0103	0.552841646	0.540983097	0.722399924
orf1ab polyprotein	3969	3993	ANGDSEVVLKKLKKSLNVAKSEFDR	DRB1_0410;DRB1_1102;DRB1_1301;DQB1-0302_DQA1-0301;DRB1_0901;DRB1_0411;DRB1_1302;DQB1-0303_DQA1-0301;DRB1_1104;DPB1-0201_DPA1-0103	0.552841646	0.540983097	0.722399924
orf1a polyprotein	3970	3994	NGDSEVVLKKLKKSLNVAKSEFDRD	DRB1_0410;DRB1_1102;DRB1_1301;DQB1-0302_DQA1-0301;DRB1_0901;DRB1_0411;DRB1_1302;DQB1-0303_DQA1-0301;DRB1_1104;DPB1-0201_DPA1-0103	0.552841646	0.540983097	0.722399924
orf1ab polyprotein	3970	3994	NGDSEVVLKKLKKSLNVAKSEFDRD	DRB1_0410;DRB1_1102;DRB1_1301;DQB1-0302_DQA1-0301;DRB1_0901;DRB1_0411;DRB1_1302;DQB1-0303_DQA1-0301;DRB1_1104;DPB1-0201_DPA1-0103	0.552841646	0.540983097	0.722399924
surface glycoprotein	626	650	ADQLTPTWRVYSTGSNVFQTRAGCL	DQB1-0401_DQA1-0301;DPB1-1401_DPA1-0201;DRB1_1502;DQB1-0602_DQA1-0102;DRB1_1101;DRB1_0701;DQB1-0202_DQA1-0201;DPB1-0601_DPA1-0103	0.665192845	0.672334152	0.485228478
surface glycoprotein	627	651	DQLTPTWRVYSTGSNVFQTRAGCLI	DQB1-0401_DQA1-0301;DPB1-1401_DPA1-0201;DRB1_1502;DQB1-0602_DQA1-0102;DRB1_1101;DRB1_0701;DQB1-0202_DQA1-0201;DPB1-0601_DPA1-0103	0.665192845	0.672334152	0.485228478
orf1a polyprotein	3784	3808	CFLGYFCTCYFGLFCLLNRYFRLTL	DPB1-0401_DPA1-0103;DQB1-0202_DQA1-0201;DRB1_1202;DRB1_1402;DRB1_1406	0.757036595	0.749847788	0.216853568
orf1a polyprotein	3783	3807	YCFLGYFCTCYFGLFCLLNRYFRLT	DPB1-0401_DPA1-0103;DQB1-0202_DQA1-0201;DRB1_1202;DRB1_1402;DRB1_1406	0.757036595	0.749847788	0.216853568
orf1ab polyprotein	3783	3807	YCFLGYFCTCYFGLFCLLNRYFRLT	DPB1-0401_DPA1-0103;DQB1-0202_DQA1-0201;DRB1_1202;DRB1_1402;DRB1_1406	0.757036595	0.749847788	0.216853568
orf1a polyprotein	3785	3809	FLGYFCTCYFGLFCLLNRYFRLTLG	DPB1-0401_DPA1-0103;DPB1-0202_DPA1-0103;DRB1_1202;DRB1_1402;DRB1_1406;DQB1-0202_DQA1-0201	0.757036595	0.749847788	0.216853568
orf1a polyprotein	3786	3810	LGYFCTCYFGLFCLLNRYFRLTLGV	DPB1-0401_DPA1-0103;DPB1-0202_DPA1-0103;DRB1_1202;DRB1_1402;DRB1_1406;DQB1-0202_DQA1-0201	0.757036595	0.749847788	0.216853568
orf1ab polyprotein	3784	3808	CFLGYFCTCYFGLFCLLNRYFRLTL	DPB1-0401_DPA1-0103;DQB1-0202_DQA1-0201;DRB1_1202;DRB1_1402;DRB1_1406	0.757036595	0.749847788	0.216853568
orf1ab polyprotein	3786	3810	LGYFCTCYFGLFCLLNRYFRLTLGV	DPB1-0401_DPA1-0103;DPB1-0202_DPA1-0103;DRB1_1202;DRB1_1402;DRB1_1406;DQB1-0202_DQA1-0201	0.757036595	0.749847788	0.216853568
orf1ab polyprotein	3785	3809	FLGYFCTCYFGLFCLLNRYFRLTLG	DPB1-0401_DPA1-0103;DPB1-0202_DPA1-0103;DRB1_1202;DRB1_1402;DRB1_1406;DQB1-0202_DQA1-0201	0.757036595	0.749847788	0.216853568
orf1ab polyprotein	5726	5750	PAQLPAPRTLLTKGTLEPEYFNSVC	DPB1-0401_DPA1-0103;DQB1-0303_DQA1-0201;DQB1-0202_DQA1-0201;DRB1_0804	0.774385391	0.770559335	0.080319
orf1ab polyprotein	5441	5465	AGDYILANTCTERLKLFAAETLKAT	DRB3_0202;DQB1-0501_DQA1-0101;DRB5_0101;DRB3_0201;DRB1_1402;DRB1_0803;DRB1_0405;DRB1_1406;DQB1-0202_DQA1-0201	0.742139392	0.731752417	0.265556896
ORF3a protein	19	43	EIKDATPSDFVRATATIPIQASLPF	DQB1-0201_DQA1-0501;DQB1-0602_DQA1-0102;DRB1_0901;DRB1_0701;DRB1_1404;DRB3_0301;DRB1_1001	0.653846658	0.653717895	0.526327079
orf1ab polyprotein	660	684	VGGQIVTCAKEIKESVQTFFKLVNK	DPB1-1001_DPA1-0201;DRB1_1102;DRB1_1301;DRB1_0301;DRB1_0901;DPB1-1701_DPA1-0201;DRB1_0406;DRB1_1405;DRB1_0302;DPB1-1101_DPA1-0201;DRB1_0701;DPB1-0901_DPA1-0201;DRB1_1406	0.60278151	0.615271007	0.614428425
orf1a polyprotein	660	684	VGGQIVTCAKEIKESVQTFFKLVNK	DPB1-1001_DPA1-0201;DRB1_1102;DRB1_1301;DRB1_0301;DRB1_0901;DPB1-1701_DPA1-0201;DRB1_0406;DRB1_1405;DRB1_0302;DPB1-1101_DPA1-0201;DRB1_0701;DPB1-0901_DPA1-0201;DRB1_1406	0.60278151	0.615271007	0.614428425
orf1ab polyprotein	3116	3140	LTNDVSFLAHIQWMVMFTPLVPFWI	DPB1-0401_DPA1-0103;DRB1_0401;DRB1_1202;DRB1_1201;DRB1_0804	0.737316472	0.743354645	0.274791066
orf1a polyprotein	3117	3141	TNDVSFLAHIQWMVMFTPLVPFWIT	DPB1-0401_DPA1-0103;DRB1_0401;DRB1_1202;DRB1_1201;DRB1_0804	0.737316472	0.743354645	0.274791066
orf1ab polyprotein	3114	3138	FYLTNDVSFLAHIQWMVMFTPLVPF	DPB1-0401_DPA1-0103;DRB1_0401;DRB1_1202;DRB1_1201;DRB1_0804	0.737316472	0.743354645	0.274791066
orf1ab polyprotein	3117	3141	TNDVSFLAHIQWMVMFTPLVPFWIT	DPB1-0401_DPA1-0103;DRB1_0401;DRB1_1202;DRB1_1201;DRB1_0804	0.737316472	0.743354645	0.274791066
orf1a polyprotein	3115	3139	YLTNDVSFLAHIQWMVMFTPLVPFW	DPB1-0401_DPA1-0103;DRB1_0401;DRB1_1202;DRB1_1201;DRB1_0804	0.737316472	0.743354645	0.274791066
orf1a polyprotein	3114	3138	FYLTNDVSFLAHIQWMVMFTPLVPF	DPB1-0401_DPA1-0103;DRB1_0401;DRB1_1202;DRB1_1201;DRB1_0804	0.737316472	0.743354645	0.274791066
orf1ab polyprotein	3115	3139	YLTNDVSFLAHIQWMVMFTPLVPFW	DPB1-0401_DPA1-0103;DRB1_0401;DRB1_1202;DRB1_1201;DRB1_0804	0.737316472	0.743354645	0.274791066
orf1a polyprotein	3116	3140	LTNDVSFLAHIQWMVMFTPLVPFWI	DPB1-0401_DPA1-0103;DRB1_0401;DRB1_1202;DRB1_1201;DRB1_0804	0.737316472	0.743354645	0.274791066
surface glycoprotein	1172	1196	INASVVNIQKEIDRLNEVAKNLNES	DPB1-1001_DPA1-0201;DPB1-1401_DPA1-0201;DQB1-0502_DQA1-0102;DQB1-0302_DQA1-0301;DPB1-0501_DPA1-0202;DPB1-1701_DPA1-0201;DPB1-0301_DPA1-0103;DRB1_0803;DPB1-0901_DPA1-0201	0.450396971	0.446753959	0.832880962
surface glycoprotein	1171	1195	GINASVVNIQKEIDRLNEVAKNLNE	DPB1-1001_DPA1-0201;DPB1-1401_DPA1-0201;DQB1-0502_DQA1-0102;DQB1-0302_DQA1-0301;DPB1-0501_DPA1-0202;DPB1-1701_DPA1-0201;DPB1-0301_DPA1-0103;DRB1_0803;DPB1-0901_DPA1-0201	0.450396971	0.446753959	0.832880962
surface glycoprotein	1067	1091	YVPAQEKNFTTAPAICHDGKAHFPR	DPB1-1001_DPA1-0201;DQB1-0201_DQA1-0501;DPB1-1401_DPA1-0201;DQB1-0303_DQA1-0201;DRB1_0301;DRB1_0901;DPB1-1701_DPA1-0201;DPB1-0301_DPA1-0103;DRB1_1401;DPB1-0901_DPA1-0201	0.635583164	0.648614902	0.532906108
surface glycoprotein	1068	1092	VPAQEKNFTTAPAICHDGKAHFPRE	DPB1-1001_DPA1-0201;DQB1-0201_DQA1-0501;DPB1-1401_DPA1-0201;DQB1-0303_DQA1-0201;DRB1_0301;DRB1_0901;DPB1-1701_DPA1-0201;DPB1-0301_DPA1-0103;DRB1_1401;DPB1-0901_DPA1-0201	0.635583164	0.648614902	0.532906108
orf1a polyprotein	3748	3772	VTTVMFLARGIVFMCVEYCPIFFIT	DPB1-0101_DPA1-0103;DPB1-0401_DPA1-0103;DRB1_0404;DQB1-0301_DQA1-0505	0.765366801	0.766615779	0.096889902
orf1ab polyprotein	3749	3773	TTVMFLARGIVFMCVEYCPIFFITG	DPB1-0101_DPA1-0103;DPB1-0401_DPA1-0103;DRB1_0404;DQB1-0301_DQA1-0505	0.765366801	0.766615779	0.096889902
orf1ab polyprotein	3748	3772	VTTVMFLARGIVFMCVEYCPIFFIT	DPB1-0101_DPA1-0103;DPB1-0401_DPA1-0103;DRB1_0404;DQB1-0301_DQA1-0505	0.765366801	0.766615779	0.096889902
orf1a polyprotein	3751	3775	VMFLARGIVFMCVEYCPIFFITGNT	DPB1-0101_DPA1-0103;DPB1-0401_DPA1-0103;DRB1_0404;DQB1-0301_DQA1-0505	0.765366801	0.766615779	0.096889902
orf1ab polyprotein	3747	3771	VVTTVMFLARGIVFMCVEYCPIFFI	DPB1-0101_DPA1-0103;DPB1-0401_DPA1-0103;DRB1_0404;DQB1-0301_DQA1-0505	0.765366801	0.766615779	0.096889902
orf1ab polyprotein	3751	3775	VMFLARGIVFMCVEYCPIFFITGNT	DPB1-0101_DPA1-0103;DPB1-0401_DPA1-0103;DRB1_0404;DQB1-0301_DQA1-0505	0.765366801	0.766615779	0.096889902
orf1a polyprotein	3746	3770	GVVTTVMFLARGIVFMCVEYCPIFF	DPB1-0101_DPA1-0103;DPB1-0401_DPA1-0103;DRB1_0404;DQB1-0301_DQA1-0505	0.765366801	0.766615779	0.096889902
orf1ab polyprotein	3750	3774	TVMFLARGIVFMCVEYCPIFFITGN	DPB1-0101_DPA1-0103;DPB1-0401_DPA1-0103;DRB1_0404;DQB1-0301_DQA1-0505	0.765366801	0.766615779	0.096889902
orf1ab polyprotein	3746	3770	GVVTTVMFLARGIVFMCVEYCPIFF	DPB1-0101_DPA1-0103;DPB1-0401_DPA1-0103;DRB1_0404;DQB1-0301_DQA1-0505	0.765366801	0.766615779	0.096889902
orf1a polyprotein	3749	3773	TTVMFLARGIVFMCVEYCPIFFITG	DPB1-0101_DPA1-0103;DPB1-0401_DPA1-0103;DRB1_0404;DQB1-0301_DQA1-0505	0.765366801	0.766615779	0.096889902
orf1a polyprotein	3747	3771	VVTTVMFLARGIVFMCVEYCPIFFI	DPB1-0101_DPA1-0103;DPB1-0401_DPA1-0103;DRB1_0404;DQB1-0301_DQA1-0505	0.765366801	0.766615779	0.096889902
orf1a polyprotein	3750	3774	TVMFLARGIVFMCVEYCPIFFITGN	DPB1-0101_DPA1-0103;DPB1-0401_DPA1-0103;DRB1_0404;DQB1-0301_DQA1-0505	0.765366801	0.766615779	0.096889902
surface glycoprotein	840	864	CLGDIAARDLICAQKFNGLTVLPPL	DPB1-0401_DPA1-0103;DPB1-1001_DPA1-0201;DPB1-1701_DPA1-0201;DRB1_1405;DRB1_0302;DRB1_0804;DPB1-0901_DPA1-0201	0.731407591	0.720510898	0.30424878
surface glycoprotein	839	863	DCLGDIAARDLICAQKFNGLTVLPP	DPB1-0401_DPA1-0103;DPB1-1001_DPA1-0201;DPB1-1701_DPA1-0201;DRB1_1405;DRB1_0302;DRB1_0804;DPB1-0901_DPA1-0201	0.731407591	0.720510898	0.30424878
orf1ab polyprotein	4982	5006	GTSKFYGGWHNMLKTVYSDVENPHL	DPB1-0401_DPA1-0103;DQB1-0201_DQA1-0201;DRB1_1402;DQB1-0202_DQA1-0201	0.751956368	0.749817767	0.182632509
orf1ab polyprotein	4981	5005	IGTSKFYGGWHNMLKTVYSDVENPH	DPB1-0401_DPA1-0103;DQB1-0201_DQA1-0201;DRB1_1402;DQB1-0202_DQA1-0201	0.751956368	0.749817767	0.182632509
orf1ab polyprotein	4714	4738	PPTSFGPLVRKIFVDGVPFVVSTGY	DRB1_0301;DRB1_1302;DRB3_0301;DRB3_0101;DPB1-0201_DPA1-0103	0.662734617	0.678420586	0.459280144
orf1a polyprotein	4240	4264	GMVLGSLAATVRLQAGNATEVPANS	DRB1_1102;DRB1_1301;DQB1-0602_DQA1-0102;DRB1_1101;DRB1_1405;DRB4_0103;DRB1_1104	0.723713011	0.726521594	0.245563086
orf1ab polyprotein	4239	4263	RGMVLGSLAATVRLQAGNATEVPAN	DRB1_1102;DRB1_1301;DQB1-0602_DQA1-0102;DRB1_1101;DRB1_1405;DRB4_0103;DRB1_1104	0.723713011	0.726521594	0.245563086
orf1a polyprotein	4239	4263	RGMVLGSLAATVRLQAGNATEVPAN	DRB1_1102;DRB1_1301;DQB1-0602_DQA1-0102;DRB1_1101;DRB1_1405;DRB4_0103;DRB1_1104	0.723713011	0.726521594	0.245563086
orf1ab polyprotein	4240	4264	GMVLGSLAATVRLQAGNATEVPANS	DRB1_1102;DRB1_1301;DQB1-0602_DQA1-0102;DRB1_1101;DRB1_1405;DRB4_0103;DRB1_1104	0.723713011	0.726521594	0.245563086
orf1ab polyprotein	672	696	KESVQTFFKLVNKFLALCADSIIIG	DQB1-0201_DQA1-0501;DRB1_1102;DPB1-0101_DPA1-0201;DRB1_1502;DRB1_1602;DRB1_1601;DRB1_1101;DRB1_1303;DRB1_0803;DRB1_0804;DRB1_1401;DRB1_1104;DRB1_0101;DRB1_1001;DRB1_0802	0.627519391	0.607317406	0.578016306
orf1a polyprotein	672	696	KESVQTFFKLVNKFLALCADSIIIG	DQB1-0201_DQA1-0501;DRB1_1102;DPB1-0101_DPA1-0201;DRB1_1502;DRB1_1602;DRB1_1601;DRB1_1101;DRB1_1303;DRB1_0803;DRB1_0804;DRB1_1401;DRB1_1104;DRB1_0101;DRB1_1001;DRB1_0802	0.627519391	0.607317406	0.578016306
orf1a polyprotein	3757	3781	GIVFMCVEYCPIFFITGNTLQCIML	DPB1-0401_DPA1-0103;DRB1_0407;DRB1_0101;DRB3_0301	0.75344207	0.760935804	0.132601259
orf1ab polyprotein	3756	3780	RGIVFMCVEYCPIFFITGNTLQCIM	DPB1-0401_DPA1-0103;DRB1_0407;DRB1_0101;DRB3_0301	0.75344207	0.760935804	0.132601259
orf1a polyprotein	3756	3780	RGIVFMCVEYCPIFFITGNTLQCIM	DPB1-0401_DPA1-0103;DRB1_0407;DRB1_0101;DRB3_0301	0.75344207	0.760935804	0.132601259
orf1ab polyprotein	3757	3781	GIVFMCVEYCPIFFITGNTLQCIML	DPB1-0401_DPA1-0103;DRB1_0407;DRB1_0101;DRB3_0301	0.75344207	0.760935804	0.132601259
surface glycoprotein	842	866	GDIAARDLICAQKFNGLTVLPPLLT	DPB1-0401_DPA1-0103;DPB1-1001_DPA1-0201;DPB1-1701_DPA1-0201;DRB1_1405;DRB1_0804;DPB1-0901_DPA1-0201	0.725823928	0.720477326	0.30424878
surface glycoprotein	841	865	LGDIAARDLICAQKFNGLTVLPPLL	DPB1-0401_DPA1-0103;DPB1-1001_DPA1-0201;DPB1-1701_DPA1-0201;DRB1_1405;DRB1_0804;DPB1-0901_DPA1-0201	0.725823928	0.720477326	0.30424878
surface glycoprotein	843	867	DIAARDLICAQKFNGLTVLPPLLTD	DPB1-0401_DPA1-0103;DPB1-1001_DPA1-0201;DPB1-1701_DPA1-0201;DRB1_1405;DRB1_0804;DPB1-0901_DPA1-0201	0.725823928	0.720477326	0.30424878
orf1a polyprotein	2149	2173	VVSTTTNIVTRCLNRVCTNYMPYFF	DPB1-0202_DPA1-0103;DPB1-0101_DPA1-0103;DRB1_0403;DPB1-0501_DPA1-0201;DPB1-0402_DPA1-0103;DPB1-0901_DPA1-0201;DPB1-0201_DPA1-0103;DQB1-0202_DQA1-0201	0.564333148	0.56094848	0.690721648
orf1ab polyprotein	2150	2174	VSTTTNIVTRCLNRVCTNYMPYFFT	DPB1-0202_DPA1-0103;DPB1-0101_DPA1-0103;DRB1_0403;DPB1-0501_DPA1-0201;DPB1-0402_DPA1-0103;DPB1-0901_DPA1-0201;DPB1-0201_DPA1-0103;DQB1-0202_DQA1-0201	0.564333148	0.56094848	0.690721648
orf1a polyprotein	2150	2174	VSTTTNIVTRCLNRVCTNYMPYFFT	DPB1-0202_DPA1-0103;DPB1-0101_DPA1-0103;DRB1_0403;DPB1-0501_DPA1-0201;DPB1-0402_DPA1-0103;DPB1-0901_DPA1-0201;DPB1-0201_DPA1-0103;DQB1-0202_DQA1-0201	0.564333148	0.56094848	0.690721648
orf1ab polyprotein	2149	2173	VVSTTTNIVTRCLNRVCTNYMPYFF	DPB1-0202_DPA1-0103;DPB1-0101_DPA1-0103;DRB1_0403;DPB1-0501_DPA1-0201;DPB1-0402_DPA1-0103;DPB1-0901_DPA1-0201;DPB1-0201_DPA1-0103;DQB1-0202_DQA1-0201	0.564333148	0.56094848	0.690721648
orf1ab polyprotein	2148	2172	KVVSTTTNIVTRCLNRVCTNYMPYF	DPB1-0202_DPA1-0103;DPB1-0101_DPA1-0103;DRB1_0403;DPB1-0501_DPA1-0201;DPB1-0402_DPA1-0103;DPB1-0901_DPA1-0201;DPB1-0201_DPA1-0103;DQB1-0202_DQA1-0201	0.564333148	0.56094848	0.690721648
orf1a polyprotein	2148	2172	KVVSTTTNIVTRCLNRVCTNYMPYF	DPB1-0202_DPA1-0103;DPB1-0101_DPA1-0103;DRB1_0403;DPB1-0501_DPA1-0201;DPB1-0402_DPA1-0103;DPB1-0901_DPA1-0201;DPB1-0201_DPA1-0103;DQB1-0202_DQA1-0201	0.564333148	0.56094848	0.690721648
orf1a polyprotein	4178	4202	GRFVLALLSDLQDLKWARFPKSDGT	DPB1-0401_DPA1-0103;DQB1-0601_DQA1-0102;DQB1-0502_DQA1-0102;DRB1_1202;DRB1_1201	0.700960385	0.695219077	0.441130938
orf1ab polyprotein	4178	4202	GRFVLALLSDLQDLKWARFPKSDGT	DPB1-0401_DPA1-0103;DQB1-0601_DQA1-0102;DQB1-0502_DQA1-0102;DRB1_1202;DRB1_1201	0.700960385	0.695219077	0.441130938
surface glycoprotein	165	189	NCTFEYVSQPFLMDLEGKQGNFKNL	DPB1-0101_DPA1-0201;DPB1-0101_DPA1-0103;DRB1_0102;DPB1-0402_DPA1-0103;DRB3_0101;DPB1-0201_DPA1-0103	0.666286563	0.663058766	0.455660958
surface glycoprotein	39	63	PDKVFRSSVLHSTQDLFLPFFSNVT	DQB1-0303_DQA1-0201;DQB1-0604_DQA1-0102;DPB1-0402_DPA1-0103;DPB1-0201_DPA1-0103;DQB1-0603_DQA1-0103;DQB1-0202_DQA1-0201	0.668559603	0.668559603	0.455356
orf1a polyprotein	1605	1629	TKIKPHNSHEGKTFYVLPNDDTLRV	DRB1_1602;DRB1_1502;DPB1-1301_DPA1-0201;DPB1-0202_DPA1-0103;DRB1_0404;DRB1_1601;DQB1-0501_DQA1-0101;DRB1_1001;DRB1_0405;DRB1_0101;DPB1-0201_DPA1-0103	0.577602922	0.582033897	0.646008415
orf1a polyprotein	1607	1631	IKPHNSHEGKTFYVLPNDDTLRVEA	DRB1_1602;DRB1_1502;DPB1-1301_DPA1-0201;DPB1-0202_DPA1-0103;DRB1_0404;DRB1_1601;DQB1-0501_DQA1-0101;DRB1_1001;DRB1_0405;DRB1_0101;DPB1-0201_DPA1-0103	0.577602922	0.582033897	0.646008415
orf1ab polyprotein	1606	1630	KIKPHNSHEGKTFYVLPNDDTLRVE	DRB1_1602;DRB1_1502;DPB1-1301_DPA1-0201;DPB1-0202_DPA1-0103;DRB1_0404;DRB1_1601;DQB1-0501_DQA1-0101;DRB1_1001;DRB1_0405;DRB1_0101;DPB1-0201_DPA1-0103	0.577602922	0.582033897	0.646008415
orf1ab polyprotein	1605	1629	TKIKPHNSHEGKTFYVLPNDDTLRV	DRB1_1602;DRB1_1502;DPB1-1301_DPA1-0201;DPB1-0202_DPA1-0103;DRB1_0404;DRB1_1601;DQB1-0501_DQA1-0101;DRB1_1001;DRB1_0405;DRB1_0101;DPB1-0201_DPA1-0103	0.577602922	0.582033897	0.646008415
orf1ab polyprotein	1607	1631	IKPHNSHEGKTFYVLPNDDTLRVEA	DRB1_1602;DRB1_1502;DPB1-1301_DPA1-0201;DPB1-0202_DPA1-0103;DRB1_0404;DRB1_1601;DQB1-0501_DQA1-0101;DRB1_1001;DRB1_0405;DRB1_0101;DPB1-0201_DPA1-0103	0.577602922	0.582033897	0.646008415
orf1a polyprotein	1606	1630	KIKPHNSHEGKTFYVLPNDDTLRVE	DRB1_1602;DRB1_1502;DPB1-1301_DPA1-0201;DPB1-0202_DPA1-0103;DRB1_0404;DRB1_1601;DQB1-0501_DQA1-0101;DRB1_1001;DRB1_0405;DRB1_0101;DPB1-0201_DPA1-0103	0.577602922	0.582033897	0.646008415
orf1a polyprotein	533	557	LYAFASEAARVVRSIFSRTLETAQN	DQB1-0602_DQA1-0102;DRB1_1601;DQB1-0201_DQA1-0201;DPB1-0402_DPA1-0103;DRB1_1501;DQB1-0202_DQA1-0201	0.66678897	0.693384739	0.397084617
orf1ab polyprotein	533	557	LYAFASEAARVVRSIFSRTLETAQN	DQB1-0602_DQA1-0102;DRB1_1601;DQB1-0201_DQA1-0201;DPB1-0402_DPA1-0103;DRB1_1501;DQB1-0202_DQA1-0201	0.66678897	0.693384739	0.397084617
orf1ab polyprotein	5230	5254	LGAGCFVDDIVKTDGTLMIERFVSL	DRB1_0301;DQB1-0501_DQA1-0101;DRB1_1405;DRB1_0701;DRB1_1404;DRB3_0301;DQB1-0202_DQA1-0201	0.67552045	0.704479213	0.362759547
orf1ab polyprotein	5229	5253	ILGAGCFVDDIVKTDGTLMIERFVS	DRB1_0301;DQB1-0501_DQA1-0101;DRB1_1405;DRB1_0701;DRB1_1404;DRB3_0301;DQB1-0202_DQA1-0201	0.67552045	0.704479213	0.362759547
orf1ab polyprotein	4126	4150	LIVTALRANSAVKLQNNELSPVALR	DRB3_0202;DRB3_0201;DRB4_0103;DRB3_0301;DRB1_0101	0.771965785	0.782782829	0.054107595
orf1ab polyprotein	4127	4151	IVTALRANSAVKLQNNELSPVALRQ	DRB3_0202;DRB3_0201;DRB4_0103;DRB3_0301;DRB1_0101	0.771965785	0.782782829	0.054107595
orf1a polyprotein	4126	4150	LIVTALRANSAVKLQNNELSPVALR	DRB3_0202;DRB3_0201;DRB4_0103;DRB3_0301;DRB1_0101	0.771965785	0.782782829	0.054107595
orf1a polyprotein	4127	4151	IVTALRANSAVKLQNNELSPVALRQ	DRB3_0202;DRB3_0201;DRB4_0103;DRB3_0301;DRB1_0101	0.771965785	0.782782829	0.054107595
orf1ab polyprotein	2733	2757	AKKNNLPFKLTCATTRQVVNVVTTK	DRB1_0901;DRB5_0102;DRB5_0101;DPB1-0301_DPA1-0103;DRB1_0701;DRB1_0402;DQB1-0301_DQA1-0505	0.692132271	0.695851217	0.33984375
orf1a polyprotein	2733	2757	AKKNNLPFKLTCATTRQVVNVVTTK	DRB1_0901;DRB5_0102;DRB5_0101;DPB1-0301_DPA1-0103;DRB1_0701;DRB1_0402;DQB1-0301_DQA1-0505	0.692132271	0.695851217	0.33984375
orf1a polyprotein	2734	2758	KKNNLPFKLTCATTRQVVNVVTTKI	DRB1_0901;DRB5_0102;DRB5_0101;DPB1-0301_DPA1-0103;DRB1_0701;DRB1_0402;DQB1-0301_DQA1-0505	0.692132271	0.695851217	0.33984375
orf1ab polyprotein	2734	2758	KKNNLPFKLTCATTRQVVNVVTTKI	DRB1_0901;DRB5_0102;DRB5_0101;DPB1-0301_DPA1-0103;DRB1_0701;DRB1_0402;DQB1-0301_DQA1-0505	0.692132271	0.695851217	0.33984375
orf1a polyprotein	2866	2890	VPGLPGTILRTTNGDFLHFLPRVFS	DQB1-0201_DQA1-0501;DQB1-0401_DQA1-0301;DRB1_0403;DRB1_0406;DRB1_1401;DRB1_0701;DRB1_1404;DRB3_0301;DQB1-0202_DQA1-0201;DRB1_0801	0.647771527	0.662050298	0.468148815
orf1ab polyprotein	2866	2890	VPGLPGTILRTTNGDFLHFLPRVFS	DQB1-0201_DQA1-0501;DQB1-0401_DQA1-0301;DRB1_0403;DRB1_0406;DRB1_1401;DRB1_0701;DRB1_1404;DRB3_0301;DQB1-0202_DQA1-0201;DRB1_0801	0.647771527	0.662050298	0.468148815
orf1ab polyprotein	4021	4045	KRAKVTSAMQTMLFTMLRKLDNDAL	DPB1-0401_DPA1-0103;DRB1_1104;DRB1_1101;DRB1_0801	0.739687553	0.746436618	0.191186467
orf1a polyprotein	4021	4045	KRAKVTSAMQTMLFTMLRKLDNDAL	DPB1-0401_DPA1-0103;DRB1_1104;DRB1_1101;DRB1_0801	0.739687553	0.746436618	0.191186467
orf1ab polyprotein	2405	2429	NSSTCMMCYKRNRATRVECTTIVNG	DQB1-0602_DQA1-0102;DRB3_0202;DRB1_0701;DRB3_0301;DRB1_0101	0.696648449	0.723987729	0.262978025
orf1ab polyprotein	2406	2430	SSTCMMCYKRNRATRVECTTIVNGV	DQB1-0602_DQA1-0102;DRB3_0202;DRB1_0701;DRB3_0301;DRB1_0101	0.696648449	0.723987729	0.262978025
orf1a polyprotein	2406	2430	SSTCMMCYKRNRATRVECTTIVNGV	DQB1-0602_DQA1-0102;DRB3_0202;DRB1_0701;DRB3_0301;DRB1_0101	0.696648449	0.723987729	0.262978025
orf1a polyprotein	2405	2429	NSSTCMMCYKRNRATRVECTTIVNG	DQB1-0602_DQA1-0102;DRB3_0202;DRB1_0701;DRB3_0301;DRB1_0101	0.696648449	0.723987729	0.262978025
ORF3a protein	157	181	CIPYNSVTSSIVITSGDGTTSPISE	DQB1-0201_DQA1-0501;DRB1_1602;DQB1-0303_DQA1-0201;DQB1-0602_DQA1-0102;DQB1-0301_DQA1-0505;DQB1-0301_DQA1-0601	0.677939892	0.67364652	0.416606948
orf1ab polyprotein	2401	2425	VDGCNSSTCMMCYKRNRATRVECTT	DRB1_1301;DRB3_0202;DRB1_1302;DRB1_0701;DRB3_0301;DRB1_0101	0.681658709	0.718093478	0.31010364
orf1a polyprotein	2402	2426	DGCNSSTCMMCYKRNRATRVECTTI	DRB1_1301;DRB3_0202;DRB1_1302;DRB1_0701;DRB3_0301;DRB1_0101	0.681658709	0.718093478	0.31010364
orf1a polyprotein	2401	2425	VDGCNSSTCMMCYKRNRATRVECTT	DRB1_1301;DRB3_0202;DRB1_1302;DRB1_0701;DRB3_0301;DRB1_0101	0.681658709	0.718093478	0.31010364
orf1ab polyprotein	2402	2426	DGCNSSTCMMCYKRNRATRVECTTI	DRB1_1301;DRB3_0202;DRB1_1302;DRB1_0701;DRB3_0301;DRB1_0101	0.681658709	0.718093478	0.31010364
orf1a polyprotein	3754	3778	LARGIVFMCVEYCPIFFITGNTLQC	DPB1-0101_DPA1-0103;DPB1-0401_DPA1-0103;DRB1_0101;DRB1_0404	0.741183059	0.755363315	0.146195023
orf1a polyprotein	3753	3777	FLARGIVFMCVEYCPIFFITGNTLQ	DPB1-0101_DPA1-0103;DPB1-0401_DPA1-0103;DRB1_0101;DRB1_0404	0.741183059	0.755363315	0.146195023
orf1ab polyprotein	3754	3778	LARGIVFMCVEYCPIFFITGNTLQC	DPB1-0101_DPA1-0103;DPB1-0401_DPA1-0103;DRB1_0101;DRB1_0404	0.741183059	0.755363315	0.146195023
orf1ab polyprotein	3753	3777	FLARGIVFMCVEYCPIFFITGNTLQ	DPB1-0101_DPA1-0103;DPB1-0401_DPA1-0103;DRB1_0101;DRB1_0404	0.741183059	0.755363315	0.146195023
orf1ab polyprotein	676	700	QTFFKLVNKFLALCADSIIIGGAKL	DQB1-0201_DQA1-0501;DRB1_1602;DRB1_1502;DRB1_1601;DQB1-0604_DQA1-0102;DRB1_1401;DRB1_0701;DRB1_0101;DRB1_1001	0.613847812	0.640720139	0.527045823
orf1a polyprotein	676	700	QTFFKLVNKFLALCADSIIIGGAKL	DQB1-0201_DQA1-0501;DRB1_1602;DRB1_1502;DRB1_1601;DQB1-0604_DQA1-0102;DRB1_1401;DRB1_0701;DRB1_0101;DRB1_1001	0.613847812	0.640720139	0.527045823
orf1ab polyprotein	5774	5798	DTVSALVYDNKLKAHKDKSAQCFKM	DRB1_0301;DQB1-0302_DQA1-0301;DRB1_1101;DQB1-0501_DQA1-0101;DRB1_0302;DQB1-0303_DQA1-0301;DRB1_0402;DRB1_1104	0.604831626	0.622423376	0.559535494
orf1ab polyprotein	2411	2435	MCYKRNRATRVECTTIVNGVRRSFY	DQB1-0602_DQA1-0102;DQB1-0303_DQA1-0201;DRB3_0202;DRB1_0701;DRB1_0101	0.692583102	0.720288767	0.262978025
orf1a polyprotein	2410	2434	MMCYKRNRATRVECTTIVNGVRRSF	DQB1-0602_DQA1-0102;DQB1-0303_DQA1-0201;DRB3_0202;DRB1_0701;DRB1_0101	0.692583102	0.720288767	0.262978025
orf1a polyprotein	2409	2433	CMMCYKRNRATRVECTTIVNGVRRS	DQB1-0602_DQA1-0102;DQB1-0303_DQA1-0201;DRB3_0202;DRB1_0701;DRB1_0101	0.692583102	0.720288767	0.262978025
orf1ab polyprotein	2407	2431	STCMMCYKRNRATRVECTTIVNGVR	DQB1-0602_DQA1-0102;DQB1-0303_DQA1-0201;DRB3_0202;DRB1_0701;DRB1_0101	0.692583102	0.720288767	0.262978025
orf1a polyprotein	2407	2431	STCMMCYKRNRATRVECTTIVNGVR	DQB1-0602_DQA1-0102;DQB1-0303_DQA1-0201;DRB3_0202;DRB1_0701;DRB1_0101	0.692583102	0.720288767	0.262978025
orf1a polyprotein	2411	2435	MCYKRNRATRVECTTIVNGVRRSFY	DQB1-0602_DQA1-0102;DQB1-0303_DQA1-0201;DRB3_0202;DRB1_0701;DRB1_0101	0.692583102	0.720288767	0.262978025
orf1ab polyprotein	2410	2434	MMCYKRNRATRVECTTIVNGVRRSF	DQB1-0602_DQA1-0102;DQB1-0303_DQA1-0201;DRB3_0202;DRB1_0701;DRB1_0101	0.692583102	0.720288767	0.262978025
orf1ab polyprotein	2409	2433	CMMCYKRNRATRVECTTIVNGVRRS	DQB1-0602_DQA1-0102;DQB1-0303_DQA1-0201;DRB3_0202;DRB1_0701;DRB1_0101	0.692583102	0.720288767	0.262978025
orf1a polyprotein	2408	2432	TCMMCYKRNRATRVECTTIVNGVRR	DQB1-0602_DQA1-0102;DQB1-0303_DQA1-0201;DRB3_0202;DRB1_0701;DRB1_0101	0.692583102	0.720288767	0.262978025
orf1ab polyprotein	2408	2432	TCMMCYKRNRATRVECTTIVNGVRR	DQB1-0602_DQA1-0102;DQB1-0303_DQA1-0201;DRB3_0202;DRB1_0701;DRB1_0101	0.692583102	0.720288767	0.262978025
orf1ab polyprotein	5623	5647	YPSARIVYTACSHAAVDALCEKALK	DRB1_1503;DQB1-0303_DQA1-0201;DQB1-0602_DQA1-0102;DQB1-0302_DQA1-0301;DRB1_0403;DRB1_0404;DRB1_1202;DQB1-0604_DQA1-0102;DQB1-0601_DQA1-0103;DRB1_0102;DRB1_0402;DRB1_1104;DPB1-0601_DPA1-0103	0.653775856	0.635511812	0.48081735
orf1ab polyprotein	6064	6088	KPPPGDQFKHLIPLMYKGLPWNVVR	DRB5_0102;DRB1_1101;DRB1_1202;DRB1_1406;DRB5_0101;DRB1_1201;DRB1_1402;DRB1_0803;DRB1_0101;DRB1_1001;DQB1-0301_DQA1-0505;DRB1_0802	0.655104974	0.639411909	0.482391698
ORF9b protein	11	35	ALRLVDPQIQLAVTRMENAVGRDQN	DQB1-0602_DQA1-0102;DPB1-0402_DPA1-0103;DRB1_0403;DRB1_0402;DRB1_0405;DRB1_0901;DRB1_0411;DRB1_0404;DQB1-0302_DQA1-0301;DRB1_0410	0.620893759	0.600965825	0.565324259
ORF9b protein	13	37	RLVDPQIQLAVTRMENAVGRDQNNV	DQB1-0602_DQA1-0102;DPB1-0402_DPA1-0103;DRB1_0403;DRB1_0402;DRB1_0405;DRB1_0901;DRB1_0411;DRB1_0404;DQB1-0302_DQA1-0301;DRB1_0410	0.620893759	0.600965825	0.565324259
ORF9b protein	12	36	LRLVDPQIQLAVTRMENAVGRDQNN	DQB1-0602_DQA1-0102;DPB1-0402_DPA1-0103;DRB1_0403;DRB1_0402;DRB1_0405;DRB1_0901;DRB1_0411;DRB1_0404;DQB1-0302_DQA1-0301;DRB1_0410	0.620893759	0.600965825	0.565324259
ORF9b protein	10	34	PALRLVDPQIQLAVTRMENAVGRDQ	DQB1-0602_DQA1-0102;DPB1-0402_DPA1-0103;DRB1_0403;DRB1_0402;DRB1_0405;DRB1_0901;DRB1_0411;DRB1_0404;DQB1-0302_DQA1-0301;DRB1_0410	0.620893759	0.600965825	0.565324259
ORF9b protein	14	38	LVDPQIQLAVTRMENAVGRDQNNVG	DQB1-0602_DQA1-0102;DPB1-0402_DPA1-0103;DRB1_0403;DRB1_0402;DRB1_0405;DRB1_0901;DRB1_0411;DRB1_0404;DQB1-0302_DQA1-0301;DRB1_0410	0.620893759	0.600965825	0.565324259
orf1ab polyprotein	5775	5799	TVSALVYDNKLKAHKDKSAQCFKMF	DRB1_0301;DQB1-0302_DQA1-0301;DRB1_1101;DQB1-0501_DQA1-0101;DQB1-0303_DQA1-0301;DRB1_0402;DRB1_1104	0.594640249	0.622364731	0.559535494
ORF9b protein	15	39	VDPQIQLAVTRMENAVGRDQNNVGP	DQB1-0602_DQA1-0102;DPB1-0402_DPA1-0103;DRB1_0403;DRB1_0402;DRB1_0405;DRB1_0901;DRB1_0411;DRB1_0404;DQB1-0302_DQA1-0301	0.619922214	0.600965825	0.565324259
orf1ab polyprotein	5290	5314	HMLDMYSVMLTNDNTSRYWEPEFYE	DRB1_0301;DRB1_0403;DPB1-0501_DPA1-0202;DRB1_0404;DRB3_0101;DRB1_1001	0.542080211	0.560961984	0.711725762
orf1ab polyprotein	5291	5315	MLDMYSVMLTNDNTSRYWEPEFYEA	DRB1_0301;DRB1_0403;DPB1-0501_DPA1-0202;DRB1_0404;DRB3_0101;DRB1_1001	0.542080211	0.560961984	0.711725762
orf1ab polyprotein	3943	3967	AIASEFSSLPSYAAFATAQEAYEQA	DRB1_0410;DRB1_1502;DQB1-0502_DQA1-0102;DQB1-0302_DQA1-0301;DRB1_0404;DRB1_1601;DRB1_0405;DRB1_0402;DQB1-0301_DQA1-0505;DQB1-0202_DQA1-0201;DRB1_0801	0.644610435	0.643041541	0.483390215
orf1a polyprotein	3943	3967	AIASEFSSLPSYAAFATAQEAYEQA	DRB1_0410;DRB1_1502;DQB1-0502_DQA1-0102;DQB1-0302_DQA1-0301;DRB1_0404;DRB1_1601;DRB1_0405;DRB1_0402;DQB1-0301_DQA1-0505;DQB1-0202_DQA1-0201;DRB1_0801	0.644610435	0.643041541	0.483390215
surface glycoprotein	135	159	FCNDPFLGVYYHKNNKSWMESEFRV	DQB1-0502_DQA1-0102;DPB1-0202_DPA1-0103;DQB1-0302_DQA1-0301;DRB1_0404;DPB1-0402_DPA1-0103;DRB1_0402;DPB1-0201_DPA1-0103	0.576755053	0.578964503	0.614642519
surface glycoprotein	137	161	NDPFLGVYYHKNNKSWMESEFRVYS	DQB1-0502_DQA1-0102;DPB1-0202_DPA1-0103;DQB1-0302_DQA1-0301;DRB1_0404;DPB1-0402_DPA1-0103;DRB1_0402;DPB1-0201_DPA1-0103	0.576755053	0.578964503	0.614642519
surface glycoprotein	136	160	CNDPFLGVYYHKNNKSWMESEFRVY	DQB1-0502_DQA1-0102;DPB1-0202_DPA1-0103;DQB1-0302_DQA1-0301;DRB1_0404;DPB1-0402_DPA1-0103;DRB1_0402;DPB1-0201_DPA1-0103	0.576755053	0.578964503	0.614642519
surface glycoprotein	134	158	QFCNDPFLGVYYHKNNKSWMESEFR	DQB1-0502_DQA1-0102;DPB1-0202_DPA1-0103;DQB1-0302_DQA1-0301;DRB1_0404;DPB1-0402_DPA1-0103;DRB1_0402;DPB1-0201_DPA1-0103	0.576755053	0.578964503	0.614642519
surface glycoprotein	1181	1205	KEIDRLNEVAKNLNESLIDLQELGK	DPB1-1001_DPA1-0201;DPB1-1401_DPA1-0201;DQB1-0502_DQA1-0102;DQB1-0604_DQA1-0102;DPB1-1701_DPA1-0201;DPB1-0301_DPA1-0103;DPB1-0901_DPA1-0201;DRB4_0103;DRB3_0301	0.696581579	0.696581579	0.326648464
orf1ab polyprotein	6449	6473	TRLQSLENVAFNVVNKGHFDGQQGE	DPB1-0101_DPA1-0202;DRB1_1101;DRB1_1201;DRB1_1302;DRB1_1401;DPB1-0402_DPA1-0103;DRB1_0802;DPB1-0201_DPA1-0103	0.592823668	0.565931769	0.609535009
orf1a polyprotein	4263	4287	NSTVLSFCAFAVDAAKAYKDYLASG	DQB1-0302_DQA1-0301;DRB1_0411;DPB1-0501_DPA1-0201;DRB1_1501;DRB3_0101;DQB1-0301_DQA1-0505	0.673337842	0.694514179	0.340943533
orf1ab polyprotein	4263	4287	NSTVLSFCAFAVDAAKAYKDYLASG	DQB1-0302_DQA1-0301;DRB1_0411;DPB1-0501_DPA1-0201;DRB1_1501;DRB3_0101;DQB1-0301_DQA1-0505	0.673337842	0.694514179	0.340943533
orf1a polyprotein	1236	1260	VEEVTTTLEETKFLTENLLLYIDIN	DPB1-0101_DPA1-0103;DPB1-0401_DPA1-0103;DRB1_0302;DQB1-0202_DQA1-0201	0.754859607	0.749847788	0.080319
orf1ab polyprotein	1236	1260	VEEVTTTLEETKFLTENLLLYIDIN	DPB1-0101_DPA1-0103;DPB1-0401_DPA1-0103;DRB1_0302;DQB1-0202_DQA1-0201	0.754859607	0.749847788	0.080319
nucleocapsid phosphoprotein	215	239	GDAALALLLLDRLNQLESKMSGKGQ	DRB1_1102;DRB3_0301;DRB1_1405;DRB1_0804;DRB4_0103;DRB1_1104;DRB3_0101;DRB1_1406	0.774894197	0.767816376	0.05299854
nucleocapsid phosphoprotein	323	347	EVTPSGTWLTYTGAIKLDDKDPNFK	DRB1_1502;DRB1_0301;DRB1_1303;DRB1_1405;DRB5_0101;DRB1_0701;DRB3_0301	0.64853075	0.673985288	0.413902575
nucleocapsid phosphoprotein	324	348	VTPSGTWLTYTGAIKLDDKDPNFKD	DRB1_1502;DRB1_0301;DRB1_1303;DRB1_1405;DRB5_0101;DRB1_0701;DRB3_0301	0.64853075	0.673985288	0.413902575
orf1ab polyprotein	4980	5004	VIGTSKFYGGWHNMLKTVYSDVENP	DPB1-0401_DPA1-0103;DRB1_1402;DQB1-0202_DQA1-0201	0.751956368	0.749817767	0.080833949
orf1ab polyprotein	2735	2759	KNNLPFKLTCATTRQVVNVVTTKIA	DRB1_0901;DRB5_0101;DPB1-0301_DPA1-0103;DRB1_0701;DRB1_0402;DQB1-0301_DQA1-0505	0.678484603	0.682368408	0.33984375
orf1a polyprotein	2736	2760	NNLPFKLTCATTRQVVNVVTTKIAL	DRB1_0901;DRB5_0101;DPB1-0301_DPA1-0103;DRB1_0701;DRB1_0402;DQB1-0301_DQA1-0505	0.678484603	0.682368408	0.33984375
orf1ab polyprotein	2736	2760	NNLPFKLTCATTRQVVNVVTTKIAL	DRB1_0901;DRB5_0101;DPB1-0301_DPA1-0103;DRB1_0701;DRB1_0402;DQB1-0301_DQA1-0505	0.678484603	0.682368408	0.33984375
orf1a polyprotein	2735	2759	KNNLPFKLTCATTRQVVNVVTTKIA	DRB1_0901;DRB5_0101;DPB1-0301_DPA1-0103;DRB1_0701;DRB1_0402;DQB1-0301_DQA1-0505	0.678484603	0.682368408	0.33984375
orf1ab polyprotein	2703	2727	VAKSHNIALIWNVKDFMSLSEQLRK	DRB1_0410;DPB1-0202_DPA1-0103;DQB1-0302_DQA1-0301;DQB1-0201_DQA1-0201;DRB5_0102;DRB1_0411;DPB1-1101_DPA1-0201;DPB1-0201_DPA1-0103;DQB1-0603_DQA1-0103;DQB1-0202_DQA1-0201	0.630334388	0.626296764	0.502433413
orf1a polyprotein	2703	2727	VAKSHNIALIWNVKDFMSLSEQLRK	DRB1_0410;DPB1-0202_DPA1-0103;DQB1-0302_DQA1-0301;DQB1-0201_DQA1-0201;DRB5_0102;DRB1_0411;DPB1-1101_DPA1-0201;DPB1-0201_DPA1-0103;DQB1-0603_DQA1-0103;DQB1-0202_DQA1-0201	0.630334388	0.626296764	0.502433413
orf1a polyprotein	4018	4042	SEDKRAKVTSAMQTMLFTMLRKLDN	DPB1-0401_DPA1-0103;DQB1-0601_DQA1-0103;DQB1-0301_DQA1-0601;DRB1_0801	0.694061616	0.698120146	0.384191148
orf1ab polyprotein	4018	4042	SEDKRAKVTSAMQTMLFTMLRKLDN	DPB1-0401_DPA1-0103;DQB1-0601_DQA1-0103;DQB1-0301_DQA1-0601;DRB1_0801	0.694061616	0.698120146	0.384191148
orf1ab polyprotein	3298	3322	VVYCPRHVICTSEDMLNPNYEDLLI	DQB1-0201_DQA1-0501;DRB1_1503;DPB1-0101_DPA1-0103;DQB1-0201_DQA1-0201;DQB1-0302_DQA1-0301;DRB1_0403;DPB1-1101_DPA1-0201;DQB1-0603_DQA1-0103;DQB1-0202_DQA1-0201	0.677241044	0.662875282	0.390619348
orf1a polyprotein	3298	3322	VVYCPRHVICTSEDMLNPNYEDLLI	DQB1-0201_DQA1-0501;DRB1_1503;DPB1-0101_DPA1-0103;DQB1-0201_DQA1-0201;DQB1-0302_DQA1-0301;DRB1_0403;DPB1-1101_DPA1-0201;DQB1-0603_DQA1-0103;DQB1-0202_DQA1-0201	0.677241044	0.662875282	0.390619348
orf1ab polyprotein	3297	3321	DVVYCPRHVICTSEDMLNPNYEDLL	DQB1-0201_DQA1-0501;DRB1_1503;DPB1-0101_DPA1-0103;DQB1-0201_DQA1-0201;DQB1-0302_DQA1-0301;DRB1_0403;DPB1-1101_DPA1-0201;DQB1-0603_DQA1-0103;DQB1-0202_DQA1-0201	0.677241044	0.662875282	0.390619348
orf1a polyprotein	3297	3321	DVVYCPRHVICTSEDMLNPNYEDLL	DQB1-0201_DQA1-0501;DRB1_1503;DPB1-0101_DPA1-0103;DQB1-0201_DQA1-0201;DQB1-0302_DQA1-0301;DRB1_0403;DPB1-1101_DPA1-0201;DQB1-0603_DQA1-0103;DQB1-0202_DQA1-0201	0.677241044	0.662875282	0.390619348
orf1ab polyprotein	7043	7067	FDMSKFPLKLRGTAVMSLKEGQIND	DRB1_1503;DQB1-0602_DQA1-0102;DQB1-0201_DQA1-0201;DRB1_1202;DQB1-0604_DQA1-0102;DRB1_1201;DRB1_0701;DQB1-0202_DQA1-0201	0.652757072	0.642738526	0.454286423
orf1ab polyprotein	7044	7068	DMSKFPLKLRGTAVMSLKEGQINDM	DRB1_1503;DQB1-0602_DQA1-0102;DQB1-0201_DQA1-0201;DRB1_1202;DQB1-0604_DQA1-0102;DRB1_1201;DRB1_0701;DQB1-0202_DQA1-0201	0.652757072	0.642738526	0.454286423
orf1ab polyprotein	7046	7070	SKFPLKLRGTAVMSLKEGQINDMIL	DRB1_1503;DQB1-0602_DQA1-0102;DQB1-0201_DQA1-0201;DRB1_1202;DQB1-0604_DQA1-0102;DRB1_1201;DRB1_0701;DQB1-0202_DQA1-0201	0.652757072	0.642738526	0.454286423
orf1ab polyprotein	7045	7069	MSKFPLKLRGTAVMSLKEGQINDMI	DRB1_1503;DQB1-0602_DQA1-0102;DQB1-0201_DQA1-0201;DRB1_1202;DQB1-0604_DQA1-0102;DRB1_1201;DRB1_0701;DQB1-0202_DQA1-0201	0.652757072	0.642738526	0.454286423
nucleocapsid phosphoprotein	209	233	RMAGNGGDAALALLLLDRLNQLESK	DRB1_1102;DRB1_1301;DRB1_1101;DRB3_0301;DRB1_1405;DQB1-0303_DQA1-0301;DRB1_0804;DRB4_0103;DRB1_1104;DRB1_1406	0.676557835	0.669814924	0.411627762
orf1ab polyprotein	5225	5249	DPSRILGAGCFVDDIVKTDGTLMIE	DPB1-0101_DPA1-0201;DPB1-0101_DPA1-0103;DQB1-0501_DQA1-0101;DRB1_1405;DRB1_0701;DRB1_1404;DQB1-0301_DQA1-0505;DQB1-0202_DQA1-0201	0.697060331	0.705543522	0.277199749
orf1a polyprotein	2091	2115	GHTDLMAAYVDNSSLTIKKPNELSR	DRB3_0202;DQB1-0501_DQA1-0101;DRB4_0103	0.754307286	0.754307286	0.066844
orf1ab polyprotein	2091	2115	GHTDLMAAYVDNSSLTIKKPNELSR	DRB3_0202;DQB1-0501_DQA1-0101;DRB4_0103	0.754307286	0.754307286	0.066844
orf1ab polyprotein	3288	3312	TTLNGLWLDDVVYCPRHVICTSEDM	DPB1-1001_DPA1-0201;DQB1-0401_DQA1-0301;DRB1_1102;DRB1_1301;DRB1_0301;DPB1-0101_DPA1-0103;DQB1-0302_DQA1-0301;DPB1-1701_DPA1-0201;DRB1_1405;DRB1_1302;DRB1_0406;DRB1_1401;DPB1-0901_DPA1-0201;DRB1_1404;DRB1_1406	0.569163273	0.584725671	0.597535611
orf1a polyprotein	3288	3312	TTLNGLWLDDVVYCPRHVICTSEDM	DPB1-1001_DPA1-0201;DQB1-0401_DQA1-0301;DRB1_1102;DRB1_1301;DRB1_0301;DPB1-0101_DPA1-0103;DQB1-0302_DQA1-0301;DPB1-1701_DPA1-0201;DRB1_1405;DRB1_1302;DRB1_0406;DRB1_1401;DPB1-0901_DPA1-0201;DRB1_1404;DRB1_1406	0.569163273	0.584725671	0.597535611
orf1ab polyprotein	5742	5766	EPEYFNSVCRLMKTIGPDMFLGTCR	DQB1-0602_DQA1-0102;DQB1-0201_DQA1-0201;DRB1_1101;DRB1_1104;DRB1_0802;DQB1-0301_DQA1-0505;DQB1-0202_DQA1-0201;DPB1-0601_DPA1-0103	0.694828158	0.688965436	0.306509785
orf1ab polyprotein	5769	5793	PAEIVDTVSALVYDNKLKAHKDKSA	DRB1_0301;DQB1-0302_DQA1-0301;DQB1-0201_DQA1-0201;DRB1_1101;DRB1_1303;DQB1-0601_DQA1-0103;DRB1_0302;DRB1_1104;DQB1-0301_DQA1-0505	0.622574069	0.635872081	0.474588418
orf1a polyprotein	470	494	NEEIAIILASFSASTSAFVETVKGL	DRB1_1602;DQB1-0602_DQA1-0102;DQB1-0302_DQA1-0301;DRB1_1601;DRB1_0901;DQB1-0601_DQA1-0103;DRB1_0701	0.595103433	0.596168188	0.555673197
orf1ab polyprotein	469	493	LNEEIAIILASFSASTSAFVETVKG	DRB1_1602;DQB1-0602_DQA1-0102;DQB1-0302_DQA1-0301;DRB1_1601;DRB1_0901;DQB1-0601_DQA1-0103;DRB1_0701	0.595103433	0.596168188	0.555673197
orf1ab polyprotein	472	496	EIAIILASFSASTSAFVETVKGLDY	DRB1_1602;DQB1-0602_DQA1-0102;DQB1-0302_DQA1-0301;DRB1_1601;DRB1_0901;DQB1-0601_DQA1-0103;DRB1_0701	0.595103433	0.596168188	0.555673197
orf1a polyprotein	471	495	EEIAIILASFSASTSAFVETVKGLD	DRB1_1602;DQB1-0602_DQA1-0102;DQB1-0302_DQA1-0301;DRB1_1601;DRB1_0901;DQB1-0601_DQA1-0103;DRB1_0701	0.595103433	0.596168188	0.555673197
orf1a polyprotein	469	493	LNEEIAIILASFSASTSAFVETVKG	DRB1_1602;DQB1-0602_DQA1-0102;DQB1-0302_DQA1-0301;DRB1_1601;DRB1_0901;DQB1-0601_DQA1-0103;DRB1_0701	0.595103433	0.596168188	0.555673197
orf1ab polyprotein	471	495	EEIAIILASFSASTSAFVETVKGLD	DRB1_1602;DQB1-0602_DQA1-0102;DQB1-0302_DQA1-0301;DRB1_1601;DRB1_0901;DQB1-0601_DQA1-0103;DRB1_0701	0.595103433	0.596168188	0.555673197
orf1ab polyprotein	470	494	NEEIAIILASFSASTSAFVETVKGL	DRB1_1602;DQB1-0602_DQA1-0102;DQB1-0302_DQA1-0301;DRB1_1601;DRB1_0901;DQB1-0601_DQA1-0103;DRB1_0701	0.595103433	0.596168188	0.555673197
orf1a polyprotein	472	496	EIAIILASFSASTSAFVETVKGLDY	DRB1_1602;DQB1-0602_DQA1-0102;DQB1-0302_DQA1-0301;DRB1_1601;DRB1_0901;DQB1-0601_DQA1-0103;DRB1_0701	0.595103433	0.596168188	0.555673197
surface glycoprotein	1188	1212	EVAKNLNESLIDLQELGKYEQYIKW	DQB1-0502_DQA1-0102;DPB1-0501_DPA1-0202;DQB1-0604_DQA1-0102;DRB4_0103;DRB1_1104	0.565508707	0.571148203	0.6816103
surface glycoprotein	1185	1209	RLNEVAKNLNESLIDLQELGKYEQY	DQB1-0502_DQA1-0102;DPB1-0501_DPA1-0202;DQB1-0604_DQA1-0102;DRB4_0103;DRB1_1104	0.565508707	0.571148203	0.6816103
surface glycoprotein	1189	1213	VAKNLNESLIDLQELGKYEQYIKWP	DQB1-0502_DQA1-0102;DPB1-0501_DPA1-0202;DQB1-0604_DQA1-0102;DRB4_0103;DRB1_1104	0.565508707	0.571148203	0.6816103
surface glycoprotein	1190	1214	AKNLNESLIDLQELGKYEQYIKWPW	DQB1-0502_DQA1-0102;DPB1-0501_DPA1-0202;DQB1-0604_DQA1-0102;DRB4_0103;DRB1_1104	0.565508707	0.571148203	0.6816103
surface glycoprotein	1191	1215	KNLNESLIDLQELGKYEQYIKWPWY	DQB1-0502_DQA1-0102;DPB1-0501_DPA1-0202;DQB1-0604_DQA1-0102;DRB4_0103;DRB1_1104	0.565508707	0.571148203	0.6816103
surface glycoprotein	1187	1211	NEVAKNLNESLIDLQELGKYEQYIK	DQB1-0502_DQA1-0102;DPB1-0501_DPA1-0202;DQB1-0604_DQA1-0102;DRB4_0103;DRB1_1104	0.565508707	0.571148203	0.6816103
surface glycoprotein	1186	1210	LNEVAKNLNESLIDLQELGKYEQYI	DQB1-0502_DQA1-0102;DPB1-0501_DPA1-0202;DQB1-0604_DQA1-0102;DRB4_0103;DRB1_1104	0.565508707	0.571148203	0.6816103
orf1ab polyprotein	5637	5661	AVDALCEKALKYLPIDKCSRIIPAR	DRB1_0404;DRB1_1302;DRB1_1402;DRB4_0103;DPB1-0201_DPA1-0103	0.663714344	0.660465776	0.405232421
orf1a polyprotein	3807	3831	TLGVYDYLVSTQEFRYMNSQGLLPP	DRB1_1602;DRB1_0401;DRB1_1601;DRB1_0407;DRB1_0901;DRB1_0405;DRB1_0701;DRB1_0803;DRB1_1001;DQB1-0202_DQA1-0201	0.580023603	0.587259539	0.583858892
orf1ab polyprotein	3807	3831	TLGVYDYLVSTQEFRYMNSQGLLPP	DRB1_1602;DRB1_0401;DRB1_1601;DRB1_0407;DRB1_0901;DRB1_0405;DRB1_0701;DRB1_0803;DRB1_1001;DQB1-0202_DQA1-0201	0.580023603	0.587259539	0.583858892
orf1a polyprotein	2949	2973	RPDTRYVLMDGSIIQFPNTYLEGSV	DRB1_1503;DRB1_1602;DRB1_1502;DRB1_0301;DRB1_0401;DRB1_0404;DRB1_1601;DRB5_0202;DRB1_1501	0.605997953	0.676540363	0.440884892
orf1ab polyprotein	2949	2973	RPDTRYVLMDGSIIQFPNTYLEGSV	DRB1_1503;DRB1_1602;DRB1_1502;DRB1_0301;DRB1_0401;DRB1_0404;DRB1_1601;DRB5_0202;DRB1_1501	0.605997953	0.676540363	0.440884892
orf1ab polyprotein	7042	7066	LFDMSKFPLKLRGTAVMSLKEGQIN	DQB1-0602_DQA1-0102;DQB1-0201_DQA1-0201;DRB1_1202;DQB1-0604_DQA1-0102;DRB1_1201;DRB1_0701;DQB1-0202_DQA1-0201	0.637836636	0.642578313	0.45352233
orf1a polyprotein	2875	2899	RTTNGDFLHFLPRVFSAVGNICYTP	DQB1-0201_DQA1-0501;DQB1-0401_DQA1-0301;DRB1_1102;DRB1_1101;DRB1_1402;DRB1_1401;DRB1_0804;DRB1_1104;DRB1_0802;DPB1-0201_DPA1-0103;DRB1_1406;DRB1_0801	0.594586577	0.571048738	0.577687964
orf1a polyprotein	2873	2897	ILRTTNGDFLHFLPRVFSAVGNICY	DQB1-0201_DQA1-0501;DQB1-0401_DQA1-0301;DRB1_1102;DRB1_1101;DRB1_1402;DRB1_1401;DRB1_0804;DRB1_1104;DRB1_0802;DPB1-0201_DPA1-0103;DRB1_1406;DRB1_0801	0.594586577	0.571048738	0.577687964
orf1ab polyprotein	2875	2899	RTTNGDFLHFLPRVFSAVGNICYTP	DQB1-0201_DQA1-0501;DQB1-0401_DQA1-0301;DRB1_1102;DRB1_1101;DRB1_1402;DRB1_1401;DRB1_0804;DRB1_1104;DRB1_0802;DPB1-0201_DPA1-0103;DRB1_1406;DRB1_0801	0.594586577	0.571048738	0.577687964
orf1a polyprotein	2874	2898	LRTTNGDFLHFLPRVFSAVGNICYT	DQB1-0201_DQA1-0501;DQB1-0401_DQA1-0301;DRB1_1102;DRB1_1101;DRB1_1402;DRB1_1401;DRB1_0804;DRB1_1104;DRB1_0802;DPB1-0201_DPA1-0103;DRB1_1406;DRB1_0801	0.594586577	0.571048738	0.577687964
orf1ab polyprotein	2874	2898	LRTTNGDFLHFLPRVFSAVGNICYT	DQB1-0201_DQA1-0501;DQB1-0401_DQA1-0301;DRB1_1102;DRB1_1101;DRB1_1402;DRB1_1401;DRB1_0804;DRB1_1104;DRB1_0802;DPB1-0201_DPA1-0103;DRB1_1406;DRB1_0801	0.594586577	0.571048738	0.577687964
orf1ab polyprotein	2873	2897	ILRTTNGDFLHFLPRVFSAVGNICY	DQB1-0201_DQA1-0501;DQB1-0401_DQA1-0301;DRB1_1102;DRB1_1101;DRB1_1402;DRB1_1401;DRB1_0804;DRB1_1104;DRB1_0802;DPB1-0201_DPA1-0103;DRB1_1406;DRB1_0801	0.594586577	0.571048738	0.577687964
orf1ab polyprotein	4622	4646	GVPVVDSYYSLLMPILTLTRALTAE	DQB1-0602_DQA1-0102;DRB1_1101;DRB1_0701;DRB1_0804;DRB1_1104;DRB1_0101;DRB1_1001	0.636410674	0.666856555	0.402630784
orf1ab polyprotein	4020	4044	DKRAKVTSAMQTMLFTMLRKLDNDA	DPB1-0401_DPA1-0103;DRB1_1101;DRB1_0801	0.724695144	0.727896308	0.179935531
orf1a polyprotein	4020	4044	DKRAKVTSAMQTMLFTMLRKLDNDA	DPB1-0401_DPA1-0103;DRB1_1101;DRB1_0801	0.724695144	0.727896308	0.179935531
orf1a polyprotein	1604	1628	VTKIKPHNSHEGKTFYVLPNDDTLR	DRB1_1602;DRB1_1502;DPB1-1301_DPA1-0201;DPB1-0202_DPA1-0103;DRB1_0404;DRB1_1601;DQB1-0501_DQA1-0101;DRB1_1001;DRB1_0101;DPB1-0201_DPA1-0103	0.566639391	0.578366321	0.590969621
orf1ab polyprotein	1604	1628	VTKIKPHNSHEGKTFYVLPNDDTLR	DRB1_1602;DRB1_1502;DPB1-1301_DPA1-0201;DPB1-0202_DPA1-0103;DRB1_0404;DRB1_1601;DQB1-0501_DQA1-0101;DRB1_1001;DRB1_0101;DPB1-0201_DPA1-0103	0.566639391	0.578366321	0.590969621
orf1ab polyprotein	2123	2147	ATHGLAAVNSVPWDTIANYAKPFLN	DPB1-0401_DPA1-0103;DRB1_1201;DRB1_1301	0.724240692	0.726320273	0.174542331
orf1a polyprotein	2123	2147	ATHGLAAVNSVPWDTIANYAKPFLN	DPB1-0401_DPA1-0103;DRB1_1201;DRB1_1301	0.724240692	0.726320273	0.174542331
surface glycoprotein	315	339	TSNFRVQPTESIVRFPNITNLCPFG	DRB1_1502;DRB1_0401;DRB1_0404;DRB5_0202;DRB1_0302;DRB1_0405;DRB1_0402;DRB1_1501;DRB1_0101;DRB1_1001	0.570806282	0.644485031	0.507715343
ORF9b protein	65	89	EDKAFQLTPIAVQMTKLATTEELPD	DQB1-0602_DQA1-0102;DRB4_0103;DRB1_0402;DRB1_0407;DQB1-0202_DQA1-0201	0.732101834	0.727431179	0.080140157
orf1ab polyprotein	2731	2755	SAAKKNNLPFKLTCATTRQVVNVVT	DRB1_0901;DRB5_0102;DRB5_0101;DRB1_0701;DRB1_0402;DQB1-0301_DQA1-0505;DPB1-0901_DPA1-0201	0.625248875	0.629775752	0.477090234
orf1a polyprotein	2731	2755	SAAKKNNLPFKLTCATTRQVVNVVT	DRB1_0901;DRB5_0102;DRB5_0101;DRB1_0701;DRB1_0402;DQB1-0301_DQA1-0505;DPB1-0901_DPA1-0201	0.625248875	0.629775752	0.477090234
orf1a polyprotein	2732	2756	AAKKNNLPFKLTCATTRQVVNVVTT	DRB1_0901;DRB5_0102;DRB5_0101;DRB1_0701;DRB1_0402;DQB1-0301_DQA1-0505;DPB1-0901_DPA1-0201	0.625248875	0.629775752	0.477090234
orf1ab polyprotein	2732	2756	AAKKNNLPFKLTCATTRQVVNVVTT	DRB1_0901;DRB5_0102;DRB5_0101;DRB1_0701;DRB1_0402;DQB1-0301_DQA1-0505;DPB1-0901_DPA1-0201	0.625248875	0.629775752	0.477090234
orf1ab polyprotein	5773	5797	VDTVSALVYDNKLKAHKDKSAQCFK	DRB1_0301;DQB1-0302_DQA1-0301;DRB1_1101;DQB1-0501_DQA1-0101;DRB1_1303;DQB1-0601_DQA1-0103;DRB1_0302;DRB1_0402;DRB1_1104	0.624816191	0.638128858	0.44914483
orf1ab polyprotein	3300	3324	YCPRHVICTSEDMLNPNYEDLLIRK	DQB1-0201_DQA1-0501;DRB1_1503;DPB1-0101_DPA1-0103;DQB1-0201_DQA1-0201;DQB1-0302_DQA1-0301;DRB1_0403;DQB1-0603_DQA1-0103;DQB1-0202_DQA1-0201	0.662121706	0.647082993	0.390619348
orf1a polyprotein	3301	3325	CPRHVICTSEDMLNPNYEDLLIRKS	DQB1-0201_DQA1-0501;DRB1_1503;DPB1-0101_DPA1-0103;DQB1-0201_DQA1-0201;DQB1-0302_DQA1-0301;DRB1_0403;DQB1-0603_DQA1-0103;DQB1-0202_DQA1-0201	0.662121706	0.647082993	0.390619348
orf1a polyprotein	3299	3323	VYCPRHVICTSEDMLNPNYEDLLIR	DQB1-0201_DQA1-0501;DRB1_1503;DPB1-0101_DPA1-0103;DQB1-0201_DQA1-0201;DQB1-0302_DQA1-0301;DRB1_0403;DQB1-0603_DQA1-0103;DQB1-0202_DQA1-0201	0.662121706	0.647082993	0.390619348
orf1a polyprotein	3300	3324	YCPRHVICTSEDMLNPNYEDLLIRK	DQB1-0201_DQA1-0501;DRB1_1503;DPB1-0101_DPA1-0103;DQB1-0201_DQA1-0201;DQB1-0302_DQA1-0301;DRB1_0403;DQB1-0603_DQA1-0103;DQB1-0202_DQA1-0201	0.662121706	0.647082993	0.390619348
orf1ab polyprotein	3301	3325	CPRHVICTSEDMLNPNYEDLLIRKS	DQB1-0201_DQA1-0501;DRB1_1503;DPB1-0101_DPA1-0103;DQB1-0201_DQA1-0201;DQB1-0302_DQA1-0301;DRB1_0403;DQB1-0603_DQA1-0103;DQB1-0202_DQA1-0201	0.662121706	0.647082993	0.390619348
orf1ab polyprotein	3299	3323	VYCPRHVICTSEDMLNPNYEDLLIR	DQB1-0201_DQA1-0501;DRB1_1503;DPB1-0101_DPA1-0103;DQB1-0201_DQA1-0201;DQB1-0302_DQA1-0301;DRB1_0403;DQB1-0603_DQA1-0103;DQB1-0202_DQA1-0201	0.662121706	0.647082993	0.390619348
orf1ab polyprotein	5634	5658	SHAAVDALCEKALKYLPIDKCSRII	DRB1_1503;DRB1_0404;DRB1_1202;DRB4_0103;DPB1-0201_DPA1-0103	0.646025243	0.63044699	0.451875599
orf1ab polyprotein	5633	5657	CSHAAVDALCEKALKYLPIDKCSRI	DRB1_1503;DRB1_0404;DRB1_1202;DRB4_0103;DPB1-0201_DPA1-0103	0.646025243	0.63044699	0.451875599
orf1ab polyprotein	5636	5660	AAVDALCEKALKYLPIDKCSRIIPA	DRB1_1503;DRB1_0404;DRB1_1202;DRB4_0103;DPB1-0201_DPA1-0103	0.646025243	0.63044699	0.451875599
orf1ab polyprotein	5632	5656	ACSHAAVDALCEKALKYLPIDKCSR	DRB1_1503;DRB1_0404;DRB1_1202;DRB4_0103;DPB1-0201_DPA1-0103	0.646025243	0.63044699	0.451875599
orf1ab polyprotein	5635	5659	HAAVDALCEKALKYLPIDKCSRIIP	DRB1_1503;DRB1_0404;DRB1_1202;DRB4_0103;DPB1-0201_DPA1-0103	0.646025243	0.63044699	0.451875599
surface glycoprotein	1160	1184	TSPDVDLGDISGINASVVNIQKEID	DQB1-0302_DQA1-0301;DQB1-0201_DQA1-0501;DQB1-0602_DQA1-0102;DQB1-0301_DQA1-0303	0.680775	0.680775	0.3111
surface glycoprotein	1159	1183	HTSPDVDLGDISGINASVVNIQKEI	DQB1-0302_DQA1-0301;DQB1-0201_DQA1-0501;DQB1-0602_DQA1-0102;DQB1-0301_DQA1-0303	0.680775	0.680775	0.3111
surface glycoprotein	316	340	SNFRVQPTESIVRFPNITNLCPFGE	DRB1_1502;DQB1-0302_DQA1-0301;DRB1_0401;DRB1_0404;DRB5_0202;DRB1_0405;DRB1_0402;DRB1_1501;DRB1_1001	0.561145169	0.615420235	0.540281015
surface glycoprotein	1184	1208	DRLNEVAKNLNESLIDLQELGKYEQ	DQB1-0502_DQA1-0102;DPB1-0501_DPA1-0202;DQB1-0604_DQA1-0102;DPB1-1701_DPA1-0201;DRB4_0103	0.555923875	0.555923875	0.677430526
orf1ab polyprotein	6751	6775	LDDFVEIIKSQDLSVVSKVVKVTID	DRB1_1602;DRB1_1303;DRB1_1402;DRB1_0803;DRB1_0701;DPB1-0402_DPA1-0103;DRB1_1501;DRB1_0802	0.590869122	0.609307717	0.508329639
orf1a polyprotein	481	505	SASTSAFVETVKGLDYKAFKQIVES	DPB1-0202_DPA1-0103;DRB1_1202;DRB1_1101;DRB1_1303;DQB1-0601_DQA1-0103;DRB1_1201;DRB1_0803;DPB1-0201_DPA1-0103;DQB1-0202_DQA1-0201;DRB1_0801	0.541363197	0.529742171	0.638305989
orf1ab polyprotein	481	505	SASTSAFVETVKGLDYKAFKQIVES	DPB1-0202_DPA1-0103;DRB1_1202;DRB1_1101;DRB1_1303;DQB1-0601_DQA1-0103;DRB1_1201;DRB1_0803;DPB1-0201_DPA1-0103;DQB1-0202_DQA1-0201;DRB1_0801	0.541363197	0.529742171	0.638305989
orf1a polyprotein	2400	2424	VVDGCNSSTCMMCYKRNRATRVECT	DRB1_1301;DRB3_0202;DRB1_1302;DRB1_0701;DRB1_0101	0.647976813	0.688266539	0.31010364
orf1ab polyprotein	2399	2423	HVVDGCNSSTCMMCYKRNRATRVEC	DRB1_1301;DRB3_0202;DRB1_1302;DRB1_0701;DRB1_0101	0.647976813	0.688266539	0.31010364
orf1a polyprotein	2399	2423	HVVDGCNSSTCMMCYKRNRATRVEC	DRB1_1301;DRB3_0202;DRB1_1302;DRB1_0701;DRB1_0101	0.647976813	0.688266539	0.31010364
orf1ab polyprotein	2400	2424	VVDGCNSSTCMMCYKRNRATRVECT	DRB1_1301;DRB3_0202;DRB1_1302;DRB1_0701;DRB1_0101	0.647976813	0.688266539	0.31010364
orf1ab polyprotein	2210	2234	CLEASFNYLKSPNFSKLINIIIWFL	DRB1_1602;DRB1_1502;DPB1-1301_DPA1-0201;DRB1_1601;DRB5_0102;DRB1_1202;DRB1_1201;DRB5_0101;DRB1_1402;DPB1-0402_DPA1-0103;DRB1_0101	0.608074181	0.60761939	0.502073517
orf1a polyprotein	2210	2234	CLEASFNYLKSPNFSKLINIIIWFL	DRB1_1602;DRB1_1502;DPB1-1301_DPA1-0201;DRB1_1601;DRB5_0102;DRB1_1202;DRB1_1201;DRB5_0101;DRB1_1402;DPB1-0402_DPA1-0103;DRB1_0101	0.608074181	0.60761939	0.502073517
orf1ab polyprotein	6450	6474	RLQSLENVAFNVVNKGHFDGQQGEV	DPB1-0101_DPA1-0202;DRB1_1101;DRB1_1302;DRB1_1401;DPB1-0402_DPA1-0103;DRB1_0802;DPB1-0201_DPA1-0103	0.574817219	0.551052532	0.582473016
orf1ab polyprotein	5630	5654	YTACSHAAVDALCEKALKYLPIDKC	DRB1_1503;DRB1_1202;DQB1-0604_DQA1-0102;DRB4_0103;DPB1-0201_DPA1-0103	0.645607102	0.628644759	0.440994595
orf1ab polyprotein	5629	5653	VYTACSHAAVDALCEKALKYLPIDK	DRB1_1503;DRB1_1202;DQB1-0604_DQA1-0102;DRB4_0103;DPB1-0201_DPA1-0103	0.645607102	0.628644759	0.440994595
orf1ab polyprotein	5684	5708	VNALPETTADIVVFDEISMATNYDL	DRB1_1503;DRB1_1301;DRB1_0301;DQB1-0302_DQA1-0301;DQB1-0601_DQA1-0103;DRB1_1501	0.595041925	0.645723327	0.458714978
orf1a polyprotein	2730	2754	RSAAKKNNLPFKLTCATTRQVVNVV	DRB1_0901;DRB5_0102;DRB5_0101;DRB1_0701;DPB1-0901_DPA1-0201;DQB1-0301_DQA1-0505	0.616557268	0.621203396	0.472342749
orf1ab polyprotein	2730	2754	RSAAKKNNLPFKLTCATTRQVVNVV	DRB1_0901;DRB5_0102;DRB5_0101;DRB1_0701;DPB1-0901_DPA1-0201;DQB1-0301_DQA1-0505	0.616557268	0.621203396	0.472342749
orf1a polyprotein	2729	2753	IRSAAKKNNLPFKLTCATTRQVVNV	DRB1_0901;DRB5_0102;DRB5_0101;DRB1_0701;DPB1-0901_DPA1-0201;DQB1-0301_DQA1-0505	0.616557268	0.621203396	0.472342749
orf1ab polyprotein	2729	2753	IRSAAKKNNLPFKLTCATTRQVVNV	DRB1_0901;DRB5_0102;DRB5_0101;DRB1_0701;DPB1-0901_DPA1-0201;DQB1-0301_DQA1-0505	0.616557268	0.621203396	0.472342749
orf1ab polyprotein	5996	6020	NMFITREEAIRHVRAWIGFDVEGCH	DPB1-0101_DPA1-0201;DQB1-0602_DQA1-0102;DPB1-0101_DPA1-0103;DRB1_1601;DRB1_0403;DRB1_0411;DPB1-0501_DPA1-0201;DRB1_0102;DRB1_1501;DRB1_0101;DRB1_1001	0.606875917	0.648340547	0.428518344
orf1ab polyprotein	5997	6021	MFITREEAIRHVRAWIGFDVEGCHA	DPB1-0101_DPA1-0201;DQB1-0602_DQA1-0102;DPB1-0101_DPA1-0103;DRB1_1601;DRB1_0403;DRB1_0411;DPB1-0501_DPA1-0201;DRB1_0102;DRB1_1501;DRB1_0101;DRB1_1001	0.606875917	0.648340547	0.428518344
orf1ab polyprotein	5995	6019	PNMFITREEAIRHVRAWIGFDVEGC	DPB1-0101_DPA1-0201;DQB1-0602_DQA1-0102;DPB1-0101_DPA1-0103;DRB1_1601;DRB1_0403;DRB1_0411;DPB1-0501_DPA1-0201;DRB1_0102;DRB1_1501;DRB1_0101;DRB1_1001	0.606875917	0.648340547	0.428518344
orf1ab polyprotein	5999	6023	ITREEAIRHVRAWIGFDVEGCHATR	DPB1-0101_DPA1-0201;DQB1-0602_DQA1-0102;DPB1-0101_DPA1-0103;DRB1_1601;DRB1_0403;DRB1_0411;DPB1-0501_DPA1-0201;DRB1_0102;DRB1_1501;DRB1_0101;DRB1_1001	0.606875917	0.648340547	0.428518344
orf1ab polyprotein	5998	6022	FITREEAIRHVRAWIGFDVEGCHAT	DPB1-0101_DPA1-0201;DQB1-0602_DQA1-0102;DPB1-0101_DPA1-0103;DRB1_1601;DRB1_0403;DRB1_0411;DPB1-0501_DPA1-0201;DRB1_0102;DRB1_1501;DRB1_0101;DRB1_1001	0.606875917	0.648340547	0.428518344
orf1ab polyprotein	5621	5645	LYYPSARIVYTACSHAAVDALCEKA	DRB1_1503;DQB1-0303_DQA1-0201;DQB1-0602_DQA1-0102;DQB1-0302_DQA1-0301;DRB1_0403;DRB1_0404;DQB1-0604_DQA1-0102;DQB1-0601_DQA1-0103;DRB1_0102;DRB1_0402;DRB1_1104;DPB1-0601_DPA1-0103	0.649392335	0.635511812	0.388756328
orf1ab polyprotein	5620	5644	ALYYPSARIVYTACSHAAVDALCEK	DRB1_1503;DQB1-0303_DQA1-0201;DQB1-0602_DQA1-0102;DQB1-0302_DQA1-0301;DRB1_0403;DRB1_0404;DQB1-0604_DQA1-0102;DQB1-0601_DQA1-0103;DRB1_0102;DRB1_0402;DRB1_1104;DPB1-0601_DPA1-0103	0.649392335	0.635511812	0.388756328
orf1ab polyprotein	5619	5643	LALYYPSARIVYTACSHAAVDALCE	DRB1_1503;DQB1-0303_DQA1-0201;DQB1-0602_DQA1-0102;DQB1-0302_DQA1-0301;DRB1_0403;DRB1_0404;DQB1-0604_DQA1-0102;DQB1-0601_DQA1-0103;DRB1_0102;DRB1_0402;DRB1_1104;DPB1-0601_DPA1-0103	0.649392335	0.635511812	0.388756328
orf1ab polyprotein	5622	5646	YYPSARIVYTACSHAAVDALCEKAL	DRB1_1503;DQB1-0303_DQA1-0201;DQB1-0602_DQA1-0102;DQB1-0302_DQA1-0301;DRB1_0403;DRB1_0404;DQB1-0604_DQA1-0102;DQB1-0601_DQA1-0103;DRB1_0102;DRB1_0402;DRB1_1104;DPB1-0601_DPA1-0103	0.649392335	0.635511812	0.388756328
orf1ab polyprotein	4765	4789	VYAADPAMHAASGNLLLDKRTTCFS	DPB1-0101_DPA1-0201;DRB1_0901;DRB1_0302;DRB1_0102;DRB1_1401;DRB1_0701;DRB1_1404;DRB1_0101;DQB1-0301_DQA1-0505	0.613630149	0.627997165	0.446359835
orf1ab polyprotein	4766	4790	YAADPAMHAASGNLLLDKRTTCFSV	DPB1-0101_DPA1-0201;DRB1_0901;DRB1_0302;DRB1_0102;DRB1_1401;DRB1_0701;DRB1_1404;DRB1_0101;DQB1-0301_DQA1-0505	0.613630149	0.627997165	0.446359835
orf1a polyprotein	3118	3142	NDVSFLAHIQWMVMFTPLVPFWITI	DPB1-0401_DPA1-0103;DRB1_0401;DRB1_0804	0.7231771	0.734850391	0.096889902
orf1ab polyprotein	3118	3142	NDVSFLAHIQWMVMFTPLVPFWITI	DPB1-0401_DPA1-0103;DRB1_0401;DRB1_0804	0.7231771	0.734850391	0.096889902
orf1a polyprotein	1340	1364	EEAKTVLKKCKSAFYILPSIISNEK	DPB1-1001_DPA1-0201;DRB1_1602;DRB1_0404;DRB1_0403;DRB1_1601;DRB1_0402;DRB1_1101;DQB1-0501_DQA1-0101;DRB1_1202;DRB1_0405;DPB1-0901_DPA1-0201;DRB1_1404;DRB1_0101	0.531670513	0.533619294	0.635825527
orf1ab polyprotein	1340	1364	EEAKTVLKKCKSAFYILPSIISNEK	DPB1-1001_DPA1-0201;DRB1_1602;DRB1_0404;DRB1_0403;DRB1_1601;DRB1_0402;DRB1_1101;DQB1-0501_DQA1-0101;DRB1_1202;DRB1_0405;DPB1-0901_DPA1-0201;DRB1_1404;DRB1_0101	0.531670513	0.533619294	0.635825527
orf1ab polyprotein	6432	6456	SLWVYKQFDTYNLWNTFTRLQSLEN	DQB1-0602_DQA1-0102;DRB1_1502;DRB5_0102;DRB1_1101;DRB1_1302;DRB5_0101;DRB1_0804;DRB1_1104;DRB1_0802	0.652375605	0.631446635	0.386942194
membrane glycoprotein	55	79	WLLWPVTLACFVLAAVYRINWITGG	DQB1-0602_DQA1-0102;DQB1-0502_DQA1-0102;DRB1_0901;DRB3_0202;DQB1-0501_DQA1-0101;DRB1_0804	0.64091856	0.627453737	0.414380377
membrane glycoprotein	57	81	LWPVTLACFVLAAVYRINWITGGIA	DQB1-0602_DQA1-0102;DQB1-0502_DQA1-0102;DRB1_0901;DRB3_0202;DQB1-0501_DQA1-0101;DRB1_0804	0.64091856	0.627453737	0.414380377
membrane glycoprotein	54	78	LWLLWPVTLACFVLAAVYRINWITG	DQB1-0602_DQA1-0102;DQB1-0502_DQA1-0102;DRB1_0901;DRB3_0202;DQB1-0501_DQA1-0101;DRB1_0804	0.64091856	0.627453737	0.414380377
membrane glycoprotein	58	82	WPVTLACFVLAAVYRINWITGGIAI	DQB1-0602_DQA1-0102;DQB1-0502_DQA1-0102;DRB1_0901;DRB3_0202;DQB1-0501_DQA1-0101;DRB1_0804	0.64091856	0.627453737	0.414380377
membrane glycoprotein	56	80	LLWPVTLACFVLAAVYRINWITGGI	DQB1-0602_DQA1-0102;DQB1-0502_DQA1-0102;DRB1_0901;DRB3_0202;DQB1-0501_DQA1-0101;DRB1_0804	0.64091856	0.627453737	0.414380377
surface glycoprotein	441	465	LDSKVGGNYNYLYRLFRKSNLKPFE	DPB1-0202_DPA1-0103;DRB1_1101;DRB1_1302;DRB1_1402;DPB1-0402_DPA1-0103;DRB1_1104;DRB1_0802;DPB1-0201_DPA1-0103	0.574186991	0.558482949	0.565849261
surface glycoprotein	440	464	NLDSKVGGNYNYLYRLFRKSNLKPF	DPB1-0202_DPA1-0103;DRB1_1101;DRB1_1302;DRB1_1402;DPB1-0402_DPA1-0103;DRB1_1104;DRB1_0802;DPB1-0201_DPA1-0103	0.574186991	0.558482949	0.565849261
surface glycoprotein	442	466	DSKVGGNYNYLYRLFRKSNLKPFER	DPB1-0202_DPA1-0103;DRB1_1101;DRB1_1302;DRB1_1402;DPB1-0402_DPA1-0103;DRB1_1104;DRB1_0802;DPB1-0201_DPA1-0103	0.574186991	0.558482949	0.565849261
surface glycoprotein	444	468	KVGGNYNYLYRLFRKSNLKPFERDI	DPB1-0202_DPA1-0103;DRB1_1101;DRB1_1302;DRB1_1402;DPB1-0402_DPA1-0103;DRB1_1104;DRB1_0802;DPB1-0201_DPA1-0103	0.574186991	0.558482949	0.565849261
surface glycoprotein	443	467	SKVGGNYNYLYRLFRKSNLKPFERD	DPB1-0202_DPA1-0103;DRB1_1101;DRB1_1302;DRB1_1402;DPB1-0402_DPA1-0103;DRB1_1104;DRB1_0802;DPB1-0201_DPA1-0103	0.574186991	0.558482949	0.565849261
surface glycoprotein	445	469	VGGNYNYLYRLFRKSNLKPFERDIS	DPB1-0202_DPA1-0103;DRB1_1101;DRB1_1302;DRB1_1402;DPB1-0402_DPA1-0103;DRB1_1104;DRB1_0802;DPB1-0201_DPA1-0103	0.574186991	0.558482949	0.565849261
orf1ab polyprotein	4019	4043	EDKRAKVTSAMQTMLFTMLRKLDND	DPB1-0401_DPA1-0103;DQB1-0301_DQA1-0601;DRB1_0801	0.689978358	0.694091056	0.295825908
orf1a polyprotein	4019	4043	EDKRAKVTSAMQTMLFTMLRKLDND	DPB1-0401_DPA1-0103;DQB1-0301_DQA1-0601;DRB1_0801	0.689978358	0.694091056	0.295825908
orf1ab polyprotein	5552	5576	TSHTVMPLSAPTLVPQEHYVRITGL	DQB1-0302_DQA1-0301;DPB1-0501_DPA1-0201;DRB1_1201;DRB1_0102;DRB4_0103;DRB1_0101	0.664102905	0.67445521	0.308151278
orf1ab polyprotein	5551	5575	LTSHTVMPLSAPTLVPQEHYVRITG	DQB1-0302_DQA1-0301;DPB1-0501_DPA1-0201;DRB1_1201;DRB1_0102;DRB4_0103;DRB1_0101	0.664102905	0.67445521	0.308151278
orf1a polyprotein	2880	2904	DFLHFLPRVFSAVGNICYTPSKLIE	DQB1-0201_DQA1-0501;DRB1_1102;DRB1_1602;DRB1_0403;DRB1_0404;DRB1_1601;DRB1_0102;DRB1_0701;DQB1-0301_DQA1-0505	0.648697657	0.646836492	0.360495392
orf1ab polyprotein	2880	2904	DFLHFLPRVFSAVGNICYTPSKLIE	DQB1-0201_DQA1-0501;DRB1_1102;DRB1_1602;DRB1_0403;DRB1_0404;DRB1_1601;DRB1_0102;DRB1_0701;DQB1-0301_DQA1-0505	0.648697657	0.646836492	0.360495392
orf1ab polyprotein	3109	3133	YLYLTFYLTNDVSFLAHIQWMVMFT	DPB1-0401_DPA1-0103;DRB1_1202;DRB1_1201;DRB1_0302;DRB1_0804	0.705699298	0.688372315	0.259933893
orf1ab polyprotein	3112	3136	LTFYLTNDVSFLAHIQWMVMFTPLV	DPB1-0401_DPA1-0103;DRB1_1202;DRB1_1201;DRB1_0302;DRB1_0804	0.705699298	0.688372315	0.259933893
orf1ab polyprotein	3107	3131	VIYLYLTFYLTNDVSFLAHIQWMVM	DPB1-0401_DPA1-0103;DRB1_1202;DRB1_1201;DRB1_0302;DRB1_0804	0.705699298	0.688372315	0.259933893
orf1a polyprotein	3107	3131	VIYLYLTFYLTNDVSFLAHIQWMVM	DPB1-0401_DPA1-0103;DRB1_1202;DRB1_1201;DRB1_0302;DRB1_0804	0.705699298	0.688372315	0.259933893
orf1ab polyprotein	3111	3135	YLTFYLTNDVSFLAHIQWMVMFTPL	DPB1-0401_DPA1-0103;DRB1_1202;DRB1_1201;DRB1_0302;DRB1_0804	0.705699298	0.688372315	0.259933893
orf1a polyprotein	3111	3135	YLTFYLTNDVSFLAHIQWMVMFTPL	DPB1-0401_DPA1-0103;DRB1_1202;DRB1_1201;DRB1_0302;DRB1_0804	0.705699298	0.688372315	0.259933893
orf1a polyprotein	3112	3136	LTFYLTNDVSFLAHIQWMVMFTPLV	DPB1-0401_DPA1-0103;DRB1_1202;DRB1_1201;DRB1_0302;DRB1_0804	0.705699298	0.688372315	0.259933893
orf1a polyprotein	3110	3134	LYLTFYLTNDVSFLAHIQWMVMFTP	DPB1-0401_DPA1-0103;DRB1_1202;DRB1_1201;DRB1_0302;DRB1_0804	0.705699298	0.688372315	0.259933893
orf1ab polyprotein	3110	3134	LYLTFYLTNDVSFLAHIQWMVMFTP	DPB1-0401_DPA1-0103;DRB1_1202;DRB1_1201;DRB1_0302;DRB1_0804	0.705699298	0.688372315	0.259933893
orf1a polyprotein	3109	3133	YLYLTFYLTNDVSFLAHIQWMVMFT	DPB1-0401_DPA1-0103;DRB1_1202;DRB1_1201;DRB1_0302;DRB1_0804	0.705699298	0.688372315	0.259933893
orf1a polyprotein	3108	3132	IYLYLTFYLTNDVSFLAHIQWMVMF	DPB1-0401_DPA1-0103;DRB1_1202;DRB1_1201;DRB1_0302;DRB1_0804	0.705699298	0.688372315	0.259933893
orf1ab polyprotein	3108	3132	IYLYLTFYLTNDVSFLAHIQWMVMF	DPB1-0401_DPA1-0103;DRB1_1202;DRB1_1201;DRB1_0302;DRB1_0804	0.705699298	0.688372315	0.259933893
orf1a polyprotein	3558	3582	DVVRQCSGVTFQSAVKRTIKGTHHW	DRB1_0901;DRB5_0102;DRB1_1202;DRB5_0202;DRB5_0101;DRB1_1302;DPB1-0201_DPA1-0103	0.568307164	0.551542849	0.594721189
orf1ab polyprotein	3558	3582	DVVRQCSGVTFQSAVKRTIKGTHHW	DRB1_0901;DRB5_0102;DRB1_1202;DRB5_0202;DRB5_0101;DRB1_1302;DPB1-0201_DPA1-0103	0.568307164	0.551542849	0.594721189
orf1a polyprotein	2881	2905	FLHFLPRVFSAVGNICYTPSKLIEY	DQB1-0201_DQA1-0501;DRB1_1602;DRB1_0403;DRB1_0404;DRB1_1601;DRB1_0102;DRB1_0701;DQB1-0301_DQA1-0505	0.641133526	0.6454759	0.360495392
orf1ab polyprotein	2883	2907	HFLPRVFSAVGNICYTPSKLIEYTD	DQB1-0201_DQA1-0501;DRB1_1602;DRB1_0403;DRB1_0404;DRB1_1601;DRB1_0102;DRB1_0701;DQB1-0301_DQA1-0505	0.641133526	0.6454759	0.360495392
orf1a polyprotein	2882	2906	LHFLPRVFSAVGNICYTPSKLIEYT	DQB1-0201_DQA1-0501;DRB1_1602;DRB1_0403;DRB1_0404;DRB1_1601;DRB1_0102;DRB1_0701;DQB1-0301_DQA1-0505	0.641133526	0.6454759	0.360495392
orf1ab polyprotein	2881	2905	FLHFLPRVFSAVGNICYTPSKLIEY	DQB1-0201_DQA1-0501;DRB1_1602;DRB1_0403;DRB1_0404;DRB1_1601;DRB1_0102;DRB1_0701;DQB1-0301_DQA1-0505	0.641133526	0.6454759	0.360495392
orf1ab polyprotein	2882	2906	LHFLPRVFSAVGNICYTPSKLIEYT	DQB1-0201_DQA1-0501;DRB1_1602;DRB1_0403;DRB1_0404;DRB1_1601;DRB1_0102;DRB1_0701;DQB1-0301_DQA1-0505	0.641133526	0.6454759	0.360495392
orf1a polyprotein	2883	2907	HFLPRVFSAVGNICYTPSKLIEYTD	DQB1-0201_DQA1-0501;DRB1_1602;DRB1_0403;DRB1_0404;DRB1_1601;DRB1_0102;DRB1_0701;DQB1-0301_DQA1-0505	0.641133526	0.6454759	0.360495392
orf1ab polyprotein	6515	6539	IKPVPEVKILNNLGVDIAANTVIWD	DPB1-0101_DPA1-0202;DRB1_1602;DPB1-0101_DPA1-0201;DRB1_0404;DRB3_0202;DRB1_1601;DRB1_1202;DRB1_1201;DRB1_1501;DRB1_1404;DRB3_0301	0.622359673	0.636256454	0.409161804
orf1ab polyprotein	6514	6538	NIKPVPEVKILNNLGVDIAANTVIW	DPB1-0101_DPA1-0202;DRB1_1602;DPB1-0101_DPA1-0201;DRB1_0404;DRB3_0202;DRB1_1601;DRB1_1202;DRB1_1201;DRB1_1501;DRB1_1404;DRB3_0301	0.622359673	0.636256454	0.409161804
orf1ab polyprotein	6513	6537	RNIKPVPEVKILNNLGVDIAANTVI	DPB1-0101_DPA1-0202;DRB1_1602;DPB1-0101_DPA1-0201;DRB1_0404;DRB3_0202;DRB1_1601;DRB1_1202;DRB1_1201;DRB1_1501;DRB1_1404;DRB3_0301	0.622359673	0.636256454	0.409161804
orf1ab polyprotein	6512	6536	KRNIKPVPEVKILNNLGVDIAANTV	DPB1-0101_DPA1-0202;DRB1_1602;DPB1-0101_DPA1-0201;DRB1_0404;DRB3_0202;DRB1_1601;DRB1_1202;DRB1_1201;DRB1_1501;DRB1_1404;DRB3_0301	0.622359673	0.636256454	0.409161804
orf1ab polyprotein	3113	3137	TFYLTNDVSFLAHIQWMVMFTPLVP	DPB1-0401_DPA1-0103;DRB1_1201;DRB1_1202;DRB1_0804	0.699434811	0.688334325	0.259933893
orf1a polyprotein	3113	3137	TFYLTNDVSFLAHIQWMVMFTPLVP	DPB1-0401_DPA1-0103;DRB1_1201;DRB1_1202;DRB1_0804	0.699434811	0.688334325	0.259933893
orf1a polyprotein	3950	3974	SLPSYAAFATAQEAYEQAVANGDSE	DRB1_0410;DQB1-0502_DQA1-0102;DQB1-0302_DQA1-0301;DRB1_0901;DRB1_0405;DQB1-0301_DQA1-0505;DQB1-0202_DQA1-0201;DRB1_0801	0.607066982	0.597483955	0.493044779
orf1ab polyprotein	3950	3974	SLPSYAAFATAQEAYEQAVANGDSE	DRB1_0410;DQB1-0502_DQA1-0102;DQB1-0302_DQA1-0301;DRB1_0901;DRB1_0405;DQB1-0301_DQA1-0505;DQB1-0202_DQA1-0201;DRB1_0801	0.607066982	0.597483955	0.493044779
surface glycoprotein	1178	1202	NIQKEIDRLNEVAKNLNESLIDLQE	DPB1-1001_DPA1-0201;DPB1-1401_DPA1-0201;DQB1-0604_DQA1-0102;DPB1-1701_DPA1-0201;DPB1-0301_DPA1-0103;DPB1-0901_DPA1-0201;DRB4_0103;DRB3_0301	0.688900403	0.688900403	0.2079
surface glycoprotein	1180	1204	QKEIDRLNEVAKNLNESLIDLQELG	DPB1-1001_DPA1-0201;DPB1-1401_DPA1-0201;DQB1-0604_DQA1-0102;DPB1-1701_DPA1-0201;DPB1-0301_DPA1-0103;DPB1-0901_DPA1-0201;DRB4_0103;DRB3_0301	0.688900403	0.688900403	0.2079
surface glycoprotein	1179	1203	IQKEIDRLNEVAKNLNESLIDLQEL	DPB1-1001_DPA1-0201;DPB1-1401_DPA1-0201;DQB1-0604_DQA1-0102;DPB1-1701_DPA1-0201;DPB1-0301_DPA1-0103;DPB1-0901_DPA1-0201;DRB4_0103;DRB3_0301	0.688900403	0.688900403	0.2079
orf1ab polyprotein	4602	4626	QDLNGNWYDFGDFIQTTPGSGVPVV	DQB1-0502_DQA1-0102;DRB1_0407;DRB1_1101;DRB1_0701;DPB1-0402_DPA1-0103;DRB1_0804;DRB1_1404;DRB3_0301;DRB1_0802;DRB1_1001	0.58780436	0.563566095	0.528376788
orf1ab polyprotein	4601	4625	NQDLNGNWYDFGDFIQTTPGSGVPV	DQB1-0502_DQA1-0102;DRB1_0407;DRB1_1101;DRB1_0701;DPB1-0402_DPA1-0103;DRB1_0804;DRB1_1404;DRB3_0301;DRB1_0802;DRB1_1001	0.58780436	0.563566095	0.528376788
orf1ab polyprotein	1225	1249	RKQDDKKIKACVEEVTTTLEETKFL	DPB1-1001_DPA1-0201;DRB1_1503;DQB1-0602_DQA1-0102;DPB1-1301_DPA1-0201;DQB1-0302_DQA1-0301;DRB1_1202;DQB1-0604_DQA1-0102;DRB1_0411;DQB1-0202_DQA1-0201	0.669735477	0.650897791	0.331991156
orf1a polyprotein	1225	1249	RKQDDKKIKACVEEVTTTLEETKFL	DPB1-1001_DPA1-0201;DRB1_1503;DQB1-0602_DQA1-0102;DPB1-1301_DPA1-0201;DQB1-0302_DQA1-0301;DRB1_1202;DQB1-0604_DQA1-0102;DRB1_0411;DQB1-0202_DQA1-0201	0.669735477	0.650897791	0.331991156
orf1ab polyprotein	4764	4788	LVYAADPAMHAASGNLLLDKRTTCF	DPB1-0101_DPA1-0201;DRB1_0901;DRB1_0302;DRB1_0102;DRB1_1401;DRB1_0701;DRB1_0101;DQB1-0301_DQA1-0505	0.611856578	0.627666716	0.415646775
orf1ab polyprotein	4763	4787	LLVYAADPAMHAASGNLLLDKRTTC	DPB1-0101_DPA1-0201;DRB1_0901;DRB1_0302;DRB1_0102;DRB1_1401;DRB1_0701;DRB1_0101;DQB1-0301_DQA1-0505	0.611856578	0.627666716	0.415646775
orf1ab polyprotein	4281	4305	KDYLASGGQPITNCVKMLCTHTGTG	DRB1_1102;DPB1-0202_DPA1-0103;DRB1_0403;DRB1_0404;DRB1_0406;DRB1_1405;DRB1_1401;DPB1-0402_DPA1-0103;DRB1_0701;DRB1_0101;DRB1_1406	0.585666581	0.612404224	0.471133473
orf1a polyprotein	4281	4305	KDYLASGGQPITNCVKMLCTHTGTG	DRB1_1102;DPB1-0202_DPA1-0103;DRB1_0403;DRB1_0404;DRB1_0406;DRB1_1405;DRB1_1401;DPB1-0402_DPA1-0103;DRB1_0701;DRB1_0101;DRB1_1406	0.585666581	0.612404224	0.471133473
ORF3a protein	58	82	SASKIITLKKRWQLALSKGVHFVCN	DPB1-0101_DPA1-0202;DRB1_1102;DPB1-1401_DPA1-0201;DRB1_1301;DPB1-1301_DPA1-0201;DRB1_0901;DRB1_1601;DRB1_1202;DRB1_1401;DRB1_0701;DRB1_0804;DRB1_1404;DRB1_1104;DRB1_0802;DRB1_0801	0.551977451	0.537610097	0.588073917
ORF3a protein	57	81	QSASKIITLKKRWQLALSKGVHFVC	DPB1-0101_DPA1-0202;DRB1_1102;DPB1-1401_DPA1-0201;DRB1_1301;DPB1-1301_DPA1-0201;DRB1_0901;DRB1_1601;DRB1_1202;DRB1_1401;DRB1_0701;DRB1_0804;DRB1_1404;DRB1_1104;DRB1_0802;DRB1_0801	0.551977451	0.537610097	0.588073917
orf1a polyprotein	2622	2646	KNVSLDNVLSTFISAARQGFVDSDV	DPB1-0101_DPA1-0202;DQB1-0303_DQA1-0201;DQB1-0602_DQA1-0102;DRB1_0901;DPB1-0501_DPA1-0202;DRB5_0202;DRB1_1101;DRB1_1402	0.474544858	0.448998675	0.747189488
orf1ab polyprotein	2621	2645	AKNVSLDNVLSTFISAARQGFVDSD	DPB1-0101_DPA1-0202;DQB1-0303_DQA1-0201;DQB1-0602_DQA1-0102;DRB1_0901;DPB1-0501_DPA1-0202;DRB5_0202;DRB1_1101;DRB1_1402	0.474544858	0.448998675	0.747189488
orf1ab polyprotein	2622	2646	KNVSLDNVLSTFISAARQGFVDSDV	DPB1-0101_DPA1-0202;DQB1-0303_DQA1-0201;DQB1-0602_DQA1-0102;DRB1_0901;DPB1-0501_DPA1-0202;DRB5_0202;DRB1_1101;DRB1_1402	0.474544858	0.448998675	0.747189488
orf1a polyprotein	2621	2645	AKNVSLDNVLSTFISAARQGFVDSD	DPB1-0101_DPA1-0202;DQB1-0303_DQA1-0201;DQB1-0602_DQA1-0102;DRB1_0901;DPB1-0501_DPA1-0202;DRB5_0202;DRB1_1101;DRB1_1402	0.474544858	0.448998675	0.747189488
orf1ab polyprotein	2623	2647	NVSLDNVLSTFISAARQGFVDSDVE	DPB1-0101_DPA1-0202;DQB1-0303_DQA1-0201;DQB1-0602_DQA1-0102;DRB1_0901;DPB1-0501_DPA1-0202;DRB5_0202;DRB1_1101;DRB1_1402	0.474544858	0.448998675	0.747189488
orf1a polyprotein	2623	2647	NVSLDNVLSTFISAARQGFVDSDVE	DPB1-0101_DPA1-0202;DQB1-0303_DQA1-0201;DQB1-0602_DQA1-0102;DRB1_0901;DPB1-0501_DPA1-0202;DRB5_0202;DRB1_1101;DRB1_1402	0.474544858	0.448998675	0.747189488
orf1ab polyprotein	2624	2648	VSLDNVLSTFISAARQGFVDSDVET	DPB1-0101_DPA1-0202;DQB1-0303_DQA1-0201;DQB1-0602_DQA1-0102;DRB1_0901;DPB1-0501_DPA1-0202;DRB5_0202;DRB1_1101;DRB1_1402	0.474544858	0.448998675	0.747189488
orf1a polyprotein	2624	2648	VSLDNVLSTFISAARQGFVDSDVET	DPB1-0101_DPA1-0202;DQB1-0303_DQA1-0201;DQB1-0602_DQA1-0102;DRB1_0901;DPB1-0501_DPA1-0202;DRB5_0202;DRB1_1101;DRB1_1402	0.474544858	0.448998675	0.747189488
orf1ab polyprotein	5448	5472	NTCTERLKLFAAETLKATEETFKLS	DRB1_1503;DRB1_0404;DRB1_0403;DRB1_0407;DRB5_0202;DQB1-0501_DQA1-0101;DRB1_0406;DPB1-0402_DPA1-0103;DRB1_0402;DRB1_1501	0.616254678	0.620460685	0.415562005
orf1ab polyprotein	5447	5471	ANTCTERLKLFAAETLKATEETFKL	DRB1_1503;DRB1_0404;DRB1_0403;DRB1_0407;DRB5_0202;DQB1-0501_DQA1-0101;DRB1_0406;DPB1-0402_DPA1-0103;DRB1_0402;DRB1_1501	0.616254678	0.620460685	0.415562005
orf1ab polyprotein	5446	5470	LANTCTERLKLFAAETLKATEETFK	DRB1_1503;DRB1_0404;DRB1_0403;DRB1_0407;DRB5_0202;DQB1-0501_DQA1-0101;DRB1_0406;DPB1-0402_DPA1-0103;DRB1_0402;DRB1_1501	0.616254678	0.620460685	0.415562005
orf1a polyprotein	3898	3922	ILLAKDTTEAFEKMVSLLSVLLSMQ	DRB1_1602;DRB1_1102;DRB1_0401;DRB1_1601;DRB1_0407;DRB1_1101;DRB1_0404;DRB1_0101;DRB1_1001;DRB3_0101	0.649591338	0.676717011	0.275850059
orf1ab polyprotein	3898	3922	ILLAKDTTEAFEKMVSLLSVLLSMQ	DRB1_1602;DRB1_1102;DRB1_0401;DRB1_1601;DRB1_0407;DRB1_1101;DRB1_0404;DRB1_0101;DRB1_1001;DRB3_0101	0.649591338	0.676717011	0.275850059
orf1a polyprotein	679	703	FKLVNKFLALCADSIIIGGAKLKAL	DQB1-0201_DQA1-0501;DRB1_1502;DRB1_1601;DQB1-0604_DQA1-0102;DRB1_0701;DRB1_0101;DRB1_1001	0.582019415	0.614387357	0.469317705
orf1ab polyprotein	678	702	FFKLVNKFLALCADSIIIGGAKLKA	DQB1-0201_DQA1-0501;DRB1_1502;DRB1_1601;DQB1-0604_DQA1-0102;DRB1_0701;DRB1_0101;DRB1_1001	0.582019415	0.614387357	0.469317705
orf1ab polyprotein	677	701	TFFKLVNKFLALCADSIIIGGAKLK	DQB1-0201_DQA1-0501;DRB1_1502;DRB1_1601;DQB1-0604_DQA1-0102;DRB1_0701;DRB1_0101;DRB1_1001	0.582019415	0.614387357	0.469317705
orf1a polyprotein	677	701	TFFKLVNKFLALCADSIIIGGAKLK	DQB1-0201_DQA1-0501;DRB1_1502;DRB1_1601;DQB1-0604_DQA1-0102;DRB1_0701;DRB1_0101;DRB1_1001	0.582019415	0.614387357	0.469317705
orf1a polyprotein	678	702	FFKLVNKFLALCADSIIIGGAKLKA	DQB1-0201_DQA1-0501;DRB1_1502;DRB1_1601;DQB1-0604_DQA1-0102;DRB1_0701;DRB1_0101;DRB1_1001	0.582019415	0.614387357	0.469317705
orf1ab polyprotein	679	703	FKLVNKFLALCADSIIIGGAKLKAL	DQB1-0201_DQA1-0501;DRB1_1502;DRB1_1601;DQB1-0604_DQA1-0102;DRB1_0701;DRB1_0101;DRB1_1001	0.582019415	0.614387357	0.469317705
orf1a polyprotein	2167	2191	NYMPYFFTLLLQLCTFTRSTNSRIK	DQB1-0303_DQA1-0201;DRB1_1601;DRB1_0901;DRB5_0102;DRB5_0101;DRB1_0701;DRB1_0101	0.617352616	0.646190142	0.378315059
orf1ab polyprotein	2168	2192	YMPYFFTLLLQLCTFTRSTNSRIKA	DQB1-0303_DQA1-0201;DRB1_1601;DRB1_0901;DRB5_0102;DRB5_0101;DRB1_0701;DRB1_0101	0.617352616	0.646190142	0.378315059
orf1ab polyprotein	2169	2193	MPYFFTLLLQLCTFTRSTNSRIKAS	DQB1-0303_DQA1-0201;DRB1_1601;DRB1_0901;DRB5_0102;DRB5_0101;DRB1_0701;DRB1_0101	0.617352616	0.646190142	0.378315059
orf1a polyprotein	2168	2192	YMPYFFTLLLQLCTFTRSTNSRIKA	DQB1-0303_DQA1-0201;DRB1_1601;DRB1_0901;DRB5_0102;DRB5_0101;DRB1_0701;DRB1_0101	0.617352616	0.646190142	0.378315059
orf1ab polyprotein	2167	2191	NYMPYFFTLLLQLCTFTRSTNSRIK	DQB1-0303_DQA1-0201;DRB1_1601;DRB1_0901;DRB5_0102;DRB5_0101;DRB1_0701;DRB1_0101	0.617352616	0.646190142	0.378315059
orf1a polyprotein	2169	2193	MPYFFTLLLQLCTFTRSTNSRIKAS	DQB1-0303_DQA1-0201;DRB1_1601;DRB1_0901;DRB5_0102;DRB5_0101;DRB1_0701;DRB1_0101	0.617352616	0.646190142	0.378315059
orf1ab polyprotein	2619	2643	ELAKNVSLDNVLSTFISAARQGFVD	DPB1-0101_DPA1-0202;DQB1-0303_DQA1-0201;DQB1-0602_DQA1-0102;DRB1_0301;DPB1-0501_DPA1-0202;DRB5_0202;DRB1_1402	0.509165091	0.522289639	0.684435178
orf1a polyprotein	2619	2643	ELAKNVSLDNVLSTFISAARQGFVD	DPB1-0101_DPA1-0202;DQB1-0303_DQA1-0201;DQB1-0602_DQA1-0102;DRB1_0301;DPB1-0501_DPA1-0202;DRB5_0202;DRB1_1402	0.509165091	0.522289639	0.684435178
orf1ab polyprotein	2354	2378	FAVHFISNSWLMWLIINLVQMAPIS	DPB1-0401_DPA1-0103;DRB1_0406;DRB3_0201;DRB1_0302;DRB1_1404;DRB3_0301	0.713536879	0.705831757	0.154186858
orf1a polyprotein	2354	2378	FAVHFISNSWLMWLIINLVQMAPIS	DPB1-0401_DPA1-0103;DRB1_0406;DRB3_0201;DRB1_0302;DRB1_1404;DRB3_0301	0.713536879	0.705831757	0.154186858
orf1ab polyprotein	2207	2231	GKFCLEASFNYLKSPNFSKLINIII	DRB1_1602;DRB1_1502;DRB1_1601;DRB5_0102;DRB1_1202;DRB1_1201;DRB5_0101;DRB1_1402;DPB1-0402_DPA1-0103;DRB1_0101	0.595737228	0.595268121	0.488970748
orf1ab polyprotein	2208	2232	KFCLEASFNYLKSPNFSKLINIIIW	DRB1_1602;DRB1_1502;DRB1_1601;DRB5_0102;DRB1_1202;DRB1_1201;DRB5_0101;DRB1_1402;DPB1-0402_DPA1-0103;DRB1_0101	0.595737228	0.595268121	0.488970748
orf1a polyprotein	2208	2232	KFCLEASFNYLKSPNFSKLINIIIW	DRB1_1602;DRB1_1502;DRB1_1601;DRB5_0102;DRB1_1202;DRB1_1201;DRB5_0101;DRB1_1402;DPB1-0402_DPA1-0103;DRB1_0101	0.595737228	0.595268121	0.488970748
orf1a polyprotein	2209	2233	FCLEASFNYLKSPNFSKLINIIIWF	DRB1_1602;DRB1_1502;DRB1_1601;DRB5_0102;DRB1_1202;DRB1_1201;DRB5_0101;DRB1_1402;DPB1-0402_DPA1-0103;DRB1_0101	0.595737228	0.595268121	0.488970748
orf1ab polyprotein	2209	2233	FCLEASFNYLKSPNFSKLINIIIWF	DRB1_1602;DRB1_1502;DRB1_1601;DRB5_0102;DRB1_1202;DRB1_1201;DRB5_0101;DRB1_1402;DPB1-0402_DPA1-0103;DRB1_0101	0.595737228	0.595268121	0.488970748
orf1a polyprotein	2207	2231	GKFCLEASFNYLKSPNFSKLINIII	DRB1_1602;DRB1_1502;DRB1_1601;DRB5_0102;DRB1_1202;DRB1_1201;DRB5_0101;DRB1_1402;DPB1-0402_DPA1-0103;DRB1_0101	0.595737228	0.595268121	0.488970748
orf1a polyprotein	2728	2752	QIRSAAKKNNLPFKLTCATTRQVVN	DRB1_0901;DRB5_0101;DRB1_0701;DPB1-0901_DPA1-0201;DQB1-0301_DQA1-0505	0.599559386	0.604411476	0.472342749
orf1ab polyprotein	2728	2752	QIRSAAKKNNLPFKLTCATTRQVVN	DRB1_0901;DRB5_0101;DRB1_0701;DPB1-0901_DPA1-0201;DQB1-0301_DQA1-0505	0.599559386	0.604411476	0.472342749
surface glycoprotein	629	653	LTPTWRVYSTGSNVFQTRAGCLIGA	DQB1-0401_DQA1-0301;DPB1-1401_DPA1-0201;DRB1_1502;DQB1-0602_DQA1-0102;DRB1_0701;DQB1-0202_DQA1-0201;DPB1-0601_DPA1-0103	0.615596522	0.624260107	0.415986493
surface glycoprotein	630	654	TPTWRVYSTGSNVFQTRAGCLIGAE	DQB1-0401_DQA1-0301;DPB1-1401_DPA1-0201;DRB1_1502;DQB1-0602_DQA1-0102;DRB1_0701;DQB1-0202_DQA1-0201;DPB1-0601_DPA1-0103	0.615596522	0.624260107	0.415986493
surface glycoprotein	628	652	QLTPTWRVYSTGSNVFQTRAGCLIG	DQB1-0401_DQA1-0301;DPB1-1401_DPA1-0201;DRB1_1502;DQB1-0602_DQA1-0102;DRB1_0701;DQB1-0202_DQA1-0201;DPB1-0601_DPA1-0103	0.615596522	0.624260107	0.415986493
orf1ab polyprotein	2702	2726	QVAKSHNIALIWNVKDFMSLSEQLR	DRB1_0410;DPB1-0202_DPA1-0103;DQB1-0302_DQA1-0301;DRB1_0411;DPB1-1101_DPA1-0201;DPB1-0201_DPA1-0103;DQB1-0603_DQA1-0103;DQB1-0202_DQA1-0201	0.616658289	0.61247129	0.435337926
orf1a polyprotein	2702	2726	QVAKSHNIALIWNVKDFMSLSEQLR	DRB1_0410;DPB1-0202_DPA1-0103;DQB1-0302_DQA1-0301;DRB1_0411;DPB1-1101_DPA1-0201;DPB1-0201_DPA1-0103;DQB1-0603_DQA1-0103;DQB1-0202_DQA1-0201	0.616658289	0.61247129	0.435337926
orf1a polyprotein	1332	1356	QGLNGYTVEEAKTVLKKCKSAFYIL	DQB1-0201_DQA1-0501;DQB1-0401_DQA1-0301;DRB1_1202;DQB1-0402_DQA1-0401;DRB5_0101;DPB1-0901_DPA1-0201;DRB1_1404;DRB1_0101	0.576518378	0.590569686	0.509663889
orf1ab polyprotein	1332	1356	QGLNGYTVEEAKTVLKKCKSAFYIL	DQB1-0201_DQA1-0501;DQB1-0401_DQA1-0301;DRB1_1202;DQB1-0402_DQA1-0401;DRB5_0101;DPB1-0901_DPA1-0201;DRB1_1404;DRB1_0101	0.576518378	0.590569686	0.509663889
orf1a polyprotein	1323	1347	DNYITTYPGQGLNGYTVEEAKTVLK	DQB1-0201_DQA1-0501;DQB1-0401_DQA1-0301;DQB1-0303_DQA1-0201;DQB1-0502_DQA1-0102;DRB5_0202;DQB1-0501_DQA1-0101;DQB1-0402_DQA1-0401;DRB1_0101	0.603677776	0.622477739	0.418601558
orf1ab polyprotein	1323	1347	DNYITTYPGQGLNGYTVEEAKTVLK	DQB1-0201_DQA1-0501;DQB1-0401_DQA1-0301;DQB1-0303_DQA1-0201;DQB1-0502_DQA1-0102;DRB5_0202;DQB1-0501_DQA1-0101;DQB1-0402_DQA1-0401;DRB1_0101	0.603677776	0.622477739	0.418601558
orf1ab polyprotein	2353	2377	YFAVHFISNSWLMWLIINLVQMAPI	DPB1-0401_DPA1-0103;DRB1_0406;DRB3_0201;DRB1_1404;DRB3_0301	0.707623066	0.705796433	0.154186858
orf1ab polyprotein	2352	2376	SYFAVHFISNSWLMWLIINLVQMAP	DPB1-0401_DPA1-0103;DRB1_0406;DRB3_0201;DRB1_1404;DRB3_0301	0.707623066	0.705796433	0.154186858
orf1a polyprotein	2352	2376	SYFAVHFISNSWLMWLIINLVQMAP	DPB1-0401_DPA1-0103;DRB1_0406;DRB3_0201;DRB1_1404;DRB3_0301	0.707623066	0.705796433	0.154186858
orf1a polyprotein	2353	2377	YFAVHFISNSWLMWLIINLVQMAPI	DPB1-0401_DPA1-0103;DRB1_0406;DRB3_0201;DRB1_1404;DRB3_0301	0.707623066	0.705796433	0.154186858
orf1a polyprotein	2884	2908	FLPRVFSAVGNICYTPSKLIEYTDF	DQB1-0201_DQA1-0501;DRB1_1503;DRB1_1602;DRB1_0403;DRB1_0404;DRB1_1601;DRB1_0701;DQB1-0301_DQA1-0505	0.637529021	0.630226941	0.360929454
orf1ab polyprotein	2884	2908	FLPRVFSAVGNICYTPSKLIEYTDF	DQB1-0201_DQA1-0501;DRB1_1503;DRB1_1602;DRB1_0403;DRB1_0404;DRB1_1601;DRB1_0701;DQB1-0301_DQA1-0505	0.637529021	0.630226941	0.360929454
orf1ab polyprotein	2885	2909	LPRVFSAVGNICYTPSKLIEYTDFA	DQB1-0201_DQA1-0501;DRB1_1503;DRB1_1602;DRB1_0403;DRB1_0404;DRB1_1601;DRB1_0701;DQB1-0301_DQA1-0505	0.637529021	0.630226941	0.360929454
orf1a polyprotein	2885	2909	LPRVFSAVGNICYTPSKLIEYTDFA	DQB1-0201_DQA1-0501;DRB1_1503;DRB1_1602;DRB1_0403;DRB1_0404;DRB1_1601;DRB1_0701;DQB1-0301_DQA1-0505	0.637529021	0.630226941	0.360929454
orf1a polyprotein	2033	2057	AQGMDNLACEDLKPVSEEVVENPTI	DQB1-0201_DQA1-0501;DRB1_1503;DPB1-0202_DPA1-0103;DPB1-0402_DPA1-0103;DPB1-0201_DPA1-0103	0.576731867	0.561452904	0.523383378
orf1ab polyprotein	2033	2057	AQGMDNLACEDLKPVSEEVVENPTI	DQB1-0201_DQA1-0501;DRB1_1503;DPB1-0202_DPA1-0103;DPB1-0402_DPA1-0103;DPB1-0201_DPA1-0103	0.576731867	0.561452904	0.523383378
surface glycoprotein	754	778	LQYGSFCTQLNRALTGIAVEQDKNT	DPB1-0101_DPA1-0202;DRB1_1602;DQB1-0602_DQA1-0102;DQB1-0502_DQA1-0102;DRB1_1502;DPB1-0101_DPA1-0103;DQB1-0302_DQA1-0301;DQB1-0604_DQA1-0102;DQB1-0303_DQA1-0301	0.516741233	0.497815464	0.63670606
surface glycoprotein	753	777	LLQYGSFCTQLNRALTGIAVEQDKN	DPB1-0101_DPA1-0202;DRB1_1602;DQB1-0602_DQA1-0102;DQB1-0502_DQA1-0102;DRB1_1502;DPB1-0101_DPA1-0103;DQB1-0302_DQA1-0301;DQB1-0604_DQA1-0102;DQB1-0303_DQA1-0301	0.516741233	0.497815464	0.63670606
surface glycoprotein	1005	1029	QTYVTQQLIRAAEIRASANLAATKM	DQB1-0602_DQA1-0102;DRB1_0403;DRB1_0404;DRB1_0407;DRB1_0406;DRB1_0402;DRB1_1501;DQB1-0301_DQA1-0505	0.634052063	0.653480679	0.326164366
surface glycoprotein	1006	1030	TYVTQQLIRAAEIRASANLAATKMS	DQB1-0602_DQA1-0102;DRB1_0403;DRB1_0404;DRB1_0407;DRB1_0406;DRB1_0402;DRB1_1501;DQB1-0301_DQA1-0505	0.634052063	0.653480679	0.326164366
surface glycoprotein	1004	1028	LQTYVTQQLIRAAEIRASANLAATK	DQB1-0602_DQA1-0102;DRB1_0403;DRB1_0404;DRB1_0407;DRB1_0406;DRB1_0402;DRB1_1501;DQB1-0301_DQA1-0505	0.634052063	0.653480679	0.326164366
surface glycoprotein	1007	1031	YVTQQLIRAAEIRASANLAATKMSE	DQB1-0602_DQA1-0102;DRB1_0403;DRB1_0404;DRB1_0407;DRB1_0406;DRB1_0402;DRB1_1501;DQB1-0301_DQA1-0505	0.634052063	0.653480679	0.326164366
orf1a polyprotein	1833	1857	CGHYKHITSKETLYCIDGALLTKSS	DRB1_1602;DRB1_1502;DRB1_0701;DRB1_0402;DRB1_0804;DRB1_1404;DRB1_0101;DRB3_0101	0.604809169	0.620876813	0.413044823
orf1ab polyprotein	1833	1857	CGHYKHITSKETLYCIDGALLTKSS	DRB1_1602;DRB1_1502;DRB1_0701;DRB1_0402;DRB1_0804;DRB1_1404;DRB1_0101;DRB3_0101	0.604809169	0.620876813	0.413044823
surface glycoprotein	322	346	PTESIVRFPNITNLCPFGEVFNATR	DQB1-0201_DQA1-0501;DRB1_1502;DQB1-0302_DQA1-0301;DPB1-1101_DPA1-0201;DRB1_0402;DRB1_1501	0.572503691	0.599880229	0.475545223
orf1a polyprotein	680	704	KLVNKFLALCADSIIIGGAKLKALN	DQB1-0201_DQA1-0501;DRB1_1502;DQB1-0604_DQA1-0102;DRB1_0701;DRB1_0101;DRB1_1001	0.573200401	0.60331398	0.468935797
orf1ab polyprotein	680	704	KLVNKFLALCADSIIIGGAKLKALN	DQB1-0201_DQA1-0501;DRB1_1502;DQB1-0604_DQA1-0102;DRB1_0701;DRB1_0101;DRB1_1001	0.573200401	0.60331398	0.468935797
ORF3a protein	51	75	ALLAVFQSASKIITLKKRWQLALSK	DRB1_1102;DPB1-1401_DPA1-0201;DRB1_1301;DPB1-0501_DPA1-0202;DRB1_1101;DRB1_1202;DRB1_1401;DRB1_0804;DRB1_1404;DRB1_1104;DRB1_0802;DRB1_1406;DRB1_0801	0.426416813	0.397669471	0.769322438
orf1ab polyprotein	5474	5498	GIATVREVLSDRELHLSWEVGKPRP	DRB1_1503;DQB1-0502_DQA1-0102;DRB1_0301;DQB1-0302_DQA1-0301;DQB1-0201_DQA1-0201;DRB3_0301;DQB1-0202_DQA1-0201;DPB1-0601_DPA1-0103	0.592812164	0.597603245	0.448234014
orf1ab polyprotein	5475	5499	IATVREVLSDRELHLSWEVGKPRPP	DRB1_1503;DQB1-0502_DQA1-0102;DRB1_0301;DQB1-0302_DQA1-0301;DQB1-0201_DQA1-0201;DRB3_0301;DQB1-0202_DQA1-0201;DPB1-0601_DPA1-0103	0.592812164	0.597603245	0.448234014
orf1ab polyprotein	5473	5497	YGIATVREVLSDRELHLSWEVGKPR	DRB1_1503;DQB1-0502_DQA1-0102;DRB1_0301;DQB1-0302_DQA1-0301;DQB1-0201_DQA1-0201;DRB3_0301;DQB1-0202_DQA1-0201;DPB1-0601_DPA1-0103	0.592812164	0.597603245	0.448234014
orf1a polyprotein	1547	1571	DGEVITFDNLKTLLSLREVRTIKVF	DPB1-1001_DPA1-0201;DRB1_1503;DRB1_0410;DQB1-0303_DQA1-0201;DRB1_0401;DRB1_0411;DPB1-1101_DPA1-0201;DRB1_0405;DRB1_1501;DRB3_0101	0.638355933	0.666411825	0.272032696
orf1ab polyprotein	1547	1571	DGEVITFDNLKTLLSLREVRTIKVF	DPB1-1001_DPA1-0201;DRB1_1503;DRB1_0410;DQB1-0303_DQA1-0201;DRB1_0401;DRB1_0411;DPB1-1101_DPA1-0201;DRB1_0405;DRB1_1501;DRB3_0101	0.638355933	0.666411825	0.272032696
orf1ab polyprotein	1355	1379	ILPSIISNEKQEILGTVSWNLREML	DQB1-0201_DQA1-0501;DQB1-0401_DQA1-0301;DRB1_1301;DRB1_1405;DRB1_0406;DRB1_1402;DRB1_0302;DRB1_0701;DRB1_1401;DRB1_1404;DRB3_0301;DRB1_1406	0.582949179	0.584275504	0.475156549
orf1a polyprotein	1356	1380	LPSIISNEKQEILGTVSWNLREMLA	DQB1-0201_DQA1-0501;DQB1-0401_DQA1-0301;DRB1_1301;DRB1_1405;DRB1_0406;DRB1_1402;DRB1_0302;DRB1_0701;DRB1_1401;DRB1_1404;DRB3_0301;DRB1_1406	0.582949179	0.584275504	0.475156549
orf1ab polyprotein	1356	1380	LPSIISNEKQEILGTVSWNLREMLA	DQB1-0201_DQA1-0501;DQB1-0401_DQA1-0301;DRB1_1301;DRB1_1405;DRB1_0406;DRB1_1402;DRB1_0302;DRB1_0701;DRB1_1401;DRB1_1404;DRB3_0301;DRB1_1406	0.582949179	0.584275504	0.475156549
orf1a polyprotein	1355	1379	ILPSIISNEKQEILGTVSWNLREML	DQB1-0201_DQA1-0501;DQB1-0401_DQA1-0301;DRB1_1301;DRB1_1405;DRB1_0406;DRB1_1402;DRB1_0302;DRB1_0701;DRB1_1401;DRB1_1404;DRB3_0301;DRB1_1406	0.582949179	0.584275504	0.475156549
orf1ab polyprotein	4600	4624	DNQDLNGNWYDFGDFIQTTPGSGVP	DQB1-0502_DQA1-0102;DRB1_0407;DRB1_1101;DRB1_0701;DPB1-0402_DPA1-0103;DRB1_0804;DRB1_1404;DRB3_0301;DRB1_1001	0.572482831	0.563288633	0.512930226
orf1ab polyprotein	5631	5655	TACSHAAVDALCEKALKYLPIDKCS	DRB1_1503;DRB1_1202;DPB1-0201_DPA1-0103;DRB4_0103	0.620221165	0.602043773	0.440994595
ORF9b protein	37	61	VGPKVYPIILRLGSPLSLNMARKTL	DPB1-0601_DPA1-0103;DQB1-0602_DQA1-0102;DRB1_0102;DRB1_0401;DPB1-1401_DPA1-0201;DPB1-0301_DPA1-0103;DPB1-0901_DPA1-0201;DPB1-1001_DPA1-0201;DRB1_1101	0.612377662	0.632249205	0.367707285
ORF9b protein	36	60	NVGPKVYPIILRLGSPLSLNMARKT	DPB1-0601_DPA1-0103;DQB1-0602_DQA1-0102;DRB1_0102;DRB1_0401;DPB1-1401_DPA1-0201;DPB1-0301_DPA1-0103;DPB1-0901_DPA1-0201;DPB1-1001_DPA1-0201;DRB1_1101	0.612377662	0.632249205	0.367707285
orf1ab polyprotein	6752	6776	DDFVEIIKSQDLSVVSKVVKVTIDY	DRB1_1602;DRB1_1303;DRB1_1402;DRB1_0701;DPB1-0402_DPA1-0103;DRB1_1501;DRB1_0802	0.585609602	0.60783256	0.438520137
orf1ab polyprotein	2177	2201	LQLCTFTRSTNSRIKASMPTTIAKN	DQB1-0602_DQA1-0102;DRB1_1601;DRB1_0901;DRB1_0701;DRB3_0301;DRB1_0101	0.586569977	0.61772738	0.422270671
orf1a polyprotein	2176	2200	LLQLCTFTRSTNSRIKASMPTTIAK	DQB1-0602_DQA1-0102;DRB1_1601;DRB1_0901;DRB1_0701;DRB3_0301;DRB1_0101	0.586569977	0.61772738	0.422270671
orf1ab polyprotein	2176	2200	LLQLCTFTRSTNSRIKASMPTTIAK	DQB1-0602_DQA1-0102;DRB1_1601;DRB1_0901;DRB1_0701;DRB3_0301;DRB1_0101	0.586569977	0.61772738	0.422270671
orf1a polyprotein	2177	2201	LQLCTFTRSTNSRIKASMPTTIAKN	DQB1-0602_DQA1-0102;DRB1_1601;DRB1_0901;DRB1_0701;DRB3_0301;DRB1_0101	0.586569977	0.61772738	0.422270671
orf1a polyprotein	2178	2202	QLCTFTRSTNSRIKASMPTTIAKNT	DQB1-0602_DQA1-0102;DRB1_1601;DRB1_0901;DRB1_0701;DRB3_0301;DRB1_0101	0.586569977	0.61772738	0.422270671
orf1ab polyprotein	2178	2202	QLCTFTRSTNSRIKASMPTTIAKNT	DQB1-0602_DQA1-0102;DRB1_1601;DRB1_0901;DRB1_0701;DRB3_0301;DRB1_0101	0.586569977	0.61772738	0.422270671
orf1ab polyprotein	6511	6535	AKRNIKPVPEVKILNNLGVDIAANT	DPB1-0101_DPA1-0202;DRB1_1602;DPB1-0101_DPA1-0201;DRB1_0404;DRB3_0202;DRB1_1601;DRB1_1202;DRB1_1201;DPB1-1101_DPA1-0201;DRB1_1501;DRB1_1404	0.602059024	0.616560615	0.409161804
orf1a polyprotein	1317	1341	LRKVPTDNYITTYPGQGLNGYTVEE	DRB1_1503;DQB1-0602_DQA1-0102;DQB1-0303_DQA1-0201;DRB1_1502;DRB5_0202;DRB1_1101;DRB1_1501;DRB1_0802	0.598129014	0.593752162	0.441611101
orf1ab polyprotein	1318	1342	RKVPTDNYITTYPGQGLNGYTVEEA	DRB1_1503;DQB1-0602_DQA1-0102;DQB1-0303_DQA1-0201;DRB1_1502;DRB5_0202;DRB1_1101;DRB1_1501;DRB1_0802	0.598129014	0.593752162	0.441611101
orf1a polyprotein	1315	1339	KALRKVPTDNYITTYPGQGLNGYTV	DRB1_1503;DQB1-0602_DQA1-0102;DQB1-0303_DQA1-0201;DRB1_1502;DRB5_0202;DRB1_1101;DRB1_1501;DRB1_0802	0.598129014	0.593752162	0.441611101
orf1ab polyprotein	1317	1341	LRKVPTDNYITTYPGQGLNGYTVEE	DRB1_1503;DQB1-0602_DQA1-0102;DQB1-0303_DQA1-0201;DRB1_1502;DRB5_0202;DRB1_1101;DRB1_1501;DRB1_0802	0.598129014	0.593752162	0.441611101
orf1ab polyprotein	1315	1339	KALRKVPTDNYITTYPGQGLNGYTV	DRB1_1503;DQB1-0602_DQA1-0102;DQB1-0303_DQA1-0201;DRB1_1502;DRB5_0202;DRB1_1101;DRB1_1501;DRB1_0802	0.598129014	0.593752162	0.441611101
orf1a polyprotein	1316	1340	ALRKVPTDNYITTYPGQGLNGYTVE	DRB1_1503;DQB1-0602_DQA1-0102;DQB1-0303_DQA1-0201;DRB1_1502;DRB5_0202;DRB1_1101;DRB1_1501;DRB1_0802	0.598129014	0.593752162	0.441611101
orf1a polyprotein	1318	1342	RKVPTDNYITTYPGQGLNGYTVEEA	DRB1_1503;DQB1-0602_DQA1-0102;DQB1-0303_DQA1-0201;DRB1_1502;DRB5_0202;DRB1_1101;DRB1_1501;DRB1_0802	0.598129014	0.593752162	0.441611101
orf1ab polyprotein	1316	1340	ALRKVPTDNYITTYPGQGLNGYTVE	DRB1_1503;DQB1-0602_DQA1-0102;DQB1-0303_DQA1-0201;DRB1_1502;DRB5_0202;DRB1_1101;DRB1_1501;DRB1_0802	0.598129014	0.593752162	0.441611101
orf1ab polyprotein	5970	5994	IPKDMTYRRLISMMGFKMNYQVNGY	DRB1_1602;DRB1_0401;DRB1_1601;DRB1_0407;DRB1_1101;DRB5_0102;DRB3_0202;DRB1_0803;DRB1_0102;DRB1_0804;DRB1_0101	0.632852465	0.652875553	0.29591119
ORF9b protein	34	58	QNNVGPKVYPIILRLGSPLSLNMAR	DPB1-1301_DPA1-0201;DRB1_0102;DQB1-0602_DQA1-0102;DRB1_0401;DPB1-1401_DPA1-0201;DPB1-0301_DPA1-0103;DPB1-0901_DPA1-0201;DPB1-1001_DPA1-0201;DRB1_1101	0.608210253	0.628295439	0.367707285
orf1ab polyprotein	3951	3975	LPSYAAFATAQEAYEQAVANGDSEV	DRB1_0410;DQB1-0502_DQA1-0102;DQB1-0302_DQA1-0301;DRB1_0901;DRB1_0405;DQB1-0301_DQA1-0505;DQB1-0202_DQA1-0201	0.592848023	0.577519063	0.487546007
orf1a polyprotein	3951	3975	LPSYAAFATAQEAYEQAVANGDSEV	DRB1_0410;DQB1-0502_DQA1-0102;DQB1-0302_DQA1-0301;DRB1_0901;DRB1_0405;DQB1-0301_DQA1-0505;DQB1-0202_DQA1-0201	0.592848023	0.577519063	0.487546007
orf1a polyprotein	3250	3274	YQPPQTSITSAVLQSGFRKMAFPSG	DQB1-0602_DQA1-0102;DQB1-0601_DQA1-0103;DPB1-0201_DPA1-0103;DQB1-0301_DQA1-0501;DQB1-0301_DQA1-0601	0.445675127	0.445675127	0.70692935
orf1a polyprotein	3251	3275	QPPQTSITSAVLQSGFRKMAFPSGK	DQB1-0602_DQA1-0102;DQB1-0601_DQA1-0103;DPB1-0201_DPA1-0103;DQB1-0301_DQA1-0501;DQB1-0301_DQA1-0601	0.445675127	0.445675127	0.70692935
orf1ab polyprotein	3248	3272	VLYQPPQTSITSAVLQSGFRKMAFP	DQB1-0602_DQA1-0102;DQB1-0601_DQA1-0103;DPB1-0201_DPA1-0103;DQB1-0301_DQA1-0501;DQB1-0301_DQA1-0601	0.445675127	0.445675127	0.70692935
orf1a polyprotein	3246	3270	SDVLYQPPQTSITSAVLQSGFRKMA	DQB1-0602_DQA1-0102;DQB1-0601_DQA1-0103;DPB1-0201_DPA1-0103;DQB1-0301_DQA1-0501;DQB1-0301_DQA1-0601	0.445675127	0.445675127	0.70692935
orf1a polyprotein	3249	3273	LYQPPQTSITSAVLQSGFRKMAFPS	DQB1-0602_DQA1-0102;DQB1-0601_DQA1-0103;DPB1-0201_DPA1-0103;DQB1-0301_DQA1-0501;DQB1-0301_DQA1-0601	0.445675127	0.445675127	0.70692935
orf1ab polyprotein	3250	3274	YQPPQTSITSAVLQSGFRKMAFPSG	DQB1-0602_DQA1-0102;DQB1-0601_DQA1-0103;DPB1-0201_DPA1-0103;DQB1-0301_DQA1-0501;DQB1-0301_DQA1-0601	0.445675127	0.445675127	0.70692935
orf1a polyprotein	3248	3272	VLYQPPQTSITSAVLQSGFRKMAFP	DQB1-0602_DQA1-0102;DQB1-0601_DQA1-0103;DPB1-0201_DPA1-0103;DQB1-0301_DQA1-0501;DQB1-0301_DQA1-0601	0.445675127	0.445675127	0.70692935
orf1ab polyprotein	3251	3275	QPPQTSITSAVLQSGFRKMAFPSGK	DQB1-0602_DQA1-0102;DQB1-0601_DQA1-0103;DPB1-0201_DPA1-0103;DQB1-0301_DQA1-0501;DQB1-0301_DQA1-0601	0.445675127	0.445675127	0.70692935
orf1ab polyprotein	3249	3273	LYQPPQTSITSAVLQSGFRKMAFPS	DQB1-0602_DQA1-0102;DQB1-0601_DQA1-0103;DPB1-0201_DPA1-0103;DQB1-0301_DQA1-0501;DQB1-0301_DQA1-0601	0.445675127	0.445675127	0.70692935
orf1ab polyprotein	3247	3271	DVLYQPPQTSITSAVLQSGFRKMAF	DQB1-0602_DQA1-0102;DQB1-0601_DQA1-0103;DPB1-0201_DPA1-0103;DQB1-0301_DQA1-0501;DQB1-0301_DQA1-0601	0.445675127	0.445675127	0.70692935
orf1ab polyprotein	3246	3270	SDVLYQPPQTSITSAVLQSGFRKMA	DQB1-0602_DQA1-0102;DQB1-0601_DQA1-0103;DPB1-0201_DPA1-0103;DQB1-0301_DQA1-0501;DQB1-0301_DQA1-0601	0.445675127	0.445675127	0.70692935
orf1a polyprotein	3247	3271	DVLYQPPQTSITSAVLQSGFRKMAF	DQB1-0602_DQA1-0102;DQB1-0601_DQA1-0103;DPB1-0201_DPA1-0103;DQB1-0301_DQA1-0501;DQB1-0301_DQA1-0601	0.445675127	0.445675127	0.70692935
orf1ab polyprotein	2616	2640	AEAELAKNVSLDNVLSTFISAARQG	DPB1-0101_DPA1-0202;DQB1-0303_DQA1-0201;DQB1-0602_DQA1-0102;DRB1_0301;DPB1-0501_DPA1-0202	0.486091321	0.504616331	0.684248345
orf1a polyprotein	2616	2640	AEAELAKNVSLDNVLSTFISAARQG	DPB1-0101_DPA1-0202;DQB1-0303_DQA1-0201;DQB1-0602_DQA1-0102;DRB1_0301;DPB1-0501_DPA1-0202	0.486091321	0.504616331	0.684248345
orf1a polyprotein	2618	2642	AELAKNVSLDNVLSTFISAARQGFV	DPB1-0101_DPA1-0202;DQB1-0303_DQA1-0201;DQB1-0602_DQA1-0102;DRB1_0301;DPB1-0501_DPA1-0202	0.486091321	0.504616331	0.684248345
orf1a polyprotein	2617	2641	EAELAKNVSLDNVLSTFISAARQGF	DPB1-0101_DPA1-0202;DQB1-0303_DQA1-0201;DQB1-0602_DQA1-0102;DRB1_0301;DPB1-0501_DPA1-0202	0.486091321	0.504616331	0.684248345
orf1ab polyprotein	2617	2641	EAELAKNVSLDNVLSTFISAARQGF	DPB1-0101_DPA1-0202;DQB1-0303_DQA1-0201;DQB1-0602_DQA1-0102;DRB1_0301;DPB1-0501_DPA1-0202	0.486091321	0.504616331	0.684248345
orf1ab polyprotein	2618	2642	AELAKNVSLDNVLSTFISAARQGFV	DPB1-0101_DPA1-0202;DQB1-0303_DQA1-0201;DQB1-0602_DQA1-0102;DRB1_0301;DPB1-0501_DPA1-0202	0.486091321	0.504616331	0.684248345
surface glycoprotein	625	649	HADQLTPTWRVYSTGSNVFQTRAGC	DQB1-0401_DQA1-0301;DPB1-1401_DPA1-0201;DRB1_1502;DQB1-0602_DQA1-0102;DRB1_1101;DRB1_1401;DRB1_0804;DRB1_1104;DQB1-0202_DQA1-0201;DPB1-0601_DPA1-0103	0.608420729	0.603076163	0.415595741
orf1a polyprotein	4128	4152	VTALRANSAVKLQNNELSPVALRQM	DRB3_0202;DRB3_0201;DRB3_0301;DRB4_0103	0.736831	0.736831	0.0
orf1ab polyprotein	4128	4152	VTALRANSAVKLQNNELSPVALRQM	DRB3_0202;DRB3_0201;DRB3_0301;DRB4_0103	0.736831	0.736831	0.0
orf1ab polyprotein	5431	5455	NAIATCDWTNAGDYILANTCTERLK	DRB3_0202;DRB5_0101;DRB3_0201;DRB1_1402;DRB1_0803;DRB1_0405;DRB1_1406;DQB1-0202_DQA1-0201;DRB1_0801	0.676368703	0.667590003	0.22094663
orf1ab polyprotein	5432	5456	AIATCDWTNAGDYILANTCTERLKL	DRB3_0202;DRB5_0101;DRB3_0201;DRB1_1402;DRB1_0803;DRB1_0405;DRB1_1406;DQB1-0202_DQA1-0201;DRB1_0801	0.676368703	0.667590003	0.22094663
orf1ab polyprotein	5434	5458	ATCDWTNAGDYILANTCTERLKLFA	DRB3_0202;DRB5_0101;DRB3_0201;DRB1_1402;DRB1_0803;DRB1_0405;DRB1_1406;DQB1-0202_DQA1-0201;DRB1_0801	0.676368703	0.667590003	0.22094663
orf1ab polyprotein	5433	5457	IATCDWTNAGDYILANTCTERLKLF	DRB3_0202;DRB5_0101;DRB3_0201;DRB1_1402;DRB1_0803;DRB1_0405;DRB1_1406;DQB1-0202_DQA1-0201;DRB1_0801	0.676368703	0.667590003	0.22094663
orf1ab polyprotein	2355	2379	AVHFISNSWLMWLIINLVQMAPISA	DPB1-0401_DPA1-0103;DRB3_0201;DRB1_0302;DRB3_0301	0.711396507	0.705496098	0.080319
orf1a polyprotein	2355	2379	AVHFISNSWLMWLIINLVQMAPISA	DPB1-0401_DPA1-0103;DRB3_0201;DRB1_0302;DRB3_0301	0.711396507	0.705496098	0.080319
ORF9b protein	16	40	DPQIQLAVTRMENAVGRDQNNVGPK	DQB1-0602_DQA1-0102;DPB1-0402_DPA1-0103;DRB1_0901;DRB1_0404;DQB1-0302_DQA1-0301	0.590682162	0.584502936	0.453511243
ORF6 protein	1	25	MFHLVDFQVTIAEILLIIMRTFKVS	DPB1-0501_DPA1-0202;DRB1_0701;DPB1-0402_DPA1-0103	0.415894788	0.435605564	0.748775965
orf1a polyprotein	2627	2651	DNVLSTFISAARQGFVDSDVETKDV	DQB1-0602_DQA1-0102;DQB1-0502_DQA1-0102;DQB1-0303_DQA1-0201;DRB1_0901;DRB1_1101;DQB1-0501_DQA1-0101;DRB1_1402	0.584915312	0.571146525	0.479574191
orf1ab polyprotein	2627	2651	DNVLSTFISAARQGFVDSDVETKDV	DQB1-0602_DQA1-0102;DQB1-0502_DQA1-0102;DQB1-0303_DQA1-0201;DRB1_0901;DRB1_1101;DQB1-0501_DQA1-0101;DRB1_1402	0.584915312	0.571146525	0.479574191
orf1a polyprotein	2403	2427	GCNSSTCMMCYKRNRATRVECTTIV	DRB3_0202;DRB1_1302;DRB1_0701;DRB3_0301;DRB1_0101	0.629886642	0.662556875	0.27006899
orf1ab polyprotein	2403	2427	GCNSSTCMMCYKRNRATRVECTTIV	DRB3_0202;DRB1_1302;DRB1_0701;DRB3_0301;DRB1_0101	0.629886642	0.662556875	0.27006899
membrane glycoprotein	2	26	ADSNGTITVEELKKLLEQWNLVIGF	DRB1_1102;DRB1_1301;DQB1-0201_DQA1-0201;DRB1_1101;DRB1_0803;DPB1-0402_DPA1-0103;DRB1_0804;DRB1_1104;DRB1_1406;DQB1-0202_DQA1-0201;DRB1_0801	0.591910081	0.587702324	0.431892511
orf1ab polyprotein	5618	5642	GLALYYPSARIVYTACSHAAVDALC	DRB1_1503;DQB1-0303_DQA1-0201;DQB1-0602_DQA1-0102;DQB1-0302_DQA1-0301;DRB1_0403;DRB1_0404;DQB1-0601_DQA1-0103;DRB1_0102;DRB1_0402;DRB1_1104;DPB1-0601_DPA1-0103	0.613664955	0.598369988	0.388756328
orf1ab polyprotein	5450	5474	CTERLKLFAAETLKATEETFKLSYG	DRB1_0404;DRB1_0403;DRB1_0407;DQB1-0501_DQA1-0101;DRB1_0406;DPB1-0402_DPA1-0103;DRB1_0402;DRB1_1501	0.584153077	0.60623089	0.414778792
orf1ab polyprotein	5449	5473	TCTERLKLFAAETLKATEETFKLSY	DRB1_0404;DRB1_0403;DRB1_0407;DQB1-0501_DQA1-0101;DRB1_0406;DPB1-0402_DPA1-0103;DRB1_0402;DRB1_1501	0.584153077	0.60623089	0.414778792
surface glycoprotein	30	54	NSFTRGVYYPDKVFRSSVLHSTQDL	DPB1-0201_DPA1-0103;DQB1-0303_DQA1-0201;DPB1-0402_DPA1-0103;DQB1-0301_DQA1-0505	0.582247963	0.582247963	0.455356
orf1ab polyprotein	2869	2893	LPGTILRTTNGDFLHFLPRVFSAVG	DQB1-0201_DQA1-0501;DQB1-0401_DQA1-0301;DRB1_1102;DRB1_0403;DRB1_1101;DRB1_1401;DRB1_0804;DRB1_1404;DRB3_0301;DRB1_1406;DQB1-0202_DQA1-0201;DRB1_0801	0.608610469	0.59280197	0.402697066
orf1a polyprotein	2869	2893	LPGTILRTTNGDFLHFLPRVFSAVG	DQB1-0201_DQA1-0501;DQB1-0401_DQA1-0301;DRB1_1102;DRB1_0403;DRB1_1101;DRB1_1401;DRB1_0804;DRB1_1404;DRB3_0301;DRB1_1406;DQB1-0202_DQA1-0201;DRB1_0801	0.608610469	0.59280197	0.402697066
orf1ab polyprotein	6062	6086	SAKPPPGDQFKHLIPLMYKGLPWNV	DRB5_0102;DRB1_1101;DRB1_1202;DRB1_1406;DRB5_0101;DRB1_1201;DRB1_1402;DRB1_0803;DRB1_0101;DRB1_1001;DRB1_0802;DRB1_0801	0.577095042	0.5645492	0.488875095
orf1ab polyprotein	6060	6084	RVSAKPPPGDQFKHLIPLMYKGLPW	DRB5_0102;DRB1_1101;DRB1_1202;DRB1_1406;DRB5_0101;DRB1_1201;DRB1_1402;DRB1_0803;DRB1_0101;DRB1_1001;DRB1_0802;DRB1_0801	0.577095042	0.5645492	0.488875095
orf1ab polyprotein	6061	6085	VSAKPPPGDQFKHLIPLMYKGLPWN	DRB5_0102;DRB1_1101;DRB1_1202;DRB1_1406;DRB5_0101;DRB1_1201;DRB1_1402;DRB1_0803;DRB1_0101;DRB1_1001;DRB1_0802;DRB1_0801	0.577095042	0.5645492	0.488875095
orf1ab polyprotein	6063	6087	AKPPPGDQFKHLIPLMYKGLPWNVV	DRB5_0102;DRB1_1101;DRB1_1202;DRB1_1406;DRB5_0101;DRB1_1201;DRB1_1402;DRB1_0803;DRB1_0101;DRB1_1001;DRB1_0802;DRB1_0801	0.577095042	0.5645492	0.488875095
orf1ab polyprotein	2147	2171	NKVVSTTTNIVTRCLNRVCTNYMPY	DPB1-0202_DPA1-0103;DPB1-0101_DPA1-0103;DRB1_0403;DPB1-0501_DPA1-0201;DRB1_0406;DPB1-0402_DPA1-0103;DPB1-0901_DPA1-0201;DPB1-0201_DPA1-0103	0.442214606	0.435895076	0.703803519
orf1a polyprotein	2147	2171	NKVVSTTTNIVTRCLNRVCTNYMPY	DPB1-0202_DPA1-0103;DPB1-0101_DPA1-0103;DRB1_0403;DPB1-0501_DPA1-0201;DRB1_0406;DPB1-0402_DPA1-0103;DPB1-0901_DPA1-0201;DPB1-0201_DPA1-0103	0.442214606	0.435895076	0.703803519
orf1ab polyprotein	6718	6742	EDFIPMDSTVKNYFITDAQTGSSKC	DRB1_1602;DQB1-0502_DQA1-0102;DPB1-0501_DPA1-0202;DRB5_0102;DRB5_0101;DRB1_1402;DRB1_0101	0.461414174	0.474780716	0.707174745
orf1ab polyprotein	6717	6741	LEDFIPMDSTVKNYFITDAQTGSSK	DRB1_1602;DQB1-0502_DQA1-0102;DPB1-0501_DPA1-0202;DRB5_0102;DRB5_0101;DRB1_1402;DRB1_0101	0.461414174	0.474780716	0.707174745
orf1ab polyprotein	4753	4777	LHSSRLSFKELLVYAADPAMHAASG	DRB1_1503;DPB1-0101_DPA1-0201;DRB1_1502;DPB1-0101_DPA1-0103;DRB1_0404;DRB1_0403;DRB5_0202;DRB1_1501;DRB3_0101	0.608349727	0.617367495	0.366686444
orf1ab polyprotein	4754	4778	HSSRLSFKELLVYAADPAMHAASGN	DRB1_1503;DPB1-0101_DPA1-0201;DRB1_1502;DPB1-0101_DPA1-0103;DRB1_0404;DRB1_0403;DRB5_0202;DRB1_1501;DRB3_0101	0.608349727	0.617367495	0.366686444
orf1a polyprotein	3752	3776	MFLARGIVFMCVEYCPIFFITGNTL	DPB1-0101_DPA1-0103;DPB1-0401_DPA1-0103;DRB1_0404	0.699748675	0.701346946	0.096889902
orf1ab polyprotein	3752	3776	MFLARGIVFMCVEYCPIFFITGNTL	DPB1-0101_DPA1-0103;DPB1-0401_DPA1-0103;DRB1_0404	0.699748675	0.701346946	0.096889902
orf1a polyprotein	1835	1859	HYKHITSKETLYCIDGALLTKSSEY	DRB1_1602;DRB3_0202;DRB1_1303;DRB1_1405;DRB1_0102;DRB1_0804;DRB1_0402;DRB1_1404;DRB1_0101;DRB3_0101	0.677658948	0.674750245	0.170206535
orf1ab polyprotein	1835	1859	HYKHITSKETLYCIDGALLTKSSEY	DRB1_1602;DRB3_0202;DRB1_1303;DRB1_1405;DRB1_0102;DRB1_0804;DRB1_0402;DRB1_1404;DRB1_0101;DRB3_0101	0.677658948	0.674750245	0.170206535
orf1ab polyprotein	4280	4304	YKDYLASGGQPITNCVKMLCTHTGT	DRB1_1102;DPB1-0202_DPA1-0103;DRB1_0901;DRB1_1405;DRB1_0406;DRB1_1401;DRB1_0701;DRB1_0101;DQB1-0301_DQA1-0505;DRB1_1406	0.558553646	0.576435306	0.476243836
orf1a polyprotein	4280	4304	YKDYLASGGQPITNCVKMLCTHTGT	DRB1_1102;DPB1-0202_DPA1-0103;DRB1_0901;DRB1_1405;DRB1_0406;DRB1_1401;DRB1_0701;DRB1_0101;DQB1-0301_DQA1-0505;DRB1_1406	0.558553646	0.576435306	0.476243836
surface glycoprotein	85	109	PFNDGVYFASTEKSNIIRGWIFGTT	DQB1-0201_DQA1-0501;DRB1_0403;DRB1_0404;DRB1_1405;DRB1_1401;DQB1-0301_DQA1-0505;DQB1-0202_DQA1-0201	0.649498131	0.649397174	0.266702904
surface glycoprotein	87	111	NDGVYFASTEKSNIIRGWIFGTTLD	DQB1-0201_DQA1-0501;DRB1_0403;DRB1_0404;DRB1_1405;DRB1_1401;DQB1-0301_DQA1-0505;DQB1-0202_DQA1-0201	0.649498131	0.649397174	0.266702904
surface glycoprotein	86	110	FNDGVYFASTEKSNIIRGWIFGTTL	DQB1-0201_DQA1-0501;DRB1_0403;DRB1_0404;DRB1_1405;DRB1_1401;DQB1-0301_DQA1-0505;DQB1-0202_DQA1-0201	0.649498131	0.649397174	0.266702904
envelope protein	47	71	VNVSLVKPSFYVYSRVKNLNSSRVP	DRB1_0901;DRB1_0407;DRB1_1101;DRB1_1302;DRB1_0701;DQB1-0301_DQA1-0505	0.570962558	0.562807313	0.470918336
envelope protein	46	70	IVNVSLVKPSFYVYSRVKNLNSSRV	DRB1_0901;DRB1_0407;DRB1_1101;DRB1_1302;DRB1_0701;DQB1-0301_DQA1-0505	0.570962558	0.562807313	0.470918336
orf1a polyprotein	2170	2194	PYFFTLLLQLCTFTRSTNSRIKASM	DRB1_1601;DRB1_0901;DRB5_0102;DRB5_0101;DRB1_0701;DRB1_0101	0.587726458	0.618796705	0.378315059
orf1ab polyprotein	2170	2194	PYFFTLLLQLCTFTRSTNSRIKASM	DRB1_1601;DRB1_0901;DRB5_0102;DRB5_0101;DRB1_0701;DRB1_0101	0.587726458	0.618796705	0.378315059
orf1ab polyprotein	2171	2195	YFFTLLLQLCTFTRSTNSRIKASMP	DRB1_1601;DRB1_0901;DRB5_0102;DRB5_0101;DRB1_0701;DRB1_0101	0.587726458	0.618796705	0.378315059
orf1a polyprotein	2171	2195	YFFTLLLQLCTFTRSTNSRIKASMP	DRB1_1601;DRB1_0901;DRB5_0102;DRB5_0101;DRB1_0701;DRB1_0101	0.587726458	0.618796705	0.378315059
orf1a polyprotein	651	675	FISTCACEIVGGQIVTCAKEIKESV	DPB1-1001_DPA1-0201;DRB1_1301;DQB1-0302_DQA1-0301;DQB1-0301_DQA1-0303;DPB1-1701_DPA1-0201;DRB1_0406;DRB1_1405;DRB1_0302;DPB1-1101_DPA1-0201;DPB1-0901_DPA1-0201;DQB1-0301_DQA1-0505;DRB1_1406	0.603759459	0.594800603	0.400772057
orf1a polyprotein	650	674	KFISTCACEIVGGQIVTCAKEIKES	DPB1-1001_DPA1-0201;DRB1_1301;DQB1-0302_DQA1-0301;DQB1-0301_DQA1-0303;DPB1-1701_DPA1-0201;DRB1_0406;DRB1_1405;DRB1_0302;DPB1-1101_DPA1-0201;DPB1-0901_DPA1-0201;DQB1-0301_DQA1-0505;DRB1_1406	0.603759459	0.594800603	0.400772057
orf1ab polyprotein	650	674	KFISTCACEIVGGQIVTCAKEIKES	DPB1-1001_DPA1-0201;DRB1_1301;DQB1-0302_DQA1-0301;DQB1-0301_DQA1-0303;DPB1-1701_DPA1-0201;DRB1_0406;DRB1_1405;DRB1_0302;DPB1-1101_DPA1-0201;DPB1-0901_DPA1-0201;DQB1-0301_DQA1-0505;DRB1_1406	0.603759459	0.594800603	0.400772057
orf1ab polyprotein	651	675	FISTCACEIVGGQIVTCAKEIKESV	DPB1-1001_DPA1-0201;DRB1_1301;DQB1-0302_DQA1-0301;DQB1-0301_DQA1-0303;DPB1-1701_DPA1-0201;DRB1_0406;DRB1_1405;DRB1_0302;DPB1-1101_DPA1-0201;DPB1-0901_DPA1-0201;DQB1-0301_DQA1-0505;DRB1_1406	0.603759459	0.594800603	0.400772057
orf1a polyprotein	1226	1250	KQDDKKIKACVEEVTTTLEETKFLT	DPB1-1001_DPA1-0201;DRB1_1503;DQB1-0602_DQA1-0102;DPB1-1301_DPA1-0201;DQB1-0302_DQA1-0301;DQB1-0604_DQA1-0102;DRB1_0411;DQB1-0202_DQA1-0201	0.665968698	0.650897791	0.220719714
orf1ab polyprotein	1226	1250	KQDDKKIKACVEEVTTTLEETKFLT	DPB1-1001_DPA1-0201;DRB1_1503;DQB1-0602_DQA1-0102;DPB1-1301_DPA1-0201;DQB1-0302_DQA1-0301;DQB1-0604_DQA1-0102;DRB1_0411;DQB1-0202_DQA1-0201	0.665968698	0.650897791	0.220719714
orf1a polyprotein	1562	1586	LREVRTIKVFTTVDNINLHTQVVDM	DRB1_1602;DQB1-0303_DQA1-0201;DRB1_0404;DRB1_1601;DRB5_0202;DRB1_0402;DRB4_0103;DQB1-0202_DQA1-0201	0.688493242	0.687423849	0.06398245
orf1ab polyprotein	1562	1586	LREVRTIKVFTTVDNINLHTQVVDM	DRB1_1602;DQB1-0303_DQA1-0201;DRB1_0404;DRB1_1601;DRB5_0202;DRB1_0402;DRB4_0103;DQB1-0202_DQA1-0201	0.688493242	0.687423849	0.06398245
orf1a polyprotein	2174	2198	TLLLQLCTFTRSTNSRIKASMPTTI	DQB1-0602_DQA1-0102;DRB1_1601;DRB1_0901;DRB5_0102;DRB1_0701;DRB1_0101	0.566501326	0.599171167	0.422270671
orf1ab polyprotein	2174	2198	TLLLQLCTFTRSTNSRIKASMPTTI	DQB1-0602_DQA1-0102;DRB1_1601;DRB1_0901;DRB5_0102;DRB1_0701;DRB1_0101	0.566501326	0.599171167	0.422270671
orf1ab polyprotein	5196	5220	DLTKGPHEFCSQHTMLVKQGDDYVY	DRB1_1602;DQB1-0602_DQA1-0102;DQB1-0303_DQA1-0201;DRB1_0401;DRB1_1601;DRB1_1402;DRB1_0101;DQB1-0202_DQA1-0201	0.645243744	0.679599959	0.17283558
orf1ab polyprotein	5195	5219	TDLTKGPHEFCSQHTMLVKQGDDYV	DRB1_1602;DQB1-0602_DQA1-0102;DQB1-0303_DQA1-0201;DRB1_0401;DRB1_1601;DRB1_1402;DRB1_0101;DQB1-0202_DQA1-0201	0.645243744	0.679599959	0.17283558
orf1ab polyprotein	5198	5222	TKGPHEFCSQHTMLVKQGDDYVYLP	DRB1_1602;DQB1-0602_DQA1-0102;DQB1-0303_DQA1-0201;DRB1_0401;DRB1_1601;DRB1_1402;DRB1_0101;DQB1-0202_DQA1-0201	0.645243744	0.679599959	0.17283558
orf1ab polyprotein	5194	5218	ETDLTKGPHEFCSQHTMLVKQGDDY	DRB1_1602;DQB1-0602_DQA1-0102;DQB1-0303_DQA1-0201;DRB1_0401;DRB1_1601;DRB1_1402;DRB1_0101;DQB1-0202_DQA1-0201	0.645243744	0.679599959	0.17283558
orf1ab polyprotein	5197	5221	LTKGPHEFCSQHTMLVKQGDDYVYL	DRB1_1602;DQB1-0602_DQA1-0102;DQB1-0303_DQA1-0201;DRB1_0401;DRB1_1601;DRB1_1402;DRB1_0101;DQB1-0202_DQA1-0201	0.645243744	0.679599959	0.17283558
orf1ab polyprotein	5553	5577	SHTVMPLSAPTLVPQEHYVRITGLY	DQB1-0302_DQA1-0301;DRB4_0103;DRB1_0101;DPB1-0501_DPA1-0201	0.633076987	0.650482367	0.264768154
orf1a polyprotein	2860	2884	REVGFVVPGLPGTILRTTNGDFLHF	DRB1_0403;DRB1_1404;DRB3_0301;DPB1-0201_DPA1-0103;DQB1-0301_DQA1-0505;DQB1-0202_DQA1-0201	0.59485663	0.590581062	0.416803366
orf1a polyprotein	2859	2883	TREVGFVVPGLPGTILRTTNGDFLH	DRB1_0403;DRB1_1404;DRB3_0301;DPB1-0201_DPA1-0103;DQB1-0301_DQA1-0505;DQB1-0202_DQA1-0201	0.59485663	0.590581062	0.416803366
orf1ab polyprotein	2859	2883	TREVGFVVPGLPGTILRTTNGDFLH	DRB1_0403;DRB1_1404;DRB3_0301;DPB1-0201_DPA1-0103;DQB1-0301_DQA1-0505;DQB1-0202_DQA1-0201	0.59485663	0.590581062	0.416803366
orf1ab polyprotein	2860	2884	REVGFVVPGLPGTILRTTNGDFLHF	DRB1_0403;DRB1_1404;DRB3_0301;DPB1-0201_DPA1-0103;DQB1-0301_DQA1-0505;DQB1-0202_DQA1-0201	0.59485663	0.590581062	0.416803366
ORF9b protein	35	59	NNVGPKVYPIILRLGSPLSLNMARK	DRB1_0102;DQB1-0602_DQA1-0102;DRB1_0401;DPB1-1401_DPA1-0201;DPB1-0301_DPA1-0103;DPB1-0901_DPA1-0201;DPB1-1001_DPA1-0201;DRB1_1101	0.595564978	0.616298426	0.350305546
surface glycoprotein	314	338	QTSNFRVQPTESIVRFPNITNLCPF	DRB1_1502;DRB1_0401;DRB1_0302;DRB1_0405;DRB1_0402;DRB1_1501;DRB1_0101;DRB1_1001	0.508736204	0.58588201	0.494933938
orf1ab polyprotein	4633	4657	LMPILTLTRALTAESHVDTDLTKPY	DRB1_0401;DRB1_1101;DRB1_0701;DRB1_0804;DRB1_1104;DRB1_0802;DQB1-0301_DQA1-0505	0.608592627	0.636899031	0.297353702
orf1ab polyprotein	4628	4652	SYYSLLMPILTLTRALTAESHVDTD	DRB1_0401;DRB1_1101;DRB1_0701;DRB1_0804;DRB1_1104;DRB1_0802;DQB1-0301_DQA1-0505	0.608592627	0.636899031	0.297353702
orf1ab polyprotein	4630	4654	YSLLMPILTLTRALTAESHVDTDLT	DRB1_0401;DRB1_1101;DRB1_0701;DRB1_0804;DRB1_1104;DRB1_0802;DQB1-0301_DQA1-0505	0.608592627	0.636899031	0.297353702
orf1ab polyprotein	4629	4653	YYSLLMPILTLTRALTAESHVDTDL	DRB1_0401;DRB1_1101;DRB1_0701;DRB1_0804;DRB1_1104;DRB1_0802;DQB1-0301_DQA1-0505	0.608592627	0.636899031	0.297353702
orf1ab polyprotein	4632	4656	LLMPILTLTRALTAESHVDTDLTKP	DRB1_0401;DRB1_1101;DRB1_0701;DRB1_0804;DRB1_1104;DRB1_0802;DQB1-0301_DQA1-0505	0.608592627	0.636899031	0.297353702
orf1ab polyprotein	4631	4655	SLLMPILTLTRALTAESHVDTDLTK	DRB1_0401;DRB1_1101;DRB1_0701;DRB1_0804;DRB1_1104;DRB1_0802;DQB1-0301_DQA1-0505	0.608592627	0.636899031	0.297353702
orf1ab polyprotein	6433	6457	LWVYKQFDTYNLWNTFTRLQSLENV	DQB1-0602_DQA1-0102;DRB5_0102;DRB1_1101;DRB1_1302;DRB5_0101;DRB1_0804;DRB1_1104;DRB1_0802	0.641601224	0.624793833	0.258767853
surface glycoprotein	1069	1093	PAQEKNFTTAPAICHDGKAHFPREG	DPB1-1001_DPA1-0201;DQB1-0201_DQA1-0501;DPB1-1401_DPA1-0201;DRB1_0301;DRB1_0901;DRB1_1303;DPB1-1701_DPA1-0201;DRB1_1401;DPB1-0901_DPA1-0201;DRB1_1406	0.525096307	0.53285478	0.53644066
orf1a polyprotein	2714	2738	NVKDFMSLSEQLRKQIRSAAKKNNL	DQB1-0201_DQA1-0501;DQB1-0201_DQA1-0201;DRB5_0102;DRB5_0101;DRB1_1402;DPB1-1101_DPA1-0201;DRB1_1406;DQB1-0202_DQA1-0201	0.643930485	0.637475087	0.232157354
orf1a polyprotein	2712	2736	IWNVKDFMSLSEQLRKQIRSAAKKN	DQB1-0201_DQA1-0501;DQB1-0201_DQA1-0201;DRB5_0102;DRB5_0101;DRB1_1402;DPB1-1101_DPA1-0201;DRB1_1406;DQB1-0202_DQA1-0201	0.643930485	0.637475087	0.232157354
orf1ab polyprotein	2712	2736	IWNVKDFMSLSEQLRKQIRSAAKKN	DQB1-0201_DQA1-0501;DQB1-0201_DQA1-0201;DRB5_0102;DRB5_0101;DRB1_1402;DPB1-1101_DPA1-0201;DRB1_1406;DQB1-0202_DQA1-0201	0.643930485	0.637475087	0.232157354
orf1a polyprotein	2713	2737	WNVKDFMSLSEQLRKQIRSAAKKNN	DQB1-0201_DQA1-0501;DQB1-0201_DQA1-0201;DRB5_0102;DRB5_0101;DRB1_1402;DPB1-1101_DPA1-0201;DRB1_1406;DQB1-0202_DQA1-0201	0.643930485	0.637475087	0.232157354
orf1ab polyprotein	2713	2737	WNVKDFMSLSEQLRKQIRSAAKKNN	DQB1-0201_DQA1-0501;DQB1-0201_DQA1-0201;DRB5_0102;DRB5_0101;DRB1_1402;DPB1-1101_DPA1-0201;DRB1_1406;DQB1-0202_DQA1-0201	0.643930485	0.637475087	0.232157354
orf1ab polyprotein	2714	2738	NVKDFMSLSEQLRKQIRSAAKKNNL	DQB1-0201_DQA1-0501;DQB1-0201_DQA1-0201;DRB5_0102;DRB5_0101;DRB1_1402;DPB1-1101_DPA1-0201;DRB1_1406;DQB1-0202_DQA1-0201	0.643930485	0.637475087	0.232157354
orf1a polyprotein	263	287	FDTFNGECPNFVFPLNSIIKTIQPR	DPB1-0501_DPA1-0202;DRB5_0101;DQB1-0201_DQA1-0501	0.485174997	0.485174997	0.667560116
orf1ab polyprotein	263	287	FDTFNGECPNFVFPLNSIIKTIQPR	DPB1-0501_DPA1-0202;DRB5_0101;DQB1-0201_DQA1-0501	0.485174997	0.485174997	0.667560116
orf1ab polyprotein	1639	1663	DPSFLGRYMSALNHTKKWKYPQVNG	DPB1-1301_DPA1-0201;DRB1_0901;DPB1-0501_DPA1-0202;DRB5_0102;DRB5_0101;DPB1-1101_DPA1-0201;DRB1_1401	0.441243747	0.432665531	0.72123015
orf1a polyprotein	1639	1663	DPSFLGRYMSALNHTKKWKYPQVNG	DPB1-1301_DPA1-0201;DRB1_0901;DPB1-0501_DPA1-0202;DRB5_0102;DRB5_0101;DPB1-1101_DPA1-0201;DRB1_1401	0.441243747	0.432665531	0.72123015
orf1ab polyprotein	2514	2538	ERHSLSHFVNLDNLRANNTKGSLPI	DRB1_1602;DRB1_1102;DQB1-0502_DQA1-0102;DRB1_0401;DRB1_0404;DRB1_0403;DRB1_0407;DRB1_1101;DRB1_1601;DRB1_0102;DRB1_0405;DRB1_0101;DRB1_0802	0.551432933	0.555283923	0.487690743
orf1a polyprotein	2513	2537	YERHSLSHFVNLDNLRANNTKGSLP	DRB1_1602;DRB1_1102;DQB1-0502_DQA1-0102;DRB1_0401;DRB1_0404;DRB1_0403;DRB1_0407;DRB1_1101;DRB1_1601;DRB1_0102;DRB1_0405;DRB1_0101;DRB1_0802	0.551432933	0.555283923	0.487690743
orf1a polyprotein	2515	2539	RHSLSHFVNLDNLRANNTKGSLPIN	DRB1_1602;DRB1_1102;DQB1-0502_DQA1-0102;DRB1_0401;DRB1_0404;DRB1_0403;DRB1_0407;DRB1_1101;DRB1_1601;DRB1_0102;DRB1_0405;DRB1_0101;DRB1_0802	0.551432933	0.555283923	0.487690743
orf1ab polyprotein	2515	2539	RHSLSHFVNLDNLRANNTKGSLPIN	DRB1_1602;DRB1_1102;DQB1-0502_DQA1-0102;DRB1_0401;DRB1_0404;DRB1_0403;DRB1_0407;DRB1_1101;DRB1_1601;DRB1_0102;DRB1_0405;DRB1_0101;DRB1_0802	0.551432933	0.555283923	0.487690743
orf1ab polyprotein	2513	2537	YERHSLSHFVNLDNLRANNTKGSLP	DRB1_1602;DRB1_1102;DQB1-0502_DQA1-0102;DRB1_0401;DRB1_0404;DRB1_0403;DRB1_0407;DRB1_1101;DRB1_1601;DRB1_0102;DRB1_0405;DRB1_0101;DRB1_0802	0.551432933	0.555283923	0.487690743
orf1a polyprotein	2514	2538	ERHSLSHFVNLDNLRANNTKGSLPI	DRB1_1602;DRB1_1102;DQB1-0502_DQA1-0102;DRB1_0401;DRB1_0404;DRB1_0403;DRB1_0407;DRB1_1101;DRB1_1601;DRB1_0102;DRB1_0405;DRB1_0101;DRB1_0802	0.551432933	0.555283923	0.487690743
orf1ab polyprotein	3688	3712	AVVLLILMTARTVYDDGARRVWTLM	DQB1-0401_DQA1-0301;DQB1-0302_DQA1-0301;DQB1-0201_DQA1-0201;DRB1_0411;DRB1_0102;DRB3_0301;DRB1_0101;DQB1-0603_DQA1-0103;DQB1-0202_DQA1-0201	0.599601987	0.611354411	0.34403353
orf1ab polyprotein	3687	3711	SAVVLLILMTARTVYDDGARRVWTL	DQB1-0401_DQA1-0301;DQB1-0302_DQA1-0301;DQB1-0201_DQA1-0201;DRB1_0411;DRB1_0102;DRB3_0301;DRB1_0101;DQB1-0603_DQA1-0103;DQB1-0202_DQA1-0201	0.599601987	0.611354411	0.34403353
orf1ab polyprotein	3686	3710	ASAVVLLILMTARTVYDDGARRVWT	DQB1-0401_DQA1-0301;DQB1-0302_DQA1-0301;DQB1-0201_DQA1-0201;DRB1_0411;DRB1_0102;DRB3_0301;DRB1_0101;DQB1-0603_DQA1-0103;DQB1-0202_DQA1-0201	0.599601987	0.611354411	0.34403353
orf1a polyprotein	3687	3711	SAVVLLILMTARTVYDDGARRVWTL	DQB1-0401_DQA1-0301;DQB1-0302_DQA1-0301;DQB1-0201_DQA1-0201;DRB1_0411;DRB1_0102;DRB3_0301;DRB1_0101;DQB1-0603_DQA1-0103;DQB1-0202_DQA1-0201	0.599601987	0.611354411	0.34403353
orf1a polyprotein	3686	3710	ASAVVLLILMTARTVYDDGARRVWT	DQB1-0401_DQA1-0301;DQB1-0302_DQA1-0301;DQB1-0201_DQA1-0201;DRB1_0411;DRB1_0102;DRB3_0301;DRB1_0101;DQB1-0603_DQA1-0103;DQB1-0202_DQA1-0201	0.599601987	0.611354411	0.34403353
orf1a polyprotein	3688	3712	AVVLLILMTARTVYDDGARRVWTLM	DQB1-0401_DQA1-0301;DQB1-0302_DQA1-0301;DQB1-0201_DQA1-0201;DRB1_0411;DRB1_0102;DRB3_0301;DRB1_0101;DQB1-0603_DQA1-0103;DQB1-0202_DQA1-0201	0.599601987	0.611354411	0.34403353
orf1a polyprotein	1331	1355	GQGLNGYTVEEAKTVLKKCKSAFYI	DQB1-0201_DQA1-0501;DQB1-0401_DQA1-0301;DRB5_0102;DRB1_1202;DQB1-0402_DQA1-0401;DRB5_0101;DRB1_1404;DRB1_0101	0.588632782	0.602282128	0.380966909
orf1ab polyprotein	1331	1355	GQGLNGYTVEEAKTVLKKCKSAFYI	DQB1-0201_DQA1-0501;DQB1-0401_DQA1-0301;DRB5_0102;DRB1_1202;DQB1-0402_DQA1-0401;DRB5_0101;DRB1_1404;DRB1_0101	0.588632782	0.602282128	0.380966909
surface glycoprotein	959	983	LNTLVKQLSSNFGAISSVLNDILSR	DQB1-0201_DQA1-0501;DRB1_0404;DRB1_1501;DRB1_1001;DQB1-0202_DQA1-0201	0.599875643	0.629646333	0.320548634
surface glycoprotein	958	982	ALNTLVKQLSSNFGAISSVLNDILS	DQB1-0201_DQA1-0501;DRB1_0404;DRB1_1501;DRB1_1001;DQB1-0202_DQA1-0201	0.599875643	0.629646333	0.320548634
orf1ab polyprotein	4605	4629	NGNWYDFGDFIQTTPGSGVPVVDSY	DRB1_0407;DRB1_1101;DRB1_0701;DPB1-0402_DPA1-0103;DRB1_0804;DRB1_1404;DRB3_0301;DRB1_0802;DRB1_1001	0.577730703	0.552900079	0.445203989
orf1ab polyprotein	4603	4627	DLNGNWYDFGDFIQTTPGSGVPVVD	DRB1_0407;DRB1_1101;DRB1_0701;DPB1-0402_DPA1-0103;DRB1_0804;DRB1_1404;DRB3_0301;DRB1_0802;DRB1_1001	0.577730703	0.552900079	0.445203989
orf1ab polyprotein	4604	4628	LNGNWYDFGDFIQTTPGSGVPVVDS	DRB1_0407;DRB1_1101;DRB1_0701;DPB1-0402_DPA1-0103;DRB1_0804;DRB1_1404;DRB3_0301;DRB1_0802;DRB1_1001	0.577730703	0.552900079	0.445203989
orf1ab polyprotein	2351	2375	FSYFAVHFISNSWLMWLIINLVQMA	DPB1-0401_DPA1-0103;DRB1_0406;DRB1_1404	0.680758582	0.678764112	0.154186858
orf1a polyprotein	2347	2371	MQLFFSYFAVHFISNSWLMWLIINL	DPB1-0401_DPA1-0103;DRB1_0406;DRB1_1404	0.680758582	0.678764112	0.154186858
orf1ab polyprotein	2348	2372	QLFFSYFAVHFISNSWLMWLIINLV	DPB1-0401_DPA1-0103;DRB1_0406;DRB1_1404	0.680758582	0.678764112	0.154186858
orf1ab polyprotein	2349	2373	LFFSYFAVHFISNSWLMWLIINLVQ	DPB1-0401_DPA1-0103;DRB1_0406;DRB1_1404	0.680758582	0.678764112	0.154186858
orf1ab polyprotein	2350	2374	FFSYFAVHFISNSWLMWLIINLVQM	DPB1-0401_DPA1-0103;DRB1_0406;DRB1_1404	0.680758582	0.678764112	0.154186858
orf1a polyprotein	2351	2375	FSYFAVHFISNSWLMWLIINLVQMA	DPB1-0401_DPA1-0103;DRB1_0406;DRB1_1404	0.680758582	0.678764112	0.154186858
orf1a polyprotein	2350	2374	FFSYFAVHFISNSWLMWLIINLVQM	DPB1-0401_DPA1-0103;DRB1_0406;DRB1_1404	0.680758582	0.678764112	0.154186858
orf1a polyprotein	2349	2373	LFFSYFAVHFISNSWLMWLIINLVQ	DPB1-0401_DPA1-0103;DRB1_0406;DRB1_1404	0.680758582	0.678764112	0.154186858
orf1ab polyprotein	2347	2371	MQLFFSYFAVHFISNSWLMWLIINL	DPB1-0401_DPA1-0103;DRB1_0406;DRB1_1404	0.680758582	0.678764112	0.154186858
orf1a polyprotein	2348	2372	QLFFSYFAVHFISNSWLMWLIINLV	DPB1-0401_DPA1-0103;DRB1_0406;DRB1_1404	0.680758582	0.678764112	0.154186858
surface glycoprotein	1174	1198	ASVVNIQKEIDRLNEVAKNLNESLI	DPB1-1001_DPA1-0201;DPB1-1401_DPA1-0201;DQB1-0502_DQA1-0102;DPB1-0501_DPA1-0202;DPB1-1701_DPA1-0201;DPB1-0301_DPA1-0103;DRB1_0803;DPB1-0901_DPA1-0201	0.325428373	0.320957013	0.804292
surface glycoprotein	1173	1197	NASVVNIQKEIDRLNEVAKNLNESL	DPB1-1001_DPA1-0201;DPB1-1401_DPA1-0201;DQB1-0502_DQA1-0102;DPB1-0501_DPA1-0202;DPB1-1701_DPA1-0201;DPB1-0301_DPA1-0103;DRB1_0803;DPB1-0901_DPA1-0201	0.325428373	0.320957013	0.804292
orf1ab polyprotein	6840	6864	MNVAKYTQLCQYLNTLTLAVPYNMR	DRB1_1503;DRB1_1502;DRB1_0701;DPB1-0901_DPA1-0201;DRB1_1501;DRB1_1001	0.484241113	0.514605345	0.582227024
orf1ab polyprotein	6841	6865	NVAKYTQLCQYLNTLTLAVPYNMRV	DRB1_1503;DRB1_1502;DRB1_0701;DPB1-0901_DPA1-0201;DRB1_1501;DRB1_1001	0.484241113	0.514605345	0.582227024
ORF9b protein	59	83	KTLNSLEDKAFQLTPIAVQMTKLAT	DPB1-0202_DPA1-0103;DPB1-0201_DPA1-0103;DRB4_0103;DRB1_0407	0.615965837	0.60939696	0.348975779
surface glycoprotein	966	990	LSSNFGAISSVLNDILSRLDKVEAE	DQB1-0201_DQA1-0501;DRB1_0302;DRB1_1501;DRB1_1104;DRB1_1001;DQB1-0202_DQA1-0201	0.601685022	0.625625931	0.316608114
nucleocapsid phosphoprotein	120	144	GLPYGANKDGIIWVATEGALNTPKD	DRB1_1503;DPB1-0101_DPA1-0201;DQB1-0602_DQA1-0102;DRB1_0401;DRB1_0403;DRB1_0404;DRB1_0407;DRB1_1001;DQB1-0202_DQA1-0201	0.641561758	0.638948044	0.223143136
orf1a polyprotein	1180	1204	KNLYDKLVSSFLEMKSEKQVEQKIA	DRB1_1503;DRB1_1602;DRB1_1502;DQB1-0502_DQA1-0102;DRB1_0401;DRB1_1601;DRB1_0407;DRB1_1101;DRB5_0102;DRB1_0405;DRB1_0101;DRB1_1001	0.508551324	0.512521591	0.558593927
orf1ab polyprotein	1182	1206	LYDKLVSSFLEMKSEKQVEQKIAEI	DRB1_1503;DRB1_1602;DRB1_1502;DQB1-0502_DQA1-0102;DRB1_0401;DRB1_1601;DRB1_0407;DRB1_1101;DRB5_0102;DRB1_0405;DRB1_0101;DRB1_1001	0.508551324	0.512521591	0.558593927
orf1a polyprotein	1185	1209	KLVSSFLEMKSEKQVEQKIAEIPKE	DRB1_1503;DRB1_1602;DRB1_1502;DQB1-0502_DQA1-0102;DRB1_0401;DRB1_1601;DRB1_0407;DRB1_1101;DRB5_0102;DRB1_0405;DRB1_0101;DRB1_1001	0.508551324	0.512521591	0.558593927
orf1ab polyprotein	1184	1208	DKLVSSFLEMKSEKQVEQKIAEIPK	DRB1_1503;DRB1_1602;DRB1_1502;DQB1-0502_DQA1-0102;DRB1_0401;DRB1_1601;DRB1_0407;DRB1_1101;DRB5_0102;DRB1_0405;DRB1_0101;DRB1_1001	0.508551324	0.512521591	0.558593927
orf1ab polyprotein	1185	1209	KLVSSFLEMKSEKQVEQKIAEIPKE	DRB1_1503;DRB1_1602;DRB1_1502;DQB1-0502_DQA1-0102;DRB1_0401;DRB1_1601;DRB1_0407;DRB1_1101;DRB5_0102;DRB1_0405;DRB1_0101;DRB1_1001	0.508551324	0.512521591	0.558593927
orf1ab polyprotein	1183	1207	YDKLVSSFLEMKSEKQVEQKIAEIP	DRB1_1503;DRB1_1602;DRB1_1502;DQB1-0502_DQA1-0102;DRB1_0401;DRB1_1601;DRB1_0407;DRB1_1101;DRB5_0102;DRB1_0405;DRB1_0101;DRB1_1001	0.508551324	0.512521591	0.558593927
orf1a polyprotein	1181	1205	NLYDKLVSSFLEMKSEKQVEQKIAE	DRB1_1503;DRB1_1602;DRB1_1502;DQB1-0502_DQA1-0102;DRB1_0401;DRB1_1601;DRB1_0407;DRB1_1101;DRB5_0102;DRB1_0405;DRB1_0101;DRB1_1001	0.508551324	0.512521591	0.558593927
orf1a polyprotein	1184	1208	DKLVSSFLEMKSEKQVEQKIAEIPK	DRB1_1503;DRB1_1602;DRB1_1502;DQB1-0502_DQA1-0102;DRB1_0401;DRB1_1601;DRB1_0407;DRB1_1101;DRB5_0102;DRB1_0405;DRB1_0101;DRB1_1001	0.508551324	0.512521591	0.558593927
orf1a polyprotein	1183	1207	YDKLVSSFLEMKSEKQVEQKIAEIP	DRB1_1503;DRB1_1602;DRB1_1502;DQB1-0502_DQA1-0102;DRB1_0401;DRB1_1601;DRB1_0407;DRB1_1101;DRB5_0102;DRB1_0405;DRB1_0101;DRB1_1001	0.508551324	0.512521591	0.558593927
orf1ab polyprotein	1180	1204	KNLYDKLVSSFLEMKSEKQVEQKIA	DRB1_1503;DRB1_1602;DRB1_1502;DQB1-0502_DQA1-0102;DRB1_0401;DRB1_1601;DRB1_0407;DRB1_1101;DRB5_0102;DRB1_0405;DRB1_0101;DRB1_1001	0.508551324	0.512521591	0.558593927
orf1a polyprotein	1179	1203	DKNLYDKLVSSFLEMKSEKQVEQKI	DRB1_1503;DRB1_1602;DRB1_1502;DQB1-0502_DQA1-0102;DRB1_0401;DRB1_1601;DRB1_0407;DRB1_1101;DRB5_0102;DRB1_0405;DRB1_0101;DRB1_1001	0.508551324	0.512521591	0.558593927
orf1ab polyprotein	1178	1202	FDKNLYDKLVSSFLEMKSEKQVEQK	DRB1_1503;DRB1_1602;DRB1_1502;DQB1-0502_DQA1-0102;DRB1_0401;DRB1_1601;DRB1_0407;DRB1_1101;DRB5_0102;DRB1_0405;DRB1_0101;DRB1_1001	0.508551324	0.512521591	0.558593927
orf1ab polyprotein	1181	1205	NLYDKLVSSFLEMKSEKQVEQKIAE	DRB1_1503;DRB1_1602;DRB1_1502;DQB1-0502_DQA1-0102;DRB1_0401;DRB1_1601;DRB1_0407;DRB1_1101;DRB5_0102;DRB1_0405;DRB1_0101;DRB1_1001	0.508551324	0.512521591	0.558593927
orf1a polyprotein	1178	1202	FDKNLYDKLVSSFLEMKSEKQVEQK	DRB1_1503;DRB1_1602;DRB1_1502;DQB1-0502_DQA1-0102;DRB1_0401;DRB1_1601;DRB1_0407;DRB1_1101;DRB5_0102;DRB1_0405;DRB1_0101;DRB1_1001	0.508551324	0.512521591	0.558593927
orf1a polyprotein	1182	1206	LYDKLVSSFLEMKSEKQVEQKIAEI	DRB1_1503;DRB1_1602;DRB1_1502;DQB1-0502_DQA1-0102;DRB1_0401;DRB1_1601;DRB1_0407;DRB1_1101;DRB5_0102;DRB1_0405;DRB1_0101;DRB1_1001	0.508551324	0.512521591	0.558593927
orf1ab polyprotein	1179	1203	DKNLYDKLVSSFLEMKSEKQVEQKI	DRB1_1503;DRB1_1602;DRB1_1502;DQB1-0502_DQA1-0102;DRB1_0401;DRB1_1601;DRB1_0407;DRB1_1101;DRB5_0102;DRB1_0405;DRB1_0101;DRB1_1001	0.508551324	0.512521591	0.558593927
orf1ab polyprotein	1836	1860	YKHITSKETLYCIDGALLTKSSEYK	DRB1_1602;DRB3_0202;DRB1_1303;DRB1_1405;DRB1_0102;DRB1_1404;DRB1_0101;DRB3_0101	0.663312023	0.666762949	0.163488548
orf1a polyprotein	1837	1861	KHITSKETLYCIDGALLTKSSEYKG	DRB1_1602;DRB3_0202;DRB1_1303;DRB1_1405;DRB1_0102;DRB1_1404;DRB1_0101;DRB3_0101	0.663312023	0.666762949	0.163488548
orf1a polyprotein	1836	1860	YKHITSKETLYCIDGALLTKSSEYK	DRB1_1602;DRB3_0202;DRB1_1303;DRB1_1405;DRB1_0102;DRB1_1404;DRB1_0101;DRB3_0101	0.663312023	0.666762949	0.163488548
orf1ab polyprotein	1839	1863	ITSKETLYCIDGALLTKSSEYKGPI	DRB1_1602;DRB3_0202;DRB1_1303;DRB1_1405;DRB1_0102;DRB1_1404;DRB1_0101;DRB3_0101	0.663312023	0.666762949	0.163488548
orf1ab polyprotein	1838	1862	HITSKETLYCIDGALLTKSSEYKGP	DRB1_1602;DRB3_0202;DRB1_1303;DRB1_1405;DRB1_0102;DRB1_1404;DRB1_0101;DRB3_0101	0.663312023	0.666762949	0.163488548
orf1ab polyprotein	1837	1861	KHITSKETLYCIDGALLTKSSEYKG	DRB1_1602;DRB3_0202;DRB1_1303;DRB1_1405;DRB1_0102;DRB1_1404;DRB1_0101;DRB3_0101	0.663312023	0.666762949	0.163488548
orf1a polyprotein	1838	1862	HITSKETLYCIDGALLTKSSEYKGP	DRB1_1602;DRB3_0202;DRB1_1303;DRB1_1405;DRB1_0102;DRB1_1404;DRB1_0101;DRB3_0101	0.663312023	0.666762949	0.163488548
orf1a polyprotein	1839	1863	ITSKETLYCIDGALLTKSSEYKGPI	DRB1_1602;DRB3_0202;DRB1_1303;DRB1_1405;DRB1_0102;DRB1_1404;DRB1_0101;DRB3_0101	0.663312023	0.666762949	0.163488548
orf1ab polyprotein	1333	1357	GLNGYTVEEAKTVLKKCKSAFYILP	DQB1-0201_DQA1-0501;DRB1_1202;DRB5_0101;DPB1-0901_DPA1-0201;DRB1_1404;DRB1_0101	0.553584942	0.568397191	0.464906646
orf1a polyprotein	1333	1357	GLNGYTVEEAKTVLKKCKSAFYILP	DQB1-0201_DQA1-0501;DRB1_1202;DRB5_0101;DPB1-0901_DPA1-0201;DRB1_1404;DRB1_0101	0.553584942	0.568397191	0.464906646
orf1a polyprotein	1900	1924	YKKDNSYFTEQPIDLVPNQPYPNAS	DRB1_1301;DRB1_0403;DRB1_1202;DRB4_0103;DRB1_0101	0.616386798	0.634251796	0.294047156
orf1a polyprotein	1899	1923	YYKKDNSYFTEQPIDLVPNQPYPNA	DRB1_1301;DRB1_0403;DRB1_1202;DRB4_0103;DRB1_0101	0.616386798	0.634251796	0.294047156
orf1a polyprotein	1898	1922	NYYKKDNSYFTEQPIDLVPNQPYPN	DRB1_1301;DRB1_0403;DRB1_1202;DRB4_0103;DRB1_0101	0.616386798	0.634251796	0.294047156
orf1a polyprotein	1901	1925	KKDNSYFTEQPIDLVPNQPYPNASF	DRB1_1301;DRB1_0403;DRB1_1202;DRB4_0103;DRB1_0101	0.616386798	0.634251796	0.294047156
orf1ab polyprotein	1899	1923	YYKKDNSYFTEQPIDLVPNQPYPNA	DRB1_1301;DRB1_0403;DRB1_1202;DRB4_0103;DRB1_0101	0.616386798	0.634251796	0.294047156
orf1ab polyprotein	1900	1924	YKKDNSYFTEQPIDLVPNQPYPNAS	DRB1_1301;DRB1_0403;DRB1_1202;DRB4_0103;DRB1_0101	0.616386798	0.634251796	0.294047156
orf1ab polyprotein	1898	1922	NYYKKDNSYFTEQPIDLVPNQPYPN	DRB1_1301;DRB1_0403;DRB1_1202;DRB4_0103;DRB1_0101	0.616386798	0.634251796	0.294047156
orf1ab polyprotein	1901	1925	KKDNSYFTEQPIDLVPNQPYPNASF	DRB1_1301;DRB1_0403;DRB1_1202;DRB4_0103;DRB1_0101	0.616386798	0.634251796	0.294047156
orf1a polyprotein	2512	2536	TYERHSLSHFVNLDNLRANNTKGSL	DRB1_1602;DQB1-0502_DQA1-0102;DRB1_0401;DRB1_0404;DRB1_0403;DRB1_0407;DRB1_1101;DRB1_1601;DRB1_0102;DRB1_0405;DRB1_0101;DRB1_0802	0.540199433	0.553278709	0.487690743
orf1ab polyprotein	2512	2536	TYERHSLSHFVNLDNLRANNTKGSL	DRB1_1602;DQB1-0502_DQA1-0102;DRB1_0401;DRB1_0404;DRB1_0403;DRB1_0407;DRB1_1101;DRB1_1601;DRB1_0102;DRB1_0405;DRB1_0101;DRB1_0802	0.540199433	0.553278709	0.487690743
orf1ab polyprotein	2510	2534	QKTYERHSLSHFVNLDNLRANNTKG	DRB1_1602;DQB1-0502_DQA1-0102;DRB1_0401;DRB1_0404;DRB1_0403;DRB1_0407;DRB1_1101;DRB1_1601;DRB1_0102;DRB1_0405;DRB1_0101;DRB1_0802	0.540199433	0.553278709	0.487690743
orf1ab polyprotein	2511	2535	KTYERHSLSHFVNLDNLRANNTKGS	DRB1_1602;DQB1-0502_DQA1-0102;DRB1_0401;DRB1_0404;DRB1_0403;DRB1_0407;DRB1_1101;DRB1_1601;DRB1_0102;DRB1_0405;DRB1_0101;DRB1_0802	0.540199433	0.553278709	0.487690743
orf1a polyprotein	2510	2534	QKTYERHSLSHFVNLDNLRANNTKG	DRB1_1602;DQB1-0502_DQA1-0102;DRB1_0401;DRB1_0404;DRB1_0403;DRB1_0407;DRB1_1101;DRB1_1601;DRB1_0102;DRB1_0405;DRB1_0101;DRB1_0802	0.540199433	0.553278709	0.487690743
orf1a polyprotein	2511	2535	KTYERHSLSHFVNLDNLRANNTKGS	DRB1_1602;DQB1-0502_DQA1-0102;DRB1_0401;DRB1_0404;DRB1_0403;DRB1_0407;DRB1_1101;DRB1_1601;DRB1_0102;DRB1_0405;DRB1_0101;DRB1_0802	0.540199433	0.553278709	0.487690743
orf1a polyprotein	522	546	NIGEQKSILSPLYAFASEAARVVRS	DQB1-0201_DQA1-0501;DRB1_1503;DRB1_0404;DRB1_0402;DRB1_1501;DQB1-0202_DQA1-0201	0.614250755	0.631151806	0.278469762
orf1a polyprotein	524	548	GEQKSILSPLYAFASEAARVVRSIF	DQB1-0201_DQA1-0501;DRB1_1503;DRB1_0404;DRB1_0402;DRB1_1501;DQB1-0202_DQA1-0201	0.614250755	0.631151806	0.278469762
orf1ab polyprotein	523	547	IGEQKSILSPLYAFASEAARVVRSI	DQB1-0201_DQA1-0501;DRB1_1503;DRB1_0404;DRB1_0402;DRB1_1501;DQB1-0202_DQA1-0201	0.614250755	0.631151806	0.278469762
orf1ab polyprotein	524	548	GEQKSILSPLYAFASEAARVVRSIF	DQB1-0201_DQA1-0501;DRB1_1503;DRB1_0404;DRB1_0402;DRB1_1501;DQB1-0202_DQA1-0201	0.614250755	0.631151806	0.278469762
orf1ab polyprotein	522	546	NIGEQKSILSPLYAFASEAARVVRS	DQB1-0201_DQA1-0501;DRB1_1503;DRB1_0404;DRB1_0402;DRB1_1501;DQB1-0202_DQA1-0201	0.614250755	0.631151806	0.278469762
orf1ab polyprotein	525	549	EQKSILSPLYAFASEAARVVRSIFS	DQB1-0201_DQA1-0501;DRB1_1503;DRB1_0404;DRB1_0402;DRB1_1501;DQB1-0202_DQA1-0201	0.614250755	0.631151806	0.278469762
orf1a polyprotein	523	547	IGEQKSILSPLYAFASEAARVVRSI	DQB1-0201_DQA1-0501;DRB1_1503;DRB1_0404;DRB1_0402;DRB1_1501;DQB1-0202_DQA1-0201	0.614250755	0.631151806	0.278469762
orf1a polyprotein	525	549	EQKSILSPLYAFASEAARVVRSIFS	DQB1-0201_DQA1-0501;DRB1_1503;DRB1_0404;DRB1_0402;DRB1_1501;DQB1-0202_DQA1-0201	0.614250755	0.631151806	0.278469762
orf1ab polyprotein	2437	2461	YANGGKGFCKLHNWNCVNCDTFCAG	DQB1-0201_DQA1-0501;DRB1_1602;DRB1_1502;DRB1_1601;DRB1_0701;DRB1_0101	0.542088186	0.574438481	0.453380741
orf1ab polyprotein	2438	2462	ANGGKGFCKLHNWNCVNCDTFCAGS	DQB1-0201_DQA1-0501;DRB1_1602;DRB1_1502;DRB1_1601;DRB1_0701;DRB1_0101	0.542088186	0.574438481	0.453380741
orf1ab polyprotein	2436	2460	VYANGGKGFCKLHNWNCVNCDTFCA	DQB1-0201_DQA1-0501;DRB1_1602;DRB1_1502;DRB1_1601;DRB1_0701;DRB1_0101	0.542088186	0.574438481	0.453380741
orf1a polyprotein	2434	2458	FYVYANGGKGFCKLHNWNCVNCDTF	DQB1-0201_DQA1-0501;DRB1_1602;DRB1_1502;DRB1_1601;DRB1_0701;DRB1_0101	0.542088186	0.574438481	0.453380741
orf1ab polyprotein	2435	2459	YVYANGGKGFCKLHNWNCVNCDTFC	DQB1-0201_DQA1-0501;DRB1_1602;DRB1_1502;DRB1_1601;DRB1_0701;DRB1_0101	0.542088186	0.574438481	0.453380741
orf1ab polyprotein	2434	2458	FYVYANGGKGFCKLHNWNCVNCDTF	DQB1-0201_DQA1-0501;DRB1_1602;DRB1_1502;DRB1_1601;DRB1_0701;DRB1_0101	0.542088186	0.574438481	0.453380741
orf1a polyprotein	2436	2460	VYANGGKGFCKLHNWNCVNCDTFCA	DQB1-0201_DQA1-0501;DRB1_1602;DRB1_1502;DRB1_1601;DRB1_0701;DRB1_0101	0.542088186	0.574438481	0.453380741
orf1a polyprotein	2437	2461	YANGGKGFCKLHNWNCVNCDTFCAG	DQB1-0201_DQA1-0501;DRB1_1602;DRB1_1502;DRB1_1601;DRB1_0701;DRB1_0101	0.542088186	0.574438481	0.453380741
orf1a polyprotein	2438	2462	ANGGKGFCKLHNWNCVNCDTFCAGS	DQB1-0201_DQA1-0501;DRB1_1602;DRB1_1502;DRB1_1601;DRB1_0701;DRB1_0101	0.542088186	0.574438481	0.453380741
orf1a polyprotein	2435	2459	YVYANGGKGFCKLHNWNCVNCDTFC	DQB1-0201_DQA1-0501;DRB1_1602;DRB1_1502;DRB1_1601;DRB1_0701;DRB1_0101	0.542088186	0.574438481	0.453380741
orf1ab polyprotein	869	893	NEFACVVADAVIKTLQPVSELLTPL	DQB1-0201_DQA1-0501;DRB1_1503;DPB1-1401_DPA1-0201;DQB1-0302_DQA1-0301;DPB1-1701_DPA1-0201;DRB1_0803;DPB1-0901_DPA1-0201;DRB1_0101	0.540182978	0.541681741	0.496931123
orf1a polyprotein	869	893	NEFACVVADAVIKTLQPVSELLTPL	DQB1-0201_DQA1-0501;DRB1_1503;DPB1-1401_DPA1-0201;DQB1-0302_DQA1-0301;DPB1-1701_DPA1-0201;DRB1_0803;DPB1-0901_DPA1-0201;DRB1_0101	0.540182978	0.541681741	0.496931123
envelope protein	4	28	FVSEETGTLIVNSVLLFLAFVVFLL	DQB1-0602_DQA1-0102;DRB1_0301;DRB3_0202;DRB3_0201;DRB1_1402;DRB1_0302;DRB3_0301;DRB1_1406	0.64658872	0.649595994	0.173344013
envelope protein	5	29	VSEETGTLIVNSVLLFLAFVVFLLV	DQB1-0602_DQA1-0102;DRB1_0301;DRB3_0202;DRB3_0201;DRB1_1402;DRB1_0302;DRB3_0301;DRB1_1406	0.64658872	0.649595994	0.173344013
envelope protein	3	27	SFVSEETGTLIVNSVLLFLAFVVFL	DQB1-0602_DQA1-0102;DRB1_0301;DRB3_0202;DRB3_0201;DRB1_1402;DRB1_0302;DRB3_0301;DRB1_1406	0.64658872	0.649595994	0.173344013
orf1ab polyprotein	1401	1425	TIQRKYKGIKIQEGVVDYGARFYFY	DQB1-0602_DQA1-0102;DRB1_0407;DQB1-0604_DQA1-0102;DRB4_0103;DPB1-0601_DPA1-0103	0.673244183	0.667655048	0.095429579
orf1a polyprotein	1400	1424	STIQRKYKGIKIQEGVVDYGARFYF	DQB1-0602_DQA1-0102;DRB1_0407;DQB1-0604_DQA1-0102;DRB4_0103;DPB1-0601_DPA1-0103	0.673244183	0.667655048	0.095429579
orf1a polyprotein	1401	1425	TIQRKYKGIKIQEGVVDYGARFYFY	DQB1-0602_DQA1-0102;DRB1_0407;DQB1-0604_DQA1-0102;DRB4_0103;DPB1-0601_DPA1-0103	0.673244183	0.667655048	0.095429579
orf1ab polyprotein	1400	1424	STIQRKYKGIKIQEGVVDYGARFYF	DQB1-0602_DQA1-0102;DRB1_0407;DQB1-0604_DQA1-0102;DRB4_0103;DPB1-0601_DPA1-0103	0.673244183	0.667655048	0.095429579
nucleocapsid phosphoprotein	345	369	NFKDQVILLNKHIDAYKTFPPTEPK	DRB1_1102;DQB1-0602_DQA1-0102;DRB1_1502;DRB3_0202;DRB3_0301;DRB1_1303;DRB3_0201;DRB1_0803;DRB1_1104;DRB1_1406;DRB1_0801	0.614821681	0.605477881	0.323455322
nucleocapsid phosphoprotein	346	370	FKDQVILLNKHIDAYKTFPPTEPKK	DRB1_1102;DQB1-0602_DQA1-0102;DRB1_1502;DRB3_0202;DRB3_0301;DRB1_1303;DRB3_0201;DRB1_0803;DRB1_1104;DRB1_1406;DRB1_0801	0.614821681	0.605477881	0.323455322
nucleocapsid phosphoprotein	344	368	PNFKDQVILLNKHIDAYKTFPPTEP	DRB1_1102;DQB1-0602_DQA1-0102;DRB1_1502;DRB3_0202;DRB3_0301;DRB1_1303;DRB3_0201;DRB1_0803;DRB1_1104;DRB1_1406;DRB1_0801	0.614821681	0.605477881	0.323455322
surface glycoprotein	297	321	SETKCTLKSFTVEKGIYQTSNFRVQ	DQB1-0401_DQA1-0301;DQB1-0602_DQA1-0102;DRB5_0102;DQB1-0501_DQA1-0101;DRB1_0701;DRB1_0402	0.593128915	0.60694304	0.337833885
orf1ab polyprotein	5017	5041	AMPNMLRIMASLVLARKHTTCCSLS	DRB1_1502;DRB1_0401;DRB1_0404;DRB5_0102;DRB1_1303;DPB1-0501_DPA1-0201;DRB1_0406;DRB1_0102;DRB1_0402;DRB1_0101;DQB1-0301_DQA1-0505;DRB1_1406;DPB1-0601_DPA1-0103	0.5702136	0.606126386	0.373141945
ORF3a protein	59	83	ASKIITLKKRWQLALSKGVHFVCNL	DPB1-0101_DPA1-0202;DPB1-1401_DPA1-0201;DRB1_1301;DPB1-1301_DPA1-0201;DRB1_0901;DRB1_1601;DRB1_1202;DRB1_1401;DRB1_0804;DRB1_0701;DRB1_1404;DRB1_1104	0.499218536	0.503325351	0.565541948
orf1a polyprotein	2398	2422	VHVVDGCNSSTCMMCYKRNRATRVE	DRB3_0202;DRB1_0101;DRB1_1301;DRB1_0701	0.604163872	0.649658699	0.24865776
orf1ab polyprotein	2398	2422	VHVVDGCNSSTCMMCYKRNRATRVE	DRB3_0202;DRB1_0101;DRB1_1301;DRB1_0701	0.604163872	0.649658699	0.24865776
orf1a polyprotein	2175	2199	LLLQLCTFTRSTNSRIKASMPTTIA	DQB1-0602_DQA1-0102;DRB1_1601;DRB1_0901;DRB1_0701;DRB1_0101	0.550463668	0.584342157	0.422270671
orf1ab polyprotein	2175	2199	LLLQLCTFTRSTNSRIKASMPTTIA	DQB1-0602_DQA1-0102;DRB1_1601;DRB1_0901;DRB1_0701;DRB1_0101	0.550463668	0.584342157	0.422270671
ORF3a protein	134	158	RSKNPLLYDANYFLCWHTNCYDYCI	DPB1-0401_DPA1-0103;DRB1_1402;DRB1_0402	0.68738932	0.684619156	0.087588451
ORF3a protein	133	157	CRSKNPLLYDANYFLCWHTNCYDYC	DPB1-0401_DPA1-0103;DRB1_1402;DRB1_0402	0.68738932	0.684619156	0.087588451
orf1a polyprotein	2263	2287	CTGYREGYLNSTNVTIATYCTGSIP	DRB1_1501;DQB1-0602_DQA1-0102;DRB1_0701	0.568468914	0.621193213	0.346160865
orf1ab polyprotein	2263	2287	CTGYREGYLNSTNVTIATYCTGSIP	DRB1_1501;DQB1-0602_DQA1-0102;DRB1_0701	0.568468914	0.621193213	0.346160865
envelope protein	6	30	SEETGTLIVNSVLLFLAFVVFLLVT	DQB1-0602_DQA1-0102;DRB1_0301;DRB3_0202;DRB3_0201;DRB1_1402;DRB1_0302;DRB3_0301	0.642763557	0.649547701	0.168375723
orf1a polyprotein	2016	2040	TKPVETSNSFDVLKSEDAQGMDNLA	DRB1_1602;DRB1_1502;DRB1_0401;DRB1_1601;DRB1_0403;DRB1_0404;DRB5_0102;DRB1_0102;DRB1_0101;DRB1_1001;DQB1-0202_DQA1-0201	0.564808069	0.599773852	0.379197832
orf1ab polyprotein	2014	2038	WSTKPVETSNSFDVLKSEDAQGMDN	DRB1_1602;DRB1_1502;DRB1_0401;DRB1_1601;DRB1_0403;DRB1_0404;DRB5_0102;DRB1_0102;DRB1_0101;DRB1_1001;DQB1-0202_DQA1-0201	0.564808069	0.599773852	0.379197832
orf1a polyprotein	2015	2039	STKPVETSNSFDVLKSEDAQGMDNL	DRB1_1602;DRB1_1502;DRB1_0401;DRB1_1601;DRB1_0403;DRB1_0404;DRB5_0102;DRB1_0102;DRB1_0101;DRB1_1001;DQB1-0202_DQA1-0201	0.564808069	0.599773852	0.379197832
orf1ab polyprotein	2016	2040	TKPVETSNSFDVLKSEDAQGMDNLA	DRB1_1602;DRB1_1502;DRB1_0401;DRB1_1601;DRB1_0403;DRB1_0404;DRB5_0102;DRB1_0102;DRB1_0101;DRB1_1001;DQB1-0202_DQA1-0201	0.564808069	0.599773852	0.379197832
orf1a polyprotein	2018	2042	PVETSNSFDVLKSEDAQGMDNLACE	DRB1_1602;DRB1_1502;DRB1_0401;DRB1_1601;DRB1_0403;DRB1_0404;DRB5_0102;DRB1_0102;DRB1_0101;DRB1_1001;DQB1-0202_DQA1-0201	0.564808069	0.599773852	0.379197832
orf1ab polyprotein	2017	2041	KPVETSNSFDVLKSEDAQGMDNLAC	DRB1_1602;DRB1_1502;DRB1_0401;DRB1_1601;DRB1_0403;DRB1_0404;DRB5_0102;DRB1_0102;DRB1_0101;DRB1_1001;DQB1-0202_DQA1-0201	0.564808069	0.599773852	0.379197832
orf1a polyprotein	2014	2038	WSTKPVETSNSFDVLKSEDAQGMDN	DRB1_1602;DRB1_1502;DRB1_0401;DRB1_1601;DRB1_0403;DRB1_0404;DRB5_0102;DRB1_0102;DRB1_0101;DRB1_1001;DQB1-0202_DQA1-0201	0.564808069	0.599773852	0.379197832
orf1a polyprotein	2017	2041	KPVETSNSFDVLKSEDAQGMDNLAC	DRB1_1602;DRB1_1502;DRB1_0401;DRB1_1601;DRB1_0403;DRB1_0404;DRB5_0102;DRB1_0102;DRB1_0101;DRB1_1001;DQB1-0202_DQA1-0201	0.564808069	0.599773852	0.379197832
orf1ab polyprotein	2015	2039	STKPVETSNSFDVLKSEDAQGMDNL	DRB1_1602;DRB1_1502;DRB1_0401;DRB1_1601;DRB1_0403;DRB1_0404;DRB5_0102;DRB1_0102;DRB1_0101;DRB1_1001;DQB1-0202_DQA1-0201	0.564808069	0.599773852	0.379197832
orf1ab polyprotein	2018	2042	PVETSNSFDVLKSEDAQGMDNLACE	DRB1_1602;DRB1_1502;DRB1_0401;DRB1_1601;DRB1_0403;DRB1_0404;DRB5_0102;DRB1_0102;DRB1_0101;DRB1_1001;DQB1-0202_DQA1-0201	0.564808069	0.599773852	0.379197832
orf1ab polyprotein	5648	5672	YLPIDKCSRIIPARARVECFDKFKV	DQB1-0602_DQA1-0102;DQB1-0303_DQA1-0201;DQB1-0302_DQA1-0301;DRB1_0901;DRB5_0202;DQB1-0303_DQA1-0301	0.511791377	0.502093308	0.548622791
orf1ab polyprotein	5645	5669	ALKYLPIDKCSRIIPARARVECFDK	DQB1-0602_DQA1-0102;DQB1-0303_DQA1-0201;DQB1-0302_DQA1-0301;DRB1_0901;DRB5_0202;DQB1-0303_DQA1-0301	0.511791377	0.502093308	0.548622791
orf1ab polyprotein	5646	5670	LKYLPIDKCSRIIPARARVECFDKF	DQB1-0602_DQA1-0102;DQB1-0303_DQA1-0201;DQB1-0302_DQA1-0301;DRB1_0901;DRB5_0202;DQB1-0303_DQA1-0301	0.511791377	0.502093308	0.548622791
orf1ab polyprotein	5647	5671	KYLPIDKCSRIIPARARVECFDKFK	DQB1-0602_DQA1-0102;DQB1-0303_DQA1-0201;DQB1-0302_DQA1-0301;DRB1_0901;DRB5_0202;DQB1-0303_DQA1-0301	0.511791377	0.502093308	0.548622791
orf1ab polyprotein	5649	5673	LPIDKCSRIIPARARVECFDKFKVN	DQB1-0602_DQA1-0102;DQB1-0303_DQA1-0201;DQB1-0302_DQA1-0301;DRB1_0901;DRB5_0202;DQB1-0303_DQA1-0301	0.511791377	0.502093308	0.548622791
orf1a polyprotein	4279	4303	AYKDYLASGGQPITNCVKMLCTHTG	DRB1_1102;DPB1-0202_DPA1-0103;DRB1_0901;DRB1_1401;DRB1_0701;DRB1_0101;DQB1-0301_DQA1-0505;DRB1_1406	0.554751534	0.576147595	0.419538866
orf1ab polyprotein	4279	4303	AYKDYLASGGQPITNCVKMLCTHTG	DRB1_1102;DPB1-0202_DPA1-0103;DRB1_0901;DRB1_1401;DRB1_0701;DRB1_0101;DQB1-0301_DQA1-0505;DRB1_1406	0.554751534	0.576147595	0.419538866
orf1a polyprotein	726	750	ETGLLMPLKAPKEIIFLEGETLPTE	DPB1-0101_DPA1-0202;DRB1_1601;DRB1_1202;DQB1-0601_DQA1-0103;DRB1_1201;DRB1_0102;DRB1_1401;DRB1_0405;DRB1_1501;DRB1_0101	0.477690199	0.52537155	0.554440346
orf1ab polyprotein	726	750	ETGLLMPLKAPKEIIFLEGETLPTE	DPB1-0101_DPA1-0202;DRB1_1601;DRB1_1202;DQB1-0601_DQA1-0103;DRB1_1201;DRB1_0102;DRB1_1401;DRB1_0405;DRB1_1501;DRB1_0101	0.477690199	0.52537155	0.554440346
orf1ab polyprotein	6756	6780	EIIKSQDLSVVSKVVKVTIDYTEIS	DRB4_0103;DPB1-0201_DPA1-0103;DRB1_1402	0.605295599	0.601892507	0.347501553
orf1ab polyprotein	6758	6782	IKSQDLSVVSKVVKVTIDYTEISFM	DRB4_0103;DPB1-0201_DPA1-0103;DRB1_1402	0.605295599	0.601892507	0.347501553
orf1ab polyprotein	6757	6781	IIKSQDLSVVSKVVKVTIDYTEISF	DRB4_0103;DPB1-0201_DPA1-0103;DRB1_1402	0.605295599	0.601892507	0.347501553
orf1ab polyprotein	6755	6779	VEIIKSQDLSVVSKVVKVTIDYTEI	DRB4_0103;DPB1-0201_DPA1-0103;DRB1_1402	0.605295599	0.601892507	0.347501553
orf1ab polyprotein	6754	6778	FVEIIKSQDLSVVSKVVKVTIDYTE	DRB4_0103;DPB1-0201_DPA1-0103;DRB1_1402	0.605295599	0.601892507	0.347501553
orf1ab polyprotein	6759	6783	KSQDLSVVSKVVKVTIDYTEISFML	DRB4_0103;DPB1-0201_DPA1-0103;DRB1_1402	0.605295599	0.601892507	0.347501553
ORF3a protein	196	220	GVKDCVVLHSYFTSDYYQLYSTQLS	DPB1-0101_DPA1-0103;DPB1-0401_DPA1-0103;DRB1_1601	0.683606475	0.68518579	0.080833949
orf1ab polyprotein	3638	3662	LFLLPSLATVAYFNMVYMPASWVMR	DQB1-0302_DQA1-0301;DQB1-0501_DQA1-0101;DRB1_0102;DRB1_0101;DQB1-0202_DQA1-0201	0.620866763	0.63542628	0.241059625
orf1ab polyprotein	3639	3663	FLLPSLATVAYFNMVYMPASWVMRI	DQB1-0302_DQA1-0301;DQB1-0501_DQA1-0101;DRB1_0102;DRB1_0101;DQB1-0202_DQA1-0201	0.620866763	0.63542628	0.241059625
orf1a polyprotein	3640	3664	LLPSLATVAYFNMVYMPASWVMRIM	DQB1-0302_DQA1-0301;DQB1-0501_DQA1-0101;DRB1_0102;DRB1_0101;DQB1-0202_DQA1-0201	0.620866763	0.63542628	0.241059625
orf1ab polyprotein	3640	3664	LLPSLATVAYFNMVYMPASWVMRIM	DQB1-0302_DQA1-0301;DQB1-0501_DQA1-0101;DRB1_0102;DRB1_0101;DQB1-0202_DQA1-0201	0.620866763	0.63542628	0.241059625
orf1a polyprotein	3638	3662	LFLLPSLATVAYFNMVYMPASWVMR	DQB1-0302_DQA1-0301;DQB1-0501_DQA1-0101;DRB1_0102;DRB1_0101;DQB1-0202_DQA1-0201	0.620866763	0.63542628	0.241059625
orf1a polyprotein	3639	3663	FLLPSLATVAYFNMVYMPASWVMRI	DQB1-0302_DQA1-0301;DQB1-0501_DQA1-0101;DRB1_0102;DRB1_0101;DQB1-0202_DQA1-0201	0.620866763	0.63542628	0.241059625
orf1a polyprotein	4276	4300	AAKAYKDYLASGGQPITNCVKMLCT	DPB1-0101_DPA1-0201;DPB1-0202_DPA1-0103;DRB1_0901;DRB1_1601;DRB1_0701;DRB1_0101;DQB1-0301_DQA1-0505	0.56186427	0.594883574	0.378315059
orf1ab polyprotein	4276	4300	AAKAYKDYLASGGQPITNCVKMLCT	DPB1-0101_DPA1-0201;DPB1-0202_DPA1-0103;DRB1_0901;DRB1_1601;DRB1_0701;DRB1_0101;DQB1-0301_DQA1-0505	0.56186427	0.594883574	0.378315059
orf1ab polyprotein	482	506	ASTSAFVETVKGLDYKAFKQIVESC	DPB1-0202_DPA1-0103;DRB1_1101;DRB1_1202;DRB1_1201;DPB1-0201_DPA1-0103;DQB1-0202_DQA1-0201;DRB1_0801	0.514784783	0.510544018	0.537868262
orf1a polyprotein	482	506	ASTSAFVETVKGLDYKAFKQIVESC	DPB1-0202_DPA1-0103;DRB1_1101;DRB1_1202;DRB1_1201;DPB1-0201_DPA1-0103;DQB1-0202_DQA1-0201;DRB1_0801	0.514784783	0.510544018	0.537868262
envelope protein	29	53	VTLAILTALRLCAYCCNIVNVSLVK	DRB1_1502;DRB5_0102;DRB1_1202;DRB1_1101;DQB1-0501_DQA1-0101;DRB1_1201;DRB1_0102;DRB1_1104;DRB1_0101	0.522903713	0.532969742	0.50167156
envelope protein	28	52	LVTLAILTALRLCAYCCNIVNVSLV	DRB1_1502;DRB5_0102;DRB1_1202;DRB1_1101;DQB1-0501_DQA1-0101;DRB1_1201;DRB1_0102;DRB1_1104;DRB1_0101	0.522903713	0.532969742	0.50167156
orf1ab polyprotein	5286	5310	ELTGHMLDMYSVMLTNDNTSRYWEP	DRB1_0403;DPB1-0501_DPA1-0202;DRB1_0404;DRB1_0405;DRB3_0101;DRB1_1001	0.43172937	0.416412397	0.714530178
orf1a polyprotein	534	558	YAFASEAARVVRSIFSRTLETAQNS	DQB1-0602_DQA1-0102;DRB1_1601;DQB1-0201_DQA1-0201;DPB1-0402_DPA1-0103;DRB1_1501	0.551932335	0.58769557	0.397084617
orf1ab polyprotein	534	558	YAFASEAARVVRSIFSRTLETAQNS	DQB1-0602_DQA1-0102;DRB1_1601;DQB1-0201_DQA1-0201;DPB1-0402_DPA1-0103;DRB1_1501	0.551932335	0.58769557	0.397084617
orf1a polyprotein	521	545	WNIGEQKSILSPLYAFASEAARVVR	DQB1-0201_DQA1-0501;DRB1_1503;DRB1_0404;DRB1_1501;DQB1-0202_DQA1-0201	0.605066144	0.62223903	0.272606213
orf1ab polyprotein	521	545	WNIGEQKSILSPLYAFASEAARVVR	DQB1-0201_DQA1-0501;DRB1_1503;DRB1_0404;DRB1_1501;DQB1-0202_DQA1-0201	0.605066144	0.62223903	0.272606213
orf1a polyprotein	1237	1261	EEVTTTLEETKFLTENLLLYIDING	DPB1-0101_DPA1-0103;DPB1-0401_DPA1-0103;DRB1_0302	0.684878738	0.678436181	0.080319
orf1ab polyprotein	1237	1261	EEVTTTLEETKFLTENLLLYIDING	DPB1-0101_DPA1-0103;DPB1-0401_DPA1-0103;DRB1_0302	0.684878738	0.678436181	0.080319
orf1ab polyprotein	5860	5884	SQGSEYDYVIFTQTTETAHSCNVNR	DRB1_0403;DRB1_0404;DRB1_0406;DPB1-0402_DPA1-0103;DRB4_0103	0.628771337	0.626427935	0.242572166
surface glycoprotein	426	450	PDDFTGCVIAWNSNNLDSKVGGNYN	DRB1_1503;DRB1_0410;DRB1_1301;DRB5_0202;DQB1-0604_DQA1-0102;DRB1_0411;DQB1-0303_DQA1-0301;DRB1_0302;DRB1_1501;DQB1-0301_DQA1-0505;DRB1_1406	0.559172155	0.562473294	0.417560714
orf1ab polyprotein	5688	5712	PETTADIVVFDEISMATNYDLSVVN	DRB1_1503;DRB1_1301;DRB1_0301;DRB1_0901;DRB1_1501	0.522007053	0.570699856	0.451007916
orf1a polyprotein	3168	3192	NGVSFSTFEEAALCTFLLNKEMYLK	DRB1_1503;DRB3_0202;DQB1-0303_DQA1-0301;DPB1-0402_DPA1-0103;DQB1-0202_DQA1-0201	0.587861197	0.572983976	0.369933482
orf1ab polyprotein	3168	3192	NGVSFSTFEEAALCTFLLNKEMYLK	DRB1_1503;DRB3_0202;DQB1-0303_DQA1-0301;DPB1-0402_DPA1-0103;DQB1-0202_DQA1-0201	0.587861197	0.572983976	0.369933482
orf1ab polyprotein	5034	5058	HTTCCSLSHRFYRLANECAQVLSEM	DRB1_1602;DRB1_0401;DQB1-0302_DQA1-0301;DRB1_1601;DRB1_1202;DPB1-1701_DPA1-0201;DPB1-0301_DPA1-0103;DRB1_0101;DPB1-0601_DPA1-0103	0.56005867	0.601493232	0.361517772
orf1ab polyprotein	5035	5059	TTCCSLSHRFYRLANECAQVLSEMV	DRB1_1602;DRB1_0401;DQB1-0302_DQA1-0301;DRB1_1601;DRB1_1202;DPB1-1701_DPA1-0201;DPB1-0301_DPA1-0103;DRB1_0101;DPB1-0601_DPA1-0103	0.56005867	0.601493232	0.361517772
orf1a polyprotein	3897	3921	DILLAKDTTEAFEKMVSLLSVLLSM	DRB1_1102;DRB1_0401;DRB1_1601;DRB1_0407;DRB1_1101;DRB1_0101;DRB1_1001;DRB3_0101	0.608015522	0.640695664	0.226426979
orf1ab polyprotein	3897	3921	DILLAKDTTEAFEKMVSLLSVLLSM	DRB1_1102;DRB1_0401;DRB1_1601;DRB1_0407;DRB1_1101;DRB1_0101;DRB1_1001;DRB3_0101	0.608015522	0.640695664	0.226426979
surface glycoprotein	418	442	IADYNYKLPDDFTGCVIAWNSNNLD	DQB1-0303_DQA1-0201;DQB1-0602_DQA1-0102;DQB1-0604_DQA1-0102;DQB1-0601_DQA1-0103;DQB1-0303_DQA1-0301;DQB1-0301_DQA1-0505	0.55897119	0.55897119	0.420879
orf1a polyprotein	1534	1558	SVYYTSNPTTFHLDGEVITFDNLKT	DQB1-0201_DQA1-0501;DRB1_1503;DRB1_0301;DRB1_0302;DRB1_1501	0.570490687	0.602325085	0.342192447
orf1ab polyprotein	1534	1558	SVYYTSNPTTFHLDGEVITFDNLKT	DQB1-0201_DQA1-0501;DRB1_1503;DRB1_0301;DRB1_0302;DRB1_1501	0.570490687	0.602325085	0.342192447
ORF3a protein	103	127	APFLYLYALVYFLQSINFVRIIMRL	DRB5_0102;DRB1_1202;DRB5_0101;DRB1_1201;DPB1-0402_DPA1-0103;DQB1-0301_DQA1-0505	0.60577344	0.598204623	0.304016092
orf1ab polyprotein	6700	6724	LHLLIGLAKRFKESPFELEDFIPMD	DPB1-0101_DPA1-0103;DPB1-0401_DPA1-0103	0.67839759	0.67839759	0.080319
ORF3a protein	195	219	SGVKDCVVLHSYFTSDYYQLYSTQL	DPB1-0101_DPA1-0103;DPB1-0401_DPA1-0103	0.67839759	0.67839759	0.080319
orf1ab polyprotein	6699	6723	GLHLLIGLAKRFKESPFELEDFIPM	DPB1-0101_DPA1-0103;DPB1-0401_DPA1-0103	0.67839759	0.67839759	0.080319
orf1a polyprotein	1324	1348	NYITTYPGQGLNGYTVEEAKTVLKK	DQB1-0201_DQA1-0501;DQB1-0401_DQA1-0301;DQB1-0502_DQA1-0102;DQB1-0501_DQA1-0101;DQB1-0402_DQA1-0401;DRB1_0101	0.544172377	0.565795041	0.418601558
orf1ab polyprotein	1324	1348	NYITTYPGQGLNGYTVEEAKTVLKK	DQB1-0201_DQA1-0501;DQB1-0401_DQA1-0301;DQB1-0502_DQA1-0102;DQB1-0501_DQA1-0101;DQB1-0402_DQA1-0401;DRB1_0101	0.544172377	0.565795041	0.418601558
surface glycoprotein	235	259	ITRFQTLLALHRSYLTPGDSSSGWT	DRB1_1301;DQB1-0502_DQA1-0102;DPB1-0101_DPA1-0103;DRB1_0406;DRB1_1405;DPB1-0301_DPA1-0103;DRB1_1401;DRB1_0402;DRB1_1501;DRB1_1404;DPB1-0601_DPA1-0103	0.518511813	0.564100855	0.454489378
surface glycoprotein	234	258	NITRFQTLLALHRSYLTPGDSSSGW	DRB1_1301;DQB1-0502_DQA1-0102;DPB1-0101_DPA1-0103;DRB1_0406;DRB1_1405;DPB1-0301_DPA1-0103;DRB1_1401;DRB1_0402;DRB1_1501;DRB1_1404;DPB1-0601_DPA1-0103	0.518511813	0.564100855	0.454489378
orf1ab polyprotein	4425	4449	RAFDIYNDKVAGFAKFLKTNCCRFQ	DRB1_1301;DRB1_1502;DRB1_0301;DPB1-1701_DPA1-0201;DPB1-0402_DPA1-0103;DPB1-0901_DPA1-0201	0.490990413	0.521245605	0.523711473
orf1ab polyprotein	4424	4448	YRAFDIYNDKVAGFAKFLKTNCCRF	DRB1_1301;DRB1_1502;DRB1_0301;DPB1-1701_DPA1-0201;DPB1-0402_DPA1-0103;DPB1-0901_DPA1-0201	0.490990413	0.521245605	0.523711473
orf1ab polyprotein	5018	5042	MPNMLRIMASLVLARKHTTCCSLSH	DRB1_1502;DRB1_0401;DRB1_0404;DRB1_1303;DPB1-0501_DPA1-0201;DRB1_0406;DRB1_0102;DRB1_0402;DRB1_0101;DQB1-0301_DQA1-0505;DRB1_1406;DPB1-0601_DPA1-0103	0.55431328	0.591554691	0.373141945
ORF6 protein	8	32	QVTIAEILLIIMRTFKVSIWNLDYI	DPB1-0202_DPA1-0103;DPB1-0101_DPA1-0103;DPB1-0501_DPA1-0202;DPB1-0201_DPA1-0103;DPB1-0601_DPA1-0103	0.289418438	0.289418438	0.830256
ORF6 protein	11	35	IAEILLIIMRTFKVSIWNLDYIINL	DPB1-0202_DPA1-0103;DPB1-0101_DPA1-0103;DPB1-0501_DPA1-0202;DPB1-0201_DPA1-0103;DPB1-0601_DPA1-0103	0.289418438	0.289418438	0.830256
ORF6 protein	10	34	TIAEILLIIMRTFKVSIWNLDYIIN	DPB1-0202_DPA1-0103;DPB1-0101_DPA1-0103;DPB1-0501_DPA1-0202;DPB1-0201_DPA1-0103;DPB1-0601_DPA1-0103	0.289418438	0.289418438	0.830256
ORF6 protein	6	30	DFQVTIAEILLIIMRTFKVSIWNLD	DPB1-0501_DPA1-0202;DPB1-0601_DPA1-0103;DPB1-0201_DPA1-0103;DPB1-0202_DPA1-0103	0.289418438	0.289418438	0.830256
ORF6 protein	9	33	VTIAEILLIIMRTFKVSIWNLDYII	DPB1-0202_DPA1-0103;DPB1-0101_DPA1-0103;DPB1-0501_DPA1-0202;DPB1-0201_DPA1-0103;DPB1-0601_DPA1-0103	0.289418438	0.289418438	0.830256
ORF6 protein	7	31	FQVTIAEILLIIMRTFKVSIWNLDY	DPB1-0202_DPA1-0103;DPB1-0101_DPA1-0103;DPB1-0501_DPA1-0202;DPB1-0201_DPA1-0103;DPB1-0601_DPA1-0103	0.289418438	0.289418438	0.830256
orf1ab polyprotein	5471	5495	LSYGIATVREVLSDRELHLSWEVGK	DRB1_1503;DRB1_0301;DQB1-0302_DQA1-0301;DQB1-0201_DQA1-0201;DRB3_0301;DQB1-0202_DQA1-0201;DPB1-0601_DPA1-0103	0.580084995	0.585025827	0.334651542
orf1ab polyprotein	5472	5496	SYGIATVREVLSDRELHLSWEVGKP	DRB1_1503;DRB1_0301;DQB1-0302_DQA1-0301;DQB1-0201_DQA1-0201;DRB3_0301;DQB1-0202_DQA1-0201;DPB1-0601_DPA1-0103	0.580084995	0.585025827	0.334651542
orf1ab polyprotein	2019	2043	VETSNSFDVLKSEDAQGMDNLACED	DRB1_1602;DRB1_1502;DRB1_0401;DRB1_1601;DRB1_0403;DRB1_0404;DRB1_0102;DRB1_0101;DRB1_1001;DQB1-0202_DQA1-0201	0.548707767	0.58496714	0.379197832
orf1a polyprotein	2019	2043	VETSNSFDVLKSEDAQGMDNLACED	DRB1_1602;DRB1_1502;DRB1_0401;DRB1_1601;DRB1_0403;DRB1_0404;DRB1_0102;DRB1_0101;DRB1_1001;DQB1-0202_DQA1-0201	0.548707767	0.58496714	0.379197832
orf1ab polyprotein	864	888	LGTEVNEFACVVADAVIKTLQPVSE	DQB1-0602_DQA1-0102;DRB5_0102;DPB1-1101_DPA1-0201;DRB1_0701;DRB1_0101;DRB1_1001	0.571197458	0.606289086	0.313571511
orf1a polyprotein	861	885	TVELGTEVNEFACVVADAVIKTLQP	DQB1-0602_DQA1-0102;DRB5_0102;DPB1-1101_DPA1-0201;DRB1_0701;DRB1_0101;DRB1_1001	0.571197458	0.606289086	0.313571511
orf1a polyprotein	863	887	ELGTEVNEFACVVADAVIKTLQPVS	DQB1-0602_DQA1-0102;DRB5_0102;DPB1-1101_DPA1-0201;DRB1_0701;DRB1_0101;DRB1_1001	0.571197458	0.606289086	0.313571511
orf1a polyprotein	864	888	LGTEVNEFACVVADAVIKTLQPVSE	DQB1-0602_DQA1-0102;DRB5_0102;DPB1-1101_DPA1-0201;DRB1_0701;DRB1_0101;DRB1_1001	0.571197458	0.606289086	0.313571511
orf1ab polyprotein	861	885	TVELGTEVNEFACVVADAVIKTLQP	DQB1-0602_DQA1-0102;DRB5_0102;DPB1-1101_DPA1-0201;DRB1_0701;DRB1_0101;DRB1_1001	0.571197458	0.606289086	0.313571511
orf1a polyprotein	862	886	VELGTEVNEFACVVADAVIKTLQPV	DQB1-0602_DQA1-0102;DRB5_0102;DPB1-1101_DPA1-0201;DRB1_0701;DRB1_0101;DRB1_1001	0.571197458	0.606289086	0.313571511
orf1ab polyprotein	862	886	VELGTEVNEFACVVADAVIKTLQPV	DQB1-0602_DQA1-0102;DRB5_0102;DPB1-1101_DPA1-0201;DRB1_0701;DRB1_0101;DRB1_1001	0.571197458	0.606289086	0.313571511
orf1ab polyprotein	863	887	ELGTEVNEFACVVADAVIKTLQPVS	DQB1-0602_DQA1-0102;DRB5_0102;DPB1-1101_DPA1-0201;DRB1_0701;DRB1_0101;DRB1_1001	0.571197458	0.606289086	0.313571511
orf1ab polyprotein	5790	5814	DKSAQCFKMFYKGVITHDVSSAINR	DQB1-0201_DQA1-0501;DQB1-0502_DQA1-0102;DQB1-0303_DQA1-0301;DRB3_0101;DRB1_0801	0.523558357	0.529878757	0.497628417
orf1ab polyprotein	649	673	VKFISTCACEIVGGQIVTCAKEIKE	DPB1-1001_DPA1-0201;DQB1-0303_DQA1-0201;DQB1-0302_DQA1-0301;DQB1-0301_DQA1-0303;DPB1-1701_DPA1-0201;DRB1_0406;DRB1_0302;DPB1-1101_DPA1-0201;DPB1-0901_DPA1-0201;DQB1-0301_DQA1-0505	0.59385661	0.584086625	0.34290126
orf1a polyprotein	649	673	VKFISTCACEIVGGQIVTCAKEIKE	DPB1-1001_DPA1-0201;DQB1-0303_DQA1-0201;DQB1-0302_DQA1-0301;DQB1-0301_DQA1-0303;DPB1-1701_DPA1-0201;DRB1_0406;DRB1_0302;DPB1-1101_DPA1-0201;DPB1-0901_DPA1-0201;DQB1-0301_DQA1-0505	0.59385661	0.584086625	0.34290126
orf1a polyprotein	2509	2533	GQKTYERHSLSHFVNLDNLRANNTK	DRB1_1602;DQB1-0502_DQA1-0102;DRB1_0401;DRB1_0403;DRB1_0404;DRB1_0407;DRB1_1101;DRB1_1601;DRB1_0405;DRB1_0101;DRB1_0802	0.510595417	0.53050403	0.487321116
orf1ab polyprotein	2509	2533	GQKTYERHSLSHFVNLDNLRANNTK	DRB1_1602;DQB1-0502_DQA1-0102;DRB1_0401;DRB1_0403;DRB1_0404;DRB1_0407;DRB1_1101;DRB1_1601;DRB1_0405;DRB1_0101;DRB1_0802	0.510595417	0.53050403	0.487321116
nucleocapsid phosphoprotein	119	143	AGLPYGANKDGIIWVATEGALNTPK	DRB1_1503;DPB1-0101_DPA1-0201;DQB1-0602_DQA1-0102;DRB1_0401;DRB1_0403;DRB1_0404;DRB1_0407;DQB1-0202_DQA1-0201	0.631082091	0.6318877	0.169377601
orf1ab polyprotein	1314	1338	AKALRKVPTDNYITTYPGQGLNGYT	DRB1_1503;DQB1-0602_DQA1-0102;DQB1-0303_DQA1-0201;DRB5_0202;DRB1_1101;DRB1_1501;DRB1_0802	0.584857646	0.585751132	0.319007726
orf1a polyprotein	1314	1338	AKALRKVPTDNYITTYPGQGLNGYT	DRB1_1503;DQB1-0602_DQA1-0102;DQB1-0303_DQA1-0201;DRB5_0202;DRB1_1101;DRB1_1501;DRB1_0802	0.584857646	0.585751132	0.319007726
orf1ab polyprotein	5689	5713	ETTADIVVFDEISMATNYDLSVVNA	DRB1_0901;DRB1_1301;DRB1_1501;DRB1_0301	0.497132643	0.57045084	0.45016292
orf1ab polyprotein	5862	5886	GSEYDYVIFTQTTETAHSCNVNRFN	DRB1_0403;DQB1-0201_DQA1-0201;DRB1_0404;DRB4_0103;DQB1-0202_DQA1-0201	0.630910898	0.629934346	0.186518036
orf1ab polyprotein	2934	2958	YDTNVLEGSVAYESLRPDTRYVLMD	DQB1-0602_DQA1-0102;DRB5_0101;DRB1_0302;DRB1_0102;DRB1_1402;DRB1_1001;DQB1-0301_DQA1-0505	0.649742264	0.632540655	0.128633535
orf1a polyprotein	2934	2958	YDTNVLEGSVAYESLRPDTRYVLMD	DQB1-0602_DQA1-0102;DRB5_0101;DRB1_0302;DRB1_0102;DRB1_1402;DRB1_1001;DQB1-0301_DQA1-0505	0.649742264	0.632540655	0.128633535
orf1ab polyprotein	1533	1557	KSVYYTSNPTTFHLDGEVITFDNLK	DRB1_1501;DQB1-0201_DQA1-0501;DRB1_0302;DRB1_0301	0.550036331	0.60211696	0.341326736
orf1a polyprotein	1533	1557	KSVYYTSNPTTFHLDGEVITFDNLK	DRB1_1501;DQB1-0201_DQA1-0501;DRB1_0302;DRB1_0301	0.550036331	0.60211696	0.341326736
orf1ab polyprotein	6634	6658	VDGVVQQLPETYFTQSRNLQEFKPR	DQB1-0201_DQA1-0501;DRB1_0901;DRB1_1101;DRB1_0411;DRB1_1303;DRB1_1201;DRB1_1302;DRB1_0803;DRB1_0405	0.481122549	0.435084085	0.604439709
surface glycoprotein	1169	1193	ISGINASVVNIQKEIDRLNEVAKNL	DPB1-1401_DPA1-0201;DQB1-0602_DQA1-0102;DQB1-0502_DQA1-0102;DQB1-0302_DQA1-0301;DQB1-0301_DQA1-0303;DRB1_1303;DRB1_0803	0.55885853	0.552377145	0.401630423
orf1ab polyprotein	5163	5187	ASQGLVASIKNFKSVLYYQNNVFMS	DRB1_1503;DRB1_0410;DRB1_1301;DRB1_1502;DRB1_0404;DRB5_0202;DRB1_1202;DRB1_0406;DRB1_1201;DRB1_0402;DRB1_1501	0.483167828	0.494761853	0.538578682
orf1ab polyprotein	5164	5188	SQGLVASIKNFKSVLYYQNNVFMSE	DRB1_1503;DRB1_0410;DRB1_1301;DRB1_1502;DRB1_0404;DRB5_0202;DRB1_1202;DRB1_0406;DRB1_1201;DRB1_0402;DRB1_1501	0.483167828	0.494761853	0.538578682
orf1ab polyprotein	5144	5168	HFSMMILSDDAVVCFNSTYASQGLV	DRB1_1503;DRB1_1102;DRB1_0301;DRB1_0404;DRB5_0202;DQB1-0303_DQA1-0301;DRB1_0402;DRB1_1501	0.510017882	0.555852235	0.468372185
orf1ab polyprotein	5145	5169	FSMMILSDDAVVCFNSTYASQGLVA	DRB1_1503;DRB1_1102;DRB1_0301;DRB1_0404;DRB5_0202;DQB1-0303_DQA1-0301;DRB1_0402;DRB1_1501	0.510017882	0.555852235	0.468372185
orf1ab polyprotein	5462	5486	LKATEETFKLSYGIATVREVLSDRE	DRB1_0901;DQB1-0201_DQA1-0201;DRB3_0202;DQB1-0301_DQA1-0505;DQB1-0202_DQA1-0201	0.604473319	0.59661634	0.28260257
orf1ab polyprotein	5463	5487	KATEETFKLSYGIATVREVLSDREL	DRB1_0901;DQB1-0201_DQA1-0201;DRB3_0202;DQB1-0301_DQA1-0505;DQB1-0202_DQA1-0201	0.604473319	0.59661634	0.28260257
orf1ab polyprotein	5464	5488	ATEETFKLSYGIATVREVLSDRELH	DRB1_0901;DQB1-0201_DQA1-0201;DRB3_0202;DQB1-0301_DQA1-0505;DQB1-0202_DQA1-0201	0.604473319	0.59661634	0.28260257
orf1ab polyprotein	5461	5485	TLKATEETFKLSYGIATVREVLSDR	DRB1_0901;DQB1-0201_DQA1-0201;DRB3_0202;DQB1-0301_DQA1-0505;DQB1-0202_DQA1-0201	0.604473319	0.59661634	0.28260257
orf1ab polyprotein	5165	5189	QGLVASIKNFKSVLYYQNNVFMSEA	DRB1_1503;DRB1_1301;DRB1_1502;DRB1_0404;DRB5_0202;DRB1_1202;DRB1_0406;DRB1_1201;DRB1_0402;DRB1_1501	0.481516376	0.494761853	0.538578682
ORF8 protein	83	107	CLPFTINCQEPKLGSLVVRCSFYED	DQB1-0602_DQA1-0102;DRB1_0302;DQB1-0303_DQA1-0201;DRB4_0103	0.657869121	0.650874362	0.070704
ORF8 protein	82	106	SCLPFTINCQEPKLGSLVVRCSFYE	DQB1-0602_DQA1-0102;DRB1_0302;DQB1-0303_DQA1-0201;DRB4_0103	0.657869121	0.650874362	0.070704
orf1ab polyprotein	3806	3830	LTLGVYDYLVSTQEFRYMNSQGLLP	DRB1_1602;DRB1_0401;DRB1_1601;DRB1_0407;DRB1_0405;DRB1_0701;DRB1_1001;DQB1-0202_DQA1-0201	0.553873179	0.576388732	0.362158178
orf1a polyprotein	3806	3830	LTLGVYDYLVSTQEFRYMNSQGLLP	DRB1_1602;DRB1_0401;DRB1_1601;DRB1_0407;DRB1_0405;DRB1_0701;DRB1_1001;DQB1-0202_DQA1-0201	0.553873179	0.576388732	0.362158178
ORF3a protein	50	74	VALLAVFQSASKIITLKKRWQLALS	DRB1_1102;DPB1-1401_DPA1-0201;DRB1_1301;DPB1-0501_DPA1-0202;DRB5_0202;DRB1_1202;DRB1_1303;DRB1_1401;DRB1_0804;DRB1_1404;DRB1_1104;DRB1_0802;DRB1_0801	0.375629988	0.349154241	0.736427751
orf1ab polyprotein	4241	4265	MVLGSLAATVRLQAGNATEVPANST	DRB1_1102;DRB1_1301;DRB1_1101;DRB1_1405;DRB4_0103;DRB1_1104	0.62408056	0.627901952	0.18816296
orf1ab polyprotein	4242	4266	VLGSLAATVRLQAGNATEVPANSTV	DRB1_1102;DRB1_1301;DRB1_1101;DRB1_1405;DRB4_0103;DRB1_1104	0.62408056	0.627901952	0.18816296
orf1a polyprotein	4242	4266	VLGSLAATVRLQAGNATEVPANSTV	DRB1_1102;DRB1_1301;DRB1_1101;DRB1_1405;DRB4_0103;DRB1_1104	0.62408056	0.627901952	0.18816296
orf1a polyprotein	4241	4265	MVLGSLAATVRLQAGNATEVPANST	DRB1_1102;DRB1_1301;DRB1_1101;DRB1_1405;DRB4_0103;DRB1_1104	0.62408056	0.627901952	0.18816296
orf1a polyprotein	3684	3708	MYASAVVLLILMTARTVYDDGARRV	DQB1-0401_DQA1-0301;DQB1-0302_DQA1-0301;DQB1-0201_DQA1-0201;DRB1_0411;DRB1_0102;DRB1_0101;DQB1-0603_DQA1-0103;DQB1-0202_DQA1-0201	0.56463381	0.577412615	0.34403353
orf1ab polyprotein	3683	3707	VMYASAVVLLILMTARTVYDDGARR	DQB1-0401_DQA1-0301;DQB1-0302_DQA1-0301;DQB1-0201_DQA1-0201;DRB1_0411;DRB1_0102;DRB1_0101;DQB1-0603_DQA1-0103;DQB1-0202_DQA1-0201	0.56463381	0.577412615	0.34403353
orf1a polyprotein	3683	3707	VMYASAVVLLILMTARTVYDDGARR	DQB1-0401_DQA1-0301;DQB1-0302_DQA1-0301;DQB1-0201_DQA1-0201;DRB1_0411;DRB1_0102;DRB1_0101;DQB1-0603_DQA1-0103;DQB1-0202_DQA1-0201	0.56463381	0.577412615	0.34403353
orf1ab polyprotein	3685	3709	YASAVVLLILMTARTVYDDGARRVW	DQB1-0401_DQA1-0301;DQB1-0302_DQA1-0301;DQB1-0201_DQA1-0201;DRB1_0411;DRB1_0102;DRB1_0101;DQB1-0603_DQA1-0103;DQB1-0202_DQA1-0201	0.56463381	0.577412615	0.34403353
orf1a polyprotein	3685	3709	YASAVVLLILMTARTVYDDGARRVW	DQB1-0401_DQA1-0301;DQB1-0302_DQA1-0301;DQB1-0201_DQA1-0201;DRB1_0411;DRB1_0102;DRB1_0101;DQB1-0603_DQA1-0103;DQB1-0202_DQA1-0201	0.56463381	0.577412615	0.34403353
orf1ab polyprotein	3684	3708	MYASAVVLLILMTARTVYDDGARRV	DQB1-0401_DQA1-0301;DQB1-0302_DQA1-0301;DQB1-0201_DQA1-0201;DRB1_0411;DRB1_0102;DRB1_0101;DQB1-0603_DQA1-0103;DQB1-0202_DQA1-0201	0.56463381	0.577412615	0.34403353
surface glycoprotein	964	988	KQLSSNFGAISSVLNDILSRLDKVE	DQB1-0201_DQA1-0501;DRB1_0302;DRB1_1501;DRB1_1001;DQB1-0202_DQA1-0201	0.577121307	0.595769286	0.306512115
surface glycoprotein	962	986	LVKQLSSNFGAISSVLNDILSRLDK	DQB1-0201_DQA1-0501;DRB1_0302;DRB1_1501;DRB1_1001;DQB1-0202_DQA1-0201	0.577121307	0.595769286	0.306512115
surface glycoprotein	963	987	VKQLSSNFGAISSVLNDILSRLDKV	DQB1-0201_DQA1-0501;DRB1_0302;DRB1_1501;DRB1_1001;DQB1-0202_DQA1-0201	0.577121307	0.595769286	0.306512115
surface glycoprotein	965	989	QLSSNFGAISSVLNDILSRLDKVEA	DQB1-0201_DQA1-0501;DRB1_0302;DRB1_1501;DRB1_1001;DQB1-0202_DQA1-0201	0.577121307	0.595769286	0.306512115
orf1a polyprotein	1334	1358	LNGYTVEEAKTVLKKCKSAFYILPS	DPB1-1001_DPA1-0201;DQB1-0201_DQA1-0501;DRB1_1301;DRB1_1202;DRB1_1201;DPB1-0901_DPA1-0201;DRB1_1404;DRB1_0101	0.480694907	0.503602582	0.527103755
orf1ab polyprotein	1334	1358	LNGYTVEEAKTVLKKCKSAFYILPS	DPB1-1001_DPA1-0201;DQB1-0201_DQA1-0501;DRB1_1301;DRB1_1202;DRB1_1201;DPB1-0901_DPA1-0201;DRB1_1404;DRB1_0101	0.480694907	0.503602582	0.527103755
surface glycoprotein	738	762	CTMYICGDSTECSNLLLQYGSFCTQ	DRB1_1501;DQB1-0201_DQA1-0501;DRB1_0101;DRB1_1502	0.508917787	0.568594923	0.42163975
orf1a polyprotein	1560	1584	LSLREVRTIKVFTTVDNINLHTQVV	DRB1_1602;DQB1-0602_DQA1-0102;DQB1-0303_DQA1-0201;DRB1_0404;DRB1_1601;DRB5_0202;DRB1_0402;DQB1-0603_DQA1-0103;DQB1-0202_DQA1-0201	0.643966208	0.642743955	0.130162634
orf1ab polyprotein	1560	1584	LSLREVRTIKVFTTVDNINLHTQVV	DRB1_1602;DQB1-0602_DQA1-0102;DQB1-0303_DQA1-0201;DRB1_0404;DRB1_1601;DRB5_0202;DRB1_0402;DQB1-0603_DQA1-0103;DQB1-0202_DQA1-0201	0.643966208	0.642743955	0.130162634
nucleocapsid phosphoprotein	347	371	KDQVILLNKHIDAYKTFPPTEPKKD	DRB1_1102;DQB1-0602_DQA1-0102;DRB1_1502;DRB3_0202;DRB1_1303;DRB3_0201;DRB1_0803;DRB3_0301;DRB1_1406;DRB1_0801	0.592963543	0.577772929	0.313108197
orf1a polyprotein	3966	3990	QAVANGDSEVVLKKLKKSLNVAKSE	DRB1_1102;DRB1_1301;DQB1-0201_DQA1-0201;DRB1_1302;DQB1-0303_DQA1-0301;DRB1_1104;DPB1-0201_DPA1-0103	0.421922763	0.427242633	0.638585788
orf1ab polyprotein	3966	3990	QAVANGDSEVVLKKLKKSLNVAKSE	DRB1_1102;DRB1_1301;DQB1-0201_DQA1-0201;DRB1_1302;DQB1-0303_DQA1-0301;DRB1_1104;DPB1-0201_DPA1-0103	0.421922763	0.427242633	0.638585788
orf1ab polyprotein	1635	1659	YHTTDPSFLGRYMSALNHTKKWKYP	DPB1-0202_DPA1-0103;DRB1_0901;DRB5_0102;DRB5_0101;DPB1-1101_DPA1-0201;DPB1-0201_DPA1-0103	0.526191805	0.516779795	0.473305052
orf1ab polyprotein	1634	1658	YYHTTDPSFLGRYMSALNHTKKWKY	DPB1-0202_DPA1-0103;DRB1_0901;DRB5_0102;DRB5_0101;DPB1-1101_DPA1-0201;DPB1-0201_DPA1-0103	0.526191805	0.516779795	0.473305052
orf1a polyprotein	1635	1659	YHTTDPSFLGRYMSALNHTKKWKYP	DPB1-0202_DPA1-0103;DRB1_0901;DRB5_0102;DRB5_0101;DPB1-1101_DPA1-0201;DPB1-0201_DPA1-0103	0.526191805	0.516779795	0.473305052
orf1a polyprotein	1634	1658	YYHTTDPSFLGRYMSALNHTKKWKY	DPB1-0202_DPA1-0103;DRB1_0901;DRB5_0102;DRB5_0101;DPB1-1101_DPA1-0201;DPB1-0201_DPA1-0103	0.526191805	0.516779795	0.473305052
orf1ab polyprotein	1630	1654	EAFEYYHTTDPSFLGRYMSALNHTK	DQB1-0303_DQA1-0201;DRB1_1502;DPB1-0202_DPA1-0103;DRB1_0901;DPB1-0201_DPA1-0103;DQB1-0202_DQA1-0201	0.48441958	0.468511126	0.563889697
orf1a polyprotein	1630	1654	EAFEYYHTTDPSFLGRYMSALNHTK	DQB1-0303_DQA1-0201;DRB1_1502;DPB1-0202_DPA1-0103;DRB1_0901;DPB1-0201_DPA1-0103;DQB1-0202_DQA1-0201	0.48441958	0.468511126	0.563889697
orf1ab polyprotein	5038	5062	CSLSHRFYRLANECAQVLSEMVMCG	DRB1_1602;DRB1_0401;DQB1-0302_DQA1-0301;DRB1_1601;DPB1-1701_DPA1-0201;DPB1-0301_DPA1-0103;DRB1_0102;DRB1_0101;DPB1-0601_DPA1-0103	0.576759209	0.618165271	0.248519763
orf1ab polyprotein	5037	5061	CCSLSHRFYRLANECAQVLSEMVMC	DRB1_1602;DRB1_0401;DQB1-0302_DQA1-0301;DRB1_1601;DPB1-1701_DPA1-0201;DPB1-0301_DPA1-0103;DRB1_0102;DRB1_0101;DPB1-0601_DPA1-0103	0.576759209	0.618165271	0.248519763
orf1ab polyprotein	5036	5060	TCCSLSHRFYRLANECAQVLSEMVM	DRB1_1602;DRB1_0401;DQB1-0302_DQA1-0301;DRB1_1601;DPB1-1701_DPA1-0201;DPB1-0301_DPA1-0103;DRB1_0102;DRB1_0101;DPB1-0601_DPA1-0103	0.576759209	0.618165271	0.248519763
orf1a polyprotein	2508	2532	AGQKTYERHSLSHFVNLDNLRANNT	DRB1_1602;DQB1-0502_DQA1-0102;DRB1_0401;DRB1_0403;DRB1_0404;DRB1_0407;DRB1_1101;DRB1_0405;DRB1_0101;DRB1_0802	0.499290372	0.516028725	0.486951356
orf1ab polyprotein	2508	2532	AGQKTYERHSLSHFVNLDNLRANNT	DRB1_1602;DQB1-0502_DQA1-0102;DRB1_0401;DRB1_0403;DRB1_0404;DRB1_0407;DRB1_1101;DRB1_0405;DRB1_0101;DRB1_0802	0.499290372	0.516028725	0.486951356
orf1ab polyprotein	5968	5992	PGIPKDMTYRRLISMMGFKMNYQVN	DRB1_1602;DRB1_0401;DRB1_1601;DRB1_0407;DRB1_1101;DRB5_0102;DRB1_0803;DRB1_0102;DRB1_0405;DRB1_0804;DRB1_0101;DRB1_1001;DRB1_0802	0.522755053	0.516523506	0.456831
orf1ab polyprotein	5969	5993	GIPKDMTYRRLISMMGFKMNYQVNG	DRB1_1602;DRB1_0401;DRB1_1601;DRB1_0407;DRB1_1101;DRB5_0102;DRB1_0803;DRB1_0102;DRB1_0405;DRB1_0804;DRB1_0101;DRB1_1001;DRB1_0802	0.522755053	0.516523506	0.456831
orf1a polyprotein	2145	2169	FLNKVVSTTTNIVTRCLNRVCTNYM	DPB1-0202_DPA1-0103;DRB1_0406;DPB1-0402_DPA1-0103;DPB1-0901_DPA1-0201;DPB1-0201_DPA1-0103	0.43137304	0.429384278	0.62172816
orf1ab polyprotein	2145	2169	FLNKVVSTTTNIVTRCLNRVCTNYM	DPB1-0202_DPA1-0103;DRB1_0406;DPB1-0402_DPA1-0103;DPB1-0901_DPA1-0201;DPB1-0201_DPA1-0103	0.43137304	0.429384278	0.62172816
orf1ab polyprotein	2146	2170	LNKVVSTTTNIVTRCLNRVCTNYMP	DPB1-0202_DPA1-0103;DRB1_0406;DPB1-0402_DPA1-0103;DPB1-0901_DPA1-0201;DPB1-0201_DPA1-0103	0.43137304	0.429384278	0.62172816
orf1a polyprotein	2146	2170	LNKVVSTTTNIVTRCLNRVCTNYMP	DPB1-0202_DPA1-0103;DRB1_0406;DPB1-0402_DPA1-0103;DPB1-0901_DPA1-0201;DPB1-0201_DPA1-0103	0.43137304	0.429384278	0.62172816
surface glycoprotein	961	985	TLVKQLSSNFGAISSVLNDILSRLD	DRB1_1501;DQB1-0201_DQA1-0501;DRB1_1001;DQB1-0202_DQA1-0201	0.567179428	0.595712032	0.306512115
surface glycoprotein	960	984	NTLVKQLSSNFGAISSVLNDILSRL	DRB1_1501;DQB1-0201_DQA1-0501;DRB1_1001;DQB1-0202_DQA1-0201	0.567179428	0.595712032	0.306512115
ORF3a protein	23	47	ATPSDFVRATATIPIQASLPFGWLI	DQB1-0201_DQA1-0501;DQB1-0303_DQA1-0201;DQB1-0602_DQA1-0102;DRB1_0901;DRB1_1404;DRB1_1001	0.554922608	0.540943746	0.419282846
orf1ab polyprotein	5443	5467	DYILANTCTERLKLFAAETLKATEE	DRB1_1503;DRB1_0403;DRB1_0407;DRB5_0202;DQB1-0501_DQA1-0101;DRB1_1501;DQB1-0202_DQA1-0201	0.589167575	0.59269541	0.270235103
orf1ab polyprotein	5444	5468	YILANTCTERLKLFAAETLKATEET	DRB1_1503;DRB1_0403;DRB1_0407;DRB5_0202;DQB1-0501_DQA1-0101;DRB1_1501;DQB1-0202_DQA1-0201	0.589167575	0.59269541	0.270235103
surface glycoprotein	1168	1192	DISGINASVVNIQKEIDRLNEVAKN	DQB1-0602_DQA1-0102;DQB1-0502_DQA1-0102;DQB1-0302_DQA1-0301;DQB1-0301_DQA1-0303;DRB1_1303;DRB1_0803	0.548434036	0.541799491	0.401630423
surface glycoprotein	1167	1191	GDISGINASVVNIQKEIDRLNEVAK	DQB1-0602_DQA1-0102;DQB1-0502_DQA1-0102;DQB1-0302_DQA1-0301;DQB1-0301_DQA1-0303;DRB1_1303;DRB1_0803	0.548434036	0.541799491	0.401630423
orf1a polyprotein	3287	3311	TTTLNGLWLDDVVYCPRHVICTSED	DPB1-1001_DPA1-0201;DQB1-0401_DQA1-0301;DRB1_1102;DRB1_1301;DRB1_0301;DPB1-1701_DPA1-0201;DRB1_1405;DRB1_1302;DRB1_0406;DRB1_1401;DPB1-0901_DPA1-0201;DRB1_1404;DRB1_1406	0.472566095	0.491617712	0.531736926
orf1ab polyprotein	3287	3311	TTTLNGLWLDDVVYCPRHVICTSED	DPB1-1001_DPA1-0201;DQB1-0401_DQA1-0301;DRB1_1102;DRB1_1301;DRB1_0301;DPB1-1701_DPA1-0201;DRB1_1405;DRB1_1302;DRB1_0406;DRB1_1401;DPB1-0901_DPA1-0201;DRB1_1404;DRB1_1406	0.472566095	0.491617712	0.531736926
orf1a polyprotein	860	884	YTVELGTEVNEFACVVADAVIKTLQ	DQB1-0602_DQA1-0102;DPB1-1101_DPA1-0201;DRB1_0701;DRB1_0101;DRB1_1001	0.555333537	0.591723411	0.313571511
orf1ab polyprotein	860	884	YTVELGTEVNEFACVVADAVIKTLQ	DQB1-0602_DQA1-0102;DPB1-1101_DPA1-0201;DRB1_0701;DRB1_0101;DRB1_1001	0.555333537	0.591723411	0.313571511
orf1ab polyprotein	1186	1210	LVSSFLEMKSEKQVEQKIAEIPKEE	DRB1_1602;DRB1_1502;DPB1-1301_DPA1-0201;DRB1_0401;DRB1_1601;DRB1_0407;DRB1_1101;DRB5_0102;DRB1_0405;DRB1_0101;DRB1_1001	0.485794717	0.513872148	0.492335086
orf1a polyprotein	1186	1210	LVSSFLEMKSEKQVEQKIAEIPKEE	DRB1_1602;DRB1_1502;DPB1-1301_DPA1-0201;DRB1_0401;DRB1_1601;DRB1_0407;DRB1_1101;DRB5_0102;DRB1_0405;DRB1_0101;DRB1_1001	0.485794717	0.513872148	0.492335086
orf1ab polyprotein	2020	2044	ETSNSFDVLKSEDAQGMDNLACEDL	DRB1_1502;DRB1_0401;DRB1_1601;DRB1_0403;DRB1_0404;DRB1_0102;DRB1_0101;DRB1_1001;DQB1-0202_DQA1-0201	0.539343986	0.583522629	0.348072944
orf1a polyprotein	2020	2044	ETSNSFDVLKSEDAQGMDNLACEDL	DRB1_1502;DRB1_0401;DRB1_1601;DRB1_0403;DRB1_0404;DRB1_0102;DRB1_0101;DRB1_1001;DQB1-0202_DQA1-0201	0.539343986	0.583522629	0.348072944
orf1a polyprotein	3554	3578	FTPFDVVRQCSGVTFQSAVKRTIKG	DRB1_1202;DRB1_1201;DRB1_0102;DPB1-0402_DPA1-0103;DPB1-0201_DPA1-0103	0.470260738	0.454553009	0.561999238
orf1ab polyprotein	3554	3578	FTPFDVVRQCSGVTFQSAVKRTIKG	DRB1_1202;DRB1_1201;DRB1_0102;DPB1-0402_DPA1-0103;DPB1-0201_DPA1-0103	0.470260738	0.454553009	0.561999238
orf1a polyprotein	3553	3577	EFTPFDVVRQCSGVTFQSAVKRTIK	DRB1_1202;DRB1_1201;DRB1_0102;DPB1-0402_DPA1-0103;DPB1-0201_DPA1-0103	0.470260738	0.454553009	0.561999238
orf1ab polyprotein	3553	3577	EFTPFDVVRQCSGVTFQSAVKRTIK	DRB1_1202;DRB1_1201;DRB1_0102;DPB1-0402_DPA1-0103;DPB1-0201_DPA1-0103	0.470260738	0.454553009	0.561999238
orf1a polyprotein	1678	1702	TALLTLQQIELKFNPPALQDAYYRA	DPB1-1301_DPA1-0201;DRB3_0201;DRB1_0804;DRB1_1501;DRB4_0103	0.611815655	0.633599543	0.172336233
orf1ab polyprotein	1678	1702	TALLTLQQIELKFNPPALQDAYYRA	DPB1-1301_DPA1-0201;DRB3_0201;DRB1_0804;DRB1_1501;DRB4_0103	0.611815655	0.633599543	0.172336233
orf1ab polyprotein	1679	1703	ALLTLQQIELKFNPPALQDAYYRAR	DPB1-1301_DPA1-0201;DRB3_0201;DRB1_0804;DRB1_1501;DRB4_0103	0.611815655	0.633599543	0.172336233
orf1a polyprotein	1675	1699	YLATALLTLQQIELKFNPPALQDAY	DPB1-1301_DPA1-0201;DRB3_0201;DRB1_0804;DRB1_1501;DRB4_0103	0.611815655	0.633599543	0.172336233
orf1ab polyprotein	1676	1700	LATALLTLQQIELKFNPPALQDAYY	DPB1-1301_DPA1-0201;DRB3_0201;DRB1_0804;DRB1_1501;DRB4_0103	0.611815655	0.633599543	0.172336233
orf1ab polyprotein	1673	1697	NCYLATALLTLQQIELKFNPPALQD	DPB1-1301_DPA1-0201;DRB3_0201;DRB1_0804;DRB1_1501;DRB4_0103	0.611815655	0.633599543	0.172336233
orf1a polyprotein	1676	1700	LATALLTLQQIELKFNPPALQDAYY	DPB1-1301_DPA1-0201;DRB3_0201;DRB1_0804;DRB1_1501;DRB4_0103	0.611815655	0.633599543	0.172336233
orf1a polyprotein	1673	1697	NCYLATALLTLQQIELKFNPPALQD	DPB1-1301_DPA1-0201;DRB3_0201;DRB1_0804;DRB1_1501;DRB4_0103	0.611815655	0.633599543	0.172336233
orf1a polyprotein	1674	1698	CYLATALLTLQQIELKFNPPALQDA	DPB1-1301_DPA1-0201;DRB3_0201;DRB1_0804;DRB1_1501;DRB4_0103	0.611815655	0.633599543	0.172336233
orf1ab polyprotein	1677	1701	ATALLTLQQIELKFNPPALQDAYYR	DPB1-1301_DPA1-0201;DRB3_0201;DRB1_0804;DRB1_1501;DRB4_0103	0.611815655	0.633599543	0.172336233
orf1ab polyprotein	1674	1698	CYLATALLTLQQIELKFNPPALQDA	DPB1-1301_DPA1-0201;DRB3_0201;DRB1_0804;DRB1_1501;DRB4_0103	0.611815655	0.633599543	0.172336233
orf1a polyprotein	1679	1703	ALLTLQQIELKFNPPALQDAYYRAR	DPB1-1301_DPA1-0201;DRB3_0201;DRB1_0804;DRB1_1501;DRB4_0103	0.611815655	0.633599543	0.172336233
orf1ab polyprotein	1675	1699	YLATALLTLQQIELKFNPPALQDAY	DPB1-1301_DPA1-0201;DRB3_0201;DRB1_0804;DRB1_1501;DRB4_0103	0.611815655	0.633599543	0.172336233
orf1a polyprotein	1677	1701	ATALLTLQQIELKFNPPALQDAYYR	DPB1-1301_DPA1-0201;DRB3_0201;DRB1_0804;DRB1_1501;DRB4_0103	0.611815655	0.633599543	0.172336233
ORF3a protein	18	42	GEIKDATPSDFVRATATIPIQASLP	DQB1-0201_DQA1-0501;DRB1_0901;DRB1_0701;DRB1_1404;DRB3_0301;DRB1_1001	0.504328541	0.504144161	0.487675369
orf1a polyprotein	728	752	GLLMPLKAPKEIIFLEGETLPTEVL	DPB1-0101_DPA1-0202;DRB1_1601;DRB1_1202;DRB1_1201;DRB1_0102;DRB1_1401;DRB1_0405;DRB1_1501;DRB1_0101	0.470726849	0.51904388	0.498948378
orf1ab polyprotein	727	751	TGLLMPLKAPKEIIFLEGETLPTEV	DPB1-0101_DPA1-0202;DRB1_1601;DRB1_1202;DRB1_1201;DRB1_0102;DRB1_1401;DRB1_0405;DRB1_1501;DRB1_0101	0.470726849	0.51904388	0.498948378
orf1a polyprotein	727	751	TGLLMPLKAPKEIIFLEGETLPTEV	DPB1-0101_DPA1-0202;DRB1_1601;DRB1_1202;DRB1_1201;DRB1_0102;DRB1_1401;DRB1_0405;DRB1_1501;DRB1_0101	0.470726849	0.51904388	0.498948378
orf1ab polyprotein	728	752	GLLMPLKAPKEIIFLEGETLPTEVL	DPB1-0101_DPA1-0202;DRB1_1601;DRB1_1202;DRB1_1201;DRB1_0102;DRB1_1401;DRB1_0405;DRB1_1501;DRB1_0101	0.470726849	0.51904388	0.498948378
orf1a polyprotein	2516	2540	HSLSHFVNLDNLRANNTKGSLPINV	DRB1_1602;DRB1_1102;DRB1_0401;DRB1_0403;DRB1_0404;DRB1_0407;DRB1_1101;DRB1_1601;DRB1_0102;DRB1_0405;DRB1_0101;DRB1_0802	0.540470395	0.544415499	0.397342784
orf1ab polyprotein	2517	2541	SLSHFVNLDNLRANNTKGSLPINVI	DRB1_1602;DRB1_1102;DRB1_0401;DRB1_0403;DRB1_0404;DRB1_0407;DRB1_1101;DRB1_1601;DRB1_0102;DRB1_0405;DRB1_0101;DRB1_0802	0.540470395	0.544415499	0.397342784
orf1a polyprotein	2517	2541	SLSHFVNLDNLRANNTKGSLPINVI	DRB1_1602;DRB1_1102;DRB1_0401;DRB1_0403;DRB1_0404;DRB1_0407;DRB1_1101;DRB1_1601;DRB1_0102;DRB1_0405;DRB1_0101;DRB1_0802	0.540470395	0.544415499	0.397342784
orf1ab polyprotein	2516	2540	HSLSHFVNLDNLRANNTKGSLPINV	DRB1_1602;DRB1_1102;DRB1_0401;DRB1_0403;DRB1_0404;DRB1_0407;DRB1_1101;DRB1_1601;DRB1_0102;DRB1_0405;DRB1_0101;DRB1_0802	0.540470395	0.544415499	0.397342784
orf1a polyprotein	2487	2511	SSYIVDSVTVKNGSIHLYFDKAGQK	DRB1_1503;DRB1_0402;DRB1_1501;DRB3_0101;DQB1-0301_DQA1-0505	0.61007422	0.624210748	0.159917766
orf1ab polyprotein	2487	2511	SSYIVDSVTVKNGSIHLYFDKAGQK	DRB1_1503;DRB1_0402;DRB1_1501;DRB3_0101;DQB1-0301_DQA1-0505	0.61007422	0.624210748	0.159917766
orf1ab polyprotein	6636	6660	GVVQQLPETYFTQSRNLQEFKPRSQ	DQB1-0201_DQA1-0501;DQB1-0401_DQA1-0301;DRB1_0901;DRB1_1101;DRB1_0411;DRB1_1303;DRB1_1302;DRB1_0803;DRB1_0405	0.457751983	0.415758383	0.605731744
orf1ab polyprotein	6641	6665	LPETYFTQSRNLQEFKPRSQMEIDF	DQB1-0201_DQA1-0501;DQB1-0401_DQA1-0301;DRB1_0901;DRB1_1101;DRB1_0411;DRB1_1303;DRB1_1302;DRB1_0803;DRB1_0405	0.457751983	0.415758383	0.605731744
orf1ab polyprotein	6638	6662	VQQLPETYFTQSRNLQEFKPRSQME	DQB1-0201_DQA1-0501;DQB1-0401_DQA1-0301;DRB1_0901;DRB1_1101;DRB1_0411;DRB1_1303;DRB1_1302;DRB1_0803;DRB1_0405	0.457751983	0.415758383	0.605731744
orf1ab polyprotein	6639	6663	QQLPETYFTQSRNLQEFKPRSQMEI	DQB1-0201_DQA1-0501;DQB1-0401_DQA1-0301;DRB1_0901;DRB1_1101;DRB1_0411;DRB1_1303;DRB1_1302;DRB1_0803;DRB1_0405	0.457751983	0.415758383	0.605731744
orf1ab polyprotein	6637	6661	VVQQLPETYFTQSRNLQEFKPRSQM	DQB1-0201_DQA1-0501;DQB1-0401_DQA1-0301;DRB1_0901;DRB1_1101;DRB1_0411;DRB1_1303;DRB1_1302;DRB1_0803;DRB1_0405	0.457751983	0.415758383	0.605731744
orf1ab polyprotein	6640	6664	QLPETYFTQSRNLQEFKPRSQMEID	DQB1-0201_DQA1-0501;DQB1-0401_DQA1-0301;DRB1_0901;DRB1_1101;DRB1_0411;DRB1_1303;DRB1_1302;DRB1_0803;DRB1_0405	0.457751983	0.415758383	0.605731744
orf1ab polyprotein	5227	5251	SRILGAGCFVDDIVKTDGTLMIERF	DQB1-0501_DQA1-0101;DRB1_1405;DRB1_0701;DRB1_1404;DRB3_0301;DQB1-0202_DQA1-0201	0.579353294	0.591132625	0.277199749
orf1ab polyprotein	5228	5252	RILGAGCFVDDIVKTDGTLMIERFV	DQB1-0501_DQA1-0101;DRB1_1405;DRB1_0701;DRB1_1404;DRB3_0301;DQB1-0202_DQA1-0201	0.579353294	0.591132625	0.277199749
orf1ab polyprotein	5226	5250	PSRILGAGCFVDDIVKTDGTLMIER	DPB1-0101_DPA1-0103;DQB1-0501_DQA1-0101;DRB1_1405;DRB1_0701;DRB1_1404;DRB3_0301;DQB1-0202_DQA1-0201	0.579353294	0.591132625	0.277199749
orf1a polyprotein	4055	4079	GCVPLNIIPLTTAAKLMVVIPDYNT	DPB1-1401_DPA1-0201;DPB1-0101_DPA1-0201;DQB1-0602_DQA1-0102;DRB1_0404;DQB1-0601_DQA1-0103;DRB5_0101;DRB1_1401	0.593894196	0.598134685	0.230893153
orf1ab polyprotein	4055	4079	GCVPLNIIPLTTAAKLMVVIPDYNT	DPB1-1401_DPA1-0201;DPB1-0101_DPA1-0201;DQB1-0602_DQA1-0102;DRB1_0404;DQB1-0601_DQA1-0103;DRB5_0101;DRB1_1401	0.593894196	0.598134685	0.230893153
ORF6 protein	27	51	WNLDYIINLIIKNLSKSLTENKYSQ	DQB1-0302_DQA1-0301;DRB3_0202;DRB1_1101;DRB3_0301;DRB3_0201;DRB1_0302;DRB1_1402;DRB1_0804;DRB1_1104;DRB1_0802;DRB1_1406	0.607340159	0.574333301	0.258064635
ORF6 protein	23	47	KVSIWNLDYIINLIIKNLSKSLTEN	DQB1-0302_DQA1-0301;DRB3_0202;DRB1_1101;DRB3_0301;DRB3_0201;DRB1_0302;DRB1_1402;DRB1_0804;DRB1_1104;DRB1_0802;DRB1_1406	0.607340159	0.574333301	0.258064635
ORF6 protein	25	49	SIWNLDYIINLIIKNLSKSLTENKY	DQB1-0302_DQA1-0301;DRB3_0202;DRB1_1101;DRB3_0301;DRB3_0201;DRB1_0302;DRB1_1402;DRB1_0804;DRB1_1104;DRB1_0802;DRB1_1406	0.607340159	0.574333301	0.258064635
ORF6 protein	26	50	IWNLDYIINLIIKNLSKSLTENKYS	DQB1-0302_DQA1-0301;DRB3_0202;DRB1_1101;DRB3_0301;DRB3_0201;DRB1_0302;DRB1_1402;DRB1_0804;DRB1_1104;DRB1_0802;DRB1_1406	0.607340159	0.574333301	0.258064635
ORF6 protein	24	48	VSIWNLDYIINLIIKNLSKSLTENK	DQB1-0302_DQA1-0301;DRB3_0202;DRB1_1101;DRB3_0301;DRB3_0201;DRB1_0302;DRB1_1402;DRB1_0804;DRB1_1104;DRB1_0802;DRB1_1406	0.607340159	0.574333301	0.258064635
orf1a polyprotein	1339	1363	VEEAKTVLKKCKSAFYILPSIISNE	DPB1-1001_DPA1-0201;DRB1_1301;DRB1_0403;DRB1_1101;DRB1_1202;DQB1-0501_DQA1-0101;DRB1_1201;DRB1_0402;DRB1_1404;DPB1-0901_DPA1-0201	0.462827772	0.451979184	0.569056232
orf1ab polyprotein	1339	1363	VEEAKTVLKKCKSAFYILPSIISNE	DPB1-1001_DPA1-0201;DRB1_1301;DRB1_0403;DRB1_1101;DRB1_1202;DQB1-0501_DQA1-0101;DRB1_1201;DRB1_0402;DRB1_1404;DPB1-0901_DPA1-0201	0.462827772	0.451979184	0.569056232
orf1a polyprotein	865	889	GTEVNEFACVVADAVIKTLQPVSEL	DQB1-0602_DQA1-0102;DRB5_0102;DRB1_0701;DRB1_0101;DRB1_1001	0.551110608	0.58784607	0.313571511
orf1ab polyprotein	865	889	GTEVNEFACVVADAVIKTLQPVSEL	DQB1-0602_DQA1-0102;DRB5_0102;DRB1_0701;DRB1_0101;DRB1_1001	0.551110608	0.58784607	0.313571511
orf1a polyprotein	1632	1656	FEYYHTTDPSFLGRYMSALNHTKKW	DQB1-0303_DQA1-0201;DPB1-0202_DPA1-0103;DRB1_0901;DRB5_0102;DPB1-1101_DPA1-0201;DPB1-0201_DPA1-0103;DQB1-0202_DQA1-0201	0.515533539	0.505909808	0.473305052
orf1ab polyprotein	1632	1656	FEYYHTTDPSFLGRYMSALNHTKKW	DQB1-0303_DQA1-0201;DPB1-0202_DPA1-0103;DRB1_0901;DRB5_0102;DPB1-1101_DPA1-0201;DPB1-0201_DPA1-0103;DQB1-0202_DQA1-0201	0.515533539	0.505909808	0.473305052
orf1ab polyprotein	1840	1864	TSKETLYCIDGALLTKSSEYKGPIT	DRB3_0202;DRB1_1303;DRB1_1405;DRB1_0101;DRB3_0101	0.639066521	0.652511443	0.088433342
orf1a polyprotein	1840	1864	TSKETLYCIDGALLTKSSEYKGPIT	DRB3_0202;DRB1_1303;DRB1_1405;DRB1_0101;DRB3_0101	0.639066521	0.652511443	0.088433342
orf1ab polyprotein	5861	5885	QGSEYDYVIFTQTTETAHSCNVNRF	DRB1_0403;DRB1_0404;DRB1_0406;DRB4_0103;DQB1-0202_DQA1-0201	0.632447673	0.630127478	0.124259644
orf1ab polyprotein	4429	4453	IYNDKVAGFAKFLKTNCCRFQEKDE	DRB1_1301;DPB1-1701_DPA1-0201;DRB3_0201;DRB1_0701;DPB1-0402_DPA1-0103;DPB1-0901_DPA1-0201	0.497239672	0.524063981	0.46231716
orf1ab polyprotein	272	296	NFVFPLNSIIKTIQPRVEKKKLDGF	DQB1-0603_DQA1-0103;DQB1-0303_DQA1-0201;DQB1-0302_DQA1-0301;DQB1-0201_DQA1-0201;DQB1-0301_DQA1-0601;DQB1-0202_DQA1-0201	0.52182775	0.52182775	0.434496
orf1a polyprotein	274	298	VFPLNSIIKTIQPRVEKKKLDGFMG	DQB1-0603_DQA1-0103;DQB1-0303_DQA1-0201;DQB1-0302_DQA1-0301;DQB1-0201_DQA1-0201;DQB1-0301_DQA1-0601;DQB1-0202_DQA1-0201	0.52182775	0.52182775	0.434496
orf1a polyprotein	273	297	FVFPLNSIIKTIQPRVEKKKLDGFM	DQB1-0603_DQA1-0103;DQB1-0303_DQA1-0201;DQB1-0302_DQA1-0301;DQB1-0201_DQA1-0201;DQB1-0301_DQA1-0601;DQB1-0202_DQA1-0201	0.52182775	0.52182775	0.434496
orf1a polyprotein	271	295	PNFVFPLNSIIKTIQPRVEKKKLDG	DQB1-0603_DQA1-0103;DQB1-0303_DQA1-0201;DQB1-0302_DQA1-0301;DQB1-0201_DQA1-0201;DQB1-0301_DQA1-0601;DQB1-0202_DQA1-0201	0.52182775	0.52182775	0.434496
orf1ab polyprotein	275	299	FPLNSIIKTIQPRVEKKKLDGFMGR	DQB1-0603_DQA1-0103;DQB1-0303_DQA1-0201;DQB1-0302_DQA1-0301;DQB1-0201_DQA1-0201;DQB1-0301_DQA1-0601;DQB1-0202_DQA1-0201	0.52182775	0.52182775	0.434496
orf1ab polyprotein	271	295	PNFVFPLNSIIKTIQPRVEKKKLDG	DQB1-0603_DQA1-0103;DQB1-0303_DQA1-0201;DQB1-0302_DQA1-0301;DQB1-0201_DQA1-0201;DQB1-0301_DQA1-0601;DQB1-0202_DQA1-0201	0.52182775	0.52182775	0.434496
orf1ab polyprotein	273	297	FVFPLNSIIKTIQPRVEKKKLDGFM	DQB1-0603_DQA1-0103;DQB1-0303_DQA1-0201;DQB1-0302_DQA1-0301;DQB1-0201_DQA1-0201;DQB1-0301_DQA1-0601;DQB1-0202_DQA1-0201	0.52182775	0.52182775	0.434496
orf1a polyprotein	275	299	FPLNSIIKTIQPRVEKKKLDGFMGR	DQB1-0603_DQA1-0103;DQB1-0303_DQA1-0201;DQB1-0302_DQA1-0301;DQB1-0201_DQA1-0201;DQB1-0301_DQA1-0601;DQB1-0202_DQA1-0201	0.52182775	0.52182775	0.434496
orf1ab polyprotein	274	298	VFPLNSIIKTIQPRVEKKKLDGFMG	DQB1-0603_DQA1-0103;DQB1-0303_DQA1-0201;DQB1-0302_DQA1-0301;DQB1-0201_DQA1-0201;DQB1-0301_DQA1-0601;DQB1-0202_DQA1-0201	0.52182775	0.52182775	0.434496
orf1a polyprotein	272	296	NFVFPLNSIIKTIQPRVEKKKLDGF	DQB1-0603_DQA1-0103;DQB1-0303_DQA1-0201;DQB1-0302_DQA1-0301;DQB1-0201_DQA1-0201;DQB1-0301_DQA1-0601;DQB1-0202_DQA1-0201	0.52182775	0.52182775	0.434496
orf1ab polyprotein	5143	5167	KHFSMMILSDDAVVCFNSTYASQGL	DRB1_1503;DRB1_1102;DRB1_0301;DRB1_0404;DQB1-0303_DQA1-0301;DRB1_0402;DRB1_1501	0.49189057	0.539420604	0.468372185
orf1ab polyprotein	5142	5166	RKHFSMMILSDDAVVCFNSTYASQG	DRB1_1503;DRB1_1102;DRB1_0301;DRB1_0404;DQB1-0303_DQA1-0301;DRB1_0402;DRB1_1501	0.49189057	0.539420604	0.468372185
orf1a polyprotein	1559	1583	LLSLREVRTIKVFTTVDNINLHTQV	DQB1-0602_DQA1-0102;DQB1-0303_DQA1-0201;DRB1_0404;DRB1_1601;DRB5_0202;DRB1_0402;DQB1-0603_DQA1-0103;DQB1-0202_DQA1-0201	0.637989164	0.641780066	0.094726989
orf1ab polyprotein	1559	1583	LLSLREVRTIKVFTTVDNINLHTQV	DQB1-0602_DQA1-0102;DQB1-0303_DQA1-0201;DRB1_0404;DRB1_1601;DRB5_0202;DRB1_0402;DQB1-0603_DQA1-0103;DQB1-0202_DQA1-0201	0.637989164	0.641780066	0.094726989
orf1ab polyprotein	1557	1581	KTLLSLREVRTIKVFTTVDNINLHT	DRB1_1503;DQB1-0602_DQA1-0102;DQB1-0303_DQA1-0201;DRB1_0404;DRB5_0202;DRB1_0402;DQB1-0603_DQA1-0103;DQB1-0202_DQA1-0201	0.645303977	0.633822581	0.09525889
orf1a polyprotein	1557	1581	KTLLSLREVRTIKVFTTVDNINLHT	DRB1_1503;DQB1-0602_DQA1-0102;DQB1-0303_DQA1-0201;DRB1_0404;DRB5_0202;DRB1_0402;DQB1-0603_DQA1-0103;DQB1-0202_DQA1-0201	0.645303977	0.633822581	0.09525889
ORF9b protein	62	86	NSLEDKAFQLTPIAVQMTKLATTEE	DQB1-0602_DQA1-0102;DRB4_0103;DRB1_0402;DRB1_0407;DPB1-0202_DPA1-0103	0.639758307	0.633477694	0.080140157
ORF9b protein	61	85	LNSLEDKAFQLTPIAVQMTKLATTE	DQB1-0602_DQA1-0102;DRB4_0103;DRB1_0402;DRB1_0407;DPB1-0202_DPA1-0103	0.639758307	0.633477694	0.080140157
ORF9b protein	64	88	LEDKAFQLTPIAVQMTKLATTEELP	DRB1_0402;DQB1-0602_DQA1-0102;DRB4_0103;DRB1_0407	0.639758307	0.633477694	0.080140157
ORF9b protein	63	87	SLEDKAFQLTPIAVQMTKLATTEEL	DRB1_0402;DQB1-0602_DQA1-0102;DRB4_0103;DRB1_0407	0.639758307	0.633477694	0.080140157
orf1ab polyprotein	6065	6089	PPPGDQFKHLIPLMYKGLPWNVVRI	DRB5_0102;DRB1_1202;DRB1_1406;DRB5_0101;DRB1_1402;DRB1_0803;DRB1_0101;DQB1-0301_DQA1-0505;DRB1_0802	0.575597308	0.566807514	0.31010364
ORF3a protein	24	48	TPSDFVRATATIPIQASLPFGWLIV	DQB1-0201_DQA1-0501;DQB1-0303_DQA1-0201;DQB1-0602_DQA1-0102;DRB1_0901;DRB1_1001	0.553373177	0.540644888	0.391019542
orf1ab polyprotein	6066	6090	PPGDQFKHLIPLMYKGLPWNVVRIK	DRB1_1202;DRB1_1402;DRB1_0101;DPB1-0201_DPA1-0103;DQB1-0301_DQA1-0505;DRB1_1406	0.496107847	0.504730085	0.476618824
surface glycoprotein	755	779	QYGSFCTQLNRALTGIAVEQDKNTQ	DPB1-0101_DPA1-0202;DRB1_1602;DQB1-0602_DQA1-0102;DQB1-0502_DQA1-0102;DRB1_1502;DPB1-0101_DPA1-0103;DQB1-0302_DQA1-0301;DQB1-0604_DQA1-0102	0.516741233	0.497815464	0.46112397
surface glycoprotein	757	781	GSFCTQLNRALTGIAVEQDKNTQEV	DPB1-0101_DPA1-0202;DRB1_1602;DQB1-0602_DQA1-0102;DQB1-0502_DQA1-0102;DRB1_1502;DPB1-0101_DPA1-0103;DQB1-0302_DQA1-0301;DQB1-0604_DQA1-0102	0.516741233	0.497815464	0.46112397
surface glycoprotein	756	780	YGSFCTQLNRALTGIAVEQDKNTQE	DPB1-0101_DPA1-0202;DRB1_1602;DQB1-0602_DQA1-0102;DQB1-0502_DQA1-0102;DRB1_1502;DPB1-0101_DPA1-0103;DQB1-0302_DQA1-0301;DQB1-0604_DQA1-0102	0.516741233	0.497815464	0.46112397
orf1ab polyprotein	5863	5887	SEYDYVIFTQTTETAHSCNVNRFNV	DRB1_0404;DQB1-0201_DQA1-0201;DRB4_0103;DQB1-0202_DQA1-0201	0.623497555	0.625501719	0.126773575
orf1ab polyprotein	5864	5888	EYDYVIFTQTTETAHSCNVNRFNVA	DRB1_0404;DQB1-0201_DQA1-0201;DRB4_0103;DQB1-0202_DQA1-0201	0.623497555	0.625501719	0.126773575
orf1ab polyprotein	5865	5889	YDYVIFTQTTETAHSCNVNRFNVAI	DRB1_0404;DQB1-0201_DQA1-0201;DRB4_0103;DQB1-0202_DQA1-0201	0.623497555	0.625501719	0.126773575
envelope protein	7	31	EETGTLIVNSVLLFLAFVVFLLVTL	DQB1-0602_DQA1-0102;DRB1_0301;DRB3_0202;DRB3_0201;DRB1_0302	0.601009158	0.612372447	0.167883352
membrane glycoprotein	156	180	LGRCDIKDLPKEITVATSRTLSYYK	DRB1_1503;DRB1_0403;DRB1_0404;DRB1_0901;DRB1_0406;DRB1_0102;DRB1_1501;DQB1-0202_DQA1-0201	0.519083072	0.517124386	0.431544318
orf1a polyprotein	1321	1345	PTDNYITTYPGQGLNGYTVEEAKTV	DRB1_1503;DQB1-0401_DQA1-0301;DQB1-0303_DQA1-0201;DQB1-0502_DQA1-0102;DRB5_0202;DQB1-0501_DQA1-0101;DQB1-0402_DQA1-0401;DRB1_1501;DRB1_0802	0.523251391	0.525481664	0.408129751
orf1ab polyprotein	1321	1345	PTDNYITTYPGQGLNGYTVEEAKTV	DRB1_1503;DQB1-0401_DQA1-0301;DQB1-0303_DQA1-0201;DQB1-0502_DQA1-0102;DRB5_0202;DQB1-0501_DQA1-0101;DQB1-0402_DQA1-0401;DRB1_1501;DRB1_0802	0.523251391	0.525481664	0.408129751
orf1ab polyprotein	6441	6465	TYNLWNTFTRLQSLENVAFNVVNKG	DQB1-0602_DQA1-0102;DRB1_1601;DRB5_0102;DRB1_1101;DRB1_1202;DRB1_1201;DRB1_0101;DRB1_1001	0.513207145	0.525276107	0.424364356
ORF3a protein	17	41	QGEIKDATPSDFVRATATIPIQASL	DQB1-0201_DQA1-0501;DRB1_0901;DRB1_0701;DRB3_0301;DRB1_1001	0.502352198	0.503768775	0.460031455
orf1ab polyprotein	5224	5248	PDPSRILGAGCFVDDIVKTDGTLMI	DPB1-0101_DPA1-0201;DPB1-0101_DPA1-0103;DQB1-0501_DQA1-0101;DRB1_0701;DRB1_1404;DQB1-0301_DQA1-0505	0.577374905	0.590368635	0.248119242
orf1ab polyprotein	5223	5247	YPDPSRILGAGCFVDDIVKTDGTLM	DPB1-0101_DPA1-0201;DPB1-0101_DPA1-0103;DQB1-0501_DQA1-0101;DRB1_0701;DRB1_1404;DQB1-0301_DQA1-0505	0.577374905	0.590368635	0.248119242
nucleocapsid phosphoprotein	343	367	DPNFKDQVILLNKHIDAYKTFPPTE	DRB1_1102;DQB1-0602_DQA1-0102;DRB3_0202;DRB3_0301;DRB1_1303;DRB3_0201;DRB1_0803;DRB1_1104;DRB1_1406;DRB1_0801	0.603873928	0.59883141	0.189114734
nucleocapsid phosphoprotein	342	366	KDPNFKDQVILLNKHIDAYKTFPPT	DRB1_1102;DQB1-0602_DQA1-0102;DRB3_0202;DRB3_0301;DRB1_1303;DRB3_0201;DRB1_0803;DRB1_1104;DRB1_1406;DRB1_0801	0.603873928	0.59883141	0.189114734
orf1a polyprotein	3010	3034	YYRSLPGVFCGVDAVNLLTNMFTPL	DQB1-0201_DQA1-0501;DRB1_1602;DRB5_0102;DRB1_0701;DRB1_0101	0.534287297	0.569315875	0.335281344
orf1ab polyprotein	3012	3036	RSLPGVFCGVDAVNLLTNMFTPLIQ	DQB1-0201_DQA1-0501;DRB1_1602;DRB5_0102;DRB1_0701;DRB1_0101	0.534287297	0.569315875	0.335281344
orf1ab polyprotein	3010	3034	YYRSLPGVFCGVDAVNLLTNMFTPL	DQB1-0201_DQA1-0501;DRB1_1602;DRB5_0102;DRB1_0701;DRB1_0101	0.534287297	0.569315875	0.335281344
orf1ab polyprotein	3007	3031	NNDYYRSLPGVFCGVDAVNLLTNMF	DQB1-0201_DQA1-0501;DRB1_1602;DRB5_0102;DRB1_0701;DRB1_0101	0.534287297	0.569315875	0.335281344
orf1ab polyprotein	3011	3035	YRSLPGVFCGVDAVNLLTNMFTPLI	DQB1-0201_DQA1-0501;DRB1_1602;DRB5_0102;DRB1_0701;DRB1_0101	0.534287297	0.569315875	0.335281344
orf1ab polyprotein	3008	3032	NDYYRSLPGVFCGVDAVNLLTNMFT	DQB1-0201_DQA1-0501;DRB1_1602;DRB5_0102;DRB1_0701;DRB1_0101	0.534287297	0.569315875	0.335281344
orf1a polyprotein	3009	3033	DYYRSLPGVFCGVDAVNLLTNMFTP	DQB1-0201_DQA1-0501;DRB1_1602;DRB5_0102;DRB1_0701;DRB1_0101	0.534287297	0.569315875	0.335281344
orf1a polyprotein	3008	3032	NDYYRSLPGVFCGVDAVNLLTNMFT	DQB1-0201_DQA1-0501;DRB1_1602;DRB5_0102;DRB1_0701;DRB1_0101	0.534287297	0.569315875	0.335281344
orf1a polyprotein	3007	3031	NNDYYRSLPGVFCGVDAVNLLTNMF	DQB1-0201_DQA1-0501;DRB1_1602;DRB5_0102;DRB1_0701;DRB1_0101	0.534287297	0.569315875	0.335281344
orf1a polyprotein	3012	3036	RSLPGVFCGVDAVNLLTNMFTPLIQ	DQB1-0201_DQA1-0501;DRB1_1602;DRB5_0102;DRB1_0701;DRB1_0101	0.534287297	0.569315875	0.335281344
orf1a polyprotein	3011	3035	YRSLPGVFCGVDAVNLLTNMFTPLI	DQB1-0201_DQA1-0501;DRB1_1602;DRB5_0102;DRB1_0701;DRB1_0101	0.534287297	0.569315875	0.335281344
orf1ab polyprotein	3009	3033	DYYRSLPGVFCGVDAVNLLTNMFTP	DQB1-0201_DQA1-0501;DRB1_1602;DRB5_0102;DRB1_0701;DRB1_0101	0.534287297	0.569315875	0.335281344
orf1ab polyprotein	532	556	PLYAFASEAARVVRSIFSRTLETAQ	DQB1-0201_DQA1-0201;DQB1-0202_DQA1-0201;DQB1-0602_DQA1-0102;DPB1-0402_DPA1-0103	0.570561569	0.570561569	0.28849088
orf1a polyprotein	532	556	PLYAFASEAARVVRSIFSRTLETAQ	DQB1-0201_DQA1-0201;DQB1-0202_DQA1-0201;DQB1-0602_DQA1-0102;DPB1-0402_DPA1-0103	0.570561569	0.570561569	0.28849088
orf1a polyprotein	1275	1299	DITFLKKDAPYIVGDVVQEGVLTAV	DPB1-0101_DPA1-0201;DQB1-0602_DQA1-0102;DRB1_0301;DRB1_0401;DRB3_0301	0.572537056	0.623299375	0.183723745
orf1ab polyprotein	1275	1299	DITFLKKDAPYIVGDVVQEGVLTAV	DPB1-0101_DPA1-0201;DQB1-0602_DQA1-0102;DRB1_0301;DRB1_0401;DRB3_0301	0.572537056	0.623299375	0.183723745
orf1ab polyprotein	5537	5561	GTTTYKLNVGDYFVLTSHTVMPLSA	DRB1_1602;DRB1_1502;DRB1_1601;DRB3_0202;DRB1_1101;DRB1_1402;DRB1_0101;DRB1_1001;DRB1_0802	0.537303546	0.525662172	0.397342784
orf1ab polyprotein	5536	5560	RGTTTYKLNVGDYFVLTSHTVMPLS	DRB1_1602;DRB1_1502;DRB1_1601;DRB3_0202;DRB1_1101;DRB1_1402;DRB1_0101;DRB1_1001;DRB1_0802	0.537303546	0.525662172	0.397342784
surface glycoprotein	166	190	CTFEYVSQPFLMDLEGKQGNFKNLR	DPB1-0101_DPA1-0201;DPB1-0101_DPA1-0103;DRB1_0102;DRB3_0101;DPB1-0201_DPA1-0103	0.552699423	0.548372971	0.347501553
orf1ab polyprotein	4623	4647	VPVVDSYYSLLMPILTLTRALTAES	DRB1_1101;DRB1_0701;DRB1_0804;DRB1_1104;DRB1_0101;DRB1_1001;DRB1_0802	0.524901036	0.54705754	0.377873437
orf1ab polyprotein	4624	4648	PVVDSYYSLLMPILTLTRALTAESH	DRB1_1101;DRB1_0701;DRB1_0804;DRB1_1104;DRB1_0101;DRB1_1001;DRB1_0802	0.524901036	0.54705754	0.377873437
orf1ab polyprotein	868	892	VNEFACVVADAVIKTLQPVSELLTP	DQB1-0201_DQA1-0501;DRB1_1503;DQB1-0302_DQA1-0301;DPB1-0901_DPA1-0201;DRB1_0101	0.509928978	0.515041441	0.438760373
orf1a polyprotein	868	892	VNEFACVVADAVIKTLQPVSELLTP	DQB1-0201_DQA1-0501;DRB1_1503;DQB1-0302_DQA1-0301;DPB1-0901_DPA1-0201;DRB1_0101	0.509928978	0.515041441	0.438760373
orf1a polyprotein	3314	3338	NPNYEDLLIRKSNHNFLVQAGNVQL	DQB1-0602_DQA1-0102;DQB1-0303_DQA1-0201;DQB1-0502_DQA1-0102;DRB1_0406;DRB1_1405;DRB1_1401;DRB1_0402;DRB1_1404;DQB1-0301_DQA1-0505	0.554955071	0.553056108	0.344576176
orf1ab polyprotein	3314	3338	NPNYEDLLIRKSNHNFLVQAGNVQL	DQB1-0602_DQA1-0102;DQB1-0303_DQA1-0201;DQB1-0502_DQA1-0102;DRB1_0406;DRB1_1405;DRB1_1401;DRB1_0402;DRB1_1404;DQB1-0301_DQA1-0505	0.554955071	0.553056108	0.344576176
surface glycoprotein	208	232	TPINLVRDLPQGFSALEPLVDLPIG	DQB1-0201_DQA1-0501;DRB1_0403;DRB1_0407;DRB1_0803;DRB1_0405;DRB3_0101;DRB1_0801	0.551956256	0.536406262	0.367258916
orf1a polyprotein	1558	1582	TLLSLREVRTIKVFTTVDNINLHTQ	DQB1-0602_DQA1-0102;DQB1-0303_DQA1-0201;DRB1_0404;DRB5_0202;DRB1_0402;DQB1-0603_DQA1-0103;DQB1-0202_DQA1-0201	0.631754332	0.633676671	0.094213281
orf1ab polyprotein	1558	1582	TLLSLREVRTIKVFTTVDNINLHTQ	DQB1-0602_DQA1-0102;DQB1-0303_DQA1-0201;DRB1_0404;DRB5_0202;DRB1_0402;DQB1-0603_DQA1-0103;DQB1-0202_DQA1-0201	0.631754332	0.633676671	0.094213281
orf1ab polyprotein	2492	2516	DSVTVKNGSIHLYFDKAGQKTYERH	DRB1_1503;DRB1_0301;DRB1_0402;DRB1_1501;DQB1-0301_DQA1-0505	0.55452869	0.598799778	0.255524391
orf1a polyprotein	2492	2516	DSVTVKNGSIHLYFDKAGQKTYERH	DRB1_1503;DRB1_0301;DRB1_0402;DRB1_1501;DQB1-0301_DQA1-0505	0.55452869	0.598799778	0.255524391
ORF9b protein	51	75	PLSLNMARKTLNSLEDKAFQLTPIA	DQB1-0201_DQA1-0201;DPB1-1101_DPA1-0201;DRB1_1202;DPB1-0202_DPA1-0103;DQB1-0604_DQA1-0102;DPB1-0201_DPA1-0103;DQB1-0202_DQA1-0201	0.481694607	0.475914351	0.502292397
ORF9b protein	52	76	LSLNMARKTLNSLEDKAFQLTPIAV	DQB1-0201_DQA1-0201;DPB1-1101_DPA1-0201;DRB1_1202;DPB1-0202_DPA1-0103;DQB1-0604_DQA1-0102;DPB1-0201_DPA1-0103;DQB1-0202_DQA1-0201	0.481694607	0.475914351	0.502292397
orf1ab polyprotein	6080	6104	KGLPWNVVRIKIVQMLSDTLKNLSD	DPB1-0101_DPA1-0201;DPB1-0101_DPA1-0103;DPB1-0501_DPA1-0202;DRB1_0102;DRB1_1404;DRB3_0101	0.430706592	0.423591922	0.636046292
orf1ab polyprotein	6079	6103	YKGLPWNVVRIKIVQMLSDTLKNLS	DPB1-0101_DPA1-0201;DPB1-0101_DPA1-0103;DPB1-0501_DPA1-0202;DRB1_0102;DRB1_1404;DRB3_0101	0.430706592	0.423591922	0.636046292
orf1ab polyprotein	6081	6105	GLPWNVVRIKIVQMLSDTLKNLSDR	DPB1-0101_DPA1-0201;DPB1-0101_DPA1-0103;DPB1-0501_DPA1-0202;DRB1_0102;DRB1_1404;DRB3_0101	0.430706592	0.423591922	0.636046292
orf1ab polyprotein	5097	5121	NALLSTDGNKIADKYVRNLQHRLYE	DPB1-0101_DPA1-0202;DPB1-0101_DPA1-0201;DPB1-0101_DPA1-0103;DRB3_0202;DRB1_1202;DRB1_1405;DRB1_1201;DRB1_0701	0.541979054	0.539689715	0.3639778
ORF9b protein	38	62	GPKVYPIILRLGSPLSLNMARKTLN	DRB1_0102;DPB1-0601_DPA1-0103;DQB1-0602_DQA1-0102;DRB1_0401;DPB1-0301_DPA1-0103;DRB1_1101	0.579759584	0.601303299	0.199349397
ORF7a protein	85	109	KLFIRQEEVQELYSPIFLIVAAIVF	DRB1_1201;DPB1-0201_DPA1-0103;DPB1-0402_DPA1-0103;DRB3_0301	0.484555549	0.480562299	0.486328639
[truncated: 6,108 more rows]
