# Supplementary material for: Sequence-based prediction of SARS-CoV-2 vaccine targets using a mass spectrometry-based bioinformatics predictor identifies immunogenic T cell epitopes
Source: Genome Med. 2020 Aug 13;12:70. doi: 10.1186/s13073-020-00767-w (PMC7425796; doi:10.1186/s13073-020-00767-w)
Supplement: Supplementary file 7 — Additional file 7: Table S7. Broadly Binding HLA-II 25mers. The top HLA-II predicted binders from each of the three SARS-CoV-2 proteins: spike, nucleocapsid. (CSV 16 kb) [file 13073_2020_767_MOESM7_ESM.csv]

selection	peptide	protein	cumulative_alleles	USA_cumulative_coverage	EUR_cumulative_coverage	API_cumulative_coverage
1	TPPIKDFGGFNFSQILPDPSKPSKR	surface glycoprotein	DRB1_1001;DQB1-0602_DQA1-0102;DRB1_0401;DRB3_0101;DPB1-0401_DPA1-0103;DPB1-0402_DPA1-0103;DRB1_1303;DQB1-0303_DQA1-0201;DRB1_0405;DRB1_0901;DRB1_0411;DRB1_0404;DPB1-0201_DPA1-0103;DQB1-0302_DQA1-0301;DPB1-0101_DPA1-0202	0.973834913	0.972746354	0.757235018
2	EIDRLNEVAKNLNESLIDLQELGKY	surface glycoprotein	DRB4_0103;DPB1-1401_DPA1-0201;DPB1-0301_DPA1-0103;DRB3_0301;DPB1-0901_DPA1-0201;DPB1-1701_DPA1-0201;DPB1-1001_DPA1-0201;DQB1-0604_DQA1-0102;DQB1-0502_DQA1-0102;DPB1-0501_DPA1-0202;DRB1_1001;DQB1-0602_DQA1-0102;DRB1_0401;DRB3_0101;DPB1-0401_DPA1-0103;DPB1-0402_DPA1-0103;DRB1_1303;DQB1-0303_DQA1-0201;DRB1_0405;DRB1_0901;DRB1_0411;DRB1_0404;DPB1-0201_DPA1-0103;DQB1-0302_DQA1-0301;DPB1-0101_DPA1-0202	0.997968378	0.997785091	0.982843929
3	EKGIYQTSNFRVQPTESIVRFPNIT	surface glycoprotein	DRB1_0701;DRB1_0101;DRB1_1502;DRB1_0406;DPB1-0202_DPA1-0103;DRB1_1501;DRB1_0302;DRB1_1001;DQB1-0602_DQA1-0102;DRB1_0401;DRB3_0101;DPB1-0401_DPA1-0103;DPB1-0402_DPA1-0103;DRB1_1303;DQB1-0303_DQA1-0201;DRB1_0405;DRB1_0901;DRB1_0411;DRB1_0404;DPB1-0201_DPA1-0103;DQB1-0302_DQA1-0301;DPB1-0101_DPA1-0202;DRB4_0103;DPB1-1401_DPA1-0201;DPB1-0301_DPA1-0103;DRB3_0301;DPB1-0901_DPA1-0201;DPB1-1701_DPA1-0201…	0.999240154	0.999337215	0.993124536
4	NPVLPFNDGVYFASTEKSNIIRGWI	surface glycoprotein	DQB1-0301_DQA1-0505;DQB1-0201_DQA1-0501;DRB1_0403;DRB1_1401;DRB1_1405;DQB1-0202_DQA1-0201;DRB1_1001;DQB1-0602_DQA1-0102;DRB1_0401;DRB3_0101;DPB1-0401_DPA1-0103;DPB1-0402_DPA1-0103;DRB1_1303;DQB1-0303_DQA1-0201;DRB1_0405;DRB1_0901;DRB1_0411;DRB1_0404;DPB1-0201_DPA1-0103;DQB1-0302_DQA1-0301;DPB1-0101_DPA1-0202;DRB4_0103;DPB1-1401_DPA1-0201;DPB1-0301_DPA1-0103;DRB3_0301;DPB1-0901_DPA1-0201;DPB1-1701…	0.999858413	0.999876975	0.99580064
5	VFNATRFASVYAWNRKRISNCVADY	surface glycoprotein	DPB1-1301_DPA1-0201;DRB5_0101;DRB5_0102;DRB1_1301;DRB1_1102;DRB1_1101;DRB1_1001;DQB1-0602_DQA1-0102;DRB1_0401;DRB3_0101;DPB1-0401_DPA1-0103;DPB1-0402_DPA1-0103;DRB1_1303;DQB1-0303_DQA1-0201;DRB1_0405;DRB1_0901;DRB1_0411;DRB1_0404;DPB1-0201_DPA1-0103;DQB1-0302_DQA1-0301;DPB1-0101_DPA1-0202;DRB4_0103;DPB1-1401_DPA1-0201;DPB1-0301_DPA1-0103;DRB3_0301;DPB1-0901_DPA1-0201;DPB1-1701_DPA1-0201;DPB1-1001…	0.999972793	0.999977974	0.997479301
6	ISNCVADYSVLYNSASFSTFKCYGV	surface glycoprotein	DRB1_0802;DRB1_0301;DRB3_0201;DRB3_0202;DRB1_1001;DQB1-0602_DQA1-0102;DRB1_0401;DRB3_0101;DPB1-0401_DPA1-0103;DPB1-0402_DPA1-0103;DRB1_1303;DQB1-0303_DQA1-0201;DRB1_0405;DRB1_0901;DRB1_0411;DRB1_0404;DPB1-0201_DPA1-0103;DQB1-0302_DQA1-0301;DPB1-0101_DPA1-0202;DRB4_0103;DPB1-1401_DPA1-0201;DPB1-0301_DPA1-0103;DRB3_0301;DPB1-0901_DPA1-0201;DPB1-1701_DPA1-0201;DPB1-1001_DPA1-0201;DQB1-0604_DQA1-0102…	0.999997199	0.999998271	0.99834997
7	IGIVNNTVYDPLQPELDSFKEELDK	surface glycoprotein	DQB1-0201_DQA1-0201;DQB1-0603_DQA1-0103;DRB1_0803;DQB1-0501_DQA1-0101;DRB1_1001;DQB1-0602_DQA1-0102;DRB1_0401;DRB3_0101;DPB1-0401_DPA1-0103;DPB1-0402_DPA1-0103;DRB1_1303;DQB1-0303_DQA1-0201;DRB1_0405;DRB1_0901;DRB1_0411;DRB1_0404;DPB1-0201_DPA1-0103;DQB1-0302_DQA1-0301;DPB1-0101_DPA1-0202;DRB4_0103;DPB1-1401_DPA1-0201;DPB1-0301_DPA1-0103;DRB3_0301;DPB1-0901_DPA1-0201;DPB1-1701_DPA1-0201;DPB1-1001…	0.999999399	0.99999962	0.99914902
8	DEVRQIAPGQTGKIADYNYKLPDDF	surface glycoprotein	DQB1-0301_DQA1-0601;DQB1-0601_DQA1-0103;DQB1-0301_DQA1-0303;DRB1_1001;DQB1-0602_DQA1-0102;DRB1_0401;DRB3_0101;DPB1-0401_DPA1-0103;DPB1-0402_DPA1-0103;DRB1_1303;DQB1-0303_DQA1-0201;DRB1_0405;DRB1_0901;DRB1_0411;DRB1_0404;DPB1-0201_DPA1-0103;DQB1-0302_DQA1-0301;DPB1-0101_DPA1-0202;DRB4_0103;DPB1-1401_DPA1-0201;DPB1-0301_DPA1-0103;DRB3_0301;DPB1-0901_DPA1-0201;DPB1-1701_DPA1-0201;DPB1-1001_DPA1-0201…	0.999999843	0.999999901	0.999545629
9	GDSTECSNLLLQYGSFCTQLNRALT	surface glycoprotein	DRB1_0102;DQB1-0303_DQA1-0301;DRB1_1602;DRB1_1503;DRB1_1001;DQB1-0602_DQA1-0102;DRB1_0401;DRB3_0101;DPB1-0401_DPA1-0103;DPB1-0402_DPA1-0103;DRB1_1303;DQB1-0303_DQA1-0201;DRB1_0405;DRB1_0901;DRB1_0411;DRB1_0404;DPB1-0201_DPA1-0103;DQB1-0302_DQA1-0301;DPB1-0101_DPA1-0202;DRB4_0103;DPB1-1401_DPA1-0201;DPB1-0301_DPA1-0103;DRB3_0301;DPB1-0901_DPA1-0201;DPB1-1701_DPA1-0201;DPB1-1001_DPA1-0201;DQB1-0604…	0.999999899	0.99999992	0.999816069
10	KNIDGYFKIYSKHTPINLVRDLPQG	surface glycoprotein	DRB1_1302;DRB1_0801;DRB1_0407;DRB1_1001;DQB1-0602_DQA1-0102;DRB1_0401;DRB3_0101;DPB1-0401_DPA1-0103;DPB1-0402_DPA1-0103;DRB1_1303;DQB1-0303_DQA1-0201;DRB1_0405;DRB1_0901;DRB1_0411;DRB1_0404;DPB1-0201_DPA1-0103;DQB1-0302_DQA1-0301;DPB1-0101_DPA1-0202;DRB4_0103;DPB1-1401_DPA1-0201;DPB1-0301_DPA1-0103;DRB3_0301;DPB1-0901_DPA1-0201;DPB1-1701_DPA1-0201;DPB1-1001_DPA1-0201;DQB1-0604_DQA1-0102;DQB1-0502…	0.999999965	0.999999976	0.99988227
11	HADQLTPTWRVYSTGSNVFQTRAGC	surface glycoprotein	DPB1-0601_DPA1-0103;DQB1-0401_DQA1-0301;DRB1_0804;DRB1_1104;DRB1_1001;DQB1-0602_DQA1-0102;DRB1_0401;DRB3_0101;DPB1-0401_DPA1-0103;DPB1-0402_DPA1-0103;DRB1_1303;DQB1-0303_DQA1-0201;DRB1_0405;DRB1_0901;DRB1_0411;DRB1_0404;DPB1-0201_DPA1-0103;DQB1-0302_DQA1-0301;DPB1-0101_DPA1-0202;DRB4_0103;DPB1-1401_DPA1-0201;DPB1-0301_DPA1-0103;DRB3_0301;DPB1-0901_DPA1-0201;DPB1-1701_DPA1-0201;DPB1-1001_DPA1-0201…	0.999999987	0.999999993	0.999925762
12	FIAGLIAIVMVTIMLCCMTSCCSCL	surface glycoprotein	DRB1_1601;DRB1_1202;DPB1-0501_DPA1-0201;DRB1_1001;DQB1-0602_DQA1-0102;DRB1_0401;DRB3_0101;DPB1-0401_DPA1-0103;DPB1-0402_DPA1-0103;DRB1_1303;DQB1-0303_DQA1-0201;DRB1_0405;DRB1_0901;DRB1_0411;DRB1_0404;DPB1-0201_DPA1-0103;DQB1-0302_DQA1-0301;DPB1-0101_DPA1-0202;DRB4_0103;DPB1-1401_DPA1-0201;DPB1-0301_DPA1-0103;DRB3_0301;DPB1-0901_DPA1-0201;DPB1-1701_DPA1-0201;DPB1-1001_DPA1-0201;DQB1-0604_DQA1-0102…	0.999999992	0.999999995	0.99998906
1	KDLPKEITVATSRTLSYYKLGASQR	membrane glycoprotein	DQB1-0301_DQA1-0505;DRB1_0102;DQB1-0502_DQA1-0102;DRB1_1601;DRB1_1503;DRB1_0101;DRB1_0403;DRB1_0406;DRB5_0102;DQB1-0303_DQA1-0201;DRB1_0402;DRB1_1301;DRB1_0404;DRB1_0901;DRB1_1406;DRB1_1501;DQB1-0202_DQA1-0201;DRB1_1602	0.80234689	0.814186084	0.610991649
2	MADSNGTITVEELKKLLEQWNLVIG	membrane glycoprotein	DRB1_1101;DPB1-0402_DPA1-0103;DRB1_0803;DRB1_1104;DQB1-0201_DQA1-0201;DRB1_0804;DQB1-0302_DQA1-0301;DRB1_0801;DRB1_1102;DQB1-0301_DQA1-0303;DQB1-0301_DQA1-0505;DRB1_0102;DQB1-0502_DQA1-0102;DRB1_1601;DRB1_1503;DRB1_0101;DRB1_0403;DRB1_0406;DRB5_0102;DQB1-0303_DQA1-0201;DRB1_0402;DRB1_1301;DRB1_0404;DRB1_0901;DRB1_1406;DRB1_1501;DQB1-0202_DQA1-0201;DRB1_1602	0.939298521	0.942213239	0.827034037
3	LWLLWPVTLACFVLAAVYRINWITG	membrane glycoprotein	DQB1-0602_DQA1-0102;DQB1-0501_DQA1-0101;DRB3_0202;DQB1-0301_DQA1-0505;DRB1_0102;DQB1-0502_DQA1-0102;DRB1_1601;DRB1_1503;DRB1_0101;DRB1_0403;DRB1_0406;DRB5_0102;DQB1-0303_DQA1-0201;DRB1_0402;DRB1_1301;DRB1_0404;DRB1_0901;DRB1_1406;DRB1_1501;DQB1-0202_DQA1-0201;DRB1_1602;DRB1_1101;DPB1-0402_DPA1-0103;DRB1_0803;DRB1_1104;DQB1-0201_DQA1-0201;DRB1_0804;DQB1-0302_DQA1-0301;DRB1_0801;DRB1_1102;DQB1-0301…	0.987315805	0.987924866	0.856152471
4	FIASFRLFARTRSMWSFNPETNILL	membrane glycoprotein	DRB1_0802;DRB1_0701;DRB1_0401;DRB1_0407;DQB1-0301_DQA1-0505;DRB1_0102;DQB1-0502_DQA1-0102;DRB1_1601;DRB1_1503;DRB1_0101;DRB1_0403;DRB1_0406;DRB5_0102;DQB1-0303_DQA1-0201;DRB1_0402;DRB1_1301;DRB1_0404;DRB1_0901;DRB1_1406;DRB1_1501;DQB1-0202_DQA1-0201;DRB1_1602;DRB1_1101;DPB1-0402_DPA1-0103;DRB1_0803;DRB1_1104;DQB1-0201_DQA1-0201;DRB1_0804;DQB1-0302_DQA1-0301;DRB1_0801;DRB1_1102;DQB1-0301_DQA1-0303…	0.995850356	0.996744537	0.905042051
5	ASQRVAGDSGFAAYSRYRIGNYKLN	membrane glycoprotein	DRB1_1302;DQB1-0303_DQA1-0301;DRB1_1502;DQB1-0301_DQA1-0505;DRB1_0102;DQB1-0502_DQA1-0102;DRB1_1601;DRB1_1503;DRB1_0101;DRB1_0403;DRB1_0406;DRB5_0102;DQB1-0303_DQA1-0201;DRB1_0402;DRB1_1301;DRB1_0404;DRB1_0901;DRB1_1406;DRB1_1501;DQB1-0202_DQA1-0201;DRB1_1602;DRB1_1101;DPB1-0402_DPA1-0103;DRB1_0803;DRB1_1104;DQB1-0201_DQA1-0201;DRB1_0804;DQB1-0302_DQA1-0301;DRB1_0801;DRB1_1102;DQB1-0301_DQA1-0303…	0.99728894	0.99784274	0.966491644
1	NGGDAALALLLLDRLNQLESKMSGK	nucleocapsid phosphoprotein	DRB4_0103;DRB3_0101;DRB1_1104;DRB3_0301;DRB1_0804;DRB1_1301;DRB1_1406;DRB1_1405;DQB1-0303_DQA1-0301;DRB1_1102;DRB1_1101	0.825313968	0.821672229	0.411627762
2	VTPSGTWLTYTGAIKLDDKDPNFKD	nucleocapsid phosphoprotein	DRB1_0701;DRB5_0101;DRB1_0301;DRB1_1303;DRB1_1502;DRB4_0103;DRB3_0101;DRB1_1104;DRB3_0301;DRB1_0804;DRB1_1301;DRB1_1406;DRB1_1405;DQB1-0303_DQA1-0301;DRB1_1102;DRB1_1101	0.961337623	0.963944963	0.661483556
3	GLPYGANKDGIIWVATEGALNTPKD	nucleocapsid phosphoprotein	DRB1_1001;DQB1-0602_DQA1-0102;DRB1_0401;DRB1_1503;DRB1_0403;DRB1_0404;DRB1_0407;DQB1-0202_DQA1-0201;DPB1-0101_DPA1-0201;DRB4_0103;DRB3_0101;DRB1_1104;DRB3_0301;DRB1_0804;DRB1_1301;DRB1_1406;DRB1_1405;DQB1-0303_DQA1-0301;DRB1_1102;DRB1_1101;DRB1_0701;DRB5_0101;DRB1_0301;DRB1_1303;DRB1_1502	0.989536088	0.990345983	0.76263538
4	RPQGLPNNTASWFTALTQHGKEDLK	nucleocapsid phosphoprotein	DQB1-0601_DQA1-0103;DRB1_1402;DQB1-0303_DQA1-0201;DRB1_0802;DQB1-0302_DQA1-0301;DQB1-0502_DQA1-0102;DRB4_0103;DRB3_0101;DRB1_1104;DRB3_0301;DRB1_0804;DRB1_1301;DRB1_1406;DRB1_1405;DQB1-0303_DQA1-0301;DRB1_1102;DRB1_1101;DRB1_0701;DRB5_0101;DRB1_0301;DRB1_1303;DRB1_1502;DRB1_1001;DQB1-0602_DQA1-0102;DRB1_0401;DRB1_1503;DRB1_0403;DRB1_0404;DRB1_0407;DQB1-0202_DQA1-0201;DPB1-0101_DPA1-0201	0.993939124	0.9939026	0.872582393
5	GTTLPKGFYAEGSRGGSQASSRSSS	nucleocapsid phosphoprotein	DPB1-0601_DPA1-0103;DQB1-0401_DQA1-0301;DRB1_1601;DQB1-0201_DQA1-0501;DRB4_0103;DRB3_0101;DRB1_1104;DRB3_0301;DRB1_0804;DRB1_1301;DRB1_1406;DRB1_1405;DQB1-0303_DQA1-0301;DRB1_1102;DRB1_1101;DRB1_0701;DRB5_0101;DRB1_0301;DRB1_1303;DRB1_1502;DRB1_1001;DQB1-0602_DQA1-0102;DRB1_0401;DRB1_1503;DRB1_0403;DRB1_0404;DRB1_0407;DQB1-0202_DQA1-0201;DPB1-0101_DPA1-0201;DQB1-0601_DQA1-0103;DRB1_1402;DQB1-0303…	0.996624382	0.996645348	0.914327746
6	IKLDDKDPNFKDQVILLNKHIDAYK	nucleocapsid phosphoprotein	DRB1_0803;DRB1_0801;DRB3_0202;DRB3_0201;DRB4_0103;DRB3_0101;DRB1_1104;DRB3_0301;DRB1_0804;DRB1_1301;DRB1_1406;DRB1_1405;DQB1-0303_DQA1-0301;DRB1_1102;DRB1_1101;DRB1_0701;DRB5_0101;DRB1_0301;DRB1_1303;DRB1_1502;DRB1_1001;DQB1-0602_DQA1-0102;DRB1_0401;DRB1_1503;DRB1_0403;DRB1_0404;DRB1_0407;DQB1-0202_DQA1-0201;DPB1-0101_DPA1-0201;DQB1-0601_DQA1-0103;DRB1_1402;DQB1-0303_DQA1-0201;DRB1_0802;DQB1-0302…	0.999217948	0.999236372	0.930092377
7	RQKKQQTVTLLPAADLDDFSKQLQQ	nucleocapsid phosphoprotein	DRB1_0102;DRB1_0101;DRB5_0202;DRB1_1202;DRB1_1201;DRB4_0103;DRB3_0101;DRB1_1104;DRB3_0301;DRB1_0804;DRB1_1301;DRB1_1406;DRB1_1405;DQB1-0303_DQA1-0301;DRB1_1102;DRB1_1101;DRB1_0701;DRB5_0101;DRB1_0301;DRB1_1303;DRB1_1502;DRB1_1001;DQB1-0602_DQA1-0102;DRB1_0401;DRB1_1503;DRB1_0403;DRB1_0404;DRB1_0407;DQB1-0202_DQA1-0201;DPB1-0101_DPA1-0201;DQB1-0601_DQA1-0103;DRB1_1402;DQB1-0303_DQA1-0201;DRB1_0802…	0.999695316	0.99972409	0.960521239
8	KPRQKRTATKAYNVTQAFGRRGPEQ	nucleocapsid phosphoprotein	DPB1-0301_DPA1-0103;DRB5_0102;DPB1-0901_DPA1-0201;DRB4_0103;DRB3_0101;DRB1_1104;DRB3_0301;DRB1_0804;DRB1_1301;DRB1_1406;DRB1_1405;DQB1-0303_DQA1-0301;DRB1_1102;DRB1_1101;DRB1_0701;DRB5_0101;DRB1_0301;DRB1_1303;DRB1_1502;DRB1_1001;DQB1-0602_DQA1-0102;DRB1_0401;DRB1_1503;DRB1_0403;DRB1_0404;DRB1_0407;DQB1-0202_DQA1-0201;DPB1-0101_DPA1-0201;DQB1-0601_DQA1-0103;DRB1_1402;DQB1-0303_DQA1-0201;DRB1_0802…	0.999813547	0.999831155	0.968822689
9	LPAADLDDFSKQLQQSMSSADSTQA	nucleocapsid phosphoprotein	DRB1_0405;DRB1_0901;DRB1_0411;DRB1_1302;DRB4_0103;DRB3_0101;DRB1_1104;DRB3_0301;DRB1_0804;DRB1_1301;DRB1_1406;DRB1_1405;DQB1-0303_DQA1-0301;DRB1_1102;DRB1_1101;DRB1_0701;DRB5_0101;DRB1_0301;DRB1_1303;DRB1_1502;DRB1_1001;DQB1-0602_DQA1-0102;DRB1_0401;DRB1_1503;DRB1_0403;DRB1_0404;DRB1_0407;DQB1-0202_DQA1-0201;DPB1-0101_DPA1-0201;DQB1-0601_DQA1-0103;DRB1_1402;DQB1-0303_DQA1-0201;DRB1_0802;DQB1-0302…	0.999905232	0.999893752	0.992082087
10	KDGIIWVATEGALNTPKDHIGTRNP	nucleocapsid phosphoprotein	DQB1-0603_DQA1-0103;DRB4_0103;DRB3_0101;DRB1_1104;DRB3_0301;DRB1_0804;DRB1_1301;DRB1_1406;DRB1_1405;DQB1-0303_DQA1-0301;DRB1_1102;DRB1_1101;DRB1_0701;DRB5_0101;DRB1_0301;DRB1_1303;DRB1_1502;DRB1_1001;DQB1-0602_DQA1-0102;DRB1_0401;DRB1_1503;DRB1_0403;DRB1_0404;DRB1_0407;DQB1-0202_DQA1-0201;DPB1-0101_DPA1-0201;DQB1-0601_DQA1-0103;DRB1_1402;DQB1-0303_DQA1-0201;DRB1_0802;DQB1-0302_DQA1-0301;DQB1-0502…	0.999927285	0.999918476	0.992082087
